# Supplementary material for: Genome-wide DNA methylation profiles of low- and high-grade adenoma reveals potential biomarkers for early detection of colorectal carcinoma
Source: PubMed Central journal article supplement (PMC7175491; doi:10.1186/s13148-020-00851-3), 2020-04-21
Supplement: 13148_2020_851_MOESM1_ESM.pdf [file 13148_2020_851_MOESM1_ESM.pdf]

## Supplementary

### Figure S1-S and Table S1-S7

**Figure S1.** Hyper DMSs (Left) and hypo DMSs (Right) shared between HGA (High grade adenoma), LGA (Low grade adenoma) and Normal groups or specific to each group.

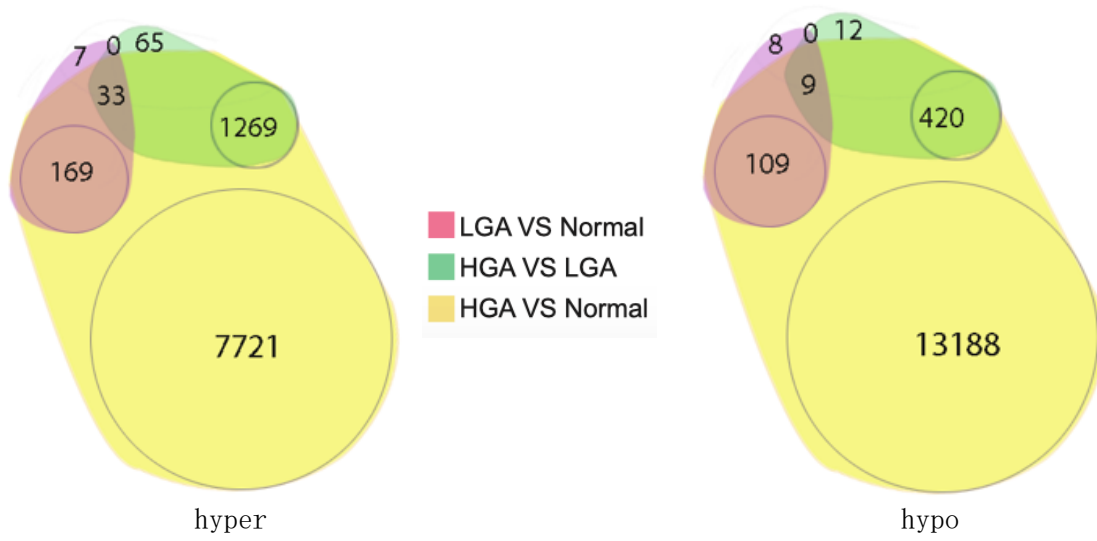

**Figure S2.** Methylation levels of 209 hyper-methylated DMSs in our datasets (Normal, LGA, HGA), 51 public adenoma datasets (AD) and 504 public datasets cancer (Cancer).

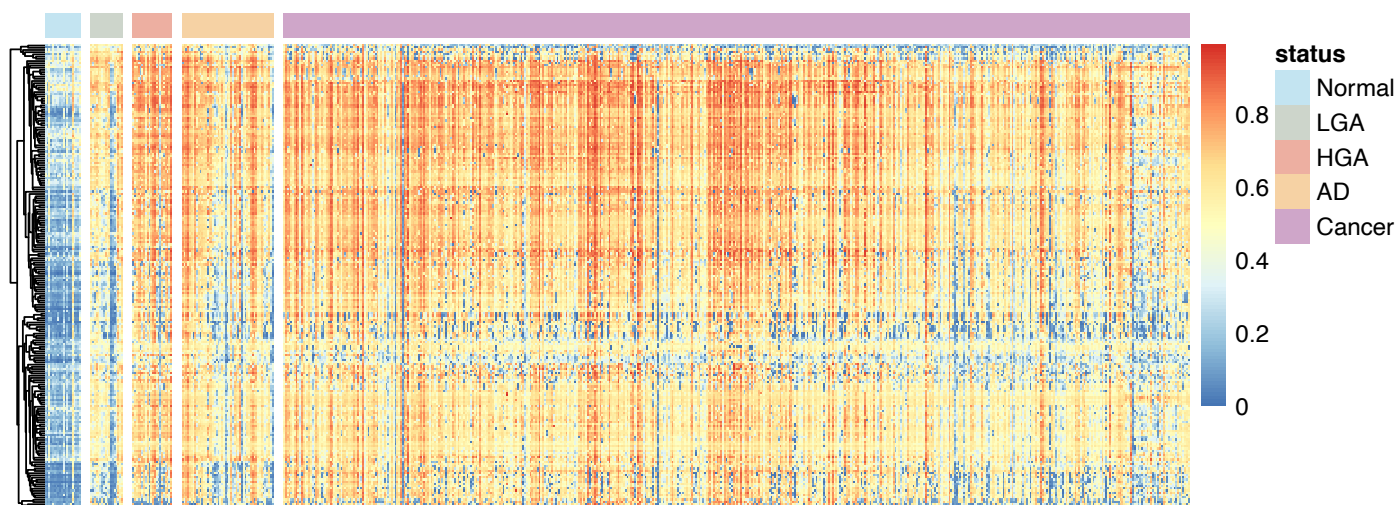

AD, Adenoma; HGA, High grade adenoma; LGA, Low grade adenoma.

**Figure S3.** Methylation levels of the 441 hypo-methylated DMSs in our datasets (Normal, LGA, HGA), and 504 public cancer datasets (Cancer).

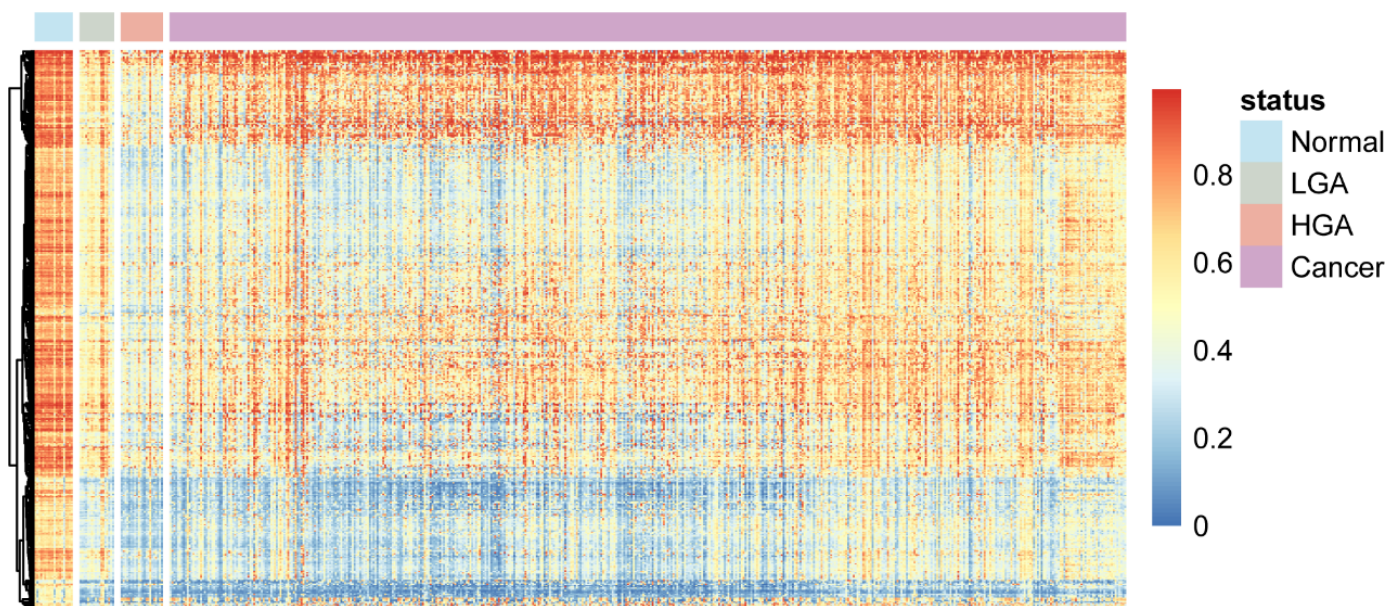

HGA, High grade adenoma; LGA, Low grade adenoma.

**Figure S4.** Receiver operating characteristic curve for the performance of ACSS3 in the prediction of colorectal adenoma and cancer.

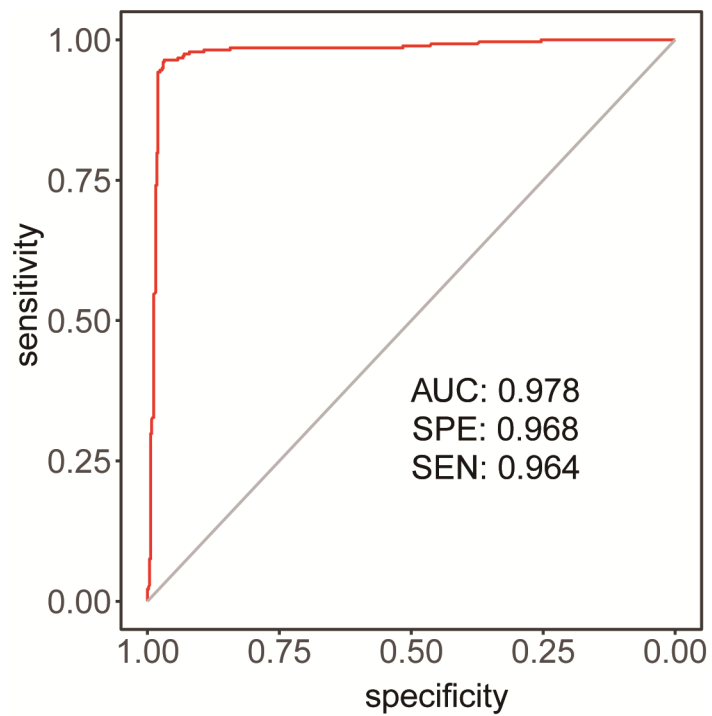

AUC, Area under the ROC Curve; SPE, specificity; SEN, sensitivity.

**Figure S5.** The correlation of methylation levels (beta value) between *ADHFE1* and *SEPT9*(Pearson correlation coefficient=0.77, p-value <2.2e-16).

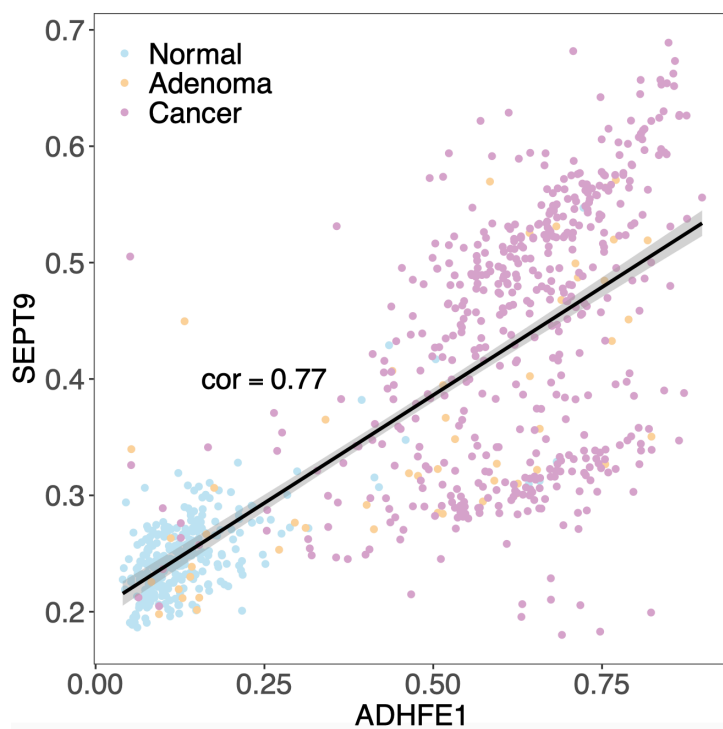

**Figure S6.** The DNA methylation level of *ADHFE1* promoter in the public datasets obtained from whole blood (WB), normal colorectal tissue (Normal), adenoma (AD) and cancer (Cancer).

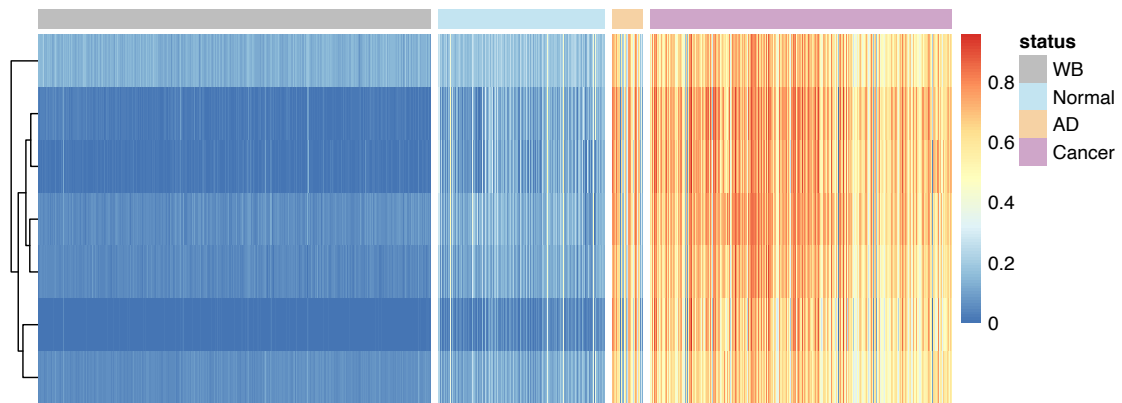

**Figure S7.** Methylation levels in our normal samples (Normal) and public datasets (WB, AD, and Cancer) for 209 hyper-methylated DMSs identified in LGA. (A) Public datasets include 656 whole blood (WB) samples and 51 adenoma (AD) and 504 cancer samples. (B) Density plot of DNA methylation values (beta values) of 209 sites in all samples.

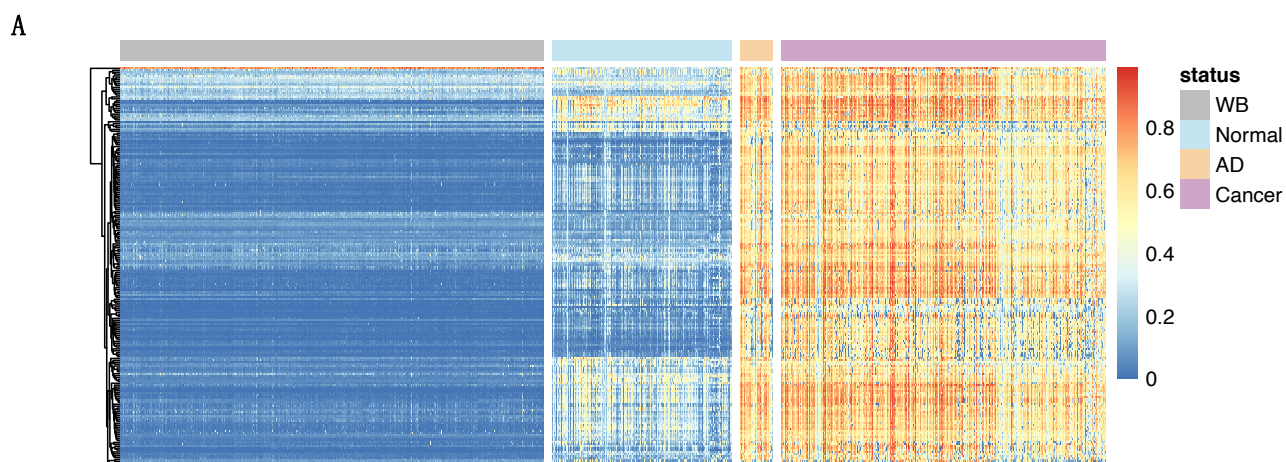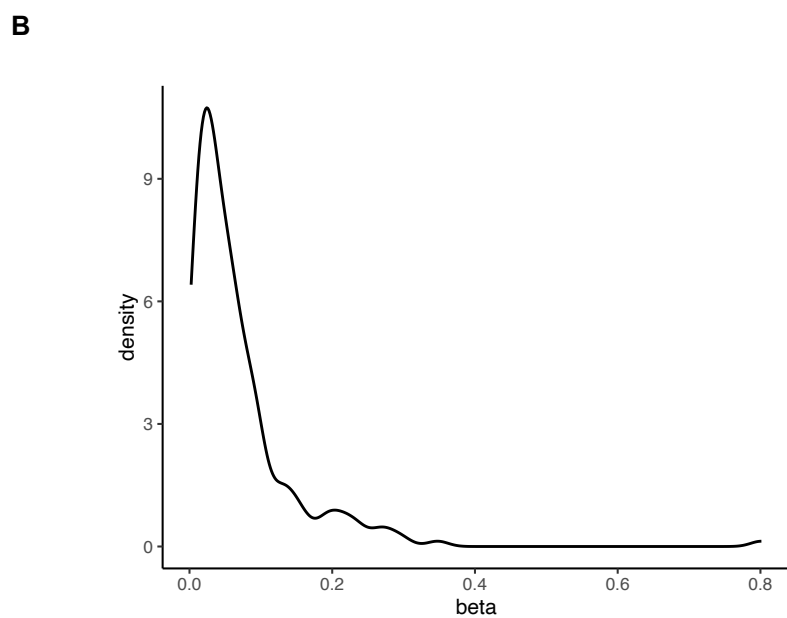

**Figure S8.** Density of all beta values (top panel) and multi-dimensional scaling (MDS) (bottom panel) according to 10000 most variable positions for samples in high grade adenoma (HGA), low grade adenoma (LGA) and normal tissue (CTR) before (A) and after (B) normalization. The density plots demonstrate relatively consistent distribution of beta values across all sample even before normalization. According to the 10000 most variable positions, the MDS plots show the samples clustering according to their pathological groups. Particularly, normal tissues (green dots) have high homogeneity, forming a dense cluster in the bottom left corner of the plot; and heterogeneity of samples increase from normal tissues, low-grade lesions (orange dots) to high-grade ones (purple dots), as sample dots having increased spacing from bottom left to top right.

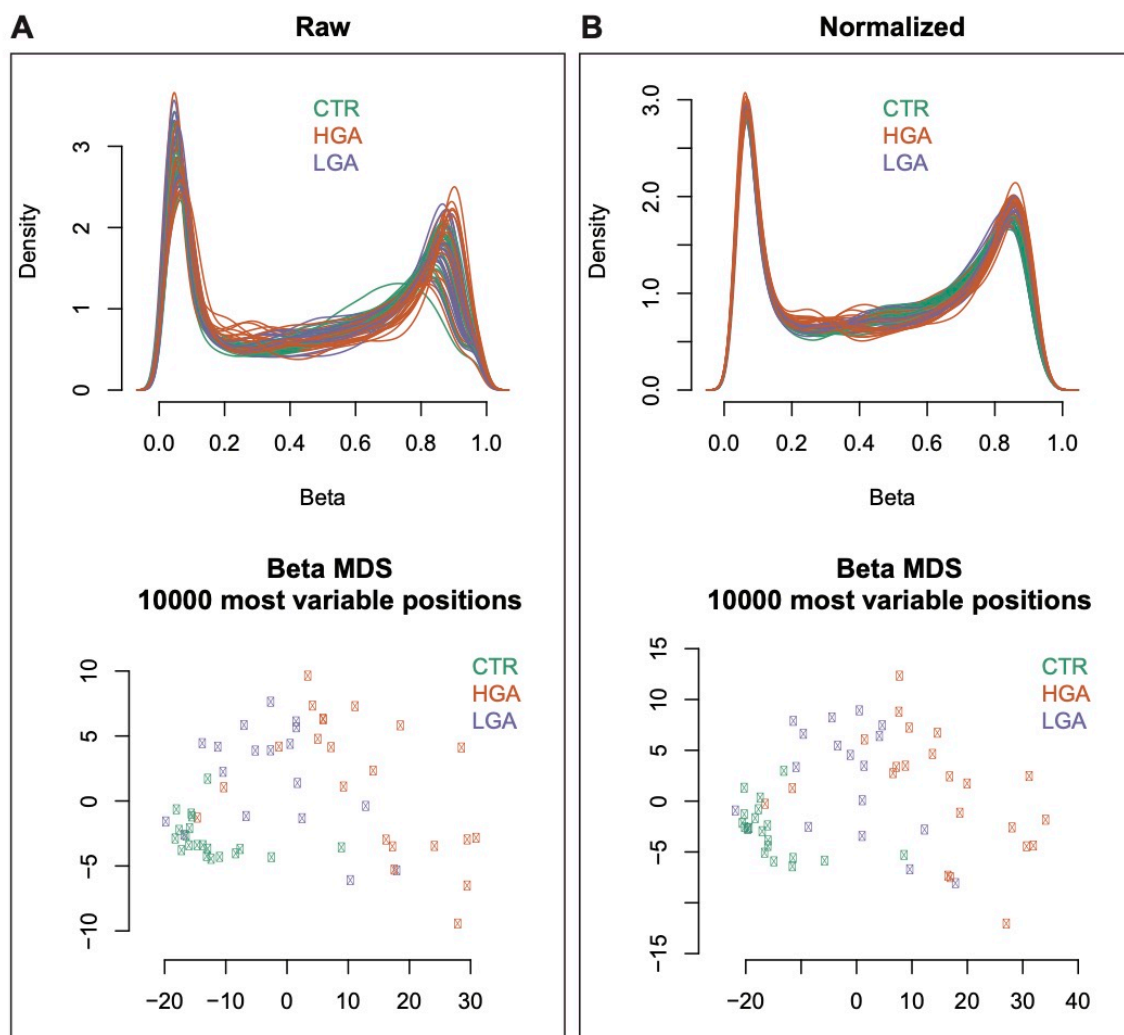



**Figure S9.** Multi-dimensional scaling (MDS) according to 1000 (Top panel) and 20000 (Bottom panel) most variable positions for samples in high grade adenoma (HGA), low grade adenoma (LGA) and normal tissue (CTR) before (A) and after (B) normalization.

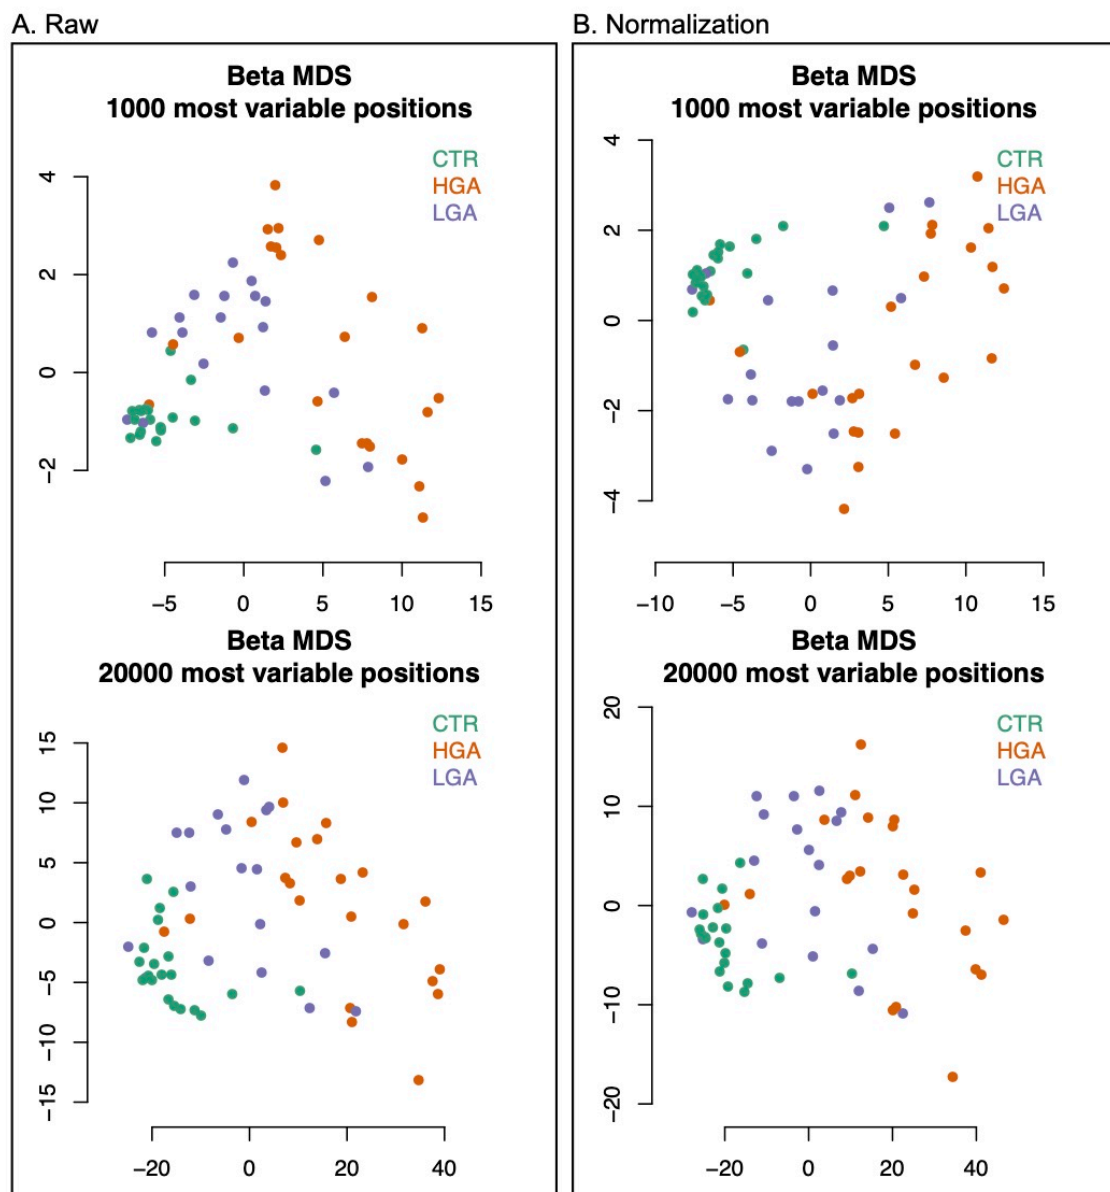

**Table S1. 209 hypermethylated sites identified in low grade adenoma (LGA)**

| Site       | Genome Build | CHR | MAPINFO   | Normal     | LGA         | HGA         | adjust_Pvalue NvsLGA | adjust_Pvalue LGAvsHGA | adjust_Pvalue NvsHGA |
|------------|--------------|-----|-----------|------------|-------------|-------------|----------------------|------------------------|----------------------|
| cg00020052 | 37           | 2   | 68546899  | 0.23136902 | 0.466805272 | 0.635286005 | 0.000898052          | 0.03969754             | 8.01E-09             |
| cg00040312 | 37           | 12  | 54424679  | 0.24658703 | 0.533574522 | 0.53622255  | 0.000197276          | 0.984520615            | 6.46E-05             |
| cg00282249 | 37           | 13  | 37005566  | 0.36844691 | 0.583477789 | 0.791529464 | 0.006565803          | 0.014133303            | 3.84E-09             |
| cg00355909 | 37           | 16  | 66638320  | 0.13975618 | 0.401161351 | 0.561495149 | 0.000840753          | 0.064344031            | 1.63E-08             |
| cg00733780 | 37           | 10  | 26505127  | 0.16012539 | 0.426726882 | 0.665615991 | 0.003593066          | 0.030625483            | 1.56E-08             |
| cg00813378 | 37           | 1   | 1475209   | 0.30676306 | 0.544580617 | 0.714805482 | 0.00016874           | 0.013619349            | 8.14E-12             |
| cg00852573 | 37           | 6   | 73331405  | 0.236188   | 0.456947117 | 0.638643491 | 0.001665943          | 0.021093417            | 3.75E-10             |
| cg00875960 | 37           | 19  | 12267308  | 0.10272328 | 0.327694726 | 0.425758516 | 0.001322148          | 0.375074123            | 9.34E-05             |
| cg01030534 | 37           | 7   | 143579698 | 0.32621562 | 0.545651991 | 0.755693005 | 0.004370561          | 0.019170311            | 3.23E-08             |
| cg01218180 | 37           | 6   | 168079427 | 0.38557129 | 0.586262172 | 0.609416336 | 0.000925468          | 0.844305442            | 0.001945823          |
| cg01423964 | 37           | 1   | 111217575 | 0.17318003 | 0.378962396 | 0.5024522   | 0.000791049          | 0.048748879            | 4.68E-10             |
| cg01434608 | 37           | 16  | 66637927  | 0.14964989 | 0.483057287 | 0.6921871   | 8.95E-05             | 0.027798156            | 3.61E-10             |
| cg01645753 | 37           | 15  | 83316734  | 0.12867791 | 0.342694529 | 0.487296186 | 0.000851587          | 0.061416152            | 7.19E-09             |
| cg01733176 | 37           | 4   | 111561070 | 0.14940011 | 0.352511639 | 0.455303493 | 0.005952565          | 0.31219778             | 3.14E-06             |
| cg02183671 | 37           | 4   | 15779999  | 0.21345019 | 0.439392783 | 0.552727605 | 0.000174878          | 0.135764333            | 8.97E-08             |
| cg02379560 | 37           | 4   | 40859280  | 0.40072311 | 0.604289656 | 0.7104728   | 0.001468454          | 0.139886289            | 3.27E-08             |
| cg02721000 | 37           | 12  | 54441213  | 0.24752654 | 0.460540631 | 0.481018005 | 0.00215586           | 0.864691564            | 0.000394073          |
| cg02764245 | 37           | 2   | 66803033  | 0.27810112 | 0.492759667 | 0.675875877 | 0.004900115          | 0.045948804            | 1.39E-08             |
| cg02864844 | 37           | 7   | 149917263 | 0.2320133  | 0.510892178 | 0.728712064 | 0.000863947          | 0.02435264             | 1.16E-09             |
| cg02866454 | 37           | 10  | 7453455   | 0.1643021  | 0.427882621 | 0.590275759 | 0.001679439          | 0.1615268              | 2.03E-06             |
| cg02899206 | 37           | 10  | 1779835   | 0.09471257 | 0.305062148 | 0.495525459 | 0.003073409          | 0.0806002              | 6.28E-06             |
| cg03078363 | 37           | 12  | 54408664  | 0.23129798 | 0.441945717 | 0.519815255 | 0.002368046          | 0.439506168            | 9.61E-06             |
| cg03117976 | 37           | 18  | 11149435  | 0.3027036  | 0.522335483 | 0.666185114 | 0.002263847          | 0.103753323            | 8.10E-08             |
| cg03225210 | 37           | 7   | 143579951 | 0.19720376 | 0.430098596 | 0.677633299 | 0.001239685          | 0.01023122             | 3.04E-09             |
| cg03257172 | 37           | 1   | 200010283 | 0.21446685 | 0.554361689 | 0.720850982 | 2.22E-05             | 0.027849179            | 1.31E-11             |
| cg03279535 | 37           | 2   | 31360817  | 0.09539126 | 0.30993486  | 0.483015598 | 0.00032385           | 0.04246646             | 2.76E-07             |
| cg03377355 | 37           | 22  | 39853885  | 0.13826644 | 0.349524212 | 0.496863701 | 0.001864993          | 0.110921965            | 1.81E-06             |

|               |    |           |            |             |             |             |             |             |
|---------------|----|-----------|------------|-------------|-------------|-------------|-------------|-------------|
| cg03596016 37 | 1  | 246952362 | 0.39488229 | 0.648997217 | 0.695571504 | 5.67E-05    | 0.62895814  | 3.38E-05    |
| cg03701427 37 | 10 | 82117089  | 0.26275661 | 0.526916167 | 0.688774482 | 0.000577396 | 0.097578083 | 3.12E-07    |
| cg03807298 37 | 5  | 174159039 | 0.31149649 | 0.594163906 | 0.732847723 | 6.15E-05    | 0.040692162 | 1.05E-10    |
| cg03940848 37 | 1  | 229543112 | 0.16761911 | 0.380126936 | 0.578137168 | 0.003376184 | 0.040990526 | 1.50E-07    |
| cg03943773 37 | 4  | 111552308 | 0.15552379 | 0.35999463  | 0.323877935 | 0.018927843 | 0.793411377 | 0.015851446 |
| cg03958798 37 | 10 | 106400686 | 0.24316737 | 0.444487456 | 0.647952041 | 0.003990279 | 0.030678859 | 2.21E-07    |
| cg04021697 37 | 1  | 3567303   | 0.26262794 | 0.487904978 | 0.717875327 | 0.003273044 | 0.012568362 | 1.25E-10    |
| cg04249706 37 | 10 | 11206772  | 0.46460104 | 0.697093106 | 0.764317677 | 0.000105792 | 0.068093127 | 3.71E-07    |
| cg04286194 37 | 5  | 54519023  | 0.42022171 | 0.641657806 | 0.748797173 | 0.000213123 | 0.09562058  | 3.28E-08    |
| cg04308769 37 | 1  | 200007623 | 0.34395261 | 0.560091261 | 0.695229973 | 3.70E-05    | 0.011297606 | 3.65E-11    |
| cg04366687 37 | 8  | 145107199 | 0.23648703 | 0.475554278 | 0.587057318 | 0.000208896 | 0.124390075 | 2.16E-08    |
| cg04897742 37 | 1  | 16085148  | 0.07020286 | 0.292923521 | 0.476116717 | 8.90E-05    | 0.019075262 | 2.29E-08    |
| cg04996873 37 | 1  | 14925992  | 0.32198241 | 0.560278044 | 0.680339914 | 0.00026173  | 0.118268026 | 2.60E-08    |
| cg05089090 37 | 13 | 37005570  | 0.33815074 | 0.568008194 | 0.784545614 | 0.002766968 | 0.010218487 | 7.78E-10    |
| cg05143887 37 | 12 | 81471938  | 0.30218817 | 0.503878411 | 0.559543672 | 0.000236301 | 0.425037083 | 2.04E-06    |
| cg05297854 37 | 22 | 50623687  | 0.37414293 | 0.576275728 | 0.708728995 | 0.004354577 | 0.091493792 | 6.98E-07    |
| cg05362548 37 | 8  | 11205166  | 0.17393834 | 0.379020909 | 0.539407434 | 0.011859945 | 0.179406536 | 2.67E-05    |
| cg05447008 37 | 6  | 73331114  | 0.15404172 | 0.367787363 | 0.60889319  | 0.003320673 | 0.010990564 | 5.72E-09    |
| cg05494604 37 | 13 | 23733862  | 0.29113246 | 0.493931233 | 0.682258318 | 0.003627745 | 0.020980083 | 1.12E-09    |
| cg05590196 37 | 1  | 33220274  | 0.34146534 | 0.565907633 | 0.660017491 | 0.000431062 | 0.191687144 | 2.16E-08    |
| cg05827631 37 | 1  | 121261404 | 0.29990762 | 0.509273911 | 0.628046886 | 0.000132054 | 0.019841876 | 1.85E-09    |
| cg05901579 37 | 15 | 88800567  | 0.268582   | 0.490748681 | 0.704944941 | 0.008616924 | 0.024812339 | 2.29E-09    |
| cg05915293 37 | 16 | 2041512   | 0.18901523 | 0.413525065 | 0.597378009 | 0.001198049 | 0.062850114 | 7.60E-07    |
| cg05966978 37 | 10 | 11207437  | 0.33117169 | 0.563978028 | 0.647202436 | 3.59E-05    | 0.038327671 | 2.32E-08    |
| cg06223767 37 | 6  | 393616    | 0.19745887 | 0.42543624  | 0.568273864 | 0.004387658 | 0.197026637 | 4.29E-06    |
| cg06319475 37 | 8  | 145105829 | 0.20025257 | 0.459004558 | 0.607950418 | 0.00119891  | 0.12105156  | 1.22E-07    |
| cg06392169 37 | 6  | 391936    | 0.21707642 | 0.4782926   | 0.623024132 | 0.000727694 | 0.11420806  | 1.44E-07    |
| cg06611358 37 | 19 | 37464417  | 0.23743883 | 0.439464383 | 0.613484223 | 0.001076645 | 0.024453293 | 8.37E-09    |
| cg06750832 37 | 1  | 111217691 | 0.22437946 | 0.432035202 | 0.600178445 | 0.001162531 | 0.017384841 | 7.80E-11    |
| cg06970370 37 | 1  | 121261077 | 0.41841467 | 0.634441194 | 0.736875159 | 0.000257709 | 0.050626099 | 8.34E-09    |

|               |    |           |            |             |             |             |             |             |
|---------------|----|-----------|------------|-------------|-------------|-------------|-------------|-------------|
| cg07080358 37 | 2  | 68546507  | 0.17231872 | 0.447836992 | 0.587517359 | 0.000282088 | 0.111095224 | 5.36E-09    |
| cg07208853 37 | 1  | 200005219 | 0.26654876 | 0.522160978 | 0.68638435  | 0.000162658 | 0.012673314 | 1.70E-10    |
| cg07594636 37 | 2  | 68547088  | 0.19553145 | 0.438786299 | 0.540901895 | 0.001289591 | 0.298849976 | 3.28E-06    |
| cg07642043 37 | 16 | 10276674  | 0.24798141 | 0.4605715   | 0.65565925  | 0.001397695 | 0.010842146 | 8.63E-10    |
| cg07655636 37 | 19 | 22034418  | 0.10441059 | 0.317618068 | 0.533180755 | 0.001208299 | 0.013191896 | 2.32E-09    |
| cg07794500 37 | 1  | 121261369 | 0.10319584 | 0.338501566 | 0.524292668 | 0.000246717 | 0.012612491 | 7.75E-11    |
| cg07808555 37 | 1  | 111217712 | 0.20697252 | 0.446212363 | 0.668583259 | 0.001237626 | 0.011894518 | 1.42E-10    |
| cg07900968 37 | 19 | 36909326  | 0.11971934 | 0.333334221 | 0.534461161 | 0.010959468 | 0.066482339 | 1.16E-06    |
| cg07926895 37 | 1  | 200005833 | 0.22162016 | 0.449776522 | 0.575958259 | 0.000104459 | 0.037871047 | 1.97E-11    |
| cg07981013 37 | 7  | 156795767 | 0.40524431 | 0.619073344 | 0.645985473 | 1.53E-05    | 0.675611608 | 1.11E-05    |
| cg08002883 37 | 3  | 192127457 | 0.22483468 | 0.441932864 | 0.648836123 | 0.005512088 | 0.015235834 | 1.33E-09    |
| cg08430489 37 | 7  | 142494953 | 0.11813035 | 0.338193283 | 0.48858393  | 0.004169911 | 0.176474035 | 1.20E-05    |
| cg08516516 37 | 5  | 115152492 | 0.23909601 | 0.446184928 | 0.573900282 | 0.001018973 | 0.078599784 | 4.97E-08    |
| cg08567279 37 | 13 | 53313529  | 0.16682558 | 0.397564093 | 0.53051646  | 0.000769091 | 0.214394127 | 2.94E-05    |
| cg08682544 37 | 16 | 66638438  | 0.10423291 | 0.316370249 | 0.492182223 | 0.004263074 | 0.088408107 | 2.43E-06    |
| cg08684639 37 | 4  | 176987313 | 0.07221805 | 0.295100084 | 0.518040873 | 0.003888031 | 0.03238548  | 1.20E-07    |
| cg08738570 37 | 1  | 1475265   | 0.41814081 | 0.650283056 | 0.793225786 | 9.02E-05    | 0.018956077 | 5.53E-11    |
| cg08864645 37 | 6  | 33943929  | 0.33360094 | 0.552362239 | 0.602552964 | 0.000149779 | 0.539660217 | 6.96E-06    |
| cg09087503 37 | 7  | 127672473 | 0.14065394 | 0.458066792 | 0.563698418 | 1.12E-05    | 0.039550764 | 1.06E-10    |
| cg09179211 37 | 21 | 42689051  | 0.42713669 | 0.670851611 | 0.701057123 | 3.71E-06    | 0.565822304 | 6.83E-09    |
| cg09241022 37 | 14 | 29254530  | 0.23672459 | 0.457097265 | 0.706799095 | 0.006909574 | 0.013037309 | 9.26E-10    |
| cg09257332 37 | 19 | 36909913  | 0.15465059 | 0.358610443 | 0.523989776 | 0.005840896 | 0.107216149 | 2.67E-06    |
| cg09296001 37 | 7  | 127672564 | 0.11960398 | 0.486328606 | 0.676162732 | 1.73E-05    | 0.01132836  | 9.16E-12    |
| cg09493063 37 | 7  | 142494985 | 0.17287638 | 0.433485374 | 0.5905749   | 0.000403188 | 0.089282317 | 7.56E-08    |
| cg09731694 37 | 9  | 132383003 | 0.31731967 | 0.549861672 | 0.697157327 | 6.31E-05    | 0.013329171 | 6.40E-12    |
| cg10580144 37 | 2  | 61372316  | 0.26211866 | 0.462415078 | 0.621634555 | 0.0006913   | 0.033319568 | 1.20E-08    |
| cg10640119 37 | 9  | 132383095 | 0.18027348 | 0.386498772 | 0.440187277 | 3.14E-05    | 0.335376832 | 6.09E-09    |
| cg10967023 37 | 12 | 115134886 | 0.26662428 | 0.477118411 | 0.662906236 | 0.000455678 | 0.010688304 | 1.75E-10    |
| cg10972873 37 | 1  | 200007592 | 0.1915096  | 0.482346189 | 0.613956827 | 2.18E-05    | 0.037605026 | 9.16E-12    |
| cg11017065 37 | 11 | 128564874 | 0.13089261 | 0.40331417  | 0.502189123 | 0.008609173 | 0.539373465 | 0.000455365 |

|               |    |           |            |             |             |             |             |             |
|---------------|----|-----------|------------|-------------|-------------|-------------|-------------|-------------|
| cg11167100 37 | 15 | 83776269  | 0.15124129 | 0.376860035 | 0.565246468 | 0.000729525 | 0.014732419 | 2.84E-11    |
| cg11213520 37 | 12 | 113901529 | 0.29873246 | 0.504726061 | 0.697847714 | 0.011895421 | 0.042019711 | 4.18E-09    |
| cg11267630 37 | 17 | 46811527  | 0.168021   | 0.372076871 | 0.245838204 | 0.014284331 | 0.325324399 | 0.374715445 |
| cg11328303 37 | 10 | 26505440  | 0.34449526 | 0.562013717 | 0.717911468 | 0.00162688  | 0.028249755 | 1.05E-09    |
| cg11573679 37 | 2  | 68546467  | 0.19505713 | 0.464358673 | 0.608779686 | 0.000602901 | 0.141005497 | 8.89E-08    |
| cg11585893 37 | 12 | 54447430  | 0.32405063 | 0.532029239 | 0.480332877 | 0.001844368 | 0.584534459 | 0.002128927 |
| cg11595545 37 | 1  | 111217497 | 0.2776204  | 0.515101217 | 0.655121436 | 0.000747477 | 0.035863616 | 3.41E-09    |
| cg11646192 37 | 4  | 75230615  | 0.34960866 | 0.557918194 | 0.592499577 | 1.52E-05    | 0.440035744 | 3.11E-07    |
| cg11739675 37 | 12 | 104852151 | 0.09531603 | 0.312625525 | 0.453399855 | 0.001501001 | 0.167645331 | 9.90E-06    |
| cg12374721 37 | 17 | 46799640  | 0.24173976 | 0.450211318 | 0.256488038 | 0.022525306 | 0.134678458 | 0.871702093 |
| cg12628196 37 | 7  | 127672458 | 0.15193655 | 0.501270849 | 0.651546045 | 1.34E-05    | 0.018479175 | 9.16E-12    |
| cg12652174 37 | 7  | 142494773 | 0.15590702 | 0.360770199 | 0.51864221  | 0.00954251  | 0.144834836 | 9.24E-06    |
| cg12863545 37 | 17 | 8869136   | 0.13106992 | 0.343828784 | 0.448385975 | 0.000704801 | 0.230257035 | 3.20E-06    |
| cg12973591 37 | 7  | 93519473  | 0.13710771 | 0.342440626 | 0.555263036 | 0.001171484 | 0.014445413 | 1.07E-08    |
| cg13273396 37 | 12 | 81471867  | 0.40574718 | 0.609897189 | 0.6926126   | 0.000424142 | 0.254338652 | 1.14E-06    |
| cg13405887 37 | 9  | 132382812 | 0.23655422 | 0.518834067 | 0.636290527 | 1.92E-05    | 0.02609117  | 3.31E-11    |
| cg13484546 37 | 1  | 16084939  | 0.27112703 | 0.546401128 | 0.696715418 | 6.61E-05    | 0.054760235 | 2.22E-09    |
| cg13702005 37 | 12 | 103889789 | 0.22617616 | 0.430759778 | 0.577339564 | 0.000421791 | 0.037413136 | 6.80E-09    |
| cg13895235 37 | 7  | 752292    | 0.28076957 | 0.522974644 | 0.7541878   | 0.00384676  | 0.016638384 | 1.38E-10    |
| cg14015706 37 | 9  | 132382433 | 0.14041415 | 0.496310872 | 0.669601223 | 1.46E-05    | 0.015271792 | 4.72E-12    |
| cg14443519 37 | 6  | 29760410  | 0.12135186 | 0.346379128 | 0.5130659   | 0.000814657 | 0.039915164 | 1.22E-08    |
| cg14470895 37 | 5  | 115152431 | 0.23202586 | 0.438701777 | 0.587899191 | 0.001797933 | 0.064930952 | 1.60E-07    |
| cg14515424 37 | 2  | 97193524  | 0.26217152 | 0.48441905  | 0.617911059 | 0.000389318 | 0.061858791 | 2.41E-09    |
| cg14531560 37 | 1  | 16085371  | 0.17749578 | 0.384927916 | 0.499278786 | 0.000180783 | 0.070232982 | 3.75E-09    |
| cg14676825 37 | 17 | 27038886  | 0.21555884 | 0.416171528 | 0.529094294 | 0.002189807 | 0.155393155 | 7.95E-07    |
| cg15313459 37 | 2  | 68547052  | 0.27302266 | 0.506919083 | 0.624938191 | 0.00062193  | 0.12371293  | 1.58E-08    |
| cg15760257 37 | 17 | 26699169  | 0.09469316 | 0.300719943 | 0.428823386 | 0.002920958 | 0.21410497  | 9.56E-06    |
| cg15929698 37 | 7  | 24323792  | 0.28823611 | 0.506507389 | 0.660767768 | 0.000909298 | 0.038755244 | 6.87E-10    |
| cg16283362 37 | 7  | 156795914 | 0.39542097 | 0.681558561 | 0.70313515  | 2.62E-05    | 0.830386619 | 8.32E-05    |
| cg16306898 37 | 1  | 1475675   | 0.08378309 | 0.287352092 | 0.548531944 | 0.004801796 | 0.008718217 | 1.37E-09    |

|               |    |           |            |             |             |             |             |          |
|---------------|----|-----------|------------|-------------|-------------|-------------|-------------|----------|
| cg16328106 37 | 2  | 61372138  | 0.42593166 | 0.650445444 | 0.766956477 | 0.000436801 | 0.084647575 | 1.30E-08 |
| cg16335762 37 | 16 | 66637919  | 0.25767907 | 0.551577161 | 0.687751986 | 9.73E-05    | 0.072445234 | 9.08E-10 |
| cg16376000 37 | 3  | 192127330 | 0.1977144  | 0.433706533 | 0.637475205 | 0.001238895 | 0.012487491 | 4.91E-11 |
| cg16519300 37 | 1  | 16084830  | 0.34615247 | 0.557758456 | 0.679838223 | 0.00022071  | 0.083859179 | 6.57E-08 |
| cg16818993 37 | 10 | 7453471   | 0.12319822 | 0.357807609 | 0.496737362 | 0.002087463 | 0.185186315 | 3.15E-06 |
| cg16848116 37 | 19 | 57862627  | 0.10915421 | 0.320346518 | 0.505729096 | 0.001839052 | 0.054014676 | 6.57E-07 |
| cg16918989 37 | 17 | 8869213   | 0.14330585 | 0.371879237 | 0.509159732 | 0.002699492 | 0.223198376 | 2.62E-05 |
| cg16933229 37 | 4  | 111561352 | 0.29900199 | 0.503869439 | 0.6433803   | 0.002265024 | 0.074204209 | 1.80E-09 |
| cg16940012 37 | 5  | 174159564 | 0.34380108 | 0.563916339 | 0.679196955 | 0.000104649 | 0.061462955 | 2.93E-10 |
| cg16964348 37 | 7  | 24323799  | 0.22843381 | 0.532019886 | 0.697218914 | 0.000314299 | 0.069454823 | 7.19E-10 |
| cg16993043 37 | 1  | 200008026 | 0.18576853 | 0.404809789 | 0.541815682 | 0.00029003  | 0.062515195 | 1.69E-08 |
| cg17099397 37 | 1  | 108508185 | 0.2157719  | 0.421123528 | 0.541775714 | 0.00138503  | 0.209575782 | 1.20E-05 |
| cg17128947 37 | 4  | 779480    | 0.30317507 | 0.598843256 | 0.738379686 | 6.42E-05    | 0.083601599 | 3.54E-09 |
| cg17228900 37 | 6  | 391764    | 0.10086644 | 0.314322966 | 0.585962585 | 0.00810266  | 0.017659596 | 1.81E-07 |
| cg17301223 37 | 8  | 145106438 | 0.21589771 | 0.558372257 | 0.717536483 | 0.000529411 | 0.145729355 | 4.52E-08 |
| cg17338208 37 | 7  | 93520024  | 0.11281649 | 0.317955754 | 0.561411876 | 0.003433642 | 0.01123065  | 2.95E-09 |
| cg17394649 37 | 6  | 29760164  | 0.30998724 | 0.514208433 | 0.650893045 | 0.000163494 | 0.041285642 | 2.42E-08 |
| cg17418463 37 | 1  | 35395541  | 0.09753415 | 0.311559294 | 0.478673967 | 0.002631177 | 0.08478803  | 1.03E-06 |
| cg17651959 37 | 20 | 21498100  | 0.27121404 | 0.5118559   | 0.699027482 | 0.000768961 | 0.038850635 | 2.04E-08 |
| cg17698295 37 | 8  | 145106299 | 0.17974763 | 0.499737868 | 0.677240764 | 0.000643804 | 0.083023014 | 1.53E-08 |
| cg17853216 37 | 10 | 81002480  | 0.29387326 | 0.526592414 | 0.691552    | 0.001330294 | 0.021859693 | 1.03E-08 |
| cg17892556 37 | 19 | 12267464  | 0.18447788 | 0.425167174 | 0.539363618 | 0.00129357  | 0.285368842 | 1.20E-05 |
| cg17987112 37 | 5  | 174158654 | 0.26887041 | 0.567894911 | 0.712589064 | 2.40E-05    | 0.029731176 | 6.92E-12 |
| cg18110165 37 | 5  | 49736988  | 0.23066055 | 0.447511756 | 0.520510282 | 4.90E-05    | 0.142908484 | 2.33E-10 |
| cg18126097 37 | 1  | 200014673 | 0.35108931 | 0.583348967 | 0.752481505 | 0.000205295 | 0.011870629 | 2.30E-11 |
| cg18412834 37 | 20 | 61885291  | 0.13028249 | 0.342987363 | 0.584163317 | 0.00687043  | 0.017752436 | 5.54E-09 |
| cg18601167 37 | 7  | 752286    | 0.20045765 | 0.436683035 | 0.715815723 | 0.009388186 | 0.0122307   | 4.03E-10 |
| cg18638914 37 | 4  | 779568    | 0.13458443 | 0.362573881 | 0.563422922 | 0.001455331 | 0.037502727 | 1.25E-07 |
| cg18794404 37 | 10 | 22542024  | 0.19588244 | 0.400244149 | 0.60372107  | 0.014737974 | 0.043300788 | 3.73E-07 |
| cg18845377 37 | 7  | 156795892 | 0.16616357 | 0.4313026   | 0.498587564 | 9.41E-06    | 0.480093051 | 2.66E-05 |

|               |    |           |            |             |             |             |             |             |
|---------------|----|-----------|------------|-------------|-------------|-------------|-------------|-------------|
| cg18856388 37 | 5  | 1875886   | 0.28775304 | 0.517882422 | 0.707723314 | 0.001377434 | 0.020539188 | 8.72E-10    |
| cg19211077 37 | 19 | 21658001  | 0.26794163 | 0.476968567 | 0.686166395 | 0.00222849  | 0.010530037 | 9.79E-11    |
| cg19256731 37 | 20 | 1874527   | 0.4890894  | 0.709429189 | 0.766691545 | 2.61E-05    | 0.187733159 | 4.02E-08    |
| cg19602081 37 | 4  | 111553161 | 0.12267959 | 0.324632192 | 0.213142062 | 0.024239798 | 0.371977737 | 0.17908688  |
| cg20072171 37 | 3  | 62356962  | 0.32313188 | 0.532037894 | 0.690760891 | 0.003903988 | 0.081093118 | 2.82E-07    |
| cg20230721 37 | 7  | 93519855  | 0.19841991 | 0.406294992 | 0.673774695 | 0.003482302 | 0.00632457  | 1.04E-10    |
| cg20275528 37 | 17 | 75369484  | 0.22486749 | 0.469561817 | 0.645812177 | 0.001108948 | 0.018068934 | 1.79E-09    |
| cg20506184 37 | 10 | 7453329   | 0.15607953 | 0.405638556 | 0.595730313 | 0.000733362 | 0.056525135 | 3.02E-07    |
| cg21097881 37 | 7  | 24323939  | 0.27814463 | 0.48003987  | 0.591711932 | 0.001808281 | 0.106376689 | 1.59E-08    |
| cg21101720 37 | 17 | 27940509  | 0.12959639 | 0.346317797 | 0.52536108  | 0.002713125 | 0.057644253 | 1.09E-07    |
| cg21109167 37 | 3  | 37034084  | 0.30884542 | 0.516913494 | 0.499128399 | 2.48E-05    | 0.846225033 | 0.001202377 |
| cg21229570 37 | 12 | 115124768 | 0.36789011 | 0.597167339 | 0.698927241 | 0.000108591 | 0.16817136  | 1.06E-07    |
| cg21277995 37 | 6  | 393239    | 0.16510713 | 0.442939307 | 0.590890232 | 0.001392841 | 0.17833566  | 5.90E-07    |
| cg21583226 37 | 2  | 31360693  | 0.03941112 | 0.291918393 | 0.44265212  | 0.000812392 | 0.16921246  | 3.16E-06    |
| cg21621906 37 | 7  | 142494914 | 0.08387588 | 0.297790843 | 0.43538198  | 0.006621702 | 0.274107072 | 0.000149788 |
| cg21785034 37 | 7  | 142494439 | 0.27744545 | 0.480007233 | 0.652978895 | 0.005805822 | 0.059830601 | 3.54E-07    |
| cg22488797 37 | 5  | 134363324 | 0.31080755 | 0.529096983 | 0.685790845 | 0.000148575 | 0.011644187 | 1.64E-11    |
| cg22747076 37 | 12 | 54447873  | 0.16273474 | 0.386115763 | 0.63331148  | 0.009333099 | 0.033784685 | 2.47E-07    |
| cg22882523 37 | 8  | 145107012 | 0.28860428 | 0.530474328 | 0.604519914 | 0.000174336 | 0.196429152 | 4.29E-07    |
| cg23002761 37 | 1  | 16085642  | 0.23213171 | 0.433610653 | 0.555579925 | 0.000243236 | 0.058782133 | 5.23E-09    |
| cg23141355 37 | 3  | 44063593  | 0.1858334  | 0.399355892 | 0.590379123 | 0.007002546 | 0.032048243 | 1.50E-09    |
| cg23180938 37 | 5  | 115152485 | 0.30669453 | 0.520394339 | 0.652532795 | 0.000856829 | 0.048876802 | 4.47E-09    |
| cg23241781 37 | 14 | 70653964  | 0.28192342 | 0.50393235  | 0.650799795 | 0.00023633  | 0.030252572 | 3.19E-09    |
| cg23297477 37 | 16 | 66638293  | 0.14618709 | 0.445816128 | 0.633244426 | 0.000721243 | 0.054637713 | 4.27E-09    |
| cg23614791 37 | 12 | 81471754  | 0.22725169 | 0.504489091 | 0.594297345 | 9.24E-05    | 0.264964468 | 4.72E-08    |
| cg23663774 37 | 4  | 111555440 | 0.1940965  | 0.417480166 | 0.497803497 | 0.013101679 | 0.553387459 | 0.00016661  |
| cg23685155 37 | 12 | 54396440  | 0.2267097  | 0.460537056 | 0.413707702 | 0.000188812 | 0.608666131 | 0.00070961  |
| cg23927970 37 | 11 | 504933    | 0.3785112  | 0.581507511 | 0.654239836 | 0.000206189 | 0.351341961 | 5.28E-06    |
| cg23965931 37 | 4  | 184828386 | 0.20583214 | 0.446963956 | 0.450285145 | 0.000119059 | 0.976611774 | 7.92E-05    |
| cg23977631 37 | 2  | 100938799 | 0.0500622  | 0.264478068 | 0.427493988 | 0.00134448  | 0.063121914 | 9.34E-08    |

|               |    |           |            |             |             |             |             |             |
|---------------|----|-----------|------------|-------------|-------------|-------------|-------------|-------------|
| cg24171907 37 | 2  | 68546579  | 0.14914202 | 0.427902529 | 0.58113185  | 0.000329976 | 0.074527655 | 5.70E-09    |
| cg24242823 37 | 7  | 24323675  | 0.15220519 | 0.419191342 | 0.580060555 | 0.000227216 | 0.054904154 | 3.33E-09    |
| cg24334591 37 | 13 | 37005562  | 0.33770585 | 0.551817906 | 0.768858068 | 0.005763339 | 0.011581796 | 3.41E-09    |
| cg24724633 37 | 19 | 36909413  | 0.16374906 | 0.409758896 | 0.598540674 | 0.005468546 | 0.085364716 | 1.93E-07    |
| cg24799921 37 | 10 | 77168180  | 0.25247683 | 0.460714489 | 0.679979359 | 0.00807251  | 0.017135973 | 2.91E-08    |
| cg24857620 37 | 8  | 53851707  | 0.18948399 | 0.423688327 | 0.643781686 | 0.003089661 | 0.030693307 | 2.19E-08    |
| cg24885417 37 | 7  | 24323764  | 0.20644837 | 0.423838912 | 0.549854986 | 0.000584477 | 0.072987204 | 7.71E-09    |
| cg25200152 37 | 1  | 147790458 | 0.31490991 | 0.516403539 | 0.666488345 | 0.00463963  | 0.087053495 | 2.54E-07    |
| cg25209842 37 | 10 | 103536342 | 0.31100206 | 0.521462467 | 0.649740736 | 0.000282517 | 0.047555107 | 2.01E-09    |
| cg25223771 37 | 8  | 145105503 | 0.26538792 | 0.482063944 | 0.608795473 | 0.002199743 | 0.166703939 | 8.83E-07    |
| cg25358039 37 | 12 | 81471757  | 0.21840726 | 0.466764444 | 0.535818175 | 7.02E-05    | 0.361714952 | 1.42E-07    |
| cg25652029 37 | 2  | 182321786 | 0.26622392 | 0.488845633 | 0.678604982 | 0.000744622 | 0.011495101 | 3.44E-10    |
| cg25737323 37 | 2  | 29338100  | 0.3435614  | 0.54400485  | 0.692333405 | 0.002481309 | 0.035383537 | 1.63E-08    |
| cg25761326 37 | 10 | 11206792  | 0.36939478 | 0.586160006 | 0.674891786 | 4.21E-05    | 0.040485268 | 1.46E-08    |
| cg25832771 37 | 8  | 72756058  | 0.14874316 | 0.350615372 | 0.51421722  | 0.002341418 | 0.035667599 | 1.68E-08    |
| cg25840208 37 | 2  | 31457043  | 0.06924076 | 0.284220198 | 0.368918062 | 0.007393468 | 0.504799642 | 0.000318523 |
| cg25971727 37 | 12 | 81471533  | 0.11960814 | 0.331226627 | 0.4357716   | 0.000139544 | 0.168899219 | 5.24E-07    |
| cg26036626 37 | 1  | 16085597  | 0.26460909 | 0.568858889 | 0.71711015  | 6.69E-05    | 0.060557988 | 7.37E-10    |
| cg26107890 37 | 3  | 124860686 | 0.47352978 | 0.680593417 | 0.785735245 | 4.92E-05    | 0.010598622 | 3.00E-09    |
| cg26171871 37 | 7  | 156796011 | 0.30307987 | 0.570377317 | 0.543243115 | 9.12E-05    | 0.753393962 | 0.0008557   |
| cg26199906 37 | 8  | 145106246 | 0.22989506 | 0.461937456 | 0.611742764 | 0.000586303 | 0.051665177 | 2.13E-08    |
| cg26246807 37 | 19 | 58095659  | 0.37561466 | 0.597706644 | 0.758164927 | 0.001412268 | 0.018672059 | 4.89E-09    |
| cg26251325 37 | 5  | 54518745  | 0.19233364 | 0.427734239 | 0.600361759 | 0.000245109 | 0.032650371 | 1.15E-08    |
| cg26256223 37 | 8  | 145106582 | 0.19397929 | 0.491213063 | 0.629234711 | 0.000382574 | 0.145586962 | 4.91E-08    |
| cg26272220 37 | 12 | 81471884  | 0.30593378 | 0.534207867 | 0.622310707 | 0.000348025 | 0.247982834 | 2.59E-07    |
| cg26530758 37 | 8  | 41754060  | 0.36181951 | 0.561986728 | 0.726832173 | 0.005275407 | 0.062471324 | 6.16E-08    |
| cg26560414 37 | 16 | 66638433  | 0.10853241 | 0.326809853 | 0.533422231 | 0.004001557 | 0.046372404 | 7.78E-07    |
| cg26654807 37 | 10 | 81002218  | 0.36274442 | 0.586278106 | 0.703355064 | 0.001518356 | 0.053832238 | 3.28E-07    |
| cg26878816 37 | 10 | 7452598   | 0.10888183 | 0.376759237 | 0.533090574 | 0.000431883 | 0.147645742 | 2.49E-06    |
| cg26978668 37 | 10 | 7453452   | 0.13735535 | 0.358732524 | 0.491510505 | 0.000922558 | 0.117953075 | 2.53E-07    |



|               |    |           |            |             |             |             |             |             |
|---------------|----|-----------|------------|-------------|-------------|-------------|-------------|-------------|
| cg26998044 37 | 17 | 8869155   | 0.14502449 | 0.388268417 | 0.52828789  | 0.000774818 | 0.154987662 | 1.89E-06    |
| cg27659049 37 | 12 | 115173713 | 0.47022311 | 0.684768456 | 0.703127759 | 0.000230007 | 0.863564579 | 0.000376123 |

---

Table S2 Differentially methylated regions (DMRs) between low grade adenoma (LGA) and Normal samples

| Location | Gene     | CHR | MAPINFO                                                       | Number of sites | Designed Probes                                                                                    | Normal     | LGA        | HGA         | Different $\beta$ | P value  | Adjusted P value |
|----------|----------|-----|---------------------------------------------------------------|-----------------|----------------------------------------------------------------------------------------------------|------------|------------|-------------|-------------------|----------|------------------|
| TSS1500  | A4GNT    | 3   | 137851874/137852643/137851776                                 | 3               | cg18931888/cg19734045/cg23669440                                                                   | 0.58586656 | 0.41358386 | 0.304446464 | -0.1722827        | 9.43E-07 | 3.76E-05         |
| TSS1500  | ACSS3    | 12  | 81471419/81471311/81471533                                    | 3               | cg00354572/cg08314603/cg25971727                                                                   | 0.21885051 | 0.4004886  | 0.471809096 | 0.18163809        | 2.00E-06 | 5.51E-05         |
| TSS1500  | AGR2     | 7   | 16845331                                                      | 1               | cg12565635                                                                                         | 0.55886628 | 0.40800231 | 0.323608105 | -0.150864         | 2.62E-08 | 9.16E-06         |
| TSS1500  | APOBEC1  | 12  | 7819180                                                       | 1               | cg16879115                                                                                         | 0.65364044 | 0.46522647 | 0.339518605 | -0.188414         | 1.00E-07 | 1.34E-05         |
| TSS1500  | ARHGAP28 | 18  | 6833417                                                       | 1               | cg03026004                                                                                         | 0.53171601 | 0.34391694 | 0.202823204 | -0.1877991        | 1.25E-05 | 1.67E-04         |
| TSS1500  | AVIL     | 12  | 58211193/58210661/58210878/58210716                           | 4               | cg01424889/cg04046364/cg06317209/cg26620147                                                        | 0.54993057 | 0.39294288 | 0.316282894 | -0.1569877        | 8.42E-09 | 5.71E-06         |
| TSS1500  | BRF2     | 8   | 37707692/37708609/37708905                                    | 3               | cg19904653/cg20466478/cg22871204                                                                   | 0.46839186 | 0.31684988 | 0.205657763 | -0.151542         | 1.10E-06 | 4.11E-05         |
| TSS1500  | BSG      | 19  | 571107/571204/571744/571321/57116/571802/572309/571323/570458 | 9               | cg01532103/cg05622915/cg07513435/cg13578393/cg17522907/cg18341969/cg22431486/cg25660646/cg26529300 | 0.78931954 | 0.60699698 | 0.594050391 | -0.1823226        | 8.82E-07 | 3.70E-05         |
| TSS1500  | C16orf89 | 16  | 5117565/5116674                                               | 2               | cg02878222/cg27664407                                                                              | 0.54217156 | 0.38745737 | 0.294618095 | -0.1547142        | 3.10E-06 | 7.17E-05         |
| TSS1500  | C20orf79 | 20  | 18794097/18793817                                             | 2               | cg08567760/cg08716736                                                                              | 0.69846479 | 0.54324435 | 0.404466973 | -0.1552204        | 3.75E-05 | 3.44E-04         |
| TSS1500  | C7orf16  | 7   | 31726494/31725973/31725748                                    | 3               | cg01001101/cg04866380/cg23348723                                                                   | 0.53779831 | 0.38658703 | 0.287442248 | -0.1512113        | 4.10E-07 | 2.44E-05         |
| TSS1500  | CCDC50   | 3   | 191046547/191046380                                           | 2               | cg19066520/cg25342125                                                                              | 0.60527054 | 0.41069312 | 0.355004173 | -0.1945774        | 1.08E-07 | 1.39E-05         |
| TSS1500  | CCL8     | 17  | 32645753/32645806/32645748                                    | 3               | cg00038857/cg04656009/cg27000831                                                                   | 0.60098327 | 0.43562701 | 0.316505959 | -0.1653563        | 6.09E-06 | 1.04E-04         |
| TSS1500  | CD207    | 2   | 71063282/71064086                                             | 2               | cg08989942/cg26946836                                                                              | 0.62314848 | 0.46427469 | 0.335575727 | -0.1588738        | 1.06E-05 | 1.48E-04         |
| TSS1500  | CDX2     | 13  | 28544814/28543520/28544592/28544760                           | 4               | cg01499197/cg02055963/cg07984133/cg16201038                                                        | 0.44334652 | 0.28001494 | 0.431752602 | -0.1633316        | 7.46E-04 | 3.25E-03         |
| TSS1500  | CHST15   | 10  | 125806958/125807504/125807047                                 | 3               | cg06034255/cg09595290/cg16449489                                                                   | 0.71921853 | 0.53196769 | 0.380170368 | -0.1872508        | 6.30E-07 | 3.11E-05         |
| TSS1500  | CMTM3    | 16  | 66638320/66637927/66637919/66638293/66638210                  | 5               | cg00355909/cg01434608/cg16335762/cg23297477/cg26658728                                             | 0.17331806 | 0.47040298 | 0.643669665 | 0.29708492        | 9.33E-06 | 1.36E-04         |

|         |                    |    |                                                                   |   |                                                                               |            |            |             |            |          |            |
|---------|--------------------|----|-------------------------------------------------------------------|---|-------------------------------------------------------------------------------|------------|------------|-------------|------------|----------|------------|
| TSS1500 | CNRIP1             | 2  | 68548060/6854765<br>5                                             | 2 | cg08174244/cg21216<br>118                                                     | 0.70666885 | 0.54521699 | 0.394946445 | -0.1614519 | 3.51E-06 | 7.68E-05   |
| TSS1500 | COQ3               | 6  | 99842368/9984235<br>1/99842353                                    | 3 | cg03514381/cg18751<br>133/cg24831427                                          | 0.59824407 | 0.44292576 | 0.349923117 | -0.1553183 | 3.28E-06 | 7.37E-05   |
| TSS1500 | CP110              | 16 | 19533815/1953485<br>2                                             | 2 | cg06784594/cg27259<br>633                                                     | 0.70235553 | 0.55044527 | 0.462975068 | -0.1519103 | 1.28E-06 | 4.31E-05   |
| TSS1500 | DKFZP686I15<br>217 | 6  | 2986848/2987708/<br>2986843                                       | 3 | cg00184279/cg01454<br>349/cg12335476                                          | 0.66529225 | 0.50722289 | 0.410613164 | -0.1580694 | 2.03E-08 | 8.01E-06   |
| TSS1500 | DTX1               | 12 | 113495386/113494<br>422/113494429/11<br>3495037                   | 4 | cg04562491/cg10670<br>310/cg11939071/cg2<br>2685245                           | 0.28981724 | 0.44424425 | 0.548626283 | 0.15442701 | 3.81E-04 | 1.90E-03   |
| TSS1500 | DYDC1              | 10 | 82117089/8211711<br>9/82117257                                    | 3 | cg03701427/cg06411<br>551/cg17703212                                          | 0.34139758 | 0.54391812 | 0.676124495 | 0.20252054 | 3.45E-05 | 3.26E-04   |
| TSS1500 | EID3               | 12 | 104697193/104697<br>220/104697224                                 | 3 | cg01857475/cg09884<br>423/cg10572274                                          | 0.24794737 | 0.42128987 | 0.607087922 | 0.1733425  | 9.39E-04 | 3.90E-03   |
| TSS1500 | EVI2B              | 17 | 29641333                                                          | 1 | cg05109049                                                                    | 0.36786521 | 0.14928822 | 0.121072471 | -0.218577  | 1.33E-05 | 0.00017417 |
| TSS1500 | FAM38B             | 18 | 11149841/1114943<br>5/11149470/11149<br>763/11149068/111<br>50043 | 6 | cg02664349/cg03117<br>976/cg03686593/cg0<br>6510438/cg10567810<br>/cg12673429 | 0.34106711 | 0.4923372  | 0.61288286  | 0.15127009 | 6.35E-04 | 2.84E-03   |
| TSS1500 | FAM55B             | 11 | 114548759/114548<br>872                                           | 2 | cg07340922/cg19113<br>081                                                     | 0.64500476 | 0.48287508 | 0.366004345 | -0.1621297 | 5.60E-07 | 2.90E-05   |
| TSS1500 | FAM75A6            | 9  | 43631161                                                          | 1 | cg10034990                                                                    | 0.53034953 | 0.37100266 | 0.276844323 | -0.1593469 | 1.17E-06 | 4.19E-05   |
| TSS1500 | FKBPL              | 6  | 32099450/3209956<br>4/32098344/32098<br>346                       | 4 | cg03514937/cg07790<br>778/cg08577517/cg1<br>6437896                           | 0.69236295 | 0.52954162 | 0.446631627 | -0.1628213 | 3.98E-06 | 8.24E-05   |
| TSS1500 | FLG2               | 1  | 152333922/152333<br>423/152333596                                 | 3 | cg03439811/cg03957<br>898/cg23812489                                          | 0.48509233 | 0.33422547 | 0.227919445 | -0.1508669 | 3.06E-04 | 1.60E-03   |
| TSS1500 | GABRR3             | 3  | 97754720                                                          | 1 | cg11726229                                                                    | 0.68051329 | 0.52752134 | 0.427380682 | -0.1529919 | 3.30E-05 | 3.17E-04   |
| TSS1500 | GDE1               | 16 | 19533815/1953485<br>2                                             | 2 | cg06784594/cg27259<br>633                                                     | 0.70235553 | 0.55044527 | 0.462975068 | -0.1519103 | 1.28E-06 | 4.31E-05   |
| TSS1500 | GHITM              | 10 | 85898700/8589864<br>9                                             | 2 | cg12706330/cg25783<br>892                                                     | 0.50817092 | 0.3533819  | 0.258773808 | -0.154789  | 8.16E-06 | 1.25E-04   |
| TSS1500 | GIP                | 17 | 47046292                                                          | 1 | cg20551517                                                                    | 0.83768907 | 0.65942629 | 0.564808618 | -0.1782628 | 1.01E-06 | 3.92E-05   |
| TSS1500 | HDGFL1             | 6  | 22568625/2256827<br>8                                             | 2 | cg20209681/cg21898<br>884                                                     | 0.59318242 | 0.4328928  | 0.344404064 | -0.1602896 | 7.16E-05 | 5.41E-04   |
| TSS1500 | HS3ST5             | 6  | 114385144/114384<br>871/114384629                                 | 3 | cg06694119/cg18192<br>491/cg23968650                                          | 0.55737003 | 0.39628769 | 0.334053877 | -0.1610823 | 1.42E-05 | 1.82E-04   |
| TSS1500 | IL17A              | 6  | 52050133/5205059<br>7                                             | 2 | cg09582880/cg11924<br>517                                                     | 0.67080109 | 0.52038039 | 0.348856723 | -0.1504207 | 4.22E-04 | 2.06E-03   |
| TSS1500 | KHDC1L             | 6  | 73935584/7393567<br>6                                             | 2 | cg00732807/cg10190<br>334                                                     | 0.71055764 | 0.55352034 | 0.403592364 | -0.1570373 | 7.65E-05 | 5.66E-04   |

|         |              |    |                                                             |   |                                                                   |            |            |             |            |          |          |
|---------|--------------|----|-------------------------------------------------------------|---|-------------------------------------------------------------------|------------|------------|-------------|------------|----------|----------|
| TSS1500 | KRTAP19-8    | 21 | 32412191                                                    | 1 | cg06790305                                                        | 0.64860721 | 0.48350282 | 0.346723436 | -0.1651044 | 4.91E-06 | 9.23E-05 |
| TSS1500 | KRTAP6-2     | 21 | 31972533/31972672                                           | 2 | cg05572621/cg07945323                                             | 0.62244242 | 0.47091749 | 0.362859402 | -0.1515249 | 2.54E-05 | 2.68E-04 |
| TSS1500 | LOC100133892 | 12 | 27925367                                                    | 1 | cg04279139                                                        | 0.45117092 | 0.29900699 | 0.241501863 | -0.1521639 | 2.80E-08 | 9.16E-06 |
| TSS1500 | LOC149134    | 1  | 246952508/246952362/246952118/246952495/246952215/246952048 | 6 | cg03340119/cg03596016/cg05314024/cg08535928/cg15176829/cg26898024 | 0.44164432 | 0.59378095 | 0.640010458 | 0.15213663 | 9.17E-07 | 3.73E-05 |
| TSS1500 | LOC285627    | 5  | 158894390/158894440/158893488                               | 3 | cg07829289/cg16338178/cg19017803                                  | 0.75000719 | 0.52088019 | 0.426324782 | -0.229127  | 3.04E-09 | 5.21E-06 |
| TSS1500 | LONP2        | 16 | 48277879/48277559                                           | 2 | cg03354717/cg09539739                                             | 0.59426907 | 0.44363838 | 0.358753823 | -0.1506307 | 8.20E-06 | 1.25E-04 |
| TSS1500 | LRRC4        | 7  | 127672235/127672473/127672458/127672169/127672152           | 5 | cg04153784/cg09087503/cg12628196/cg15087147/cg275735912           | 0.08853242 | 0.26445421 | 0.408407066 | 0.17592179 | 6.50E-07 | 3.16E-05 |
| TSS1500 | LRRC55       | 11 | 56948018/56947754/56948015                                  | 3 | cg03717588/cg11751645/cg24458609                                  | 0.23524251 | 0.40174317 | 0.461201923 | 0.16650066 | 8.17E-04 | 3.50E-03 |
| TSS1500 | MIR135B      | 1  | 205418278/205418410                                         | 2 | cg02520707/cg13061767                                             | 0.72598226 | 0.55068704 | 0.453863557 | -0.1752952 | 2.41E-07 | 1.96E-05 |
| TSS1500 | MRGPRD       | 11 | 68748907/68749124                                           | 2 | cg11903239/cg20791323                                             | 0.62277544 | 0.44366822 | 0.358181995 | -0.1791072 | 4.89E-07 | 2.72E-05 |
| TSS1500 | MUC13        | 3  | 124654885                                                   | 1 | cg14497879                                                        | 0.62254475 | 0.46971605 | 0.371612186 | -0.1528287 | 3.25E-07 | 2.24E-05 |
| TSS1500 | MYCT1        | 6  | 153018721                                                   | 1 | cg02830467                                                        | 0.61936345 | 0.46878502 | 0.323156964 | -0.1505784 | 1.26E-04 | 8.16E-04 |
| TSS1500 | NCRNA00157   | 21 | 19258310                                                    | 1 | cg26060835                                                        | 0.50022788 | 0.34604623 | 0.238001077 | -0.1541816 | 8.55E-06 | 1.28E-04 |
| TSS1500 | NIPSNAP1     | 22 | 29977949/29977677/29978158/29977742                         | 4 | cg00266865/cg00939432/cg08492625/cg13797031                       | 0.69214889 | 0.53306889 | 0.442208673 | -0.15908   | 4.32E-06 | 8.63E-05 |
| TSS1500 | NPBWR1       | 8  | 53852101/53851613/53852184/53852030/53851707/53851156       | 6 | cg02115041/cg07629017/cg15531403/cg16330450/cg24857620/cg26205771 | 0.25370952 | 0.4133378  | 0.606035915 | 0.15962828 | 9.74E-04 | 4.02E-03 |
| TSS1500 | NPY          | 7  | 24323128/24323559/24323261                                  | 3 | cg01050885/cg05158615/cg18106668                                  | 0.34957567 | 0.50974646 | 0.621323027 | 0.16017079 | 2.36E-05 | 2.55E-04 |
| TSS1500 | OC90         | 8  | 133072665/133072043/133072873/133072269                     | 4 | cg02759725/cg21594839/cg23399286/cg25626375                       | 0.49354095 | 0.33971764 | 0.227361109 | -0.1538233 | 2.04E-07 | 1.87E-05 |
| TSS1500 | OR56A1       | 11 | 6049729                                                     | 1 | cg18512262                                                        | 0.57736578 | 0.41692918 | 0.255862718 | -0.1604366 | 3.09E-05 | 3.03E-04 |
| TSS1500 | OR56A3       | 11 | 5967520                                                     | 1 | cg25451456                                                        | 0.61033697 | 0.45474864 | 0.318152514 | -0.1555883 | 2.21E-06 | 5.89E-05 |
| TSS1500 | OR5H15       | 3  | 97886467/97886603                                           | 2 | cg01495831/cg03507018                                             | 0.5079947  | 0.33962278 | 0.22202145  | -0.1683719 | 1.72E-06 | 5.14E-05 |
| TSS1500 | OR5T3        | 11 | 56018532                                                    | 1 | cg14284630                                                        | 0.55136269 | 0.35941318 | 0.227832333 | -0.1919495 | 3.20E-06 | 7.27E-05 |

|         |           |    |                               |   |                                  |            |            |             |            |          |          |
|---------|-----------|----|-------------------------------|---|----------------------------------|------------|------------|-------------|------------|----------|----------|
| TSS1500 | OR8H1     | 11 | 56059643                      | 1 | cg22629065                       | 0.40095448 | 0.23084966 | 0.166024259 | -0.1701048 | 1.49E-06 | 4.76E-05 |
| TSS1500 | PI3       | 20 | 43802992/43803224             | 2 | cg02733351/cg19931348            | 0.54707724 | 0.39662087 | 0.291040902 | -0.1504564 | 6.53E-08 | 1.12E-05 |
| TSS1500 | PIGB      | 15 | 55610624                      | 1 | cg19991916                       | 0.88449073 | 0.62599462 | 0.479371295 | -0.2584961 | 1.45E-06 | 4.71E-05 |
| TSS1500 | PLIN1     | 15 | 90223301/90224098/90223712    | 3 | cg01348757/cg08749443/cg11526413 | 0.67200997 | 0.51477628 | 0.43185497  | -0.1572337 | 7.13E-09 | 5.71E-06 |
| TSS1500 | POLD3     | 11 | 74302893/74303294/74303012    | 3 | cg01173485/cg08923614/cg26885816 | 0.67833687 | 0.51232671 | 0.399130685 | -0.1660102 | 5.47E-07 | 2.88E-05 |
| TSS1500 | POM121L12 | 7  | 53102694/53102721             | 2 | cg12333737/cg20170989            | 0.42947934 | 0.27930117 | 0.187995841 | -0.1501782 | 9.58E-06 | 1.38E-04 |
| TSS1500 | PPP4R2    | 3  | 73045556/73045440/73045686    | 3 | cg03847932/cg06051312/cg20540428 | 0.79815772 | 0.58513543 | 0.506348109 | -0.2130223 | 1.14E-03 | 4.53E-03 |
| TSS1500 | PRB2      | 12 | 11548867/11549192/11549555    | 3 | cg20480899/cg23372297/cg24891312 | 0.51697371 | 0.33488602 | 0.339073968 | -0.1820877 | 1.20E-05 | 1.62E-04 |
| TSS1500 | PRSS1     | 7  | 142456124                     | 1 | cg12878228                       | 0.61023168 | 0.44369722 | 0.330479082 | -0.1665345 | 3.87E-06 | 8.08E-05 |
| TSS1500 | PUM2      | 2  | 20527635/20527677/20527833    | 3 | cg01888166/cg08659707/cg22528172 | 0.82310104 | 0.66700006 | 0.617046847 | -0.156101  | 5.60E-07 | 2.90E-05 |
| TSS1500 | RASAL1    | 12 | 113574276/113574368/113575128 | 3 | cg08865522/cg16890739/cg24109790 | 0.55663769 | 0.3944711  | 0.306957808 | -0.1621666 | 1.13E-08 | 6.92E-06 |
| TSS1500 | RFTN2     | 2  | 198541655/198541772           | 2 | cg00826638/cg22387019            | 0.72952394 | 0.55098158 | 0.404589005 | -0.1785424 | 2.14E-05 | 2.39E-04 |
| TSS1500 | SIRPG     | 20 | 1639325/1639816/1639250       | 3 | cg11061975/cg13408605/cg23295754 | 0.70264101 | 0.50884555 | 0.339862545 | -0.1937955 | 3.03E-06 | 7.09E-05 |
| TSS1500 | SLC17A2   | 6  | 25931205/25931659/25931557    | 3 | cg01936555/cg20765441/cg24163360 | 0.6328762  | 0.46542842 | 0.373585605 | -0.1674478 | 1.53E-07 | 1.55E-05 |
| TSS1500 | SLC22A24  | 11 | 62912823                      | 1 | cg04426607                       | 0.67878832 | 0.51637331 | 0.407864932 | -0.162415  | 7.58E-05 | 5.63E-04 |
| TSS1500 | SLC35B4   | 7  | 134003124/134002145/134002209 | 3 | cg02659138/cg02820759/cg27581047 | 0.71033233 | 0.54311664 | 0.410342268 | -0.1672157 | 4.93E-07 | 2.72E-05 |
| TSS1500 | SNORA80   | 21 | 33750733/33749986             | 2 | cg09199848/cg09516696            | 0.79011717 | 0.63831289 | 0.608907745 | -0.1518043 | 1.31E-06 | 4.35E-05 |
| TSS1500 | SNORD87   | 8  | 67835853/67835351             | 2 | cg00640314/cg20217649            | 0.65718307 | 0.50143899 | 0.424463568 | -0.1557441 | 4.93E-05 | 4.14E-04 |
| TSS1500 | SPAG11B   | 8  | 7311130                       | 1 | cg14600420                       | 0.61582796 | 0.44269327 | 0.288175909 | -0.1731347 | 9.15E-06 | 1.34E-04 |
| TSS1500 | STK38     | 6  | 36515676/36515856             | 2 | cg02964385/cg23670203            | 0.5986102  | 0.44351593 | 0.373382268 | -0.1550943 | 1.19E-07 | 1.42E-05 |
| TSS1500 | TCN1      | 11 | 59634276                      | 1 | cg03928812                       | 0.50406189 | 0.33864056 | 0.238165301 | -0.1654213 | 1.09E-04 | 7.35E-04 |
| TSS1500 | TMEM200A  | 6  | 130757762                     | 1 | cg26931050                       | 0.74042799 | 0.58357244 | 0.493609582 | -0.1568556 | 2.27E-05 | 2.50E-04 |
| TSS1500 | TSPAN12   | 7  | 120498729/120499546           | 2 | cg22032706/cg23627038            | 0.61816603 | 0.46006451 | 0.394421307 | -0.1581015 | 1.15E-06 | 4.19E-05 |

|         |          |    |                                                                         |   |                                                                               |            |            |             |            |          |          |
|---------|----------|----|-------------------------------------------------------------------------|---|-------------------------------------------------------------------------------|------------|------------|-------------|------------|----------|----------|
| TSS1500 | UNC5CL   | 6  | 41007485/4100769<br>2/41007450/41007<br>522                             | 4 | cg15849648/cg17826<br>424/cg19175193/cg2<br>2346765                           | 0.72997075 | 0.56641271 | 0.438502102 | -0.163558  | 7.48E-07 | 3.35E-05 |
| TSS1500 | YIPF7    | 4  | 44654206                                                                | 1 | cg03815116                                                                    | 0.65073397 | 0.49411667 | 0.3368489   | -0.1566173 | 8.52E-05 | 6.11E-04 |
| TSS1500 | ZNF484   | 9  | 95640659                                                                | 1 | cg14646548                                                                    | 0.67635967 | 0.51935911 | 0.425553664 | -0.1570006 | 2.67E-07 | 2.07E-05 |
| TSS1500 | ZNF543   | 19 | 57831632/5783154<br>4/57831549/57831<br>662                             | 4 | cg00846300/cg14383<br>655/cg14603375/cg1<br>9533530                           | 0.09692006 | 0.26803743 | 0.374851989 | 0.17111737 | 1.73E-02 | 4.37E-02 |
| TSS1500 | ZNF667   | 19 | 56989102/5698954<br>3/56989812/56989<br>740                             | 4 | cg03289872/cg08063<br>125/cg21287936/cg2<br>4411929                           | 0.41428735 | 0.56680469 | 0.724532957 | 0.15251734 | 8.89E-04 | 3.74E-03 |
| TSS1500 | ZP4      | 1  | 238055429/238054<br>569                                                 | 2 | cg03673470/cg26810<br>908                                                     | 0.66332982 | 0.50223756 | 0.392643039 | -0.1610923 | 1.03E-05 | 1.45E-04 |
| TSS1500 | ZPBP     | 7  | 50133212/5013313<br>1/50133100                                          | 3 | cg00303745/cg09921<br>682/cg10349880                                          | 0.84136324 | 0.669956   | 0.48186017  | -0.1714072 | 9.92E-06 | 1.41E-04 |
| TSS200  | ACAN     | 15 | 89346629                                                                | 1 | cg16968596                                                                    | 0.20700132 | 0.40183949 | 0.631561205 | 0.19483817 | 6.70E-03 | 3.68E-02 |
| TSS200  | ACSS3    | 12 | 81471678/8147164<br>9/81471754/81471<br>757                             | 4 | cg11659501/cg21754<br>400/cg23614791/cg2<br>5358039                           | 0.28644777 | 0.49718931 | 0.572053364 | 0.21074154 | 3.31E-06 | 1.54E-04 |
| TSS200  | APBB1IP  | 10 | 26727173/2672726<br>1/26727069/26727<br>246/26727195                    | 5 | cg06157318/cg06535<br>993/cg14022711/cg2<br>6241806/cg27303981                | 0.23712799 | 0.39955754 | 0.505817762 | 0.16242955 | 1.56E-05 | 3.85E-04 |
| TSS200  | BPIL3    | 20 | 31619420                                                                | 1 | cg25345102                                                                    | 0.68629173 | 0.52654817 | 0.469432586 | -0.1597436 | 4.48E-06 | 1.83E-04 |
| TSS200  | C10orf90 | 10 | 128210076/128210<br>036                                                 | 2 | cg09621603/cg10005<br>270                                                     | 0.60503916 | 0.43117819 | 0.292599823 | -0.173861  | 8.73E-08 | 3.44E-05 |
| TSS200  | C12orf42 | 12 | 103889798/103889<br>903/103889784/10<br>3889789/10388992<br>8/103889772 | 6 | cg03882242/cg06664<br>258/cg11342468/cg1<br>3702005/cg14380586<br>/cg26381364 | 0.23822222 | 0.4112333  | 0.54528253  | 0.17301108 | 8.63E-05 | 1.28E-03 |
| TSS200  | C14orf48 | 14 | 94463488                                                                | 1 | cg16506185                                                                    | 0.69540914 | 0.52983259 | 0.4340211   | -0.1655765 | 7.44E-06 | 2.41E-04 |
| TSS200  | C17orf73 | 17 | 48845064/4884505<br>2/48845009                                          | 3 | cg07443932/cg12235<br>260/cg25518968                                          | 0.72978819 | 0.56321029 | 0.471729965 | -0.1665779 | 1.30E-05 | 3.46E-04 |
| TSS200  | C1orf14  | 1  | 182922705/182922<br>593/182922582                                       | 3 | cg02721693/cg02925<br>590/cg22237670                                          | 0.43660276 | 0.28408398 | 0.213868618 | -0.1525188 | 6.35E-07 | 6.75E-05 |
| TSS200  | C1orf180 | 1  | 85100819                                                                | 1 | cg00062020                                                                    | 0.72743088 | 0.51403294 | 0.472090786 | -0.2133979 | 2.66E-07 | 5.19E-05 |
| TSS200  | C2orf74  | 2  | 61372066/6137211<br>7/61372138/61372<br>165/61372058/613<br>72226       | 6 | cg01648237/cg05037<br>927/cg16328106/cg1<br>9790321/cg23405039<br>/cg24757310 | 0.38050331 | 0.56006012 | 0.670541623 | 0.17955681 | 1.18E-05 | 3.21E-04 |

|        |         |    |                                                                                       |   |                                                                                              |            |            |             |            |          |             |
|--------|---------|----|---------------------------------------------------------------------------------------|---|----------------------------------------------------------------------------------------------|------------|------------|-------------|------------|----------|-------------|
| TSS200 | C9orf50 | 9  | 132383095                                                                             | 1 | cg10640119                                                                                   | 0.18027348 | 0.38649877 | 0.440187277 | 0.2062253  | 2.50E-07 | 5.15E-05    |
| TSS200 | CCDC42  | 17 | 8648180/8648193/<br>8648175                                                           | 3 | cg15394558/cg19093<br>680/cg27513572                                                         | 0.70604267 | 0.55461281 | 0.448698632 | -0.1514299 | 1.85E-06 | 1.14E-04    |
| TSS200 | CCDC70  | 13 | 52436047                                                                              | 1 | cg11631011                                                                                   | 0.71729355 | 0.56023082 | 0.398430955 | -0.1570627 | 3.54E-05 | 0.000666547 |
| TSS200 | CDH19   | 18 | 64271341                                                                              | 1 | cg16489926                                                                                   | 0.75453834 | 0.57983383 | 0.40824685  | -0.1747045 | 1.14E-06 | 8.76E-05    |
| TSS200 | CDO1    | 5  | 115152420/115152<br>492/115152494/11<br>5152431/11515241<br>3/115152485               | 6 | cg02792792/cg08516<br>516/cg11036833/cg1<br>4470895/cg16707405<br>/cg23180938                | 0.27291541 | 0.46358363 | 0.59145335  | 0.19066822 | 1.01E-04 | 1.43E-03    |
| TSS200 | CLIP4   | 2  | 29338258/2933810<br>9/29338121/29338<br>113                                           | 4 | cg03135351/cg13257<br>636/cg23255835/cg2<br>3428985                                          | 0.35432474 | 0.52057464 | 0.639799002 | 0.1662499  | 2.69E-04 | 2.93E-03    |
| TSS200 | CMTM3   | 16 | 66638407/6663839<br>6/66638438/66638<br>412/66638433/666<br>38210                     | 6 | cg06445928/cg08601<br>917/cg08682544/cg0<br>9233013/cg26560414<br>/cg26658728                | 0.10943804 | 0.27126299 | 0.43647724  | 0.16182494 | 1.39E-03 | 1.06E-02    |
| TSS200 | DEFA6   | 8  | 6783670                                                                               | 1 | cg08312330                                                                                   | 0.76306387 | 0.60294842 | 0.492708895 | -0.1601154 | 2.87E-06 | 1.42E-04    |
| TSS200 | DSPP    | 4  | 88529516/8852958<br>4                                                                 | 2 | cg04503912/cg05292<br>310                                                                    | 0.61235391 | 0.44671017 | 0.312553486 | -0.1656437 | 1.10E-06 | 8.56E-05    |
| TSS200 | EDNRB   | 13 | 78493100/7849301<br>2/78493066/78493<br>126/78493128                                  | 5 | cg04390523/cg06179<br>060/cg06971129/cg1<br>3818654/cg15836660                               | 0.24517754 | 0.3956077  | 0.575186885 | 0.15043016 | 4.76E-04 | 0.004563924 |
| TSS200 | EID3    | 12 | 104697389/104697<br>545/104697387/10<br>4697419/10469752<br>6/104697532/1046<br>97514 | 7 | cg03817911/cg09477<br>407/cg18633684/cg2<br>0923245/cg21234561<br>/cg26614816/cg2720<br>5904 | 0.24590105 | 0.40008409 | 0.594826503 | 0.15418304 | 1.39E-03 | 1.06E-02    |
| TSS200 | FBLIM1  | 1  | 16085148                                                                              | 1 | cg04897742                                                                                   | 0.07020286 | 0.29292352 | 0.476116717 | 0.22272066 | 2.03E-06 | 1.20E-04    |
| TSS200 | FREM3   | 4  | 144621938/144621<br>952/144621898/14<br>4621971/14462194<br>5                         | 5 | cg08334984/cg09556<br>043/cg10056356/cg1<br>5042811/cg17495719                               | 0.27677518 | 0.44499661 | 0.597750659 | 0.16822143 | 6.55E-05 | 0.001049985 |
| TSS200 | GABRA6  | 5  | 161112530                                                                             | 1 | cg02703002                                                                                   | 0.649197   | 0.48022479 | 0.373673241 | -0.1689722 | 2.05E-07 | 4.65E-05    |
| TSS200 | GAD2    | 10 | 26505127/2650506<br>9/26505156                                                        | 3 | cg00733780/cg04838<br>147/cg23050442                                                         | 0.23479006 | 0.39387735 | 0.584842092 | 0.15908729 | 2.50E-03 | 1.70E-02    |
| TSS200 | GDEP    | 4  | 80748552                                                                              | 1 | cg07124719                                                                                   | 0.6897729  | 0.53145599 | 0.462399959 | -0.1583169 | 7.86E-06 | 2.50E-04    |
| TSS200 | GPSM1   | 9  | 139247374                                                                             | 1 | cg14040131                                                                                   | 0.64215983 | 0.38156756 | 0.278549441 | -0.2605923 | 2.34E-06 | 1.27E-04    |
| TSS200 | HSPB3   | 5  | 53751272/5375141<br>1                                                                 | 2 | cg17839166/cg20169<br>062                                                                    | 0.61586898 | 0.42549987 | 0.292604077 | -0.1903691 | 3.97E-07 | 5.95E-05    |

|        |           |    |                                                             |   |                                                                   |            |            |             |            |            |             |
|--------|-----------|----|-------------------------------------------------------------|---|-------------------------------------------------------------------|------------|------------|-------------|------------|------------|-------------|
| TSS200 | IL20RA    | 6  | 137366432/137366346/137366322/137366336/137366369/137366492 | 6 | cg13714540/cg15992935/cg22487322/cg24405068/cg26864905/cg27656754 | 0.60633893 | 0.43779739 | 0.326750488 | -0.1685415 | 1.36E-06   | 9.64E-05    |
| TSS200 | INHBA     | 7  | 41742795                                                    | 1 | cg18413237                                                        | 0.77036114 | 0.61803652 | 0.489446836 | -0.1523246 | 1.25E-05   | 3.35E-04    |
| TSS200 | KCNA3     | 1  | 111217691/11121712/111217715/111217785                      | 4 | cg06750832/cg07808555/cg09410234/cg26071016                       | 0.25023847 | 0.4377103  | 0.609975493 | 0.18747183 | 9.26E-05   | 1.34E-03    |
| TSS200 | KCNQ5     | 6  | 73331405                                                    | 1 | cg00852573                                                        | 0.236188   | 0.45694712 | 0.638643491 | 0.22075912 | 0.00018249 | 0.002173448 |
| TSS200 | KHDC1L    | 6  | 73935200/73935270                                           | 2 | cg19565171/cg24543552                                             | 0.6973452  | 0.53602931 | 0.394430645 | -0.1613159 | 5.27E-06   | 0.000198442 |
| TSS200 | KRT20     | 17 | 39041602                                                    | 1 | cg00091693                                                        | 0.6548402  | 0.47848071 | 0.349085609 | -0.1763595 | 3.80E-08   | 2.85E-05    |
| TSS200 | KRT6B     | 12 | 52845930/52846073/52845938/52846088                         | 4 | cg02068361/cg11601375/cg12795208/cg13221107                       | 0.60088502 | 0.39943051 | 0.348907464 | -0.2014545 | 2.87E-07   | 5.32E-05    |
| TSS200 | KRT71     | 12 | 52947004                                                    | 1 | cg05358758                                                        | 0.60128914 | 0.41367666 | 0.312331736 | -0.1876125 | 3.67E-06   | 1.59E-04    |
| TSS200 | KRTAP25-1 | 21 | 31661998                                                    | 1 | cg24145481                                                        | 0.55644044 | 0.39766739 | 0.302504641 | -0.158773  | 7.55E-07   | 7.07E-05    |
| TSS200 | KRTAP4-8  | 17 | 39254427/39254439                                           | 2 | cg12981595/cg20663846                                             | 0.55585559 | 0.40332063 | 0.297085225 | -0.152535  | 2.71E-06   | 1.39E-04    |
| TSS200 | L1TD1     | 1  | 62660421/62660281                                           | 2 | cg14254748/cg27300647                                             | 0.60533681 | 0.44314349 | 0.360132848 | -0.1621933 | 1.48E-06   | 9.96E-05    |
| TSS200 | LOC284688 | 1  | 170253405                                                   | 1 | cg25100722                                                        | 0.75726553 | 0.58327737 | 0.524935673 | -0.1739882 | 1.58E-06   | 0.00010235  |
| TSS200 | LOC285629 | 5  | 160365753                                                   | 1 | cg04390328                                                        | 0.54416927 | 0.39034162 | 0.310438068 | -0.1538276 | 9.26E-07   | 7.75E-05    |
| TSS200 | LONRF2    | 2  | 100939284                                                   | 1 | cg08017756                                                        | 0.25777184 | 0.41601109 | 0.529280941 | 0.15823925 | 2.41E-05   | 5.23E-04    |
| TSS200 | MIR1204   | 8  | 128808063/128808017                                         | 2 | cg11201447/cg25247520                                             | 0.43689859 | 0.2627119  | 0.179305958 | -0.1741867 | 1.90E-06   | 0.000116526 |
| TSS200 | MIR1910   | 16 | 85775359                                                    | 1 | cg25575961                                                        | 0.65931495 | 0.50370954 | 0.3686335   | -0.1556054 | 6.02E-06   | 2.12E-04    |
| TSS200 | MIR338    | 17 | 79099785/79099882/79099777/79099819/79099942                | 5 | cg06807993/cg06869212/cg18637486/cg21473782/cg23295826            | 0.77246894 | 0.59259095 | 0.577218555 | -0.179878  | 1.65E-09   | 2.43E-05    |
| TSS200 | MIR563    | 3  | 15915216                                                    | 1 | cg23023604                                                        | 0.66340685 | 0.50863573 | 0.382680332 | -0.1547711 | 4.16E-07   | 5.95E-05    |
| TSS200 | MMP13     | 11 | 102826570/102826565/102826469                               | 3 | cg14995062/cg19620758/cg22658979                                  | 0.75263497 | 0.55762536 | 0.396195655 | -0.1950096 | 7.00E-07   | 6.89E-05    |
| TSS200 | MMP26     | 11 | 5009311                                                     | 1 | cg12493906                                                        | 0.7180576  | 0.54207433 | 0.422492664 | -0.1759833 | 1.24E-06   | 9.26E-05    |
| TSS200 | NETO1     | 18 | 70533078/70535005                                           | 2 | cg13861749/cg18651870                                             | 0.6870667  | 0.5101433  | 0.36370005  | -0.1769234 | 1.54E-06   | 1.01E-04    |
| TSS200 | NPY       | 7  | 24323767/24323792/24323799/24323675/24323764                | 5 | cg00355281/cg15929698/cg16964348/cg24242823/cg24885417            | 0.22485096 | 0.45930533 | 0.603738122 | 0.23445437 | 3.18E-05   | 6.22E-04    |



|        |           |    |                                                               |   |                                                                |            |            |             |            |            |             |
|--------|-----------|----|---------------------------------------------------------------|---|----------------------------------------------------------------|------------|------------|-------------|------------|------------|-------------|
| TSS200 | NTRK3     | 15 | 88799820/8879970<br>7                                         | 2 | cg13773705/cg21956<br>337                                      | 0.24426909 | 0.41277991 | 0.575837173 | 0.16851082 | 1.62E-03   | 1.20E-02    |
| TSS200 | NUAK1     | 12 | 106533903/106533<br>840/106533867/10<br>6533898/10653386<br>3 | 5 | cg02518216/cg17393<br>917/cg18525352/cg2<br>0060685/cg23555120 | 0.49637478 | 0.6539193  | 0.726852429 | 0.15754452 | 2.65E-07   | 5.19E-05    |
| TSS200 | OR2M3     | 1  | 248366332                                                     | 1 | cg06393354                                                     | 0.65267757 | 0.49860187 | 0.411762314 | -0.1540757 | 9.89E-06   | 2.88E-04    |
| TSS200 | OR5A1     | 11 | 59210634                                                      | 1 | cg10919344                                                     | 0.51877846 | 0.36691158 | 0.2463723   | -0.1518669 | 6.66E-06   | 0.000227821 |
| TSS200 | OR8J3     | 11 | 55905246                                                      | 1 | cg11323650                                                     | 0.5785646  | 0.40816134 | 0.2954314   | -0.1704033 | 1.23E-06   | 9.26E-05    |
| TSS200 | PCDHGA11  | 5  | 140800495/140800<br>474/140800424/14<br>0800398               | 4 | cg03892308/cg17857<br>974/cg18118262/cg2<br>6647197            | 0.42006242 | 0.58893817 | 0.720942086 | 0.16887575 | 8.41E-05   | 1.26E-03    |
| TSS200 | PCDHGB6   | 5  | 140787623                                                     | 1 | cg09465698                                                     | 0.5019589  | 0.65708599 | 0.708289209 | 0.15512709 | 1.81E-05   | 4.30E-04    |
| TSS200 | PCDHGC4   | 5  | 140864578/140864<br>593/140864701/14<br>0864549/14086473<br>3 | 5 | cg02022733/cg03640<br>756/cg15361590/cg1<br>5949044/cg23445461 | 0.29612909 | 0.45979874 | 0.667165305 | 0.16366966 | 0.00026812 | 0.002923945 |
| TSS200 | PRND      | 20 | 4702381/4702538/<br>4702464/4702516                           | 4 | cg04636876/cg05837<br>890/cg12587930/cg2<br>4427947            | 0.74509379 | 0.58162754 | 0.455482394 | -0.1634662 | 6.76E-06   | 2.30E-04    |
| TSS200 | PRSS1     | 7  | 142457299/142457<br>284                                       | 2 | cg02329916/cg14795<br>939                                      | 0.65231582 | 0.46982979 | 0.349246105 | -0.182486  | 1.42E-06   | 9.80E-05    |
| TSS200 | PTPLAD2   | 9  | 21031822                                                      | 1 | cg14498666                                                     | 0.38264566 | 0.53543813 | 0.649741386 | 0.15279248 | 8.34E-05   | 1.25E-03    |
| TSS200 | RLBP1     | 15 | 89765061/8976504<br>5/89764999                                | 3 | cg00376910/cg08746<br>496/cg20989926                           | 0.62221355 | 0.45316784 | 0.37248542  | -0.1690457 | 1.08E-08   | 2.43E-05    |
| TSS200 | S100P     | 4  | 6695475/6695380/<br>6695377/6695464                           | 4 | cg07210669/cg14140<br>379/cg14900031/cg2<br>5083732            | 0.66811744 | 0.4932814  | 0.366300711 | -0.174836  | 1.09E-05   | 3.03E-04    |
| TSS200 | SERPINB12 | 18 | 61223377                                                      | 1 | cg00005215                                                     | 0.68915803 | 0.49351439 | 0.371855277 | -0.1956436 | 7.04E-08   | 3.25E-05    |
| TSS200 | SERPINB5  | 18 | 61143961/6114394<br>5/61143993                                | 3 | cg11862144/cg19022<br>006/cg26753302                           | 0.58269762 | 0.42124933 | 0.317292064 | -0.1614483 | 3.14E-05   | 6.19E-04    |
| TSS200 | SIRPD     | 20 | 1538366/1538353                                               | 2 | cg01247127/cg11295<br>724                                      | 0.67158648 | 0.49256962 | 0.370846718 | -0.1790169 | 1.56E-05   | 3.85E-04    |
| TSS200 | SLC16A4   | 1  | 110933767                                                     | 1 | cg00961640                                                     | 0.6624791  | 0.48953676 | 0.375002668 | -0.1729423 | 1.03E-06   | 8.31E-05    |
| TSS200 | SNORA80B  | 2  | 10587052                                                      | 1 | cg15075241                                                     | 0.66628874 | 0.49080281 | 0.352196073 | -0.1754859 | 9.88E-06   | 0.000288389 |
| TSS200 | SORCS3    | 10 | 106400686/106400<br>824/106400702/10<br>6400667               | 4 | cg03958798/cg08495<br>770/cg10601616/cg2<br>0482521            | 0.3097744  | 0.48295773 | 0.657551995 | 0.17318333 | 5.11E-04   | 4.82E-03    |
| TSS200 | SPERT     | 13 | 46276342                                                      | 1 | cg05014103                                                     | 0.54399399 | 0.39381889 | 0.3123524   | -0.1501751 | 7.01E-06   | 2.35E-04    |

|        |           |    |                                                                   |   |                                                                               |            |            |             |            |            |             |
|--------|-----------|----|-------------------------------------------------------------------|---|-------------------------------------------------------------------------------|------------|------------|-------------|------------|------------|-------------|
| TSS200 | SUSD5     | 3  | 33260743/3326073<br>2/33260752                                    | 3 | cg02239862/cg04545<br>136/cg13601427                                          | 0.23278465 | 0.38715645 | 0.541407395 | 0.1543718  | 4.97E-04   | 4.72E-03    |
| TSS200 | TCN1      | 11 | 59634218/5963419<br>1                                             | 2 | cg00187686/cg23741<br>006                                                     | 0.47672392 | 0.32445191 | 0.230647861 | -0.152272  | 2.41E-05   | 5.23E-04    |
| TSS200 | TM6SF1    | 15 | 83776271/8377626<br>9                                             | 2 | cg08452658/cg11167<br>100                                                     | 0.15124129 | 0.37686004 | 0.565246468 | 0.22561874 | 5.83E-05   | 9.60E-04    |
| TSS200 | TMEM155   | 4  | 122686432/122686<br>453/122686493/12<br>2686456                   | 4 | cg03227184/cg04638<br>468/cg07978472/cg0<br>8553437                           | 0.29977716 | 0.45178774 | 0.640223931 | 0.15201058 | 1.54E-03   | 1.15E-02    |
| TSS200 | TMPRSS11B | 4  | 69111580                                                          | 1 | cg19510180                                                                    | 0.71475154 | 0.54210318 | 0.4340898   | -0.1726484 | 1.57E-06   | 1.02E-04    |
| TSS200 | TMPRSS5   | 11 | 113577071/113577<br>118/113577120                                 | 3 | cg15844374/cg18165<br>914/cg25460340                                          | 0.78128987 | 0.61498127 | 0.563340545 | -0.1663086 | 1.79E-07   | 4.47E-05    |
| TSS200 | TTYH1     | 19 | 54926514/5492661<br>7/54926437                                    | 3 | cg15241920/cg15723<br>536/cg21883754                                          | 0.1925932  | 0.35211354 | 0.553464397 | 0.15952034 | 7.57E-03   | 4.08E-02    |
| TSS200 | VPREB1    | 22 | 22599128/2259918<br>9                                             | 2 | cg03763796/cg25330<br>366                                                     | 0.37156307 | 0.21550552 | 0.142456698 | -0.1560575 | 2.33E-05   | 5.12E-04    |
| TSS200 | ZIK1      | 19 | 58095518/5809558<br>8/58095468/58095<br>581/58095445/580<br>95595 | 6 | cg00800512/cg01046<br>104/cg04342092/cg1<br>2060744/cg18435449<br>/cg18579862 | 0.37098189 | 0.54218254 | 0.688697526 | 0.17120064 | 1.01E-04   | 1.43E-03    |
| TSS200 | ZNF217    | 20 | 52199778/5219974<br>8/52199729                                    | 3 | cg09228833/cg20979<br>153/cg22164891                                          | 0.2894478  | 0.13280495 | 0.167094655 | -0.1566429 | 5.46E-07   | 6.53E-05    |
| TSS200 | ZNF304    | 19 | 57862484/5786261<br>2/57862554/57862<br>627/57862480/578<br>62638 | 6 | cg00397851/cg13788<br>592/cg14015503/cg1<br>6848116/cg17849956<br>/cg21627760 | 0.09296582 | 0.24668245 | 0.401504245 | 0.15371663 | 5.19E-04   | 4.87E-03    |
| TSS200 | ZNF334    | 20 | 45142244/4514225<br>8/45142214/45142<br>206/45142336              | 5 | cg07139762/cg10140<br>114/cg25828181/cg2<br>6238800/cg27385032                | 0.22210235 | 0.38413437 | 0.487326399 | 0.16203201 | 2.28E-04   | 2.58E-03    |
| TSS200 | ZNF549    | 19 | 58038689/5803857<br>3/58038585/58038<br>633/58038588/580<br>38621 | 6 | cg01601746/cg06458<br>239/cg10729426/cg1<br>6697731/cg19060970<br>/cg20607331 | 0.28512836 | 0.45651963 | 0.650572955 | 0.17139127 | 0.00167747 | 0.012303265 |
| TSS200 | ZNF625    | 19 | 12267676/1226768<br>5/12267592                                    | 3 | cg02914087/cg06429<br>617/cg17287725                                          | 0.10140589 | 0.26155096 | 0.374411985 | 0.16014507 | 6.65E-04   | 5.89E-03    |
| TSS200 | ZNF626    | 19 | 20844422                                                          | 1 | cg01808171                                                                    | 0.27876178 | 0.44659247 | 0.591171732 | 0.16783069 | 1.24E-04   | 1.68E-03    |
| UTR5   | ACSS3     | 12 | 81471882/8147186<br>7/81471884                                    | 3 | cg10789281/cg13273<br>396/cg26272220                                          | 0.33108129 | 0.53160677 | 0.618354419 | 0.20052548 | 2.02E-05   | 0.000357762 |
| UTR5   | ADAM28    | 8  | 24151625                                                          | 1 | cg22915945                                                                    | 0.31534811 | 0.1558054  | 0.11973464  | -0.1595427 | 1.49E-05   | 0.000291675 |
| UTR5   | ADHFE1    | 8  | 67344720                                                          | 1 | cg20912169                                                                    | 0.25645994 | 0.41119362 | 0.660422359 | 0.15473369 | 0.00442623 | 0.020682407 |

|      |          |    |                                                                                           |    |                                                                                                               |            |            |             |            |            |             |
|------|----------|----|-------------------------------------------------------------------------------------------|----|---------------------------------------------------------------------------------------------------------------|------------|------------|-------------|------------|------------|-------------|
| UTR5 | AKNA     | 9  | 117150495                                                                                 | 1  | cg14080475                                                                                                    | 0.2317446  | 0.39307568 | 0.524686191 | 0.16133108 | 4.50E-06   | 0.000132524 |
| UTR5 | ALG1L    | 3  | 125655381/125655407                                                                       | 2  | cg05084668/cg07473553                                                                                         | 0.68058229 | 0.46332182 | 0.311121282 | -0.2172605 | 2.23E-06   | 8.53E-05    |
| UTR5 | BEND5    | 1  | 49242513/49242519                                                                         | 2  | cg11666087/cg16573178                                                                                         | 0.06582538 | 0.24613148 | 0.318706693 | 0.1803061  | 0.00489386 | 0.022395124 |
| UTR5 | BHLHE23  | 20 | 61638149                                                                                  | 1  | cg21161253                                                                                                    | 0.10811316 | 0.26170771 | 0.349949555 | 0.15359455 | 0.00160085 | 0.009303669 |
| UTR5 | C10orf90 | 10 | 128209980                                                                                 | 1  | cg24143287                                                                                                    | 0.67340542 | 0.46553872 | 0.322228568 | -0.2078667 | 4.43E-06   | 0.000131605 |
| UTR5 | C1orf70  | 1  | 1475737                                                                                   | 1  | cg16601494                                                                                                    | 0.18564747 | 0.36169337 | 0.665361532 | 0.1760459  | 0.00913281 | 0.03718464  |
| UTR5 | C9orf50  | 9  | 132383003                                                                                 | 1  | cg09731694                                                                                                    | 0.31731967 | 0.54986167 | 0.697157327 | 0.232542   | 1.07E-06   | 5.63E-05    |
| UTR5 | CAPN14   | 2  | 31440349/31439687                                                                         | 2  | cg04132353/cg15941014                                                                                         | 0.50051138 | 0.31460821 | 0.241193082 | -0.1859032 | 5.60E-06   | 0.000149667 |
| UTR5 | CD38     | 4  | 15779999/15780011                                                                         | 2  | cg02183671/cg24819835                                                                                         | 0.21345019 | 0.43939278 | 0.552727605 | 0.22594259 | 6.61E-06   | 0.000167928 |
| UTR5 | CDO1     | 5  | 115152386/115152326                                                                       | 2  | cg12880658/cg16265906                                                                                         | 0.25933619 | 0.42570901 | 0.578118532 | 0.16637282 | 0.00021965 | 0.001979774 |
| UTR5 | CLLU1    | 12 | 92818240                                                                                  | 1  | cg13003571                                                                                                    | 0.85730143 | 0.69463078 | 0.60484675  | -0.1626706 | 6.33E-05   | 0.000770386 |
| UTR5 | CMTM3    | 16 | 66638320/66638599/66638702/66638407/66638396/66638438/66638412/66638293/66638433/66638210 | 10 | cg00355909/cg03860859/cg06314872/cg06445928/cg08601917/cg08682544/cg09233013/cg23297477/cg26560414/cg26658728 | 0.11073596 | 0.28202328 | 0.429371915 | 0.17128733 | 0.00033152 | 0.002747377 |
| UTR5 | CNRIP1   | 2  | 68546899/68546688/68547088/68547141/68547052/68546579                                     | 6  | cg00020052/cg04020079/cg07594636/cg08157672/cg15313459/cg24171907                                             | 0.22884967 | 0.44246169 | 0.576738373 | 0.21361202 | 4.86E-05   | 0.000648239 |
| UTR5 | CPSF4L   | 17 | 71257980                                                                                  | 1  | cg18772573                                                                                                    | 0.8359671  | 0.67650444 | 0.703358664 | -0.1594627 | 3.68E-05   | 0.000534648 |
| UTR5 | CYP2C18  | 10 | 96443383                                                                                  | 1  | cg14196507                                                                                                    | 0.65630379 | 0.49214716 | 0.376205891 | -0.1641566 | 1.99E-07   | 2.07E-05    |
| UTR5 | DKK2     | 4  | 107957265/107957362/107956955/107957430/107957072                                         | 5  | cg01471384/cg01962428/cg08341316/cg13139972/cg26955835                                                        | 0.18229562 | 0.34234373 | 0.467727194 | 0.16004812 | 4.22E-05   | 0.000584476 |
| UTR5 | DSPP     | 4  | 88530371                                                                                  | 1  | cg09590733                                                                                                    | 0.63317119 | 0.47564467 | 0.391535282 | -0.1575265 | 9.50E-08   | 1.50E-05    |
| UTR5 | EHD3     | 2  | 31457287/31457061/31456966/31457058/31456964/31457043                                     | 6  | cg01163837/cg13795465/cg15355118/cg24743639/cg25428398/cg25840208                                             | 0.11376018 | 0.29621726 | 0.397088917 | 0.18245708 | 0.0005367  | 0.003924496 |
| UTR5 | EMB      | 5  | 49737178/49737182/49736988                                                                | 3  | cg03179043/cg08722065/cg18110165                                                                              | 0.23066055 | 0.44751176 | 0.520510282 | 0.21685121 | 6.39E-07   | 4.20E-05    |
| UTR5 | FOLH1B   | 11 | 89392829                                                                                  | 1  | cg02915544                                                                                                    | 0.59441058 | 0.41269511 | 0.265445155 | -0.1817155 | 6.85E-06   | 0.000173394 |

|      |           |    |                                                               |   |                                                                |            |            |             |            |            |             |
|------|-----------|----|---------------------------------------------------------------|---|----------------------------------------------------------------|------------|------------|-------------|------------|------------|-------------|
| UTR5 | GAD2      | 10 | 26505442/2650550<br>3/26505440/26505<br>245                   | 4 | cg04599297/cg09056<br>181/cg11328303/cg1<br>5850954            | 0.27707442 | 0.44180043 | 0.613517622 | 0.16472601 | 0.00081042 | 0.005440494 |
| UTR5 | GIF       | 11 | 59612937                                                      | 1 | cg01282204                                                     | 0.75930133 | 0.53320967 | 0.396963041 | -0.2260917 | 1.62E-08   | 9.11E-06    |
| UTR5 | GYPC      | 2  | 127413831                                                     | 1 | cg15975865                                                     | 0.30371499 | 0.48904628 | 0.648228845 | 0.18533129 | 0.0025577  | 0.013399792 |
| UTR5 | HSPB3     | 5  | 53751493                                                      | 1 | cg01246617                                                     | 0.69732705 | 0.49313077 | 0.357341864 | -0.2041963 | 5.98E-08   | 1.20E-05    |
| UTR5 | IRF4      | 6  | 391936/392555/39<br>3110/392131/3917<br>64                    | 5 | cg06392169/cg12612<br>118/cg12684209/cg1<br>2741420/cg17228900 | 0.23761797 | 0.4350776  | 0.610867689 | 0.19745963 | 0.00013128 | 0.001341603 |
| UTR5 | ITGA4     | 2  | 182322268/182322<br>058/182321855/18<br>2322279/18232178<br>6 | 5 | cg06952671/cg10526<br>659/cg20415809/cg2<br>1995919/cg25652029 | 0.26461093 | 0.46416069 | 0.63316878  | 0.19954977 | 0.00029217 | 0.002480946 |
| UTR5 | KCNA3     | 1  | 111217575/111217<br>497                                       | 2 | cg01423964/cg11595<br>545                                      | 0.22540021 | 0.44703181 | 0.578786818 | 0.2216316  | 5.41E-05   | 0.000690954 |
| UTR5 | KIAA0802  | 18 | 8717926/8717905                                               | 2 | cg07955887/cg19522<br>644                                      | 0.68367303 | 0.47154349 | 0.395284905 | -0.2121295 | 6.76E-10   | 2.85E-06    |
| UTR5 | KRT7      | 12 | 52627047                                                      | 1 | cg09670128                                                     | 0.37070131 | 0.53105941 | 0.734100745 | 0.1603581  | 0.00504659 | 0.023017625 |
| UTR5 | KRTAP24-1 | 21 | 31655261                                                      | 1 | cg07172334                                                     | 0.56064531 | 0.33288377 | 0.239309864 | -0.2277615 | 7.66E-08   | 1.38E-05    |
| UTR5 | LCE3D     | 1  | 152552494                                                     | 1 | cg20676475                                                     | 0.71794003 | 0.55167926 | 0.380826986 | -0.1662608 | 1.31E-05   | 0.000268016 |
| UTR5 | LFNG      | 7  | 2557715                                                       | 1 | cg20572537                                                     | 0.53902541 | 0.37118509 | 0.294986845 | -0.1678403 | 4.69E-07   | 3.43E-05    |
| UTR5 | LONRF2    | 2  | 100939045/100938<br>903/100938813/10<br>0938799               | 4 | cg07304692/cg14675<br>211/cg14997226/cg2<br>3977631            | 0.08408882 | 0.25808533 | 0.391470726 | 0.17399651 | 4.67E-05   | 0.000627757 |
| UTR5 | MAL       | 2  | 95691500                                                      | 1 | cg22403344                                                     | 0.13239692 | 0.29368619 | 0.438046159 | 0.16128928 | 0.0008229  | 0.005503434 |
| UTR5 | MMP12     | 11 | 102745682                                                     | 1 | cg20487452                                                     | 0.61555095 | 0.45573393 | 0.3300052   | -0.159817  | 8.32E-06   | 0.000195493 |
| UTR5 | NPY       | 7  | 24324570/2432443<br>5/24323939/24323<br>840                   | 4 | cg11475550/cg12614<br>105/cg21097881/cg2<br>5884711            | 0.28880786 | 0.44413203 | 0.564067368 | 0.15532416 | 0.00019345 | 0.001796017 |
| UTR5 | PCDHGA11  | 5  | 140800586/140800<br>629/140800761                             | 3 | cg05870739/cg10679<br>597/cg24954895                           | 0.41512593 | 0.57235891 | 0.715389425 | 0.15723298 | 7.43E-05   | 0.000861528 |
| UTR5 | RIC3      | 11 | 8190565/8190572                                               | 2 | cg08383315/cg25778<br>535                                      | 0.30006801 | 0.45225332 | 0.576551684 | 0.15218531 | 0.0001837  | 0.00173835  |
| UTR5 | RLBP1     | 15 | 89764836/8976489<br>5                                         | 2 | cg10173075/cg15808<br>008                                      | 0.64004254 | 0.45511398 | 0.3678254   | -0.1849286 | 1.55E-09   | 3.18E-06    |
| UTR5 | SCGB2A2   | 11 | 62037659                                                      | 1 | cg22862656                                                     | 0.81272038 | 0.60955429 | 0.447701014 | -0.2031661 | 1.69E-06   | 7.18E-05    |
| UTR5 | SLC16A4   | 1  | 110933248/110933<br>345                                       | 2 | cg09494546/cg25320<br>780                                      | 0.69638202 | 0.54066308 | 0.445331232 | -0.1557189 | 2.07E-07   | 2.07E-05    |
| UTR5 | SLC36A2   | 5  | 150727045                                                     | 1 | cg19562321                                                     | 0.47641976 | 0.32174868 | 0.196324459 | -0.1546711 | 8.87E-06   | 0.000204848 |
| UTR5 | SORCS3    | 10 | 106400880                                                     | 1 | cg16787600                                                     | 0.34106859 | 0.5001111  | 0.680446518 | 0.15904252 | 0.00149142 | 0.008798153 |

|       |          |    |                                                       |   |                                                                   |            |            |             |            |            |             |
|-------|----------|----|-------------------------------------------------------|---|-------------------------------------------------------------------|------------|------------|-------------|------------|------------|-------------|
| UTR5  | SPAG4L   | 20 | 31592147                                              | 1 | cg02510802                                                        | 0.74023952 | 0.57363131 | 0.371162491 | -0.1666082 | 3.14E-05   | 0.000483694 |
| UTR5  | TFPI2    | 7  | 93520036/93520024/93520012                            | 3 | cg14775114/cg17338208/cg24531255                                  | 0.13930434 | 0.32959887 | 0.545375324 | 0.19029454 | 0.00051541 | 0.003801517 |
| UTR5  | TM6SF1   | 15 | 83776422/83776420                                     | 2 | cg03063639/cg26460092                                             | 0.28852964 | 0.47710419 | 0.674643993 | 0.18857455 | 0.00055142 | 0.004003174 |
| UTR5  | TMEM71   | 8  | 133772657/133772889/133772742                         | 3 | cg03141298/cg20955688/cg27159719                                  | 0.3211927  | 0.1693228  | 0.169164931 | -0.1518699 | 2.05E-07   | 2.07E-05    |
| UTR5  | TTN      | 2  | 179672121/179672126                                   | 2 | cg05185019/cg10859358                                             | 0.77635657 | 0.58309665 | 0.495723477 | -0.1932599 | 2.49E-06   | 9.24E-05    |
| UTR5  | UMOD     | 16 | 20363009/20363711                                     | 2 | cg04231019/cg07456201                                             | 0.65645896 | 0.48850246 | 0.322445711 | -0.1679565 | 1.90E-05   | 0.000345858 |
| UTR5  | ZFP82    | 19 | 36909326/36906819/36909413/36909418                   | 4 | cg07900968/cg19750174/cg24724633/cg25886284                       | 0.34075043 | 0.49869339 | 0.634785768 | 0.15794296 | 0.00130542 | 0.007907773 |
| UTR5  | ZIK1     | 19 | 58095659                                              | 1 | cg26246807                                                        | 0.37561466 | 0.59770664 | 0.758164927 | 0.22209199 | 0.00014617 | 0.001454171 |
| UTR5  | ZNF304   | 19 | 57862713                                              | 1 | cg07494047                                                        | 0.08492214 | 0.23621898 | 0.429114705 | 0.15129684 | 0.00021295 | 0.001935385 |
| UTR5  | ZNF625   | 19 | 12267308/12267464/12266489                            | 3 | cg00875960/cg17892556/cg22606224                                  | 0.28509169 | 0.48990408 | 0.591177046 | 0.20481239 | 1.18E-05   | 0.000246009 |
| EXON1 | ABCC11   | 16 | 48265760                                              | 1 | cg09228051                                                        | 0.52717301 | 0.33331525 | 0.231701973 | -0.1938578 | 1.49E-06   | 1.46E-04    |
| EXON1 | ACSS3    | 12 | 81472177/81471938/81471882/81471867/81472118/81471884 | 6 | cg01283289/cg05143887/cg10789281/cg13273396/cg24711649/cg26272220 | 0.33318431 | 0.50958241 | 0.580906063 | 0.1763981  | 1.12E-05   | 4.41E-04    |
| EXON1 | ADAM28   | 8  | 24151625                                              | 1 | cg22915945                                                        | 0.31534811 | 0.1558054  | 0.11973464  | -0.1595427 | 1.49E-05   | 5.19E-04    |
| EXON1 | ADHFE1   | 8  | 67344720                                              | 1 | cg20912169                                                        | 0.25645994 | 0.41119362 | 0.660422359 | 0.15473369 | 4.43E-03   | 2.88E-02    |
| EXON1 | ANKS4B   | 16 | 21245151                                              | 1 | cg26937434                                                        | 0.56735228 | 0.40597067 | 0.279589323 | -0.1613816 | 2.62E-05   | 7.45E-04    |
| EXON1 | APBB1IP  | 10 | 26727318                                              | 1 | cg05475934                                                        | 0.3810481  | 0.5482303  | 0.644688227 | 0.16718221 | 7.34E-06   | 0.000346893 |
| EXON1 | BEND5    | 1  | 49242359/49242513/49242519                            | 3 | cg06744574/cg11666087/cg16573178                                  | 0.07530915 | 0.25973101 | 0.33691097  | 0.18442186 | 3.05E-03   | 2.18E-02    |
| EXON1 | BEST2    | 19 | 12863557                                              | 1 | cg19743791                                                        | 0.65604893 | 0.50185895 | 0.384092309 | -0.15419   | 7.37E-06   | 3.47E-04    |
| EXON1 | C10orf90 | 10 | 128209980                                             | 1 | cg24143287                                                        | 0.67340542 | 0.46553872 | 0.322228568 | -0.2078667 | 4.43E-06   | 2.62E-04    |
| EXON1 | C1orf70  | 1  | 1475675/1475737                                       | 2 | cg16306898/cg16601494                                             | 0.13471528 | 0.32452273 | 0.606946738 | 0.18980745 | 2.76E-03   | 2.02E-02    |
| EXON1 | C2orf74  | 2  | 61372316/61372256                                     | 2 | cg10580144/cg18158151                                             | 0.31029721 | 0.50879332 | 0.667898914 | 0.1984961  | 1.70E-05   | 5.68E-04    |
| EXON1 | C9orf50  | 9  | 132383003/132382812/132382433                         | 3 | cg09731694/cg13405887/cg14015706                                  | 0.23142934 | 0.52166887 | 0.667683026 | 0.29023953 | 8.88E-08   | 4.86E-05    |
| EXON1 | CD38     | 4  | 15779999/15780011/15780238                            | 3 | cg02183671/cg24819835/cg26043257                                  | 0.21345019 | 0.43939278 | 0.552727605 | 0.22594259 | 6.61E-06   | 3.34E-04    |

|       |         |    |                                                                                           |    |                                                                                                               |            |            |             |            |            |             |
|-------|---------|----|-------------------------------------------------------------------------------------------|----|---------------------------------------------------------------------------------------------------------------|------------|------------|-------------|------------|------------|-------------|
| EXON1 | CDO1    | 5  | 115152019/115152386/115152326                                                             | 3  | cg07405021/cg12880658/cg16265906                                                                              | 0.24518058 | 0.39715734 | 0.52278282  | 0.15197677 | 0.00031505 | 0.004066793 |
| EXON1 | CLIP4   | 2  | 29338432                                                                                  | 1  | cg08808128                                                                                                    | 0.15299871 | 0.32100477 | 0.562527791 | 0.16800606 | 0.00223993 | 0.017277059 |
| EXON1 | CLLU1   | 12 | 92818240                                                                                  | 1  | cg13003571                                                                                                    | 0.85730143 | 0.69463078 | 0.60484675  | -0.1626706 | 6.33E-05   | 1.33E-03    |
| EXON1 | CMTM3   | 16 | 66638320/66638599/66638702/66638407/66638396/66638438/66638412/66638293/66638433/66638210 | 10 | cg00355909/cg03860859/cg06314872/cg06445928/cg08601917/cg08682544/cg09233013/cg23297477/cg26560414/cg26658728 | 0.11073596 | 0.28202328 | 0.429371915 | 0.17128733 | 3.32E-04   | 4.22E-03    |
| EXON1 | CNRIP1  | 2  | 68546899/68546688/68546507/68547088/68547141/68546467/68547052/68546579                   | 8  | cg00020052/cg04020079/cg07080358/cg07594636/cg08157672/cg11573679/cg15313459/cg24171907                       | 0.21755924 | 0.44587073 | 0.58209091  | 0.22831149 | 3.46E-05   | 8.84E-04    |
| EXON1 | CPSF4L  | 17 | 71257980                                                                                  | 1  | cg18772573                                                                                                    | 0.8359671  | 0.67650444 | 0.703358664 | -0.1594627 | 3.68E-05   | 9.34E-04    |
| EXON1 | CYP2C18 | 10 | 96443383                                                                                  | 1  | cg14196507                                                                                                    | 0.65630379 | 0.49214716 | 0.376205891 | -0.1641566 | 1.99E-07   | 5.79E-05    |
| EXON1 | DEFB135 | 8  | 11839844                                                                                  | 1  | cg22743884                                                                                                    | 0.6567988  | 0.48981156 | 0.313000655 | -0.1669872 | 6.59E-05   | 1.36E-03    |
| EXON1 | DKK2    | 4  | 107956556/107957265/107957362/107956955/107957430/107957072                               | 6  | cg00594011/cg01471384/cg01962428/cg08341316/cg13139972/cg26955835                                             | 0.20238016 | 0.36249417 | 0.489249718 | 0.16011401 | 4.50E-05   | 1.07E-03    |
| EXON1 | DMRT1   | 9  | 841850                                                                                    | 1  | cg03168582                                                                                                    | 0.09390504 | 0.2643655  | 0.371218771 | 0.17046046 | 7.11E-03   | 4.15E-02    |
| EXON1 | EFCAB3  | 17 | 60447682                                                                                  | 1  | cg17876595                                                                                                    | 0.77645862 | 0.60523542 | 0.423534982 | -0.1712232 | 2.15E-05   | 6.54E-04    |
| EXON1 | EMB     | 5  | 49737178/49737182/49736988                                                                | 3  | cg03179043/cg08722065/cg18110165                                                                              | 0.23066055 | 0.44751176 | 0.520510282 | 0.21685121 | 6.39E-07   | 9.98E-05    |
| EXON1 | FHL5    | 6  | 97010439                                                                                  | 1  | cg23978322                                                                                                    | 0.78676366 | 0.62782916 | 0.527864168 | -0.1589345 | 3.64E-06   | 2.38E-04    |
| EXON1 | FOLH1B  | 11 | 89392829                                                                                  | 1  | cg02915544                                                                                                    | 0.59441058 | 0.41269511 | 0.265445155 | -0.1817155 | 6.85E-06   | 3.39E-04    |
| EXON1 | GAD2    | 10 | 26505442/26505503/26505440/26505245                                                       | 4  | cg04599297/cg09056181/cg11328303/cg15850954                                                                   | 0.27707442 | 0.44180043 | 0.613517622 | 0.16472601 | 8.10E-04   | 7.97E-03    |
| EXON1 | GATA4   | 8  | 11561724/11561728                                                                         | 2  | cg14666113/cg18283386                                                                                         | 0.20684506 | 0.37116059 | 0.619421941 | 0.16431554 | 0.00284085 | 0.020584483 |
| EXON1 | GIF     | 11 | 59612937                                                                                  | 1  | cg01282204                                                                                                    | 0.75930133 | 0.53320967 | 0.396963041 | -0.2260917 | 1.62E-08   | 2.58E-05    |
| EXON1 | GPR128  | 3  | 100328745/100328713                                                                       | 2  | cg04071964/cg23855093                                                                                         | 0.52189019 | 0.36477268 | 0.299061832 | -0.1571175 | 3.37E-08   | 4.05E-05    |
| EXON1 | GPT2    | 16 | 46919112/46919194                                                                         | 2  | cg03533472/cg23684449                                                                                         | 0.68016188 | 0.50773397 | 0.4307959   | -0.1724279 | 4.64E-06   | 2.68E-04    |
| EXON1 | GYPC    | 2  | 127413831                                                                                 | 1  | cg15975865                                                                                                    | 0.30371499 | 0.48904628 | 0.648228845 | 0.18533129 | 2.56E-03   | 1.93E-02    |

|       |           |    |                                                             |   |                                                                   |            |            |             |            |            |             |
|-------|-----------|----|-------------------------------------------------------------|---|-------------------------------------------------------------------|------------|------------|-------------|------------|------------|-------------|
| EXON1 | IRF4      | 6  | 391764                                                      | 1 | cg17228900                                                        | 0.10086644 | 0.31432297 | 0.585962585 | 0.21345653 | 1.45E-03   | 1.24E-02    |
| EXON1 | ITGA4     | 2  | 182322268/182322058/182321855/182322279/182322501/182321786 | 6 | cg06952671/cg10526659/cg20415809/cg21995919/cg25024074/cg25652029 | 0.26076316 | 0.45898675 | 0.611804352 | 0.19822359 | 1.34E-04   | 2.22E-03    |
| EXON1 | ITIH2     | 10 | 7745454                                                     | 1 | cg06224510                                                        | 0.52290188 | 0.36192469 | 0.230658309 | -0.1609772 | 4.35E-06   | 2.61E-04    |
| EXON1 | KPNA7     | 7  | 98805084                                                    | 1 | cg22498453                                                        | 0.76428644 | 0.59490261 | 0.590208441 | -0.1693838 | 8.77E-09   | 2.32E-05    |
| EXON1 | KRT20     | 17 | 39041266/39041199/39041110                                  | 4 | cg19114576/cg19449377/cg23901700/cg25124433                       | 0.78386269 | 0.5532605  | 0.399192683 | -0.2306022 | 2.52E-07   | 6.67E-05    |
| EXON1 | KRTAP15-1 | 21 | 31813075                                                    | 1 | cg16812893                                                        | 0.59362799 | 0.44057094 | 0.334187759 | -0.153057  | 3.64E-06   | 2.38E-04    |
| EXON1 | KRTAP7-1  | 21 | 32202010                                                    | 1 | cg05533037                                                        | 0.61733834 | 0.43981978 | 0.331629845 | -0.1775186 | 5.50E-05   | 1.22E-03    |
| EXON1 | LONRF2    | 2  | 100937944/100939045/100938444/100938903/100938813/100938799 | 6 | cg03559235/cg07304692/cg14348439/cg14675211/cg14997226/cg23977631 | 0.08408882 | 0.25808533 | 0.391470726 | 0.17399651 | 4.67E-05   | 0.001094305 |
| EXON1 | LRRIQ4    | 3  | 169539775/169540297/169540504/169540079                     | 4 | cg04748593/cg13793580/cg18155853/cg23081534                       | 0.81034238 | 0.57668054 | 0.389583758 | -0.2336618 | 3.58E-07   | 7.77E-05    |
| EXON1 | MAL       | 2  | 95691500                                                    | 1 | cg22403344                                                        | 0.13239692 | 0.29368619 | 0.438046159 | 0.16128928 | 0.0008229  | 0.008069767 |
| EXON1 | MMP12     | 11 | 102745682                                                   | 1 | cg20487452                                                        | 0.61555095 | 0.45573393 | 0.3300052   | -0.159817  | 8.32E-06   | 3.71E-04    |
| EXON1 | MSC       | 8  | 72756155/72756341/72756656/72756058                         | 4 | cg09734791/cg14409559/cg23710218/cg25832771                       | 0.20825075 | 0.38081241 | 0.516248264 | 0.17256166 | 0.00117507 | 0.010567666 |
| EXON1 | MST1R     | 3  | 49941151/49940853/49940126/49940919/49940245/49940353       | 6 | cg03332271/cg08687163/cg11001085/cg11839681/cg18706476/cg23437479 | 0.73540785 | 0.54741605 | 0.432983918 | -0.1879918 | 3.19E-07   | 7.65E-05    |
| EXON1 | OLFM4     | 13 | 53603157                                                    | 1 | cg24932628                                                        | 0.6151768  | 0.43447863 | 0.355098023 | -0.1806982 | 7.79E-07   | 1.03E-04    |
| EXON1 | OR10T2    | 1  | 158369112/158368889                                         | 2 | cg15593510/cg15852352                                             | 0.67808873 | 0.50158904 | 0.350021123 | -0.1764997 | 5.51E-07   | 9.47E-05    |
| EXON1 | OR2AK2    | 1  | 248129192                                                   | 1 | cg11977100                                                        | 0.59376515 | 0.44018931 | 0.286650286 | -0.1535758 | 8.58E-06   | 0.000374771 |
| EXON1 | OR9Q1     | 11 | 57791564                                                    | 1 | cg03034198                                                        | 0.75049994 | 0.57641685 | 0.519473877 | -0.1740831 | 4.01E-06   | 2.48E-04    |
| EXON1 | PREX1     | 20 | 47444241                                                    | 1 | cg03361585                                                        | 0.10036197 | 0.26961979 | 0.393830719 | 0.16925783 | 4.06E-04   | 4.82E-03    |
| EXON1 | PRND      | 20 | 4702581                                                     | 1 | cg09906458                                                        | 0.66278959 | 0.50445671 | 0.349004655 | -0.1583329 | 7.34E-06   | 3.47E-04    |
| EXON1 | PRR4      | 12 | 11324142/11002071/11324180                                  | 3 | cg21216543/cg23272369/cg26983578                                  | 0.81355756 | 0.65203154 | 0.578963895 | -0.161526  | 5.92E-06   | 0.000308392 |
| EXON1 | PYGO1     | 15 | 55881044                                                    | 1 | cg25902187                                                        | 0.17366485 | 0.35751739 | 0.522236799 | 0.18385254 | 4.13E-03   | 2.73E-02    |
| EXON1 | RAMP3     | 7  | 45197441                                                    | 1 | cg14999001                                                        | 0.24034283 | 0.41848183 | 0.540330959 | 0.178139   | 5.57E-04   | 6.02E-03    |

|          |          |    |                                     |   |                                             |            |            |             |            |            |             |
|----------|----------|----|-------------------------------------|---|---------------------------------------------|------------|------------|-------------|------------|------------|-------------|
| EXON1    | RLBP1    | 15 | 89764836/89764895                   | 2 | cg10173075/cg15808008                       | 0.64004254 | 0.45511398 | 0.3678254   | -0.1849286 | 1.55E-09   | 7.41E-06    |
| EXON1    | SARM1    | 17 | 26699187/26699169/26699485          | 3 | cg05854644/cg15760257/cg20686234            | 0.13072045 | 0.29554842 | 0.409477434 | 0.16482797 | 5.10E-04   | 5.68E-03    |
| EXON1    | SCGB2A2  | 11 | 62037659                            | 1 | cg22862656                                  | 0.81272038 | 0.60955429 | 0.447701014 | -0.2031661 | 1.69E-06   | 1.50E-04    |
| EXON1    | SERPINA1 | 14 | 94855034/94856984/94855088/94855099 | 4 | cg02126235/cg02181506/cg05346611/cg22828990 | 0.72827076 | 0.52588463 | 0.3817073   | -0.2023861 | 7.48E-07   | 1.03E-04    |
| EXON1    | SFMBT2   | 10 | 7453329                             | 1 | cg20506184                                  | 0.15607953 | 0.40563856 | 0.595730313 | 0.24955903 | 5.88E-05   | 1.25E-03    |
| EXON1    | SLC36A2  | 5  | 150727045                           | 1 | cg19562321                                  | 0.47641976 | 0.32174868 | 0.196324459 | -0.1546711 | 8.87E-06   | 3.82E-04    |
| EXON1    | SLC3A1   | 2  | 44502740/44502977                   | 2 | cg02192965/cg03217954                       | 0.59685885 | 0.42119046 | 0.334986914 | -0.1756684 | 1.42E-06   | 1.43E-04    |
| EXON1    | SLC9A9   | 3  | 143567031                           | 1 | cg23538718                                  | 0.16155301 | 0.33876684 | 0.377645814 | 0.17721383 | 1.76E-04   | 2.68E-03    |
| EXON1    | SPAG4L   | 20 | 31592147                            | 1 | cg02510802                                  | 0.74023952 | 0.57363131 | 0.371162491 | -0.1666082 | 3.14E-05   | 8.32E-04    |
| EXON1    | TAS2R9   | 12 | 10962437                            | 1 | cg20090497                                  | 0.68535001 | 0.52584179 | 0.424362132 | -0.1595082 | 1.61E-05   | 5.47E-04    |
| EXON1    | TFPI2    | 7  | 93520036/93520024/93519924/93520012 | 4 | cg14775114/cg17338208/cg23686014/cg24531255 | 0.14245076 | 0.32175358 | 0.519702184 | 0.17930281 | 4.35E-04   | 5.07E-03    |
| EXON1    | TM6SF1   | 15 | 83776422/83776446/83776420          | 3 | cg03063639/cg14696396/cg26460092            | 0.28852964 | 0.47710419 | 0.674643993 | 0.18857455 | 5.51E-04   | 0.005979301 |
| EXON1    | TMEM71   | 8  | 133772889/133772742                 | 2 | cg20955688/cg27159719                       | 0.3211927  | 0.1693228  | 0.169164931 | -0.1518699 | 2.05E-07   | 5.79E-05    |
| EXON1    | TP63     | 3  | 189349278/189349323                 | 2 | cg04483101/cg21723486                       | 0.73135097 | 0.58075488 | 0.449463195 | -0.1505961 | 3.98E-05   | 9.85E-04    |
| EXON1    | TTN      | 2  | 179672121/179672126                 | 2 | cg05185019/cg10859358                       | 0.77635657 | 0.58309665 | 0.495723477 | -0.1932599 | 2.49E-06   | 1.96E-04    |
| EXON1    | USP54    | 10 | 75335352                            | 1 | cg12303623                                  | 0.56002716 | 0.40020419 | 0.346340677 | -0.159823  | 9.31E-08   | 4.86E-05    |
| EXON1    | ZFP82    | 19 | 36909413/36909418                   | 2 | cg24724633/cg25886284                       | 0.1621262  | 0.37458051 | 0.543410133 | 0.21245431 | 0.00078024 | 0.007743324 |
| EXON1    | ZIK1     | 19 | 58095659                            | 1 | cg26246807                                  | 0.37561466 | 0.59770664 | 0.758164927 | 0.22209199 | 1.46E-04   | 2.36E-03    |
| EXON1    | ZNF304   | 19 | 57863057/57862713                   | 2 | cg04685743/cg07494047                       | 0.08492214 | 0.23621898 | 0.429114705 | 0.15129684 | 2.13E-04   | 3.03E-03    |
| EXON1    | ZNF625   | 19 | 12267464                            | 1 | cg17892556                                  | 0.18447788 | 0.42516717 | 0.539363618 | 0.24068929 | 1.30E-04   | 2.17E-03    |
| EXON1    | ZNF793   | 19 | 37997867                            | 1 | cg15139588                                  | 0.09884138 | 0.25572428 | 0.475644413 | 0.15688291 | 2.23E-03   | 1.73E-02    |
| GENEBODY | ABCD2    | 12 | 39981136                            | 1 | cg13406085                                  | 0.71778078 | 0.56527744 | 0.388307936 | -0.1525033 | 2.27E-05   | 2.25E-04    |
| GENEBODY | APOL5    | 22 | 36123779                            | 1 | cg25036527                                  | 0.61314906 | 0.45581511 | 0.348639441 | -0.157334  | 1.32E-05   | 1.55E-04    |
| GENEBODY | ASCC2    | 22 | 30195299                            | 1 | cg14742445                                  | 0.62358413 | 0.42714246 | 0.297950882 | -0.1964417 | 4.89E-06   | 8.40E-05    |
| GENEBODY | ASCL3    | 11 | 8959438                             | 1 | cg14711859                                  | 0.80166068 | 0.6463918  | 0.528616877 | -0.1552689 | 5.33E-06   | 8.84E-05    |
| GENEBODY | ATP6V1G3 | 1  | 198509669                           | 1 | cg12958813                                  | 0.8201387  | 0.62559844 | 0.495645964 | -0.1945403 | 6.53E-05   | 4.78E-04    |
| GENEBODY | BPIL3    | 20 | 31619647                            | 1 | cg18223379                                  | 0.69019139 | 0.52916155 | 0.452184077 | -0.1610298 | 3.25E-05   | 2.87E-04    |
| GENEBODY | C18orf26 | 18 | 52262555                            | 1 | cg01174441                                  | 0.704882   | 0.53391837 | 0.387608936 | -0.1709636 | 1.26E-06   | 3.83E-05    |



|          |                  |    |                                                                         |   |                                                                               |            |            |             |            |          |          |
|----------|------------------|----|-------------------------------------------------------------------------|---|-------------------------------------------------------------------------------|------------|------------|-------------|------------|----------|----------|
| GENEBODY | C1orf180         | 1  | 85100313/8509859<br>8                                                   | 2 | cg11387751/cg25388<br>882                                                     | 0.62865284 | 0.47617227 | 0.39536335  | -0.1524806 | 5.78E-07 | 2.49E-05 |
| GENEBODY | C1QTNF4          | 11 | 47612070/4761178<br>0                                                   | 2 | cg05537653/cg18356<br>785                                                     | 0.25802581 | 0.41192562 | 0.491033436 | 0.15389981 | 3.94E-05 | 3.30E-04 |
| GENEBODY | C6               | 5  | 41160373/4115276<br>7                                                   | 2 | cg02598319/cg16582<br>255                                                     | 0.66406226 | 0.50852991 | 0.424378073 | -0.1555323 | 4.34E-08 | 7.64E-06 |
| GENEBODY | C9orf70          | 9  | 3899055                                                                 | 1 | cg14269813                                                                    | 0.51581376 | 0.29938383 | 0.253730073 | -0.2164299 | 9.84E-07 | 3.29E-05 |
| GENEBODY | CD1B             | 1  | 158301038/158300<br>733                                                 | 2 | cg04574507/cg15952<br>487                                                     | 0.51078378 | 0.35851476 | 0.2767323   | -0.152269  | 8.20E-08 | 9.87E-06 |
| GENEBODY | CLDN12           | 7  | 90042240                                                                | 1 | cg25244356                                                                    | 0.78811969 | 0.56706839 | 0.470522159 | -0.2210513 | 2.66E-07 | 1.72E-05 |
| GENEBODY | CTSB             | 8  | 11710911                                                                | 1 | cg03654169                                                                    | 0.64798756 | 0.46403137 | 0.3500838   | -0.1839562 | 1.45E-07 | 1.30E-05 |
| GENEBODY | CTSS             | 1  | 150722805                                                               | 1 | cg10954654                                                                    | 0.80894692 | 0.59973143 | 0.489601082 | -0.2092155 | 2.08E-07 | 1.52E-05 |
| GENEBODY | DCD              | 12 | 55041948/5504137<br>9                                                   | 2 | cg00868860/cg13396<br>068                                                     | 0.57983145 | 0.41798674 | 0.28471787  | -0.1618447 | 1.71E-05 | 1.85E-04 |
| GENEBODY | EIF3IP1          | 7  | 109599644                                                               | 1 | cg14146669                                                                    | 0.7158862  | 0.55539858 | 0.426187    | -0.1604876 | 2.73E-05 | 2.55E-04 |
| GENEBODY | FAM49A           | 2  | 16767476                                                                | 1 | cg10090418                                                                    | 0.77069938 | 0.59044391 | 0.396925518 | -0.1802555 | 2.19E-04 | 1.19E-03 |
| GENEBODY | FCGR3B           | 1  | 161600769                                                               | 1 | cg04567009                                                                    | 0.67330976 | 0.51061459 | 0.379355841 | -0.1626952 | 2.18E-05 | 2.18E-04 |
| GENEBODY | GPR171           | 3  | 150916446                                                               | 1 | cg15715853                                                                    | 0.76345609 | 0.56104524 | 0.4579293   | -0.2024108 | 1.33E-07 | 1.21E-05 |
| GENEBODY | IL7R             | 5  | 35860337                                                                | 1 | cg01027405                                                                    | 0.47155128 | 0.32000952 | 0.238115591 | -0.1515418 | 1.99E-06 | 4.94E-05 |
| GENEBODY | ITLN1            | 1  | 160850377                                                               | 1 | cg07177437                                                                    | 0.67076678 | 0.50537068 | 0.445825432 | -0.1653961 | 1.80E-06 | 4.63E-05 |
| GENEBODY | KIAA0748         | 12 | 55362424/5536824<br>4                                                   | 2 | cg02710015/cg06352<br>538                                                     | 0.70253258 | 0.51994114 | 0.423248273 | -0.1825914 | 7.25E-07 | 2.75E-05 |
| GENEBODY | KRT14            | 17 | 39739598/3973954<br>1/39739912/39739<br>860/39739524                    | 5 | cg03508348/cg05376<br>477/cg06339505/cg1<br>2362508/cg15748407                | 0.82813819 | 0.67396028 | 0.631046352 | -0.1541779 | 2.33E-06 | 5.36E-05 |
| GENEBODY | LOC10012828<br>r | 17 | 8263420                                                                 | 1 | cg08906309                                                                    | 0.63322548 | 0.475523   | 0.337774082 | -0.1577025 | 6.44E-05 | 4.74E-04 |
| GENEBODY | LOC339568        | 20 | 37850248                                                                | 1 | cg04742334                                                                    | 0.57372006 | 0.39118003 | 0.263340682 | -0.18254   | 4.10E-06 | 7.59E-05 |
| GENEBODY | LOC643719        | 19 | 35068555/3506822<br>1                                                   | 2 | cg23200020/cg25418<br>852                                                     | 0.43822757 | 0.58900259 | 0.745249427 | 0.15077502 | 6.59E-04 | 2.86E-03 |
| GENEBODY | LOC647121        | 1  | 121261146/121261<br>404/121261077/12<br>1261369/12126160<br>2/121305260 | 6 | cg04374231/cg05827<br>631/cg06970370/cg0<br>7794500/cg19165105<br>/cg20769683 | 0.32391262 | 0.48947165 | 0.5845832   | 0.16555903 | 3.42E-06 | 6.79E-05 |
| GENEBODY | LYG2             | 2  | 99867344                                                                | 1 | cg12213414                                                                    | 0.73208942 | 0.52563324 | 0.400153191 | -0.2064562 | 2.19E-06 | 5.19E-05 |
| GENEBODY | MCHR2            | 6  | 100380550                                                               | 1 | cg07108581                                                                    | 0.64954945 | 0.48530788 | 0.381360482 | -0.1642416 | 3.49E-06 | 6.86E-05 |
| GENEBODY | MIR338           | 17 | 79099711                                                                | 1 | cg26766064                                                                    | 0.51117175 | 0.34908266 | 0.3546869   | -0.1626348 | 1.78E-08 | 6.06E-06 |
| GENEBODY | MIR376C          | 14 | 101506087                                                               | 1 | cg13995230                                                                    | 0.46416821 | 0.28744265 | 0.192639905 | -0.1767256 | 7.91E-06 | 1.14E-04 |
| GENEBODY | MIR495           | 14 | 101500125                                                               | 1 | cg14910227                                                                    | 0.69446684 | 0.53624244 | 0.459293677 | -0.1582244 | 5.33E-06 | 8.84E-05 |
| GENEBODY | MST1R            | 3  | 49938721/4993800<br>4/49939703                                          | 3 | cg01917209/cg15211<br>623/cg18292904                                          | 0.72026333 | 0.5503557  | 0.421140836 | -0.1699076 | 2.66E-06 | 5.78E-05 |

|          |           |    |                                         |   |                                                        |            |            |             |            |          |             |
|----------|-----------|----|-----------------------------------------|---|--------------------------------------------------------|------------|------------|-------------|------------|----------|-------------|
| GENEBODY | NDST3     | 4  | 119093021/118975504/119095240           | 3 | cg06837981/cg12311175/cg26126295                       | 0.57959507 | 0.42620212 | 0.344429245 | -0.1533929 | 1.75E-04 | 1.00E-03    |
| GENEBODY | ORMDL2    | 12 | 56213916                                | 1 | cg27554856                                             | 0.88013005 | 0.72482816 | 0.691191491 | -0.1553019 | 7.11E-05 | 5.07E-04    |
| GENEBODY | PATE3     | 11 | 125660444                               | 1 | cg24746315                                             | 0.74707571 | 0.58069167 | 0.517078341 | -0.166384  | 7.64E-04 | 3.23E-03    |
| GENEBODY | PRAC      | 17 | 46799640/46799479                       | 2 | cg12374721/cg14326989                                  | 0.24173976 | 0.45021132 | 0.256488038 | 0.20847155 | 5.30E-03 | 1.56E-02    |
| GENEBODY | PSMG3     | 7  | 1607787/1607868/1607601/1607408/1607663 | 5 | cg00375608/cg13042250/cg18958693/cg20151476/cg23903588 | 0.66348395 | 0.49326142 | 0.37804747  | -0.1702225 | 5.79E-07 | 2.49E-05    |
| GENEBODY | RSPH3     | 6  | 159420005/159416530                     | 2 | cg02895126/cg24249648                                  | 0.70916378 | 0.54519447 | 0.439121773 | -0.1639693 | 4.86E-06 | 8.38E-05    |
| GENEBODY | SBSN      | 19 | 36017061                                | 1 | cg06924602                                             | 0.56526531 | 0.38481138 | 0.283984809 | -0.1804539 | 2.11E-07 | 1.53E-05    |
| GENEBODY | SDR16C5   | 8  | 57228615                                | 1 | cg02141358                                             | 0.77667526 | 0.61986331 | 0.553771795 | -0.1568119 | 2.59E-06 | 5.73E-05    |
| GENEBODY | SELV      | 19 | 40007922                                | 1 | cg23201817                                             | 0.60075549 | 0.44122896 | 0.375011618 | -0.1595265 | 1.18E-06 | 3.68E-05    |
| GENEBODY | SLC22A25  | 11 | 62947565                                | 1 | cg21961694                                             | 0.58823213 | 0.39719341 | 0.254938509 | -0.1910387 | 1.07E-05 | 1.35E-04    |
| GENEBODY | ST3GAL1   | 8  | 134474257/134475410                     | 2 | cg12292213/cg14640789                                  | 0.76999565 | 0.53557833 | 0.411137514 | -0.2344173 | 1.76E-06 | 4.58E-05    |
| GENEBODY | SUSD5     | 3  | 33259920/33245094/33259889              | 3 | cg10906602/cg15469655/cg26298814                       | 0.25051059 | 0.41002647 | 0.54748555  | 0.15951589 | 1.67E-03 | 6.09E-03    |
| GENEBODY | TEX15     | 8  | 30691170                                | 1 | cg26631437                                             | 0.62286601 | 0.45349208 | 0.33232755  | -0.1693739 | 6.96E-06 | 1.04E-04    |
| GENEBODY | TST       | 22 | 37414044/37412173/37414747/37414442     | 4 | cg01419582/cg01553653/cg08727202/cg17575915            | 0.74000971 | 0.56872129 | 0.472251452 | -0.1712884 | 6.97E-07 | 2.71E-05    |
| GENEBODY | WDR64     | 1  | 241912764/241912510/241912768           | 3 | cg05940691/cg06082598/cg07233230                       | 0.88346178 | 0.72821386 | 0.780308389 | -0.1552479 | 7.50E-04 | 3.18E-03    |
| GENEBODY | ZNF563    | 19 | 12440923/12444273                       | 2 | cg13402083/cg25682920                                  | 0.75270955 | 0.57215202 | 0.47094505  | -0.1805575 | 4.23E-10 | 2.44E-06    |
| UTR3     | APCDD1    | 18 | 10488229                                | 1 | cg18208602                                             | 0.75776442 | 0.59104243 | 0.443936245 | -0.166722  | 5.98E-06 | 1.49E-04    |
| UTR3     | ARRDC5    | 19 | 4890970                                 | 1 | cg10130497                                             | 0.64906054 | 0.49272441 | 0.345601477 | -0.1563361 | 7.25E-06 | 1.65E-04    |
| UTR3     | ASB15     | 7  | 123277601                               | 1 | cg02621087                                             | 0.69356255 | 0.53329156 | 0.408837964 | -0.160271  | 3.33E-06 | 0.000110987 |
| UTR3     | C10orf128 | 10 | 50363896                                | 1 | cg25921502                                             | 0.56676901 | 0.40965711 | 0.286231195 | -0.1571119 | 2.03E-06 | 8.54E-05    |
| UTR3     | C1S       | 12 | 7178171                                 | 1 | cg24212392                                             | 0.72310005 | 0.56616341 | 0.452192391 | -0.1569366 | 3.12E-07 | 3.20E-05    |
| UTR3     | C3orf32   | 3  | 8661519                                 | 1 | cg09248934                                             | 0.56862798 | 0.36792397 | 0.268243714 | -0.200704  | 2.77E-08 | 1.29E-05    |
| UTR3     | CCDC46    | 17 | 63632069                                | 1 | cg11989257                                             | 0.86697215 | 0.70537346 | 0.653869918 | -0.1615987 | 1.71E-06 | 7.88E-05    |
| UTR3     | CCDC74B   | 2  | 130897120                               | 1 | cg15638768                                             | 0.67402883 | 0.51184596 | 0.451492682 | -0.1621829 | 7.08E-09 | 6.57E-06    |
| UTR3     | CD1D      | 1  | 158155757                               | 1 | cg18234111                                             | 0.57826903 | 0.39269838 | 0.269737286 | -0.1855707 | 5.39E-06 | 1.39E-04    |
| UTR3     | CD300LF   | 17 | 72690539                                | 1 | cg08808817                                             | 0.71191849 | 0.54756676 | 0.448119541 | -0.1643517 | 4.40E-06 | 1.23E-04    |
| UTR3     | CDC7      | 1  | 91990662                                | 1 | cg22013790                                             | 0.81067116 | 0.65403663 | 0.662419995 | -0.1566345 | 5.89E-08 | 1.55E-05    |

|      |         |    |                                                         |   |                                                                                         |            |            |             |            |          |             |
|------|---------|----|---------------------------------------------------------|---|-----------------------------------------------------------------------------------------|------------|------------|-------------|------------|----------|-------------|
| UTR3 | CDH13   | 16 | 83829911                                                | 1 | cg05847519                                                                              | 0.67286552 | 0.47969204 | 0.321072532 | -0.1931735 | 2.81E-05 | 3.89E-04    |
| UTR3 | CENPQ   | 6  | 49460031                                                | 1 | cg14479014                                                                              | 0.80903437 | 0.61965753 | 0.547317405 | -0.1893768 | 3.34E-10 | 1.70E-06    |
| UTR3 | CHST10  | 2  | 101008576                                               | 1 | cg01660407                                                                              | 0.87220465 | 0.67662627 | 0.578576291 | -0.1955784 | 1.08E-06 | 6.10E-05    |
| UTR3 | CIB3    | 19 | 16272242                                                | 1 | cg01541846                                                                              | 0.66506362 | 0.51021043 | 0.394911218 | -0.1548532 | 1.89E-07 | 2.63E-05    |
| UTR3 | CLDN18  | 3  | 137750103                                               | 1 | cg09236311                                                                              | 0.64847136 | 0.48208906 | 0.334410223 | -0.1663823 | 4.61E-05 | 0.000545028 |
| UTR3 | CLEC4D  | 12 | 8674684                                                 | 1 | cg05582397                                                                              | 0.66002753 | 0.50319973 | 0.378058127 | -0.1568278 | 2.10E-05 | 3.24E-04    |
| UTR3 | CMTM1   | 16 | 66612955                                                | 1 | cg09849405                                                                              | 0.2045236  | 0.37778662 | 0.654003182 | 0.17326303 | 7.24E-03 | 2.64E-02    |
| UTR3 | CNDP1   | 18 | 72252164                                                | 1 | cg21700214                                                                              | 0.68480289 | 0.50947208 | 0.431826264 | -0.1753308 | 1.21E-05 | 0.000226317 |
| UTR3 | CPLX1   | 4  | 779173/778827/778924/779230/779691/779480/779880/779568 | 8 | cg05448404/cg06672737/cg06673130/cg06821199/cg07434284/cg17128947/cg17397631/cg18638914 | 0.37324724 | 0.5248243  | 0.645681274 | 0.15157706 | 1.45E-05 | 2.52E-04    |
| UTR3 | CRP     | 1  | 159682497                                               | 1 | cg04861230                                                                              | 0.58299582 | 0.42996221 | 0.335184786 | -0.1530336 | 5.74E-08 | 1.55E-05    |
| UTR3 | CXCL2   | 4  | 74963112                                                | 1 | cg01470535                                                                              | 0.58833002 | 0.43652258 | 0.34538545  | -0.1518074 | 5.59E-07 | 4.26E-05    |
| UTR3 | DAB1    | 1  | 57470853                                                | 1 | cg01421140                                                                              | 0.50178006 | 0.35161283 | 0.254225914 | -0.1501672 | 4.40E-06 | 1.23E-04    |
| UTR3 | DOCK2   | 5  | 169510081                                               | 1 | cg09175734                                                                              | 0.63747036 | 0.46170475 | 0.335555305 | -0.1757656 | 3.56E-06 | 1.13E-04    |
| UTR3 | EDNRA   | 4  | 148465429                                               | 1 | cg03573792                                                                              | 0.66495647 | 0.51416448 | 0.458468332 | -0.150792  | 4.54E-06 | 1.24E-04    |
| UTR3 | ELK4    | 1  | 205585639                                               | 1 | cg04105597                                                                              | 0.68138763 | 0.51863703 | 0.415228641 | -0.1627506 | 2.15E-07 | 2.68E-05    |
| UTR3 | FAM126A | 7  | 22982162                                                | 1 | cg27229764                                                                              | 0.83985201 | 0.64416748 | 0.495510705 | -0.1956845 | 2.33E-06 | 9.23E-05    |
| UTR3 | FAM153B | 5  | 175541958                                               | 1 | cg08252384                                                                              | 0.66048473 | 0.50497632 | 0.3864653   | -0.1555084 | 7.49E-06 | 1.68E-04    |
| UTR3 | FAM181A | 14 | 94395516                                                | 1 | cg18857951                                                                              | 0.73147512 | 0.55981623 | 0.464809332 | -0.1716589 | 1.76E-06 | 7.96E-05    |
| UTR3 | FAM26D  | 6  | 116879492                                               | 1 | cg25351588                                                                              | 0.72995594 | 0.51286077 | 0.382538236 | -0.2170952 | 1.77E-07 | 2.57E-05    |
| UTR3 | GALNT14 | 2  | 31133547                                                | 1 | cg10582371                                                                              | 0.56709419 | 0.40729544 | 0.319374855 | -0.1597987 | 1.61E-06 | 7.66E-05    |
| UTR3 | GHR     | 5  | 42720521                                                | 1 | cg18304305                                                                              | 0.62983734 | 0.44958044 | 0.387788564 | -0.1802569 | 9.85E-06 | 1.96E-04    |
| UTR3 | GP6     | 19 | 55526208                                                | 1 | cg27154418                                                                              | 0.78008026 | 0.60738721 | 0.41956515  | -0.172693  | 1.44E-03 | 7.34E-03    |
| UTR3 | GRM2    | 3  | 51752143                                                | 1 | cg11727252                                                                              | 0.77556587 | 0.61148758 | 0.5510914   | -0.1640783 | 7.77E-06 | 1.72E-04    |
| UTR3 | GYPC    | 2  | 127453782                                               | 1 | cg11611448                                                                              | 0.79602001 | 0.59034018 | 0.401720773 | -0.2056798 | 3.01E-05 | 4.09E-04    |
| UTR3 | GZMA    | 5  | 54406016                                                | 1 | cg05648002                                                                              | 0.67577133 | 0.51063234 | 0.356100214 | -0.165139  | 2.52E-07 | 2.82E-05    |
| UTR3 | HOXC9   | 12 | 54396990                                                | 1 | cg22679316                                                                              | 0.51111691 | 0.67966348 | 0.681937423 | 0.16854658 | 5.36E-06 | 0.000138764 |
| UTR3 | HOXD10  | 2  | 176984634                                               | 1 | cg06005169                                                                              | 0.51182921 | 0.34905639 | 0.349526773 | -0.1627728 | 1.72E-04 | 1.42E-03    |
| UTR3 | IFLTD1  | 12 | 25649090/25656194/25644389                              | 3 | cg06680863/cg11130955/cg21254753                                                        | 0.52038823 | 0.35288952 | 0.271136409 | -0.1674987 | 3.45E-06 | 1.13E-04    |
| UTR3 | IRF4    | 6  | 408730                                                  | 1 | cg16478536                                                                              | 0.67309126 | 0.51059167 | 0.359100409 | -0.1624996 | 2.28E-04 | 1.75E-03    |
| UTR3 | KCNMB1  | 5  | 169805583                                               | 1 | cg16425489                                                                              | 0.65433255 | 0.45722991 | 0.333462355 | -0.1971026 | 1.70E-06 | 7.87E-05    |
| UTR3 | KCTD7   | 7  | 66105984                                                | 1 | cg07522403                                                                              | 0.58708411 | 0.43470409 | 0.3336382   | -0.15238   | 4.16E-06 | 1.18E-04    |

|      |           |    |                                     |   |                                             |            |            |             |            |            |             |
|------|-----------|----|-------------------------------------|---|---------------------------------------------|------------|------------|-------------|------------|------------|-------------|
| UTR3 | KIAA1486  | 2  | 226518461                           | 1 | cg03731588                                  | 0.7869686  | 0.56651525 | 0.408501177 | -0.2204533 | 1.81E-07   | 2.57E-05    |
| UTR3 | KRTAP15-1 | 21 | 31813075                            | 1 | cg16812893                                  | 0.59362799 | 0.44057094 | 0.334187759 | -0.153057  | 3.64E-06   | 1.13E-04    |
| UTR3 | LASS3     | 15 | 100941674                           | 1 | cg27358936                                  | 0.64713756 | 0.48955094 | 0.428181414 | -0.1575866 | 2.69E-06   | 9.84E-05    |
| UTR3 | LCE1C     | 1  | 152777382                           | 1 | cg16011217                                  | 0.63745746 | 0.48433732 | 0.364683118 | -0.1531201 | 6.64E-06   | 1.58E-04    |
| UTR3 | LCE2A     | 1  | 152671707                           | 1 | cg16354520                                  | 0.54498256 | 0.37940957 | 0.252350123 | -0.165573  | 2.59E-06   | 9.69E-05    |
| UTR3 | MFAP5     | 12 | 8799841                             | 1 | cg19543296                                  | 0.88506451 | 0.71806728 | 0.608226045 | -0.1669972 | 9.45E-07   | 5.71E-05    |
| UTR3 | MMP16     | 8  | 89053427                            | 1 | cg02526439                                  | 0.60355949 | 0.43655326 | 0.351015227 | -0.1670062 | 1.44E-06   | 7.12E-05    |
| UTR3 | NCKAP1L   | 12 | 54936840                            | 1 | cg26787915                                  | 0.87019336 | 0.71703318 | 0.51087105  | -0.1531602 | 1.54E-05   | 2.63E-04    |
| UTR3 | NDRG4     | 16 | 58545502/58545770                   | 2 | cg04194840/cg26514728                       | 0.73900369 | 0.57622246 | 0.491452386 | -0.1627812 | 6.31E-05   | 6.89E-04    |
| UTR3 | NEU4      | 2  | 242758725                           | 1 | cg05195017                                  | 0.44223969 | 0.2641673  | 0.193258385 | -0.1780724 | 2.17E-04   | 1.70E-03    |
| UTR3 | NLRP14    | 11 | 7092719                             | 1 | cg07103673                                  | 0.60690567 | 0.39699801 | 0.296656455 | -0.2099077 | 5.53E-08   | 1.55E-05    |
| UTR3 | NUP43     | 6  | 150045504                           | 1 | cg00424166                                  | 0.76030968 | 0.60171094 | 0.534083577 | -0.1585987 | 8.66E-09   | 6.96E-06    |
| UTR3 | PABPC4L   | 4  | 135121050                           | 1 | cg15867829                                  | 0.66543919 | 0.51234776 | 0.362865264 | -0.1530914 | 4.51E-06   | 1.24E-04    |
| UTR3 | PANX3     | 11 | 124490178                           | 1 | cg10118227                                  | 0.79644059 | 0.60071637 | 0.471743309 | -0.1957242 | 2.55E-07   | 2.82E-05    |
| UTR3 | PGK2      | 6  | 49753577                            | 1 | cg02482438                                  | 0.54314964 | 0.39180955 | 0.281179145 | -0.1513401 | 1.59E-05   | 2.69E-04    |
| UTR3 | PLCL1     | 2  | 199013270                           | 1 | cg09349723                                  | 0.66798426 | 0.4970543  | 0.349158882 | -0.17093   | 9.47E-06   | 1.91E-04    |
| UTR3 | POLR1B    | 2  | 113333716                           | 1 | cg02614999                                  | 0.60449706 | 0.45309597 | 0.372716527 | -0.1514011 | 4.36E-07   | 3.77E-05    |
| UTR3 | POU4F2    | 4  | 147562073                           | 1 | cg21200539                                  | 0.37320488 | 0.54191748 | 0.697049414 | 0.1687126  | 0.00052295 | 0.003327761 |
| UTR3 | PROZ      | 13 | 113826554                           | 1 | cg02898500                                  | 0.80941878 | 0.63143543 | 0.659898791 | -0.1779833 | 1.55E-04   | 1.31E-03    |
| UTR3 | PXDN      | 2  | 1637068                             | 1 | cg10888111                                  | 0.8753676  | 0.59430805 | 0.438202605 | -0.2810596 | 2.80E-07   | 3.01E-05    |
| UTR3 | RBMXL2    | 11 | 7112356                             | 1 | cg06176750                                  | 0.65238308 | 0.45420675 | 0.274610925 | -0.1981763 | 3.24E-05   | 4.26E-04    |
| UTR3 | RHOJ      | 14 | 63757917                            | 1 | cg24186774                                  | 0.68639383 | 0.51543068 | 0.367702455 | -0.1709631 | 1.23E-05   | 2.28E-04    |
| UTR3 | RIMS2     | 8  | 105264286                           | 1 | cg07664999                                  | 0.5521154  | 0.37394201 | 0.249843391 | -0.1781734 | 3.31E-07   | 3.31E-05    |
| UTR3 | SELE      | 1  | 169693534                           | 1 | cg18229820                                  | 0.66968789 | 0.51538248 | 0.47013515  | -0.1543054 | 4.04E-08   | 1.39E-05    |
| UTR3 | SELV      | 19 | 40009835                            | 1 | cg07052524                                  | 0.61414098 | 0.45252968 | 0.299807617 | -0.1616113 | 6.77E-05   | 7.22E-04    |
| UTR3 | SIRPD     | 20 | 1514929                             | 1 | cg00472837                                  | 0.70686384 | 0.54144523 | 0.422869095 | -0.1654186 | 1.36E-05   | 2.41E-04    |
| UTR3 | SIX3      | 2  | 45172201/45172169/45172265/45172972 | 4 | cg03717442/cg08696165/cg16509777/cg23245620 | 0.3196168  | 0.47360698 | 0.553462845 | 0.15399019 | 2.57E-03   | 1.15E-02    |
| UTR3 | SLC26A4   | 7  | 107357932                           | 1 | cg06535968                                  | 0.72728662 | 0.55776256 | 0.438293591 | -0.1695241 | 1.88E-06   | 8.15E-05    |
| UTR3 | TCF15     | 20 | 584773                              | 1 | cg02939767                                  | 0.5923177  | 0.34688905 | 0.227455723 | -0.2454287 | 5.51E-07   | 4.26E-05    |
| UTR3 | TMEM134   | 11 | 67231878                            | 1 | cg07303548                                  | 0.61020254 | 0.45479691 | 0.32130235  | -0.1554056 | 4.87E-06   | 1.31E-04    |
| UTR3 | TMEM30A   | 6  | 75965559                            | 1 | cg11887083                                  | 0.74361467 | 0.57378759 | 0.550888273 | -0.1698271 | 1.03E-08   | 7.48E-06    |
| UTR3 | TMPRSS11A | 4  | 68776652                            | 1 | cg26673722                                  | 0.59197598 | 0.42410026 | 0.300292691 | -0.1678757 | 3.41E-06   | 1.12E-04    |
| UTR3 | TRPS1     | 8  | 116422845                           | 1 | cg18430465                                  | 0.63577677 | 0.47986874 | 0.343752909 | -0.155908  | 1.90E-05   | 3.01E-04    |

|      |         |    |                         |   |                           |            |            |             |            |          |          |
|------|---------|----|-------------------------|---|---------------------------|------------|------------|-------------|------------|----------|----------|
| UTR3 | TSC22D1 | 13 | 45008447/4500852<br>6   | 2 | cg03097389/cg17600<br>231 | 0.80057919 | 0.62008318 | 0.527408509 | -0.180496  | 7.18E-07 | 4.76E-05 |
| UTR3 | UGT3A1  | 5  | 35954233                | 1 | cg17210837                | 0.50550368 | 0.34167663 | 0.250504545 | -0.1638271 | 3.83E-08 | 1.39E-05 |
| UTR3 | UNC5C   | 4  | 96090330                | 1 | cg03024478                | 0.62998052 | 0.46755009 | 0.362151282 | -0.1624304 | 1.81E-05 | 2.93E-04 |
| UTR3 | USH2A   | 1  | 216348212/215796<br>556 | 2 | cg00972761/cg14964<br>274 | 0.67150538 | 0.49637768 | 0.362080127 | -0.1751277 | 2.36E-05 | 3.49E-04 |
| UTR3 | VCAM1   | 1  | 101204337               | 1 | cg22454770                | 0.65708404 | 0.50568061 | 0.373783205 | -0.1514034 | 2.40E-06 | 9.41E-05 |
| UTR3 | ZAR1    | 4  | 48496404                | 1 | cg22289785                | 0.57601956 | 0.42430389 | 0.342240323 | -0.1517157 | 1.43E-08 | 9.14E-06 |
| UTR3 | ZNF470  | 19 | 57091383                | 1 | cg09287295                | 0.71308506 | 0.53275462 | 0.3893565   | -0.1803304 | 1.17E-05 | 2.20E-04 |
| UTR3 | ZSCAN5A | 19 | 56732932                | 1 | cg17767567                | 0.73060592 | 0.56120494 | 0.473755191 | -0.169401  | 4.28E-07 | 3.77E-05 |

---

Table S3. Differentially methylated regions (DMRs) between high grade adenoma (HGA) and Normal samples

| Location | Gene    | CHR | MAPINFO                                                                         | Number of sites | Designed Probes                                                                         | Normal      | LGA         | HGA         | Different $\beta$ | P value  | Adjusted P value |
|----------|---------|-----|---------------------------------------------------------------------------------|-----------------|-----------------------------------------------------------------------------------------|-------------|-------------|-------------|-------------------|----------|------------------|
| TSS1500  | MARCH1  | 4   | 165304842/165305815/165304855/165305050/165305334/165305022/165305238/165305314 | 8               | cg02990869/cg06166885/cg07160277/cg10453719/cg17310600/cg18685561/cg19037454/cg25291004 | 0.486301355 | 0.548860102 | 0.642036755 | 0.1557354         | 3.86E-08 | 2.77E-07         |
| TSS1500  | MARCH11 | 5   | 16180315/16180393/16180419/16180259/16181039/16180266                           | 6               | cg11452391/cg12456714/cg16182986/cg18325622/cg21582253/cg23065934                       | 0.410983289 | 0.468445128 | 0.595432839 | 0.18444955        | 2.55E-07 | 1.45E-06         |
| TSS1500  | A1CF    | 10  | 52645847                                                                        | 1               | cg16531903                                                                              | 0.498551665 | 0.390118706 | 0.30903515  | -0.189516515      | 1.91E-10 | 3.89E-09         |
| TSS1500  | A2M     | 12  | 9269178/9269671                                                                 | 2               | cg00134295/cg00146928                                                                   | 0.40638476  | 0.299459397 | 0.221163832 | -0.185220928      | 1.34E-13 | 5.30E-11         |
| TSS1500  | A2ML1   | 12  | 8973966/8974844/8974786                                                         | 3               | cg12168926/cg15769388/cg23546356                                                        | 0.593964413 | 0.502333325 | 0.41010355  | -0.183860863      | 1.62E-10 | 3.43E-09         |
| TSS1500  | A4GNT   | 3   | 137851874/137852643/137851776                                                   | 3               | cg18931888/cg19734045/cg23669440                                                        | 0.585866555 | 0.413583856 | 0.304446464 | -0.281420091      | 6.45E-12 | 4.20E-10         |
| TSS1500  | ABCC11  | 16  | 48269349/48269424/48269819                                                      | 3               | cg04388863/cg08404739/cg09147400                                                        | 0.5984097   | 0.486570378 | 0.408502702 | -0.189906998      | 4.18E-12 | 3.36E-10         |
| TSS1500  | ABCC13  | 21  | 15645787/15645810/15645649                                                      | 3               | cg18631692/cg19211382/cg23322112                                                        | 0.707675485 | 0.621322794 | 0.530965095 | -0.17671039       | 1.75E-08 | 1.42E-07         |
| TSS1500  | ABHD8   | 19  | 17414977/17414770/17415626/17415155                                             | 4               | cg01445659/cg04614656/cg08702612/cg17328880                                             | 0.544542253 | 0.449392267 | 0.385518386 | -0.159023866      | 8.16E-12 | 4.90E-10         |
| TSS1500  | ABRA    | 8   | 107783270/107782734                                                             | 2               | cg07067773/cg17049320                                                                   | 0.64380502  | 0.579914133 | 0.461314023 | -0.182490997      | 2.11E-08 | 1.66E-07         |
| TSS1500  | ACAN    | 15  | 89346205/89345688/89346269                                                      | 3               | cg06675190/cg14914908/cg27621340                                                        | 0.42568255  | 0.500547817 | 0.614764559 | 0.189082009       | 8.81E-09 | 7.95E-08         |
| TSS1500  | ACCSL   | 11  | 44068709/44069008/44068491                                                      | 3               | cg08403064/cg14686207/cg15035528                                                        | 0.48815877  | 0.414019125 | 0.31807552  | -0.17008325       | 6.77E-08 | 4.52E-07         |
| TSS1500  | ACIN1   | 14  | 23565052/23565044/23541523/23565029                                             | 4               | cg00855938/cg00884794/cg09367198/cg1819429                                              | 0.470758145 | 0.4121575   | 0.316091795 | -0.15466635       | 4.56E-09 | 4.68E-08         |
| TSS1500  | ACMSD   | 2   | 135594780/135595323/135595627                                                   | 3               | cg02499308/cg02812142/cg18766847                                                        | 0.556894303 | 0.470244541 | 0.360534591 | -0.196359712      | 3.12E-09 | 3.42E-08         |
| TSS1500  | ACOT2   | 14  | 74034619/74035398/74034893                                                      | 3               | cg07179457/cg20067142/cg25598083                                                        | 0.49342484  | 0.359211117 | 0.279924964 | -0.213499876      | 2.39E-10 | 4.61E-09         |
| TSS1500  | ACR     | 22  | 51176407/51175515/51175364                                                      | 3               | cg05615487/cg25232725/cg26034629                                                        | 0.644708405 | 0.553545344 | 0.4231613   | -0.221547105      | 4.55E-09 | 4.68E-08         |

|         |          |    |                                                                                                                                                 |    |                                                                                                                                                                                                       |             |             |             |              |            |             |
|---------|----------|----|-------------------------------------------------------------------------------------------------------------------------------------------------|----|-------------------------------------------------------------------------------------------------------------------------------------------------------------------------------------------------------|-------------|-------------|-------------|--------------|------------|-------------|
| TSS1500 | ACSBG2   | 19 | 6134933/6135279                                                                                                                                 | 2  | cg01452549/cg27274989                                                                                                                                                                                 | 0.697282073 | 0.5711237   | 0.491302093 | -0.205979979 | 9.97E-10   | 1.37E-08    |
| TSS1500 | ACSL3    | 2  | 223725497/223725459/223724754                                                                                                                   | 3  | cg03954616/cg21498125/cg23325384                                                                                                                                                                      | 0.47301181  | 0.388806661 | 0.297538968 | -0.175472842 | 3.88E-10   | 6.61E-09    |
| TSS1500 | ACSM5    | 16 | 20420652/20420222                                                                                                                               | 2  | cg04428453/cg06686156                                                                                                                                                                                 | 0.758055383 | 0.658663292 | 0.5910735   | -0.166981883 | 5.93E-09   | 5.77E-08    |
| TSS1500 | ACSS3    | 12 | 81471419/81471311/81471533                                                                                                                      | 3  | cg00354572/cg08314603/cg25971727                                                                                                                                                                      | 0.21885051  | 0.4004886   | 0.471809096 | 0.252958586  | 1.12E-07   | 7.01E-07    |
| TSS1500 | ACTA1    | 1  | 229570057/229570665/229570188/229570052/229570288/229570230                                                                                     | 6  | cg00064261/cg04900080/cg07777790/cg11689813/cg12908399/cg20025656                                                                                                                                     | 0.283263839 | 0.304019213 | 0.43376713  | 0.150503291  | 6.92E-06   | 2.64E-05    |
| TSS1500 | ACTL9    | 19 | 8810253/8810115/8810154                                                                                                                         | 3  | cg02339243/cg12148774/cg19611002                                                                                                                                                                      | 0.668944728 | 0.576734089 | 0.482399359 | -0.186545369 | 1.17E-10   | 2.74E-09    |
| TSS1500 | ACTR3C   | 7  | 150021553/150001179/150021488/150021518                                                                                                         | 4  | cg01234517/cg18222543/cg21577356/cg24474409                                                                                                                                                           | 0.561481453 | 0.449447733 | 0.369773582 | -0.191707871 | 4.04E-10   | 6.77E-09    |
| TSS1500 | ADAM18   | 8  | 39441473                                                                                                                                        | 1  | cg27485269                                                                                                                                                                                            | 0.598169635 | 0.507976156 | 0.395113705 | -0.20305593  | 7.57E-09   | 7.00E-08    |
| TSS1500 | ADAM21   | 14 | 70923456                                                                                                                                        | 1  | cg03512208                                                                                                                                                                                            | 0.75156432  | 0.675034067 | 0.576029118 | -0.175535202 | 0.00026014 | 0.000700924 |
| TSS1500 | ADAM21P1 | 14 | 70715926/70715730                                                                                                                               | 2  | cg19992629/cg20576094                                                                                                                                                                                 | 0.798079973 | 0.721657458 | 0.63929822  | -0.158781752 | 5.80E-10   | 8.92E-09    |
| TSS1500 | ADAM7    | 8  | 24297818/24297103                                                                                                                               | 2  | cg08383526/cg17897391                                                                                                                                                                                 | 0.665746573 | 0.578878569 | 0.496065175 | -0.169681398 | 1.99E-06   | 8.75E-06    |
| TSS1500 | ADAMTS16 | 5  | 5140029/5139626/5140003/5139878/5139610/5139510/5139069/5139866/5139855/5139334/5139874/5139797/5139512/5139508/5139643/5140001/5139458/5139853 | 18 | cg00127167/cg01085224/cg03209854/cg04136610/cg07834743/cg10881764/cg13603589/cg15048991/cg15409013/cg16068490/cg16508480/cg16670809/cg18503643/cg19452011/cg19813025/cg22954449/cg25536014/cg25973534 | 0.41784288  | 0.516642298 | 0.651251281 | 0.233408402  | 4.85E-11   | 1.51E-09    |
| TSS1500 | ADAMTS20 | 12 | 43946880/43945998/43946341/43946518/43946284/43946493                                                                                           | 6  | cg00938429/cg01345315/cg17459298/cg21911301/cg24116870/cg24606791                                                                                                                                     | 0.554121641 | 0.629093916 | 0.705131964 | 0.151010323  | 2.89E-10   | 5.32E-09    |

|         |           |    |                                                                           |                                                                                                         |             |             |             |              |          |          |
|---------|-----------|----|---------------------------------------------------------------------------|---------------------------------------------------------------------------------------------------------|-------------|-------------|-------------|--------------|----------|----------|
| TSS1500 | ADAMTS5   | 21 | 28340304/2834013<br>9/28339711/283397 5<br>05/28339907                    | cg02462195/cg02800<br>810/cg07942598/cg1<br>8895813/cg21646598                                          | 0.364109825 | 0.427270481 | 0.557634634 | 0.193524809  | 7.27E-08 | 4.80E-07 |
| TSS1500 | ADARB2    | 10 | 1779930/1780184/1<br>780263/1779972/17 5<br>80003                         | cg02270183/cg02609<br>848/cg17000076/cg1<br>8727303/cg23684973                                          | 0.12260361  | 0.2097999   | 0.334762288 | 0.212158678  | 3.25E-06 | 1.35E-05 |
| TSS1500 | ADCY1     | 7  | 45613825/4561375<br>2/45613725/456134 5<br>10/45613676                    | cg04028634/cg13070<br>193/cg13523557/cg2<br>4676071/cg26459372                                          | 0.212489829 | 0.274238133 | 0.41812544  | 0.205635611  | 6.76E-08 | 4.52E-07 |
| TSS1500 | ADCY8     | 8  | 132053823/132053<br>262/132053773/132 4<br>053780                         | cg01245966/cg02842<br>496/cg07312654/cg2<br>6351229                                                     | 0.356303169 | 0.448107531 | 0.586348588 | 0.230045419  | 4.96E-10 | 7.93E-09 |
| TSS1500 | ADCYAP1   | 18 | 904963/904899/904<br>851/904920/904523 8<br>/904885/904878/90<br>3764     | cg11850773/cg15458<br>338/cg16457786/cg1<br>8319029/cg19962990<br>/cg21438101/cg2428<br>7438/cg25911901 | 0.266016248 | 0.37385272  | 0.514081076 | 0.248064829  | 6.33E-07 | 3.20E-06 |
| TSS1500 | ADCYAP1R1 | 7  | 31091245/3109182<br>5/31091813/310917 4<br>18                             | cg00256593/cg17617<br>930/cg20165074/cg2<br>7076139                                                     | 0.121036297 | 0.162474221 | 0.386411279 | 0.265374982  | 6.44E-07 | 3.25E-06 |
| TSS1500 | ADH1A     | 4  | 100212536/100212 2<br>502                                                 | cg03806087/cg23949<br>936                                                                               | 0.63870982  | 0.558197378 | 0.429118041 | -0.209591779 | 2.03E-10 | 4.09E-09 |
| TSS1500 | ADH6      | 4  | 100140905 1                                                               | cg07219303                                                                                              | 0.36205541  | 0.274296989 | 0.207151132 | -0.154904278 | 7.15E-09 | 6.67E-08 |
| TSS1500 | ADORA2A   | 22 | 24823141/2482311<br>0/24823050/248228 4<br>02                             | cg04250930/cg15499<br>799/cg26001125/cg2<br>6354221                                                     | 0.765259763 | 0.679375379 | 0.55487363  | -0.210386133 | 2.77E-11 | 1.03E-09 |
| TSS1500 | ADRA1A    | 8  | 26723946/2672423<br>4/26723584/267233 5<br>65/26724001                    | cg00460235/cg03651<br>608/cg22295787/cg2<br>2461835/cg26730369                                          | 0.273442668 | 0.324968076 | 0.469693704 | 0.196251036  | 8.14E-09 | 7.45E-08 |
| TSS1500 | ADSSL1    | 14 | 105190158/105195<br>816/105189737/105 6<br>189936/105195480/<br>105194980 | cg02043070/cg02263<br>377/cg04578317/cg1<br>3636887/cg20546518<br>/cg25954705                           | 0.496639282 | 0.409192559 | 0.312430763 | -0.184208519 | 2.69E-10 | 5.03E-09 |
| TSS1500 | AEBP1     | 7  | 44142973/4414329 3<br>0/44143438                                          | cg06852744/cg08495<br>088/cg12955216                                                                    | 0.72110375  | 0.626615009 | 0.546929333 | -0.174174417 | 3.20E-10 | 5.72E-09 |
| TSS1500 | AFAP1     | 4  | 7941894/7942031/7 3<br>942020                                             | cg10028549/cg18688<br>746/cg19702703                                                                    | 0.61293722  | 0.502182494 | 0.433697123 | -0.179240097 | 4.60E-08 | 3.24E-07 |



|         |         |    |                                              |   |                                                        |             |             |             |              |             |             |
|---------|---------|----|----------------------------------------------|---|--------------------------------------------------------|-------------|-------------|-------------|--------------|-------------|-------------|
| TSS1500 | AFAP1L2 | 10 | 116165190/116164955/116164849                | 3 | cg11453400/cg15657704/cg20196291                       | 0.44985006  | 0.358432519 | 0.29841968  | -0.15143038  | 5.90E-10    | 9.04E-09    |
| TSS1500 | AGR2    | 7  | 16845331                                     | 1 | cg12565635                                             | 0.558866275 | 0.408002306 | 0.323608105 | -0.23525817  | 3.24E-11    | 1.15E-09    |
| TSS1500 | AICDA   | 12 | 8766467/8766941                              | 2 | cg10465202/cg27562311                                  | 0.756507785 | 0.647370642 | 0.488450232 | -0.268057553 | 1.21E-09    | 1.60E-08    |
| TSS1500 | AJAP1   | 1  | 4714672/4714033/4714171/4714574/4714008      | 5 | cg12475759/cg13495205/cg15484532/cg17741689/cg20959866 | 0.358840883 | 0.457001437 | 0.596548438 | 0.237707555  | 6.61E-12    | 4.28E-10    |
| TSS1500 | AKR1B1  | 7  | 134144288/134144106/134144118                | 3 | cg04663564/cg08167706/cg23918923                       | 0.33867475  | 0.432639777 | 0.511341922 | 0.172667172  | 0.001061435 | 0.002519034 |
| TSS1500 | AKR1CL1 | 10 | 5228106/5227757                              | 2 | cg13585175/cg14011422                                  | 0.56437276  | 0.47936385  | 0.391363427 | -0.173009333 | 2.33E-11    | 8.97E-10    |
| TSS1500 | ALX1    | 12 | 85673200/85673221/85673270/85672623/85673347 | 5 | cg03781931/cg13916459/cg14996220/cg16413687/cg25800765 | 0.393886586 | 0.488537192 | 0.58970695  | 0.195820365  | 1.40E-08    | 1.17E-07    |

|         |         |    |                                                                                                                                                                                                                                                                                                                                                                                                                                                   |                                                                                                                                                                                                                                                                                                                                                                                                                                                                                                                                          |             |             |             |              |          |          |
|---------|---------|----|---------------------------------------------------------------------------------------------------------------------------------------------------------------------------------------------------------------------------------------------------------------------------------------------------------------------------------------------------------------------------------------------------------------------------------------------------|------------------------------------------------------------------------------------------------------------------------------------------------------------------------------------------------------------------------------------------------------------------------------------------------------------------------------------------------------------------------------------------------------------------------------------------------------------------------------------------------------------------------------------------|-------------|-------------|-------------|--------------|----------|----------|
| TSS1500 | ALX4    | 11 | 44333030/4433265<br>3/44332454/443321<br>38/44332216/44333<br>072/44332385/4433<br>2790/44332636/443<br>32664/44332369/44<br>332938/44332340/4<br>4332940/44333067/<br>44332195/4433291<br>3/44333070/443325<br>40/44332224/44332 39<br>134/44331978/4433<br>3131/44332958/443<br>32719/44332972/44<br>332838/44332624/4<br>4332891/44332332/<br>44332558/4433193<br>4/44332756/443326<br>85/44332128/44333<br>192/44332507/4433<br>2754/44332849 | cg00221654/cg00268<br>840/cg00374839/cg0<br>1483681/cg01564033<br>/cg02184008/cg0344<br>2378/cg04367252/cg<br>04367345/cg0457877<br>4/cg04858155/cg062<br>45037/cg07462292/c<br>g07704934/cg081491<br>93/cg09649245/cg10<br>749822/cg11391201/<br>cg13807496/cg14252<br>492/cg14410064/cg1<br>4868747/cg15786900<br>/cg16065899/cg1612<br>5371/cg16321280/cg<br>17471467/cg1832154<br>8/cg18486698/cg190<br>20830/cg21704109/c<br>g21937554/cg219789<br>24/cg22974228/cg23<br>385200/cg24008884/<br>cg24362098/cg26717<br>041/cg27318318 | 0.278009027 | 0.337785395 | 0.472054544 | 0.194045516  | 5.51E-08 | 3.78E-07 |
| TSS1500 | AMTN    | 4  | 71382958/7138399<br>9 2                                                                                                                                                                                                                                                                                                                                                                                                                           | cg15964593/cg17536<br>071                                                                                                                                                                                                                                                                                                                                                                                                                                                                                                                | 0.50848989  | 0.419287194 | 0.338948332 | -0.169541558 | 1.87E-06 | 8.24E-06 |
| TSS1500 | ANGEL2  | 1  | 213189641/213189<br>823/213190571/213 4<br>189773                                                                                                                                                                                                                                                                                                                                                                                                 | cg14610958/cg19863<br>073/cg21951459/cg2<br>4410391                                                                                                                                                                                                                                                                                                                                                                                                                                                                                      | 0.805590036 | 0.70427454  | 0.59785071  | -0.207739326 | 1.74E-09 | 2.14E-08 |
| TSS1500 | ANKRD22 | 10 | 90612232/9061222<br>8/90613015 3                                                                                                                                                                                                                                                                                                                                                                                                                  | cg00103806/cg03818<br>395/cg24065504                                                                                                                                                                                                                                                                                                                                                                                                                                                                                                     | 0.498195385 | 0.400352393 | 0.339889011 | -0.158306374 | 4.52E-10 | 7.37E-09 |
| TSS1500 | ANO2    | 12 | 6056169/6056330/6<br>056642 3                                                                                                                                                                                                                                                                                                                                                                                                                     | cg12666919/cg16451<br>358/cg23363039                                                                                                                                                                                                                                                                                                                                                                                                                                                                                                     | 0.67893045  | 0.618869761 | 0.515809315 | -0.163121135 | 7.26E-08 | 4.80E-07 |
| TSS1500 | APCS    | 1  | 159556997/159557<br>257 2                                                                                                                                                                                                                                                                                                                                                                                                                         | cg05919685/cg13968<br>061                                                                                                                                                                                                                                                                                                                                                                                                                                                                                                                | 0.367865315 | 0.254767489 | 0.176404172 | -0.191461143 | 6.59E-11 | 1.81E-09 |
| TSS1500 | APOA2   | 1  | 161193991/161193<br>965/161193933/161 4<br>194369                                                                                                                                                                                                                                                                                                                                                                                                 | cg01053621/cg08922<br>317/cg18281418/cg2<br>7433062                                                                                                                                                                                                                                                                                                                                                                                                                                                                                      | 0.719119685 | 0.622324496 | 0.535912568 | -0.183207117 | 8.82E-10 | 1.24E-08 |
| TSS1500 | APOBEC1 | 12 | 7819180 1                                                                                                                                                                                                                                                                                                                                                                                                                                         | cg16879115                                                                                                                                                                                                                                                                                                                                                                                                                                                                                                                               | 0.65364044  | 0.465226467 | 0.339518605 | -0.314121835 | 3.08E-13 | 7.87E-11 |

|         |          |    |                                                                                                               |   |                                                                                                                        |             |             |             |              |             |             |
|---------|----------|----|---------------------------------------------------------------------------------------------------------------|---|------------------------------------------------------------------------------------------------------------------------|-------------|-------------|-------------|--------------|-------------|-------------|
| TSS1500 | APOE     | 19 | 45408121/4540794<br>5/45407868                                                                                | 3 | cg01032398/cg04406<br>254/cg14123992                                                                                   | 0.516337348 | 0.427040581 | 0.35489253  | -0.161444818 | 3.06E-13    | 7.87E-11    |
| TSS1500 | AQP5     | 12 | 50354962/5035499<br>8/50353951/503548<br>40                                                                   | 4 | cg03020208/cg08266<br>366/cg19220825/cg2<br>6328335                                                                    | 0.300126293 | 0.318647856 | 0.47726052  | 0.177134227  | 3.12E-08    | 2.33E-07    |
| TSS1500 | ARFGAP3  | 22 | 43254081/4325416<br>8/43254043                                                                                | 3 | cg00539564/cg09367<br>092/cg23778094                                                                                   | 0.791412908 | 0.706126272 | 0.626928179 | -0.16448473  | 4.26E-07    | 2.26E-06    |
| TSS1500 | ARHGAP20 | 11 | 110584063/110584<br>082/110583662/110<br>583882/110584327/<br>110583945                                       | 6 | cg03110368/cg03927<br>037/cg04282419/cg0<br>4417028/cg06106428<br>/cg08012199                                          | 0.273987107 | 0.343640627 | 0.445062776 | 0.171075669  | 0.000153952 | 0.000434981 |
| TSS1500 | ARHGAP28 | 18 | 6833417                                                                                                       | 1 | cg03026004                                                                                                             | 0.531716005 | 0.343916939 | 0.202823204 | -0.328892801 | 7.12E-15    | 1.50E-11    |
| TSS1500 | ARID5A   | 2  | 97202260/9720119<br>6                                                                                         | 2 | cg02085953/cg06496<br>010                                                                                              | 0.648115905 | 0.531712394 | 0.495789245 | -0.15232666  | 1.28E-07    | 7.92E-07    |
| TSS1500 | ARMC3    | 10 | 23216727/2321669<br>5/23216637                                                                                | 3 | cg11673092/cg19542<br>987/cg22631555                                                                                   | 0.177264821 | 0.293968522 | 0.417631586 | 0.240366765  | 1.93E-05    | 6.67E-05    |
| TSS1500 | ARRDC5   | 19 | 4903909/4903179/4<br>903952                                                                                   | 3 | cg02701435/cg12255<br>509/cg22898924                                                                                   | 0.775775478 | 0.698670139 | 0.619307659 | -0.156467818 | 1.42E-08    | 1.19E-07    |
| TSS1500 | ASAP1    | 8  | 131414474/131414<br>614/131415376                                                                             | 3 | cg00077877/cg00659<br>129/cg18582010                                                                                   | 0.68526912  | 0.545931603 | 0.449298914 | -0.235970206 | 1.17E-09    | 1.56E-08    |
| TSS1500 | ASB10    | 7  | 150885654/150884<br>979/150885084/150<br>885361/150885458/<br>150885027/150885<br>103/150884848/150<br>884914 | 9 | cg01954686/cg04671<br>739/cg05181846/cg0<br>7609372/cg09539720<br>/cg10980293/cg1364<br>5954/cg16537044/cg<br>26159905 | 0.511255849 | 0.413287321 | 0.321359829 | -0.189896019 | 5.26E-13    | 9.59E-11    |
| TSS1500 | ASB4     | 7  | 95114680/9511502<br>6                                                                                         | 2 | cg02395581/cg09375<br>488                                                                                              | 0.579556483 | 0.482327283 | 0.377546509 | -0.202009973 | 7.55E-11    | 1.98E-09    |
| TSS1500 | ASB5     | 4  | 177191536                                                                                                     | 1 | cg26417152                                                                                                             | 0.751656895 | 0.678414217 | 0.537736323 | -0.213920572 | 2.45E-05    | 8.28E-05    |
| TSS1500 | ASCL4    | 12 | 108167730/108167<br>502/108167448                                                                             | 3 | cg16207673/cg20173<br>428/cg20318358                                                                                   | 0.620546271 | 0.489181969 | 0.408143162 | -0.212403108 | 1.29E-10    | 2.92E-09    |
| TSS1500 | ASGR1    | 17 | 7083519/7083413/7<br>083257                                                                                   | 3 | cg09245073/cg13335<br>341/cg13808223                                                                                   | 0.622772678 | 0.54892322  | 0.468054705 | -0.154717974 | 3.76E-09    | 3.99E-08    |
| TSS1500 | ATAD3C   | 1  | 1384091/1384038                                                                                               | 2 | cg11405695/cg21001<br>441                                                                                              | 0.44518399  | 0.346447419 | 0.285277195 | -0.159906795 | 1.23E-10    | 2.82E-09    |
| TSS1500 | ATG5     | 6  | 106774064/106773<br>949/106774172                                                                             | 3 | cg09354267/cg14951<br>955/cg21148531                                                                                   | 0.522668297 | 0.469559404 | 0.354837779 | -0.167830518 | 1.75E-09    | 2.14E-08    |
| TSS1500 | ATP13A5  | 3  | 193097361/193097<br>879/193096836/193<br>097750                                                               | 4 | cg01748263/cg05503<br>824/cg09449853/cg2<br>4935655                                                                    | 0.809145518 | 0.711243642 | 0.607231131 | -0.201914387 | 2.98E-09    | 3.31E-08    |

|         |          |    |                                             |   |                                                     |             |             |             |              |          |          |
|---------|----------|----|---------------------------------------------|---|-----------------------------------------------------|-------------|-------------|-------------|--------------|----------|----------|
| TSS1500 | ATP6V1G1 | 9  | 117349544/117349<br>621/117349316           | 3 | cg14391907/cg14535<br>884/cg21249829                | 0.497025258 | 0.413479222 | 0.33261612  | -0.164409137 | 4.22E-08 | 3.01E-07 |
| TSS1500 | ATP8A2   | 13 | 25945811/2594525<br>5/25945656/259454<br>13 | 4 | cg00044871/cg07973<br>479/cg17713780/cg2<br>6153234 | 0.677211385 | 0.581965215 | 0.492757221 | -0.184454164 | 2.27E-11 | 8.87E-10 |
| TSS1500 | ATP9B    | 18 | 76828521/7682865<br>5/76829143/768291<br>38 | 4 | cg06556497/cg16665<br>444/cg16961218/cg2<br>2093035 | 0.53972239  | 0.618516867 | 0.730038395 | 0.190316005  | 7.90E-09 | 7.27E-08 |
| TSS1500 | AVIL     | 12 | 58211193/5821066<br>1/58210878/582107<br>16 | 4 | cg01424889/cg04046<br>364/cg06317209/cg2<br>6620147 | 0.549930572 | 0.392942883 | 0.316282894 | -0.233647678 | 1.10E-12 | 1.54E-10 |
| TSS1500 | AZGP1    | 7  | 99574466/9957438<br>3/99574420              | 3 | cg10372302/cg12019<br>109/cg26680675                | 0.69409815  | 0.554441141 | 0.425508592 | -0.268589558 | 6.23E-12 | 4.16E-10 |
| TSS1500 | B3GALT1  | 2  | 168674769/168673<br>805/168674479           | 3 | cg00282195/cg10224<br>537/cg18015625                | 0.655533025 | 0.586083128 | 0.457510014 | -0.198023011 | 4.98E-06 | 1.97E-05 |
| TSS1500 | B3GNT5   | 3  | 182970719/182970<br>675/182970728           | 3 | cg21450829/cg26436<br>136/cg27324128                | 0.519082595 | 0.410640535 | 0.325359411 | -0.193723184 | 1.03E-10 | 2.49E-09 |
| TSS1500 | B3GNT6   | 11 | 76745087/7674497<br>0/76744076              | 3 | cg00721016/cg09933<br>401/cg10101468                | 0.614882115 | 0.504360372 | 0.4274087   | -0.187473415 | 2.20E-08 | 1.73E-07 |
| TSS1500 | BACH2    | 6  | 91007365/9100762<br>5/91007563              | 3 | cg09790829/cg10913<br>050/cg15380603                | 0.50720581  | 0.436758428 | 0.3537978   | -0.15340801  | 8.59E-09 | 7.80E-08 |
| TSS1500 | BAIAP2L2 | 22 | 38507451/3850785<br>7/38508132              | 3 | cg11461302/cg15944<br>459/cg21007971                | 0.621353555 | 0.527046708 | 0.438863032 | -0.182490523 | 1.76E-09 | 2.14E-08 |
| TSS1500 | BASE     | 20 | 31780882/3178115<br>1/31781060              | 3 | cg01775265/cg10637<br>995/cg12161192                | 0.553312482 | 0.464440576 | 0.371211789 | -0.182100692 | 1.75E-10 | 3.65E-09 |
| TSS1500 | BAT2L2   | 1  | 171454351/171453<br>943                     | 2 | cg00526163/cg10143<br>731                           | 0.536697805 | 0.424156072 | 0.264537845 | -0.27215996  | 2.00E-12 | 2.10E-10 |
| TSS1500 | BBOX1    | 11 | 27061533/2706189<br>9/27061756              | 3 | cg11832339/cg12805<br>865/cg19320730                | 0.527654537 | 0.429284387 | 0.343140339 | -0.184514197 | 1.65E-09 | 2.05E-08 |
| TSS1500 | BCL2A1   | 15 | 80264706/8026469<br>6/80264770              | 3 | cg23708261/cg24924<br>631/cg27177709                | 0.79074286  | 0.649559333 | 0.513380041 | -0.277362819 | 3.34E-09 | 3.62E-08 |
| TSS1500 | BCL2L15  | 1  | 114430903/114431<br>096/114431234           | 3 | cg08266106/cg13063<br>617/cg18941151                | 0.86143578  | 0.778888897 | 0.663659423 | -0.197776357 | 2.57E-07 | 1.46E-06 |
| TSS1500 | BET3L    | 6  | 116867006/116867<br>864                     | 2 | cg00953399/cg07258<br>838                           | 0.619891508 | 0.509587497 | 0.409660936 | -0.210230571 | 3.74E-10 | 6.45E-09 |
| TSS1500 | BEYLA    | 8  | 47751953/4775149<br>4/47751623              | 3 | cg00658449/cg07531<br>663/cg21767657                | 0.350532735 | 0.258877394 | 0.184446652 | -0.166086083 | 9.98E-12 | 5.31E-10 |

|         |        |    |                                                                                                                                                                                                                    |    |                                                                                                                                                                                                                                                              |             |             |             |              |             |             |
|---------|--------|----|--------------------------------------------------------------------------------------------------------------------------------------------------------------------------------------------------------------------|----|--------------------------------------------------------------------------------------------------------------------------------------------------------------------------------------------------------------------------------------------------------------|-------------|-------------|-------------|--------------|-------------|-------------|
| TSS1500 | BFSP2  | 3  | 133117569/133117<br>420/133118114                                                                                                                                                                                  | 3  | cg15081844/cg20383<br>064/cg22465341                                                                                                                                                                                                                         | 0.757362667 | 0.653993333 | 0.532930911 | -0.224431756 | 1.02E-08    | 8.97E-08    |
| TSS1500 | BLID   | 11 | 121987180/121987<br>155/121987203                                                                                                                                                                                  | 3  | cg13125488/cg15056<br>794/cg15598802                                                                                                                                                                                                                         | 0.748611845 | 0.656468039 | 0.543466927 | -0.205144918 | 0.000118404 | 0.000343568 |
| TSS1500 | BMP10  | 2  | 69100119/6909928<br>5/69099584                                                                                                                                                                                     | 3  | cg10881615/cg12711<br>530/cg16980530                                                                                                                                                                                                                         | 0.791024762 | 0.66490742  | 0.552936695 | -0.238088066 | 8.09E-10    | 1.16E-08    |
| TSS1500 | BMP2   | 20 | 6747409                                                                                                                                                                                                            | 1  | cg26665274                                                                                                                                                                                                                                                   | 0.55499735  | 0.439309483 | 0.357869023 | -0.197128327 | 1.05E-10    | 2.52E-09    |
| TSS1500 | BNC1   | 15 | 83954392/8395399<br>8/83953883/839539<br>29/83953780/83954<br>246/83953765/8395<br>4849/83954395/839<br>54150/83953880/83<br>953709/83953744/8<br>3953819/83954231/<br>83953775/8395386<br>4/83954229/839536<br>90 | 19 | cg00768409/cg02713<br>760/cg06523224/cg0<br>7016258/cg09180848<br>/cg10275315/cg1438<br>5245/cg14786290/cg<br>16049391/cg1625437<br>4/cg17124224/cg185<br>60204/cg18952647/c<br>g20941110/cg237415<br>20/cg26429925/cg26<br>654798/cg27169020/<br>cg27304406 | 0.418563902 | 0.507321721 | 0.597384941 | 0.178821039  | 1.10E-09    | 1.48E-08    |
| TSS1500 | BNIP3  | 10 | 133796348/133796<br>494/133796164/133<br>795885/133795796/ 8<br>133796523/133796<br>476/133796559                                                                                                                  | 8  | cg02388416/cg02835<br>981/cg02886408/cg0<br>8079580/cg11197015<br>/cg13599131/cg2176<br>2589/cg27353308                                                                                                                                                      | 0.473879868 | 0.544565964 | 0.639898829 | 0.166018961  | 4.70E-09    | 4.80E-08    |
| TSS1500 | BOK    | 2  | 242497595/242497<br>960                                                                                                                                                                                            | 2  | cg03558769/cg11374<br>368                                                                                                                                                                                                                                    | 0.530508728 | 0.428008608 | 0.368517734 | -0.161990993 | 4.07E-11    | 1.34E-09    |
| TSS1500 | BOLL   | 2  | 198651498/198650<br>880/198650985/198<br>651076/198650603/<br>198650752/198650<br>987/198651576/198<br>651303/198651347                                                                                            | 10 | cg00926400/cg03774<br>803/cg05783139/cg0<br>7495363/cg07734961<br>/cg10124201/cg1335<br>6896/cg16002818/cg<br>17560332/cg2458945<br>9                                                                                                                        | 0.410338441 | 0.486456147 | 0.65089284  | 0.240554398  | 1.50E-08    | 1.25E-07    |
| TSS1500 | BPIL3  | 20 | 31618468/3161820<br>9/31618931                                                                                                                                                                                     | 3  | cg00471000/cg00582<br>765/cg02309431                                                                                                                                                                                                                         | 0.699153855 | 0.607729461 | 0.532883032 | -0.166270823 | 3.44E-08    | 2.53E-07    |
| TSS1500 | BRD7P3 | 6  | 118822131/118821<br>449                                                                                                                                                                                            | 2  | cg01019344/cg24520<br>968                                                                                                                                                                                                                                    | 0.785562243 | 0.678681686 | 0.58263605  | -0.202926193 | 4.80E-10    | 7.73E-09    |
| TSS1500 | BRF2   | 8  | 37707692/3770860<br>9/37708905                                                                                                                                                                                     | 3  | cg19904653/cg20466<br>478/cg22871204                                                                                                                                                                                                                         | 0.46839186  | 0.316849877 | 0.205657763 | -0.262734097 | 3.23E-14    | 2.45E-11    |

|         |           |    |    |                                                                                                                                                                                                                                          |                                                                                                                                                                                                                                                                                        |             |             |             |              |          |          |
|---------|-----------|----|----|------------------------------------------------------------------------------------------------------------------------------------------------------------------------------------------------------------------------------------------|----------------------------------------------------------------------------------------------------------------------------------------------------------------------------------------------------------------------------------------------------------------------------------------|-------------|-------------|-------------|--------------|----------|----------|
| TSS1500 | BRUNOL4   | 18 | 21 | 35146726/3514639<br>3/35146770/351467<br>66/35146474/35146<br>589/35146478/3514<br>7090/35147162/351<br>46227/35147079/35<br>147056/35146591/3<br>5147276/35146668/<br>35147165/3514645<br>4/35147246/351466<br>70/35146450/35147<br>465 | cg00590960/cg01273<br>679/cg03151187/cg0<br>6103031/cg07600871<br>/cg12466737/cg1313<br>8137/cg13382322/cg<br>14350197/cg1483935<br>1/cg15179725/cg173<br>19486/cg17973164/c<br>g18409730/cg198538<br>33/cg20346912/cg23<br>243463/cg24107979/<br>cg24506862/cg25023<br>275/cg25216403 | 0.203256005 | 0.271151456 | 0.413594709 | 0.210338704  | 1.07E-05 | 3.91E-05 |
| TSS1500 | BSG       | 19 | 9  | 571107/571204/571<br>744/571321/571416<br>/571802/572309/57<br>1323/570458                                                                                                                                                               | cg01532103/cg05622<br>915/cg07513435/cg1<br>3578393/cg17522907<br>/cg18341969/cg2243<br>1486/cg25660646/cg<br>26529300                                                                                                                                                                 | 0.789319535 | 0.606996978 | 0.594050391 | -0.195269144 | 1.80E-05 | 6.27E-05 |
| TSS1500 | BTG4      | 11 | 11 | 111383668/111384<br>124/111384048/111<br>384223/111383603/<br>111383288/111383<br>576/111383515/111<br>383624/111383889/<br>111383653                                                                                                    | cg01192900/cg05281<br>603/cg08827001/cg0<br>9148270/cg13767940<br>/cg18515591/cg2188<br>1253/cg22879515/cg<br>23211240/cg2404107<br>8/cg26561785                                                                                                                                       | 0.197607313 | 0.243806879 | 0.403806738 | 0.206199425  | 1.13E-05 | 4.12E-05 |
| TSS1500 | BTNL2     | 6  | 6  | 32375231/3237531<br>7/32376095/323754<br>47/32376066/32375<br>672                                                                                                                                                                        | cg00978102/cg02158<br>755/cg06871764/cg1<br>4853443/cg18060330<br>/cg18067840                                                                                                                                                                                                          | 0.447310635 | 0.361828749 | 0.297159351 | -0.150151284 | 6.55E-10 | 9.80E-09 |
| TSS1500 | C10orf114 | 10 | 3  | 21787596/2178707<br>9/21786419                                                                                                                                                                                                           | cg10973934/cg18224<br>988/cg24823751                                                                                                                                                                                                                                                   | 0.558163741 | 0.478522211 | 0.384827344 | -0.173336397 | 1.00E-07 | 6.35E-07 |
| TSS1500 | C10orf67  | 10 | 1  | 23635200                                                                                                                                                                                                                                 | cg25844471                                                                                                                                                                                                                                                                             | 0.82135045  | 0.789701489 | 0.669210132 | -0.152140318 | 1.28E-05 | 4.61E-05 |
| TSS1500 | C10orf81  | 10 | 3  | 115510107/115510<br>718/115510928                                                                                                                                                                                                        | cg07941628/cg16526<br>673/cg22618337                                                                                                                                                                                                                                                   | 0.617620295 | 0.485419153 | 0.40333993  | -0.214280365 | 1.37E-10 | 3.05E-09 |
| TSS1500 | C10orf93  | 10 | 5  | 134756503/134756<br>306/134756610/134<br>756994/134756707                                                                                                                                                                                | cg03354772/cg07421<br>032/cg08325191/cg1<br>7000480/cg20100445                                                                                                                                                                                                                         | 0.357539535 | 0.466157022 | 0.583555727 | 0.226016192  | 2.59E-09 | 2.95E-08 |

|         |           |    |                                         |   |                                             |             |             |             |              |             |             |
|---------|-----------|----|-----------------------------------------|---|---------------------------------------------|-------------|-------------|-------------|--------------|-------------|-------------|
| TSS1500 | C10orf96  | 10 | 118083701/118082519                     | 2 | cg04827379/cg06640662                       | 0.779178033 | 0.741080519 | 0.618550866 | -0.160627167 | 3.42E-06    | 1.41E-05    |
| TSS1500 | C11orf49  | 11 | 46957888/46957977/46957758              | 3 | cg08941576/cg18100564/cg26198807            | 0.490478218 | 0.407150744 | 0.325264809 | -0.165213408 | 1.85E-09    | 2.24E-08    |
| TSS1500 | C12orf39  | 12 | 21678044/21678386                       | 2 | cg03833948/cg24957964                       | 0.661306323 | 0.520749944 | 0.394534359 | -0.266771963 | 1.62E-11    | 7.24E-10    |
| TSS1500 | C12orf56  | 12 | 64784663/64784686/64784626              | 3 | cg01031441/cg20116199/cg24990968            | 0.36124463  | 0.442400617 | 0.587324802 | 0.226080172  | 1.63E-08    | 1.34E-07    |
| TSS1500 | C13orf28  | 13 | 113030011/113029350/113030235           | 3 | cg03625684/cg04107005/cg14591352            | 0.61547812  | 0.52829282  | 0.437087852 | -0.178390268 | 4.08E-11    | 1.34E-09    |
| TSS1500 | C13orf29  | 13 | 111522975/111522932/111522865/111522985 | 4 | cg13531120/cg15703035/cg22131172/cg22790835 | 0.494284705 | 0.414499193 | 0.340627084 | -0.153657621 | 4.30E-07    | 2.28E-06    |
| TSS1500 | C13orf30  | 13 | 43354674/43354421/43354767              | 3 | cg07409200/cg18860329/cg26529044            | 0.550397928 | 0.484633502 | 0.38539901  | -0.164998918 | 2.20E-06    | 9.58E-06    |
| TSS1500 | C14orf118 | 14 | 76617755/76617402/76617983              | 3 | cg16333262/cg18373317/cg26082202            | 0.78633787  | 0.670777908 | 0.590537384 | -0.195800486 | 9.40E-10    | 1.31E-08    |
| TSS1500 | C14orf184 | 14 | 92042045/92041829/92042040/92042333     | 4 | cg06181761/cg12156272/cg16120275/cg16555466 | 0.581622065 | 0.485858207 | 0.421224535 | -0.16039753  | 2.26E-07    | 1.30E-06    |
| TSS1500 | C14orf50  | 14 | 65015998/65016258                       | 2 | cg08152588/cg13540480                       | 0.71695364  | 0.594683217 | 0.494283345 | -0.222670295 | 4.08E-10    | 6.82E-09    |
| TSS1500 | C15orf26  | 15 | 81426360/81426347/81426434              | 3 | cg14380111/cg25029264/cg26546864            | 0.231070845 | 0.277867735 | 0.402607574 | 0.171536729  | 0.000183828 | 0.000511804 |
| TSS1500 | C15orf38  | 15 | 90456541/90456924/90456686/90456619     | 4 | cg01256846/cg06184785/cg07961715/cg26702670 | 0.496708204 | 0.394856324 | 0.312790943 | -0.183917261 | 8.14E-11    | 2.11E-09    |
| TSS1500 | C15orf5   | 15 | 77518882/77519170                       | 2 | cg06817669/cg08130265                       | 0.5018212   | 0.370531797 | 0.288939598 | -0.212881602 | 1.31E-11    | 6.27E-10    |
| TSS1500 | C15orf63  | 15 | 44092166/44092345/44092314/44092398     | 4 | cg02556940/cg08278937/cg13793048/cg26552774 | 0.796005046 | 0.731434783 | 0.614546082 | -0.181458964 | 1.14E-06    | 5.36E-06    |
| TSS1500 | C16orf73  | 16 | 1922425/1922370/1922400/1922577         | 4 | cg01422476/cg03467725/cg08734647/cg27105890 | 0.315759298 | 0.350905211 | 0.511049441 | 0.195290143  | 0.000521927 | 0.001322874 |
| TSS1500 | C16orf78  | 16 | 49407465/49407186                       | 2 | cg03478444/cg07804582                       | 0.779754363 | 0.698456039 | 0.581780732 | -0.197973631 | 4.83E-10    | 7.78E-09    |
| TSS1500 | C16orf89  | 16 | 5117565/5116674                         | 2 | cg02878222/cg27664407                       | 0.54217156  | 0.387457372 | 0.294618095 | -0.247553465 | 4.82E-12    | 3.60E-10    |

|         |           |    |                                                                                                    |                                                                                                                        |             |             |             |              |          |          |
|---------|-----------|----|----------------------------------------------------------------------------------------------------|------------------------------------------------------------------------------------------------------------------------|-------------|-------------|-------------|--------------|----------|----------|
| TSS1500 | C17orf102 | 17 | 32907132/3290763<br>9/32906622/329073<br>88/32907002/32907 9<br>705/32907636/3290<br>6991/32907731 | cg00196787/cg03442<br>425/cg04790084/cg0<br>6459443/cg06557358<br>/cg10451253/cg2174<br>5612/cg23791505/cg<br>27213352 | 0.239433865 | 0.29955866  | 0.451134977 | 0.211701112  | 1.15E-06 | 5.37E-06 |
| TSS1500 | C17orf74  | 17 | 7328585/7328520/7<br>328532                                                                        | cg04374959/cg08568<br>447/cg08903422                                                                                   | 0.757359278 | 0.689864628 | 0.591138732 | -0.166220546 | 3.63E-07 | 1.97E-06 |
| TSS1500 | C17orf77  | 17 | 72580515/7258045<br>8                                                                              | cg06794038/cg21828<br>432                                                                                              | 0.486370203 | 0.383258878 | 0.301296625 | -0.185073578 | 2.71E-09 | 3.08E-08 |
| TSS1500 | C17orf82  | 17 | 59488635/5948844<br>3/59488240/594881 4<br>16                                                      | cg07482936/cg12658<br>720/cg13918518/cg1<br>5885672                                                                    | 0.222752795 | 0.27811998  | 0.3869746   | 0.164221805  | 1.13E-08 | 9.84E-08 |
| TSS1500 | C17orf88  | 17 | 41994096/4199312<br>7/41994119/419941 4<br>81                                                      | cg12496455/cg16631<br>417/cg18464244/cg2<br>4631052                                                                    | 0.727791195 | 0.680008733 | 0.558075757 | -0.169715438 | 4.63E-08 | 3.26E-07 |
| TSS1500 | C18orf34  | 18 | 31020754/3102100<br>3/31020511/310204<br>18/31020806/31021 8<br>065/31020973/3102<br>0627          | cg00625334/cg03478<br>497/cg05245861/cg0<br>5332960/cg05994094<br>/cg18382305/cg2061<br>5848/cg20820063                | 0.295185116 | 0.358932728 | 0.498209496 | 0.203024381  | 1.58E-07 | 9.56E-07 |
| TSS1500 | C19orf41  | 19 | 50667404/5066708<br>6/50667801                                                                     | cg01867155/cg03095<br>288/cg06708133                                                                                   | 0.441437175 | 0.317565419 | 0.254091046 | -0.187346129 | 1.86E-09 | 2.25E-08 |
| TSS1500 | C1orf110  | 1  | 162838907/162838<br>809                                                                            | cg01403607/cg12610<br>079                                                                                              | 0.651612248 | 0.521472908 | 0.41654955  | -0.235062698 | 4.58E-12 | 3.51E-10 |
| TSS1500 | C1orf116  | 1  | 207206447                                                                                          | cg15485859                                                                                                             | 0.586296185 | 0.479907433 | 0.367807273 | -0.218488912 | 1.06E-10 | 2.54E-09 |
| TSS1500 | C1orf14   | 1  | 182923115/182923<br>750/182923215                                                                  | cg00379090/cg05969<br>496/cg26419869                                                                                   | 0.786517318 | 0.748356169 | 0.628802375 | -0.157714943 | 8.06E-09 | 7.38E-08 |
| TSS1500 | C1orf144  | 1  | 16692150/1669307<br>9                                                                              | cg01467503/cg10308<br>193                                                                                              | 0.503347975 | 0.392485006 | 0.3221469   | -0.181201075 | 1.92E-12 | 2.06E-10 |
| TSS1500 | C1orf161  | 1  | 116653399/116653<br>561/116653300/116 4<br>653093                                                  | cg03847796/cg07577<br>997/cg15469709/cg2<br>6678765                                                                    | 0.437585741 | 0.341161032 | 0.272080109 | -0.165505632 | 4.18E-11 | 1.37E-09 |
| TSS1500 | C1orf56   | 1  | 151019134/151019<br>560/151019727/151 4<br>019274                                                  | cg04244851/cg11852<br>073/cg13072446/cg2<br>3822289                                                                    | 0.853799177 | 0.731346567 | 0.640995742 | -0.212803434 | 2.62E-07 | 1.48E-06 |
| TSS1500 | C1orf68   | 1  | 152691125/152691<br>758                                                                            | cg13927088/cg26420<br>391                                                                                              | 0.758410478 | 0.653446333 | 0.523588995 | -0.234821482 | 1.49E-07 | 9.08E-07 |
| TSS1500 | C1QL2     | 2  | 119916686/119917<br>385                                                                            | cg12891160/cg20883<br>684                                                                                              | 0.38175445  | 0.493679667 | 0.623964523 | 0.242210073  | 1.53E-07 | 9.32E-07 |
| TSS1500 | C1QTNF5   | 11 | 119218027/119217<br>884/119218238                                                                  | cg10904867/cg16996<br>281/cg19560971                                                                                   | 0.499881308 | 0.387882361 | 0.274490673 | -0.225390635 | 6.58E-13 | 1.11E-10 |



|         |           |    |                                                      |   |                                                                |             |             |             |              |             |             |
|---------|-----------|----|------------------------------------------------------|---|----------------------------------------------------------------|-------------|-------------|-------------|--------------|-------------|-------------|
| TSS1500 | C1QTNF7   | 4  | 15428768/1537495<br>0/15375866/154287<br>50/15375625 | 5 | cg05003411/cg06742<br>778/cg11290265/cg1<br>4547240/cg22686240 | 0.622566925 | 0.509714476 | 0.38269783  | -0.239869095 | 8.43E-12    | 4.92E-10    |
| TSS1500 | C1QTNF8   | 16 | 1146445/1147214/1<br>146545                          | 3 | cg01006126/cg01767<br>885/cg02726898                           | 0.659105105 | 0.576308583 | 0.497361834 | -0.161743271 | 1.18E-07    | 7.34E-07    |
| TSS1500 | C1QTNF9B  | 13 | 24471857/2447137<br>1/24471776                       | 3 | cg02406148/cg03587<br>877/cg22523074                           | 0.681063265 | 0.604757046 | 0.527251362 | -0.153811903 | 6.23E-08    | 4.20E-07    |
| TSS1500 | C20orf151 | 20 | 61003303/6100286<br>6/61002857                       | 3 | cg00334976/cg03359<br>095/cg17976205                           | 0.451815188 | 0.357156628 | 0.2750867   | -0.176728488 | 2.81E-13    | 7.87E-11    |
| TSS1500 | C20orf160 | 20 | 30597590/3059769<br>4/30597664                       | 3 | cg09685763/cg11801<br>374/cg12084436                           | 0.635684392 | 0.520321391 | 0.442416745 | -0.193267646 | 6.85E-10    | 1.02E-08    |
| TSS1500 | C20orf185 | 20 | 31642282/3164180<br>8/31642120                       | 3 | cg00549758/cg20926<br>651/cg26111757                           | 0.600620057 | 0.494519069 | 0.422745511 | -0.177874546 | 2.91E-13    | 7.87E-11    |
| TSS1500 | C20orf186 | 20 | 31668141/3166844<br>8                                | 2 | cg03442592/cg05890<br>956                                      | 0.749375975 | 0.709791322 | 0.547756936 | -0.201619039 | 0.000103299 | 0.000304159 |
| TSS1500 | C20orf194 | 20 | 3388900/3389329/3<br>389408/3389535/33<br>88711      | 5 | cg02893482/cg07023<br>803/cg13516746/cg2<br>0681068/cg25506879 | 0.160570255 | 0.206632479 | 0.344387    | 0.183816744  | 0.000112862 | 0.000328844 |
| TSS1500 | C20orf195 | 20 | 62183964/6218392<br>4/62183966                       | 3 | cg15332132/cg20482<br>390/cg26221801                           | 0.642285345 | 0.537936661 | 0.466298805 | -0.17598654  | 1.64E-06    | 7.33E-06    |
| TSS1500 | C20orf71  | 20 | 31804277/3180490<br>1/31803710                       | 3 | cg01216882/cg01671<br>881/cg21142447                           | 0.639549023 | 0.518190594 | 0.446516334 | -0.193032688 | 6.69E-09    | 6.34E-08    |
| TSS1500 | C20orf79  | 20 | 18794097/1879381<br>7                                | 2 | cg08567760/cg08716<br>736                                      | 0.69846479  | 0.54324435  | 0.404466973 | -0.293997817 | 1.21E-10    | 2.81E-09    |
| TSS1500 | C20orf85  | 20 | 56724999/5672569<br>5/56725730                       | 3 | cg11800608/cg12813<br>792/cg20003983                           | 0.44296698  | 0.347821169 | 0.282244161 | -0.160722819 | 1.38E-11    | 6.47E-10    |
| TSS1500 | C21orf34  | 21 | 17442467/1744195<br>3/17565263/175663<br>81/17565450 | 5 | cg10068793/cg10273<br>072/cg10341719/cg1<br>0500737/cg22104103 | 0.61304077  | 0.530701658 | 0.456844374 | -0.156196396 | 1.68E-12    | 2.01E-10    |
| TSS1500 | C21orf54  | 21 | 34543051/3454276<br>2/34543584                       | 3 | cg11056129/cg12077<br>772/cg22109464                           | 0.667533267 | 0.575913426 | 0.498208361 | -0.169324906 | 3.42E-10    | 6.02E-09    |
| TSS1500 | C21orf96  | 21 | 36412119/3641245<br>6                                | 2 | cg05644223/cg16071<br>713                                      | 0.336004293 | 0.214465603 | 0.16720432  | -0.168799972 | 1.13E-12    | 1.54E-10    |
| TSS1500 | C2CD4A    | 15 | 62358751/6235853<br>1/62358920/623577<br>10          | 4 | cg00456672/cg04569<br>583/cg19294311/cg2<br>7197276            | 0.59406607  | 0.504011655 | 0.439477812 | -0.154588257 | 3.18E-10    | 5.71E-09    |

|         |          |    |                                                                                                  |   |                                                                                                                        |             |             |             |              |          |             |
|---------|----------|----|--------------------------------------------------------------------------------------------------|---|------------------------------------------------------------------------------------------------------------------------|-------------|-------------|-------------|--------------|----------|-------------|
| TSS1500 | C2orf16  | 2  | 27798900/2779872<br>4/27798745/277980<br>28                                                      | 4 | cg02621154/cg23055<br>682/cg23058548/cg2<br>3761824                                                                    | 0.725657874 | 0.671330299 | 0.566360159 | -0.159297715 | 7.04E-07 | 3.52E-06    |
| TSS1500 | C2orf71  | 2  | 29298362/2929847<br>4/29297717                                                                   | 3 | cg06200607/cg20836<br>546/cg21249563                                                                                   | 0.642815665 | 0.504591417 | 0.402943227 | -0.239872438 | 9.21E-13 | 1.38E-10    |
| TSS1500 | C3AR1    | 12 | 8220002/8219358                                                                                  | 2 | cg25757697/cg27423<br>177                                                                                              | 0.531033555 | 0.405832511 | 0.267374855 | -0.2636587   | 5.15E-09 | 5.17E-08    |
| TSS1500 | C3orf14  | 3  | 62304554/6230477<br>9/62304629/623041<br>65/62304470/62305<br>003/62305147/6230<br>4264/62304515 | 9 | cg01384143/cg01832<br>005/cg02221302/cg0<br>7212940/cg11120913<br>/cg15059608/cg2275<br>1696/cg25119986/cg<br>26896572 | 0.420210023 | 0.465045378 | 0.57286856  | 0.152658537  | 1.23E-05 | 4.46E-05    |
| TSS1500 | C3orf22  | 3  | 126278020/126278<br>943                                                                          | 2 | cg02765820/cg07743<br>179                                                                                              | 0.6681791   | 0.603232244 | 0.460880923 | -0.207298177 | 5.80E-07 | 2.97E-06    |
| TSS1500 | C4BPB    | 1  | 207262190                                                                                        | 1 | cg05659947                                                                                                             | 0.53585102  | 0.417912761 | 0.331053491 | -0.204797529 | 8.63E-11 | 2.20E-09    |
| TSS1500 | C4orf26  | 4  | 76480681/7648105<br>3/76480905                                                                   | 3 | cg00700728/cg03334<br>213/cg05328761                                                                                   | 0.44131937  | 0.372518822 | 0.289840555 | -0.151478815 | 2.00E-08 | 1.59E-07    |
| TSS1500 | C4orf6   | 4  | 5525710/5526510                                                                                  | 2 | cg06887897/cg11561<br>301                                                                                              | 0.390493285 | 0.316697333 | 0.233324291 | -0.157168994 | 1.40E-12 | 1.76E-10    |
| TSS1500 | C5AR1    | 19 | 47812519/4781278<br>0                                                                            | 2 | cg02149446/cg23058<br>911                                                                                              | 0.539882465 | 0.458551483 | 0.360112323 | -0.179770142 | 2.30E-09 | 2.67E-08    |
| TSS1500 | C5orf23  | 5  | 32788128/3278829<br>0/32788467                                                                   | 3 | cg16434306/cg21494<br>953/cg24363955                                                                                   | 0.714513857 | 0.644690035 | 0.558314361 | -0.156199496 | 2.06E-12 | 2.14E-10    |
| TSS1500 | C6orf10  | 6  | 32340354/3234095<br>5/32340208                                                                   | 3 | cg00738945/cg25145<br>195/cg26166145                                                                                   | 0.845783275 | 0.708825333 | 0.630686055 | -0.21509722  | 1.66E-07 | 9.97E-07    |
| TSS1500 | C6orf105 | 6  | 11779817/1177994<br>1/11779911                                                                   | 3 | cg01129238/cg10787<br>197/cg11210880                                                                                   | 0.66519531  | 0.574712089 | 0.512996723 | -0.152198587 | 4.46E-09 | 4.60E-08    |
| TSS1500 | C6orf122 | 6  | 170199193/170200<br>021/170199865                                                                | 3 | cg08542199/cg15855<br>251/cg19450119                                                                                   | 0.527008092 | 0.436290974 | 0.332913965 | -0.194094127 | 3.83E-13 | 8.04E-11    |
| TSS1500 | C6orf155 | 6  | 72131020/7213075<br>5/72130799/721307<br>42/72130689                                             | 5 | cg00201779/cg00920<br>327/cg03318695/cg2<br>4772267/cg25141674                                                         | 0.425418801 | 0.512862305 | 0.606534338 | 0.181115537  | 9.99E-05 | 0.000295242 |
| TSS1500 | C6orf173 | 6  | 126660872/126660<br>984                                                                          | 2 | cg20229609/cg25454<br>804                                                                                              | 0.531178393 | 0.395431    | 0.288893889 | -0.242284504 | 3.73E-13 | 8.04E-11    |
| TSS1500 | C6orf176 | 6  | 166402699/166402<br>638/166402416/166<br>401921/166402081                                        | 5 | cg04387240/cg06545<br>143/cg08886973/cg1<br>2174276/cg21306006                                                         | 0.227643649 | 0.27459121  | 0.385085798 | 0.157442149  | 2.57E-05 | 8.65E-05    |
| TSS1500 | C6orf222 | 6  | 36305071/3630515<br>5                                                                            | 2 | cg04434994/cg18520<br>925                                                                                              | 0.521939075 | 0.389083867 | 0.299144136 | -0.222794939 | 3.57E-11 | 1.23E-09    |

|         |          |    |                                                                                                                                              |    |                                                                                                                                                                            |             |             |             |              |          |          |
|---------|----------|----|----------------------------------------------------------------------------------------------------------------------------------------------|----|----------------------------------------------------------------------------------------------------------------------------------------------------------------------------|-------------|-------------|-------------|--------------|----------|----------|
| TSS1500 | C7orf16  | 7  | 31726494/3172597<br>3/31725748                                                                                                               | 3  | cg01001101/cg04866<br>380/cg23348723                                                                                                                                       | 0.537798305 | 0.386587033 | 0.287442248 | -0.250356057 | 8.22E-15 | 1.56E-11 |
| TSS1500 | C8orf4   | 8  | 40010631/4001044<br>3                                                                                                                        | 2  | cg13125627/cg17939<br>444                                                                                                                                                  | 0.428292015 | 0.355999136 | 0.26853297  | -0.159759045 | 2.45E-09 | 2.82E-08 |
| TSS1500 | C9orf103 | 9  | 86237590/8623662<br>4                                                                                                                        | 2  | cg01266338/cg14219<br>938                                                                                                                                                  | 0.617831345 | 0.507959706 | 0.394851691 | -0.222979654 | 1.45E-08 | 1.21E-07 |
| TSS1500 | C9orf125 | 9  | 104249936                                                                                                                                    | 1  | cg05823563                                                                                                                                                                 | 0.56374433  | 0.45890055  | 0.382643477 | -0.181100853 | 2.97E-09 | 3.30E-08 |
| TSS1500 | CA10     | 17 | 50236572/5023760<br>4/50237205/502377<br>42/50237401/50237<br>403/50236465/5023<br>7576/50236765/502<br>37844/50237267/50<br>236344/50237315 | 13 | cg04881814/cg07111<br>868/cg07398767/cg0<br>7723251/cg08605326<br>/cg13125157/cg1405<br>6110/cg20552747/cg<br>21328033/cg2138582<br>1/cg22855255/cg250<br>39722/cg25592977 | 0.420112838 | 0.486412685 | 0.615639785 | 0.195526947  | 1.96E-09 | 2.34E-08 |
| TSS1500 | CA3      | 8  | 86350568/8635059<br>2/86350381/863503<br>90/86349754/86350<br>581/86350278/8634<br>9742                                                      | 8  | cg05355225/cg07560<br>510/cg12264626/cg1<br>3721134/cg13958215<br>/cg18674980/cg2228<br>9837/cg26461905                                                                    | 0.566545198 | 0.654038028 | 0.724864961 | 0.158319763  | 7.00E-11 | 1.88E-09 |
| TSS1500 | CACNA1A  | 19 | 13617549/1361758<br>4/13617518                                                                                                               | 3  | cg03697708/cg12092<br>090/cg27555529                                                                                                                                       | 0.155759768 | 0.231741004 | 0.366403472 | 0.210643703  | 1.26E-05 | 4.55E-05 |
| TSS1500 | CACNA1I  | 22 | 39966085/3996549<br>5/39965842/399659<br>18                                                                                                  | 4  | cg01726073/cg08800<br>414/cg11138192/cg1<br>8070442                                                                                                                        | 0.71943491  | 0.632944346 | 0.541885641 | -0.177549269 | 1.78E-08 | 1.44E-07 |
| TSS1500 | CACNG3   | 16 | 24265703/2426634<br>7/24265847                                                                                                               | 3  | cg04721098/cg07041<br>488/cg16678467                                                                                                                                       | 0.62929972  | 0.522629275 | 0.450110909 | -0.179188811 | 2.27E-10 | 4.42E-09 |
| TSS1500 | CACNG8   | 19 | 54465583/5446559<br>6                                                                                                                        | 2  | cg15786180/cg17866<br>667                                                                                                                                                  | 0.234210285 | 0.354253314 | 0.479799281 | 0.245588996  | 1.09E-05 | 4.00E-05 |
| TSS1500 | CAMK1G   | 1  | 209755781                                                                                                                                    | 1  | cg04340324                                                                                                                                                                 | 0.758146105 | 0.663461994 | 0.537664268 | -0.220481837 | 2.40E-08 | 1.86E-07 |
| TSS1500 | CAPN8    | 1  | 223854447/223854<br>639/223854704/223<br>853949/223853928                                                                                    | 5  | cg02313130/cg03543<br>985/cg04147929/cg2<br>3251790/cg27235315                                                                                                             | 0.78770584  | 0.695189324 | 0.633208252 | -0.154497588 | 2.60E-08 | 1.99E-07 |
| TSS1500 | CAPN9    | 1  | 230882959/230882<br>481/230882809/230<br>881857/230882603/<br>230882387                                                                      | 6  | cg03980366/cg07918<br>814/cg12410939/cg1<br>7096979/cg25344142<br>/cg27412093                                                                                              | 0.540269695 | 0.426805161 | 0.34511362  | -0.195156075 | 2.09E-10 | 4.17E-09 |
| TSS1500 | CAPZA3   | 12 | 18890579                                                                                                                                     | 1  | cg25573386                                                                                                                                                                 | 0.473186035 | 0.343712533 | 0.266240668 | -0.206945367 | 7.36E-10 | 1.08E-08 |
| TSS1500 | CASP14   | 19 | 15162623/1516251<br>5                                                                                                                        | 2  | cg01999333/cg02021<br>789                                                                                                                                                  | 0.58994144  | 0.492559689 | 0.359393386 | -0.230548054 | 3.17E-09 | 3.46E-08 |

|         |          |    |                                                                         |   |                                                                                         |             |             |             |              |             |             |
|---------|----------|----|-------------------------------------------------------------------------|---|-----------------------------------------------------------------------------------------|-------------|-------------|-------------|--------------|-------------|-------------|
| TSS1500 | CASP5    | 11 | 104894514/104894216                                                     | 2 | cg08199529/cg10825847                                                                   | 0.661694598 | 0.518746817 | 0.463329532 | -0.198365066 | 8.74E-12    | 5.02E-10    |
| TSS1500 | CATSPER1 | 11 | 65794191/65794352                                                       | 2 | cg01311045/cg14894216                                                                   | 0.724807238 | 0.641795083 | 0.537943775 | -0.186863463 | 3.81E-08    | 2.75E-07    |
| TSS1500 | CBLC     | 19 | 45279765/45280184/45279770                                              | 3 | cg03292149/cg14089474/cg21211730                                                        | 0.57645109  | 0.468342774 | 0.393666445 | -0.182784645 | 2.19E-10    | 4.32E-09    |
| TSS1500 | CCDC117  | 22 | 29168272/29168388                                                       | 2 | cg11501374/cg19953843                                                                   | 0.7903126   | 0.701347811 | 0.634316557 | -0.155996043 | 2.94E-10    | 5.37E-09    |
| TSS1500 | CCDC13   | 3  | 42815903/42815945/42814948                                              | 3 | cg09677287/cg20974621/cg27390245                                                        | 0.815688973 | 0.702974219 | 0.63464778  | -0.181041193 | 4.94E-10    | 7.90E-09    |
| TSS1500 | CCDC135  | 16 | 57727230/57728173/57727746                                              | 3 | cg05859533/cg07540386/cg09418336                                                        | 0.543786195 | 0.453630517 | 0.338720486 | -0.205065709 | 3.18E-10    | 5.71E-09    |
| TSS1500 | CCDC140  | 2  | 223162049/223161771/223162128/223161894                                 | 4 | cg00926215/cg02245378/cg08022524/cg08431536                                             | 0.347181433 | 0.430303367 | 0.575507773 | 0.228326339  | 2.85E-09    | 3.19E-08    |
| TSS1500 | CCDC141  | 2  | 179750458/179751100                                                     | 2 | cg12501949/cg26153162                                                                   | 0.505563165 | 0.380428744 | 0.289374618 | -0.216188547 | 9.30E-12    | 5.15E-10    |
| TSS1500 | CCDC19   | 1  | 159870134/159870326/159870915/159870731                                 | 4 | cg00099427/cg03685774/cg12486913/cg19805160                                             | 0.707626048 | 0.571555541 | 0.503196823 | -0.204429226 | 3.91E-10    | 6.63E-09    |
| TSS1500 | CCDC50   | 3  | 191046547/191046380                                                     | 2 | cg19066520/cg25342125                                                                   | 0.60527054  | 0.410693117 | 0.355004173 | -0.250266367 | 2.54E-10    | 4.82E-09    |
| TSS1500 | CCDC52   | 3  | 113235015/113234510                                                     | 2 | cg10517650/cg18753928                                                                   | 0.44128418  | 0.339668642 | 0.260373675 | -0.180910505 | 1.66E-09    | 2.06E-08    |
| TSS1500 | CCDC90B  | 11 | 82997694/82997910/82997796                                              | 3 | cg03000419/cg07748159/cg11933951                                                        | 0.689672077 | 0.595661509 | 0.456476788 | -0.233195289 | 5.76E-07    | 2.95E-06    |
| TSS1500 | CCK      | 3  | 42307866/42306974/42307761/42306737/42307799/42306852/42307193/42307519 | 8 | cg10778780/cg11142705/cg12727529/cg17621718/cg18789547/cg23983435/cg25493589/cg25516803 | 0.426878942 | 0.497143631 | 0.594032686 | 0.167153744  | 5.59E-08    | 3.83E-07    |
| TSS1500 | CCKBR    | 11 | 6280583/6280512/6280183/6280531                                         | 4 | cg05351257/cg13346411/cg26265234/cg26678978                                             | 0.202651899 | 0.228578226 | 0.3679965   | 0.165344601  | 0.000183692 | 0.000511501 |
| TSS1500 | CCL11    | 17 | 32611642/32612007/32611290                                              | 3 | cg03297192/cg08499840/cg16764236                                                        | 0.653360018 | 0.562948611 | 0.466525606 | -0.186834412 | 2.34E-08    | 1.82E-07    |
| TSS1500 | CCL13    | 17 | 32683054/32682770                                                       | 2 | cg02706575/cg05281206                                                                   | 0.632535513 | 0.509425275 | 0.42220227  | -0.210333242 | 3.63E-12    | 3.12E-10    |
| TSS1500 | CCL2     | 17 | 32581220/32581035/32581466/32580869                                     | 4 | cg04633676/cg05440824/cg12698626/cg21109025                                             | 0.549400907 | 0.484713074 | 0.365588338 | -0.183812569 | 3.51E-08    | 2.57E-07    |
| TSS1500 | CCL20    | 2  | 228678005                                                               | 1 | cg09425228                                                                              | 0.696894905 | 0.633821439 | 0.530765059 | -0.166129846 | 8.97E-08    | 5.78E-07    |

|         |          |    |                                                                                                                                                                                                              |    |                                                                                                                                                                                                                                                                                                                                                                                                                                                                       |             |             |             |              |          |          |
|---------|----------|----|--------------------------------------------------------------------------------------------------------------------------------------------------------------------------------------------------------------|----|-----------------------------------------------------------------------------------------------------------------------------------------------------------------------------------------------------------------------------------------------------------------------------------------------------------------------------------------------------------------------------------------------------------------------------------------------------------------------|-------------|-------------|-------------|--------------|----------|----------|
| TSS1500 | CCL8     | 17 | 32645753/3264580<br>6/32645748                                                                                                                                                                               | 3  | cg00038857/cg04656<br>009/cg27000831                                                                                                                                                                                                                                                                                                                                                                                                                                  | 0.60098327  | 0.435627009 | 0.316505959 | -0.284477311 | 1.61E-12 | 1.95E-10 |
| TSS1500 | CCNA1    | 13 | 37005566/3700507<br>4/37004617/370060<br>63/37004721/37005<br>570/37005299/3700<br>6127/37005115/370<br>04812/37005557/37<br>004857/37005582/3<br>7004715/37005501/<br>37005489/3700510<br>7/37004737/370046 | 34 | cg00282249/cg00370<br>179/cg01040523/cg0<br>2478448/cg03871460<br>/cg05089090/cg0512<br>0331/cg05137358/cg<br>06260815/cg0796212<br>8/cg08215918/cg082<br>96176/cg08676975/c<br>g11023392/cg115136<br>37/cg12417071/cg13<br>435392/cg13711394/<br>cg14089714/cg14499<br>563/cg17215831/cg1<br>8348647/cg18948722<br>/cg19866195/cg2158<br>7066/cg21754388/cg<br>23831735/cg2415405<br>3/cg24233119/cg242<br>97049/cg24334591/c<br>g26345046/cg269843<br>43/cg27142924 | 0.336303202 | 0.466972428 | 0.62634131  | 0.290038107  | 1.06E-12 | 1.52E-10 |
| TSS1500 | CCR2     | 3  | 46394845/4639455<br>0                                                                                                                                                                                        | 2  | cg06280059/cg07743<br>747                                                                                                                                                                                                                                                                                                                                                                                                                                             | 0.679691808 | 0.586713686 | 0.483398848 | -0.19629296  | 2.35E-09 | 2.71E-08 |
| TSS1500 | CD109    | 6  | 74404526/7440487<br>9/74405048                                                                                                                                                                               | 3  | cg00439709/cg23004<br>174/cg25850808                                                                                                                                                                                                                                                                                                                                                                                                                                  | 0.719892365 | 0.643471176 | 0.552540255 | -0.16735211  | 6.58E-10 | 9.83E-09 |
| TSS1500 | CD1B     | 1  | 158302740                                                                                                                                                                                                    | 1  | cg12546793                                                                                                                                                                                                                                                                                                                                                                                                                                                            | 0.35356663  | 0.227465033 | 0.163482    | -0.19008463  | 1.88E-12 | 2.06E-10 |
| TSS1500 | CD1C     | 1  | 158258366/158259<br>268/158258802                                                                                                                                                                            | 3  | cg00173005/cg16993<br>682/cg27534912                                                                                                                                                                                                                                                                                                                                                                                                                                  | 0.49024639  | 0.357822686 | 0.248668193 | -0.241578197 | 1.02E-13 | 4.59E-11 |
| TSS1500 | CD2      | 1  | 117296494/117296<br>242/117295987                                                                                                                                                                            | 3  | cg10489672/cg16719<br>404/cg21861305                                                                                                                                                                                                                                                                                                                                                                                                                                  | 0.641218083 | 0.510287603 | 0.416474898 | -0.224743185 | 2.21E-08 | 1.73E-07 |
| TSS1500 | CD200R1L | 3  | 112565651                                                                                                                                                                                                    | 1  | cg18069403                                                                                                                                                                                                                                                                                                                                                                                                                                                            | 0.846820095 | 0.749162411 | 0.652910945 | -0.19390915  | 9.43E-06 | 3.49E-05 |
| TSS1500 | CD207    | 2  | 71063282/7106408<br>6                                                                                                                                                                                        | 2  | cg08989942/cg26946<br>836                                                                                                                                                                                                                                                                                                                                                                                                                                             | 0.623148475 | 0.464274689 | 0.335575727 | -0.287572748 | 9.23E-13 | 1.38E-10 |
| TSS1500 | CD3E     | 11 | 118174435/118174<br>085                                                                                                                                                                                      | 2  | cg18085869/cg23369<br>555                                                                                                                                                                                                                                                                                                                                                                                                                                             | 0.740834723 | 0.641928164 | 0.568956405 | -0.171878318 | 5.86E-10 | 8.99E-09 |

|         |        |    |                                                                                                                                                                                                                                    |                                                                                                                                                                                                                                                                                                                  |             |             |             |              |          |          |
|---------|--------|----|------------------------------------------------------------------------------------------------------------------------------------------------------------------------------------------------------------------------------------|------------------------------------------------------------------------------------------------------------------------------------------------------------------------------------------------------------------------------------------------------------------------------------------------------------------|-------------|-------------|-------------|--------------|----------|----------|
| TSS1500 | CD40   | 20 | 44745522/4474639<br>2/44746681/447466 5<br>55/44746499                                                                                                                                                                             | cg01149415/cg09053<br>081/cg17929951/cg1<br>9785066/cg19839655                                                                                                                                                                                                                                                   | 0.299401668 | 0.394133619 | 0.502577614 | 0.203175946  | 1.03E-07 | 6.50E-07 |
| TSS1500 | CD53   | 1  | 111412880/111414<br>364/111414984/111 4<br>415232                                                                                                                                                                                  | cg06351337/cg07314<br>983/cg10105218/cg1<br>0516886                                                                                                                                                                                                                                                              | 0.574974268 | 0.498074156 | 0.392852312 | -0.182121956 | 3.56E-08 | 2.59E-07 |
| TSS1500 | CD5L   | 1  | 157811905                                                                                                                                                                                                                          | cg23992209                                                                                                                                                                                                                                                                                                       | 0.767331115 | 0.641830617 | 0.540177964 | -0.227153151 | 7.97E-08 | 5.21E-07 |
| TSS1500 | CD81   | 11 | 2397523/2397811/2<br>397655/2397784/23<br>97685/2398336/239<br>7562/2397323/2397<br>831/2398327/23976<br>14/2397977/239806 23<br>1/2397773/2398138<br>/2397350/2397538/<br>2397255/2397303/2<br>397201/2397576/23<br>97597/2397486 | cg00319334/cg01492<br>909/cg02078292/cg0<br>2249841/cg03848831<br>/cg04069951/cg0500<br>2336/cg05102670/cg<br>05490366/cg0669951<br>9/cg07111719/cg078<br>04260/cg11705746/c<br>g12845432/cg138941<br>92/cg14022995/cg14<br>398963/cg15289899/<br>cg18409302/cg21843<br>586/cg26053358/cg2<br>6819160/cg27055782 | 0.544657376 | 0.427742872 | 0.37531124  | -0.169346137 | 3.16E-10 | 5.68E-09 |
| TSS1500 | CD86   | 3  | 121795768/121795<br>811/121796071/121 4<br>773564                                                                                                                                                                                  | cg00697440/cg06327<br>732/cg09644952/cg1<br>1874272                                                                                                                                                                                                                                                              | 0.48298169  | 0.412095972 | 0.332672009 | -0.150309681 | 2.15E-09 | 2.54E-08 |
| TSS1500 | CDC14C | 7  | 48963443/4896340<br>8                                                                                                                                                                                                              | cg04527202/cg05563<br>813                                                                                                                                                                                                                                                                                        | 0.757763745 | 0.668332011 | 0.521815986 | -0.235947759 | 1.69E-09 | 2.09E-08 |
| TSS1500 | CDH10  | 5  | 24645487/2464514<br>7                                                                                                                                                                                                              | cg01058368/cg14730<br>815                                                                                                                                                                                                                                                                                        | 0.408848933 | 0.414785036 | 0.56782963  | 0.158980697  | 5.65E-06 | 2.21E-05 |
| TSS1500 | CDH12  | 5  | 22854704                                                                                                                                                                                                                           | cg15175266                                                                                                                                                                                                                                                                                                       | 0.489993885 | 0.386479383 | 0.290492182 | -0.199501703 | 3.94E-12 | 3.27E-10 |
| TSS1500 | CDH19  | 18 | 64271503/6427146<br>9                                                                                                                                                                                                              | cg13853450/cg15728<br>909                                                                                                                                                                                                                                                                                        | 0.747354578 | 0.626766872 | 0.47666073  | -0.270693848 | 2.77E-12 | 2.69E-10 |
| TSS1500 | CDH2   | 18 | 25758159/2575843<br>0/25757710                                                                                                                                                                                                     | cg02840109/cg12169<br>536/cg14312538                                                                                                                                                                                                                                                                             | 0.172736437 | 0.206551427 | 0.351630767 | 0.17889433   | 2.78E-05 | 9.29E-05 |
| TSS1500 | CDH20  | 18 | 59156627                                                                                                                                                                                                                           | cg03319695                                                                                                                                                                                                                                                                                                       | 0.60413641  | 0.458245078 | 0.354302695 | -0.249833715 | 8.07E-12 | 4.90E-10 |
| TSS1500 | CDH4   | 20 | 59827195/5982620<br>7/59827212                                                                                                                                                                                                     | cg08290240/cg15534<br>366/cg18092028                                                                                                                                                                                                                                                                             | 0.377546091 | 0.437289296 | 0.529764126 | 0.152218035  | 6.80E-08 | 4.53E-07 |
| TSS1500 | CDH8   | 16 | 62070306/6207036<br>5/62071193/620702 4<br>46                                                                                                                                                                                      | cg01007828/cg04882<br>273/cg05946623/cg1<br>3397057                                                                                                                                                                                                                                                              | 0.449240438 | 0.520351579 | 0.620601956 | 0.171361518  | 3.02E-09 | 3.34E-08 |

|         |          |    |                                                                                                                                       |    |                                                                                                                                                  |             |             |             |              |          |          |
|---------|----------|----|---------------------------------------------------------------------------------------------------------------------------------------|----|--------------------------------------------------------------------------------------------------------------------------------------------------|-------------|-------------|-------------|--------------|----------|----------|
| TSS1500 | CDK3     | 17 | 73996245/7399633<br>1/73996423/739966<br>56                                                                                           | 4  | cg07471052/cg14040<br>633/cg14666354/cg2<br>5711239                                                                                              | 0.701718    | 0.556560665 | 0.481635856 | -0.220082144 | 4.14E-09 | 4.32E-08 |
| TSS1500 | CDO1     | 5  | 115152938/115152<br>785/115152835/115<br>153223                                                                                       | 4  | cg04676799/cg07644<br>368/cg16198692/cg2<br>3029474                                                                                              | 0.57185475  | 0.693840264 | 0.779868445 | 0.208013695  | 1.64E-10 | 3.46E-09 |
| TSS1500 | CDX1     | 5  | 149545907/149545<br>928/149546087/149<br>546073                                                                                       | 4  | cg11524248/cg24216<br>701/cg25132276/cg2<br>6531174                                                                                              | 0.618906085 | 0.521917951 | 0.448638338 | -0.170267748 | 8.82E-11 | 2.23E-09 |
| TSS1500 | CEACAM20 | 19 | 45033943/4503457<br>9/45034961                                                                                                        | 3  | cg02904918/cg12497<br>816/cg17384457                                                                                                             | 0.559394025 | 0.473612331 | 0.398190425 | -0.1612036   | 3.74E-10 | 6.45E-09 |
| TSS1500 | CEACAM21 | 19 | 42081255/4208210<br>2/42082267                                                                                                        | 3  | cg00921682/cg03745<br>234/cg25528786                                                                                                             | 0.74048221  | 0.660517317 | 0.513324277 | -0.227157933 | 2.20E-09 | 2.58E-08 |
| TSS1500 | CEACAM4  | 19 | 42134620/4213412<br>8/42134478                                                                                                        | 3  | cg05891548/cg21049<br>958/cg21529807                                                                                                             | 0.48040921  | 0.39834397  | 0.302570761 | -0.177838449 | 1.39E-11 | 6.48E-10 |
| TSS1500 | CER1     | 9  | 14723496                                                                                                                              | 1  | cg01446692                                                                                                                                       | 0.585765655 | 0.524203822 | 0.388279041 | -0.197486614 | 8.04E-07 | 3.96E-06 |
| TSS1500 | CFHR1    | 1  | 196787850                                                                                                                             | 1  | cg12687463                                                                                                                                       | 0.571536845 | 0.438112133 | 0.306298164 | -0.265238681 | 6.66E-13 | 1.12E-10 |
| TSS1500 | CFHR2    | 1  | 196911888                                                                                                                             | 1  | cg09551916                                                                                                                                       | 0.581978375 | 0.451573889 | 0.314094859 | -0.267883516 | 1.26E-12 | 1.65E-10 |
| TSS1500 | CFHR3    | 1  | 196743672                                                                                                                             | 1  | cg04614339                                                                                                                                       | 0.4525588   | 0.324182756 | 0.228356532 | -0.224202268 | 2.05E-14 | 2.04E-11 |
| TSS1500 | CFHR4    | 1  | 196855851                                                                                                                             | 1  | cg11793499                                                                                                                                       | 0.78677561  | 0.6862508   | 0.510848623 | -0.275926987 | 1.50E-09 | 1.90E-08 |
| TSS1500 | CFHR5    | 1  | 196946228/196945<br>845/196945530                                                                                                     | 3  | cg06952534/cg21475<br>781/cg25840094                                                                                                             | 0.637010632 | 0.54514455  | 0.470782853 | -0.166227779 | 2.49E-13 | 7.39E-11 |
| TSS1500 | CGA      | 6  | 87805033                                                                                                                              | 1  | cg18899818                                                                                                                                       | 0.68895494  | 0.581215422 | 0.465283977 | -0.223670963 | 4.21E-11 | 1.37E-09 |
| TSS1500 | CGB8     | 19 | 49552606/4955374<br>3/49553761/495537<br>88                                                                                           | 4  | cg04115602/cg16242<br>238/cg19446264/cg2<br>7040708                                                                                              | 0.591928043 | 0.499030172 | 0.42240017  | -0.169527872 | 1.73E-13 | 6.30E-11 |
| TSS1500 | CHL1     | 3  | 238161/238392/238<br>318/238048                                                                                                       | 4  | cg00903242/cg01295<br>518/cg04001014/cg1<br>1165881                                                                                              | 0.319082383 | 0.331529224 | 0.563607323 | 0.244524939  | 1.10E-07 | 6.93E-07 |
| TSS1500 | CHMP4C   | 8  | 82644012/8264368<br>0/82644373                                                                                                        | 3  | cg07583137/cg11253<br>416/cg18584012                                                                                                             | 0.468662588 | 0.366355902 | 0.28652611  | -0.182136478 | 1.22E-10 | 2.81E-09 |
| TSS1500 | CHRM2    | 7  | 136553595/136553<br>110/136553243/136<br>553327/136553289/<br>136553170/136553<br>778/136553263/136<br>553682/136553088/<br>136553728 | 11 | cg00973677/cg02866<br>106/cg04748704/cg0<br>5680531/cg09546907<br>/cg10418044/cg1045<br>4514/cg17405012/cg<br>22471517/cg2515044<br>0/cg25632105 | 0.313523998 | 0.387184012 | 0.502714533 | 0.189190535  | 1.92E-10 | 3.91E-09 |

|         |         |    |                                                                                                                                     |    |                                                                                                                                                                 |             |             |             |              |          |             |
|---------|---------|----|-------------------------------------------------------------------------------------------------------------------------------------|----|-----------------------------------------------------------------------------------------------------------------------------------------------------------------|-------------|-------------|-------------|--------------|----------|-------------|
| TSS1500 | CHRNA3  | 15 | 78914439/7891426<br>4/78914284/789140<br>83                                                                                         | 4  | cg16570223/cg19993<br>258/cg22670733/cg2<br>5527599                                                                                                             | 0.62403284  | 0.493439392 | 0.421273093 | -0.202759747 | 5.07E-15 | 1.31E-11    |
| TSS1500 | CHRNA9  | 4  | 40337262/4033673<br>5/40336255                                                                                                      | 3  | cg09632936/cg25190<br>534/cg26531231                                                                                                                            | 0.77104868  | 0.666162622 | 0.572421873 | -0.198626807 | 7.58E-07 | 3.75E-06    |
| TSS1500 | CHST10  | 2  | 101034825/101035<br>456                                                                                                             | 2  | cg05352754/cg07618<br>258                                                                                                                                       | 0.658533    | 0.579670811 | 0.486172264 | -0.172360736 | 6.33E-11 | 1.75E-09    |
| TSS1500 | CHST15  | 10 | 125806958/125807<br>504/125807047                                                                                                   | 3  | cg06034255/cg09595<br>290/cg16449489                                                                                                                            | 0.719218533 | 0.531967692 | 0.380170368 | -0.339048164 | 1.72E-12 | 2.01E-10    |
| TSS1500 | CHST2   | 3  | 142838082/142838<br>320/142837252/142<br>837472/142837529/<br>142837995/142838<br>003/142837564                                     | 8  | cg07399369/cg10886<br>442/cg11108893/cg1<br>7024542/cg19027710<br>/cg19442495/cg1978<br>8429/cg21597025                                                         | 0.333656144 | 0.374005157 | 0.485523315 | 0.151867171  | 4.74E-05 | 0.000150367 |
| TSS1500 | CHST5   | 16 | 75569527/7556985<br>2/75569459                                                                                                      | 3  | cg03517083/cg03858<br>460/cg27232078                                                                                                                            | 0.60959881  | 0.589231594 | 0.396092173 | -0.213506637 | 5.09E-08 | 3.54E-07    |
| TSS1500 | CIDEA   | 18 | 12254175/1225414<br>8/12254173/122538<br>28/12254365/12254<br>153/12253749/1225<br>4024/12254377/122<br>54241/12253859/12<br>254120 | 12 | cg00851770/cg03245<br>632/cg12072560/cg1<br>4976646/cg15063116<br>/cg18309817/cg1864<br>9459/cg19883905/cg<br>20950011/cg2137677<br>4/cg23754772/cg269<br>74111 | 0.277911892 | 0.386769329 | 0.464986954 | 0.187075063  | 6.46E-06 | 2.49E-05    |
| TSS1500 | CLDN17  | 21 | 31540204                                                                                                                            | 1  | cg02825728                                                                                                                                                      | 0.64226953  | 0.49235175  | 0.395951982 | -0.246317548 | 5.76E-07 | 2.95E-06    |
| TSS1500 | CLDN4   | 7  | 73244836/7324407<br>3/73243736                                                                                                      | 3  | cg10393875/cg14826<br>417/cg22123387                                                                                                                            | 0.464066585 | 0.364696317 | 0.276493168 | -0.187573417 | 2.95E-12 | 2.76E-10    |
| TSS1500 | CLEC10A | 17 | 6983991/6984187/6<br>984106                                                                                                         | 3  | cg01472101/cg04100<br>395/cg21550483                                                                                                                            | 0.504791538 | 0.433333797 | 0.352197964 | -0.152593574 | 7.78E-09 | 7.18E-08    |
| TSS1500 | CLEC12B | 12 | 10162301/1016175<br>7                                                                                                               | 2  | cg00966659/cg26683<br>917                                                                                                                                       | 0.715093493 | 0.635125956 | 0.541793627 | -0.173299865 | 3.67E-10 | 6.36E-09    |
| TSS1500 | CLEC14A | 14 | 38727014/3872618<br>9                                                                                                               | 2  | cg05172197/cg22902<br>799                                                                                                                                       | 0.667107875 | 0.551166833 | 0.402543582 | -0.264564293 | 5.50E-09 | 5.42E-08    |
| TSS1500 | CLEC17A | 19 | 14693303/1469275<br>9/14692863                                                                                                      | 3  | cg15760345/cg25770<br>495/cg25945273                                                                                                                            | 0.788051465 | 0.714066522 | 0.636253455 | -0.15179801  | 2.88E-05 | 9.58E-05    |
| TSS1500 | CLEC4E  | 12 | 8694468/8694216                                                                                                                     | 2  | cg14909213/cg27078<br>893                                                                                                                                       | 0.675624578 | 0.594896872 | 0.519235289 | -0.156389289 | 2.37E-11 | 9.12E-10    |
| TSS1500 | CLEC4G  | 19 | 7798327/7797355                                                                                                                     | 2  | cg05626117/cg21278<br>129                                                                                                                                       | 0.545917773 | 0.435330403 | 0.357508673 | -0.1884091   | 6.03E-12 | 4.11E-10    |



|         |         |    |                                                             |                                                                |             |             |             |              |             |            |
|---------|---------|----|-------------------------------------------------------------|----------------------------------------------------------------|-------------|-------------|-------------|--------------|-------------|------------|
| TSS1500 | CLIP4   | 2  | 29337946/2933807<br>7/29337984/293379 5<br>88/29338100      | cg01777397/cg06333<br>058/cg07285673/cg0<br>9695033/cg25737323 | 0.288922638 | 0.419389181 | 0.595234157 | 0.306311519  | 6.11E-09    | 5.89E-08   |
| TSS1500 | CLRN1   | 3  | 150691510/150663<br>357/150691910/150 5<br>662697/150692080 | cg08153098/cg10625<br>737/cg24365013/cg2<br>4721964/cg27322397 | 0.583617346 | 0.474174775 | 0.368864147 | -0.2147532   | 2.93E-11    | 1.08E-09   |
| TSS1500 | CLSTN2  | 3  | 139653573/139653<br>431/139653545/139 4<br>653328           | cg00134776/cg00355<br>389/cg01755562/cg1<br>4498423            | 0.200825739 | 0.258721785 | 0.375305538 | 0.1744798    | 0.000100369 | 0.00029659 |
| TSS1500 | CLVS1   | 8  | 62199082                                                    | cg03263337                                                     | 0.37187586  | 0.26334065  | 0.202037267 | -0.169838593 | 5.49E-09    | 5.41E-08   |
| TSS1500 | CLVS2   | 6  | 123317124/123317<br>184/123317212                           | cg01141812/cg01707<br>818/cg21727532                           | 0.28038844  | 0.377501308 | 0.470305495 | 0.189917055  | 4.80E-07    | 2.52E-06   |
| TSS1500 | CMA1    | 14 | 24978681/2497777<br>3                                       | cg01201932/cg08020<br>808                                      | 0.575881078 | 0.480491342 | 0.4033054   | -0.172575678 | 3.52E-08    | 2.57E-07   |
| TSS1500 | CMTM2   | 16 | 66613053/6661309<br>6/66612955                              | cg01683883/cg08032<br>924/cg09849405                           | 0.270345705 | 0.400159912 | 0.603544868 | 0.333199163  | 7.17E-09    | 6.69E-08   |
| TSS1500 | CMTM3   | 16 | 66638320/6663792<br>7/66637919/666382 5<br>93/66638210      | cg00355909/cg01434<br>608/cg16335762/cg2<br>3297477/cg26658728 | 0.173318059 | 0.470402982 | 0.643669665 | 0.470351607  | 2.29E-11    | 8.89E-10   |
| TSS1500 | CMTM8   | 3  | 32279261/3227994<br>8/32279722/322792 4<br>36               | cg01617750/cg02059<br>034/cg08196359/cg2<br>0932822            | 0.544981118 | 0.4805895   | 0.386958943 | -0.158022174 | 7.23E-10    | 1.07E-08   |
| TSS1500 | CNGB1   | 16 | 58005416/5800612<br>4                                       | cg02259550/cg10624<br>445                                      | 0.603636575 | 0.547212242 | 0.447105105 | -0.15653147  | 1.05E-07    | 6.63E-07   |
| TSS1500 | CNRIP1  | 2  | 68548060/6854765<br>5                                       | cg08174244/cg21216<br>118                                      | 0.70666885  | 0.545216989 | 0.394946445 | -0.311722405 | 9.27E-14    | 4.52E-11   |
| TSS1500 | CNTD1   | 17 | 40950290/4094995<br>4/40950545/409498 4<br>11               | cg21689613/cg22239<br>334/cg23510443/cg2<br>4994625            | 0.446075058 | 0.351667614 | 0.278483134 | -0.167591923 | 1.07E-11    | 5.52E-10   |
| TSS1500 | CNTNAP2 | 7  | 145812871/145813<br>031/145813008/145 5<br>813066/145812842 | cg02024077/cg04706<br>867/cg09571420/cg1<br>1642382/cg21322436 | 0.279447773 | 0.342891793 | 0.485223239 | 0.205775466  | 1.66E-05    | 5.85E-05   |
| TSS1500 | CNTNAP5 | 2  | 124782261/124782<br>253/124782117/124 5<br>782263/124782586 | cg03696599/cg08523<br>865/cg11712936/cg1<br>3358636/cg18582824 | 0.441849881 | 0.527821953 | 0.639774452 | 0.197924571  | 1.16E-10    | 2.73E-09   |
| TSS1500 | COG5    | 7  | 107205932/107205<br>253/107205392                           | cg14157213/cg15381<br>326/cg25298235                           | 0.72002247  | 0.64611428  | 0.556304991 | -0.163717479 | 9.38E-09    | 8.40E-08   |

|         |         |    |                                                                            |   |                                                                                              |             |             |             |              |             |             |
|---------|---------|----|----------------------------------------------------------------------------|---|----------------------------------------------------------------------------------------------|-------------|-------------|-------------|--------------|-------------|-------------|
| TSS1500 | COL24A1 | 1  | 86623101/8662239<br>5/86622552/866227<br>37/86622628/86622<br>624/86622682 | 7 | cg07198150/cg09264<br>282/cg13683218/cg2<br>1841239/cg21913319<br>/cg24395801/cg2470<br>0222 | 0.276217379 | 0.309183967 | 0.439967317 | 0.163749938  | 0.000100751 | 0.000297301 |
| TSS1500 | COL28A1 | 7  | 7576090/7576351/7<br>576792/7576116                                        | 4 | cg07301377/cg19972<br>068/cg21105443/cg2<br>2183456                                          | 0.76433848  | 0.629302379 | 0.597574568 | -0.166763912 | 4.93E-09    | 4.98E-08    |
| TSS1500 | COL29A1 | 3  | 130063469/130063<br>505                                                    | 2 | cg08536961/cg10592<br>710                                                                    | 0.744895998 | 0.672279361 | 0.550071159 | -0.194824838 | 1.04E-05    | 3.82E-05    |
| TSS1500 | COL4A1  | 13 | 110960198/110960<br>942/110960186/110<br>960177/110960563/<br>110960452    | 6 | cg15871127/cg19252<br>199/cg22757824/cg2<br>4089600/cg25530246<br>/cg27546237                | 0.269108451 | 0.348211675 | 0.491518032 | 0.222409581  | 1.39E-05    | 4.98E-05    |
| TSS1500 | COL4A2  | 13 | 110959356/110959<br>428/110959104/110<br>958418/110958977/<br>110958892    | 6 | cg02717061/cg06659<br>727/cg13596497/cg1<br>5262516/cg21938148<br>/cg26875813                | 0.287237584 | 0.378680973 | 0.477036666 | 0.189799083  | 9.59E-09    | 8.56E-08    |
| TSS1500 | COL6A6  | 3  | 130278864/130278<br>187                                                    | 2 | cg14720996/cg15922<br>045                                                                    | 0.783829105 | 0.704683022 | 0.598767891 | -0.185061214 | 6.12E-07    | 3.11E-06    |
| TSS1500 | COMP    | 19 | 18902727/1890252<br>7/18902709                                             | 3 | cg03767475/cg08177<br>015/cg22865824                                                         | 0.64956997  | 0.587861454 | 0.496676359 | -0.152893611 | 2.95E-07    | 1.64E-06    |
| TSS1500 | COPS5   | 8  | 67975874/6797588<br>0/67975895                                             | 3 | cg07896832/cg21320<br>567/cg27247252                                                         | 0.76009956  | 0.698727192 | 0.579640145 | -0.180459415 | 9.69E-05    | 0.000287588 |
| TSS1500 | COQ3    | 6  | 99842368/9984235<br>1/99842353                                             | 3 | cg03514381/cg18751<br>133/cg24831427                                                         | 0.59824407  | 0.442925756 | 0.349923117 | -0.248320953 | 1.03E-10    | 2.49E-09    |
| TSS1500 | CORIN   | 4  | 47841314/4784068<br>3                                                      | 2 | cg02955940/cg11819<br>342                                                                    | 0.76536497  | 0.643094467 | 0.611025223 | -0.154339747 | 1.59E-07    | 9.62E-07    |
| TSS1500 | COX8C   | 14 | 93812936/9381205<br>1                                                      | 2 | cg01726287/cg20938<br>103                                                                    | 0.722699625 | 0.592516594 | 0.458205541 | -0.264494084 | 6.58E-10    | 9.83E-09    |
| TSS1500 | CP110   | 16 | 19533815/1953485<br>2                                                      | 2 | cg06784594/cg27259<br>633                                                                    | 0.70235553  | 0.550445267 | 0.462975068 | -0.239380462 | 1.39E-12    | 1.75E-10    |
| TSS1500 | CPA3    | 3  | 148581801/148581<br>837                                                    | 2 | cg03020424/cg13424<br>229                                                                    | 0.47613118  | 0.348653883 | 0.288507327 | -0.187623853 | 3.32E-11    | 1.17E-09    |
| TSS1500 | CPSF4L  | 17 | 71258936/7125858<br>9/71259036                                             | 3 | cg03101058/cg08813<br>944/cg18911972                                                         | 0.52308278  | 0.415520411 | 0.338294309 | -0.184788471 | 1.35E-10    | 3.01E-09    |
| TSS1500 | CPZ     | 4  | 8593933/8593507/8<br>593019/8593665                                        | 4 | cg00535027/cg01105<br>427/cg23283187/cg2<br>5706990                                          | 0.543058995 | 0.440476397 | 0.373526889 | -0.169532106 | 3.25E-12    | 2.88E-10    |
| TSS1500 | CR2     | 1  | 207627372/207626<br>214/207626386/207<br>626535/207626345                  | 5 | cg05508558/cg07573<br>078/cg10109747/cg1<br>4848620/cg23605027                               | 0.696928943 | 0.613159381 | 0.531911851 | -0.165017092 | 9.52E-09    | 8.51E-08    |
| TSS1500 | CRB1    | 1  | 197237119                                                                  | 1 | cg13940125                                                                                   | 0.59197059  | 0.525189533 | 0.402177927 | -0.189792663 | 1.17E-07    | 7.29E-07    |

|         |        |    |                                                                                         |   |                                                                                              |             |             |             |              |             |             |
|---------|--------|----|-----------------------------------------------------------------------------------------|---|----------------------------------------------------------------------------------------------|-------------|-------------|-------------|--------------|-------------|-------------|
| TSS1500 | CRHBP  | 5  | 76247647/7624813<br>1/76247679                                                          | 3 | cg06495038/cg25913<br>647/cg26196496                                                         | 0.70588392  | 0.5585126   | 0.435769332 | -0.270114588 | 2.31E-09    | 2.68E-08    |
| TSS1500 | CRHR2  | 7  | 30722433/3072235<br>9/30722361/307226<br>43                                             | 4 | cg02712145/cg13094<br>036/cg14896516/cg1<br>5615793                                          | 0.286974268 | 0.375717207 | 0.492358127 | 0.205383859  | 2.55E-06    | 1.09E-05    |
| TSS1500 | CRIP1  | 14 | 105952171                                                                               | 1 | cg06618474                                                                                   | 0.5062954   | 0.39968705  | 0.337020305 | -0.169275095 | 1.76E-11    | 7.71E-10    |
| TSS1500 | CRYAB  | 11 | 111783348/111783<br>327/111783355/111<br>783267/111783563/ 7<br>111783499/111783<br>352 | 7 | cg00514609/cg01158<br>277/cg07476508/cg1<br>0048349/cg11694519<br>/cg12947833/cg1520<br>4861 | 0.421133843 | 0.524254352 | 0.588867958 | 0.167734115  | 4.31E-09    | 4.46E-08    |
| TSS1500 | CRYGA  | 2  | 209029782/209029<br>594/209029690                                                       | 3 | cg00139726/cg07313<br>720/cg22386774                                                         | 0.711410438 | 0.623585652 | 0.522424265 | -0.188986173 | 1.71E-09    | 2.11E-08    |
| TSS1500 | CRYGD  | 2  | 208990238/208989<br>579/208989831                                                       | 3 | cg09453636/cg10823<br>322/cg11463113                                                         | 0.479153925 | 0.405568461 | 0.324140325 | -0.1550136   | 1.20E-08    | 1.04E-07    |
| TSS1500 | CSPP1  | 8  | 67975874/6797588<br>0/67975895                                                          | 3 | cg07896832/cg21320<br>567/cg27247252                                                         | 0.76009956  | 0.698727192 | 0.579640145 | -0.180459415 | 9.69E-05    | 0.000287588 |
| TSS1500 | CST1   | 20 | 23732873/2373259<br>5                                                                   | 2 | cg20206322/cg22981<br>961                                                                    | 0.819557913 | 0.742785286 | 0.634607711 | -0.184950201 | 9.27E-08    | 5.95E-07    |
| TSS1500 | CST2   | 20 | 23807778/2380773<br>6                                                                   | 2 | cg21777364/cg25128<br>583                                                                    | 0.500473875 | 0.398866633 | 0.305339382 | -0.195134493 | 5.17E-11    | 1.57E-09    |
| TSS1500 | CST4   | 20 | 23671108/2367004<br>7/23670089                                                          | 3 | cg07707641/cg22238<br>692/cg25965576                                                         | 0.500733733 | 0.407772856 | 0.335448518 | -0.165285215 | 1.86E-10    | 3.83E-09    |
| TSS1500 | CST6   | 11 | 65778967/6577919<br>2/65778210                                                          | 3 | cg02349785/cg15887<br>846/cg19088912                                                         | 0.566982552 | 0.47659958  | 0.402249852 | -0.1647327   | 5.96E-09    | 5.79E-08    |
| TSS1500 | CST7   | 20 | 24929607                                                                                | 1 | cg26450106                                                                                   | 0.48901728  | 0.357791744 | 0.230002528 | -0.259014752 | 3.93E-09    | 4.16E-08    |
| TSS1500 | CST8   | 20 | 23470461/2347027<br>4                                                                   | 2 | cg11835442/cg11879<br>776                                                                    | 0.626130803 | 0.492917139 | 0.395945152 | -0.23018565  | 5.65E-11    | 1.65E-09    |
| TSS1500 | CST9L  | 20 | 23550668/2355044<br>6/23550632                                                          | 3 | cg01921212/cg02592<br>239/cg11897887                                                         | 0.692758855 | 0.636572872 | 0.54237625  | -0.150382605 | 0.000184447 | 0.000513228 |
| TSS1500 | CTLA4  | 2  | 204731519/204731<br>068/204731649                                                       | 3 | cg05092371/cg22572<br>158/cg24077172                                                         | 0.83561332  | 0.806892456 | 0.673246232 | -0.162367088 | 0.000192291 | 0.000532555 |
| TSS1500 | CTNNA3 | 10 | 69456307/6945666<br>7/69425930/694267<br>478                                            | 4 | cg00132141/cg04141<br>648/cg12768447/cg2<br>6297493                                          | 0.688468404 | 0.610107619 | 0.521445739 | -0.167022665 | 1.09E-11    | 5.55E-10    |
| TSS1500 | CUBN   | 10 | 17172679/1717264<br>6                                                                   | 2 | cg06098474/cg26276<br>014                                                                    | 0.744350178 | 0.684790819 | 0.553881191 | -0.190468987 | 4.33E-06    | 1.74E-05    |
| TSS1500 | CUEDC1 | 17 | 55981604/5598164<br>2/55982124                                                          | 3 | cg01667978/cg06723<br>357/cg17779676                                                         | 0.572390765 | 0.480803372 | 0.420474077 | -0.151916688 | 3.61E-08    | 2.62E-07    |

|         |         |    |                                                             |   |                                                                   |             |             |             |              |             |             |
|---------|---------|----|-------------------------------------------------------------|---|-------------------------------------------------------------------|-------------|-------------|-------------|--------------|-------------|-------------|
| TSS1500 | CUX2    | 12 | 111471192/111471309/111470672/111471489/111471202/111470657 | 6 | cg03223126/cg03352776/cg08710739/cg17190608/cg17420983/cg25752163 | 0.236283816 | 0.375212599 | 0.473772088 | 0.237488271  | 4.81E-06    | 1.91E-05    |
| TSS1500 | CXCL17  | 19 | 42947497/42948167/42948183                                  | 3 | cg02831955/cg03003745/cg16512640                                  | 0.439352955 | 0.359269161 | 0.285777527 | -0.153575428 | 2.59E-10    | 4.90E-09    |
| TSS1500 | CYP11A1 | 15 | 74658981/74659901/74659966/74660375/74660566/74661541       | 6 | cg00615746/cg06285340/cg08033551/cg20330630/cg24482024/cg24849517 | 0.717838877 | 0.633770951 | 0.554720156 | -0.163118721 | 3.37E-10    | 5.94E-09    |
| TSS1500 | CYP2E1  | 10 | 135340445/135340467/135340539                               | 3 | cg07381788/cg09208540/cg10986462                                  | 0.78078859  | 0.669798844 | 0.538530214 | -0.242258376 | 6.23E-07    | 3.16E-06    |
| TSS1500 | CYP2F1  | 19 | 41619850/41618922/41619952                                  | 3 | cg06210526/cg06579354/cg11267879                                  | 0.573804593 | 0.503680708 | 0.414374852 | -0.15942974  | 4.12E-08    | 2.94E-07    |
| TSS1500 | CYP7A1  | 8  | 59413152/59413577                                           | 2 | cg12010995/cg25634507                                             | 0.57989304  | 0.462345556 | 0.39455315  | -0.18533989  | 1.21E-06    | 5.62E-06    |
| TSS1500 | CYP8B1  | 3  | 42918806/42918546/42919025/42918681                         | 4 | cg07147573/cg09430445/cg14404298/cg26124860                       | 0.646690091 | 0.544080257 | 0.495478728 | -0.151211363 | 8.21E-11    | 2.12E-09    |
| TSS1500 | CYTH3   | 7  | 6313050/6312525/6313058/6312471                             | 4 | cg08893109/cg11248491/cg20492034/cg21622555                       | 0.470902514 | 0.383105812 | 0.313188644 | -0.15771387  | 1.42E-10    | 3.12E-09    |
| TSS1500 | DAAM2   | 6  | 39759941/39760092/39760416/39759955/39759966                | 5 | cg01499172/cg03698948/cg14135551/cg14436871/cg22174742            | 0.220202959 | 0.252259151 | 0.390301587 | 0.170098628  | 0.000272701 | 0.000731444 |
| TSS1500 | DAD1L   | 12 | 25072248/25071685                                           | 2 | cg20620180/cg23656890                                             | 0.801447998 | 0.690498103 | 0.606599314 | -0.194848684 | 2.60E-11    | 9.87E-10    |
| TSS1500 | DAPP1   | 4  | 100736658/100737138                                         | 2 | cg07814567/cg08103568                                             | 0.533942873 | 0.442471456 | 0.362133732 | -0.171809141 | 5.44E-10    | 8.51E-09    |
| TSS1500 | DBC1    | 9  | 122132103/122132178/122132052/122132379/122132054/122132261 | 6 | cg03625109/cg13685314/cg14445814/cg14470803/cg24818566/cg25935911 | 0.370155049 | 0.44613189  | 0.623822819 | 0.25366777   | 9.62E-08    | 6.14E-07    |
| TSS1500 | DBH     | 9  | 136500855/136500234                                         | 2 | cg21181594/cg25020204                                             | 0.552705915 | 0.460999194 | 0.379735759 | -0.172970156 | 2.73E-11    | 1.02E-09    |
| TSS1500 | DBNL    | 7  | 44083715/44083518/44083650/44084030                         | 4 | cg01100525/cg12979234/cg22785672/cg26086607                       | 0.542028373 | 0.412422661 | 0.32130347  | -0.220724902 | 9.10E-11    | 2.29E-09    |

|         |          |    |                                                                                         |   |                                                                                                         |             |             |             |              |             |             |
|---------|----------|----|-----------------------------------------------------------------------------------------|---|---------------------------------------------------------------------------------------------------------|-------------|-------------|-------------|--------------|-------------|-------------|
| TSS1500 | DBX1     | 11 | 20182644/2018269<br>5/20182122/201832<br>67/20182324/20183<br>057/20183008/2018<br>2575 | 8 | cg03299487/cg06340<br>987/cg10614045/cg1<br>5985775/cg18242712<br>/cg19375210/cg2273<br>7282/cg24592027 | 0.285077934 | 0.347769263 | 0.477267793 | 0.192189859  | 2.26E-07    | 1.30E-06    |
| TSS1500 | DCD      | 12 | 55043559/5504238<br>3/55042893                                                          | 3 | cg01687040/cg15016<br>120/cg16606256                                                                    | 0.58265091  | 0.486739959 | 0.383290977 | -0.199359933 | 1.62E-11    | 7.24E-10    |
| TSS1500 | DCT      | 13 | 95133339/9513221<br>1                                                                   | 2 | cg00777315/cg09189<br>889                                                                               | 0.504490475 | 0.411465261 | 0.313827236 | -0.190663239 | 1.21E-09    | 1.60E-08    |
| TSS1500 | DDIT4L   | 4  | 101111927/101111<br>872/101112317                                                       | 3 | cg05319305/cg08663<br>159/cg25071651                                                                    | 0.228163686 | 0.256218683 | 0.401769681 | 0.173605995  | 0.00032871  | 0.000867567 |
| TSS1500 | DEFA6    | 8  | 6783987                                                                                 | 1 | cg07974303                                                                                              | 0.84784069  | 0.711118117 | 0.640231432 | -0.207609258 | 4.37E-08    | 3.09E-07    |
| TSS1500 | DEFB104A | 8  | 7693516/7333711/7<br>332851/7332846                                                     | 4 | cg08528213/cg11604<br>418/cg14839256/cg2<br>0223677                                                     | 0.642295891 | 0.608098049 | 0.482084089 | -0.160211802 | 6.22E-06    | 2.41E-05    |
| TSS1500 | DEFB104B | 8  | 7693516/7333711/7<br>332851/7332846                                                     | 4 | cg08528213/cg11604<br>418/cg14839256/cg2<br>0223677                                                     | 0.642295891 | 0.608098049 | 0.482084089 | -0.160211802 | 6.22E-06    | 2.41E-05    |
| TSS1500 | DEFB118  | 20 | 29956062/2995602<br>8/29955259                                                          | 3 | cg03014957/cg14776<br>195/cg19453059                                                                    | 0.608358398 | 0.499009114 | 0.400476609 | -0.207881788 | 1.39E-09    | 1.78E-08    |
| TSS1500 | DEFB124  | 20 | 30061044/3006216<br>2/30061634                                                          | 3 | cg01981417/cg03529<br>184/cg25412387                                                                    | 0.611096032 | 0.517505344 | 0.426677582 | -0.18441845  | 5.29E-09    | 5.27E-08    |
| TSS1500 | DEFB129  | 20 | 207338/207161/207<br>144                                                                | 3 | cg00769470/cg09592<br>958/cg19931902                                                                    | 0.644156388 | 0.544957635 | 0.468910821 | -0.175245567 | 2.25E-11    | 8.82E-10    |
| TSS1500 | DEFB132  | 20 | 237300/237002/238<br>156                                                                | 3 | cg13151472/cg18011<br>148/cg18239253                                                                    | 0.742723733 | 0.682388137 | 0.590867042 | -0.151856691 | 1.75E-07    | 1.04E-06    |
| TSS1500 | DEFB135  | 8  | 11839138/1183853<br>2/11838843                                                          | 3 | cg01134551/cg08115<br>957/cg12807628                                                                    | 0.289032305 | 0.176061816 | 0.129372896 | -0.159659409 | 7.24E-13    | 1.19E-10    |
| TSS1500 | DEM1     | 1  | 40974057/4097413<br>2/40974110                                                          | 3 | cg04933954/cg04936<br>970/cg20771287                                                                    | 0.083618576 | 0.097920608 | 0.238202498 | 0.154583922  | 0.003830373 | 0.008143136 |
| TSS1500 | DEPDC7   | 11 | 33036664/3303739<br>7/33036574                                                          | 3 | cg00035630/cg07491<br>796/cg07675337                                                                    | 0.430156071 | 0.342611739 | 0.272290683 | -0.157865389 | 1.54E-10    | 3.32E-09    |
| TSS1500 | DGKG     | 3  | 186080868/186080<br>245/186080359/186<br>080243                                         | 4 | cg00434119/cg08675<br>193/cg23517298/cg2<br>5487529                                                     | 0.229783728 | 0.268326922 | 0.384716933 | 0.154933205  | 1.62E-05    | 5.70E-05    |
| TSS1500 | DGUOK    | 2  | 74153317/7415319<br>5/74153086/741532<br>13                                             | 4 | cg01629435/cg02478<br>828/cg08971637/cg1<br>9752861                                                     | 0.561847103 | 0.455869054 | 0.360101085 | -0.201746018 | 3.99E-10    | 6.74E-09    |

|         |                |    |                                                                                 |   |                                                                                         |             |             |             |              |             |             |
|---------|----------------|----|---------------------------------------------------------------------------------|---|-----------------------------------------------------------------------------------------|-------------|-------------|-------------|--------------|-------------|-------------|
| TSS1500 | DHRS7C         | 17 | 9695137/9696016/9694993                                                         | 3 | cg00352872/cg15476474/cg17444582                                                        | 0.581065413 | 0.513199864 | 0.429859223 | -0.15120619  | 3.26E-09    | 3.55E-08    |
| TSS1500 | DKFZp566F0947  | 19 | 31640194/31640249/31640401                                                      | 3 | cg12507030/cg20985037/cg23018111                                                        | 0.692995605 | 0.610901078 | 0.538937891 | -0.154057714 | 1.88E-08    | 1.51E-07    |
| TSS1500 | DKFZP686I15217 | 6  | 2986848/2987708/2986843                                                         | 3 | cg00184279/cg01454349/cg12335476                                                        | 0.665292253 | 0.507222892 | 0.410613164 | -0.254679089 | 8.22E-12    | 4.90E-10    |
| TSS1500 | DKK2           | 4  | 107958572/107958152/107957941/107958491                                         | 4 | cg01404615/cg03504865/cg14129775/cg25262044                                             | 0.209778004 | 0.293982674 | 0.422676613 | 0.212898609  | 1.05E-06    | 4.99E-06    |
| TSS1500 | DLX3           | 17 | 48073423/48072833                                                               | 2 | cg00594561/cg06864796                                                                   | 0.58151512  | 0.534061883 | 0.420075095 | -0.161440025 | 2.60E-08    | 1.99E-07    |
| TSS1500 | DNAH11         | 7  | 21582131/21582502/21582444                                                      | 3 | cg00016360/cg06270661/cg09447578                                                        | 0.350061853 | 0.346009398 | 0.53481313  | 0.184751277  | 2.94E-05    | 9.77E-05    |
| TSS1500 | DNAH6          | 2  | 84743142/84743263/84743279                                                      | 3 | cg08026651/cg09321363/cg10929210                                                        | 0.481577883 | 0.384332985 | 0.285897377 | -0.195680506 | 2.80E-08    | 2.12E-07    |
| TSS1500 | DNAH8          | 6  | 38690157/38689670                                                               | 2 | cg04581728/cg04897208                                                                   | 0.532745265 | 0.403037156 | 0.360058005 | -0.17268726  | 1.33E-07    | 8.20E-07    |
| TSS1500 | DNM1           | 9  | 130964374/130964918                                                             | 2 | cg00407062/cg14532894                                                                   | 0.561360988 | 0.438879403 | 0.37003195  | -0.191329038 | 7.27E-14    | 3.94E-11    |
| TSS1500 | DNMT3L         | 21 | 45683302/45683528/45683146/45683513                                             | 4 | cg09247319/cg27076046/cg27187798/cg27237537                                             | 0.756631602 | 0.694458174 | 0.588792827 | -0.167838774 | 3.19E-07    | 1.76E-06    |
| TSS1500 | DOK6           | 18 | 67067721/67067893/67067261/67067867                                             | 4 | cg05588496/cg12799689/cg24479776/cg27347269                                             | 0.346447457 | 0.428701092 | 0.563326977 | 0.21687952   | 3.62E-07    | 1.97E-06    |
| TSS1500 | DOPEY2         | 21 | 37536083/37535372/37536137                                                      | 3 | cg17946714/cg19413435/cg26080567                                                        | 0.654718378 | 0.559995444 | 0.502873067 | -0.151845312 | 8.79E-12    | 5.03E-10    |
| TSS1500 | DPM2           | 9  | 130701076                                                                       | 1 | cg00921973                                                                              | 0.57796396  | 0.486989906 | 0.384054164 | -0.193909796 | 8.12E-10    | 1.16E-08    |
| TSS1500 | DPP10          | 2  | 115919006/115919366/115918745/115199477/115919009                               | 5 | cg03753331/cg04617755/cg12666279/cg16146353/cg21678377                                  | 0.291421825 | 0.302930935 | 0.468908183 | 0.177486358  | 0.000401394 | 0.001041724 |
| TSS1500 | DPP4           | 2  | 162931397/162932048/162931638                                                   | 3 | cg11460364/cg20539283/cg23246095                                                        | 0.54862809  | 0.410740283 | 0.315133877 | -0.233494213 | 5.33E-11    | 1.60E-09    |
| TSS1500 | DPP6           | 7  | 153583318/153749206/153748818/154001891/154002064/153583867/153583563/153748370 | 8 | cg00017489/cg00446413/cg04083575/cg06002683/cg10552126/cg18252309/cg19161124/cg25502399 | 0.427256819 | 0.508095605 | 0.620565627 | 0.193308808  | 2.98E-09    | 3.31E-08    |

|         |         |    |                                                                                                               |   |                                                                                                                        |             |             |             |              |             |             |
|---------|---------|----|---------------------------------------------------------------------------------------------------------------|---|------------------------------------------------------------------------------------------------------------------------|-------------|-------------|-------------|--------------|-------------|-------------|
| TSS1500 | DPY19L2 | 12 | 64062724/6406256<br>4/64063071                                                                                | 3 | cg00845942/cg04455<br>164/cg16971885                                                                                   | 0.21846244  | 0.313160749 | 0.504428995 | 0.285966556  | 1.11E-08    | 9.69E-08    |
| TSS1500 | DRGX    | 10 | 50600265/5060074<br>4                                                                                         | 2 | cg10192713/cg17494<br>438                                                                                              | 0.63884408  | 0.546119314 | 0.468446602 | -0.170397478 | 1.32E-09    | 1.71E-08    |
| TSS1500 | DSCR6   | 21 | 38378539/3837793<br>8/38378406/383786<br>34                                                                   | 4 | cg04965987/cg12564<br>962/cg16345647/cg1<br>6886987                                                                    | 0.451410338 | 0.523641657 | 0.652791998 | 0.20138166   | 8.43E-10    | 1.19E-08    |
| TSS1500 | DSPP    | 4  | 88528262/8852833<br>1                                                                                         | 2 | cg03459617/cg21592<br>690                                                                                              | 0.62235408  | 0.492350011 | 0.405686    | -0.21666808  | 5.07E-09    | 5.10E-08    |
| TSS1500 | DTX1    | 12 | 113495386/113494<br>422/113494429/113<br>495037                                                               | 4 | cg04562491/cg10670<br>310/cg11939071/cg2<br>2685245                                                                    | 0.289817244 | 0.444244252 | 0.548626283 | 0.25880904   | 3.97E-09    | 4.18E-08    |
| TSS1500 | DUSP26  | 8  | 33458593/3345782<br>2                                                                                         | 2 | cg00441301/cg01869<br>632                                                                                              | 0.67953711  | 0.585778539 | 0.528670941 | -0.150866169 | 2.60E-06    | 1.11E-05    |
| TSS1500 | DYDC1   | 10 | 82117089/8211711<br>9/82117257                                                                                | 3 | cg03701427/cg06411<br>551/cg17703212                                                                                   | 0.341397575 | 0.543918117 | 0.676124495 | 0.33472692   | 4.04E-08    | 2.90E-07    |
| TSS1500 | DYM     | 18 | 46987532/4698778<br>6                                                                                         | 2 | cg12875426/cg23865<br>597                                                                                              | 0.73457248  | 0.706864103 | 0.575342257 | -0.159230223 | 0.000122798 | 0.000354828 |
| TSS1500 | DZIP1   | 13 | 96297197/9629733<br>8/96297224/962972<br>81                                                                   | 4 | cg04101379/cg05074<br>631/cg17922851/cg2<br>1627412                                                                    | 0.303140255 | 0.349764267 | 0.460832659 | 0.157692404  | 0.000359912 | 0.000943359 |
| TSS1500 | EBF1    | 5  | 158527817/158527<br>707/158527702/158<br>527982/158527469/<br>158528040/158527<br>573/158527463/158<br>527458 | 9 | cg00251610/cg01135<br>780/cg05056120/cg0<br>5774756/cg07607126<br>/cg15963563/cg1612<br>6280/cg16317459/cg<br>26664797 | 0.140235014 | 0.223235776 | 0.402209818 | 0.261974803  | 4.35E-07    | 2.30E-06    |
| TSS1500 | EBPL    | 13 | 50265850/5026599<br>1/50266227                                                                                | 3 | cg03658251/cg04663<br>916/cg20399252                                                                                   | 0.465668185 | 0.358645097 | 0.275350452 | -0.190317733 | 3.55E-11    | 1.23E-09    |
| TSS1500 | ECH1    | 19 | 39323158/3932306<br>0/39322968                                                                                | 3 | cg00204262/cg07859<br>880/cg13659813                                                                                   | 0.435535168 | 0.326156108 | 0.274216921 | -0.161318247 | 1.29E-08    | 1.10E-07    |

|         |       |    |                                                                                                                                                                                                                                                                                                                                                                                                                                                                                      |                                                                                                                                                                                                                                                                                                                                                                                                                                                                                                                                                                                   |                                      |             |             |             |              |          |          |
|---------|-------|----|--------------------------------------------------------------------------------------------------------------------------------------------------------------------------------------------------------------------------------------------------------------------------------------------------------------------------------------------------------------------------------------------------------------------------------------------------------------------------------------|-----------------------------------------------------------------------------------------------------------------------------------------------------------------------------------------------------------------------------------------------------------------------------------------------------------------------------------------------------------------------------------------------------------------------------------------------------------------------------------------------------------------------------------------------------------------------------------|--------------------------------------|-------------|-------------|-------------|--------------|----------|----------|
| TSS1500 | EDNRB | 13 | 78493182/7849365<br>7/78493561/785509<br>39/78493704/78494<br>064/78493878/7849<br>4330/78493651/784<br>94010/78493313/78<br>494272/78550373/7<br>8494442/78550384/<br>78493294/7849334<br>9/78493590/784939<br>20/78493305/78551<br>078/78493854/7849 42<br>3229/78493712/784<br>94171/78493297/78<br>493365/78494067/7<br>8493203/78493874/<br>78493564/7855006<br>9/78493232/784936<br>66/78493671/78493<br>215/78493205/7849<br>3282/78493958/784<br>94462/78493631/78<br>493583 | cg01910869/cg02147<br>695/cg06057566/cg0<br>6106063/cg07035515<br>/cg07974719/cg0832<br>1129/cg08634041/cg<br>09152886/cg0978638<br>3/cg10016380/cg107<br>64762/cg10792120/c<br>g11074192/cg123211<br>93/cg12602112/cg12<br>847373/cg12935136/<br>cg12983394/cg13434<br>989/cg13937208/cg1<br>6739796/cg18032190<br>/cg18568990/cg1911<br>1971/cg19650157/cg<br>19742055/cg1975950<br>2/cg19916212/cg213<br>64111/cg21675115/c<br>g22154447/cg223102<br>79/cg22541679/cg23<br>494140/cg23702615/<br>cg23766591/cg24236<br>409/cg24745738/cg2<br>4942919/cg25717994<br>/cg26022015 | 0.381633288                          | 0.455473798 | 0.542449532 | 0.160816244 | 8.83E-09     | 7.96E-08 |          |
| TSS1500 | EFHA2 | 8  | 16884225/1688419<br>7/16884364                                                                                                                                                                                                                                                                                                                                                                                                                                                       | 3                                                                                                                                                                                                                                                                                                                                                                                                                                                                                                                                                                                 | cg03919781/cg21653<br>826/cg23218760 | 0.179144757 | 0.265004541 | 0.489821532 | 0.310676775  | 4.01E-07 | 2.15E-06 |
| TSS1500 | EGFL7 | 9  | 139556554                                                                                                                                                                                                                                                                                                                                                                                                                                                                            | 1                                                                                                                                                                                                                                                                                                                                                                                                                                                                                                                                                                                 | cg05037688                           | 0.54490394  | 0.462024394 | 0.392028123 | -0.152875817 | 2.26E-06 | 9.79E-06 |
| TSS1500 | EGOT  | 3  | 4794061/4794082/4<br>794020                                                                                                                                                                                                                                                                                                                                                                                                                                                          | 3                                                                                                                                                                                                                                                                                                                                                                                                                                                                                                                                                                                 | cg02799411/cg05795<br>849/cg11600734 | 0.435363745 | 0.320693406 | 0.247763118 | -0.187600627 | 4.33E-11 | 1.40E-09 |
| TSS1500 | EHD3  | 2  | 31456217/3145589<br>0/31455443                                                                                                                                                                                                                                                                                                                                                                                                                                                       | 3                                                                                                                                                                                                                                                                                                                                                                                                                                                                                                                                                                                 | cg00648955/cg12045<br>528/cg13149833 | 0.713891333 | 0.637924717 | 0.541761407 | -0.172129926 | 1.33E-08 | 1.12E-07 |
| TSS1500 | EHF   | 11 | 34641925/3464246<br>3/34642303                                                                                                                                                                                                                                                                                                                                                                                                                                                       | 3                                                                                                                                                                                                                                                                                                                                                                                                                                                                                                                                                                                 | cg05503887/cg13084<br>525/cg14022090 | 0.445937695 | 0.336296294 | 0.271712023 | -0.174225672 | 8.21E-12 | 4.90E-10 |
| TSS1500 | EID3  | 12 | 104697193/104697<br>220/104697224                                                                                                                                                                                                                                                                                                                                                                                                                                                    | 3                                                                                                                                                                                                                                                                                                                                                                                                                                                                                                                                                                                 | cg01857475/cg09884<br>423/cg10572274 | 0.247947366 | 0.421289865 | 0.607087922 | 0.359140557  | 7.30E-10 | 1.07E-08 |



|         |         |    |                                                                   |   |                                                                               |             |             |             |              |          |             |
|---------|---------|----|-------------------------------------------------------------------|---|-------------------------------------------------------------------------------|-------------|-------------|-------------|--------------|----------|-------------|
| TSS1500 | EIF3G   | 19 | 10231566/1023171<br>1/10231701                                    | 3 | cg05328461/cg19766<br>988/cg26826183                                          | 0.558072095 | 0.435691902 | 0.32501452  | -0.233057575 | 3.49E-13 | 7.96E-11    |
| TSS1500 | EIF3K   | 19 | 39109076/3910945<br>6/39108723/391085<br>29/39108609/39108<br>672 | 6 | cg00233307/cg02306<br>730/cg04292549/cg1<br>5679651/cg19457477<br>/cg24337786 | 0.452079576 | 0.551410713 | 0.614407209 | 0.162327633  | 5.37E-08 | 3.70E-07    |
| TSS1500 | EIF5AL1 | 10 | 81271195/8127127<br>6/81271491                                    | 3 | cg13429435/cg16836<br>040/cg22529822                                          | 0.786189702 | 0.717451826 | 0.631736645 | -0.154453056 | 4.22E-10 | 7.00E-09    |
| TSS1500 | ELF1    | 13 | 41556827/4159490<br>4/41594509                                    | 3 | cg11793332/cg12691<br>679/cg25878131                                          | 0.615990328 | 0.539245564 | 0.462670591 | -0.153319737 | 1.11E-09 | 1.50E-08    |
| TSS1500 | ELTD1   | 1  | 79473783/7947291<br>7                                             | 2 | cg07692939/cg17750<br>919                                                     | 0.76251754  | 0.653689556 | 0.589304036 | -0.173213504 | 3.15E-05 | 0.000103915 |
| TSS1500 | EMCN    | 4  | 101440278/101440<br>020/101439954                                 | 3 | cg10512376/cg12532<br>667/cg24807169                                          | 0.514521912 | 0.408220706 | 0.301690146 | -0.212831766 | 5.10E-10 | 8.10E-09    |
| TSS1500 | EMR1    | 19 | 6886962                                                           | 1 | cg22889448                                                                    | 0.47911394  | 0.398218067 | 0.300828236 | -0.178285704 | 5.96E-10 | 9.11E-09    |
| TSS1500 | EMR4P   | 19 | 6991872                                                           | 1 | cg22840583                                                                    | 0.83419752  | 0.780525883 | 0.682766168 | -0.151431352 | 8.48E-05 | 0.000254395 |
| TSS1500 | ENTHD1  | 22 | 40290976/4029075<br>2                                             | 2 | cg00044729/cg10658<br>197                                                     | 0.749997188 | 0.689050206 | 0.595833443 | -0.154163744 | 4.72E-06 | 1.88E-05    |
| TSS1500 | EOMES   | 3  | 27764473/2776466<br>0/27765232/277652<br>83/27764810/27764<br>816 | 6 | cg01714811/cg02694<br>810/cg06014401/cg1<br>5540820/cg16971668<br>/cg22383888 | 0.27810847  | 0.367711204 | 0.52080839  | 0.24269992   | 1.60E-07 | 9.68E-07    |
| TSS1500 | EPHA3   | 3  | 89156118/8915607<br>1                                             | 2 | cg01360628/cg16797<br>972                                                     | 0.3478503   | 0.254859844 | 0.19639241  | -0.15145789  | 6.72E-08 | 4.50E-07    |
| TSS1500 | EPHA7   | 6  | 94129611/9412962<br>7/94129582/941296<br>36/94129697              | 5 | cg02168857/cg06740<br>629/cg08001895/cg2<br>1552709/cg22263131                | 0.186532958 | 0.25859245  | 0.4403509   | 0.253817942  | 3.71E-05 | 0.000120385 |
| TSS1500 | EPHX3   | 19 | 15345307/1534378<br>6/15344364/153441<br>86/15344239/15344<br>046 | 6 | cg05249937/cg08457<br>898/cg18366919/cg2<br>1595709/cg24745495<br>/cg26010734 | 0.373039106 | 0.439630137 | 0.564532494 | 0.191493388  | 6.99E-08 | 4.64E-07    |
| TSS1500 | EPPK1   | 8  | 144948315/144948<br>764/144948781                                 | 3 | cg04904458/cg06009<br>267/cg06668829                                          | 0.590361175 | 0.483683683 | 0.416666252 | -0.173694923 | 6.37E-10 | 9.62E-09    |
| TSS1500 | EREG    | 4  | 75229506/7523061<br>5/75230391                                    | 3 | cg08649765/cg11646<br>192/cg19308222                                          | 0.56094542  | 0.687410693 | 0.720377383 | 0.159431963  | 6.88E-09 | 6.46E-08    |
| TSS1500 | ESPNL   | 2  | 239007828/239007<br>919/239008679                                 | 3 | cg04003327/cg06574<br>296/cg21395812                                          | 0.650867595 | 0.556416356 | 0.489510782 | -0.161356813 | 6.45E-08 | 4.34E-07    |

|         |       |    |                                                                                         |                                                                                              |             |             |             |              |          |             |
|---------|-------|----|-----------------------------------------------------------------------------------------|----------------------------------------------------------------------------------------------|-------------|-------------|-------------|--------------|----------|-------------|
| TSS1500 | ETNK1 | 12 | 22777790/2277746<br>5/22777820/227774 5<br>09/22777430                                  | cg02550949/cg02723<br>291/cg11204099/cg1<br>7839399/cg21477262                               | 0.525872365 | 0.41147782  | 0.335001012 | -0.190871353 | 2.86E-07 | 1.60E-06    |
| TSS1500 | ETV3L | 1  | 157071076/157070<br>675/157070745/157 4<br>070730                                       | cg10956811/cg13981<br>120/cg22023197/cg2<br>4681898                                          | 0.799147855 | 0.740744667 | 0.642373186 | -0.156774669 | 1.21E-06 | 5.62E-06    |
| TSS1500 | EVC   | 4  | 5712581/5712676/5 3<br>712592                                                           | cg03881544/cg15305<br>511/cg26875219                                                         | 0.215831775 | 0.277033162 | 0.449048542 | 0.233216767  | 3.50E-05 | 0.000114069 |
| TSS1500 | EVC2  | 4  | 5710767/5712581/5<br>711301/5712676/57 6<br>10761/5712592                               | cg03278643/cg03881<br>544/cg09558315/cg1<br>5305511/cg17242664<br>/cg26875219                | 0.215831775 | 0.277033162 | 0.449048542 | 0.233216767  | 3.50E-05 | 0.000114069 |
| TSS1500 | EVI2B | 17 | 29641333 1                                                                              | cg05109049                                                                                   | 0.367865207 | 0.149288223 | 0.121072471 | -0.246792736 | 3.31E-07 | 1.82E-06    |
| TSS1500 | EVI5  | 1  | 93258319/9325828<br>8/93258908/932583 4<br>16                                           | cg00519208/cg04982<br>834/cg10989326/cg2<br>4699699                                          | 0.636497564 | 0.544050161 | 0.472102786 | -0.164394777 | 8.36E-10 | 1.19E-08    |
| TSS1500 | EXD3  | 9  | 140318662/140318<br>649/140318854 3                                                     | cg03383434/cg04837<br>071/cg14435671                                                         | 0.503200503 | 0.395513056 | 0.313456621 | -0.189743882 | 6.08E-11 | 1.71E-09    |
| TSS1500 | EXOC1 | 4  | 56718320/5671836 3<br>5/56719469                                                        | cg18463607/cg20618<br>651/cg26329992                                                         | 0.667689465 | 0.543687509 | 0.472212618 | -0.195476847 | 1.15E-11 | 5.74E-10    |
| TSS1500 | EXPH5 | 11 | 108410088/108464<br>931/108409825/108<br>464736/108409365/ 7<br>108423292/108423<br>325 | cg03062551/cg10022<br>155/cg11340537/cg2<br>0577535/cg20929568<br>/cg23322223/cg2375<br>5074 | 0.563015386 | 0.463764704 | 0.394688456 | -0.16832693  | 1.67E-13 | 6.23E-11    |

|         |         |    |                                                                                                                                                                                                                                                                                                   |    |                                                                                                                                                                                                                                                                                                                                |             |             |             |              |             |             |
|---------|---------|----|---------------------------------------------------------------------------------------------------------------------------------------------------------------------------------------------------------------------------------------------------------------------------------------------------|----|--------------------------------------------------------------------------------------------------------------------------------------------------------------------------------------------------------------------------------------------------------------------------------------------------------------------------------|-------------|-------------|-------------|--------------|-------------|-------------|
| TSS1500 | EYA4    | 6  | 133562275/133561716/133562101/133562269/133562035/133562196/133561630/133561765/133561368/133561898/133562246/133561886/133561649/133562193/133562056/133561614/133561224/133561647/133562267/133561932/133561866/133562258/133561660/133561677/133561756/133561386/133561719/133562087/133561814 | 29 | cg01162672/cg01957732/cg02446647/cg05062333/cg05493394/cg06181518/cg06525347/cg07327468/cg08885224/cg10675276/cg11518846/cg12152919/cg13912545/cg14017655/cg14343214/cg15729404/cg17348951/cg17985029/cg20286200/cg20330472/cg20611276/cg20980055/cg21296676/cg21390624/cg22462983/cg24535176/cg24842760/cg26449787/cg26501369 | 0.298127576 | 0.337609117 | 0.452043916 | 0.15391634   | 0.000802498 | 0.001954384 |
| TSS1500 | F10     | 13 | 113776252/113776873/113776126                                                                                                                                                                                                                                                                     | 3  | cg21367957/cg21714557/cg26608199                                                                                                                                                                                                                                                                                               | 0.74022244  | 0.634144169 | 0.564456584 | -0.175765856 | 2.51E-09    | 2.87E-08    |
| TSS1500 | F11R    | 1  | 160992358/160992352/160991549                                                                                                                                                                                                                                                                     | 3  | cg01423643/cg05754905/cg20012024                                                                                                                                                                                                                                                                                               | 0.646706065 | 0.567873411 | 0.485685563 | -0.161020502 | 4.99E-09    | 5.04E-08    |
| TSS1500 | F13B    | 1  | 197037504/197037732                                                                                                                                                                                                                                                                               | 2  | cg01488306/cg07839513                                                                                                                                                                                                                                                                                                          | 0.6148797   | 0.559666358 | 0.460119668 | -0.154760032 | 9.51E-08    | 6.08E-07    |
| TSS1500 | FAAH    | 1  | 46859671/46858748/46859680                                                                                                                                                                                                                                                                        | 3  | cg06911238/cg15198148/cg19921581                                                                                                                                                                                                                                                                                               | 0.59004246  | 0.468175033 | 0.365547773 | -0.224494687 | 9.20E-12    | 5.15E-10    |
| TSS1500 | FABP7   | 6  | 123099534/123100189                                                                                                                                                                                                                                                                               | 2  | cg18555555/cg21020855                                                                                                                                                                                                                                                                                                          | 0.61922     | 0.51319515  | 0.4618227   | -0.1573973   | 3.19E-08    | 2.36E-07    |
| TSS1500 | FADS2   | 11 | 61595494/61594997/61594965/61595485                                                                                                                                                                                                                                                               | 4  | cg05698098/cg06781209/cg21709803/cg23760165                                                                                                                                                                                                                                                                                    | 0.159061191 | 0.182416376 | 0.386897281 | 0.22783609   | 0.0001129   | 0.000328855 |
| TSS1500 | FAM129A | 1  | 184944785/184944153/184944109/184943911/184944288                                                                                                                                                                                                                                                 | 5  | cg12141056/cg18166655/cg19255053/cg24325991/cg25182523                                                                                                                                                                                                                                                                         | 0.566982912 | 0.501678851 | 0.407351065 | -0.159631847 | 1.03E-09    | 1.42E-08    |
| TSS1500 | FAM150A | 8  | 53478624/53478454/53478706                                                                                                                                                                                                                                                                        | 3  | cg05965392/cg17162024/cg26021627                                                                                                                                                                                                                                                                                               | 0.23671131  | 0.229776212 | 0.400791592 | 0.164080282  | 0.002115172 | 0.004734373 |

|         |         |    |                                                                                                                         |    |                                                                                                                                       |             |             |             |              |          |             |
|---------|---------|----|-------------------------------------------------------------------------------------------------------------------------|----|---------------------------------------------------------------------------------------------------------------------------------------|-------------|-------------|-------------|--------------|----------|-------------|
| TSS1500 | FAM155A | 13 | 108520039/108520<br>481/108519752/108<br>520391/108520189/<br>108520252/108520<br>827/108520945/108<br>520566/108519880 | 10 | cg03141482/cg05905<br>988/cg06446668/cg0<br>6833978/cg07034928<br>/cg13582072/cg1858<br>8768/cg22302985/cg<br>24567424/cg2598565<br>9 | 0.25719381  | 0.285549024 | 0.451570455 | 0.194376645  | 3.32E-05 | 0.000108905 |
| TSS1500 | FAM159B | 5  | 63985377/6398548<br>9/63985282/639853<br>74                                                                             | 4  | cg00811565/cg17035<br>996/cg18909711/cg2<br>7637940                                                                                   | 0.719465798 | 0.624303389 | 0.483779925 | -0.235685873 | 1.23E-10 | 2.83E-09    |
| TSS1500 | FAM179A | 2  | 29202812/2920283<br>6/29203230/292030<br>14                                                                             | 4  | cg02182081/cg04026<br>326/cg16944977/cg2<br>5553279                                                                                   | 0.549097928 | 0.439609308 | 0.376706627 | -0.1723913   | 3.39E-11 | 1.19E-09    |
| TSS1500 | FAM184B | 4  | 17783936/1778335<br>6/17783502                                                                                          | 3  | cg00306311/cg02816<br>816/cg07696699                                                                                                  | 0.391798968 | 0.4544131   | 0.596469302 | 0.204670335  | 2.83E-07 | 1.58E-06    |
| TSS1500 | FAM188B | 7  | 30810183/3081050<br>4                                                                                                   | 2  | cg02543636/cg27070<br>397                                                                                                             | 0.738768665 | 0.613962272 | 0.476933505 | -0.26183516  | 5.15E-10 | 8.14E-09    |
| TSS1500 | FAM18A  | 16 | 10913854/1091370<br>4/10913597                                                                                          | 3  | cg04482884/cg26636<br>054/cg27584980                                                                                                  | 0.803846268 | 0.724877311 | 0.6450552   | -0.158791068 | 1.59E-09 | 1.98E-08    |
| TSS1500 | FAM19A4 | 3  | 68982098/6898195<br>6/68982064                                                                                          | 3  | cg03427298/cg05893<br>614/cg08038353                                                                                                  | 0.428240753 | 0.465134535 | 0.607088792 | 0.178848039  | 1.33E-07 | 8.19E-07    |
| TSS1500 | FAM19A5 | 22 | 48970993/4897087<br>1/48884463/488849<br>60/48884945/48884<br>885/48884089/4897<br>1051                                 | 8  | cg02895639/cg02905<br>830/cg03196739/cg0<br>4304705/cg14894848<br>/cg23936463/cg2434<br>3361/cg25975712                               | 0.330864584 | 0.381474192 | 0.494202275 | 0.163337691  | 1.01E-07 | 6.40E-07    |
| TSS1500 | FAM38B  | 18 | 11149841/1114943<br>5/11149470/111497<br>63/11149068/11150<br>043                                                       | 6  | cg02664349/cg03117<br>976/cg03686593/cg0<br>6510438/cg10567810<br>/cg12673429                                                         | 0.341067111 | 0.492337197 | 0.61288286  | 0.271815749  | 2.66E-08 | 2.03E-07    |
| TSS1500 | FAM3D   | 3  | 58653593/5865289<br>7/58653196                                                                                          | 3  | cg02658330/cg21770<br>617/cg26334888                                                                                                  | 0.48546966  | 0.400412975 | 0.327898852 | -0.157570808 | 1.40E-10 | 3.09E-09    |
| TSS1500 | FAM55B  | 11 | 114548759/114548<br>872                                                                                                 | 2  | cg07340922/cg19113<br>081                                                                                                             | 0.645004755 | 0.482875078 | 0.366004345 | -0.27900041  | 2.73E-12 | 2.67E-10    |
| TSS1500 | FAM55D  | 11 | 114467115/114466<br>865                                                                                                 | 2  | cg22223402/cg27230<br>999                                                                                                             | 0.515671985 | 0.416182611 | 0.35739035  | -0.158281635 | 2.19E-08 | 1.72E-07    |
| TSS1500 | FAM5B   | 1  | 177140145/177140<br>203/177140322/177<br>140126/177140305/<br>177139876                                                 | 6  | cg04209911/cg06758<br>591/cg13685951/cg1<br>3843613/cg20846447<br>/cg22371227                                                         | 0.200418514 | 0.275819626 | 0.410171494 | 0.20975298   | 5.59E-07 | 2.87E-06    |
| TSS1500 | FAM71C  | 12 | 100041071                                                                                                               | 1  | cg14893473                                                                                                                            | 0.696000595 | 0.610819911 | 0.501094759 | -0.194905836 | 5.41E-06 | 2.12E-05    |

|         |         |    |                                                                                       |   |                                                                                              |             |             |             |              |          |             |
|---------|---------|----|---------------------------------------------------------------------------------------|---|----------------------------------------------------------------------------------------------|-------------|-------------|-------------|--------------|----------|-------------|
| TSS1500 | FAM71E2 | 19 | 55874851/5587606<br>0/55875605                                                        | 3 | cg01532284/cg16737<br>991/cg26367719                                                         | 0.73459156  | 0.642271446 | 0.572653405 | -0.161938155 | 3.42E-15 | 1.30E-11    |
| TSS1500 | FAM71F1 | 7  | 128354967/128354<br>965/128354862                                                     | 3 | cg10157098/cg12560<br>447/cg21351241                                                         | 0.596234335 | 0.517858906 | 0.412902732 | -0.183331603 | 2.73E-08 | 2.08E-07    |
| TSS1500 | FAM72A  | 1  | 206137774/206137<br>767/206137759/206<br>138116/206138190                             | 5 | cg05122861/cg09315<br>918/cg10439914/cg2<br>0259129/cg23089764                               | 0.099334954 | 0.198036057 | 0.316157556 | 0.216822601  | 1.36E-08 | 1.15E-07    |
| TSS1500 | FAM72B  | 1  | 120838644/120837<br>955/120838320/120<br>838718/120838323/<br>120838387/120838<br>445 | 7 | cg00183340/cg02905<br>065/cg07784526/cg0<br>8728856/cg18948743<br>/cg22493809/cg2510<br>3766 | 0.118222883 | 0.211454706 | 0.350380295 | 0.232157412  | 1.47E-09 | 1.87E-08    |
| TSS1500 | FAM72D  | 1  | 143913847/143913<br>418/143913409/143<br>913569/143913552                             | 5 | cg04968835/cg07344<br>025/cg16903605/cg1<br>9895380/cg22710840                               | 0.128562783 | 0.201122905 | 0.316391145 | 0.187828363  | 1.74E-09 | 2.14E-08    |
| TSS1500 | FAM74A3 | 9  | 40714141                                                                              | 1 | cg21009400                                                                                   | 0.61727257  | 0.519415711 | 0.416773918 | -0.200498652 | 1.21E-09 | 1.60E-08    |
| TSS1500 | FAM75A6 | 9  | 43631161                                                                              | 1 | cg10034990                                                                                   | 0.530349525 | 0.371002656 | 0.276844323 | -0.253505202 | 1.41E-13 | 5.41E-11    |
| TSS1500 | FAM81B  | 5  | 94726091/9472681<br>5/94726774                                                        | 3 | cg03304472/cg07721<br>901/cg23360388                                                         | 0.684618213 | 0.599003541 | 0.530422456 | -0.154195757 | 9.35E-09 | 8.38E-08    |
| TSS1500 | FAM83E  | 19 | 49118114/4911816<br>5                                                                 | 2 | cg00846121/cg04177<br>684                                                                    | 0.425278483 | 0.344719828 | 0.274001845 | -0.151276637 | 7.01E-11 | 1.88E-09    |
| TSS1500 | FAM92A3 | 4  | 183958214/183957<br>914/183957644                                                     | 3 | cg01615271/cg19843<br>540/cg25072945                                                         | 0.701164178 | 0.642677854 | 0.547825844 | -0.153338334 | 9.36E-07 | 4.51E-06    |
| TSS1500 | FAP     | 2  | 163101493/163100<br>512                                                               | 2 | cg03591467/cg20838<br>429                                                                    | 0.656710718 | 0.555828358 | 0.489021659 | -0.167689058 | 1.19E-09 | 1.58E-08    |
| TSS1500 | FASLG   | 1  | 172627039                                                                             | 1 | cg01880648                                                                                   | 0.81637039  | 0.767162278 | 0.662785045 | -0.153585345 | 5.78E-05 | 0.000179007 |
| TSS1500 | FAT2    | 5  | 150949152/150948<br>901/150950000                                                     | 3 | cg09801065/cg11356<br>004/cg26090075                                                         | 0.547446783 | 0.438098881 | 0.378423395 | -0.169023387 | 1.10E-08 | 9.61E-08    |
| TSS1500 | FBN2    | 5  | 127874478/127874<br>587/127873980/127<br>874463/127875163/<br>127874466/127874<br>825 | 7 | cg01939274/cg05686<br>497/cg06993118/cg1<br>1965976/cg20708842<br>/cg25532099/cg2722<br>3047 | 0.233092783 | 0.267891083 | 0.458669824 | 0.225577041  | 4.52E-05 | 0.000144079 |
| TSS1500 | FBXO40  | 3  | 121311075/121310<br>923                                                               | 2 | cg09824889/cg14974<br>147                                                                    | 0.82601353  | 0.757520125 | 0.643227477 | -0.182786053 | 3.94E-07 | 2.12E-06    |
| TSS1500 | FCGBP   | 19 | 40441647/4044146<br>9/40440963/404416<br>11                                           | 4 | cg03747345/cg17842<br>966/cg19103704/cg2<br>2509205                                          | 0.727675924 | 0.653342744 | 0.56820904  | -0.159466884 | 1.14E-08 | 9.91E-08    |
| TSS1500 | FCGR3B  | 1  | 161602335/161601<br>721/161602002                                                     | 3 | cg19234439/cg22504<br>013/cg26561570                                                         | 0.646229915 | 0.506448889 | 0.371795414 | -0.274434501 | 3.17E-12 | 2.85E-10    |

|         |        |    |                                                                                                               |    |                                                                                                                                     |             |             |             |              |          |          |
|---------|--------|----|---------------------------------------------------------------------------------------------------------------|----|-------------------------------------------------------------------------------------------------------------------------------------|-------------|-------------|-------------|--------------|----------|----------|
| TSS1500 | FCN2   | 9  | 137771506                                                                                                     | 1  | cg26164184                                                                                                                          | 0.75138032  | 0.619819144 | 0.498994923 | -0.252385397 | 3.40E-08 | 2.50E-07 |
| TSS1500 | FCRL1  | 1  | 157790499/157790434                                                                                           | 2  | cg22515937/cg24344394                                                                                                               | 0.82022193  | 0.743530061 | 0.638941868 | -0.181280062 | 2.42E-07 | 1.39E-06 |
| TSS1500 | FCRL3  | 1  | 157671386/157671759/157670869/157672074                                                                       | 4  | cg05384663/cg15202552/cg19602479/cg24881910                                                                                         | 0.730430815 | 0.608402315 | 0.521511495 | -0.20891932  | 1.39E-08 | 1.17E-07 |
| TSS1500 | FCRLB  | 1  | 161691911/161691663/161691014/161692247                                                                       | 4  | cg00160981/cg17036419/cg22678092/cg26015133                                                                                         | 0.707141973 | 0.596650057 | 0.519515608 | -0.187626366 | 7.20E-10 | 1.07E-08 |
| TSS1500 | FERD3L | 7  | 19185260/19185407/19185267                                                                                    | 3  | cg07270153/cg10043037/cg23054426                                                                                                    | 0.235090854 | 0.267454665 | 0.413280798 | 0.178189944  | 4.90E-06 | 1.94E-05 |
| TSS1500 | FEV    | 2  | 219851181                                                                                                     | 1  | cg18664514                                                                                                                          | 0.310611665 | 0.235495761 | 0.150289331 | -0.160322334 | 6.50E-10 | 9.75E-09 |
| TSS1500 | FEZ2   | 2  | 36825736/36825888/36825704                                                                                    | 3  | cg01206211/cg07416916/cg09467607                                                                                                    | 0.631230878 | 0.55758738  | 0.458600571 | -0.172630307 | 1.87E-07 | 1.11E-06 |
| TSS1500 | FEZF2  | 3  | 62360464/62359420/62360240/62360674/62359773/62359924/62359677/62360417/62359390/62359392/62359456/62360162   | 12 | cg04927889/cg06423920/cg06707343/cg06819546/cg08252579/cg08681924/cg11374425/cg14261840/cg15812348/cg19227130/cg24705960/cg27564792 | 0.229878165 | 0.309906044 | 0.437997543 | 0.208119379  | 1.02E-06 | 4.86E-06 |
| TSS1500 | FFAR3  | 19 | 35849024/35849176/35848801                                                                                    | 3  | cg01047748/cg15391601/cg21624359                                                                                                    | 0.692702305 | 0.561318139 | 0.463317859 | -0.229384446 | 1.22E-08 | 1.05E-07 |
| TSS1500 | FGF10  | 5  | 44389769/44389406/44389062/44389848/44390215/44389282                                                         | 6  | cg06850283/cg08976810/cg09792008/cg13996155/cg16536718/cg20387341                                                                   | 0.355421997 | 0.4201884   | 0.535410554 | 0.179988557  | 3.14E-08 | 2.34E-07 |
| TSS1500 | FGF12  | 3  | 192127991/192445594/192127457/192446883/192127327/192127330/192127356                                         | 7  | cg01255414/cg03401266/cg08002883/cg09725157/cg10511904/cg16376000/cg17393267                                                        | 0.330327825 | 0.472380506 | 0.604079386 | 0.27375156   | 3.08E-11 | 1.11E-09 |
| TSS1500 | FGF14  | 13 | 103055487/103054743/102569538/103054846/102570476/102569894/102570482/103054752/103054860/102569876/102569815 | 11 | cg00273543/cg04046599/cg05210258/cg06960698/cg11897909/cg15972331/cg17810588/cg21448145/cg21513836/cg23809442/cg27134816            | 0.231418779 | 0.293870246 | 0.409459493 | 0.178040714  | 7.48E-09 | 6.94E-08 |

|         |          |    |                                                             |                                                                |             |             |             |              |             |             |
|---------|----------|----|-------------------------------------------------------------|----------------------------------------------------------------|-------------|-------------|-------------|--------------|-------------|-------------|
| TSS1500 | FGF2     | 4  | 123747634/123747<br>558/123747542/123 5<br>747533/123747447 | cg03941587/cg11327<br>857/cg17214107/cg2<br>1550024/cg24683623 | 0.56496432  | 0.67285939  | 0.732034869 | 0.167070549  | 1.82E-11    | 7.71E-10    |
| TSS1500 | FGF5     | 4  | 81186795/8118712<br>5/81187011/811871 5<br>98/81186901      | cg05894124/cg10218<br>799/cg12087412/cg1<br>8638496/cg21477508 | 0.166089672 | 0.211075347 | 0.431028501 | 0.26493883   | 1.97E-07    | 1.16E-06    |
| TSS1500 | FGF7     | 15 | 49713977                                                    | cg27039983                                                     | 0.79558028  | 0.689933628 | 0.569927141 | -0.225653139 | 4.47E-07    | 2.36E-06    |
| TSS1500 | FGF8     | 10 | 103536348/103536<br>063/103536342                           | cg06169131/cg16248<br>277/cg25209842                           | 0.311807978 | 0.442923196 | 0.550929223 | 0.239121244  | 1.34E-08    | 1.13E-07    |
| TSS1500 | FGFBP3   | 10 | 93669852                                                    | cg02631917                                                     | 0.785741315 | 0.695652361 | 0.616623991 | -0.169117324 | 9.84E-06    | 3.63E-05    |
| TSS1500 | FHAD1    | 1  | 15573457/1557356<br>6/15573050/155735 4<br>25               | cg00524963/cg02394<br>978/cg13234882/cg1<br>7750038            | 0.666546743 | 0.584749344 | 0.510991039 | -0.155555704 | 1.65E-08    | 1.35E-07    |
| TSS1500 | FHL5     | 6  | 97009594/9701007<br>1                                       | cg15802639/cg20719<br>439                                      | 0.68488086  | 0.600364925 | 0.462790959 | -0.222089901 | 1.30E-10    | 2.93E-09    |
| TSS1500 | FKBPL    | 6  | 32099450/3209956<br>4/32098344/320983 4<br>46               | cg03514937/cg07790<br>778/cg08577517/cg1<br>6437896            | 0.692362945 | 0.529541622 | 0.446631627 | -0.245731318 | 1.40E-09    | 1.79E-08    |
| TSS1500 | FKSG83   | 6  | 27291585/2729136<br>3/27292364                              | cg04988917/cg07968<br>979/cg09240001                           | 0.68586384  | 0.5926793   | 0.523708627 | -0.162155213 | 0.000290136 | 0.000773833 |
| TSS1500 | FLG      | 1  | 152299041/152298<br>884/152299078                           | cg10500702/cg13447<br>818/cg26390526                           | 0.74868366  | 0.658341672 | 0.5224244   | -0.22625926  | 9.07E-09    | 8.15E-08    |
| TSS1500 | FLG2     | 1  | 152333922/152333<br>423/152333596                           | cg03439811/cg03957<br>898/cg23812489                           | 0.48509233  | 0.334225467 | 0.227919445 | -0.257172885 | 7.77E-10    | 1.12E-08    |
| TSS1500 | FLJ20184 | 4  | 106472990/106473<br>040/106473233                           | cg08970682/cg14020<br>824/cg25370441                           | 0.442739302 | 0.365685204 | 0.28381527  | -0.158924032 | 1.37E-09    | 1.77E-08    |
| TSS1500 | FLJ25758 | 19 | 7007910/7007104                                             | cg01993907/cg27270<br>214                                      | 0.654019365 | 0.523425708 | 0.398617102 | -0.255402263 | 1.92E-11    | 8.02E-10    |
| TSS1500 | FLJ33360 | 5  | 6338418/6338017/6<br>338529/6338794                         | cg02202411/cg02328<br>035/cg17491560/cg2<br>2778952            | 0.7507706   | 0.694758528 | 0.477771682 | -0.272998918 | 1.85E-08    | 1.49E-07    |
| TSS1500 | FLJ37307 | 13 | 52419714/5241968<br>9                                       | cg16096766/cg18997<br>137                                      | 0.490066513 | 0.389937956 | 0.307269466 | -0.182797047 | 1.05E-12    | 1.52E-10    |
| TSS1500 | FLJ41562 | 4  | 69084723                                                    | cg23645302                                                     | 0.49640466  | 0.398810878 | 0.319981855 | -0.176422805 | 7.88E-09    | 7.25E-08    |
| TSS1500 | FLJ45079 | 17 | 75880542/7588109<br>3/75881232                              | cg04837616/cg09889<br>477/cg11598872                           | 0.595361763 | 0.499064048 | 0.413521735 | -0.181840028 | 4.13E-09    | 4.32E-08    |
| TSS1500 | FLJ46361 | 10 | 124515334/124514<br>711                                     | cg10038490/cg24310<br>126                                      | 0.69962434  | 0.630215064 | 0.51887257  | -0.18075177  | 5.23E-07    | 2.71E-06    |

|         |        |    |                                                                                                                                                                                                                                          |    |                                                                                                                                                                                                                                                                                        |             |             |             |              |             |             |
|---------|--------|----|------------------------------------------------------------------------------------------------------------------------------------------------------------------------------------------------------------------------------------------|----|----------------------------------------------------------------------------------------------------------------------------------------------------------------------------------------------------------------------------------------------------------------------------------------|-------------|-------------|-------------|--------------|-------------|-------------|
| TSS1500 | FLRT2  | 14 | 85996202/8599572<br>6/85996260/859958<br>59/85996274/85995<br>655/85996101                                                                                                                                                               | 7  | cg02305242/cg10406<br>690/cg12080751/cg1<br>2155356/cg18845692<br>/cg23934295/cg2665<br>1233                                                                                                                                                                                           | 0.218268422 | 0.301255612 | 0.465920785 | 0.247652364  | 9.41E-08    | 6.03E-07    |
| TSS1500 | FMO9P  | 1  | 166571691/166572<br>716                                                                                                                                                                                                                  | 2  | cg24117017/cg24272<br>559                                                                                                                                                                                                                                                              | 0.61617929  | 0.515784328 | 0.452963773 | -0.163215517 | 0.000766794 | 0.001874648 |
| TSS1500 | FN3KRP | 17 | 80673184/8067422<br>1/80673958/806741<br>89/80673675                                                                                                                                                                                     | 5  | cg11026808/cg11954<br>715/cg14688272/cg2<br>1624854/cg23522895                                                                                                                                                                                                                         | 0.733421112 | 0.640418881 | 0.551613855 | -0.181807257 | 1.05E-10    | 2.53E-09    |
| TSS1500 | FNDC1  | 6  | 159589874/159589<br>483/159590059/159<br>590155                                                                                                                                                                                          | 4  | cg08397344/cg08631<br>819/cg09107912/cg0<br>9375620                                                                                                                                                                                                                                    | 0.263319685 | 0.299042562 | 0.425179148 | 0.161859463  | 0.000100507 | 0.000296766 |
| TSS1500 | FOXC2  | 16 | 86599976/8659946<br>8/86600499/866003<br>09/86600326/86599<br>745/86599714/8660<br>0389                                                                                                                                                  | 8  | cg01296593/cg02187<br>214/cg02943578/cg0<br>7249459/cg09360770<br>/cg10448808/cg2309<br>6689/cg24063470                                                                                                                                                                                | 0.277226397 | 0.325394744 | 0.474970348 | 0.197743951  | 3.08E-06    | 1.29E-05    |
| TSS1500 | FOXE1  | 9  | 100615244/100614<br>879/100615084/100<br>615201                                                                                                                                                                                          | 4  | cg02157015/cg13564<br>742/cg13827859/cg1<br>5802898                                                                                                                                                                                                                                    | 0.214906266 | 0.291284665 | 0.413989536 | 0.199083271  | 4.26E-07    | 2.27E-06    |
| TSS1500 | FOXG1  | 14 | 29236008/2923601<br>7/29234981/292359<br>73/29235448/29235<br>092/29236013/2923<br>5376/29235907/292<br>35196/29235928/29<br>235984/29235904/2<br>9235469/29235123/<br>29234978/2923589<br>4/29235193/292348<br>90/29234904/29236<br>034 | 21 | cg02681442/cg02991<br>338/cg03523785/cg0<br>4525757/cg07150445<br>/cg07974473/cg0812<br>0263/cg09231862/cg<br>10912240/cg1603812<br>0/cg18299578/cg197<br>14132/cg19786627/c<br>g21923619/cg231919<br>56/cg23571812/cg24<br>981833/cg25078444/<br>cg26194477/cg26206<br>396/cg27006650 | 0.311992748 | 0.354651158 | 0.500559358 | 0.18856661   | 3.77E-05    | 0.000121974 |
| TSS1500 | FOXI1  | 5  | 169532702/169532<br>686/169531595                                                                                                                                                                                                        | 3  | cg01106114/cg08560<br>074/cg21503476                                                                                                                                                                                                                                                   | 0.613300032 | 0.511036241 | 0.460781186 | -0.152518845 | 2.08E-10    | 4.15E-09    |



|         |        |    |                                                                                                                               |    |                                                                                                                                                           |             |             |             |              |          |          |
|---------|--------|----|-------------------------------------------------------------------------------------------------------------------------------|----|-----------------------------------------------------------------------------------------------------------------------------------------------------------|-------------|-------------|-------------|--------------|----------|----------|
| TSS1500 | FOXI2  | 10 | 129534182/129534613/129535138/129534411/129534217/129534722/129534107/129535186                                               | 8  | cg00405688/cg02523640/cg04617948/cg06213468/cg18047662/cg24826696/cg25043050/cg25539045                                                                   | 0.376623567 | 0.445151151 | 0.551313015 | 0.174689448  | 4.68E-06 | 1.87E-05 |
| TSS1500 | FPR3   | 19 | 52297968/52297519                                                                                                             | 2  | cg06784466/cg23886141                                                                                                                                     | 0.50555781  | 0.473946097 | 0.336397845 | -0.169159965 | 2.33E-09 | 2.69E-08 |
| TSS1500 | FRMPD2 | 10 | 49483356/49483700                                                                                                             | 2  | cg05859842/cg14979482                                                                                                                                     | 0.66701264  | 0.589427406 | 0.508465536 | -0.158547104 | 6.37E-06 | 2.46E-05 |
| TSS1500 | FSHB   | 11 | 30251197/30251556/30251473                                                                                                    | 3  | cg15159060/cg17685019/cg27420123                                                                                                                          | 0.415140167 | 0.319891044 | 0.2424729   | -0.172667267 | 5.88E-14 | 3.40E-11 |
| TSS1500 | FUT2   | 19 | 49197853/49198900/49198516                                                                                                    | 3  | cg15197218/cg19025034/cg22654949                                                                                                                          | 0.657818793 | 0.538283989 | 0.462275253 | -0.19554354  | 1.97E-10 | 3.98E-09 |
| TSS1500 | FUT3   | 19 | 5852498/5851762                                                                                                               | 2  | cg02284900/cg24314434                                                                                                                                     | 0.47289072  | 0.368456239 | 0.2974476   | -0.17544312  | 4.83E-11 | 1.51E-09 |
| TSS1500 | FUT4   | 11 | 94276072/94275751                                                                                                             | 2  | cg18834652/cg24256772                                                                                                                                     | 0.704500418 | 0.617967569 | 0.523169295 | -0.181331122 | 4.17E-11 | 1.37E-09 |
| TSS1500 | FUT9   | 6  | 96463185/96463246/96462814                                                                                                    | 3  | cg01837719/cg22782271/cg23997263                                                                                                                          | 0.38322732  | 0.452863714 | 0.671393257 | 0.288165937  | 2.47E-10 | 4.71E-09 |
| TSS1500 | FZD10  | 12 | 130645645/130646461/130646022/130646129/130646256/130646370/130646497/130645566                                               | 8  | cg02214745/cg02291403/cg09048530/cg17537177/cg18209212/cg20058043/cg21386611/cg22813950                                                                   | 0.29197381  | 0.332261222 | 0.541514312 | 0.249540502  | 9.37E-08 | 6.01E-07 |
| TSS1500 | GABRA6 | 5  | 161111187/161112334/161111441                                                                                                 | 3  | cg16404898/cg19537070/cg22691257                                                                                                                          | 0.587408405 | 0.470572333 | 0.369624839 | -0.217783566 | 3.52E-13 | 7.96E-11 |
| TSS1500 | GABRG3 | 15 | 27215962/27216008/27215997/27215757/27216012/27215448/27215457/27215971/27216088/27215898/27215622/27215952/27215681/27216083 | 14 | cg02069715/cg02281208/cg03024760/cg04646186/cg08182446/cg08460080/cg08920810/cg09257796/cg12919520/cg16384136/cg20362634/cg21711132/cg26508619/cg27553667 | 0.583282203 | 0.65619416  | 0.738250959 | 0.154968757  | 3.98E-10 | 6.73E-09 |
| TSS1500 | GABRR3 | 3  | 97754720                                                                                                                      | 1  | cg11726229                                                                                                                                                | 0.680513285 | 0.527521344 | 0.427380682 | -0.253132603 | 3.53E-09 | 3.78E-08 |
| TSS1500 | GAD2   | 10 | 26504580/26504950/26504013/26504969/26503897/26504259                                                                         | 6  | cg11500467/cg12527175/cg24097797/cg24820783/cg25835733/cg27372732                                                                                         | 0.268145307 | 0.349401824 | 0.494764204 | 0.226618897  | 8.94E-08 | 5.77E-07 |

|         |         |    |                                                                                                                                                                                                       |                                                                                                                                                                                                                                               |             |             |             |              |          |             |
|---------|---------|----|-------------------------------------------------------------------------------------------------------------------------------------------------------------------------------------------------------|-----------------------------------------------------------------------------------------------------------------------------------------------------------------------------------------------------------------------------------------------|-------------|-------------|-------------|--------------|----------|-------------|
| TSS1500 | GAL3ST2 | 2  | 242715019/242715<br>022/242715549/242 4<br>715041                                                                                                                                                     | cg04144151/cg13345<br>353/cg15072976/cg2<br>0302497                                                                                                                                                                                           | 0.590108107 | 0.499956254 | 0.426985498 | -0.163122608 | 9.73E-09 | 8.66E-08    |
| TSS1500 | GALNT13 | 2  | 154728210/154727<br>485/154727907/154<br>728133/154728062/ 7<br>154727925/154728<br>202                                                                                                               | cg07547000/cg08042<br>220/cg12398124/cg1<br>2424785/cg14635767<br>/cg21998983/cg2698<br>3710                                                                                                                                                  | 0.398731636 | 0.398701913 | 0.550407905 | 0.151676268  | 4.84E-07 | 2.53E-06    |
| TSS1500 | GALNTL2 | 3  | 16215248/1621531 3<br>5/16215032                                                                                                                                                                      | cg05287437/cg06853<br>602/cg18772158                                                                                                                                                                                                          | 0.651893463 | 0.615331067 | 0.48970773  | -0.162185733 | 7.31E-07 | 3.63E-06    |
| TSS1500 | GALNTL6 | 4  | 172734276/172734<br>347/172734031/172<br>733566/172733760/ 6<br>172734266                                                                                                                             | cg03304610/cg05295<br>006/cg05678100/cg0<br>9892710/cg17896776<br>/cg26814276                                                                                                                                                                 | 0.318865286 | 0.409996313 | 0.609992463 | 0.291127177  | 9.12E-11 | 2.29E-09    |
| TSS1500 | GALP    | 19 | 56686707/5668640<br>6/56686339                                                                                                                                                                        | cg01454134/cg07682<br>659/cg13688765                                                                                                                                                                                                          | 0.706592948 | 0.611872036 | 0.540568214 | -0.166024734 | 8.84E-08 | 5.70E-07    |
| TSS1500 | GAP43   | 3  | 115340791/115341<br>135/115341429                                                                                                                                                                     | cg05773207/cg07863<br>831/cg27608911                                                                                                                                                                                                          | 0.802694753 | 0.715902007 | 0.622085358 | -0.180609396 | 1.30E-08 | 1.10E-07    |
| TSS1500 | GAPDHS  | 19 | 36023054/3602390<br>9                                                                                                                                                                                 | cg07868917/cg14946<br>950                                                                                                                                                                                                                     | 0.71102107  | 0.611907956 | 0.496276559 | -0.214744511 | 1.09E-08 | 9.55E-08    |
| TSS1500 | GATA5   | 20 | 61051685/6105154<br>8/61051802/610519<br>15/61051795/61051<br>432/61051585/6105<br>1348/61051777/610<br>51341/61051438/61<br>051751/61052060/6<br>1051561/61051317/<br>61051423/6105176<br>2/61051667 | cg00677866/cg02146<br>001/cg03777459/cg0<br>4742780/cg07914822<br>/cg08568720/cg0933<br>9194/cg11982072/cg<br>14388488/cg1671405<br>5/cg18278265/cg188<br>72321/cg20525917/c<br>g23770904/cg243206<br>12/cg24500900/cg25<br>667841/cg25988317 | 0.220801963 | 0.29125495  | 0.405140576 | 0.184338613  | 9.14E-05 | 0.000272471 |
| TSS1500 | GC      | 4  | 72651102/7265099<br>2/72650088                                                                                                                                                                        | cg02087383/cg07376<br>029/cg09816180                                                                                                                                                                                                          | 0.655018298 | 0.554332611 | 0.456003933 | -0.199014364 | 3.12E-08 | 2.33E-07    |
| TSS1500 | GCM2    | 6  | 10882927/1088310<br>5/10882336/108833<br>76/10882974/10883<br>054/10882326                                                                                                                            | cg08510658/cg10074<br>727/cg14000361/cg1<br>5244049/cg17991695<br>/cg19951298/cg2432<br>9557                                                                                                                                                  | 0.326755807 | 0.395915067 | 0.543143625 | 0.216387818  | 6.69E-09 | 6.34E-08    |

|         |       |    |                                                                                                                                                                                                                                                                      |                                                                                                                                                                                                                                                                                        |             |             |             |              |             |             |
|---------|-------|----|----------------------------------------------------------------------------------------------------------------------------------------------------------------------------------------------------------------------------------------------------------------------|----------------------------------------------------------------------------------------------------------------------------------------------------------------------------------------------------------------------------------------------------------------------------------------|-------------|-------------|-------------|--------------|-------------|-------------|
| TSS1500 | GCOM1 | 15 | 57883511/5788342<br>7/57883722/578833 4<br>92                                                                                                                                                                                                                        | cg07084709/cg20043<br>937/cg22184210/cg2<br>2708112                                                                                                                                                                                                                                    | 0.634315612 | 0.516472202 | 0.425577895 | -0.208737716 | 3.67E-11    | 1.26E-09    |
| TSS1500 | GDE1  | 16 | 19533815/1953485 2                                                                                                                                                                                                                                                   | cg06784594/cg27259<br>633                                                                                                                                                                                                                                                              | 0.70235553  | 0.550445267 | 0.462975068 | -0.239380462 | 1.39E-12    | 1.75E-10    |
| TSS1500 | GDF6  | 8  | 97173526/9717372<br>2/97173466/971743 5<br>82/97173335                                                                                                                                                                                                               | cg03734437/cg05447<br>833/cg05552220/cg0<br>9730795/cg19939997                                                                                                                                                                                                                         | 0.263622577 | 0.324730486 | 0.443267773 | 0.179645196  | 3.95E-05    | 0.000127246 |
| TSS1500 | GFRA1 | 10 | 118032626/118032<br>355/118032033/118<br>032892/118033581/<br>118033312/118033<br>762/118033370/118<br>032872/118033115/<br>118032081/118032 21<br>879/118032330/118<br>033902/118034031/<br>118032948/118034<br>357/118032987/118<br>033273/118033290/<br>118032905 | cg03503087/cg04983<br>142/cg06039355/cg0<br>8194313/cg09146197<br>/cg11390957/cg1184<br>2610/cg12087643/cg<br>13346013/cg1389070<br>6/cg18044663/cg186<br>72939/cg19236679/c<br>g20095233/cg235241<br>95/cg23898073/cg24<br>012811/cg25022687/<br>cg25351565/cg25617<br>725/cg27341926 | 0.221108251 | 0.304943749 | 0.445879434 | 0.224771184  | 1.17E-05    | 4.26E-05    |
| TSS1500 | GFRA2 | 8  | 21647596/2164666<br>2/21647026/216467 4<br>04                                                                                                                                                                                                                        | cg03330485/cg03453<br>638/cg05021638/cg1<br>4072903                                                                                                                                                                                                                                    | 0.238076203 | 0.245361925 | 0.397112514 | 0.159036311  | 0.000235296 | 0.000639156 |
| TSS1500 | GFRA1 | 6  | 55190909/5519204 2<br>9                                                                                                                                                                                                                                              | cg11823729/cg23978<br>358                                                                                                                                                                                                                                                              | 0.584753985 | 0.453854192 | 0.318581841 | -0.266172144 | 4.48E-13    | 8.76E-11    |
| TSS1500 | GGT6  | 17 | 4464379/4464294/4 3<br>464400                                                                                                                                                                                                                                        | cg01819502/cg21805<br>880/cg22628873                                                                                                                                                                                                                                                   | 0.633037058 | 0.514170641 | 0.458532962 | -0.174504096 | 2.10E-08    | 1.66E-07    |
| TSS1500 | GHITM | 10 | 85898700/8589864 2<br>9                                                                                                                                                                                                                                              | cg12706330/cg25783<br>892                                                                                                                                                                                                                                                              | 0.508170923 | 0.353381897 | 0.258773808 | -0.249397115 | 1.84E-11    | 7.74E-10    |
| TSS1500 | GHSR  | 3  | 172167445/172167<br>644/172166987/172<br>166920/172166517/ 8<br>172167527/172167<br>030/172167610                                                                                                                                                                    | cg04851268/cg06737<br>494/cg07848409/cg1<br>1812218/cg14768785<br>/cg22070855/cg2245<br>9146/cg23500122                                                                                                                                                                                | 0.359082754 | 0.42709868  | 0.551867745 | 0.192784991  | 2.28E-08    | 1.78E-07    |
| TSS1500 | GIP   | 17 | 47046292 1                                                                                                                                                                                                                                                           | cg20551517                                                                                                                                                                                                                                                                             | 0.83768907  | 0.659426294 | 0.564808618 | -0.272880452 | 9.22E-08    | 5.93E-07    |
| TSS1500 | GIPC1 | 19 | 14607318/1460738<br>4/14607713/146075 5<br>97/14608092                                                                                                                                                                                                               | cg08312600/cg13825<br>475/cg14528319/cg2<br>2760304/cg27651355                                                                                                                                                                                                                         | 0.477127523 | 0.403001694 | 0.316530952 | -0.160596572 | 3.56E-10    | 6.22E-09    |

|         |         |    |                                                                                                   |   |                                                                                                         |             |             |             |              |             |             |
|---------|---------|----|---------------------------------------------------------------------------------------------------|---|---------------------------------------------------------------------------------------------------------|-------------|-------------|-------------|--------------|-------------|-------------|
| TSS1500 | GIPC2   | 1  | 78511360/7851134<br>4/78511235/785111 4<br>40                                                     | 4 | cg09826056/cg19766<br>489/cg20785560/cg2<br>6263401                                                     | 0.421805445 | 0.32802308  | 0.266652909 | -0.155152536 | 1.46E-10    | 3.19E-09    |
| TSS1500 | GIPC3   | 19 | 3584954                                                                                           | 1 | cg01895124                                                                                              | 0.6403884   | 0.547575233 | 0.426509755 | -0.213878645 | 4.28E-11    | 1.39E-09    |
| TSS1500 | GJC2    | 1  | 228336474/228337<br>311/228336130/228 5<br>337181/228336717                                       | 5 | cg00393263/cg01789<br>576/cg22844623/cg2<br>4052475/cg25136124                                          | 0.65882737  | 0.575216417 | 0.474556886 | -0.184270484 | 9.29E-10    | 1.30E-08    |
| TSS1500 | GJD2    | 15 | 35047023/3504718<br>9/35047203/350474<br>11/35047394/35047 7<br>942/35047401                      | 7 | cg08095196/cg10386<br>483/cg16729415/cg1<br>8415687/cg19999645<br>/cg22562674/cg2753<br>2847            | 0.296011892 | 0.399459499 | 0.522280373 | 0.226268481  | 3.81E-08    | 2.74E-07    |
| TSS1500 | GLB1L3  | 11 | 134145979/134145<br>889/134145490/134 4<br>145940                                                 | 4 | cg13491690/cg23170<br>850/cg23808004/cg2<br>5999867                                                     | 0.137599071 | 0.192298363 | 0.297967898 | 0.160368828  | 0.000977703 | 0.002340221 |
| TSS1500 | GLDC    | 9  | 6646386                                                                                           | 1 | cg14538238                                                                                              | 0.245986995 | 0.330779944 | 0.432050665 | 0.18606367   | 0.004265028 | 0.00898464  |
| TSS1500 | GLI2    | 2  | 121554307/121554<br>418                                                                           | 2 | cg10520924/cg27120<br>020                                                                               | 0.7774622   | 0.697636383 | 0.577560223 | -0.199901977 | 2.83E-09    | 3.17E-08    |
| TSS1500 | GLRA3   | 4  | 175750666/175751<br>001/175750792/175 4<br>750802                                                 | 4 | cg15104299/cg16592<br>586/cg19968631/cg2<br>2045888                                                     | 0.188807151 | 0.24187582  | 0.373663576 | 0.184856425  | 5.60E-09    | 5.50E-08    |
| TSS1500 | GLRB    | 4  | 157997173/157997<br>189/157997167/157<br>997086/157996959/ 8<br>157997079/157997<br>064/157997178 | 8 | cg04006722/cg05263<br>495/cg06436905/cg0<br>7084358/cg10120856<br>/cg18344745/cg2456<br>8468/cg25911468 | 0.375425395 | 0.400772235 | 0.531676319 | 0.156250924  | 6.85E-06    | 2.62E-05    |
| TSS1500 | GLRX    | 5  | 95159639/9515961<br>4/95159423/951593 4<br>65                                                     | 4 | cg03852144/cg10949<br>007/cg16677191/cg2<br>2689909                                                     | 0.288228939 | 0.162668511 | 0.117161139 | -0.1710678   | 1.30E-09    | 1.69E-08    |
| TSS1500 | GNAO1   | 16 | 56224782/5622450<br>4/56224901/562246 5<br>27/56224793                                            | 5 | cg00866976/cg04156<br>464/cg06728579/cg0<br>8613597/cg10273340                                          | 0.121886658 | 0.203293909 | 0.404969255 | 0.283082597  | 1.18E-07    | 7.36E-07    |
| TSS1500 | GNAT1   | 3  | 50227735/5022822<br>0/50228212                                                                    | 3 | cg00373148/cg01042<br>877/cg22241014                                                                    | 0.64737922  | 0.561689794 | 0.430273139 | -0.217106081 | 3.17E-10    | 5.70E-09    |
| TSS1500 | GNAT2   | 1  | 110156682/110156<br>820/110156110                                                                 | 3 | cg02492799/cg12234<br>947/cg22941294                                                                    | 0.783376293 | 0.694172715 | 0.625757667 | -0.157618627 | 2.54E-08    | 1.95E-07    |
| TSS1500 | GNPNAT1 | 14 | 53258644/5325859<br>0/53258684/532586 4<br>01                                                     | 4 | cg02247430/cg11045<br>303/cg16764848/cg2<br>0395072                                                     | 0.444977933 | 0.367989403 | 0.293520493 | -0.151457439 | 1.26E-09    | 1.65E-08    |

|         |         |    |                                                      |   |                                                                |             |             |             |              |            |             |
|---------|---------|----|------------------------------------------------------|---|----------------------------------------------------------------|-------------|-------------|-------------|--------------|------------|-------------|
| TSS1500 | GNRHR   | 4  | 68622534/6862252<br>0/68622191                       | 3 | cg08916385/cg18003<br>698/cg27219973                           | 0.60504517  | 0.456784639 | 0.380771895 | -0.224273275 | 2.81E-12   | 2.70E-10    |
| TSS1500 | GNS     | 12 | 65153982/6515345<br>9/65153561/651534<br>76          | 4 | cg00626466/cg02083<br>989/cg07951810/cg1<br>5956273            | 0.63106359  | 0.4841896   | 0.360686759 | -0.270376831 | 7.29E-10   | 1.07E-08    |
| TSS1500 | GOLGA8B | 15 | 34876295/3487634<br>7/34876471/348763<br>96/34876283 | 5 | cg01471153/cg02700<br>714/cg02966722/cg0<br>9670701/cg09684485 | 0.110715298 | 0.201695694 | 0.274303233 | 0.163587935  | 0.00030929 | 0.000820881 |
| TSS1500 | GON4L   | 1  | 155827556/155828<br>357/155828174                    | 3 | cg00504075/cg12738<br>981/cg17930201                           | 0.503600785 | 0.410822348 | 0.342831706 | -0.160769079 | 1.31E-10   | 2.95E-09    |
| TSS1500 | GP1BB   | 22 | 19710091/1970975<br>5/19710163/197096<br>96          | 4 | cg03970899/cg05726<br>109/cg12899065/cg2<br>0193802            | 0.582109428 | 0.498699031 | 0.425653265 | -0.156456163 | 3.84E-10   | 6.56E-09    |
| TSS1500 | GPA33   | 1  | 167060565/167060<br>788                              | 2 | cg01607187/cg24987<br>706                                      | 0.794774235 | 0.726788717 | 0.638605507 | -0.156168728 | 2.74E-10   | 5.10E-09    |
| TSS1500 | GPHB5   | 14 | 63785334/6378552<br>3/63785287                       | 3 | cg02527030/cg02938<br>807/cg04236382                           | 0.56578788  | 0.463877017 | 0.367342977 | -0.198444903 | 5.99E-10   | 9.14E-09    |
| TSS1500 | GPHN    | 14 | 66972956/6697336<br>1                                | 2 | cg15824062/cg23677<br>229                                      | 0.86137562  | 0.803309378 | 0.675601732 | -0.185773888 | 1.77E-05   | 6.19E-05    |
| TSS1500 | GPM6A   | 4  | 176924985/176735<br>244                              | 2 | cg05224524/cg17304<br>111                                      | 0.693465735 | 0.553623328 | 0.433092857 | -0.260372878 | 2.65E-09   | 3.01E-08    |
| TSS1500 | GPR133  | 12 | 131437035/131437<br>802/131438016                    | 3 | cg02075142/cg08943<br>696/cg24033224                           | 0.80877667  | 0.733452628 | 0.625779864 | -0.182996806 | 5.31E-05   | 0.000166237 |
| TSS1500 | GPR141  | 7  | 37779122                                             | 1 | cg24946941                                                     | 0.804884015 | 0.7372793   | 0.643373055 | -0.16151096  | 4.68E-05   | 0.000148757 |
| TSS1500 | GPR162  | 12 | 6929671/6929591/6<br>930624/6930084                  | 4 | cg03795245/cg08349<br>804/cg17805404/cg2<br>0093940            | 0.648837393 | 0.564521161 | 0.480883961 | -0.167953433 | 2.76E-08   | 2.09E-07    |
| TSS1500 | GPR17   | 2  | 128402294/128403<br>084/128403133/128<br>402415      | 4 | cg11067412/cg19724<br>910/cg23528975/cg2<br>4131343            | 0.65779554  | 0.553877983 | 0.464734895 | -0.193060645 | 1.07E-09   | 1.46E-08    |
| TSS1500 | GPR26   | 10 | 125425583/125425<br>262/125425625                    | 3 | cg02721665/cg07036<br>530/cg16783279                           | 0.37946213  | 0.451469135 | 0.587918635 | 0.208456505  | 4.45E-08   | 3.15E-07    |
| TSS1500 | GPR27   | 3  | 71802533/7180260<br>8/71802420/718025<br>94          | 4 | cg03604840/cg04408<br>595/cg22631938/cg2<br>2823146            | 0.20313981  | 0.221876609 | 0.396107026 | 0.192967216  | 6.53E-06   | 2.51E-05    |
| TSS1500 | GPR44   | 11 | 60624162/6062378<br>2/60623918                       | 3 | cg13109410/cg19254<br>163/cg25087851                           | 0.608081928 | 0.547852891 | 0.455812508 | -0.152269421 | 1.36E-11   | 6.44E-10    |
| TSS1500 | GPR62   | 3  | 51988425                                             | 1 | cg19238325                                                     | 0.63293058  | 0.540711567 | 0.479703623 | -0.153226957 | 1.24E-05   | 4.48E-05    |

|         |         |    |                                                                                                                                                                                                                             |    |                                                                                                                                                                                                                                               |             |             |             |              |          |             |
|---------|---------|----|-----------------------------------------------------------------------------------------------------------------------------------------------------------------------------------------------------------------------------|----|-----------------------------------------------------------------------------------------------------------------------------------------------------------------------------------------------------------------------------------------------|-------------|-------------|-------------|--------------|----------|-------------|
| TSS1500 | GPR81   | 12 | 123215553/123215<br>471/123215524/123<br>215684                                                                                                                                                                             | 4  | cg13702536/cg19328<br>828/cg23505823/cg2<br>6643476                                                                                                                                                                                           | 0.625405677 | 0.558253356 | 0.4302671   | -0.195138577 | 2.39E-06 | 1.03E-05    |
| TSS1500 | GPR83   | 11 | 94135006/9413482<br>7/94135029                                                                                                                                                                                              | 3  | cg12226717/cg19851<br>909/cg26738987                                                                                                                                                                                                          | 0.473334752 | 0.557997452 | 0.673637398 | 0.200302647  | 7.37E-07 | 3.66E-06    |
| TSS1500 | GPT     | 8  | 145728388/145729<br>149/145728507/145<br>728587/145728490/<br>145728138/145728<br>526/145728209/145<br>729126/145729106/<br>145728438/145728<br>203/145729135/145<br>728630/145729196/<br>145728285/145728<br>543/145728501 | 18 | cg00280345/cg01919<br>204/cg05241828/cg0<br>6110286/cg07658280<br>/cg09265054/cg0995<br>7864/cg14476479/cg<br>15685971/cg1598352<br>0/cg16582889/cg165<br>87265/cg18555289/c<br>g19352605/cg205457<br>76/cg23793500/cg25<br>600446/cg26572973 | 0.53467719  | 0.449175899 | 0.378689126 | -0.155988064 | 6.88E-11 | 1.86E-09    |
| TSS1500 | GPX5    | 6  | 28493500/2849301<br>9/28493113/284932<br>84/28493312                                                                                                                                                                        | 5  | cg11562153/cg13679<br>778/cg26313247/cg2<br>6398793/cg27123522                                                                                                                                                                                | 0.627405838 | 0.553652199 | 0.471714878 | -0.15569096  | 1.67E-10 | 3.50E-09    |
| TSS1500 | GRAMD1B | 11 | 123396039/123396<br>299/123396133                                                                                                                                                                                           | 3  | cg03627771/cg26393<br>964/cg26617787                                                                                                                                                                                                          | 0.539845423 | 0.445901998 | 0.377796439 | -0.162048984 | 4.54E-11 | 1.44E-09    |
| TSS1500 | GREB1   | 2  | 11679605/1167392<br>8/11679872/116798<br>45/11682017/11681<br>405/11672761/1168<br>1908/11673360                                                                                                                            | 9  | cg01384111/cg10612<br>997/cg13808071/cg1<br>5707428/cg18584561<br>/cg19749001/cg2564<br>9765/cg25785303/cg<br>25793243                                                                                                                        | 0.593966826 | 0.477820935 | 0.409346799 | -0.184620027 | 1.13E-11 | 5.66E-10    |
| TSS1500 | GRIA1   | 5  | 152869009/152869<br>431/152869882/152<br>869193                                                                                                                                                                             | 4  | cg07633435/cg16281<br>600/cg17987968/cg2<br>1146273                                                                                                                                                                                           | 0.418881148 | 0.340422306 | 0.255120393 | -0.163760755 | 5.50E-12 | 3.91E-10    |
| TSS1500 | GRIA2   | 4  | 158141570/158141<br>076/158141542/158<br>141526/158141492/<br>158141449                                                                                                                                                     | 6  | cg00699993/cg02757<br>172/cg10410142/cg1<br>3914083/cg15425280<br>/cg23734973                                                                                                                                                                 | 0.409073504 | 0.484409099 | 0.627229025 | 0.218155521  | 3.89E-11 | 1.31E-09    |
| TSS1500 | GRID1   | 10 | 88126853/8812757<br>2/88127188/881273<br>63                                                                                                                                                                                 | 4  | cg01229798/cg05349<br>542/cg09168604/cg1<br>9014941                                                                                                                                                                                           | 0.216951013 | 0.277379755 | 0.41945845  | 0.202507436  | 3.47E-05 | 0.000113272 |

|         |        |    |                                                                                                                        |    |                                                                                                                                                  |             |             |             |              |          |          |
|---------|--------|----|------------------------------------------------------------------------------------------------------------------------|----|--------------------------------------------------------------------------------------------------------------------------------------------------|-------------|-------------|-------------|--------------|----------|----------|
| TSS1500 | GRIK1  | 21 | 31312905/3131264<br>3/31312535                                                                                         | 3  | cg07028661/cg08685<br>096/cg24868359                                                                                                             | 0.275396941 | 0.346484311 | 0.429112839 | 0.153715898  | 4.39E-06 | 1.76E-05 |
| TSS1500 | GRIK3  | 1  | 37500790/3750019<br>5/37500369/375003<br>58/37500441/37500<br>508/37501164                                             | 7  | cg06165395/cg10126<br>715/cg16379885/cg1<br>6599703/cg19206040<br>/cg19727439/cg2467<br>3742                                                     | 0.316014279 | 0.370265047 | 0.484528205 | 0.168513925  | 1.23E-07 | 7.62E-07 |
| TSS1500 | GRIK5  | 19 | 42570406/4257140<br>2/42571339                                                                                         | 3  | cg00553487/cg03100<br>024/cg13510813                                                                                                             | 0.521882803 | 0.408216576 | 0.296266229 | -0.225616575 | 4.06E-11 | 1.34E-09 |
| TSS1500 | GRIN2A | 16 | 10277505/1027637<br>5/10276984/102773<br>17/10276383/10276<br>674/10277254/1027<br>6580/10276799/102<br>76600/10277017 | 11 | cg00036299/cg00287<br>829/cg00518386/cg0<br>1722994/cg06758670<br>/cg07642043/cg0862<br>1611/cg09239744/cg<br>16368442/cg2476497<br>9/cg25047001 | 0.187488334 | 0.294552973 | 0.470548664 | 0.28306033   | 4.85E-09 | 4.93E-08 |
| TSS1500 | GRIN2C | 17 | 72857095/7285735<br>4/72856452/728568<br>25/72857076/72857<br>053/72857430                                             | 7  | cg05410012/cg05848<br>509/cg09169283/cg1<br>3715127/cg19700341<br>/cg21264131/cg2351<br>3814                                                     | 0.163162292 | 0.2084697   | 0.336178929 | 0.173016638  | 6.34E-06 | 2.45E-05 |
| TSS1500 | GRP    | 18 | 56886915/5688719<br>4/56887002/568870<br>30                                                                            | 4  | cg01625242/cg15633<br>664/cg16899265/cg2<br>5260683                                                                                              | 0.270584434 | 0.335783928 | 0.439009534 | 0.1684251    | 1.53E-06 | 6.90E-06 |
| TSS1500 | GRWD1  | 19 | 48947560/4894763<br>1/48947572/489475<br>78/48948005                                                                   | 5  | cg04988514/cg14594<br>362/cg16875863/cg2<br>2242216/cg26362197                                                                                   | 0.337209907 | 0.448778694 | 0.62741754  | 0.290207633  | 3.16E-09 | 3.46E-08 |
| TSS1500 | GRXCR1 | 4  | 42894337/4289498<br>1                                                                                                  | 2  | cg05279772/cg20682<br>222                                                                                                                        | 0.75030223  | 0.683377903 | 0.587615532 | -0.162686698 | 1.73E-07 | 1.04E-06 |
| TSS1500 | GSDMC  | 8  | 130799851                                                                                                              | 1  | cg24243265                                                                                                                                       | 0.78446785  | 0.719909561 | 0.619964818 | -0.164503032 | 1.25E-06 | 5.79E-06 |
| TSS1500 | GSX1   | 13 | 28365587/2836585<br>3/28365638/283664<br>27/28365723/28366<br>498                                                      | 6  | cg11444278/cg11508<br>413/cg11571585/cg1<br>4973588/cg17352540<br>/cg26270746                                                                    | 0.275504668 | 0.336323827 | 0.439153811 | 0.163649143  | 2.33E-07 | 1.34E-06 |
| TSS1500 | GTF2B  | 1  | 89357988/8935790<br>8/89357911/893580<br>43                                                                            | 4  | cg10430205/cg13868<br>361/cg14010405/cg1<br>7811845                                                                                              | 0.551929088 | 0.432387982 | 0.321511108 | -0.23041798  | 4.67E-11 | 1.48E-09 |
| TSS1500 | GUCA1A | 6  | 42121902/4212181<br>1                                                                                                  | 2  | cg11971121/cg24216<br>990                                                                                                                        | 0.462109265 | 0.38630545  | 0.307492391 | -0.154616874 | 1.15E-09 | 1.54E-08 |

|         |          |    |                                                                            |                                                                                              |             |             |             |              |             |             |
|---------|----------|----|----------------------------------------------------------------------------|----------------------------------------------------------------------------------------------|-------------|-------------|-------------|--------------|-------------|-------------|
| TSS1500 | GUCY1A2  | 11 | 106889557/106890<br>150/106890247/106 5<br>890084/106889745                | cg04948524/cg10249<br>705/cg13042926/cg2<br>1958798/cg23573913                               | 0.186021068 | 0.215698291 | 0.338517068 | 0.152496     | 9.77E-06    | 3.60E-05    |
| TSS1500 | GYPA     | 4  | 145062810/145062<br>551                                                    | cg16422931/cg25932<br>299                                                                    | 0.614799865 | 0.558460942 | 0.458109759 | -0.156690106 | 5.64E-07    | 2.89E-06    |
| TSS1500 | GYPB     | 4  | 144941588/144941<br>609                                                    | cg05188963/cg16177<br>314                                                                    | 0.741587975 | 0.664210031 | 0.561034986 | -0.180552989 | 6.07E-10    | 9.23E-09    |
| TSS1500 | H2AFJ    | 12 | 14926909/1492698<br>6/14926572/149263 5<br>17/14926744                     | cg07112131/cg09163<br>005/cg12806797/cg2<br>3368416/cg26127836                               | 0.456277333 | 0.517601821 | 0.616651501 | 0.160374169  | 0.000153301 | 0.000433427 |
| TSS1500 | HAVCR1   | 5  | 156486186/156486<br>422/156486840                                          | cg01485975/cg01551<br>315/cg26432088                                                         | 0.551772    | 0.444726806 | 0.35687703  | -0.19489497  | 6.80E-09    | 6.41E-08    |
| TSS1500 | HBB      | 11 | 5249528/5248566                                                            | cg06233985/cg14544<br>583                                                                    | 0.61646197  | 0.503877603 | 0.403433477 | -0.213028493 | 2.48E-12    | 2.46E-10    |
| TSS1500 | HBBP1    | 11 | 5265215/5265155/5<br>265992                                                | cg01832325/cg20785<br>459/cg26078436                                                         | 0.629606845 | 0.519527303 | 0.451990174 | -0.177616671 | 1.44E-08    | 1.20E-07    |
| TSS1500 | HCK      | 20 | 30639816/3063970<br>5/30639305                                             | cg02311725/cg17326<br>769/cg17508991                                                         | 0.25352192  | 0.377866302 | 0.46868729  | 0.21516537   | 3.55E-05    | 0.000115405 |
| TSS1500 | HDGFL1   | 6  | 22568625/2256827<br>8                                                      | cg20209681/cg21898<br>884                                                                    | 0.593182415 | 0.4328928   | 0.344404064 | -0.248778351 | 4.04E-10    | 6.77E-09    |
| TSS1500 | HEPN1    | 11 | 124788414                                                                  | cg23530543                                                                                   | 0.777910525 | 0.658016239 | 0.490776441 | -0.287134084 | 8.42E-08    | 5.46E-07    |
| TSS1500 | HERC6    | 4  | 89299173/8929931<br>4                                                      | cg08684066/cg24804<br>970                                                                    | 0.828776775 | 0.723952339 | 0.637933505 | -0.19084327  | 4.30E-08    | 3.05E-07    |
| TSS1500 | HHATL    | 3  | 42743794/4274488<br>9/42743921/427437<br>44/42745757/42744<br>301/42745362 | cg00407150/cg08060<br>987/cg08776619/cg1<br>8817801/cg19606364<br>/cg19827650/cg2496<br>2576 | 0.617358187 | 0.528969819 | 0.434289509 | -0.183068678 | 9.54E-11    | 2.36E-09    |
| TSS1500 | HHLA2    | 3  | 108021106/108020<br>451/108020727                                          | cg02059214/cg02124<br>498/cg08817540                                                         | 0.660093073 | 0.545509414 | 0.430773614 | -0.229319459 | 3.98E-07    | 2.14E-06    |
| TSS1500 | HIBADH   | 7  | 27704065/2770343<br>6/27702803                                             | cg01662334/cg11724<br>147/cg22168087                                                         | 0.724416758 | 0.582106253 | 0.520662452 | -0.203754305 | 1.90E-07    | 1.12E-06    |
| TSS1500 | HIGD1B   | 17 | 42924794/4292423<br>1/42923814                                             | cg15460047/cg20127<br>596/cg24417621                                                         | 0.78544294  | 0.683533878 | 0.603909509 | -0.181533431 | 7.10E-06    | 2.70E-05    |
| TSS1500 | HIST1H3J | 6  | 27859811/2785916<br>0                                                      | cg12629515/cg23504<br>411                                                                    | 0.440070303 | 0.362063121 | 0.262609053 | -0.17746125  | 7.24E-07    | 3.60E-06    |



|         |           |    |                                                                                                                                                                                                       |    |                                                                                                                                                                                                                                               |             |             |             |              |          |          |
|---------|-----------|----|-------------------------------------------------------------------------------------------------------------------------------------------------------------------------------------------------------|----|-----------------------------------------------------------------------------------------------------------------------------------------------------------------------------------------------------------------------------------------------|-------------|-------------|-------------|--------------|----------|----------|
| TSS1500 | HIST2H2BF | 1  | 149784851/149784<br>212/149785211/149<br>784571/149399930/<br>149399454/149400<br>292/149399911/149<br>400082/149784776/<br>149400352                                                                 | 11 | cg00428476/cg04888<br>113/cg08636083/cg1<br>2769994/cg13082351<br>/cg14497172/cg1515<br>7455/cg16519842/cg<br>17313031/cg2378259<br>1/cg24437737                                                                                              | 0.267308122 | 0.335265354 | 0.441835125 | 0.174527003  | 5.53E-10 | 8.61E-09 |
| TSS1500 | HIST4H4   | 12 | 14924953/1492493<br>0                                                                                                                                                                                 | 2  | cg08746853/cg13064<br>062                                                                                                                                                                                                                     | 0.548641208 | 0.483775031 | 0.35650017  | -0.192141037 | 2.85E-07 | 1.60E-06 |
| TSS1500 | HK3       | 5  | 176326619/176327<br>783/176326924                                                                                                                                                                     | 3  | cg17809377/cg19791<br>262/cg23912072                                                                                                                                                                                                          | 0.492673845 | 0.429004306 | 0.3098316   | -0.182842245 | 1.22E-11 | 5.98E-10 |
| TSS1500 | HKDC1     | 10 | 70979827/7097981<br>1/70979777                                                                                                                                                                        | 3  | cg05532178/cg11639<br>651/cg23341612                                                                                                                                                                                                          | 0.811678557 | 0.715256174 | 0.537345724 | -0.274332832 | 1.10E-06 | 5.16E-06 |
| TSS1500 | HLA-DOA   | 6  | 32978548/3297823<br>3/32978281/329785<br>93/32978610/32978<br>129/32978516/3297<br>8271/32978775/329<br>78379/32977674/32<br>978196/32978140/3<br>2978053/32977983/<br>32978570/3297770<br>8/32978718 | 18 | cg00988577/cg01715<br>800/cg01720176/cg0<br>2172533/cg03546401<br>/cg04615290/cg0504<br>3389/cg05408403/cg<br>05683739/cg0650403<br>9/cg08147094/cg110<br>76970/cg13132775/c<br>g16914277/cg173139<br>45/cg18278290/cg20<br>024110/cg24476363 | 0.73392532  | 0.657341578 | 0.559822115 | -0.174103204 | 5.40E-14 | 3.40E-11 |
| TSS1500 | HLA-DQB2  | 6  | 32732685/3273237<br>1/32732585/327328<br>06/32732764/32732<br>247                                                                                                                                     | 6  | cg06499030/cg16315<br>262/cg16899306/cg1<br>7043222/cg21566383<br>/cg23743845                                                                                                                                                                 | 0.526920723 | 0.451237178 | 0.322530036 | -0.204390687 | 1.08E-08 | 9.47E-08 |
| TSS1500 | HMHB1     | 5  | 143190384/143191<br>194/143191226                                                                                                                                                                     | 3  | cg12672779/cg14461<br>752/cg15823954                                                                                                                                                                                                          | 0.872872    | 0.77037915  | 0.612053091 | -0.260818909 | 6.82E-09 | 6.42E-08 |
| TSS1500 | HMP19     | 5  | 173472066/173472<br>097                                                                                                                                                                               | 2  | cg19414040/cg25494<br>605                                                                                                                                                                                                                     | 0.620565258 | 0.529324583 | 0.467093693 | -0.153471564 | 2.06E-06 | 9.04E-06 |
| TSS1500 | HOOK2     | 19 | 12887524/1288698<br>6/12886980/128869<br>82                                                                                                                                                           | 4  | cg00072407/cg07484<br>849/cg10810394/cg1<br>5683940                                                                                                                                                                                           | 0.63322083  | 0.543957313 | 0.480309717 | -0.152911113 | 2.23E-11 | 8.79E-10 |
| TSS1500 | HORMAD2   | 22 | 30476206/3047609<br>8/30476089                                                                                                                                                                        | 3  | cg04046669/cg16686<br>158/cg21890667                                                                                                                                                                                                          | 0.61742774  | 0.710920494 | 0.775279118 | 0.157851378  | 3.53E-10 | 6.18E-09 |

|         |          |    |                                                                            |                                                                                              |             |             |             |              |             |             |
|---------|----------|----|----------------------------------------------------------------------------|----------------------------------------------------------------------------------------------|-------------|-------------|-------------|--------------|-------------|-------------|
| TSS1500 | HOXC10   | 12 | 54378500/5437873<br>6/54377550/543774 4<br>57                              | cg03833604/cg04710<br>764/cg16898193/cg2<br>0403938                                          | 0.266000433 | 0.330528956 | 0.429185785 | 0.163185352  | 0.000640479 | 0.001592719 |
| TSS1500 | HOXC13   | 12 | 54332222/5433189<br>2/54332026/543322 5<br>09/54332181                     | cg01577751/cg04727<br>865/cg17085352/cg2<br>0587394/cg22830707                               | 0.422407746 | 0.480509992 | 0.582601793 | 0.160194047  | 1.37E-10    | 3.05E-09    |
| TSS1500 | HPVC1    | 7  | 54271282/5427115<br>2                                                      | cg21336434/cg23860<br>325                                                                    | 0.609088925 | 0.465808281 | 0.326292093 | -0.282796832 | 1.12E-09    | 1.51E-08    |
| TSS1500 | HS3ST2   | 16 | 22824489/2282487<br>7/22825100/228250<br>46/22825158/22825<br>282/22825621 | cg03033688/cg03132<br>773/cg03713642/cg0<br>9191731/cg10370599<br>/cg20023231/cg2740<br>3265 | 0.289570293 | 0.322859115 | 0.446038792 | 0.156468499  | 3.54E-05    | 0.000115308 |
| TSS1500 | HS3ST3A1 | 17 | 13506186/1350575<br>1/13505558/135062<br>30/13505590/13506<br>284/13505799 | cg00203913/cg09463<br>656/cg12503102/cg1<br>5214448/cg18236079<br>/cg19298225/cg2437<br>5938 | 0.328428358 | 0.422663599 | 0.548477802 | 0.220049445  | 4.64E-07    | 2.44E-06    |
| TSS1500 | HS3ST5   | 6  | 114385144/114384<br>871/114384629                                          | cg06694119/cg18192<br>491/cg23968650                                                         | 0.557370025 | 0.396287689 | 0.334053877 | -0.223316148 | 5.49E-10    | 8.55E-09    |
| TSS1500 | HSD17B14 | 19 | 49340489/4934057<br>4/49340765/493405 4<br>93                              | cg04777726/cg16594<br>139/cg19024700/cg2<br>6267310                                          | 0.376007511 | 0.484255928 | 0.568531901 | 0.19252439   | 1.14E-06    | 5.34E-06    |
| TSS1500 | HTR1A    | 5  | 63257885/6325781<br>3/63257847/632578<br>67/63257941/63257<br>873/63257753 | cg07839533/cg08259<br>925/cg09698471/cg1<br>1615755/cg13666507<br>/cg15092168/cg1628<br>0141 | 0.338136579 | 0.413936406 | 0.581700744 | 0.243564165  | 4.67E-10    | 7.57E-09    |
| TSS1500 | HTR1E    | 6  | 87646738/8764646<br>2/87646740/876468 4<br>04                              | cg02508664/cg15888<br>097/cg20991421/cg2<br>2442841                                          | 0.321823975 | 0.230113461 | 0.171712014 | -0.150111961 | 5.23E-12    | 3.76E-10    |
| TSS1500 | HTR3D    | 3  | 183749212/183749<br>414/183750284/183 4<br>749227                          | cg00576550/cg04200<br>192/cg10685228/cg1<br>4483391                                          | 0.543917035 | 0.470620147 | 0.380217845 | -0.16369919  | 1.21E-09    | 1.60E-08    |
| TSS1500 | HYAL4    | 7  | 123484985/123484<br>534/123484898                                          | cg00422716/cg03085<br>932/cg15560337                                                         | 0.562269267 | 0.474617861 | 0.40113375  | -0.161135517 | 3.52E-11    | 1.22E-09    |
| TSS1500 | IBSP     | 4  | 88720194                                                                   | cg08422456                                                                                   | 0.81885805  | 0.748870656 | 0.657580914 | -0.161277136 | 2.09E-05    | 7.16E-05    |
| TSS1500 | IDO2     | 8  | 39792086/3979122<br>4/39791430                                             | cg11363097/cg16957<br>569/cg17533575                                                         | 0.663849933 | 0.549809731 | 0.443291468 | -0.220558465 | 3.24E-10    | 5.78E-09    |
| TSS1500 | IER3IP1  | 18 | 44703596                                                                   | cg12128262                                                                                   | 0.831279815 | 0.776058533 | 0.650141227 | -0.181138588 | 2.87E-05    | 9.56E-05    |

|         |        |    |                                                                                                                                                                                                                                                                                                                                           |    |                                                                                                                                                                                                                                                                                                                                                                                                                   |             |             |             |              |             |             |          |
|---------|--------|----|-------------------------------------------------------------------------------------------------------------------------------------------------------------------------------------------------------------------------------------------------------------------------------------------------------------------------------------------|----|-------------------------------------------------------------------------------------------------------------------------------------------------------------------------------------------------------------------------------------------------------------------------------------------------------------------------------------------------------------------------------------------------------------------|-------------|-------------|-------------|--------------|-------------|-------------|----------|
| TSS1500 | IFT52  | 20 | 42218758/4221922<br>3                                                                                                                                                                                                                                                                                                                     | 2  | cg03539340/cg22031<br>417                                                                                                                                                                                                                                                                                                                                                                                         | 0.44370789  | 0.327934328 | 0.256021827 | -0.187686063 | 1.02E-10    | 2.49E-09    |          |
| TSS1500 | IGFBP3 | 7  | 45961473/4596145<br>5/45961524/459611<br>02/45961849/45961<br>311/45962236/4596<br>1346/45961289/459<br>61778/45961126/45<br>962052/45961469/4<br>5961074/45961943/<br>45961865/4596179<br>4/45961874/459621<br>85/45961089/45961<br>401/45962090/4596<br>1960/45961078/459<br>61508/45961419/45<br>961537/45962054/4<br>5961772/45961569 | 30 | cg02120774/cg03776<br>080/cg04690927/cg0<br>4796162/cg05083496<br>/cg07910986/cg0854<br>1297/cg08831744/cg<br>09619271/cg1009465<br>1/cg10677697/cg117<br>53867/cg12244052/c<br>g14228300/cg152087<br>57/cg16447589/cg16<br>460681/cg19536059/<br>cg20850023/cg21268<br>650/cg22083798/cg2<br>2403266/cg22800581<br>/cg23193639/cg2345<br>5440/cg24381682/cg<br>24772240/cg2490109<br>8/cg24942272/cg264<br>34048 |             | 0.258169452 | 0.353855144 | 0.458315967  | 0.200146515 | 1.42E-07    | 8.68E-07 |
| TSS1500 | IGFL4  | 19 | 46544662/4654560<br>5/46544711/465448<br>02                                                                                                                                                                                                                                                                                               | 4  | cg13095627/cg15458<br>254/cg17720013/cg2<br>5574111                                                                                                                                                                                                                                                                                                                                                               | 0.463024185 | 0.35958294  | 0.27607766  | -0.186946525 | 2.22E-11    | 8.76E-10    |          |
| TSS1500 | IGJ    | 4  | 71533675                                                                                                                                                                                                                                                                                                                                  | 1  | cg17075352                                                                                                                                                                                                                                                                                                                                                                                                        | 0.548423785 | 0.494963422 | 0.3914145   | -0.157009285 | 1.31E-05    | 4.72E-05    |          |
| TSS1500 | IGLON5 | 19 | 51814765/5181478<br>2                                                                                                                                                                                                                                                                                                                     | 2  | cg22489583/cg25728<br>174                                                                                                                                                                                                                                                                                                                                                                                         | 0.066697245 | 0.071265356 | 0.282444154 | 0.21574691   | 0.000556643 | 0.001403369 |          |
| TSS1500 | IKZF1  | 7  | 50343298/5034388<br>3/50343131/503433<br>61/50343869                                                                                                                                                                                                                                                                                      | 5  | cg01139861/cg07589<br>773/cg14216940/cg1<br>6697214/cg18607529                                                                                                                                                                                                                                                                                                                                                    | 0.247046594 | 0.35052237  | 0.447245417 | 0.200198823  | 3.09E-08    | 2.31E-07    |          |
| TSS1500 | IL17A  | 6  | 52050133/5205059<br>7                                                                                                                                                                                                                                                                                                                     | 2  | cg09582880/cg11924<br>517                                                                                                                                                                                                                                                                                                                                                                                         | 0.67080109  | 0.520380394 | 0.348856723 | -0.321944367 | 5.51E-11    | 1.62E-09    |          |
| TSS1500 | IL18   | 11 | 112035679/112035<br>945/112035175                                                                                                                                                                                                                                                                                                         | 3  | cg04100971/cg05687<br>149/cg09122223                                                                                                                                                                                                                                                                                                                                                                              | 0.511182303 | 0.39276607  | 0.322028429 | -0.189153875 | 5.64E-10    | 8.74E-09    |          |
| TSS1500 | IL1RL1 | 2  | 102953421/102927<br>488/102927397/102<br>927278/102952285/<br>102952419                                                                                                                                                                                                                                                                   | 6  | cg01254707/cg11916<br>609/cg16386158/cg1<br>7738684/cg19795292<br>/cg25869196                                                                                                                                                                                                                                                                                                                                     | 0.762629115 | 0.686094569 | 0.610272636 | -0.152356479 | 7.01E-07    | 3.51E-06    |          |
| TSS1500 | IL22   | 12 | 68647498/6864759<br>0                                                                                                                                                                                                                                                                                                                     | 2  | cg13195526/cg27518<br>047                                                                                                                                                                                                                                                                                                                                                                                         | 0.66151086  | 0.570971714 | 0.507683802 | -0.153827058 | 7.53E-09    | 6.97E-08    |          |

|         |          |    |                                                                                                             |    |                                                                                                                                                  |             |             |             |              |          |          |
|---------|----------|----|-------------------------------------------------------------------------------------------------------------|----|--------------------------------------------------------------------------------------------------------------------------------------------------|-------------|-------------|-------------|--------------|----------|----------|
| TSS1500 | IL22RA1  | 1  | 24470205/2447064<br>7/24470527/244702<br>28                                                                 | 4  | cg02072322/cg08880<br>327/cg11576349/cg2<br>6405802                                                                                              | 0.630749995 | 0.5591269   | 0.479367123 | -0.151382872 | 1.58E-09 | 1.98E-08 |
| TSS1500 | IL25     | 14 | 23841754/2384083<br>7/23841104                                                                              | 3  | cg14366598/cg16025<br>120/cg23619217                                                                                                             | 0.51775648  | 0.386178833 | 0.242359564 | -0.275396916 | 3.98E-11 | 1.32E-09 |
| TSS1500 | IL26     | 12 | 68620926/6862104<br>7/68620370                                                                              | 3  | cg08338368/cg24700<br>219/cg26871735                                                                                                             | 0.681791252 | 0.60146402  | 0.502473458 | -0.179317794 | 4.25E-09 | 4.41E-08 |
| TSS1500 | IL28B    | 19 | 39736699/3973695<br>6/39736690                                                                              | 3  | cg03346025/cg11270<br>633/cg11781854                                                                                                             | 0.692607653 | 0.59424287  | 0.468001588 | -0.224606065 | 1.26E-09 | 1.65E-08 |
| TSS1500 | INA      | 10 | 105036611/105036<br>701/105036645                                                                           | 3  | cg18673954/cg21384<br>402/cg23642747                                                                                                             | 0.276782288 | 0.405315217 | 0.614194856 | 0.337412569  | 2.11E-07 | 1.23E-06 |
| TSS1500 | INADL    | 1  | 62207325/6220745<br>9/62207888                                                                              | 3  | cg03605365/cg04914<br>562/cg12128740                                                                                                             | 0.481722762 | 0.366462233 | 0.296634845 | -0.185087916 | 5.48E-11 | 1.62E-09 |
| TSS1500 | INHBA    | 7  | 41742993/4174300<br>1/41743606                                                                              | 3  | cg14527389/cg16415<br>646/cg19535073                                                                                                             | 0.587903653 | 0.509307967 | 0.420310994 | -0.167592659 | 3.85E-10 | 6.57E-09 |
| TSS1500 | INS      | 11 | 2182644/2183434/2<br>183864/2182795/21<br>82783/2183505/218<br>3832/2183708/2182<br>672/2183420/21838<br>24 | 11 | cg03366382/cg09864<br>961/cg10732560/cg1<br>1208229/cg11322849<br>/cg16711450/cg1809<br>8639/cg23390871/cg<br>24338752/cg2560188<br>6/cg25969082 | 0.689767896 | 0.612410613 | 0.513122089 | -0.176645807 | 7.49E-11 | 1.97E-09 |
| TSS1500 | INS-IGF2 | 11 | 2182644/2183434/2<br>183864/2182795/21<br>82783/2183505/218<br>3832/2183708/2182<br>672/2183420/21838<br>24 | 11 | cg03366382/cg09864<br>961/cg10732560/cg1<br>1208229/cg11322849<br>/cg16711450/cg1809<br>8639/cg23390871/cg<br>24338752/cg2560188<br>6/cg25969082 | 0.689767896 | 0.612410613 | 0.513122089 | -0.176645807 | 7.49E-11 | 1.97E-09 |
| TSS1500 | IPW      | 15 | 25360934/2536043<br>6                                                                                       | 2  | cg11811341/cg16217<br>553                                                                                                                        | 0.670196175 | 0.596967167 | 0.481156432 | -0.189039743 | 6.05E-07 | 3.08E-06 |
| TSS1500 | IQCJ     | 3  | 158786187/158786<br>193/158786242                                                                           | 3  | cg02325869/cg15736<br>726/cg26659665                                                                                                             | 0.784742753 | 0.739937919 | 0.631615188 | -0.153127565 | 3.84E-06 | 1.57E-05 |
| TSS1500 | IRF4     | 6  | 391189/391208/391<br>114/391441                                                                             | 4  | cg01108118/cg10379<br>890/cg25140370/cg2<br>6433102                                                                                              | 0.159531561 | 0.300096832 | 0.450682769 | 0.291151208  | 3.32E-08 | 2.45E-07 |

|         |        |    |                                                                                                                                                                                                                                          |    |                                                                                                                                                                                                                                                                                        |             |             |             |              |             |             |
|---------|--------|----|------------------------------------------------------------------------------------------------------------------------------------------------------------------------------------------------------------------------------------------|----|----------------------------------------------------------------------------------------------------------------------------------------------------------------------------------------------------------------------------------------------------------------------------------------|-------------|-------------|-------------|--------------|-------------|-------------|
| TSS1500 | IRX1   | 5  | 3594679/3595728/3<br>595907/3595106                                                                                                                                                                                                      | 4  | cg01790920/cg05534<br>710/cg06689918/cg0<br>7903370                                                                                                                                                                                                                                    | 0.257273828 | 0.338832611 | 0.4921754   | 0.234901573  | 3.31E-11    | 1.17E-09    |
| TSS1500 | IRX4   | 5  | 1883413/1883514/1<br>884212/1884365/18<br>83940/1883954/188<br>3214                                                                                                                                                                      | 7  | cg00243313/cg00264<br>591/cg05941108/cg1<br>4823763/cg18009496<br>/cg23121993/cg2487<br>6960                                                                                                                                                                                           | 0.254729214 | 0.364092219 | 0.533084286 | 0.278355072  | 1.46E-06    | 6.66E-06    |
| TSS1500 | IRX6   | 16 | 55357253/5535777<br>6/55357842/553580<br>72                                                                                                                                                                                              | 4  | cg02859129/cg04622<br>777/cg08295543/cg0<br>9659661                                                                                                                                                                                                                                    | 0.237643127 | 0.322108204 | 0.43116555  | 0.193522423  | 1.84E-06    | 8.15E-06    |
| TSS1500 | ISLR2  | 15 | 74422275/7442153<br>5/74420796/744219<br>35/74420890/74421<br>635/74422330/7442<br>1523/74422528/744<br>21857/74421739/74<br>421584/74420511/7<br>4421848/74420307/<br>74421887/7442065<br>7/74422282/744219<br>18/74421531/74421<br>909 | 21 | cg00550503/cg00781<br>110/cg01568668/cg0<br>2709205/cg04138492<br>/cg04920649/cg0550<br>5745/cg05547902/cg<br>05923854/cg0604167<br>7/cg07216112/cg079<br>17269/cg08036502/c<br>g08703540/cg119776<br>93/cg12017911/cg21<br>322819/cg23152885/<br>cg25705558/cg25828<br>462/cg27200833 | 0.225178705 | 0.26188545  | 0.386005899 | 0.160827194  | 2.28E-06    | 9.88E-06    |
| TSS1500 | ITGBL1 | 13 | 102104573/102104<br>707/102103930                                                                                                                                                                                                        | 3  | cg02119955/cg05138<br>203/cg16852483                                                                                                                                                                                                                                                   | 0.682733358 | 0.596603048 | 0.476781662 | -0.205951696 | 8.23E-12    | 4.90E-10    |
| TSS1500 | ITIH4  | 3  | 52865917/5286559<br>2/52865637                                                                                                                                                                                                           | 3  | cg06204229/cg22534<br>898/cg27125504                                                                                                                                                                                                                                                   | 0.55623455  | 0.4652603   | 0.371328418 | -0.184906132 | 4.47E-12    | 3.50E-10    |
| TSS1500 | IVL    | 1  | 152879586/152880<br>324/152880108                                                                                                                                                                                                        | 3  | cg02889647/cg15059<br>851/cg25082710                                                                                                                                                                                                                                                   | 0.557640102 | 0.435763476 | 0.330629729 | -0.227010373 | 1.04E-10    | 2.50E-09    |
| TSS1500 | IZUMO1 | 19 | 49250439/4925045<br>2/49250561                                                                                                                                                                                                           | 3  | cg03609666/cg08536<br>841/cg15146515                                                                                                                                                                                                                                                   | 0.301826057 | 0.327932451 | 0.466086427 | 0.164260371  | 0.000189135 | 0.000524794 |
| TSS1500 | KAT2A  | 17 | 40274811/4027467<br>0/40273815/402747<br>40/40274728/40274<br>703/40274524/4027<br>4722                                                                                                                                                  | 8  | cg00582337/cg01501<br>896/cg04278905/cg0<br>7168142/cg08880849<br>/cg16208084/cg2691<br>6966/cg26934993                                                                                                                                                                                | 0.586550897 | 0.501542763 | 0.433139376 | -0.153411521 | 1.76E-09    | 2.14E-08    |

|         |         |    |                                                                                  |   |                                                                                                    |             |             |             |              |          |          |
|---------|---------|----|----------------------------------------------------------------------------------|---|----------------------------------------------------------------------------------------------------|-------------|-------------|-------------|--------------|----------|----------|
| TSS1500 | KCNA1   | 12 | 5018338/5018513/5018715/5018815/5018229/5018805/5018798                          | 7 | cg00838874/cg04891086/cg06652199/cg11388325/cg15930596/cg19651132/cg20392607                       | 0.183212817 | 0.279456873 | 0.503915957 | 0.32070314   | 6.22E-11 | 1.73E-09 |
| TSS1500 | KCNA4   | 11 | 30038788/30039113/30039004/30038797/30039031/30038692                            | 6 | cg03506489/cg11735997/cg12122597/cg13161658/cg14161359/cg22685409                                  | 0.382359359 | 0.468829547 | 0.610019638 | 0.227660279  | 1.86E-08 | 1.49E-07 |
| TSS1500 | KCNA7   | 19 | 49577206/49577162/49577303/49576955                                              | 4 | cg03564727/cg07992308/cg16693612/cg27435138                                                        | 0.5416406   | 0.442799737 | 0.382365655 | -0.159274945 | 1.84E-07 | 1.09E-06 |
| TSS1500 | KCNH7   | 2  | 163696187/163696000/163695776/163695793/163695965/163695882                      | 6 | cg07150045/cg09454925/cg12302070/cg19965810/cg21302951/cg25668368                                  | 0.367267259 | 0.432803777 | 0.538715473 | 0.171448214  | 1.10E-09 | 1.48E-08 |
| TSS1500 | KCNIP1  | 5  | 169930841/169930535/169780480/169929560/169780299/169780320                      | 6 | cg11956545/cg12833011/cg16335868/cg23479949/cg24615189/cg26947766                                  | 0.386437808 | 0.464275517 | 0.543464659 | 0.157026852  | 2.33E-10 | 4.51E-09 |
| TSS1500 | KCNK12  | 2  | 47797953/47798679/47798477/47797963/47798396                                     | 5 | cg01826863/cg04934807/cg04981611/cg13913015/cg27320127                                             | 0.092764989 | 0.153461384 | 0.33881546  | 0.24605047   | 1.97E-05 | 6.80E-05 |
| TSS1500 | KCNK16  | 6  | 39290711/39290877/39290715                                                       | 3 | cg01429075/cg01669948/cg24018148                                                                   | 0.59993263  | 0.484186694 | 0.381925432 | -0.218007198 | 1.35E-11 | 6.42E-10 |
| TSS1500 | KCNMB1  | 5  | 169817797/169817247/169816960                                                    | 3 | cg07802909/cg17425484/cg24990238                                                                   | 0.478795875 | 0.348029622 | 0.264546905 | -0.21424897  | 1.19E-11 | 5.86E-10 |
| TSS1500 | KCNQ5   | 6  | 73330358/73330297/73330208/73331191/73330112/73331114/73331290/73331238/73330106 | 9 | cg03020545/cg03922126/cg04290119/cg04377145/cg05350268/cg05447008/cg09303936/cg11008243/cg15120732 | 0.155452546 | 0.241257703 | 0.333359766 | 0.177907219  | 1.13E-07 | 7.07E-07 |
| TSS1500 | KDEL2   | 7  | 6524998/6525025                                                                  | 2 | cg08622675/cg27221338                                                                              | 0.756145083 | 0.619762497 | 0.491512    | -0.264633083 | 1.00E-10 | 2.45E-09 |
| TSS1500 | KHDC1L  | 6  | 73935584/73935676                                                                | 2 | cg00732807/cg10190334                                                                              | 0.710557635 | 0.553520339 | 0.403592364 | -0.306965271 | 2.54E-14 | 2.33E-11 |
| TSS1500 | KHDRBS2 | 6  | 62996702/62996697/62996627/62996664                                              | 4 | cg00578220/cg02217159/cg04398581/cg23926793                                                        | 0.212554239 | 0.312072944 | 0.510115303 | 0.297561064  | 9.37E-07 | 4.51E-06 |

|         |          |    |                                                           |   |                                                                |             |             |             |              |             |             |
|---------|----------|----|-----------------------------------------------------------|---|----------------------------------------------------------------|-------------|-------------|-------------|--------------|-------------|-------------|
| TSS1500 | KIAA0408 | 6  | 127781063/127781<br>873/127781298                         | 3 | cg05798147/cg06003<br>184/cg13662246                           | 0.737810268 | 0.639857235 | 0.555318829 | -0.18249144  | 6.14E-10    | 9.33E-09    |
| TSS1500 | KIAA1024 | 15 | 79724044/7972399<br>7779724519/797245<br>17/79723655      | 5 | cg05390694/cg05419<br>425/cg05804863/cg1<br>1821817/cg12284802 | 0.154960982 | 0.2105245   | 0.305212052 | 0.15025107   | 0.000226655 | 0.000617364 |
| TSS1500 | KIAA1199 | 15 | 81070337/8107085<br>1/81071273                            | 3 | cg08083041/cg20828<br>084/cg24159335                           | 0.450242945 | 0.367014461 | 0.289188219 | -0.161054726 | 1.10E-11    | 5.59E-10    |
| TSS1500 | KIAA1211 | 4  | 57035957/5703594<br>8                                     | 2 | cg24814707/cg25769<br>043                                      | 0.590043015 | 0.46921345  | 0.398481877 | -0.191561138 | 1.18E-09    | 1.57E-08    |
| TSS1500 | KIAA1644 | 22 | 44709224/4470989<br>1/44709614                            | 3 | cg03392837/cg18649<br>854/cg22576171                           | 0.640219883 | 0.543210783 | 0.422231193 | -0.217988689 | 4.68E-12    | 3.53E-10    |
| TSS1500 | KIAA1671 | 22 | 25422889/2542370<br>0/25423531                            | 3 | cg04692156/cg14966<br>613/cg17889356                           | 0.683305805 | 0.57995265  | 0.525666317 | -0.157639488 | 2.61E-11    | 9.87E-10    |
| TSS1500 | KIF16B   | 20 | 16555226/1655453<br>1/16555549/165555<br>19/16555475      | 5 | cg04189665/cg06390<br>653/cg14406419/cg1<br>7003395/cg26272575 | 0.572599097 | 0.468765763 | 0.403130248 | -0.169468848 | 1.69E-07    | 1.01E-06    |
| TSS1500 | KIF4B    | 5  | 154392274                                                 | 1 | cg11365072                                                     | 0.37462481  | 0.281270878 | 0.20956445  | -0.16506036  | 3.47E-11    | 1.21E-09    |
| TSS1500 | KIR2DL4  | 19 | 55314050/5531454<br>2                                     | 2 | cg01306806/cg13444<br>135                                      | 0.558463075 | 0.48903265  | 0.389622305 | -0.16884077  | 0.000113757 | 0.000331098 |
| TSS1500 | KIR3DX1  | 19 | 55042650/5504283<br>7/55042806                            | 3 | cg03108250/cg10731<br>960/cg23037932                           | 0.56462195  | 0.505934433 | 0.402681918 | -0.161940032 | 1.30E-06    | 5.97E-06    |
| TSS1500 | KLC3     | 19 | 45843694/4584272<br>3                                     | 2 | cg06864587/cg16855<br>440                                      | 0.73479337  | 0.631872261 | 0.540724059 | -0.194069311 | 4.05E-08    | 2.90E-07    |
| TSS1500 | KLK9     | 19 | 51514146/5151361<br>1/51513252/515132<br>96/51513883      | 5 | cg01144251/cg17031<br>773/cg18504937/cg2<br>0670939/cg27068996 | 0.636909479 | 0.572596844 | 0.474862456 | -0.162047023 | 4.25E-09    | 4.41E-08    |
| TSS1500 | KLRG1    | 12 | 9141740/9141775                                           | 2 | cg00443307/cg26806<br>779                                      | 0.721784318 | 0.576945203 | 0.381956675 | -0.339827643 | 4.18E-11    | 1.37E-09    |
| TSS1500 | KRBA1    | 7  | 149411377/149411<br>652/149410923/149<br>411256/149411498 | 5 | cg01269670/cg08131<br>100/cg09089451/cg1<br>4671222/cg23778596 | 0.408030093 | 0.479871996 | 0.596456009 | 0.188425916  | 1.10E-08    | 9.57E-08    |
| TSS1500 | KRT15    | 17 | 39676096/3967670<br>4                                     | 2 | cg08469845/cg15801<br>433                                      | 0.597117215 | 0.521795806 | 0.438599891 | -0.158517324 | 7.46E-12    | 4.72E-10    |
| TSS1500 | KRT26    | 17 | 38929184/3892966<br>2                                     | 2 | cg06456531/cg11079<br>711                                      | 0.477870633 | 0.344278794 | 0.26043897  | -0.217431663 | 4.86E-12    | 3.60E-10    |
| TSS1500 | KRT27    | 17 | 38939796/3894011<br>8/38939673/389401<br>32               | 4 | cg09563851/cg10173<br>723/cg14504826/cg1<br>6488522            | 0.688018896 | 0.583417704 | 0.455518333 | -0.232500563 | 2.76E-10    | 5.13E-09    |
| TSS1500 | KRT28    | 17 | 38956837/3895750<br>7                                     | 2 | cg16048803/cg17900<br>015                                      | 0.580754185 | 0.506782667 | 0.407487061 | -0.173267124 | 2.32E-08    | 1.80E-07    |

|         |           |    |                                                        |   |                                                                |             |             |             |              |             |             |
|---------|-----------|----|--------------------------------------------------------|---|----------------------------------------------------------------|-------------|-------------|-------------|--------------|-------------|-------------|
| TSS1500 | KRT38     | 17 | 39598940/3959843<br>0/39597980/395979 5<br>09/39597813 | 5 | cg07933967/cg14680<br>360/cg18425570/cg1<br>8848394/cg22139563 | 0.714402239 | 0.610894572 | 0.496418522 | -0.217983717 | 2.25E-09    | 2.63E-08    |
| TSS1500 | KRT5      | 12 | 52915064/5291503<br>6/52915646                         | 3 | cg00368577/cg17565<br>113/cg22566740                           | 0.46932701  | 0.362008222 | 0.291836832 | -0.177490178 | 1.79E-12    | 2.02E-10    |
| TSS1500 | KRT8      | 12 | 53299310/5329914<br>5/53300293                         | 3 | cg01835489/cg20324<br>165/cg26357344                           | 0.516273617 | 0.411677035 | 0.320502232 | -0.195771385 | 6.28E-11    | 1.74E-09    |
| TSS1500 | KRTAP10-5 | 21 | 46001928/4600168<br>0                                  | 2 | cg14363932/cg25937<br>451                                      | 0.692162755 | 0.616624286 | 0.540662    | -0.151500755 | 4.60E-06    | 1.84E-05    |
| TSS1500 | KRTAP12-3 | 21 | 46077454/4607758<br>2/46077562                         | 3 | cg04257752/cg15021<br>280/cg17839758                           | 0.46506563  | 0.351853017 | 0.299782016 | -0.165283614 | 1.44E-05    | 5.12E-05    |
| TSS1500 | KRTAP13-3 | 21 | 31799248/3179909<br>1                                  | 2 | cg07621949/cg24500<br>711                                      | 0.656129755 | 0.590849072 | 0.478530098 | -0.177599657 | 2.46E-07    | 1.41E-06    |
| TSS1500 | KRTAP13-4 | 21 | 31802169                                               | 1 | cg24082983                                                     | 0.558472755 | 0.452200783 | 0.301083264 | -0.257389491 | 3.49E-10    | 6.12E-09    |
| TSS1500 | KRTAP19-8 | 21 | 32412191                                               | 1 | cg06790305                                                     | 0.648607205 | 0.483502822 | 0.346723436 | -0.301883769 | 1.02E-08    | 8.97E-08    |
| TSS1500 | KRTAP20-3 | 21 | 32014696/3201385<br>6/32014658                         | 3 | cg06002471/cg06100<br>608/cg19708992                           | 0.79047898  | 0.744003217 | 0.639977961 | -0.150501019 | 4.39E-06    | 1.77E-05    |
| TSS1500 | KRTAP21-1 | 21 | 32128696/3212906<br>0/32128800/321287 4<br>08          | 4 | cg11354857/cg22373<br>097/cg22405653/cg2<br>2961727            | 0.757560785 | 0.6887691   | 0.593213933 | -0.164346852 | 3.12E-09    | 3.42E-08    |
| TSS1500 | KRTAP22-1 | 21 | 31972533/3197267<br>2/31972923/319729 4<br>13          | 4 | cg05572621/cg07945<br>323/cg26294716/cg2<br>7456885            | 0.703983528 | 0.603841164 | 0.52957761  | -0.174405917 | 5.41E-09    | 5.35E-08    |
| TSS1500 | KRTAP23-1 | 21 | 31722001                                               | 1 | cg24786671                                                     | 0.54144102  | 0.471419328 | 0.358596168 | -0.182844852 | 1.14E-07    | 7.14E-07    |
| TSS1500 | KRTAP24-1 | 21 | 31655654/3165582<br>2/31655982                         | 3 | cg09892262/cg16692<br>258/cg24184737                           | 0.73508976  | 0.631146252 | 0.542897868 | -0.192191892 | 1.57E-06    | 7.06E-06    |
| TSS1500 | KRTAP25-1 | 21 | 31663266                                               | 1 | cg11475420                                                     | 0.791629345 | 0.749222833 | 0.609950545 | -0.1816788   | 0.001132803 | 0.002675688 |
| TSS1500 | KRTAP3-1  | 17 | 39165675/3916569<br>7                                  | 2 | cg04566037/cg14957<br>731                                      | 0.401147948 | 0.314112767 | 0.245759118 | -0.155388829 | 1.45E-09    | 1.84E-08    |
| TSS1500 | KRTAP4-7  | 17 | 39239008/3923991<br>8                                  | 2 | cg16629452/cg25341<br>923                                      | 0.553094613 | 0.429659439 | 0.321880909 | -0.231213703 | 1.91E-12    | 2.06E-10    |
| TSS1500 | KRTAP4-9  | 17 | 39261100                                               | 1 | cg15015397                                                     | 0.573342895 | 0.438338633 | 0.339173591 | -0.234169304 | 3.34E-13    | 7.87E-11    |
| TSS1500 | KRTAP6-2  | 21 | 31972533/3197267<br>2                                  | 2 | cg05572621/cg07945<br>323                                      | 0.622442423 | 0.470917492 | 0.362859402 | -0.25958302  | 5.23E-12    | 3.76E-10    |
| TSS1500 | KRTAP7-1  | 21 | 32202284                                               | 1 | cg02642585                                                     | 0.765460345 | 0.707974806 | 0.601410059 | -0.164050286 | 2.55E-05    | 8.58E-05    |
| TSS1500 | L1TD1     | 1  | 62660188/6266019<br>1                                  | 2 | cg06190807/cg14850<br>026                                      | 0.616042125 | 0.497507064 | 0.454561398 | -0.161480727 | 4.86E-10    | 7.80E-09    |
| TSS1500 | LACRT     | 12 | 55029147/5502895<br>6/55029660                         | 3 | cg07643942/cg07855<br>572/cg19880901                           | 0.530885175 | 0.4219179   | 0.313562711 | -0.217322464 | 1.88E-09    | 2.26E-08    |



|         |        |    |                                                                                 |   |                                                                                         |             |             |             |              |          |          |
|---------|--------|----|---------------------------------------------------------------------------------|---|-----------------------------------------------------------------------------------------|-------------|-------------|-------------|--------------|----------|----------|
| TSS1500 | LAMA1  | 18 | 7118077/7118122/7118092                                                         | 3 | cg03159124/cg14950072/cg19909349                                                        | 0.32049846  | 0.412715654 | 0.601877356 | 0.281378896  | 3.13E-08 | 2.33E-07 |
| TSS1500 | LAMA2  | 6  | 129203075/129203783/129203887                                                   | 3 | cg01881054/cg15801019/cg20237610                                                        | 0.531843185 | 0.444779656 | 0.37181315  | -0.160030035 | 5.07E-08 | 3.53E-07 |
| TSS1500 | LAMA4  | 6  | 112576119/112576393/112576342                                                   | 3 | cg07628084/cg08844365/cg18080303                                                        | 0.608370817 | 0.553389943 | 0.445629029 | -0.162741788 | 8.77E-09 | 7.93E-08 |
| TSS1500 | LAMB3  | 1  | 209825856/209826863/209825747/209825943/209825849/209825678/209825672/209825731 | 8 | cg01580568/cg03967293/cg03977657/cg04873061/cg19709585/cg22502856/cg26107033/cg26533764 | 0.55592853  | 0.448079312 | 0.365375495 | -0.190553035 | 5.34E-11 | 1.60E-09 |
| TSS1500 | LAMC2  | 1  | 183154778/183153944                                                             | 2 | cg00208830/cg10519299                                                                   | 0.421969505 | 0.344875911 | 0.270515936 | -0.151453569 | 3.00E-09 | 3.32E-08 |
| TSS1500 | LARP4  | 12 | 50793981/50793961/50794308/50794088                                             | 4 | cg01928411/cg11063877/cg12582030/cg21902817                                             | 0.385205922 | 0.313389002 | 0.234615597 | -0.150590325 | 8.35E-12 | 4.91E-10 |
| TSS1500 | LASS3  | 15 | 101085341/101085710/101085210                                                   | 3 | cg08428878/cg12131707/cg15580989                                                        | 0.715416375 | 0.606574572 | 0.553232118 | -0.162184257 | 1.84E-05 | 6.40E-05 |
| TSS1500 | LBH    | 2  | 30453395/30454146/30453758                                                      | 3 | cg03801871/cg04092762/cg04253876                                                        | 0.234521091 | 0.306540372 | 0.388444163 | 0.153923072  | 1.21E-05 | 4.39E-05 |
| TSS1500 | LCE1A  | 1  | 152798912/152799138                                                             | 2 | cg01975957/cg06221609                                                                   | 0.732903533 | 0.688560611 | 0.57326007  | -0.159643462 | 7.26E-08 | 4.80E-07 |
| TSS1500 | LCE1F  | 1  | 152747562/152747472/152747501                                                   | 3 | cg13493250/cg23413307/cg26302157                                                        | 0.524542505 | 0.434719876 | 0.333897429 | -0.190645076 | 1.20E-11 | 5.93E-10 |
| TSS1500 | LCE2A  | 1  | 152670598/152669985                                                             | 2 | cg13974761/cg22616525                                                                   | 0.445367135 | 0.343731917 | 0.231782325 | -0.21358481  | 1.54E-15 | 8.67E-12 |
| TSS1500 | LCE6A  | 1  | 152814273/152814831/152813850/152815068                                         | 4 | cg09417355/cg16265542/cg22124859/cg26531371                                             | 0.685775702 | 0.568900296 | 0.446591103 | -0.239184599 | 2.31E-09 | 2.68E-08 |
| TSS1500 | LCN1   | 9  | 138413012                                                                       | 1 | cg23815000                                                                              | 0.587504685 | 0.509539744 | 0.40991645  | -0.177588235 | 9.42E-09 | 8.43E-08 |
| TSS1500 | LCN9   | 9  | 138554641/138554704                                                             | 2 | cg05025211/cg13555662                                                                   | 0.435718723 | 0.378925769 | 0.283764598 | -0.151954125 | 1.42E-09 | 1.81E-08 |
| TSS1500 | LEFTY1 | 1  | 226077628/226078237/226077303/226078135/226077287                               | 5 | cg00103855/cg12319004/cg14264773/cg15604953/cg25552768                                  | 0.54437355  | 0.459823659 | 0.387227207 | -0.157146343 | 6.98E-09 | 6.53E-08 |
| TSS1500 | LELP1  | 1  | 153175248/153174654/153175262/153174759                                         | 4 | cg02303399/cg06804411/cg23219336/cg24091195                                             | 0.715165969 | 0.646089385 | 0.526680835 | -0.188485134 | 9.77E-09 | 8.69E-08 |
| TSS1500 | LHFPL4 | 3  | 9596482/9596849                                                                 | 2 | cg00242951/cg23223755                                                                   | 0.653730158 | 0.565931014 | 0.459743066 | -0.193987092 | 1.13E-07 | 7.07E-07 |

|         |              |    |                                                                         |   |                                                                               |             |             |             |              |          |             |
|---------|--------------|----|-------------------------------------------------------------------------|---|-------------------------------------------------------------------------------|-------------|-------------|-------------|--------------|----------|-------------|
| TSS1500 | LHX8         | 1  | 75593476/7559295<br>0/75593804/755930<br>18/75593865/75593<br>596       | 6 | cg00419321/cg01005<br>080/cg01971160/cg0<br>9766820/cg11196437<br>/cg21009965 | 0.367582565 | 0.444971906 | 0.536440255 | 0.16885769   | 1.58E-07 | 9.56E-07    |
| TSS1500 | LIM2         | 19 | 51891526/5189242<br>8/51892299                                          | 3 | cg12491710/cg23389<br>776/cg24724596                                          | 0.390809215 | 0.290902511 | 0.210774955 | -0.18003426  | 2.23E-13 | 7.11E-11    |
| TSS1500 | LIPH         | 3  | 185271312/185271<br>385/185271383                                       | 3 | cg01390445/cg04513<br>882/cg16255307                                          | 0.861541818 | 0.827888689 | 0.665705432 | -0.195836386 | 7.48E-05 | 0.000226759 |
| TSS1500 | LOC100127888 | 20 | 61298677/6129910<br>6/61299190/612991<br>26                             | 4 | cg10486610/cg12502<br>929/cg14966074/cg1<br>8645150                           | 0.537722223 | 0.449535475 | 0.380737498 | -0.156984725 | 1.71E-09 | 2.10E-08    |
| TSS1500 | LOC100129794 | 14 | 37640247/3764045<br>5/37639757                                          | 3 | cg13017854/cg20597<br>409/cg26342676                                          | 0.763945803 | 0.696803739 | 0.560492405 | -0.203453398 | 1.45E-06 | 6.61E-06    |
| TSS1500 | LOC100130933 | 17 | 73641809/7364208<br>0/73642404                                          | 3 | cg07251887/cg11619<br>216/cg19468528                                          | 0.49860129  | 0.393641959 | 0.320715924 | -0.177885366 | 1.01E-11 | 5.38E-10    |
| TSS1500 | LOC100131193 | 9  | 139704416/139704<br>146                                                 | 2 | cg08055330/cg13728<br>106                                                     | 0.705329465 | 0.589939867 | 0.469584555 | -0.23574491  | 5.25E-07 | 2.72E-06    |
| TSS1500 | LOC100131496 | 20 | 45947025/4594642<br>9/45946271                                          | 3 | cg03082779/cg04504<br>205/cg20645040                                          | 0.363758615 | 0.261173481 | 0.195131955 | -0.16862666  | 1.09E-10 | 2.59E-09    |
| TSS1500 | LOC100133469 | 14 | 106937310/106938<br>234/106937869                                       | 3 | cg13275724/cg16023<br>283/cg20900869                                          | 0.723368845 | 0.641521967 | 0.490657027 | -0.232711818 | 1.84E-10 | 3.79E-09    |
| TSS1500 | LOC100133893 | 12 | 27925367                                                                | 1 | cg04279139                                                                    | 0.451170915 | 0.299006994 | 0.241501863 | -0.209669052 | 5.98E-12 | 4.10E-10    |
| TSS1500 | LOC100190940 | 12 | 130527106/130527<br>104/130527212                                       | 3 | cg02681173/cg10233<br>825/cg15848986                                          | 0.33267563  | 0.438905169 | 0.628995864 | 0.296320234  | 4.86E-08 | 3.40E-07    |
| TSS1500 | LOC100240726 | 20 | 45094318/4509454<br>8/45095158                                          | 3 | cg00351202/cg15815<br>117/cg21164545                                          | 0.717545525 | 0.647700422 | 0.553335232 | -0.164210293 | 1.58E-05 | 5.58E-05    |
| TSS1500 | LOC100240734 | 12 | 54494573/5449454<br>6                                                   | 2 | cg23295636/cg24134<br>056                                                     | 0.64105307  | 0.549873431 | 0.46494085  | -0.17611222  | 1.32E-09 | 1.71E-08    |
| TSS1500 | LOC100302640 | 3  | 106960066/106959<br>716/106959864/106<br>959817                         | 4 | cg09545443/cg12550<br>012/cg13694746/cg2<br>5233816                           | 0.094515851 | 0.184385669 | 0.255761091 | 0.16124524   | 5.48E-05 | 0.000170967 |
| TSS1500 | LOC149134    | 1  | 246952508/246952<br>362/246952118/246<br>952495/246952215/<br>246952048 | 6 | cg03340119/cg03596<br>016/cg05314024/cg0<br>8535928/cg15176829<br>/cg26898024 | 0.441644319 | 0.593780953 | 0.640010458 | 0.198366139  | 2.44E-07 | 1.39E-06    |
| TSS1500 | LOC149620    | 1  | 111822494/111822<br>347/111822068/111<br>822043                         | 4 | cg02815538/cg09138<br>965/cg09333723/cg2<br>1527708                           | 0.61799501  | 0.471464439 | 0.348441073 | -0.269553937 | 4.65E-13 | 8.92E-11    |

|         |           |    |                                                                                                                                                                                                                                |                                                                                                                                                                                                                                                                             |             |             |             |              |          |             |
|---------|-----------|----|--------------------------------------------------------------------------------------------------------------------------------------------------------------------------------------------------------------------------------|-----------------------------------------------------------------------------------------------------------------------------------------------------------------------------------------------------------------------------------------------------------------------------|-------------|-------------|-------------|--------------|----------|-------------|
| TSS1500 | LOC154822 | 7  | 158800547/158799<br>748/158799715/158 5<br>799777/158800132                                                                                                                                                                    | cg00600916/cg10874<br>111/cg11772799/cg1<br>4302471/cg18194535                                                                                                                                                                                                              | 0.618417935 | 0.5266688   | 0.444839188 | -0.173578747 | 7.04E-12 | 4.53E-10    |
| TSS1500 | LOC157627 | 8  | 9761905/9761454/9<br>761141/9761171/97 7<br>62300/9762100/976<br>2057                                                                                                                                                          | cg06292304/cg12616<br>174/cg14278808/cg1<br>5248835/cg15537082<br>/cg18246262/cg2418<br>5864                                                                                                                                                                                | 0.21117185  | 0.309867936 | 0.474917205 | 0.263745355  | 2.25E-07 | 1.30E-06    |
| TSS1500 | LOC220115 | 13 | 53061810/5306170 2                                                                                                                                                                                                             | cg24527452/cg24577<br>699                                                                                                                                                                                                                                                   | 0.737200465 | 0.608814525 | 0.487636289 | -0.249564176 | 9.91E-13 | 1.45E-10    |
| TSS1500 | LOC254312 | 10 | 10994495/1099506 2<br>0                                                                                                                                                                                                        | cg17261125/cg23610<br>154                                                                                                                                                                                                                                                   | 0.648268078 | 0.556177344 | 0.47912463  | -0.169143448 | 3.24E-07 | 1.78E-06    |
| TSS1500 | LOC283392 | 12 | 72667526/7266749<br>3/72667512/726677 4<br>07                                                                                                                                                                                  | cg04640250/cg11054<br>631/cg19188182/cg1<br>9516457                                                                                                                                                                                                                         | 0.337556387 | 0.429673511 | 0.577333436 | 0.239777049  | 1.32E-08 | 1.12E-07    |
| TSS1500 | LOC283731 | 15 | 74422275/7442275<br>0/74421935/744223<br>30/74422528/74421<br>857/74421848/7442<br>2632/74422935/744<br>21887/74422572/74 20<br>422761/74422282/7<br>4422629/74422550/<br>74422933/7442254<br>5/74421918/744230<br>77/74421909 | cg00550503/cg02378<br>847/cg02709205/cg0<br>5505745/cg05923854<br>/cg06041677/cg0870<br>3540/cg10070260/cg<br>11315754/cg1201791<br>1/cg18887483/cg210<br>63758/cg23152885/c<br>g23392501/cg241235<br>18/cg24374861/cg24<br>653100/cg25705558/<br>cg26091142/cg27200<br>833 | 0.218381254 | 0.238989787 | 0.370833067 | 0.152451813  | 3.63E-05 | 0.000118026 |
| TSS1500 | LOC283761 | 15 | 90068229/9006804 3<br>4/90068496                                                                                                                                                                                               | cg00502017/cg07518<br>380/cg14584565                                                                                                                                                                                                                                        | 0.58161704  | 0.496992733 | 0.404183895 | -0.177433145 | 2.66E-07 | 1.50E-06    |
| TSS1500 | LOC283867 | 16 | 65611542/6561136 3<br>9/65610659                                                                                                                                                                                               | cg02944238/cg03000<br>116/cg07779653                                                                                                                                                                                                                                        | 0.66190025  | 0.580839717 | 0.477156227 | -0.184744023 | 2.85E-06 | 1.20E-05    |
| TSS1500 | LOC283999 | 17 | 76226563/7622673 3<br>5/76226122                                                                                                                                                                                               | cg08930147/cg09445<br>803/cg22108646                                                                                                                                                                                                                                        | 0.497796893 | 0.394618636 | 0.332521795 | -0.165275097 | 6.72E-11 | 1.83E-09    |
| TSS1500 | LOC284688 | 1  | 170254397/170253<br>944/170253617/170 4<br>254369                                                                                                                                                                              | cg01057196/cg04909<br>854/cg13065624/cg2<br>3038594                                                                                                                                                                                                                         | 0.701184026 | 0.572779628 | 0.541802827 | -0.159381199 | 1.40E-05 | 5.00E-05    |
| TSS1500 | LOC285205 | 3  | 107601033/107601<br>227/107601098 3                                                                                                                                                                                            | cg22488719/cg22949<br>077/cg25703122                                                                                                                                                                                                                                        | 0.6312059   | 0.548032717 | 0.46758275  | -0.16362315  | 3.94E-09 | 4.17E-08    |
| TSS1500 | LOC285375 | 3  | 13691504/1369196 2<br>7                                                                                                                                                                                                        | cg01325116/cg20187<br>719                                                                                                                                                                                                                                                   | 0.58385671  | 0.50451725  | 0.417564986 | -0.166291724 | 2.50E-07 | 1.43E-06    |

|         |           |    |                                                           |   |                                                                |             |             |             |              |            |             |
|---------|-----------|----|-----------------------------------------------------------|---|----------------------------------------------------------------|-------------|-------------|-------------|--------------|------------|-------------|
| TSS1500 | LOC285419 | 4  | 124572578/124694<br>661/124694178/124<br>694137           | 4 | cg15826810/cg19297<br>164/cg19922435/cg2<br>2872906            | 0.458488961 | 0.371239064 | 0.302701918 | -0.155787044 | 9.33E-11   | 2.33E-09    |
| TSS1500 | LOC285593 | 5  | 173005254/173005<br>657/173006447/173<br>005622/173005325 | 5 | cg14904688/cg16026<br>902/cg23987381/cg2<br>7033712/cg27128739 | 0.808501848 | 0.740257783 | 0.642807986 | -0.165693861 | 1.57E-05   | 5.57E-05    |
| TSS1500 | LOC285627 | 5  | 158894390/158894<br>440/158893488                         | 3 | cg07829289/cg16338<br>178/cg19017803                           | 0.750007188 | 0.520880192 | 0.426324782 | -0.323682406 | 4.84E-11   | 1.51E-09    |
| TSS1500 | LOC285796 | 6  | 163746113/163746<br>145/163746175                         | 3 | cg14529406/cg17684<br>207/cg21229979                           | 0.244707735 | 0.347835903 | 0.420380989 | 0.175673254  | 0.00025674 | 0.000692386 |
| TSS1500 | LOC286094 | 8  | 136245114/136245<br>226/136245867                         | 3 | cg00937286/cg25053<br>164/cg25188398                           | 0.739040135 | 0.665511231 | 0.524096264 | -0.214943871 | 1.16E-07   | 7.22E-07    |
| TSS1500 | LOC388428 | 17 | 79138873/7913908<br>7/79139096                            | 3 | cg05569220/cg06136<br>185/cg11689732                           | 0.638980265 | 0.562542474 | 0.471873509 | -0.167106756 | 1.09E-11   | 5.55E-10    |
| TSS1500 | LOC400804 | 1  | 221510889/221510<br>043/221510354                         | 3 | cg19865770/cg20482<br>462/cg27518240                           | 0.70046702  | 0.630086897 | 0.494556416 | -0.205910604 | 1.04E-07   | 6.60E-07    |
| TSS1500 | LOC400931 | 22 | 46481099/4648089<br>1/46481248/464816<br>03               | 4 | cg03412618/cg04329<br>382/cg10352237/cg2<br>1094022            | 0.689967818 | 0.562328522 | 0.452296267 | -0.237671552 | 5.40E-11   | 1.60E-09    |
| TSS1500 | LOC402644 | 7  | 28319676/2831959<br>4/28319589                            | 3 | cg00863007/cg00924<br>052/cg00927666                           | 0.60195079  | 0.483976194 | 0.380082259 | -0.221868531 | 3.76E-09   | 3.99E-08    |
| TSS1500 | LOC402778 | 11 | 1770066/1770595/1<br>770181/1769645/17<br>70394           | 5 | cg07523553/cg15536<br>116/cg16328251/cg1<br>6934127/cg27226043 | 0.288526535 | 0.341644683 | 0.466506763 | 0.177980228  | 2.83E-05   | 9.45E-05    |
| TSS1500 | LOC407835 | 7  | 128765150/128765<br>077/128765024                         | 3 | cg02625727/cg06785<br>701/cg16588297                           | 0.831062313 | 0.684978942 | 0.567967386 | -0.263094926 | 3.09E-11   | 1.11E-09    |
| TSS1500 | LOC441666 | 10 | 42864633/4286491<br>2                                     | 2 | cg08967936/cg23853<br>165                                      | 0.756067858 | 0.617767356 | 0.499858898 | -0.25620896  | 1.92E-08   | 1.54E-07    |
| TSS1500 | LOC642587 | 1  | 209600926/209601<br>066/209601422/209<br>600938           | 4 | cg04295258/cg21823<br>119/cg22166446/cg2<br>5733599            | 0.703638349 | 0.631787419 | 0.52822314  | -0.175415209 | 7.38E-10   | 1.08E-08    |
| TSS1500 | LOC642852 | 21 | 46706579/4670682<br>0/46706759/467070<br>12               | 4 | cg05091734/cg08538<br>258/cg14522034/cg1<br>7353354            | 0.585240355 | 0.672704184 | 0.755061431 | 0.169821076  | 2.02E-10   | 4.07E-09    |
| TSS1500 | LOC643387 | 2  | 239139518/239139<br>911/239140032/239<br>140024           | 4 | cg02536451/cg06102<br>419/cg11904906/cg1<br>3957874            | 0.475030078 | 0.540146742 | 0.658296873 | 0.183266795  | 7.98E-10   | 1.14E-08    |

|         |           |    |                                                                                                               |   |                                                                                                                        |             |             |             |              |             |             |
|---------|-----------|----|---------------------------------------------------------------------------------------------------------------|---|------------------------------------------------------------------------------------------------------------------------|-------------|-------------|-------------|--------------|-------------|-------------|
| TSS1500 | LOC644145 | 4  | 56685845/5668597<br>2                                                                                         | 2 | cg13985817/cg16606<br>320                                                                                              | 0.518198053 | 0.612309308 | 0.698672482 | 0.180474429  | 5.87E-11    | 1.67E-09    |
| TSS1500 | LOC723809 | 7  | 104568180/104567<br>372/104567387                                                                             | 3 | cg02384419/cg05595<br>832/cg16314851                                                                                   | 0.703838912 | 0.606622094 | 0.524737771 | -0.17910114  | 9.75E-08    | 6.21E-07    |
| TSS1500 | LOC729384 | 11 | 89656189/8965494<br>6/89654367/896558<br>71                                                                   | 4 | cg03068446/cg13738<br>382/cg22405122/cg2<br>3481862                                                                    | 0.62846035  | 0.488757044 | 0.367714518 | -0.260745832 | 4.94E-11    | 1.53E-09    |
| TSS1500 | LOC732275 | 16 | 86380594/8637987<br>2                                                                                         | 2 | cg04475868/cg05825<br>085                                                                                              | 0.67583703  | 0.604839006 | 0.512462468 | -0.163374562 | 0.000216844 | 0.000593023 |
| TSS1500 | LOC90246  | 3  | 128225824/128226<br>071/128225898                                                                             | 3 | cg01886524/cg19234<br>171/cg27319445                                                                                   | 0.58364543  | 0.486038464 | 0.37908442  | -0.20456101  | 7.34E-12    | 4.66E-10    |
| TSS1500 | LONP2     | 16 | 48277879/4827755<br>9                                                                                         | 2 | cg03354717/cg09539<br>739                                                                                              | 0.594269068 | 0.443638378 | 0.358753823 | -0.235515245 | 1.49E-11    | 6.82E-10    |
| TSS1500 | LPPR5     | 1  | 99471295/9947089<br>5/99470709/994709<br>67/99470801                                                          | 5 | cg03593336/cg05657<br>427/cg06124224/cg1<br>4241810/cg26266842                                                         | 0.234989543 | 0.288484527 | 0.41691794  | 0.181928397  | 7.78E-08    | 5.10E-07    |
| TSS1500 | LRAT      | 4  | 155664242/155664<br>954/155664941/155<br>664150/155664311/<br>155664223/155663<br>689/155663836/155<br>663990 | 9 | cg00714184/cg05763<br>228/cg07207220/cg1<br>0203610/cg16566627<br>/cg22888418/cg2358<br>7449/cg23676439/cg<br>25806701 | 0.260433553 | 0.312097273 | 0.448931213 | 0.18849766   | 4.24E-06    | 1.71E-05    |
| TSS1500 | LRFN1     | 19 | 39806765/3980652<br>2/39807167                                                                                | 3 | cg00471142/cg18592<br>745/cg26768966                                                                                   | 0.779306737 | 0.679745354 | 0.552807456 | -0.226499281 | 1.41E-08    | 1.18E-07    |
| TSS1500 | LRFN5     | 14 | 42075865/4207555<br>4/42075760/420759<br>75/42075810/42075<br>406/42075664/4207<br>6492                       | 8 | cg02150867/cg02454<br>806/cg04171065/cg0<br>5943996/cg10160975<br>/cg10327400/cg2152<br>6847/cg23955431                | 0.219774383 | 0.317605529 | 0.485380155 | 0.265605772  | 5.17E-08    | 3.58E-07    |
| TSS1500 | LRGUK     | 7  | 133811808/133811<br>837/133811828                                                                             | 3 | cg14455998/cg17676<br>607/cg19967800                                                                                   | 0.106828097 | 0.17019928  | 0.297776353 | 0.190948256  | 0.000560825 | 0.001412971 |
| TSS1500 | LRIT2     | 10 | 85986738/8598656<br>5/85985779                                                                                | 3 | cg01614169/cg02790<br>260/cg19717640                                                                                   | 0.68959963  | 0.640053965 | 0.537046526 | -0.152553104 | 2.94E-07    | 1.64E-06    |
| TSS1500 | LRP1B     | 2  | 142890490/142890<br>700                                                                                       | 2 | cg04133673/cg21340<br>845                                                                                              | 0.501603585 | 0.430920775 | 0.303982293 | -0.197621292 | 2.61E-09    | 2.97E-08    |
| TSS1500 | LRRC15    | 3  | 194091192/194091<br>167/194090730                                                                             | 3 | cg02121427/cg07048<br>348/cg13321259                                                                                   | 0.436879946 | 0.33448417  | 0.242659559 | -0.194220387 | 5.56E-11    | 1.63E-09    |
| TSS1500 | LRRC18    | 10 | 50123030/5012334<br>4/50123203                                                                                | 3 | cg01357233/cg11915<br>309/cg17858662                                                                                   | 0.783549975 | 0.664677335 | 0.533254877 | -0.250295098 | 2.81E-09    | 3.16E-08    |

|         |        |    |                                                       |   |                                                                   |             |             |             |              |             |             |
|---------|--------|----|-------------------------------------------------------|---|-------------------------------------------------------------------|-------------|-------------|-------------|--------------|-------------|-------------|
| TSS1500 | LRRC30 | 18 | 7230489/7229726/7230245                               | 3 | cg03759556/cg06616178/cg13543667                                  | 0.733707528 | 0.649004335 | 0.566750261 | -0.166957268 | 9.41E-11    | 2.34E-09    |
| TSS1500 | LRRC31 | 3  | 169588236/169588423                                   | 2 | cg04548519/cg05924537                                             | 0.531880333 | 0.433872622 | 0.345394005 | -0.186486328 | 2.15E-11    | 8.62E-10    |
| TSS1500 | LRRC3B | 3  | 26663593/26663805/26663626/26663740/26663885/26663551 | 6 | cg04954680/cg10332616/cg10768206/cg13689261/cg13964105/cg18404374 | 0.394196023 | 0.481931106 | 0.616193942 | 0.22199792   | 2.15E-09    | 2.54E-08    |
| TSS1500 | LRRC4  | 7  | 127672235/127672473/127672458/127672169/127672152     | 5 | cg04153784/cg09087503/cg12628196/cg15087147/cg27573591            | 0.088532415 | 0.264454207 | 0.408407066 | 0.319874652  | 4.94E-11    | 1.53E-09    |
| TSS1500 | LRRC52 | 1  | 165512398/165513253/165512980                         | 3 | cg03454607/cg16509443/cg17495466                                  | 0.642337243 | 0.551586514 | 0.456601775 | -0.185735468 | 9.92E-09    | 8.81E-08    |
| TSS1500 | LRRC55 | 11 | 56948018/56947754/56948015                            | 3 | cg03717588/cg11751645/cg24458609                                  | 0.235242513 | 0.401743172 | 0.461201923 | 0.22595941   | 4.25E-05    | 0.000136187 |
| TSS1500 | LRRC8E | 19 | 7953071/7953054/7953081                               | 3 | cg17494927/cg17731776/cg26149920                                  | 0.576554692 | 0.437104054 | 0.360019982 | -0.21653471  | 1.96E-12    | 2.06E-10    |
| TSS1500 | LRRK2  | 12 | 40618560/40618356/40618575/40618284                   | 4 | cg05667817/cg11684647/cg18050543/cg23699274                       | 0.086289493 | 0.133620735 | 0.246389655 | 0.160100162  | 0.000944048 | 0.002266826 |
| TSS1500 | LRTM1  | 3  | 54962954/54962380/54963186                            | 3 | cg02810692/cg11383981/cg16418228                                  | 0.620259175 | 0.530860483 | 0.438679721 | -0.181579454 | 3.77E-09    | 4.00E-08    |
| TSS1500 | LUZP1  | 1  | 23496648/23495577/23495997/23496304                   | 4 | cg01435109/cg25610515/cg26051750/cg26530485                       | 0.450025862 | 0.363369439 | 0.285846568 | -0.164179293 | 1.83E-05    | 6.38E-05    |
| TSS1500 | LUZP2  | 11 | 24518281/24518225/24518149                            | 3 | cg10345326/cg13376598/cg24473393                                  | 0.24979755  | 0.299755389 | 0.410934256 | 0.161136706  | 0.000345447 | 0.000908204 |
| TSS1500 | LVRN   | 5  | 115297723/115297690/115297853/115297488               | 4 | cg06644553/cg10199250/cg15489294/cg23915769                       | 0.390596855 | 0.434036431 | 0.606987731 | 0.216390876  | 1.39E-08    | 1.17E-07    |
| TSS1500 | LXN    | 3  | 158390769/158390821/158390778                         | 3 | cg08263647/cg17481912/cg17977250                                  | 0.362378473 | 0.263283233 | 0.2025658   | -0.159812673 | 3.32E-11    | 1.17E-09    |
| TSS1500 | LY86   | 6  | 6588693/6587445/6588089                               | 3 | cg03349397/cg13125224/cg20162076                                  | 0.73167312  | 0.691454739 | 0.570090132 | -0.161582988 | 2.10E-05    | 7.21E-05    |
| TSS1500 | LYSMD4 | 15 | 100274128/100274248/100273828/100274195               | 4 | cg02329205/cg02724404/cg05414235/cg12967560                       | 0.368548174 | 0.261224847 | 0.201254954 | -0.167293219 | 3.33E-13    | 7.87E-11    |

|         |        |    |                                                                   |   |                                                                               |             |             |             |              |          |          |
|---------|--------|----|-------------------------------------------------------------------|---|-------------------------------------------------------------------------------|-------------|-------------|-------------|--------------|----------|----------|
| TSS1500 | MAEL   | 1  | 166958221/166958<br>308/166958273/166<br>958233                   | 4 | cg18894878/cg23968<br>893/cg24453820/cg2<br>7053975                           | 0.786243959 | 0.712467403 | 0.631748922 | -0.154495037 | 2.33E-09 | 2.69E-08 |
| TSS1500 | MAL    | 2  | 95691255/9569082<br>1/95690169/956912<br>28/95691051              | 5 | cg04804539/cg05142<br>617/cg05314420/cg0<br>9983051/cg21245652                | 0.407244651 | 0.472105504 | 0.585547321 | 0.17830267   | 2.87E-08 | 2.17E-07 |
| TSS1500 | MAPRE1 | 20 | 31407338/3140734<br>8                                             | 2 | cg11800794/cg14303<br>674                                                     | 0.647181228 | 0.565159331 | 0.488071902 | -0.159109325 | 2.39E-06 | 1.03E-05 |
| TSS1500 | 9-Mar  | 12 | 58147425                                                          | 1 | cg03249863                                                                    | 0.7284345   | 0.668873322 | 0.576746177 | -0.151688323 | 1.49E-06 | 6.75E-06 |
| TSS1500 | MAT1A  | 10 | 82050793/8205067<br>2/82049858                                    | 3 | cg00977842/cg07959<br>747/cg19765377                                          | 0.48812237  | 0.385289378 | 0.298287173 | -0.189835197 | 7.77E-11 | 2.02E-09 |
| TSS1500 | MBL1P  | 10 | 81679675/8167882<br>9                                             | 2 | cg07726667/cg27320<br>518                                                     | 0.523452085 | 0.443618861 | 0.354106232 | -0.169345853 | 9.06E-07 | 4.39E-06 |
| TSS1500 | MBLAC1 | 7  | 99723162/9972411<br>2/99723100                                    | 3 | cg09417640/cg24028<br>459/cg26650651                                          | 0.7201235   | 0.613934419 | 0.499565611 | -0.220557889 | 2.63E-09 | 2.98E-08 |
| TSS1500 | MCAM   | 11 | 119189289/119188<br>145                                           | 2 | cg08861493/cg21096<br>399                                                     | 0.67546607  | 0.560402567 | 0.458232082 | -0.217233988 | 6.29E-12 | 4.16E-10 |
| TSS1500 | MCHR2  | 6  | 100442553/100442<br>489                                           | 2 | cg03809898/cg08430<br>325                                                     | 0.668931825 | 0.609099583 | 0.48698425  | -0.181947575 | 1.28E-06 | 5.91E-06 |
| TSS1500 | MDGA2  | 14 | 48145108/4814428<br>0/48145000/481443<br>69/48144765              | 5 | cg08217024/cg09155<br>219/cg18856581/cg1<br>9672997/cg23254031                | 0.372531368 | 0.458571993 | 0.601586988 | 0.22905562   | 1.56E-10 | 3.34E-09 |
| TSS1500 | MELK   | 9  | 36572645/3657241<br>1/36572421/365726<br>85                       | 4 | cg01288067/cg14279<br>528/cg14431547/cg1<br>4552260                           | 0.492432652 | 0.387820779 | 0.325611903 | -0.166820749 | 2.97E-10 | 5.41E-09 |
| TSS1500 | MEOX2  | 7  | 15727441/1572682<br>1/15727598/157275<br>25/15727127/15726<br>649 | 6 | cg00839579/cg02908<br>900/cg02969141/cg0<br>3985727/cg07395354<br>/cg13047892 | 0.333475658 | 0.396422489 | 0.494892993 | 0.161417335  | 1.83E-05 | 6.36E-05 |
| TSS1500 | MEPE   | 4  | 88753434/8875317<br>9/88752660                                    | 3 | cg07651189/cg10702<br>457/cg13255629                                          | 0.65143326  | 0.571670817 | 0.487158295 | -0.164274965 | 1.12E-07 | 7.04E-07 |

|         |          |    |                                                                                                                                                                                                                                                                                                                                                                                                                                                                              |                                                                                                                                                                                                                                                                                                                                                                                                                                                                                                                |                                                                                              |             |             |             |              |             |             |
|---------|----------|----|------------------------------------------------------------------------------------------------------------------------------------------------------------------------------------------------------------------------------------------------------------------------------------------------------------------------------------------------------------------------------------------------------------------------------------------------------------------------------|----------------------------------------------------------------------------------------------------------------------------------------------------------------------------------------------------------------------------------------------------------------------------------------------------------------------------------------------------------------------------------------------------------------------------------------------------------------------------------------------------------------|----------------------------------------------------------------------------------------------|-------------|-------------|-------------|--------------|-------------|-------------|
| TSS1500 | MESTIT1  | 7  | 130131633/130132<br>265/130132422/130<br>131484/130131403/<br>130131691/130132<br>161/130132259/130<br>131826/130131916/<br>130131931/130131<br>887/130132413/130<br>131829/130131676/<br>130131905/130131<br>258/130132453/130<br>131869/130131480/ 37<br>130132199/130131<br>566/130132298/130<br>131709/130131923/<br>130132319/130131<br>921/130131359/130<br>132419/130131797/<br>130131367/130132<br>305/130131268/130<br>132360/130131730/<br>130131885/130132<br>286 | cg00286878/cg01784<br>351/cg03588221/cg0<br>4344875/cg04678950<br>/cg04786207/cg0555<br>6276/cg05862114/cg<br>06212135/cg0731501<br>8/cg07870293/cg090<br>80913/cg09462536/c<br>g10249538/cg123473<br>92/cg13104298/cg13<br>917504/cg13986840/<br>cg16823958/cg17079<br>325/cg17580798/cg1<br>8934293/cg19344806<br>/cg19386484/cg2005<br>0761/cg21200654/cg<br>21629528/cg2166711<br>6/cg22592140/cg227<br>05386/cg23156962/c<br>g23714917/cg254071<br>98/cg25519926/cg26<br>708559/cg27338480/<br>cg27589003 | 0.6173555                                                                                    | 0.683000804 | 0.769635892 | 0.152280392 | 6.46E-13     | 1.11E-10    |             |
| TSS1500 | METTL8   | 2  | 172291680                                                                                                                                                                                                                                                                                                                                                                                                                                                                    | 1                                                                                                                                                                                                                                                                                                                                                                                                                                                                                                              | cg06772099                                                                                   | 0.558694    | 0.451223483 | 0.365377459 | -0.193316541 | 1.50E-11    | 6.86E-10    |
| TSS1500 | MFRP     | 11 | 119218027/119217<br>884/119218238                                                                                                                                                                                                                                                                                                                                                                                                                                            | 3                                                                                                                                                                                                                                                                                                                                                                                                                                                                                                              | cg10904867/cg16996<br>281/cg19560971                                                         | 0.499881308 | 0.387882361 | 0.274490673 | -0.225390635 | 6.58E-13    | 1.11E-10    |
| TSS1500 | MGC27382 | 1  | 78694398/7869389<br>9                                                                                                                                                                                                                                                                                                                                                                                                                                                        | 2                                                                                                                                                                                                                                                                                                                                                                                                                                                                                                              | cg06975633/cg22559<br>013                                                                    | 0.517239735 | 0.615099331 | 0.678263693 | 0.161023958  | 4.99E-10    | 7.96E-09    |
| TSS1500 | MGC42105 | 5  | 43191993/4319197<br>5                                                                                                                                                                                                                                                                                                                                                                                                                                                        | 2                                                                                                                                                                                                                                                                                                                                                                                                                                                                                                              | cg21098557/cg23502<br>772                                                                    | 0.137492416 | 0.21099606  | 0.323634028 | 0.186141612  | 0.001056628 | 0.002509194 |
| TSS1500 | MGC45800 | 4  | 183066237/183066<br>224/183066337                                                                                                                                                                                                                                                                                                                                                                                                                                            | 3                                                                                                                                                                                                                                                                                                                                                                                                                                                                                                              | cg03839661/cg04143<br>736/cg10603183                                                         | 0.139401321 | 0.197654173 | 0.346387791 | 0.20698647   | 0.000683807 | 0.001690055 |
| TSS1500 | MGP      | 12 | 15039432/1503956<br>0/15039397                                                                                                                                                                                                                                                                                                                                                                                                                                               | 3                                                                                                                                                                                                                                                                                                                                                                                                                                                                                                              | cg13302154/cg16617<br>257/cg22221831                                                         | 0.41907688  | 0.317507364 | 0.244825323 | -0.174251557 | 5.86E-10    | 8.99E-09    |
| TSS1500 | MGST1    | 12 | 16505000/1649919<br>0/16505650/164999<br>63/16500185/16500<br>403/16500077                                                                                                                                                                                                                                                                                                                                                                                                   | 7                                                                                                                                                                                                                                                                                                                                                                                                                                                                                                              | cg00609333/cg06610<br>614/cg10449466/cg1<br>0548102/cg11203041<br>/cg18233746/cg2711<br>7982 | 0.50644357  | 0.411752113 | 0.355370401 | -0.151073169 | 3.11E-12    | 2.81E-10    |



|         |           |    |                                                             |   |                                                                   |             |             |             |              |          |          |
|---------|-----------|----|-------------------------------------------------------------|---|-------------------------------------------------------------------|-------------|-------------|-------------|--------------|----------|----------|
| TSS1500 | MINPP1    | 10 | 89263900/89263946/89263949                                  | 3 | cg02614016/cg06090298/cg16132151                                  | 0.759484993 | 0.648474591 | 0.575135247 | -0.184349746 | 1.32E-08 | 1.12E-07 |
| TSS1500 | MIOX      | 22 | 50923890/50924745/50923963                                  | 3 | cg13332571/cg19621271/cg23513727                                  | 0.744776612 | 0.648096317 | 0.562427082 | -0.18234953  | 2.48E-10 | 4.72E-09 |
| TSS1500 | MIR100    | 11 | 122023504                                                   | 1 | cg24655701                                                        | 0.533257555 | 0.429848106 | 0.302563009 | -0.230694546 | 1.04E-12 | 1.51E-10 |
| TSS1500 | MIR10A    | 17 | 46657555/46658170/46657656                                  | 3 | cg01572694/cg04514255/cg14884929                                  | 0.409854038 | 0.318621502 | 0.259074667 | -0.150779372 | 4.87E-10 | 7.82E-09 |
| TSS1500 | MIR1179   | 15 | 89149849/89150842                                           | 2 | cg05013243/cg08867933                                             | 0.59760518  | 0.532840106 | 0.401139295 | -0.196465885 | 5.42E-07 | 2.80E-06 |
| TSS1500 | MIR1185-2 | 14 | 101509249/101509391/101510016/101509281/101509144           | 5 | cg01205338/cg01709493/cg02975060/cg03547809/cg13098800            | 0.787765985 | 0.706664617 | 0.616338652 | -0.171427333 | 2.91E-08 | 2.20E-07 |
| TSS1500 | MIR124-1  | 8  | 9761905/9761454/9762300/9762100/9762057                     | 5 | cg06292304/cg12616174/cg15537082/cg18246262/cg24185864            | 0.220295895 | 0.314818128 | 0.457661601 | 0.237365706  | 7.73E-07 | 3.82E-06 |
| TSS1500 | MIR124-2  | 8  | 65291287/65291341/65290484/65290320/65290848                | 5 | cg02226645/cg04104463/cg07792478/cg10698928/cg14590098            | 0.376358443 | 0.479843157 | 0.585473476 | 0.209115034  | 1.68E-08 | 1.37E-07 |
| TSS1500 | MIR124-3  | 20 | 61809035/61808888/61809348/61808691/61809557                | 5 | cg02065637/cg02650317/cg04927004/cg08737296/cg15699267            | 0.187117414 | 0.288151058 | 0.443465535 | 0.256348122  | 1.86E-07 | 1.11E-06 |
| TSS1500 | MIR1251   | 12 | 97885353/97884975/97885270                                  | 3 | cg00030523/cg17967602/cg27533635                                  | 0.597145763 | 0.51609387  | 0.43601167  | -0.161134094 | 9.51E-12 | 5.15E-10 |
| TSS1500 | MIR125B1  | 11 | 121971219/121970768/121971954/121971232/121971092/121971247 | 6 | cg06749053/cg07281370/cg07685357/cg20475322/cg24150623/cg24603444 | 0.409153656 | 0.465950062 | 0.577771757 | 0.168618102  | 4.86E-09 | 4.94E-08 |
| TSS1500 | MIR1283-2 | 19 | 54260014/54260952/54260627                                  | 3 | cg02991888/cg16908824/cg26242772                                  | 0.643736055 | 0.508172161 | 0.389747636 | -0.253988419 | 2.05E-09 | 2.44E-08 |
| TSS1500 | MIR129-1  | 7  | 127846739/127847603/127847045                               | 3 | cg04840800/cg11364290/cg24044186                                  | 0.685890575 | 0.579163158 | 0.429474025 | -0.25641655  | 2.63E-11 | 9.91E-10 |
| TSS1500 | MIR129-2  | 11 | 43602179/43602436/43602000/43601969/43602420/43602017       | 6 | cg01514668/cg04355791/cg06372015/cg11074814/cg11638181/cg14901205 | 0.239342681 | 0.324975682 | 0.451839116 | 0.212496435  | 2.43E-06 | 1.04E-05 |
| TSS1500 | MIR133A2  | 20 | 61160996/61161073/61161232                                  | 3 | cg04990378/cg07915635/cg17267710                                  | 0.736885295 | 0.627608472 | 0.53484778  | -0.202037515 | 1.63E-08 | 1.33E-07 |

|         |          |    |                                                                         |   |                                                                                         |             |             |             |              |          |             |
|---------|----------|----|-------------------------------------------------------------------------|---|-----------------------------------------------------------------------------------------|-------------|-------------|-------------|--------------|----------|-------------|
| TSS1500 | MIR135B  | 1  | 205418278/205418410                                                     | 2 | cg02520707/cg13061767                                                                   | 0.725982255 | 0.550687044 | 0.453863557 | -0.272118698 | 2.65E-10 | 4.98E-09    |
| TSS1500 | MIR138-2 | 16 | 56891173/56891111                                                       | 2 | cg02961808/cg26475094                                                                   | 0.785997763 | 0.683107044 | 0.533238943 | -0.252758819 | 2.37E-10 | 4.58E-09    |
| TSS1500 | MIR141   | 12 | 7072696/7072891/7072765/7071814/7072727                                 | 5 | cg00366413/cg18959988/cg22413603/cg24702147/cg27534624                                  | 0.515926418 | 0.409691613 | 0.324465546 | -0.191460872 | 5.99E-11 | 1.69E-09    |
| TSS1500 | MIR147   | 9  | 123007911                                                               | 1 | cg09399225                                                                              | 0.55051652  | 0.421065983 | 0.333741941 | -0.216774579 | 3.31E-10 | 5.88E-09    |
| TSS1500 | MIR147B  | 15 | 45724277/45724580                                                       | 2 | cg20636382/cg23505252                                                                   | 0.621534738 | 0.484264992 | 0.39664795  | -0.224886788 | 1.06E-11 | 5.47E-10    |
| TSS1500 | MIR154   | 14 | 101525784/101525465/101525106/101524635                                 | 4 | cg06265809/cg11069071/cg19477205/cg23029159                                             | 0.607642039 | 0.523455899 | 0.411739017 | -0.195903022 | 1.17E-09 | 1.56E-08    |
| TSS1500 | MIR184   | 15 | 79500886/79501491/79501052                                              | 3 | cg01207916/cg23121785/cg23721598                                                        | 0.708715365 | 0.630393444 | 0.555096323 | -0.153619042 | 2.97E-09 | 3.30E-08    |
| TSS1500 | MIR187   | 18 | 33485300/33485594                                                       | 2 | cg03599197/cg16673522                                                                   | 0.705142875 | 0.602534189 | 0.514274645 | -0.19086823  | 2.92E-05 | 9.70E-05    |
| TSS1500 | MIR192   | 11 | 64659065/64659060/64658940/64659387/64660076/64658936/64658946/64659044 | 8 | cg00376448/cg00400165/cg00589493/cg02494703/cg06104877/cg08432452/cg13092487/cg24154336 | 0.549972634 | 0.458912892 | 0.384133263 | -0.165839371 | 3.28E-11 | 1.16E-09    |
| TSS1500 | MIR194-1 | 1  | 220292508/220292590                                                     | 2 | cg23617067/cg24658737                                                                   | 0.595965473 | 0.450043589 | 0.349890777 | -0.246074695 | 2.15E-11 | 8.62E-10    |
| TSS1500 | MIR194-2 | 11 | 64659387/64660076/64660386                                              | 3 | cg02494703/cg06104877/cg23266943                                                        | 0.447213755 | 0.362904281 | 0.293650795 | -0.15356296  | 6.63E-11 | 1.82E-09    |
| TSS1500 | MIR1973  | 4  | 117220363/117220469                                                     | 2 | cg23666362/cg23740016                                                                   | 0.74332074  | 0.678466014 | 0.587393198 | -0.155927542 | 2.35E-08 | 1.82E-07    |
| TSS1500 | MIR205   | 1  | 209604583/209604397/209605223/209605104/209604378                       | 5 | cg01334432/cg05922993/cg12386297/cg17860090/cg27261597                                  | 0.695530373 | 0.606375639 | 0.507846248 | -0.187684125 | 5.24E-09 | 5.23E-08    |
| TSS1500 | MIR2053  | 8  | 113655436                                                               | 1 | cg15943335                                                                              | 0.59865631  | 0.5075743   | 0.416271955 | -0.182384355 | 3.28E-05 | 0.000107778 |
| TSS1500 | MIR2113  | 6  | 98471368                                                                | 1 | cg25199591                                                                              | 0.462028045 | 0.334985306 | 0.247081214 | -0.214946831 | 6.38E-10 | 9.62E-09    |
| TSS1500 | MIR215   | 1  | 220292508/220292590                                                     | 2 | cg23617067/cg24658737                                                                   | 0.595965473 | 0.450043589 | 0.349890777 | -0.246074695 | 2.15E-11 | 8.62E-10    |
| TSS1500 | MIR216B  | 2  | 56229060                                                                | 1 | cg02071553                                                                              | 0.738162795 | 0.683389278 | 0.5301385   | -0.208024295 | 4.11E-06 | 1.67E-05    |
| TSS1500 | MIR218-2 | 5  | 168196464/168195460/168196172                                           | 3 | cg00534479/cg09887953/cg24141911                                                        | 0.66623901  | 0.527391889 | 0.415007068 | -0.251231942 | 2.77E-11 | 1.03E-09    |

|         |          |    |                                                                                                                         |    |                                                                                                                                       |             |             |             |              |             |             |
|---------|----------|----|-------------------------------------------------------------------------------------------------------------------------|----|---------------------------------------------------------------------------------------------------------------------------------------|-------------|-------------|-------------|--------------|-------------|-------------|
| TSS1500 | MIR296   | 20 | 57394000/5739384<br>4/57394097/573933 5<br>80/57393277                                                                  |    | cg03030267/cg11954<br>355/cg15428904/cg2<br>1983491/cg25188071                                                                        | 0.736996827 | 0.655026802 | 0.576379371 | -0.160617455 | 1.76E-07    | 1.05E-06    |
| TSS1500 | MIR298   | 20 | 57394000/5739384<br>4/57394097                                                                                          | 3  | cg03030267/cg11954<br>355/cg15428904                                                                                                  | 0.74324864  | 0.658549428 | 0.58082605  | -0.16242259  | 2.55E-05    | 8.58E-05    |
| TSS1500 | MIR30A   | 6  | 72114693                                                                                                                | 1  | cg16506910                                                                                                                            | 0.387141005 | 0.297486239 | 0.225188323 | -0.161952682 | 9.95E-13    | 1.45E-10    |
| TSS1500 | MIR30C2  | 6  | 72088126                                                                                                                | 1  | cg15319027                                                                                                                            | 0.73638431  | 0.646403472 | 0.585904486 | -0.150479824 | 9.70E-06    | 3.58E-05    |
| TSS1500 | MIR34C   | 11 | 111383668/111382<br>915/111383603/111<br>383288/111383576/<br>111383083/111383<br>515/111383624/111<br>383889/111383653 | 10 | cg01192900/cg03242<br>880/cg13767940/cg1<br>8515591/cg21881253<br>/cg22806002/cg2287<br>9515/cg23211240/cg<br>24041078/cg2656178<br>5 | 0.304172077 | 0.372950868 | 0.546756216 | 0.242584139  | 1.12E-06    | 5.26E-06    |
| TSS1500 | MIR376C  | 14 | 101505523/101505<br>130/101505598                                                                                       | 3  | cg01200264/cg02047<br>319/cg10268144                                                                                                  | 0.785509913 | 0.690672498 | 0.620266924 | -0.165242989 | 6.66E-11    | 1.82E-09    |
| TSS1500 | MIR377   | 14 | 101527688/101528<br>123/101528156/101<br>527046/101527144/ 7<br>101527072/101526<br>893                                 | 7  | cg03663955/cg05138<br>957/cg11721554/cg1<br>1869269/cg18588811<br>/cg20474788/cg2346<br>8699                                          | 0.735225586 | 0.633640854 | 0.572917813 | -0.162307773 | 8.99E-10    | 1.26E-08    |
| TSS1500 | MIR489   | 7  | 93114192                                                                                                                | 1  | cg04650977                                                                                                                            | 0.67619819  | 0.595550022 | 0.517460436 | -0.158737754 | 0.000281273 | 0.000752307 |
| TSS1500 | MIR494   | 14 | 101495047/101495<br>604/101495758                                                                                       | 3  | cg01131100/cg07429<br>629/cg10400174                                                                                                  | 0.817443933 | 0.760106092 | 0.645709443 | -0.171734489 | 9.20E-07    | 4.44E-06    |
| TSS1500 | MIR518A2 | 19 | 54242243/5424212<br>4/54241421                                                                                          | 3  | cg02336334/cg09430<br>586/cg22468497                                                                                                  | 0.729264248 | 0.645512458 | 0.575922323 | -0.153341925 | 9.01E-09    | 8.11E-08    |
| TSS1500 | MIR541   | 14 | 101530580/101530<br>343/101529855/101 4<br>530537                                                                       | 4  | cg03050096/cg04235<br>416/cg04638655/cg0<br>7126399                                                                                   | 0.632969792 | 0.525123398 | 0.44402917  | -0.188940622 | 4.13E-09    | 4.32E-08    |
| TSS1500 | MIR548A1 | 6  | 18571548                                                                                                                | 1  | cg03000711                                                                                                                            | 0.719775305 | 0.63767465  | 0.515342773 | -0.204432532 | 1.95E-05    | 6.73E-05    |
| TSS1500 | MIR548D2 | 1  | 58333307/5833286<br>2                                                                                                   | 2  | cg00944580/cg18642<br>361                                                                                                             | 0.48692311  | 0.372359772 | 0.301802393 | -0.185120717 | 4.87E-12    | 3.60E-10    |
| TSS1500 | MIR548F2 | 2  | 213292541                                                                                                               | 1  | cg20953052                                                                                                                            | 0.42382712  | 0.354604533 | 0.232070873 | -0.191756247 | 2.21E-09    | 2.58E-08    |
| TSS1500 | MIR548I4 | 7  | 147256123/147256<br>263/147256367                                                                                       | 3  | cg02515354/cg07299<br>645/cg16341266                                                                                                  | 0.74525388  | 0.650377206 | 0.574960491 | -0.170293389 | 2.17E-13    | 7.10E-11    |
| TSS1500 | MIR551A  | 1  | 3478216/3477690/3<br>478767/3477695                                                                                     | 4  | cg01432902/cg07830<br>126/cg12427039/cg2<br>4536161                                                                                   | 0.696001913 | 0.582556053 | 0.492431661 | -0.203570251 | 4.48E-11    | 1.44E-09    |

|         |           |    |                                                                                                                         |    |                                                                                                                                     |             |             |             |              |             |             |
|---------|-----------|----|-------------------------------------------------------------------------------------------------------------------------|----|-------------------------------------------------------------------------------------------------------------------------------------|-------------|-------------|-------------|--------------|-------------|-------------|
| TSS1500 | MIR551B   | 3  | 168268757/168268421                                                                                                     | 2  | cg07747690/cg21490751                                                                                                               | 0.730831    | 0.636815628 | 0.535881484 | -0.194949516 | 3.78E-07    | 2.04E-06    |
| TSS1500 | MIR620    | 12 | 116586898/116586872/116587387                                                                                           | 3  | cg09230679/cg18087803/cg19685229                                                                                                    | 0.655619202 | 0.556600363 | 0.505465965 | -0.150153237 | 1.27E-12    | 1.65E-10    |
| TSS1500 | MIR663    | 20 | 26189510/26190328/26190354/26189665/26189240/26190347                                                                   | 6  | cg01860778/cg04150495/cg10715092/cg1220245/cg14345012/cg20395967                                                                    | 0.452555565 | 0.509105472 | 0.611950982 | 0.159395417  | 4.83E-11    | 1.51E-09    |
| TSS1500 | MIR708    | 11 | 79114457/79114296/79114133                                                                                              | 3  | cg04726985/cg17233829/cg25837979                                                                                                    | 0.777650382 | 0.674587989 | 0.598956709 | -0.178693673 | 1.01E-08    | 8.92E-08    |
| TSS1500 | MIR920    | 12 | 24365132                                                                                                                | 1  | cg07739398                                                                                                                          | 0.854453365 | 0.779061706 | 0.698192582 | -0.156260783 | 0.000203914 | 0.000561549 |
| TSS1500 | MIRLET7A2 | 11 | 122018517/122018662                                                                                                     | 2  | cg06811361/cg18590130                                                                                                               | 0.634759205 | 0.531353511 | 0.417370495 | -0.21738871  | 2.78E-10    | 5.16E-09    |
| TSS1500 | MKX       | 10 | 28035631/28035655/28035208/2803584/28035894/28035731/28035157/28036151/28035719/28035822                                | 10 | cg02161900/cg02249292/cg05381746/cg05485137/cg07964848/cg08815081/cg09713234/cg14947429/cg17918002/cg27303223                       | 0.295523692 | 0.367885474 | 0.494327492 | 0.198803801  | 1.62E-07    | 9.76E-07    |
| TSS1500 | MMADHC    | 2  | 150444762/150444834/150444569                                                                                           | 3  | cg00486525/cg07483086/cg11713727                                                                                                    | 0.565267658 | 0.511713652 | 0.394917624 | -0.170350034 | 1.25E-07    | 7.74E-07    |
| TSS1500 | MMD2      | 7  | 5000111/5000219                                                                                                         | 2  | cg02276823/cg25523580                                                                                                               | 0.674385015 | 0.575368811 | 0.514176527 | -0.160208488 | 2.33E-05    | 7.93E-05    |
| TSS1500 | MME       | 3  | 154797349/154797867/154797508/154797083/154797399/154797592/154797589/154797563/154797677/154797779/154796861/154796701 | 12 | cg00992239/cg02108850/cg03648334/cg07862554/cg08085954/cg14750844/cg16580737/cg17344755/cg21496658/cg22471230/cg23273897/cg24033859 | 0.177400593 | 0.220188435 | 0.340930097 | 0.163529505  | 0.000893848 | 0.002157744 |
| TSS1500 | MMP16     | 8  | 89340750/89340069/89341103/89340205/89340139/89340331/89340480                                                          | 7  | cg01673994/cg05033271/cg07609388/cg08397978/cg12818557/cg14644752/cg24456365                                                        | 0.327120406 | 0.40430779  | 0.575818649 | 0.248698243  | 3.14E-07    | 1.74E-06    |
| TSS1500 | MMP2      | 16 | 55512870/55514470/55514269/55512806/55514378/55512822/55512868                                                          | 7  | cg01821058/cg02458945/cg07582157/cg08318842/cg09350341/cg09530163/cg12317456                                                        | 0.231178489 | 0.283300107 | 0.390696867 | 0.159518378  | 1.50E-05    | 5.32E-05    |

|         |         |    |                                                                                                                                                                                 |    |                                                                                                                                                                                                                                                   |             |             |             |              |          |          |
|---------|---------|----|---------------------------------------------------------------------------------------------------------------------------------------------------------------------------------|----|---------------------------------------------------------------------------------------------------------------------------------------------------------------------------------------------------------------------------------------------------|-------------|-------------|-------------|--------------|----------|----------|
| TSS1500 | MNDA    | 1  | 158800024/158799935                                                                                                                                                             | 2  | cg05304729/cg25119415                                                                                                                                                                                                                             | 0.52524288  | 0.405687272 | 0.305605705 | -0.219637175 | 4.17E-12 | 3.36E-10 |
| TSS1500 | MOXD2   | 7  | 141947168/141947898/141947347                                                                                                                                                   | 3  | cg02814416/cg03129645/cg06058073                                                                                                                                                                                                                  | 0.685689607 | 0.604163709 | 0.518270926 | -0.167418681 | 1.01E-07 | 6.41E-07 |
| TSS1500 | MRGPRD  | 11 | 68748907/68749124                                                                                                                                                               | 2  | cg11903239/cg20791323                                                                                                                                                                                                                             | 0.62277544  | 0.443668222 | 0.358181995 | -0.264593445 | 3.35E-09 | 3.62E-08 |
| TSS1500 | MRGPRX2 | 11 | 19083542/19082514                                                                                                                                                               | 2  | cg10422455/cg13062935                                                                                                                                                                                                                             | 0.531498233 | 0.433999244 | 0.327454177 | -0.204044055 | 6.16E-13 | 1.07E-10 |
| TSS1500 | MRGPRX4 | 11 | 18193422/18193674/18193360                                                                                                                                                      | 3  | cg02608124/cg09691574/cg16446783                                                                                                                                                                                                                  | 0.638002827 | 0.548582467 | 0.458618794 | -0.179384033 | 1.26E-10 | 2.89E-09 |
| TSS1500 | MRPL3   | 3  | 131222041/131222106                                                                                                                                                             | 2  | cg12405775/cg20894410                                                                                                                                                                                                                             | 0.523065455 | 0.378796017 | 0.291372573 | -0.231692882 | 2.33E-13 | 7.11E-11 |
| TSS1500 | MRPL34  | 19 | 17414977/17415626/17415155                                                                                                                                                      | 3  | cg01445659/cg08702612/cg17328880                                                                                                                                                                                                                  | 0.544542253 | 0.449392267 | 0.385518386 | -0.159023866 | 8.16E-12 | 4.90E-10 |
| TSS1500 | MRPL4   | 19 | 10362061/10361286                                                                                                                                                               | 2  | cg01409448/cg12507788                                                                                                                                                                                                                             | 0.592785645 | 0.472625761 | 0.374090207 | -0.218695438 | 1.65E-11 | 7.34E-10 |
| TSS1500 | MS4A4A  | 11 | 60049447/60049475/60049097/60047483/60046908                                                                                                                                    | 5  | cg01229998/cg12604169/cg16954525/cg23754934/cg27008678                                                                                                                                                                                            | 0.657691098 | 0.566088192 | 0.478658109 | -0.179032988 | 4.45E-09 | 4.58E-08 |
| TSS1500 | MS4A5   | 11 | 60196790/60195729/60196778                                                                                                                                                      | 3  | cg00534700/cg04382783/cg17630127                                                                                                                                                                                                                  | 0.73209927  | 0.604259689 | 0.541099527 | -0.190999743 | 1.84E-05 | 6.41E-05 |
| TSS1500 | MSGN1   | 2  | 17997138/17996994/17997117                                                                                                                                                      | 3  | cg03377767/cg22762189/cg26632171                                                                                                                                                                                                                  | 0.496319117 | 0.403741398 | 0.345607421 | -0.150711695 | 3.46E-09 | 3.71E-08 |
| TSS1500 | MSX1    | 4  | 4860026/4860431/4860468/4860655/4860551/4859975/4859985/4861122/4861101/4860082/4860617/4860190/4859996/4860061/4861183/4860698/4859935/4859960/4860439/4860547/4860590/4860157 | 22 | cg00486340/cg03335246/cg03672274/cg04100843/cg04660422/cg07035659/cg07462756/cg08121252/cg09918082/cg10266211/cg11566977/cg13207326/cg13882284/cg15092343/cg15696627/cg17938612/cg18849102/cg19846622/cg20588069/cg21689228/cg22371591/cg24469464 | 0.356029471 | 0.422432098 | 0.549218078 | 0.193188607  | 1.83E-09 | 2.22E-08 |
| TSS1500 | MTIF2   | 2  | 55496552/55497012                                                                                                                                                               | 2  | cg05986680/cg27478579                                                                                                                                                                                                                             | 0.627054505 | 0.4972025   | 0.404546427 | -0.222508078 | 4.77E-12 | 3.58E-10 |
| TSS1500 | MTMR6   | 13 | 25862332/25862639/25862438                                                                                                                                                      | 3  | cg13555116/cg15071391/cg24801023                                                                                                                                                                                                                  | 0.68594255  | 0.639700797 | 0.503333325 | -0.182609225 | 1.51E-08 | 1.25E-07 |

|         |           |    |                                                                                       |                                                                                              |             |             |             |              |          |             |
|---------|-----------|----|---------------------------------------------------------------------------------------|----------------------------------------------------------------------------------------------|-------------|-------------|-------------|--------------|----------|-------------|
| TSS1500 | MTMR9     | 8  | 11141680/1114141<br>5/11141424/111413 4<br>65                                         | cg03034634/cg08623<br>223/cg21337580/cg2<br>4378421                                          | 0.346501575 | 0.405252514 | 0.498643881 | 0.152142307  | 5.46E-05 | 0.000170176 |
| TSS1500 | MTUS2     | 13 | 30002334/3000247<br>5/29597447/300024 5<br>71/29597851                                | cg03989020/cg06472<br>554/cg07790085/cg1<br>6315060/cg23509128                               | 0.486457913 | 0.397255731 | 0.286765231 | -0.199692681 | 3.25E-08 | 2.40E-07    |
| TSS1500 | MTVR2     | 17 | 54962555/5496281<br>2                                                                 | cg14039347/cg25273<br>584                                                                    | 0.63381135  | 0.523852786 | 0.436492609 | -0.197318741 | 1.48E-08 | 1.23E-07    |
| TSS1500 | MUC13     | 3  | 124654885                                                                             | cg14497879                                                                                   | 0.62254475  | 0.46971605  | 0.371612186 | -0.250932564 | 1.43E-10 | 3.13E-09    |
| TSS1500 | MUC16     | 19 | 9093098/9093198                                                                       | cg05222216/cg15811<br>371                                                                    | 0.60867806  | 0.529651506 | 0.458486075 | -0.150191985 | 3.19E-07 | 1.76E-06    |
| TSS1500 | MUSK      | 9  | 113430005                                                                             | cg01737465                                                                                   | 0.782561555 | 0.74197165  | 0.588620055 | -0.1939415   | 3.28E-05 | 0.000107802 |
| TSS1500 | MYCT1     | 6  | 153018721                                                                             | cg02830467                                                                                   | 0.61936345  | 0.468785022 | 0.323156964 | -0.296206486 | 1.12E-09 | 1.51E-08    |
| TSS1500 | MYEOV     | 11 | 69061344/6906054<br>2/69061244                                                        | cg01638792/cg13213<br>814/cg26548122                                                         | 0.755805578 | 0.664958744 | 0.594016741 | -0.161788837 | 6.23E-08 | 4.20E-07    |
| TSS1500 | MYF6      | 12 | 81100403/8110102<br>2/81100305                                                        | cg08352786/cg15166<br>296/cg25178519                                                         | 0.73796728  | 0.631542031 | 0.566700609 | -0.171266671 | 2.17E-10 | 4.29E-09    |
| TSS1500 | MYH14     | 19 | 50705432/5070638<br>7/50706483/507065 5<br>36/50706577                                | cg00919509/cg03344<br>031/cg06182329/cg1<br>1558731/cg25311666                               | 0.438303566 | 0.309824556 | 0.287559616 | -0.15074395  | 1.51E-09 | 1.91E-08    |
| TSS1500 | MYH15     | 3  | 108249446                                                                             | cg03110703                                                                                   | 0.696281105 | 0.566756444 | 0.432034318 | -0.264246787 | 1.58E-09 | 1.97E-08    |
| TSS1500 | MYL1      | 2  | 211168547/211180<br>386/211169638                                                     | cg13027933/cg22904<br>096/cg27305342                                                         | 0.653161028 | 0.569141898 | 0.484481033 | -0.168679995 | 1.21E-06 | 5.62E-06    |
| TSS1500 | MYOD1     | 11 | 17740887/1774043<br>0                                                                 | cg04499648/cg24322<br>623                                                                    | 0.214798545 | 0.300851656 | 0.403722645 | 0.1889241    | 6.94E-06 | 2.65E-05    |
| TSS1500 | NALCN     | 13 | 102069132/102069<br>251/102069556/102<br>069296/102069169/<br>102069257               | cg01105058/cg04117<br>435/cg11147919/cg1<br>1621911/cg18115507<br>/cg18686498                | 0.247045602 | 0.313659702 | 0.445308149 | 0.198262547  | 3.62E-05 | 0.000117555 |
| TSS1500 | NAPEPLD   | 7  | 102790168/102790<br>119/102789948/102 5<br>790406/102790112                           | cg08159594/cg08904<br>363/cg08905662/cg1<br>1692070/cg19273773                               | 0.54446077  | 0.418115428 | 0.306560248 | -0.237900522 | 3.94E-13 | 8.13E-11    |
| TSS1500 | NAT2      | 8  | 18248453                                                                              | cg14494313                                                                                   | 0.549401215 | 0.413995506 | 0.327277118 | -0.222124097 | 4.54E-12 | 3.51E-10    |
| TSS1500 | NBLA00301 | 4  | 174451398/174451<br>251/174450722/174<br>450353/174450408/<br>174451394/174451<br>141 | cg00443971/cg02774<br>439/cg10541864/cg1<br>5707093/cg19178853<br>/cg21530280/cg2510<br>2370 | 0.237734421 | 0.310234254 | 0.429972749 | 0.192238328  | 4.57E-06 | 1.83E-05    |

|         |            |    |                                                                                                                                              |    |                                                                                                                                                                            |             |             |             |              |          |             |
|---------|------------|----|----------------------------------------------------------------------------------------------------------------------------------------------|----|----------------------------------------------------------------------------------------------------------------------------------------------------------------------------|-------------|-------------|-------------|--------------|----------|-------------|
| TSS1500 | NCAM2      | 21 | 22370347/2236948<br>5/22370237/223699<br>08/22369802/22370<br>046/22369310                                                                   | 7  | cg12426234/cg13062<br>913/cg13297960/cg1<br>8128969/cg18492126<br>/cg19556343/cg2116<br>0372                                                                               | 0.398778226 | 0.47196108  | 0.55456889  | 0.155790665  | 2.73E-07 | 1.54E-06    |
| TSS1500 | NCR3       | 6  | 31561515/3156173<br>2                                                                                                                        | 2  | cg03686228/cg15311<br>651                                                                                                                                                  | 0.862665245 | 0.79043275  | 0.7108108   | -0.151854445 | 1.93E-07 | 1.14E-06    |
| TSS1500 | NCRNA00052 | 15 | 88119834/8811953<br>9                                                                                                                        | 2  | cg04579183/cg13382<br>840                                                                                                                                                  | 0.785534115 | 0.722269833 | 0.589440864 | -0.196093251 | 4.38E-05 | 0.000139819 |
| TSS1500 | NCRNA00093 | 10 | 101686538/101686<br>326                                                                                                                      | 2  | cg10727259/cg27434<br>467                                                                                                                                                  | 0.45689218  | 0.351860589 | 0.274728473 | -0.182163707 | 1.39E-10 | 3.08E-09    |
| TSS1500 | NCRNA00157 | 21 | 19258310                                                                                                                                     | 1  | cg26060835                                                                                                                                                                 | 0.500227875 | 0.346046228 | 0.238001077 | -0.262226798 | 4.12E-15 | 1.30E-11    |
| TSS1500 | NCRNA00161 | 21 | 29910762/2991041<br>1                                                                                                                        | 2  | cg24617741/cg25912<br>938                                                                                                                                                  | 0.785438628 | 0.714075372 | 0.618457255 | -0.166981373 | 3.20E-08 | 2.37E-07    |
| TSS1500 | NCRNA00162 | 21 | 46424976/4642488<br>0/46424860                                                                                                               | 3  | cg07073072/cg13136<br>556/cg17843722                                                                                                                                       | 0.465455965 | 0.376709767 | 0.308664117 | -0.156791848 | 1.05E-11 | 5.47E-10    |
| TSS1500 | NDRG4      | 16 | 58497236/5849815<br>1/58497395/584978<br>15/58497230/58498<br>190/58497239/5849<br>8456/58498534/584<br>97801/58497714/58<br>497767/58496542 | 13 | cg00687686/cg00984<br>694/cg01466678/cg0<br>2040433/cg04190807<br>/cg04797985/cg0494<br>2472/cg05469759/cg<br>08384171/cg0879113<br>1/cg11306587/cg130<br>31432/cg27147718 | 0.145856594 | 0.232042654 | 0.31887565  | 0.173019056  | 5.98E-05 | 0.000184782 |
| TSS1500 | NEFH       | 22 | 29875592/2987557<br>8/29875947/298757<br>84                                                                                                  | 4  | cg01907106/cg09828<br>714/cg16042149/cg2<br>2766080                                                                                                                        | 0.502167125 | 0.540143189 | 0.658142485 | 0.15597536   | 1.35E-06 | 6.17E-06    |
| TSS1500 | NEFM       | 8  | 24772137/2477164<br>5/24771259/247713<br>26/24771114/24771<br>125/24771273/2477<br>0381/24771466/247<br>70342                                | 10 | cg02106941/cg02761<br>376/cg07502389/cg0<br>7552803/cg09234518<br>/cg16459364/cg1826<br>7374/cg18898125/cg<br>23290344/cg2633051<br>8                                      | 0.404633198 | 0.469540744 | 0.599201504 | 0.194568306  | 5.20E-09 | 5.20E-08    |
| TSS1500 | NEK3       | 13 | 52734432/5273401<br>8/52734154/527340<br>32/52734071/52733<br>860/52735075/5273<br>4134                                                      | 8  | cg00595898/cg01345<br>727/cg06906869/cg1<br>2277225/cg12861503<br>/cg14572307/cg1952<br>4009/cg27065979                                                                    | 0.660014018 | 0.54014406  | 0.461945924 | -0.198068094 | 1.82E-11 | 7.71E-10    |

|         |          |    |                                                                           |                                                                               |             |             |             |              |             |             |
|---------|----------|----|---------------------------------------------------------------------------|-------------------------------------------------------------------------------|-------------|-------------|-------------|--------------|-------------|-------------|
| TSS1500 | NELL1    | 11 | 20690807/2069068<br>2/20690223/206907 5<br>20/20690628                    | cg02510267/cg06873<br>316/cg10964385/cg1<br>4749465/cg22769941                | 0.311200314 | 0.395912428 | 0.53861594  | 0.227415626  | 3.48E-08    | 2.55E-07    |
| TSS1500 | NENF     | 1  | 212605266/212605<br>929/212604918/212 4<br>605702                         | cg02783662/cg02901<br>139/cg10487521/cg1<br>1836829                           | 0.45540438  | 0.370738194 | 0.295411301 | -0.159993079 | 1.81E-10    | 3.75E-09    |
| TSS1500 | NETO1    | 18 | 70534316/7053533<br>6/70535925/705341 6<br>10/70534298/70535 6<br>406     | cg03524083/cg12921<br>750/cg21922574/cg2<br>3505303/cg23883696<br>/cg24863335 | 0.392586818 | 0.480920291 | 0.592840855 | 0.200254037  | 3.85E-11    | 1.30E-09    |
| TSS1500 | NF1P1    | 15 | 21135690/2113567 2<br>5                                                   | cg03606214/cg18714<br>358                                                     | 0.543297948 | 0.442067992 | 0.329205445 | -0.214092502 | 2.42E-12    | 2.44E-10    |
| TSS1500 | NHLRC1   | 6  | 18123224/1812316 3<br>4/18123232                                          | cg06646708/cg18068<br>140/cg18232313                                          | 0.66611549  | 0.53489405  | 0.475232498 | -0.190882992 | 4.02E-06    | 1.63E-05    |
| TSS1500 | NHP2     | 5  | 177581512/177581<br>506/177581603/177 6<br>581310/177581713/<br>177581771 | cg00273124/cg05654<br>329/cg07869651/cg0<br>8525345/cg12634840<br>/cg24546426 | 0.624976474 | 0.526433708 | 0.422183344 | -0.202793129 | 5.55E-12    | 3.92E-10    |
| TSS1500 | NINJ2    | 12 | 772966/772982/773 3<br>616                                                | cg15884713/cg25089<br>903/cg26549831                                          | 0.751122928 | 0.646556548 | 0.571294258 | -0.179828671 | 7.18E-11    | 1.92E-09    |
| TSS1500 | NIPAL2   | 8  | 99306953/9930687 2<br>0                                                   | cg00330789/cg09965<br>939                                                     | 0.39312997  | 0.309941272 | 0.241287105 | -0.151842865 | 3.10E-12    | 2.81E-10    |
| TSS1500 | NIPSNAP1 | 22 | 29977949/2997767<br>7/29978158/299777 4<br>42                             | cg00266865/cg00939<br>432/cg08492625/cg1<br>3797031                           | 0.692148885 | 0.533068886 | 0.442208673 | -0.249940212 | 4.64E-12    | 3.51E-10    |
| TSS1500 | NKAIN2   | 6  | 124124620/124124<br>275/124123931/124 5<br>123898/124123960               | cg04856292/cg05343<br>073/cg12851429/cg1<br>8457076/cg22375674                | 0.109640991 | 0.171199606 | 0.279320977 | 0.169679986  | 0.000370132 | 0.000967074 |
| TSS1500 | NKAIN4   | 20 | 61886262/6188614<br>2/61886587/618863 4<br>13                             | cg07675169/cg07986<br>239/cg13657510/cg1<br>4877226                           | 0.273636822 | 0.401481094 | 0.550131777 | 0.276494955  | 5.59E-07    | 2.87E-06    |
| TSS1500 | NKAPL    | 6  | 28226203/2822688 3<br>5/28226094                                          | cg00482232/cg21251<br>018/cg26881102                                          | 0.787481103 | 0.701836978 | 0.584997023 | -0.20248408  | 2.96E-09    | 3.29E-08    |
| TSS1500 | NKX2-6   | 8  | 23565098/2356415<br>6/23564591/235642 6<br>94/23564717/23564 6<br>193     | cg03495753/cg03694<br>713/cg03749016/cg1<br>0603004/cg16544169<br>/cg22747746 | 0.412060697 | 0.527145658 | 0.654465984 | 0.242405287  | 9.66E-11    | 2.39E-09    |
| TSS1500 | NLRP11   | 19 | 56349119/5634874 3<br>2/56348889                                          | cg02345758/cg02861<br>926/cg22747516                                          | 0.425095376 | 0.329939112 | 0.264604368 | -0.160491008 | 1.51E-08    | 1.25E-07    |



|         |        |    |                                                                                       |   |                                                                                              |             |             |             |              |             |             |
|---------|--------|----|---------------------------------------------------------------------------------------|---|----------------------------------------------------------------------------------------------|-------------|-------------|-------------|--------------|-------------|-------------|
| TSS1500 | NMBR   | 6  | 142410216/142410<br>235/142410221                                                     | 3 | cg13202845/cg18425<br>786/cg21460020                                                         | 0.342598663 | 0.382262107 | 0.546260842 | 0.203662179  | 1.03E-06    | 4.91E-06    |
| TSS1500 | NOL12  | 22 | 38081176/3808210<br>8/38081493                                                        | 3 | cg14370507/cg14398<br>464/cg22123728                                                         | 0.57919944  | 0.473608478 | 0.386252334 | -0.192947106 | 1.03E-10    | 2.49E-09    |
| TSS1500 | NOTCH4 | 6  | 32192510/3219310<br>7/32193235/321923<br>50                                           | 4 | cg02662596/cg03250<br>947/cg07010337/cg0<br>7822788                                          | 0.70264848  | 0.609518224 | 0.506467755 | -0.196180725 | 1.42E-08    | 1.19E-07    |
| TSS1500 | NOV    | 8  | 120428057/120427<br>810                                                               | 2 | cg05020510/cg15718<br>811                                                                    | 0.42107289  | 0.345437442 | 0.268170941 | -0.152901949 | 1.38E-10    | 3.07E-09    |
| TSS1500 | NOVA1  | 14 | 27067707/2706789<br>5/27068354/270680<br>93/27067638/27067<br>372/27068135            | 7 | cg02014003/cg07543<br>626/cg11146971/cg1<br>6791424/cg18468511<br>/cg20478129/cg2350<br>2778 | 0.274856558 | 0.292430327 | 0.457206281 | 0.182349723  | 3.85E-05    | 0.000124268 |
| TSS1500 | NPAS4  | 11 | 66188019/6618820<br>3/66187533                                                        | 3 | cg02055483/cg09835<br>239/cg24435401                                                         | 0.218762555 | 0.328106943 | 0.536197375 | 0.317434821  | 4.56E-09    | 4.68E-08    |
| TSS1500 | NPBWR1 | 8  | 53852101/5385161<br>3/53852184/538520<br>30/53851707/53851<br>156                     | 6 | cg02115041/cg07629<br>017/cg15531403/cg1<br>6330450/cg24857620<br>/cg26205771                | 0.253709521 | 0.413337796 | 0.606035915 | 0.352326394  | 1.62E-10    | 3.43E-09    |
| TSS1500 | NPHP1  | 2  | 110963774                                                                             | 1 | cg25350097                                                                                   | 0.760918895 | 0.700804217 | 0.554123123 | -0.206795772 | 4.80E-06    | 1.91E-05    |
| TSS1500 | NPHS1  | 19 | 36343530/3634429<br>3/36343521                                                        | 3 | cg14327228/cg19519<br>626/cg21459969                                                         | 0.6956954   | 0.612915528 | 0.524694682 | -0.171000718 | 0.000342403 | 0.00090075  |
| TSS1500 | NPS    | 10 | 129346680/129346<br>391                                                               | 2 | cg02304033/cg09640<br>621                                                                    | 0.57664421  | 0.469273547 | 0.363227489 | -0.213416721 | 1.41E-10    | 3.10E-09    |
| TSS1500 | NPTX1  | 17 | 78451573/7845085<br>5/78451349/784515<br>63                                           | 4 | cg13391810/cg17775<br>235/cg19177795/cg2<br>5924217                                          | 0.137769768 | 0.176656147 | 0.325586605 | 0.187816837  | 0.00014822  | 0.000419812 |
| TSS1500 | NPTX2  | 7  | 98245830/9824600<br>6/98245716/982460<br>01                                           | 4 | cg00548268/cg08315<br>202/cg09596818/cg1<br>3314145                                          | 0.416650292 | 0.435665248 | 0.592178547 | 0.175528255  | 0.000281576 | 0.000753013 |
| TSS1500 | NPY    | 7  | 24323128/2432355<br>9/24323261                                                        | 3 | cg01050885/cg05158<br>615/cg18106668                                                         | 0.349575665 | 0.509746457 | 0.621323027 | 0.271747362  | 1.18E-10    | 2.76E-09    |
| TSS1500 | NPY2R  | 4  | 156128904/156129<br>574/156129169/156<br>129081/156129424                             | 5 | cg00954382/cg06812<br>991/cg07121547/cg0<br>7707546/cg18930994                               | 0.230257255 | 0.30646618  | 0.417696499 | 0.187439244  | 5.36E-06    | 2.10E-05    |
| TSS1500 | NR2E1  | 6  | 108486517/108486<br>387/108486450/108<br>486773/108486123/<br>108485837/108486<br>007 | 7 | cg03950614/cg03958<br>979/cg08640634/cg1<br>2463600/cg18710462<br>/cg20652607/cg2123<br>9311 | 0.325656174 | 0.404558707 | 0.563828238 | 0.238172064  | 1.26E-08    | 1.08E-07    |

|         |         |    |                                                                                                               |    |                                                                                                                                       |             |             |             |              |             |            |
|---------|---------|----|---------------------------------------------------------------------------------------------------------------|----|---------------------------------------------------------------------------------------------------------------------------------------|-------------|-------------|-------------|--------------|-------------|------------|
| TSS1500 | NR2E3   | 15 | 72101672/7210221<br>3/72101891                                                                                | 3  | cg04664328/cg07931<br>844/cg16586105                                                                                                  | 0.510809095 | 0.406143444 | 0.324469854 | -0.186339241 | 1.05E-13    | 4.63E-11   |
| TSS1500 | NRBF2   | 10 | 64892616/6489267<br>3/64892741                                                                                | 3  | cg05393736/cg13216<br>112/cg23221090                                                                                                  | 0.747390067 | 0.6172161   | 0.504231647 | -0.24315842  | 1.19E-11    | 5.86E-10   |
| TSS1500 | NRG3    | 10 | 83634485/8363678<br>2/83636325/836366<br>76/83636127/83633<br>980/83634276/8363<br>6072/83636249/836<br>33679 | 10 | cg01151966/cg01164<br>344/cg02100674/cg0<br>3480666/cg05087983<br>/cg07023791/cg1040<br>1879/cg18988560/cg<br>22928016/cg2325596<br>3 | 0.193393267 | 0.234592236 | 0.357821913 | 0.164428646  | 5.51E-08    | 3.78E-07   |
| TSS1500 | NRXN1   | 2  | 51260399/5057532<br>4/50575326/505750<br>98/51260003/51260<br>739                                             | 6  | cg00345522/cg02495<br>518/cg04707706/cg0<br>7529754/cg13999106<br>/cg23273041                                                         | 0.445478344 | 0.512897301 | 0.597293583 | 0.151815239  | 1.49E-06    | 6.76E-06   |
| TSS1500 | NSMCE4A | 10 | 123735128                                                                                                     | 1  | cg09536375                                                                                                                            | 0.52175561  | 0.452216628 | 0.327232327 | -0.194523283 | 3.36E-09    | 3.63E-08   |
| TSS1500 | NTRK3   | 15 | 88799973/8880051<br>0/88800567/887999<br>99/88801004/88800<br>624                                             | 6  | cg04627496/cg04920<br>689/cg05901579/cg0<br>7252731/cg11108676<br>/cg14384532                                                         | 0.170978061 | 0.318451373 | 0.507354069 | 0.336376008  | 2.28E-08    | 1.78E-07   |
| TSS1500 | NTSR1   | 20 | 61339804/6133987<br>1/61339875                                                                                | 3  | cg02658437/cg03567<br>830/cg11877251                                                                                                  | 0.172778239 | 0.226102439 | 0.338334882 | 0.165556643  | 0.000374719 | 0.00097825 |
| TSS1500 | NUB1    | 7  | 151037549/151038<br>446/151038594/151<br>037527                                                               | 4  | cg02217041/cg03480<br>605/cg19553910/cg2<br>1639188                                                                                   | 0.508299146 | 0.445958303 | 0.348054188 | -0.160244959 | 4.67E-09    | 4.78E-08   |
| TSS1500 | OAS1    | 12 | 113343409/113343<br>413/113343603                                                                             | 3  | cg09151598/cg17445<br>535/cg25668626                                                                                                  | 0.605758568 | 0.486313428 | 0.39123885  | -0.214519718 | 1.15E-11    | 5.74E-10   |
| TSS1500 | OC90    | 8  | 133072665/133072<br>043/133072873/133<br>072269                                                               | 4  | cg02759725/cg21594<br>839/cg23399286/cg2<br>5626375                                                                                   | 0.493540953 | 0.339717638 | 0.227361109 | -0.266179843 | 3.41E-16    | 3.24E-12   |
| TSS1500 | OCEL1   | 19 | 17336525/1733646<br>7/17336377                                                                                | 3  | cg00003818/cg19461<br>907/cg25689649                                                                                                  | 0.532605983 | 0.424502522 | 0.341566345 | -0.191039637 | 2.68E-12    | 2.65E-10   |
| TSS1500 | OCLN    | 5  | 68787760/6878769<br>6/68787747                                                                                | 3  | cg17772163/cg17818<br>912/cg21126626                                                                                                  | 0.490919378 | 0.410403022 | 0.318510425 | -0.172408953 | 6.94E-09    | 6.50E-08   |
| TSS1500 | OCM2    | 7  | 97620915/9762012<br>3/97620777                                                                                | 3  | cg12844913/cg14260<br>458/cg26262988                                                                                                  | 0.470654058 | 0.380728544 | 0.282407012 | -0.188247046 | 2.96E-12    | 2.76E-10   |
| TSS1500 | ODF3    | 11 | 195572/195323/195<br>390                                                                                      | 3  | cg10335112/cg13470<br>155/cg26190363                                                                                                  | 0.586654625 | 0.475777517 | 0.377634736 | -0.209019889 | 1.36E-10    | 3.03E-09   |

|         |         |    |                                                                |   |                                                                              |             |             |             |              |             |             |
|---------|---------|----|----------------------------------------------------------------|---|------------------------------------------------------------------------------|-------------|-------------|-------------|--------------|-------------|-------------|
| TSS1500 | ODZ2    | 5  | 166710846/166711594/166710712                                  | 3 | cg01227558/cg09171112/cg12659981                                             | 0.582959705 | 0.508615989 | 0.389516866 | -0.193442839 | 4.08E-08    | 2.92E-07    |
| TSS1500 | ODZ4    | 11 | 79152969/79152112/79152102/79152821/79151966                   | 5 | cg00908927/cg02409108/cg12246510/cg22782986/cg25965355                       | 0.256022576 | 0.344062704 | 0.483050142 | 0.227027566  | 3.78E-07    | 2.04E-06    |
| TSS1500 | OLFM1   | 9  | 137966584/137966498                                            | 2 | cg08268099/cg21222830                                                        | 0.54100499  | 0.456826472 | 0.384505495 | -0.156499495 | 6.08E-08    | 4.12E-07    |
| TSS1500 | OLFM4   | 13 | 53602266/53602385/53601944                                     | 3 | cg01098981/cg08119452/cg10246520                                             | 0.593189043 | 0.44778     | 0.39081028  | -0.202378763 | 1.93E-09    | 2.32E-08    |
| TSS1500 | OLIG2   | 21 | 34396986/34396944/34397784/34397135/34397654                   | 5 | cg07601542/cg08729810/cg10217445/cg16713743/cg22593533                       | 0.293543595 | 0.340770936 | 0.448347443 | 0.154803848  | 3.07E-06    | 1.28E-05    |
| TSS1500 | OLIG3   | 6  | 137816623/137817008/137816620/137816475/137816901              | 5 | cg01889237/cg02799448/cg15324651/cg20336981/cg26672688                       | 0.213087572 | 0.254771144 | 0.373065908 | 0.159978336  | 1.51E-07    | 9.18E-07    |
| TSS1500 | ONECUT1 | 15 | 53083238/53082477/53083587/53083532/53082902/53083518/53083135 | 7 | cg01196531/cg02061705/cg06657050/cg13877670/cg15628498/cg20056542/cg26158897 | 0.294836457 | 0.431906515 | 0.589879428 | 0.295042971  | 8.67E-11    | 2.20E-09    |
| TSS1500 | OPRK1   | 8  | 54164757/54164442/54165371                                     | 3 | cg01281904/cg09816500/cg20336122                                             | 0.275814    | 0.379214372 | 0.510390523 | 0.234576523  | 9.02E-06    | 3.36E-05    |
| TSS1500 | OR10A4  | 11 | 6897491/6896603                                                | 2 | cg03898365/cg15375826                                                        | 0.38460844  | 0.280502089 | 0.2197564   | -0.16485204  | 1.00E-07    | 6.35E-07    |
| TSS1500 | OR10A7  | 12 | 55613318                                                       | 1 | cg26442740                                                                   | 0.702508535 | 0.621660633 | 0.458238027 | -0.244270508 | 1.99E-06    | 8.76E-06    |
| TSS1500 | OR10AG1 | 11 | 55736968/55737045/55737072                                     | 3 | cg05343512/cg18099058/cg22724854                                             | 0.610757173 | 0.492530581 | 0.388895602 | -0.221861572 | 2.31E-12    | 2.35E-10    |
| TSS1500 | OR10J1  | 1  | 159409207/159408079                                            | 2 | cg15700197/cg23689219                                                        | 0.660124183 | 0.513700247 | 0.359709559 | -0.300414623 | 3.60E-13    | 7.96E-11    |
| TSS1500 | OR10J5  | 1  | 159507078/159506621/159506033/159506559/159507162              | 5 | cg06251978/cg07037019/cg12068949/cg15015426/cg26043322                       | 0.563549202 | 0.486898869 | 0.386419456 | -0.177129746 | 3.08E-09    | 3.39E-08    |
| TSS1500 | OR10K2  | 1  | 158391119                                                      | 1 | cg01733284                                                                   | 0.809446245 | 0.676295411 | 0.484221795 | -0.32522445  | 2.01E-07    | 1.18E-06    |
| TSS1500 | OR10P1  | 12 | 56030437/56030407/56030242                                     | 3 | cg03072740/cg20228385/cg26148774                                             | 0.73461338  | 0.664023774 | 0.567318432 | -0.167294948 | 1.52E-05    | 5.40E-05    |
| TSS1500 | OR10Z1  | 1  | 158575773/158575177                                            | 2 | cg04436634/cg25940557                                                        | 0.551617035 | 0.422707394 | 0.367883907 | -0.183733128 | 1.19E-10    | 2.78E-09    |
| TSS1500 | OR12D2  | 6  | 29364174                                                       | 1 | cg10916646                                                                   | 0.8041645   | 0.762870067 | 0.652826555 | -0.151337945 | 0.002946118 | 0.006411979 |

|         |        |    |                                                 |   |                                                     |             |             |             |              |          |            |
|---------|--------|----|-------------------------------------------------|---|-----------------------------------------------------|-------------|-------------|-------------|--------------|----------|------------|
| TSS1500 | OR13A1 | 10 | 45811730/4581188<br>2                           | 2 | cg08244656/cg16348<br>164                           | 0.850205443 | 0.789640889 | 0.68926543  | -0.160940013 | 6.22E-07 | 3.16E-06   |
| TSS1500 | OR13C3 | 9  | 107299308                                       | 1 | cg06565452                                          | 0.6851264   | 0.616573333 | 0.498076218 | -0.187050182 | 1.75E-05 | 6.14E-05   |
| TSS1500 | OR1A2  | 17 | 3100171/3099847                                 | 2 | cg03271520/cg27429<br>194                           | 0.601605063 | 0.492386736 | 0.380554532 | -0.221050531 | 3.18E-10 | 5.71E-09   |
| TSS1500 | OR1E2  | 17 | 3337719/3337590                                 | 2 | cg10231746/cg26048<br>334                           | 0.513915868 | 0.413014469 | 0.289777491 | -0.224138377 | 1.13E-11 | 5.66E-10   |
| TSS1500 | OR1G1  | 17 | 3031874/3031618/3<br>031354/3031450             | 4 | cg00085430/cg02499<br>925/cg06882926/cg2<br>6313699 | 0.623778385 | 0.531348825 | 0.427514652 | -0.196263733 | 1.80E-09 | 2.18E-08   |
| TSS1500 | OR2A5  | 7  | 143746979/143746<br>594/143746413               | 3 | cg07119136/cg18845<br>598/cg19437001                | 0.661934    | 0.516021297 | 0.397315886 | -0.264618114 | 1.55E-10 | 3.33E-09   |
| TSS1500 | OR2AG1 | 11 | 6805810/6805701/6<br>804983                     | 3 | cg02634507/cg04895<br>001/cg12186981                | 0.524300233 | 0.434514633 | 0.355036635 | -0.169263598 | 5.72E-10 | 8.85E-09   |
| TSS1500 | OR2B11 | 1  | 247616523/247615<br>658/247616686/247<br>615683 | 4 | cg00112952/cg06852<br>298/cg14830002/cg2<br>1302594 | 0.638484377 | 0.559944263 | 0.480157585 | -0.158326792 | 1.07E-10 | 2.56E-09   |
| TSS1500 | OR2B3  | 6  | 29055885                                        | 1 | cg16908601                                          | 0.569006465 | 0.419974078 | 0.288868686 | -0.280137779 | 1.85E-14 | 2.04E-11   |
| TSS1500 | OR2C3  | 1  | 247697875/247697<br>502/247698341/247<br>698186 | 4 | cg02795546/cg20320<br>823/cg22699727/cg2<br>3016600 | 0.656873617 | 0.576313594 | 0.492141241 | -0.164732376 | 9.28E-14 | 4.52E-11   |
| TSS1500 | OR2F1  | 7  | 143655754/143655<br>651/143656153               | 3 | cg07839906/cg13050<br>390/cg21275920                | 0.666483783 | 0.568414586 | 0.471344682 | -0.195139101 | 1.96E-08 | 1.56E-07   |
| TSS1500 | OR2G3  | 1  | 247767976                                       | 1 | cg09766710                                          | 0.63676276  | 0.581245239 | 0.448602795 | -0.188159965 | 4.20E-05 | 0.00013476 |
| TSS1500 | OR2G6  | 1  | 248683682/248684<br>628                         | 2 | cg03623288/cg07395<br>806                           | 0.78161718  | 0.719056036 | 0.625789348 | -0.155827832 | 1.00E-09 | 1.38E-08   |
| TSS1500 | OR2J2  | 6  | 29140768/2914062<br>2/29140126                  | 3 | cg13169479/cg13299<br>436/cg27191906                | 0.734226688 | 0.641388881 | 0.568359573 | -0.165867115 | 6.37E-09 | 6.10E-08   |
| TSS1500 | OR2L8  | 1  | 248111283/248110<br>661                         | 2 | cg10580513/cg18857<br>759                           | 0.613446275 | 0.493381778 | 0.319458732 | -0.293987543 | 1.23E-14 | 1.87E-11   |
| TSS1500 | OR2M2  | 1  | 248342467/248342<br>534                         | 2 | cg10515630/cg22490<br>229                           | 0.409496655 | 0.2953628   | 0.206906645 | -0.20259001  | 8.31E-13 | 1.29E-10   |
| TSS1500 | OR2M3  | 1  | 248365229                                       | 1 | cg23028721                                          | 0.60097878  | 0.4924264   | 0.418715382 | -0.182263398 | 4.82E-11 | 1.51E-09   |
| TSS1500 | OR2T10 | 1  | 248758128                                       | 1 | cg22673542                                          | 0.81877778  | 0.724369522 | 0.614701241 | -0.204076539 | 2.29E-05 | 7.79E-05   |
| TSS1500 | OR2T33 | 1  | 248438569                                       | 1 | cg06400301                                          | 0.35495367  | 0.269525494 | 0.198565408 | -0.156388262 | 1.95E-12 | 2.06E-10   |
| TSS1500 | OR2T34 | 1  | 248738984/248738<br>754                         | 2 | cg04102905/cg13441<br>213                           | 0.39234342  | 0.292704539 | 0.201744141 | -0.190599279 | 2.96E-14 | 2.34E-11   |
| TSS1500 | OR2T6  | 1  | 248549941/248549<br>671                         | 2 | cg02077084/cg06846<br>214                           | 0.646097265 | 0.518750161 | 0.390261425 | -0.25583584  | 2.03E-11 | 8.33E-10   |
| TSS1500 | OR2W1  | 6  | 29014046/2901333<br>6                           | 2 | cg05779068/cg25133<br>685                           | 0.457924378 | 0.369909933 | 0.250572923 | -0.207351455 | 5.60E-12 | 3.93E-10   |
| TSS1500 | OR4A47 | 11 | 48509778/4850948<br>8                           | 2 | cg13319761/cg17017<br>814                           | 0.826385585 | 0.787807428 | 0.66361185  | -0.162773735 | 2.15E-05 | 7.34E-05   |

|         |        |    |                                |   |                                      |             |             |             |              |             |             |
|---------|--------|----|--------------------------------|---|--------------------------------------|-------------|-------------|-------------|--------------|-------------|-------------|
| TSS1500 | OR4D11 | 11 | 59269966/5927040<br>9/59270264 | 3 | cg17165818/cg20181<br>079/cg21943004 | 0.76043115  | 0.7200874   | 0.588896523 | -0.171534627 | 0.000172515 | 0.000483359 |
| TSS1500 | OR4D2  | 17 | 56245848/5624665<br>0/56246435 | 3 | cg02874396/cg10233<br>463/cg14819820 | 0.766537472 | 0.696998965 | 0.603597921 | -0.16293955  | 3.15E-09    | 3.45E-08    |
| TSS1500 | OR4D6  | 11 | 59224044/5922399<br>6          | 2 | cg17257444/cg23713<br>772            | 0.709235645 | 0.614718789 | 0.543353427 | -0.165882218 | 1.99E-05    | 6.86E-05    |
| TSS1500 | OR4K5  | 14 | 20387292                       | 1 | cg06749213                           | 0.76080899  | 0.660395411 | 0.558850545 | -0.201958445 | 4.70E-06    | 1.87E-05    |
| TSS1500 | OR51B2 | 11 | 5346249/5346163                | 2 | cg14269191/cg21057<br>473            | 0.6091635   | 0.480761589 | 0.343335405 | -0.265828095 | 1.14E-12    | 1.54E-10    |
| TSS1500 | OR51B4 | 11 | 5324199                        | 1 | cg26800915                           | 0.508702785 | 0.362163839 | 0.244985814 | -0.263716971 | 1.16E-13    | 4.78E-11    |
| TSS1500 | OR51B5 | 11 | 5365377/5364972                | 2 | cg07568203/cg20490<br>724            | 0.65111691  | 0.554630022 | 0.465040523 | -0.186076387 | 6.47E-07    | 3.27E-06    |
| TSS1500 | OR51B6 | 11 | 5372503                        | 1 | cg12930930                           | 0.37852885  | 0.272639311 | 0.193925141 | -0.184603709 | 1.23E-11    | 5.99E-10    |
| TSS1500 | OR51I2 | 11 | 5474001                        | 1 | cg12687069                           | 0.76563654  | 0.726511311 | 0.595507877 | -0.170128663 | 9.06E-06    | 3.37E-05    |
| TSS1500 | OR51S1 | 11 | 4871411/4871813                | 2 | cg15781504/cg20867<br>746            | 0.58657604  | 0.515343631 | 0.374817345 | -0.211758695 | 7.64E-08    | 5.02E-07    |
| TSS1500 | OR52A1 | 11 | 5174413                        | 1 | cg25310592                           | 0.61949272  | 0.520463283 | 0.385828859 | -0.233663861 | 4.62E-06    | 1.85E-05    |
| TSS1500 | OR52A4 | 11 | 5143555/5144101                | 2 | cg12593634/cg26365<br>623            | 0.585631025 | 0.498621708 | 0.417428286 | -0.168202739 | 1.24E-08    | 1.06E-07    |
| TSS1500 | OR52B2 | 11 | 6192419/6192943/6<br>192512    | 3 | cg17163363/cg20709<br>280/cg21966764 | 0.325565596 | 0.215716622 | 0.15523722  | -0.170328376 | 3.24E-13    | 7.87E-11    |
| TSS1500 | OR52K2 | 11 | 4469604/4469073/4<br>469894    | 3 | cg05117324/cg12250<br>761/cg23562479 | 0.577747605 | 0.486708467 | 0.397521538 | -0.180226068 | 1.60E-06    | 7.20E-06    |
| TSS1500 | OR56A1 | 11 | 6049729                        | 1 | cg18512262                           | 0.57736578  | 0.416929178 | 0.255862718 | -0.321503062 | 2.82E-14    | 2.33E-11    |
| TSS1500 | OR56A3 | 11 | 5967520                        | 1 | cg25451456                           | 0.610336965 | 0.454748644 | 0.318152514 | -0.292184451 | 1.19E-10    | 2.78E-09    |
| TSS1500 | OR5AU1 | 14 | 21624639/2162506<br>3/21625173 | 3 | cg07555731/cg11725<br>400/cg13816428 | 0.470629048 | 0.382931557 | 0.274508099 | -0.196120949 | 7.74E-11    | 2.02E-09    |
| TSS1500 | OR5D14 | 11 | 55561545                       | 1 | cg21052687                           | 0.415296465 | 0.317666189 | 0.231353923 | -0.183942542 | 2.25E-10    | 4.39E-09    |
| TSS1500 | OR5D16 | 11 | 55605161                       | 1 | cg25384000                           | 0.47912568  | 0.368980472 | 0.259364377 | -0.219761303 | 2.68E-11    | 1.01E-09    |
| TSS1500 | OR5H15 | 3  | 97886467/9788660<br>3          | 2 | cg01495831/cg03507<br>018            | 0.5079947   | 0.339622783 | 0.22202145  | -0.28597325  | 2.34E-13    | 7.11E-11    |
| TSS1500 | OR5I1  | 11 | 55704601/5570436<br>4/55705284 | 3 | cg05421392/cg15717<br>907/cg17120792 | 0.69979639  | 0.584795139 | 0.505317734 | -0.194478656 | 2.72E-08    | 2.07E-07    |
| TSS1500 | OR5K2  | 3  | 98216207                       | 1 | cg04490079                           | 0.78112885  | 0.6731842   | 0.527136227 | -0.253992623 | 3.47E-08    | 2.54E-07    |
| TSS1500 | OR5L1  | 11 | 55577775                       | 1 | cg05788138                           | 0.43409608  | 0.315650428 | 0.232912597 | -0.201183483 | 1.09E-13    | 4.63E-11    |
| TSS1500 | OR5M1  | 11 | 56381677                       | 1 | cg26600826                           | 0.78159673  | 0.690647444 | 0.596866755 | -0.184729975 | 3.17E-06    | 1.32E-05    |
| TSS1500 | OR5M3  | 11 | 56239108                       | 1 | cg21570611                           | 0.73608132  | 0.654032872 | 0.512018095 | -0.224063225 | 3.84E-06    | 1.57E-05    |
| TSS1500 | OR5P2  | 11 | 7819874/7819960/7<br>819812    | 3 | cg05957546/cg06921<br>176/cg21732056 | 0.660994498 | 0.583950753 | 0.497356861 | -0.163637636 | 2.07E-08    | 1.63E-07    |

|         |        |    |                                                   |   |                                                        |             |             |             |              |          |          |
|---------|--------|----|---------------------------------------------------|---|--------------------------------------------------------|-------------|-------------|-------------|--------------|----------|----------|
| TSS1500 | OR5P3  | 11 | 7847876/7848885/7848142                           | 3 | cg16226642/cg17086533/cg25541968                       | 0.468963508 | 0.342519611 | 0.236386068 | -0.232577439 | 2.35E-16 | 3.24E-12 |
| TSS1500 | OR5T3  | 11 | 56018532                                          | 1 | cg14284630                                             | 0.551362685 | 0.359413183 | 0.227832333 | -0.323530352 | 6.82E-14 | 3.81E-11 |
| TSS1500 | OR5V1  | 6  | 29324414/29324300/29325117/29325133               | 4 | cg07150255/cg18949521/cg20141359/cg24076830            | 0.676405032 | 0.5926789   | 0.495186223 | -0.181218809 | 3.91E-07 | 2.11E-06 |
| TSS1500 | OR6B3  | 2  | 240986651/240986437/240986376                     | 3 | cg05740739/cg18794622/cg19821536                       | 0.675063407 | 0.594787409 | 0.490746942 | -0.184316464 | 1.77E-10 | 3.68E-09 |
| TSS1500 | OR6C74 | 12 | 55639928/55640113                                 | 2 | cg09358376/cg12548176                                  | 0.539952325 | 0.4403373   | 0.308674359 | -0.231277966 | 1.82E-10 | 3.75E-09 |
| TSS1500 | OR6K2  | 1  | 158671873                                         | 1 | cg04237529                                             | 0.786127795 | 0.720068622 | 0.574184814 | -0.211942981 | 7.75E-06 | 2.92E-05 |
| TSS1500 | OR6K3  | 1  | 158689263/158688926/158688775/158689141/158688804 | 5 | cg00920395/cg05369553/cg08918576/cg09318068/cg12811284 | 0.656165129 | 0.569626347 | 0.476177247 | -0.179987882 | 8.64E-12 | 5.01E-10 |
| TSS1500 | OR6P1  | 1  | 158534143/158534679                               | 2 | cg04386839/cg20778958                                  | 0.53787173  | 0.458221153 | 0.377921573 | -0.159950157 | 1.66E-10 | 3.49E-09 |
| TSS1500 | OR7A5  | 19 | 14940319                                          | 1 | cg06639544                                             | 0.641888165 | 0.572123094 | 0.456431364 | -0.185456801 | 8.39E-06 | 3.14E-05 |
| TSS1500 | OR7G3  | 19 | 9238958                                           | 1 | cg03494634                                             | 0.49909479  | 0.375233094 | 0.270939959 | -0.228154831 | 6.34E-09 | 6.08E-08 |
| TSS1500 | OR8A1  | 11 | 124438770/124439146                               | 2 | cg24693160/cg27049594                                  | 0.441613575 | 0.31723085  | 0.244323223 | -0.197290352 | 7.01E-11 | 1.88E-09 |
| TSS1500 | OR8B12 | 11 | 124414205                                         | 1 | cg24360034                                             | 0.568804685 | 0.433410094 | 0.285303991 | -0.283500694 | 5.46E-11 | 1.62E-09 |
| TSS1500 | OR8B2  | 11 | 124254360/124253666                               | 2 | cg13012115/cg22089701                                  | 0.691964098 | 0.551748556 | 0.431076286 | -0.260887811 | 9.21E-10 | 1.28E-08 |
| TSS1500 | OR8D2  | 11 | 124191389/124190997                               | 2 | cg04629433/cg15952370                                  | 0.544132685 | 0.465419733 | 0.256743609 | -0.287389076 | 3.75E-10 | 6.46E-09 |
| TSS1500 | OR8H1  | 11 | 56059643                                          | 1 | cg22629065                                             | 0.400954475 | 0.230849657 | 0.166024259 | -0.234930216 | 1.73E-12 | 2.01E-10 |
| TSS1500 | OSTN   | 3  | 190929946                                         | 1 | cg06976994                                             | 0.849629745 | 0.7469692   | 0.641975355 | -0.20765439  | 9.45E-07 | 4.54E-06 |
| TSS1500 | OTOA   | 16 | 21694834/21715960/21694626/21715860               | 4 | cg04651601/cg07084143/cg08964929/cg27514538            | 0.739613886 | 0.655108318 | 0.5742688   | -0.165345086 | 1.86E-12 | 2.06E-10 |
| TSS1500 | OTOP1  | 4  | 4229061/4229810/4229883                           | 3 | cg03160466/cg06658468/cg20849299                       | 0.347108885 | 0.414799181 | 0.581701818 | 0.234592933  | 7.14E-07 | 3.56E-06 |
| TSS1500 | OTOS   | 2  | 241080394/241080464/241081288                     | 3 | cg09186122/cg18790143/cg19795150                       | 0.600215705 | 0.514112394 | 0.377325005 | -0.2228907   | 3.21E-10 | 5.73E-09 |
| TSS1500 | OXT    | 20 | 3051954                                           | 1 | cg04731988                                             | 0.565110025 | 0.466638878 | 0.399150264 | -0.165959761 | 5.13E-09 | 5.15E-08 |
| TSS1500 | P2RX2  | 12 | 133195094/133193959/133195196/133195061           | 4 | cg00058329/cg02315111/cg22368664/cg26620450            | 0.209241909 | 0.234090244 | 0.44044457  | 0.231202662  | 2.64E-06 | 1.12E-05 |
| TSS1500 | P2RX7  | 12 | 121569924/121570081/121569969                     | 3 | cg03248483/cg08688169/cg23801057                       | 0.66978377  | 0.571548214 | 0.47603027  | -0.1937535   | 4.64E-08 | 3.27E-07 |

|         |          |    |                                                                                 |   |                                                                                         |             |             |             |              |             |             |
|---------|----------|----|---------------------------------------------------------------------------------|---|-----------------------------------------------------------------------------------------|-------------|-------------|-------------|--------------|-------------|-------------|
| TSS1500 | PA2G4P4  | 3  | 156530506/156530658                                                             | 2 | cg08651937/cg25738116                                                                   | 0.64870593  | 0.536705056 | 0.459252914 | -0.189453016 | 1.90E-09    | 2.29E-08    |
| TSS1500 | PABPC1P2 | 2  | 147344418/147344230                                                             | 2 | cg07167132/cg15973369                                                                   | 0.8605219   | 0.791493717 | 0.703893659 | -0.156628241 | 0.000296246 | 0.000788465 |
| TSS1500 | PACSIN2  | 22 | 43343608/43343959/43343992                                                      | 3 | cg02940070/cg14859088/cg20522029                                                        | 0.828972365 | 0.686343339 | 0.559136014 | -0.269836351 | 4.19E-09    | 4.37E-08    |
| TSS1500 | PAEP     | 9  | 138452950/138452724                                                             | 2 | cg01055695/cg13831723                                                                   | 0.61616945  | 0.4870127   | 0.412020073 | -0.204149377 | 3.15E-11    | 1.13E-09    |
| TSS1500 | PALM2    | 9  | 112402580/112402515                                                             | 2 | cg00752376/cg14102267                                                                   | 0.148940632 | 0.183175232 | 0.313359897 | 0.164419265  | 6.60E-06    | 2.53E-05    |
| TSS1500 | PALM3    | 19 | 14170785/14170956/14171165/14171331                                             | 4 | cg05555515/cg06633013/cg11437328/cg21648202                                             | 0.465385665 | 0.385986    | 0.304704646 | -0.160681019 | 1.12E-10    | 2.66E-09    |
| TSS1500 | PAMR1    | 11 | 35547548/35547903/35547514/35547519                                             | 4 | cg14346208/cg14642338/cg20027133/cg27635267                                             | 0.368073558 | 0.424060173 | 0.518652397 | 0.150578839  | 4.30E-05    | 0.000137809 |
| TSS1500 | PANX3    | 11 | 124480990/124481193/124481218                                                   | 3 | cg05616355/cg08317412/cg11720054                                                        | 0.577884335 | 0.527518525 | 0.410355043 | -0.167529292 | 8.25E-08    | 5.37E-07    |
| TSS1500 | PAPPA2   | 1  | 176430983                                                                       | 1 | cg11736104                                                                              | 0.488475425 | 0.365831606 | 0.266814614 | -0.221660811 | 5.92E-11    | 1.68E-09    |
| TSS1500 | PAQR9    | 3  | 142683176/142682652/142683329/142683069/142682378/142682682                     | 6 | cg00970325/cg04912999/cg08113027/cg08784462/cg14081924/cg17627617                       | 0.223809501 | 0.252425027 | 0.378689552 | 0.154880051  | 0.000318029 | 0.000841837 |
| TSS1500 | PARD6B   | 20 | 49347371/49346745/49346624/49346996                                             | 4 | cg03077621/cg03812837/cg07803218/cg09072870                                             | 0.471656451 | 0.385844349 | 0.298160328 | -0.173496123 | 1.22E-10    | 2.81E-09    |
| TSS1500 | PATE1    | 11 | 125615317/125615388                                                             | 2 | cg03455964/cg19345602                                                                   | 0.627274818 | 0.544619586 | 0.474143473 | -0.153131345 | 6.73E-08    | 4.50E-07    |
| TSS1500 | PATE2    | 11 | 125649030/125649398/125649040                                                   | 3 | cg02827046/cg07747336/cg15229773                                                        | 0.38344405  | 0.2918925   | 0.229487009 | -0.153957041 | 9.61E-12    | 5.17E-10    |
| TSS1500 | PATE3    | 11 | 125657662/125656966/125657430                                                   | 3 | cg09427644/cg24859617/cg27129320                                                        | 0.648229465 | 0.556081847 | 0.436058495 | -0.21217097  | 1.38E-07    | 8.48E-07    |
| TSS1500 | PAX2     | 10 | 102504226/102504893/102504649/102504236/102505266/102504022/102504297/102504039 | 8 | cg01275523/cg05044739/cg09222673/cg14096353/cg15416233/cg16443970/cg17945419/cg25523509 | 0.154330824 | 0.217752711 | 0.376641182 | 0.222310358  | 4.73E-07    | 2.48E-06    |
| TSS1500 | PAX7     | 1  | 18956762/18957020/18957232/18957023/18956947                                    | 5 | cg04129469/cg05052324/cg07536847/cg08235970/cg25020286                                  | 0.288184994 | 0.35674689  | 0.480504976 | 0.192319982  | 2.69E-05    | 9.01E-05    |

|         |          |    |                                                                                                   |   |                                                                                                         |             |             |             |              |             |             |
|---------|----------|----|---------------------------------------------------------------------------------------------------|---|---------------------------------------------------------------------------------------------------------|-------------|-------------|-------------|--------------|-------------|-------------|
| TSS1500 | PCBP3    | 21 | 47269627/4726867<br>0/47269180                                                                    | 3 | cg07685034/cg11121<br>969/cg12492289                                                                    | 0.644069435 | 0.563205506 | 0.478153968 | -0.165915467 | 3.87E-07    | 2.09E-06    |
| TSS1500 | PCDH10   | 4  | 134069409/134070<br>235/134069304/134<br>069670/134070039/ 8<br>134069388/134069<br>593/134069236 | 8 | cg00945238/cg02043<br>159/cg02114924/cg0<br>4035209/cg05401965<br>/cg07665387/cg1019<br>6720/cg14146100 | 0.321056674 | 0.419374559 | 0.61695395  | 0.295897277  | 1.53E-10    | 3.29E-09    |
| TSS1500 | PCDH17   | 13 | 58205001/5820437<br>9/58205045/582043 5<br>65/58205111                                            | 5 | cg07430472/cg12606<br>396/cg13806135/cg1<br>5112032/cg25891355                                          | 0.293968366 | 0.406563267 | 0.570533475 | 0.276565109  | 6.24E-11    | 1.74E-09    |
| TSS1500 | PCDH8    | 13 | 53423078/5342394<br>0/53424032/534241<br>27/53423262/53424 8<br>049/53423132/5342<br>3037         | 8 | cg01382137/cg06114<br>087/cg10323552/cg1<br>0484958/cg12545687<br>/cg12568898/cg1945<br>6622/cg24560494 | 0.287963129 | 0.346247767 | 0.453926438 | 0.165963309  | 2.59E-05    | 8.73E-05    |
| TSS1500 | PCDHA11  | 5  | 140246511/140246<br>626                                                                           | 2 | cg08974687/cg19976<br>449                                                                               | 0.625021505 | 0.553701083 | 0.450787459 | -0.174234046 | 0.000354254 | 0.000929427 |
| TSS1500 | PCDHB13  | 5  | 140592867                                                                                         | 1 | cg14640659                                                                                              | 0.53019649  | 0.422112661 | 0.332099091 | -0.198097399 | 6.88E-10    | 1.02E-08    |
| TSS1500 | PCDHB15  | 5  | 140624869/140624<br>874/140624184/140 4<br>624888                                                 | 4 | cg03572772/cg17023<br>770/cg17300966/cg2<br>2732749                                                     | 0.52387506  | 0.59467537  | 0.682976882 | 0.159101822  | 1.37E-07    | 8.43E-07    |
| TSS1500 | PCDHB19P | 5  | 140619446                                                                                         | 1 | cg19727801                                                                                              | 0.42712357  | 0.509465556 | 0.595608027 | 0.168484457  | 0.000346368 | 0.000910121 |
| TSS1500 | PCDHB3   | 5  | 140479983/140479<br>979/140479025                                                                 | 3 | cg02125910/cg18782<br>991/cg23918315                                                                    | 0.3560458   | 0.425231208 | 0.558751841 | 0.202706041  | 6.59E-06    | 2.53E-05    |
| TSS1500 | PCDHB6   | 5  | 140529580/140529<br>627/140529499/140 4<br>528785                                                 | 4 | cg09178190/cg15038<br>110/cg24811352/cg2<br>6866168                                                     | 0.410451715 | 0.477121828 | 0.574078646 | 0.163626931  | 2.04E-05    | 7.01E-05    |
| TSS1500 | PCDHGA5  | 5  | 140743575                                                                                         | 1 | cg07520649                                                                                              | 0.476589265 | 0.527419161 | 0.635315509 | 0.158726244  | 0.002278614 | 0.005066138 |
| TSS1500 | PCDHGB3  | 5  | 140749735/140749<br>745/140748559                                                                 | 3 | cg02575448/cg04242<br>499/cg17227466                                                                    | 0.372638778 | 0.490735672 | 0.636786955 | 0.264148177  | 6.04E-09    | 5.84E-08    |
| TSS1500 | PCDHGB4  | 5  | 140767197/140767<br>242/140766911/140 4<br>767200                                                 | 4 | cg02741229/cg22041<br>640/cg23347399/cg2<br>6282384                                                     | 0.366960643 | 0.434457358 | 0.585020359 | 0.218059717  | 2.02E-06    | 8.85E-06    |
| TSS1500 | PCDHGB5  | 5  | 140777473/140777<br>344                                                                           | 2 | cg11686427/cg25426<br>815                                                                               | 0.374205635 | 0.391285904 | 0.576918885 | 0.20271325   | 1.86E-06    | 8.22E-06    |
| TSS1500 | PCDHGC4  | 5  | 140864276/140864<br>474/140864020                                                                 | 3 | cg06428620/cg12648<br>074/cg26890354                                                                    | 0.26878578  | 0.380269639 | 0.540655073 | 0.271869293  | 1.71E-08    | 1.39E-07    |



|         |         |    |                                                                                                                                                                    |    |                                                                                                                                                                                                          |             |             |             |              |          |          |
|---------|---------|----|--------------------------------------------------------------------------------------------------------------------------------------------------------------------|----|----------------------------------------------------------------------------------------------------------------------------------------------------------------------------------------------------------|-------------|-------------|-------------|--------------|----------|----------|
| TSS1500 | PCK1    | 20 | 56135029/5613464<br>8/56135615                                                                                                                                     | 3  | cg10278454/cg13655<br>303/cg27661711                                                                                                                                                                     | 0.513722698 | 0.410655397 | 0.317222318 | -0.196500379 | 2.25E-11 | 8.82E-10 |
| TSS1500 | PCSK2   | 20 | 17206999/1720694<br>6/17207337/172072<br>46/17206529/17206<br>720/17206245                                                                                         | 7  | cg00621913/cg01815<br>529/cg02979923/cg0<br>6441668/cg15060366<br>/cg19864758/cg2073<br>7505                                                                                                             | 0.263348347 | 0.293499158 | 0.429381111 | 0.166032765  | 2.84E-07 | 1.59E-06 |
| TSS1500 | PDE6C   | 10 | 95372040/9537206<br>9                                                                                                                                              | 2  | cg02444484/cg16316<br>382                                                                                                                                                                                | 0.70831645  | 0.581169372 | 0.465490445 | -0.242826005 | 9.22E-11 | 2.31E-09 |
| TSS1500 | PDGFD   | 11 | 104035557/104035<br>942/104035761                                                                                                                                  | 3  | cg04228039/cg12686<br>407/cg16322276                                                                                                                                                                     | 0.763762493 | 0.684322381 | 0.556202448 | -0.207560045 | 6.25E-10 | 9.48E-09 |
| TSS1500 | PDPN    | 1  | 13909623/1391066<br>7/13910698/139107<br>00/13909522/13910<br>555/13910569/1390<br>9743/13909161/139<br>10796/13909821                                             | 11 | cg00831909/cg05140<br>069/cg05281894/cg0<br>9804380/cg16590190<br>/cg18877506/cg2181<br>9468/cg22798977/cg<br>23954416/cg2467134<br>4/cg25286482                                                         | 0.403051092 | 0.493909931 | 0.578509288 | 0.175458196  | 6.65E-07 | 3.35E-06 |
| TSS1500 | PENK    | 8  | 57360226/5735920<br>0/57359956/573599<br>70/57359258/57359<br>414/57360727/5736<br>0711/57360586/573<br>60613/57359399/57<br>360738/57359992/5<br>7358928/57359908 | 15 | cg03650233/cg06066<br>137/cg07080864/cg0<br>9015433/cg10397440<br>/cg11060276/cg1161<br>0346/cg16072688/cg<br>16219603/cg1641923<br>5/cg19149681/cg207<br>87219/cg23350294/c<br>g24645221/cg275313<br>36 | 0.4137276   | 0.48479181  | 0.567386419 | 0.153658819  | 1.02E-07 | 6.45E-07 |
| TSS1500 | PEX5L   | 3  | 179755285/179755<br>086/179755235/179<br>754761                                                                                                                    | 4  | cg05131623/cg18780<br>412/cg21176048/cg2<br>1564242                                                                                                                                                      | 0.251006861 | 0.344533715 | 0.455294833 | 0.204287973  | 2.60E-08 | 1.99E-07 |
| TSS1500 | PFKFB2  | 1  | 207225647/207225<br>128/207225424/207<br>226112/207226369                                                                                                          | 5  | cg01380361/cg02710<br>090/cg06119874/cg1<br>7808646/cg20291513                                                                                                                                           | 0.552623797 | 0.424167892 | 0.329906596 | -0.222717201 | 2.07E-12 | 2.14E-10 |
| TSS1500 | PGLYRP4 | 1  | 153322488/153321<br>421/153322011/153<br>321907                                                                                                                    | 4  | cg01093088/cg02956<br>542/cg06954535/cg2<br>1691717                                                                                                                                                      | 0.733646965 | 0.670511981 | 0.574906157 | -0.158740808 | 1.86E-06 | 8.23E-06 |
| TSS1500 | PHF14   | 7  | 11012873/1101327<br>4/11012967                                                                                                                                     | 3  | cg07230486/cg23083<br>824/cg27578754                                                                                                                                                                     | 0.44488043  | 0.355290359 | 0.282614076 | -0.162266354 | 4.28E-12 | 3.41E-10 |

|         |          |    |                                                                            |   |                                                                                                                        |             |             |             |              |             |             |
|---------|----------|----|----------------------------------------------------------------------------|---|------------------------------------------------------------------------------------------------------------------------|-------------|-------------|-------------|--------------|-------------|-------------|
| TSS1500 | PHGR1    | 15 | 40641810/4064299<br>8/40641778                                             | 3 | cg01376665/cg07047<br>589/cg21067750                                                                                   | 0.447002958 | 0.341258356 | 0.271650589 | -0.175352369 | 4.82E-13    | 9.15E-11    |
| TSS1500 | PHOX2A   | 11 | 71956145/7195554<br>7/71955439/719555<br>99                                | 4 | cg01527777/cg08876<br>932/cg16922279/cg2<br>4530250                                                                    | 0.301572288 | 0.360743145 | 0.521985263 | 0.220412975  | 7.42E-06    | 2.81E-05    |
| TSS1500 | PI3      | 20 | 43802992/4380322<br>4                                                      | 2 | cg02733351/cg19931<br>348                                                                                              | 0.547077243 | 0.396620872 | 0.291040902 | -0.25603634  | 2.01E-13    | 6.78E-11    |
| TSS1500 | PI4KAP1  | 22 | 20399601/2039997<br>4/20400015                                             | 3 | cg11814655/cg20969<br>061/cg24289553                                                                                   | 0.657877928 | 0.517192664 | 0.418995705 | -0.238882223 | 1.21E-13    | 4.87E-11    |
| TSS1500 | PICK1    | 22 | 38452315/3845286<br>6                                                      | 2 | cg14332918/cg16760<br>049                                                                                              | 0.742848465 | 0.614979067 | 0.563908509 | -0.178939956 | 2.46E-06    | 1.05E-05    |
| TSS1500 | PIGB     | 15 | 55610624                                                                   | 1 | cg19991916                                                                                                             | 0.88449073  | 0.625994622 | 0.479371295 | -0.405119435 | 1.04E-07    | 6.60E-07    |
| TSS1500 | PKD1L2   | 16 | 81254719/8125531<br>0/81254209                                             | 3 | cg00163702/cg04175<br>109/cg07091758                                                                                   | 0.563397308 | 0.504784178 | 0.407313    | -0.156084308 | 1.21E-10    | 2.81E-09    |
| TSS1500 | PKIA     | 8  | 79427993/7942811<br>7                                                      | 2 | cg04689061/cg17686<br>936                                                                                              | 0.133843346 | 0.214565327 | 0.341871826 | 0.20802848   | 1.92E-05    | 6.66E-05    |
| TSS1500 | PKP3     | 11 | 393606/393570/393<br>938/393392/393038<br>/392903/393648/39<br>3029/393328 | 9 | cg03547062/cg03638<br>937/cg05214427/cg0<br>9950681/cg10517281<br>/cg15002541/cg1830<br>8516/cg20268054/cg<br>20992002 | 0.663288687 | 0.588267227 | 0.511135906 | -0.152152781 | 1.20E-09    | 1.59E-08    |
| TSS1500 | PLA2G12B | 10 | 74714935/7471474<br>5                                                      | 2 | cg02044879/cg10842<br>126                                                                                              | 0.52159846  | 0.417312822 | 0.336302905 | -0.185295555 | 1.30E-09    | 1.69E-08    |
| TSS1500 | PLA2G4B  | 15 | 42130662/4213065<br>0/42130735                                             | 3 | cg07178968/cg13038<br>025/cg18827756                                                                                   | 0.532365117 | 0.422651831 | 0.342931191 | -0.189433926 | 2.33E-11    | 8.97E-10    |
| TSS1500 | PLCB1    | 20 | 8112972/8112956/8<br>112754                                                | 3 | cg17510056/cg21844<br>450/cg23657409                                                                                   | 0.155928824 | 0.213287391 | 0.358267503 | 0.202338679  | 0.000574701 | 0.001444479 |
| TSS1500 | PLD5     | 1  | 242688320/242688<br>226/242688681/242<br>688591/242688523                  | 5 | cg04205107/cg08659<br>667/cg12613383/cg1<br>8789663/cg22679728                                                         | 0.257086537 | 0.276485099 | 0.425248052 | 0.168161515  | 0.000189003 | 0.000524521 |
| TSS1500 | PLEK2    | 14 | 67879385/6787910<br>1/67879126/678791<br>66                                | 4 | cg14437634/cg18306<br>861/cg24995657/cg2<br>6225496                                                                    | 0.404374269 | 0.312495453 | 0.252504709 | -0.15186956  | 1.62E-09    | 2.01E-08    |
| TSS1500 | PLIN1    | 15 | 90223301/9022409<br>8/90223712                                             | 3 | cg01348757/cg08749<br>443/cg11526413                                                                                   | 0.67200997  | 0.514776276 | 0.43185497  | -0.240155    | 5.88E-12    | 4.07E-10    |
| TSS1500 | PNLIP    | 10 | 118304610/118304<br>534                                                    | 2 | cg23728588/cg24571<br>875                                                                                              | 0.544443475 | 0.428520861 | 0.306191127 | -0.238252348 | 2.22E-11    | 8.76E-10    |
| TSS1500 | PNLIPRP1 | 10 | 118349587/118349<br>430                                                    | 2 | cg20730333/cg27600<br>794                                                                                              | 0.475173458 | 0.380116472 | 0.313393393 | -0.161780064 | 3.69E-11    | 1.26E-09    |
| TSS1500 | PNLIPRP2 | 10 | 118380177/118380<br>175                                                    | 2 | cg07093456/cg11310<br>496                                                                                              | 0.653975088 | 0.541016308 | 0.437239598 | -0.21673549  | 3.14E-10    | 5.65E-09    |

|         |           |    |                                                                                                                                                                            |    |                                                                                                                                                                                                                  |             |             |             |              |             |             |
|---------|-----------|----|----------------------------------------------------------------------------------------------------------------------------------------------------------------------------|----|------------------------------------------------------------------------------------------------------------------------------------------------------------------------------------------------------------------|-------------|-------------|-------------|--------------|-------------|-------------|
| TSS1500 | PNLIPRP3  | 10 | 118187088/118187002/118186901                                                                                                                                              | 3  | cg07037454/cg14539856/cg17197596                                                                                                                                                                                 | 0.637080098 | 0.529848331 | 0.428697098 | -0.208383    | 7.77E-10    | 1.12E-08    |
| TSS1500 | PNOC      | 8  | 28173887/28173732/28174192/28174350                                                                                                                                        | 4  | cg05988605/cg19391527/cg22632756/cg27336360                                                                                                                                                                      | 0.536138543 | 0.441124608 | 0.378128732 | -0.158009811 | 5.98E-10    | 9.13E-09    |
| TSS1500 | POLD3     | 11 | 74302893/74303294/74303012                                                                                                                                                 | 3  | cg01173485/cg08923614/cg26885816                                                                                                                                                                                 | 0.678336867 | 0.512326711 | 0.399130685 | -0.279206182 | 4.46E-12    | 3.50E-10    |
| TSS1500 | POM121L12 | 7  | 53102694/53102721                                                                                                                                                          | 2  | cg12333737/cg20170989                                                                                                                                                                                            | 0.42947934  | 0.279301172 | 0.187995841 | -0.241483499 | 8.06E-13    | 1.26E-10    |
| TSS1500 | PON3      | 7  | 95026095/95026106/95027158/95026248/95026097/95026181/95026073/95026937/95025924/95025905/95026502/95026538/95026211/95026066/95025955/95026672/95026121/95026193/95026090 | 19 | cg03301582/cg04080282/cg04350520/cg08461772/cg08898155/cg10329418/cg11435506/cg11700490/cg15500865/cg15927196/cg18241308/cg20985067/cg24750391/cg25161512/cg25572105/cg25879118/cg26457160/cg27166921/cg27413563 | 0.410517907 | 0.386368056 | 0.248245585 | -0.162272322 | 5.90E-09    | 5.74E-08    |
| TSS1500 | POU4F2    | 4  | 147559648/147559579/147559423/147558544                                                                                                                                    | 4  | cg12935979/cg13262687/cg19597382/cg25970230                                                                                                                                                                      | 0.33730075  | 0.459647814 | 0.634065168 | 0.296764418  | 1.22E-09    | 1.60E-08    |
| TSS1500 | POU4F3    | 5  | 145717597/14571661/145717858/145717283/145717140/145717145/145718098                                                                                                       | 7  | cg01386275/cg08531042/cg10627091/cg14099595/cg16101493/cg26932154/cg27309276                                                                                                                                     | 0.280609568 | 0.352104207 | 0.469329703 | 0.188720135  | 4.48E-06    | 1.80E-05    |
| TSS1500 | PPFIA4    | 1  | 203019520/203019107/203018871                                                                                                                                              | 3  | cg03511671/cg04914198/cg19824396                                                                                                                                                                                 | 0.631080523 | 0.533745854 | 0.438609358 | -0.192471166 | 2.71E-10    | 5.07E-09    |
| TSS1500 | PPIAL4A   | 1  | 147956744                                                                                                                                                                  | 1  | cg23350716                                                                                                                                                                                                       | 0.590929435 | 0.499748721 | 0.350470012 | -0.240459423 | 0.000139014 | 0.000396402 |
| TSS1500 | PPIAL4B   | 1  | 147956744                                                                                                                                                                  | 1  | cg23350716                                                                                                                                                                                                       | 0.590929435 | 0.499748721 | 0.350470012 | -0.240459423 | 0.000139014 | 0.000396402 |
| TSS1500 | PPIAL4D   | 1  | 148203924                                                                                                                                                                  | 1  | cg18072778                                                                                                                                                                                                       | 0.70183991  | 0.588887167 | 0.473528791 | -0.228311119 | 3.80E-12    | 3.20E-10    |
| TSS1500 | PPIAL4F   | 1  | 148203924                                                                                                                                                                  | 1  | cg18072778                                                                                                                                                                                                       | 0.70183991  | 0.588887167 | 0.473528791 | -0.228311119 | 3.80E-12    | 3.20E-10    |
| TSS1500 | PPIL1     | 6  | 36843333/36843324                                                                                                                                                          | 2  | cg01910741/cg13939462                                                                                                                                                                                            | 0.53291697  | 0.452263067 | 0.372321852 | -0.160595118 | 4.21E-08    | 3.00E-07    |
| TSS1500 | PPP1R15A  | 19 | 49374447                                                                                                                                                                   | 1  | cg19366381                                                                                                                                                                                                       | 0.764133405 | 0.659515422 | 0.595463086 | -0.168670319 | 4.36E-09    | 4.51E-08    |
| TSS1500 | PPP1R2P1  | 6  | 32843055/32844032                                                                                                                                                          | 2  | cg13617603/cg22744098                                                                                                                                                                                            | 0.57436797  | 0.467743344 | 0.305982527 | -0.268385443 | 4.15E-14    | 3.03E-11    |

|         |          |    |                                                       |   |                                                                   |             |             |             |              |            |             |
|---------|----------|----|-------------------------------------------------------|---|-------------------------------------------------------------------|-------------|-------------|-------------|--------------|------------|-------------|
| TSS1500 | PPP3R2   | 9  | 104357967/104358101                                   | 2 | cg14285012/cg15765694                                             | 0.7871305   | 0.684650894 | 0.609841055 | -0.177289445 | 1.42E-06   | 6.49E-06    |
| TSS1500 | PPP4R2   | 3  | 73045556/73045440/73045686                            | 3 | cg03847932/cg06051312/cg20540428                                  | 0.798157715 | 0.585135433 | 0.506348109 | -0.291809606 | 2.54E-06   | 1.08E-05    |
| TSS1500 | PRAMEF12 | 1  | 12833744/12834742                                     | 2 | cg11346333/cg11737871                                             | 0.73273357  | 0.653420256 | 0.555544648 | -0.177188922 | 5.27E-07   | 2.73E-06    |
| TSS1500 | PRB1     | 12 | 11509583                                              | 1 | cg27345534                                                        | 0.627720395 | 0.482526639 | 0.475575409 | -0.152144986 | 4.08E-05   | 0.000131228 |
| TSS1500 | PRB2     | 12 | 11548867/11549192/11549555                            | 3 | cg20480899/cg23372297/cg24891312                                  | 0.516973713 | 0.334886022 | 0.339073968 | -0.177899744 | 1.92E-05   | 6.65E-05    |
| TSS1500 | PREX2    | 8  | 68864318/68864247/68864012/68864179/68864324          | 5 | cg05293738/cg11549615/cg13652336/cg16009633/cg17747005            | 0.212036291 | 0.282992822 | 0.431062793 | 0.219026502  | 4.54E-05   | 0.000144809 |
| TSS1500 | PRG2     | 11 | 57158970/57158361/57159174                            | 3 | cg05471009/cg15357945/cg15971518                                  | 0.580150103 | 0.4524716   | 0.354212243 | -0.225937859 | 8.71E-10   | 1.23E-08    |
| TSS1500 | PRG3     | 11 | 57149840/57148918                                     | 2 | cg04620833/cg23995769                                             | 0.70829775  | 0.630752489 | 0.496240977 | -0.212056773 | 2.00E-07   | 1.17E-06    |
| TSS1500 | PRKG2    | 4  | 82127274/82126891                                     | 2 | cg10060562/cg12977791                                             | 0.61671862  | 0.471055278 | 0.410353882 | -0.206364738 | 8.47E-08   | 5.49E-07    |
| TSS1500 | PROCA1   | 17 | 27039523/27039120/27039132                            | 3 | cg04578090/cg07585069/cg18448746                                  | 0.375061977 | 0.511718469 | 0.604883885 | 0.229821908  | 6.77E-08   | 4.52E-07    |
| TSS1500 | PRODH2   | 19 | 36305584/36305049                                     | 2 | cg17122301/cg27039606                                             | 0.7312012   | 0.623197111 | 0.556722855 | -0.174478345 | 1.75E-05   | 6.11E-05    |
| TSS1500 | PROX2    | 14 | 75331272/75330792/75331970/75330790/75330798          | 5 | cg02110830/cg10165162/cg10197640/cg20382622/cg21112954            | 0.705497983 | 0.621966173 | 0.541448418 | -0.164049565 | 1.62E-11   | 7.24E-10    |
| TSS1500 | PRR18    | 6  | 166722248/166722165/166722773                         | 3 | cg01243879/cg04329390/cg05089968                                  | 0.55142445  | 0.424501033 | 0.334371664 | -0.217052786 | 1.49E-11   | 6.82E-10    |
| TSS1500 | PRSS1    | 7  | 142456124                                             | 1 | cg12878228                                                        | 0.61023168  | 0.443697222 | 0.330479082 | -0.279752598 | 1.26E-12   | 1.65E-10    |
| TSS1500 | PRSSL1   | 19 | 696859/696946/696832                                  | 3 | cg07898360/cg10746622/cg18754695                                  | 0.63056396  | 0.510106139 | 0.414960555 | -0.215603405 | 6.43E-12   | 4.20E-10    |
| TSS1500 | PRTG     | 15 | 56036455/56035454/56035459/56035463/56035476/56035616 | 6 | cg04124457/cg06877762/cg13333185/cg13778723/cg18132228/cg20951555 | 0.286004209 | 0.301078656 | 0.438573546 | 0.152569337  | 0.00026932 | 0.000723192 |
| TSS1500 | PRTN3    | 19 | 839689/840737/840447/839678                           | 4 | cg00615241/cg09930046/cg17483523/cg24347562                       | 0.494939495 | 0.412101494 | 0.319676868 | -0.175262627 | 3.99E-11   | 1.32E-09    |
| TSS1500 | PSMB11   | 14 | 23510934/23511078/23511170                            | 3 | cg09857247/cg13487992/cg14291751                                  | 0.670911618 | 0.594378436 | 0.5102768   | -0.160634818 | 1.53E-09   | 1.93E-08    |

|         |       |    |                                                                                 |   |                                                                                                    |             |             |             |              |          |            |
|---------|-------|----|---------------------------------------------------------------------------------|---|----------------------------------------------------------------------------------------------------|-------------|-------------|-------------|--------------|----------|------------|
| TSS1500 | PSMB4 | 1  | 151370645/151371309/151371285                                                   | 3 | cg04396915/cg23106844/cg25306093                                                                   | 0.709466485 | 0.574615767 | 0.4856838   | -0.223782685 | 9.84E-11 | 2.42E-09   |
| TSS1500 | PTCRA | 6  | 42882406/42883504                                                               | 2 | cg00047532/cg11898695                                                                              | 0.670440075 | 0.606883469 | 0.518140575 | -0.1522995   | 3.51E-12 | 3.08E-10   |
| TSS1500 | PTF1A | 10 | 23480190/23480237/23480002/23479993/23480730/2348018/23480316/23481176/23480803 | 9 | cg02836919/cg04829946/cg06550984/cg09795588/cg17389519/cg19161112/cg20487710/cg22746058/cg25684999 | 0.338391577 | 0.381627901 | 0.499160176 | 0.160768599  | 6.63E-06 | 2.54E-05   |
| TSS1500 | PTH1R | 3  | 46918266/46918356                                                               | 2 | cg03391568/cg06042608                                                                              | 0.58139015  | 0.485863922 | 0.404405191 | -0.176984959 | 1.27E-09 | 1.66E-08   |
| TSS1500 | PTPN5 | 11 | 18814078/18814418/18813979                                                      | 3 | cg07217924/cg17233601/cg17250701                                                                   | 0.305738046 | 0.384040091 | 0.466929189 | 0.161191143  | 7.45E-08 | 4.91E-07   |
| TSS1500 | PTPRH | 19 | 55721638/55721792/55721180/55721290                                             | 4 | cg07097098/cg11613450/cg19673376/cg21559943                                                        | 0.527590698 | 0.468796079 | 0.364999041 | -0.162591657 | 1.68E-08 | 1.37E-07   |
| TSS1500 | PTPRQ | 12 | 80836629                                                                        | 1 | cg20238308                                                                                         | 0.47658491  | 0.339737956 | 0.225000109 | -0.251584801 | 1.09E-11 | 5.56E-10   |
| TSS1500 | PTPRT | 20 | 41819125/41818788/41818770/41818905                                             | 4 | cg04541293/cg07167168/cg17859110/cg21672843                                                        | 0.184511835 | 0.266124741 | 0.432638811 | 0.248126976  | 1.95E-08 | 1.55E-07   |
| TSS1500 | PUM2  | 2  | 20527635/20527677/20527833                                                      | 3 | cg01888166/cg08659707/cg22528172                                                                   | 0.823101043 | 0.667000056 | 0.617046847 | -0.206054196 | 3.26E-09 | 3.54E-08   |
| TSS1500 | PUS10 | 2  | 61246248                                                                        | 1 | cg00326648                                                                                         | 0.65441283  | 0.547016283 | 0.433104527 | -0.221308303 | 7.17E-10 | 1.06E-08   |
| TSS1500 | PUS3  | 11 | 125774092/125774090/125774447/125774406/125774311/125774082                     | 6 | cg01736784/cg04609163/cg11413039/cg19792599/cg22097425/cg23727983                                  | 0.459958998 | 0.547179494 | 0.654676633 | 0.194717635  | 8.88E-11 | 2.24E-09   |
| TSS1500 | QKI   | 6  | 163834924/16383452/163834872/163834903/163835251/163835395/163834176/163835117  | 8 | cg00852768/cg07618175/cg08169901/cg09854653/cg13695877/cg20930060/cg23954057/cg25157874            | 0.087814187 | 0.144904504 | 0.300689284 | 0.212875097  | 3.27E-05 | 0.00010736 |
| TSS1500 | QPCT  | 2  | 37570604/37571401/37571178                                                      | 3 | cg00881168/cg08240529/cg09386458                                                                   | 0.829521905 | 0.758092957 | 0.675023062 | -0.154498843 | 8.14E-08 | 5.31E-07   |
| TSS1500 | RAB20 | 13 | 111215148/11121457/111214541                                                    | 3 | cg12386015/cg12736438/cg17935813                                                                   | 0.615138495 | 0.517934717 | 0.409811273 | -0.205327222 | 5.68E-08 | 3.89E-07   |
| TSS1500 | RAB31 | 18 | 9708009/9707896/9707753/9707031                                                 | 4 | cg13462028/cg17982102/cg18456459/cg27298007                                                        | 0.370245541 | 0.461836787 | 0.549050938 | 0.178805398  | 8.77E-09 | 7.93E-08   |

|         |         |    |                                                                                                                                     |    |                                                                                                                                                                 |             |             |             |              |          |          |
|---------|---------|----|-------------------------------------------------------------------------------------------------------------------------------------|----|-----------------------------------------------------------------------------------------------------------------------------------------------------------------|-------------|-------------|-------------|--------------|----------|----------|
| TSS1500 | RAB36   | 22 | 23486678/2348704<br>8/23487027/23487104                                                                                             | 4  | cg05366982/cg14497<br>203/cg15450768/cg2<br>0721738                                                                                                             | 0.427684495 | 0.318629989 | 0.246558759 | -0.181125736 | 1.28E-12 | 1.65E-10 |
| TSS1500 | RABEPK  | 9  | 127962544/127961<br>717/127962481                                                                                                   | 3  | cg01211109/cg14222<br>630/cg26753512                                                                                                                            | 0.577314585 | 0.481293378 | 0.352772273 | -0.224542312 | 1.87E-08 | 1.50E-07 |
| TSS1500 | RAD18   | 3  | 9005400/9006242/9<br>005405/9005479                                                                                                 | 4  | cg01884537/cg03287<br>469/cg21902095/cg2<br>2371859                                                                                                             | 0.478882823 | 0.344610822 | 0.25333239  | -0.225550432 | 1.73E-12 | 2.01E-10 |
| TSS1500 | RAD21L1 | 20 | 1205357/1206255/1<br>205378                                                                                                         | 3  | cg00435238/cg15575<br>222/cg27346545                                                                                                                            | 0.588269413 | 0.475656622 | 0.39385462  | -0.194414792 | 1.62E-08 | 1.33E-07 |
| TSS1500 | RALYL   | 8  | 85096037/8509527<br>5/85094904/850968<br>35/85094923/85094<br>842/85094742/8509<br>4437/85096015/850<br>96868/85095654/85<br>095697 | 12 | cg00034076/cg00266<br>009/cg01134282/cg0<br>1538821/cg06955749<br>/cg08327106/cg0975<br>7712/cg11089595/cg<br>22403811/cg2345855<br>8/cg23777958/cg266<br>69044 | 0.27086144  | 0.310675616 | 0.502710953 | 0.231849513  | 2.98E-07 | 1.66E-06 |
| TSS1500 | RAMP3   | 7  | 45196849/4519650<br>1/45196262                                                                                                      | 3  | cg02792877/cg09314<br>155/cg27027655                                                                                                                            | 0.592349285 | 0.513128228 | 0.417991629 | -0.174357656 | 5.48E-10 | 8.55E-09 |
| TSS1500 | RANBP17 | 5  | 170288757/170288<br>766/170288255/170<br>288742                                                                                     | 4  | cg01579024/cg02091<br>185/cg05742691/cg0<br>8358803                                                                                                             | 0.631094554 | 0.527023968 | 0.472358027 | -0.158736526 | 1.71E-08 | 1.39E-07 |
| TSS1500 | RASAL1  | 12 | 113574276/113574<br>368/113575128                                                                                                   | 3  | cg08865522/cg16890<br>739/cg24109790                                                                                                                            | 0.556637685 | 0.394471098 | 0.306957808 | -0.249679877 | 2.58E-13 | 7.42E-11 |
| TSS1500 | RAX     | 18 | 56941706/5694147<br>3/56942066/569412<br>46                                                                                         | 4  | cg00814752/cg03671<br>802/cg06620569/cg2<br>7189087                                                                                                             | 0.284265084 | 0.355136394 | 0.461853657 | 0.177588573  | 1.13E-06 | 5.29E-06 |
| TSS1500 | REG1P   | 2  | 79366964/7936605<br>9/79365892                                                                                                      | 3  | cg00689213/cg02657<br>641/cg15359390                                                                                                                            | 0.37879362  | 0.265920872 | 0.213292559 | -0.165501061 | 3.59E-12 | 3.11E-10 |
| TSS1500 | REG4    | 1  | 120355361/120354<br>655/120354772/120<br>354493                                                                                     | 4  | cg06832956/cg11958<br>962/cg15138570/cg1<br>9736110                                                                                                             | 0.811452353 | 0.725142541 | 0.594490276 | -0.216962078 | 5.42E-07 | 2.80E-06 |
| TSS1500 | REP15   | 12 | 27848523                                                                                                                            | 1  | cg14128259                                                                                                                                                      | 0.4861896   | 0.380428489 | 0.29947025  | -0.18671935  | 1.19E-08 | 1.03E-07 |
| TSS1500 | RESP18  | 2  | 220199185/220199<br>208/220199310                                                                                                   | 3  | cg00793981/cg19020<br>434/cg23985420                                                                                                                            | 0.719000508 | 0.621389361 | 0.522786091 | -0.196214417 | 1.15E-06 | 5.37E-06 |
| TSS1500 | RETN    | 19 | 7733401/7733174                                                                                                                     | 2  | cg08132525/cg20692<br>181                                                                                                                                       | 0.76756135  | 0.681919586 | 0.611314436 | -0.156246914 | 7.26E-11 | 1.93E-09 |
| TSS1500 | RETNLB  | 3  | 108476878/108476<br>540                                                                                                             | 2  | cg00003965/cg05163<br>071                                                                                                                                       | 0.452974965 | 0.345343956 | 0.277469041 | -0.175505924 | 2.18E-10 | 4.30E-09 |

|         |           |    |                                                                |   |                                                                              |             |             |             |              |             |             |
|---------|-----------|----|----------------------------------------------------------------|---|------------------------------------------------------------------------------|-------------|-------------|-------------|--------------|-------------|-------------|
| TSS1500 | RFTN2     | 2  | 198541655/198541772                                            | 2 | cg00826638/cg22387019                                                        | 0.729523938 | 0.550981583 | 0.404589005 | -0.324934933 | 2.97E-12    | 2.76E-10    |
| TSS1500 | RGS21     | 1  | 192285333                                                      | 1 | cg00158654                                                                   | 0.79529358  | 0.666336306 | 0.512647895 | -0.282645685 | 1.22E-09    | 1.61E-08    |
| TSS1500 | RGS5      | 1  | 163173262                                                      | 1 | cg02579477                                                                   | 0.720273725 | 0.600141856 | 0.493346264 | -0.226927461 | 2.45E-06    | 1.05E-05    |
| TSS1500 | RGS6      | 14 | 72398920/72399553/72398856/72398839                            | 4 | cg14702655/cg15457745/cg16396954/cg23576118                                  | 0.132310638 | 0.143585694 | 0.298340158 | 0.16602952   | 9.34E-05    | 0.000278028 |
| TSS1500 | RGS7BP    | 5  | 63801834/63801893/63802184/63802106/63801847                   | 5 | cg03827337/cg05455931/cg08709073/cg12158471/cg14864853                       | 0.289337943 | 0.367243305 | 0.480519267 | 0.191181324  | 7.12E-06    | 2.71E-05    |
| TSS1500 | RGS8      | 1  | 182643158/182643312/182642748                                  | 3 | cg06894198/cg16349160/cg17124700                                             | 0.778956495 | 0.695825594 | 0.626056682 | -0.152899813 | 6.88E-09    | 6.46E-08    |
| TSS1500 | RIC3      | 11 | 8190837/8190834/8190822                                        | 3 | cg01560972/cg06327746/cg15524336                                             | 0.424478423 | 0.495988111 | 0.601982407 | 0.177503984  | 3.77E-10    | 6.47E-09    |
| TSS1500 | RIMS2     | 8  | 104512423/104512168/104512317/104511776                        | 4 | cg03350814/cg16648062/cg20129213/cg20426946                                  | 0.150552628 | 0.175882172 | 0.315339034 | 0.164786406  | 0.000544913 | 0.001376721 |
| TSS1500 | RNASE1    | 14 | 21270924/21270850/21271148/21271313/21271355/21271018/21272532 | 7 | cg05958352/cg08122234/cg12940993/cg13718960/cg18832407/cg18836485/cg21908129 | 0.596407348 | 0.514317372 | 0.437191112 | -0.159216236 | 3.35E-11    | 1.18E-09    |
| TSS1500 | RNASE11   | 14 | 21059287/21058901                                              | 2 | cg06760771/cg19937577                                                        | 0.724848255 | 0.615646178 | 0.483483082 | -0.241365173 | 2.42E-08    | 1.87E-07    |
| TSS1500 | RNASE12   | 14 | 21060022/21060292/21059287/21060349                            | 4 | cg02647684/cg04957177/cg06760771/cg14149503                                  | 0.753956926 | 0.649277086 | 0.51817454  | -0.235782386 | 2.56E-11    | 9.78E-10    |
| TSS1500 | RND1      | 12 | 49261012/49259997                                              | 2 | cg04640834/cg22514963                                                        | 0.611850365 | 0.476849194 | 0.376277832 | -0.235572533 | 3.06E-11    | 1.11E-09    |
| TSS1500 | ROBO3     | 11 | 124735089/124734412                                            | 2 | cg10680051/cg12398330                                                        | 0.291793068 | 0.32671232  | 0.449011244 | 0.157218177  | 7.68E-07    | 3.80E-06    |
| TSS1500 | RPL13AP17 | 7  | 77975971/77975491                                              | 2 | cg09196534/cg11407989                                                        | 0.487634405 | 0.40765795  | 0.326397282 | -0.161237123 | 2.63E-10    | 4.94E-09    |
| TSS1500 | RPL19P12  | 7  | 102783873/102784027/102784228                                  | 3 | cg01946097/cg10767164/cg20256707                                             | 0.682760178 | 0.580220717 | 0.495319661 | -0.187440516 | 6.30E-11    | 1.75E-09    |
| TSS1500 | RPL31P11  | 1  | 161655895                                                      | 1 | cg22445346                                                                   | 0.748590945 | 0.614487478 | 0.448657486 | -0.299933459 | 4.03E-10    | 6.77E-09    |
| TSS1500 | RPL39L    | 3  | 186857475/186857593/186857537                                  | 3 | cg07441272/cg07681728/cg13432744                                             | 0.118771249 | 0.177451184 | 0.313922096 | 0.195150847  | 0.00043417  | 0.001118069 |
| TSS1500 | RPTN      | 1  | 152132853/152132450/152132592                                  | 3 | cg05765254/cg11535506/cg25304681                                             | 0.707785727 | 0.570031028 | 0.490223189 | -0.217562537 | 4.87E-09    | 4.94E-08    |
| TSS1500 | RRN3P2    | 16 | 29084744/29085130                                              | 2 | cg00525931/cg00821510                                                        | 0.600590285 | 0.488272594 | 0.4472372   | -0.153353085 | 4.76E-07    | 2.50E-06    |

|         |       |    |                                                                                                                        |    |                                                                                                                                                  |             |             |             |              |             |             |
|---------|-------|----|------------------------------------------------------------------------------------------------------------------------|----|--------------------------------------------------------------------------------------------------------------------------------------------------|-------------|-------------|-------------|--------------|-------------|-------------|
| TSS1500 | RRP7A | 22 | 42917251/4291633<br>2                                                                                                  | 2  | cg04222463/cg19987<br>256                                                                                                                        | 0.508316435 | 0.388638333 | 0.335987332 | -0.172329103 | 3.36E-09    | 3.63E-08    |
| TSS1500 | RSPO1 | 1  | 38100826/3810083<br>7/38100811/381016<br>52/38100795/38101<br>266                                                      | 6  | cg03654735/cg10573<br>018/cg12391690/cg1<br>7161617/cg22063989<br>/cg26519919                                                                    | 0.242804174 | 0.331854258 | 0.425898634 | 0.18309446   | 2.44E-05    | 8.25E-05    |
| TSS1500 | RSPO4 | 20 | 983130/983354                                                                                                          | 2  | cg17870408/cg26515<br>460                                                                                                                        | 0.11937369  | 0.133190122 | 0.277627904 | 0.158254214  | 0.000682277 | 0.001687111 |
| TSS1500 | RTKN  | 2  | 74668477/7466807<br>2/74669380/746686<br>72/74669349/74668<br>976/74668286/7466<br>9375/74669516/746<br>69387/74669048 | 11 | cg00326131/cg00610<br>692/cg00658082/cg0<br>0689340/cg03295928<br>/cg03719070/cg0969<br>2695/cg14481208/cg<br>19515035/cg2609007<br>2/cg26676034 | 0.460440434 | 0.384269086 | 0.307391244 | -0.15304919  | 4.62E-10    | 7.51E-09    |
| TSS1500 | RXFP1 | 4  | 159442782/159441<br>687                                                                                                | 2  | cg03875996/cg24035<br>112                                                                                                                        | 0.460707315 | 0.379733394 | 0.296914514 | -0.163792801 | 6.68E-09    | 6.33E-08    |
| TSS1500 | RXFP3 | 5  | 33936262/3393625<br>3/33935027/339361<br>71/33936232                                                                   | 5  | cg00981837/cg07832<br>473/cg08709576/cg1<br>0795738/cg18689958                                                                                   | 0.184337113 | 0.239851174 | 0.341022532 | 0.156685419  | 0.000643651 | 0.001599139 |
| TSS1500 | RXFP4 | 1  | 155910958/155911<br>238/155910526/155<br>910967/155910523                                                              | 5  | cg04233230/cg08403<br>419/cg21284779/cg2<br>2863889/cg25214914                                                                                   | 0.496143702 | 0.41149893  | 0.337757391 | -0.158386311 | 2.52E-10    | 4.80E-09    |
| TSS1500 | RYR2  | 1  | 237205295/237205<br>174/237205409/237<br>205098                                                                        | 4  | cg03422911/cg07790<br>615/cg18375860/cg1<br>9764418                                                                                              | 0.452385778 | 0.41005682  | 0.648201086 | 0.195815309  | 1.95E-06    | 8.57E-06    |
| TSS1500 | RYR3  | 15 | 33602817/3360282<br>4/33602821/336027<br>58                                                                            | 4  | cg02186782/cg11789<br>740/cg12860391/cg2<br>1413325                                                                                              | 0.37828397  | 0.469135644 | 0.598814657 | 0.220530687  | 2.19E-10    | 4.32E-09    |
| TSS1500 | S100P | 4  | 6694923/6695203/6<br>695319                                                                                            | 3  | cg02883621/cg14323<br>984/cg27027375                                                                                                             | 0.725823043 | 0.578028219 | 0.436999474 | -0.288823569 | 5.87E-11    | 1.67E-09    |
| TSS1500 | S1PR4 | 19 | 3178413/3178512/3<br>177310                                                                                            | 3  | cg02716776/cg02996<br>471/cg20656868                                                                                                             | 0.450700283 | 0.372951108 | 0.29506796  | -0.155632323 | 9.48E-06    | 3.51E-05    |
| TSS1500 | SAAL1 | 11 | 18128177/1812795<br>8/18128126                                                                                         | 3  | cg00345366/cg05093<br>315/cg12377368                                                                                                             | 0.564864755 | 0.476098867 | 0.385892909 | -0.178971846 | 5.34E-12    | 3.81E-10    |



|         |         |    |                                                                                                                                                                                                                                          |    |                                                                                                                                                                                                                                                                                        |             |             |             |              |             |             |
|---------|---------|----|------------------------------------------------------------------------------------------------------------------------------------------------------------------------------------------------------------------------------------------|----|----------------------------------------------------------------------------------------------------------------------------------------------------------------------------------------------------------------------------------------------------------------------------------------|-------------|-------------|-------------|--------------|-------------|-------------|
| TSS1500 | SALL1   | 16 | 51185039/5118626<br>6/51185346/511851<br>47/51185672/51184<br>786/51185407/5118<br>6211/51185132/511<br>85236/51185082/51<br>185459/51184886/5<br>1185461/51185060/<br>51186260/5118500<br>1/51185110/511857<br>72/51185394/51186<br>463 | 21 | cg00124695/cg00177<br>451/cg00310215/cg0<br>1146232/cg01500945<br>/cg05151154/cg0521<br>3609/cg05404010/cg<br>06232807/cg0627467<br>1/cg06653699/cg067<br>24588/cg07498275/c<br>g07502439/cg084399<br>30/cg08776356/cg08<br>806408/cg09016242/<br>cg13755795/cg22674<br>717/cg27423760 | 0.33784132  | 0.431377988 | 0.58118652  | 0.2433452    | 3.03E-09    | 3.35E-08    |
| TSS1500 | SALL3   | 18 | 76739409/7673922<br>6/76739559/767389<br>99                                                                                                                                                                                              | 4  | cg05080154/cg13634<br>602/cg16580499/cg2<br>1779611                                                                                                                                                                                                                                    | 0.227578384 | 0.312004714 | 0.426567904 | 0.198989519  | 1.33E-10    | 2.98E-09    |
| TSS1500 | SCARF2  | 22 | 20792476/2079253<br>5                                                                                                                                                                                                                    | 2  | cg08748948/cg14785<br>479                                                                                                                                                                                                                                                              | 0.279022718 | 0.351433703 | 0.511275693 | 0.232252976  | 2.37E-07    | 1.36E-06    |
| TSS1500 | SCEL    | 13 | 78109017/7810837<br>4/78108474                                                                                                                                                                                                           | 3  | cg11215283/cg19734<br>822/cg26389381                                                                                                                                                                                                                                                   | 0.682622005 | 0.571589861 | 0.474082948 | -0.208539057 | 4.94E-12    | 3.63E-10    |
| TSS1500 | SCGB1D1 | 11 | 61956390/6195652<br>3/61956860                                                                                                                                                                                                           | 3  | cg04011620/cg14980<br>165/cg26907473                                                                                                                                                                                                                                                   | 0.792025305 | 0.700007933 | 0.624008441 | -0.168016864 | 4.69E-05    | 0.000148801 |
| TSS1500 | SCGB1D2 | 11 | 62009065/6200894<br>9                                                                                                                                                                                                                    | 2  | cg10848367/cg19015<br>654                                                                                                                                                                                                                                                              | 0.418597895 | 0.333634672 | 0.244493755 | -0.17410414  | 2.99E-13    | 7.87E-11    |
| TSS1500 | SCN3A   | 2  | 166061599/166061<br>891                                                                                                                                                                                                                  | 2  | cg03180819/cg17754<br>914                                                                                                                                                                                                                                                              | 0.64390047  | 0.524578964 | 0.404113411 | -0.239787059 | 4.95E-13    | 9.21E-11    |
| TSS1500 | SCN4A   | 17 | 62051709/6205177<br>3/62051767                                                                                                                                                                                                           | 3  | cg05818824/cg14258<br>078/cg25507121                                                                                                                                                                                                                                                   | 0.500798332 | 0.406223619 | 0.316439573 | -0.184358759 | 1.35E-11    | 6.42E-10    |
| TSS1500 | SCN7A   | 2  | 167343774/167344<br>555                                                                                                                                                                                                                  | 2  | cg05331214/cg06746<br>492                                                                                                                                                                                                                                                              | 0.803588825 | 0.729972667 | 0.646842091 | -0.156746734 | 0.000715033 | 0.001758756 |
| TSS1500 | SCNN1B  | 16 | 23313148/2331329<br>5/23313293/233132<br>40                                                                                                                                                                                              | 4  | cg00925717/cg03102<br>879/cg23113963/cg2<br>6590082                                                                                                                                                                                                                                    | 0.40002322  | 0.47441955  | 0.600356732 | 0.200333512  | 9.67E-07    | 4.64E-06    |
| TSS1500 | SCRN2   | 17 | 45919287/4591900<br>4/45919419                                                                                                                                                                                                           | 3  | cg01390728/cg10924<br>080/cg11242907                                                                                                                                                                                                                                                   | 0.735759298 | 0.645223169 | 0.577818033 | -0.157941265 | 1.26E-08    | 1.08E-07    |
| TSS1500 | SDR9C7  | 12 | 57329353/5732840<br>6/57328644                                                                                                                                                                                                           | 3  | cg12524061/cg13446<br>622/cg20596724                                                                                                                                                                                                                                                   | 0.624260958 | 0.487108706 | 0.37423312  | -0.250027837 | 1.19E-12    | 1.60E-10    |
| TSS1500 | SEC14L4 | 22 | 30902615/3090264<br>2                                                                                                                                                                                                                    | 2  | cg14324805/cg20436<br>912                                                                                                                                                                                                                                                              | 0.70924878  | 0.5795005   | 0.464872736 | -0.244376044 | 3.18E-10    | 5.71E-09    |
| TSS1500 | SEC16B  | 1  | 177939546/177939<br>251/177939484                                                                                                                                                                                                        | 3  | cg02289040/cg25135<br>333/cg27451587                                                                                                                                                                                                                                                   | 0.475520343 | 0.364833392 | 0.286121564 | -0.189398779 | 6.68E-11    | 1.82E-09    |

|         |           |    |                                                      |   |                                                                |             |             |             |              |          |          |
|---------|-----------|----|------------------------------------------------------|---|----------------------------------------------------------------|-------------|-------------|-------------|--------------|----------|----------|
| TSS1500 | SEL1L2    | 20 | 13971811/1397202<br>2                                | 2 | cg10640284/cg18690<br>833                                      | 0.663615808 | 0.592615739 | 0.493940532 | -0.169675276 | 4.88E-09 | 4.95E-08 |
| TSS1500 | SELENBP1  | 1  | 151345771/151346<br>048/151346122/151<br>346400      | 4 | cg00978415/cg07916<br>011/cg16911672/cg1<br>7759475            | 0.583955216 | 0.482675893 | 0.401884319 | -0.182070897 | 7.24E-11 | 1.93E-09 |
| TSS1500 | SELP      | 1  | 169600704/169599<br>754                              | 2 | cg05343289/cg17167<br>832                                      | 0.672707098 | 0.601581661 | 0.498938002 | -0.173769095 | 1.78E-11 | 7.71E-10 |
| TSS1500 | SEMA3C    | 7  | 80549660/8054917<br>1                                | 2 | cg08799727/cg09225<br>287                                      | 0.354210555 | 0.250496138 | 0.18889342  | -0.165317135 | 1.52E-12 | 1.86E-10 |
| TSS1500 | SEMA6B    | 19 | 4558718/4559799/4<br>558740                          | 3 | cg06746744/cg12941<br>931/cg23957285                           | 0.481234883 | 0.407950294 | 0.309337705 | -0.171897179 | 4.08E-07 | 2.18E-06 |
| TSS1500 | SERPINB12 | 18 | 61222687/6122206<br>4                                | 2 | cg11435943/cg12412<br>154                                      | 0.63696564  | 0.552976661 | 0.437255214 | -0.199710426 | 5.02E-08 | 3.50E-07 |
| TSS1500 | SERPINB13 | 18 | 61253151/6125384<br>7                                | 2 | cg01056135/cg06538<br>870                                      | 0.69047051  | 0.579388286 | 0.489712689 | -0.200757821 | 2.32E-09 | 2.69E-08 |
| TSS1500 | SERPINB4  | 18 | 61312477/6131236<br>7                                | 2 | cg03294557/cg25485<br>091                                      | 0.436330985 | 0.359068656 | 0.280836127 | -0.155494858 | 3.23E-12 | 2.88E-10 |
| TSS1500 | SERPINI2  | 3  | 167193257                                            | 1 | cg11375831                                                     | 0.705032655 | 0.641912456 | 0.5387208   | -0.166311855 | 1.16E-05 | 4.23E-05 |
| TSS1500 | SFMBT2    | 10 | 7454561/7453871/7<br>454759/7454063                  | 4 | cg02353184/cg03031<br>609/cg03237648/cg0<br>6352406            | 0.228107157 | 0.354522398 | 0.491777277 | 0.26367012   | 8.57E-08 | 5.54E-07 |
| TSS1500 | SFN       | 1  | 27189270/2718850<br>5/27189298/271885<br>87/27189349 | 5 | cg11348165/cg13235<br>717/cg14333454/cg1<br>6549596/cg21950166 | 0.460494623 | 0.367894009 | 0.303945274 | -0.156549349 | 1.46E-11 | 6.74E-10 |

|         |        |    |                                                                                                                                                                                                                                                                                                                                                                                 |    |                                                                                                                                                                                                                                                                                                                                                                                                                   |             |             |             |              |          |          |
|---------|--------|----|---------------------------------------------------------------------------------------------------------------------------------------------------------------------------------------------------------------------------------------------------------------------------------------------------------------------------------------------------------------------------------|----|-------------------------------------------------------------------------------------------------------------------------------------------------------------------------------------------------------------------------------------------------------------------------------------------------------------------------------------------------------------------------------------------------------------------|-------------|-------------|-------------|--------------|----------|----------|
| TSS1500 | SFRP2  | 4  | 154710796/154711<br>183/154711457/154<br>711347/154711675/<br>154710750/154711<br>563/154711519/154<br>710523/154710961/<br>154711081/154711<br>629/154711597/154<br>710429/154711171/<br>154711512/154710<br>475/154711070/154<br>711280/154710826/<br>154711304/154711<br>470/154710499/154<br>710535/154711115/<br>154710873/154710<br>900/154711099/154<br>711620/154710598 | 30 | cg00082664/cg00705<br>808/cg01298731/cg0<br>1821854/cg04959480<br>/cg04965141/cg0505<br>0042/cg05241277/cg<br>05961809/cg0799984<br>5/cg09788843/cg106<br>63078/cg10790791/c<br>g10942078/cg133572<br>29/cg13732865/cg14<br>289246/cg14435644/<br>cg20727217/cg20881<br>942/cg21630608/cg2<br>1657059/cg22178613<br>/cg23207990/cg2350<br>2475/cg23714408/cg<br>23910835/cg2424192<br>8/cg24968721/cg256<br>45268 | 0.38689186  | 0.434917837 | 0.539214983 | 0.152323124  | 5.37E-06 | 2.11E-05 |
| TSS1500 | SFT2D3 | 2  | 128458281/128457<br>218/128458240/128<br>458248                                                                                                                                                                                                                                                                                                                                 | 4  | cg03339817/cg15127<br>867/cg20154206/cg2<br>4925163                                                                                                                                                                                                                                                                                                                                                               | 0.555468707 | 0.472033541 | 0.371775474 | -0.183693232 | 5.81E-08 | 3.96E-07 |
| TSS1500 | SFTPA1 | 10 | 81370414/8136942<br>6/81370291                                                                                                                                                                                                                                                                                                                                                  | 3  | cg01134967/cg17410<br>079/cg27452691                                                                                                                                                                                                                                                                                                                                                                              | 0.609497265 | 0.535546654 | 0.444298668 | -0.165198597 | 4.81E-09 | 4.90E-08 |
| TSS1500 | SGCD   | 5  | 155752506                                                                                                                                                                                                                                                                                                                                                                       | 1  | cg24795745                                                                                                                                                                                                                                                                                                                                                                                                        | 0.67582789  | 0.547530106 | 0.402935255 | -0.272892635 | 5.81E-11 | 1.67E-09 |
| TSS1500 | SGCZ   | 8  | 15096879/1509677<br>4                                                                                                                                                                                                                                                                                                                                                           | 2  | cg09766556/cg20596<br>629                                                                                                                                                                                                                                                                                                                                                                                         | 0.49802097  | 0.428804461 | 0.315799741 | -0.182221229 | 5.08E-11 | 1.56E-09 |
| TSS1500 | SGOL1  | 3  | 20228976/2022794<br>0/20227925                                                                                                                                                                                                                                                                                                                                                  | 3  | cg00235661/cg02114<br>449/cg22604940                                                                                                                                                                                                                                                                                                                                                                              | 0.42658549  | 0.327688083 | 0.261436877 | -0.165148613 | 1.75E-08 | 1.42E-07 |
| TSS1500 | SH2D2A | 1  | 156786653/156786<br>643/156786601                                                                                                                                                                                                                                                                                                                                               | 3  | cg12039611/cg12499<br>211/cg20839149                                                                                                                                                                                                                                                                                                                                                                              | 0.457687128 | 0.351473181 | 0.267618898 | -0.19006823  | 2.11E-08 | 1.66E-07 |
| TSS1500 | SH2D4A | 8  | 19170250/1917043<br>2/19170080/191708<br>90                                                                                                                                                                                                                                                                                                                                     | 4  | cg03138955/cg09140<br>851/cg14936266/cg2<br>2708914                                                                                                                                                                                                                                                                                                                                                               | 0.4777416   | 0.390207311 | 0.314751147 | -0.162990453 | 7.02E-12 | 4.53E-10 |
| TSS1500 | SH3TC2 | 5  | 148443744/148443<br>366                                                                                                                                                                                                                                                                                                                                                         | 2  | cg09548638/cg13018<br>402                                                                                                                                                                                                                                                                                                                                                                                         | 0.56922699  | 0.4492207   | 0.381051241 | -0.188175749 | 7.03E-11 | 1.89E-09 |
| TSS1500 | SHE    | 1  | 154475139/154475<br>068/154475173/154<br>475269/154475688/<br>154474800                                                                                                                                                                                                                                                                                                         | 6  | cg02457680/cg05637<br>536/cg18081940/cg1<br>9360104/cg24889998<br>/cg25460143                                                                                                                                                                                                                                                                                                                                     | 0.434378221 | 0.481532957 | 0.597734064 | 0.163355843  | 3.04E-09 | 3.36E-08 |

|         |          |    |                                                                                                               |   |                                                                                                                        |             |             |             |              |          |          |
|---------|----------|----|---------------------------------------------------------------------------------------------------------------|---|------------------------------------------------------------------------------------------------------------------------|-------------|-------------|-------------|--------------|----------|----------|
| TSS1500 | SHISA2   | 13 | 26626092/2662666<br>3/26625766/266261<br>34                                                                   | 4 | cg02126117/cg07984<br>168/cg16572375/cg2<br>0193324                                                                    | 0.304890892 | 0.349902814 | 0.460093257 | 0.155202365  | 2.64E-05 | 8.86E-05 |
| TSS1500 | SHISA7   | 19 | 55954973/5595529<br>2/55954621                                                                                | 3 | cg01641455/cg02852<br>989/cg10638599                                                                                   | 0.180670474 | 0.250233824 | 0.38234927  | 0.201678796  | 2.12E-07 | 1.23E-06 |
| TSS1500 | SHISA9   | 16 | 12994049/1299501<br>1/12995078/129949<br>98                                                                   | 4 | cg02748479/cg09229<br>683/cg21432375/cg2<br>6752526                                                                    | 0.225686592 | 0.278124102 | 0.430683681 | 0.204997089  | 1.02E-05 | 3.76E-05 |
| TSS1500 | SIGLEC1  | 20 | 3687992/3689084/3<br>688314                                                                                   | 3 | cg02288165/cg03478<br>070/cg15271461                                                                                   | 0.783227098 | 0.700512417 | 0.614492255 | -0.168734843 | 4.59E-07 | 2.42E-06 |
| TSS1500 | SIGLEC11 | 19 | 50464713/5046478<br>1/50464887                                                                                | 3 | cg03283694/cg22187<br>733/cg24311282                                                                                   | 0.68402912  | 0.611325391 | 0.50186635  | -0.18216277  | 1.12E-11 | 5.66E-10 |
| TSS1500 | SIGLEC8  | 19 | 51961937/5196233<br>8                                                                                         | 2 | cg02427831/cg27040<br>525                                                                                              | 0.589162065 | 0.44700045  | 0.371387741 | -0.217774324 | 2.06E-11 | 8.38E-10 |
| TSS1500 | SIGLECP3 | 19 | 51670251/5167031<br>5/51669595                                                                                | 3 | cg02018326/cg08861<br>404/cg22658316                                                                                   | 0.433519667 | 0.355606472 | 0.263784859 | -0.169734808 | 6.32E-12 | 4.16E-10 |
| TSS1500 | SIM1     | 6  | 100911949/100912<br>072/100913030/100<br>912946/100911964/<br>100912822/100912<br>906/100912168/100<br>912940 | 9 | cg01258751/cg11540<br>692/cg12233363/cg1<br>7380661/cg17942121<br>/cg18528367/cg2168<br>4012/cg26966124/cg<br>27252696 | 0.290137441 | 0.33962136  | 0.480856492 | 0.190719051  | 9.16E-06 | 3.40E-05 |
| TSS1500 | SIRPG    | 20 | 1639325/1639816/1<br>639250                                                                                   | 3 | cg11061975/cg13408<br>605/cg23295754                                                                                   | 0.702641013 | 0.50884555  | 0.339862545 | -0.362778467 | 1.83E-15 | 8.67E-12 |
| TSS1500 | SLC10A5  | 8  | 82608057/8260750<br>5/82608298                                                                                | 3 | cg00161955/cg02573<br>176/cg26164767                                                                                   | 0.641460465 | 0.571431067 | 0.488673926 | -0.152786539 | 1.80E-11 | 7.71E-10 |
| TSS1500 | SLC10A6  | 4  | 87770782/8777074<br>4                                                                                         | 2 | cg13119182/cg15881<br>238                                                                                              | 0.828922718 | 0.733751794 | 0.566891625 | -0.262031093 | 7.69E-08 | 5.05E-07 |
| TSS1500 | SLC13A5  | 17 | 6617580/6617192/6<br>617470/6617030/66<br>17124                                                               | 5 | cg01974875/cg13545<br>212/cg21872037/cg2<br>2040627/cg26782108                                                         | 0.516337783 | 0.588659689 | 0.6925767   | 0.176238918  | 9.81E-08 | 6.25E-07 |
| TSS1500 | SLC17A2  | 6  | 25931205/2593165<br>9/25931557                                                                                | 3 | cg01936555/cg20765<br>441/cg24163360                                                                                   | 0.6328762   | 0.465428419 | 0.373585605 | -0.259290595 | 2.80E-14 | 2.33E-11 |
| TSS1500 | SLC18A3  | 10 | 50817104/5081721<br>3/50817804/508169<br>63/50816917/50817<br>306/50817810/5081<br>7651/50817096              | 9 | cg05997350/cg06108<br>782/cg08996579/cg1<br>2052765/cg17284779<br>/cg18592174/cg2398<br>7444/cg26813646/cg<br>27500798 | 0.298896711 | 0.373556264 | 0.526404253 | 0.227507542  | 1.30E-07 | 8.01E-07 |

|         |            |    |                                                                                                                                                         |    |                                                                                                                                                                                                                  |             |             |             |              |          |          |
|---------|------------|----|---------------------------------------------------------------------------------------------------------------------------------------------------------|----|------------------------------------------------------------------------------------------------------------------------------------------------------------------------------------------------------------------|-------------|-------------|-------------|--------------|----------|----------|
| TSS1500 | SLC22A14   | 3  | 38346525                                                                                                                                                | 1  | cg27520549                                                                                                                                                                                                       | 0.73062987  | 0.687163794 | 0.572297355 | -0.158332515 | 8.51E-06 | 3.18E-05 |
| TSS1500 | SLC22A18AS | 11 | 2926601/2925768/2925473/2925470/2926361/2926344/2925570/2925969/2925869/2926422/2925594/2925951/2925847/2926143/2925996/2925623/2926337/2925439/2925634 | 19 | cg02025860/cg02390725/cg06048910/cg06495763/cg06669405/cg06981073/cg08472797/cg08827700/cg08999895/cg09731124/cg14101500/cg16530128/cg20716202/cg21991825/cg22272492/cg22833478/cg23912877/cg24724917/cg26137286 | 0.624482738 | 0.534072063 | 0.470561551 | -0.153921187 | 1.49E-12 | 1.84E-10 |
| TSS1500 | SLC22A24   | 11 | 62912823                                                                                                                                                | 1  | cg04426607                                                                                                                                                                                                       | 0.67878832  | 0.516373306 | 0.407864932 | -0.270923388 | 1.22E-08 | 1.05E-07 |
| TSS1500 | SLC22A6    | 11 | 62753561/62753944/62753072                                                                                                                              | 3  | cg03539808/cg04458776/cg12428447                                                                                                                                                                                 | 0.628114222 | 0.523771187 | 0.408429053 | -0.219685169 | 3.84E-13 | 8.04E-11 |
| TSS1500 | SLC24A2    | 9  | 19788317/19788257                                                                                                                                       | 2  | cg14439761/cg14442421                                                                                                                                                                                            | 0.344403925 | 0.468337139 | 0.609366514 | 0.264962589  | 9.20E-09 | 8.26E-08 |
| TSS1500 | SLC24A5    | 15 | 48412241/48411862                                                                                                                                       | 2  | cg09456905/cg24125468                                                                                                                                                                                            | 0.80405332  | 0.686609572 | 0.592618041 | -0.211435279 | 3.63E-07 | 1.97E-06 |
| TSS1500 | SLC25A18   | 22 | 18042722/18042550/18042646                                                                                                                              | 3  | cg00748432/cg04139184/cg04460557                                                                                                                                                                                 | 0.479019123 | 0.407684367 | 0.316667421 | -0.162351702 | 5.61E-12 | 3.93E-10 |
| TSS1500 | SLC27A6    | 5  | 128300967/128300696/128300708                                                                                                                           | 3  | cg00076307/cg20103758/cg20417527                                                                                                                                                                                 | 0.242221315 | 0.30317555  | 0.492429005 | 0.25020769   | 5.63E-06 | 2.20E-05 |
| TSS1500 | SLC28A1    | 15 | 85427348/85426911                                                                                                                                       | 2  | cg08271842/cg12302621                                                                                                                                                                                            | 0.511796785 | 0.4267913   | 0.352837459 | -0.158959326 | 3.69E-11 | 1.26E-09 |
| TSS1500 | SLC2A8     | 9  | 130158144                                                                                                                                               | 1  | cg00114012                                                                                                                                                                                                       | 0.660497665 | 0.519128167 | 0.445666732 | -0.214830933 | 4.74E-11 | 1.50E-09 |
| TSS1500 | SLC30A8    | 8  | 118146418                                                                                                                                               | 1  | cg23338195                                                                                                                                                                                                       | 0.482035695 | 0.366651428 | 0.244319205 | -0.23771649  | 3.36E-13 | 7.87E-11 |
| TSS1500 | SLC32A1    | 20 | 37352792/37352612/37352085/37351945                                                                                                                     | 4  | cg03556497/cg08535373/cg15490840/cg19675084                                                                                                                                                                      | 0.267058138 | 0.353513704 | 0.476395385 | 0.209337247  | 1.80E-09 | 2.18E-08 |
| TSS1500 | SLC35B3    | 6  | 8436296/8436218/8436263/8436466                                                                                                                         | 4  | cg02152351/cg09548084/cg12178445/cg15983580                                                                                                                                                                      | 0.569324571 | 0.486138297 | 0.399614758 | -0.169709813 | 8.74E-09 | 7.91E-08 |
| TSS1500 | SLC35B4    | 7  | 134003124/134002145/134002209                                                                                                                           | 3  | cg02659138/cg02820759/cg27581047                                                                                                                                                                                 | 0.71033233  | 0.543116639 | 0.410342268 | -0.299990062 | 4.49E-11 | 1.44E-09 |
| TSS1500 | SLC35D2    | 9  | 99146400                                                                                                                                                | 1  | cg13771161                                                                                                                                                                                                       | 0.411161746 | 0.310505806 | 0.260671868 | -0.150945592 | 7.53E-09 | 6.97E-08 |
| TSS1500 | SLC35F4    | 14 | 58064926/58064661/58064775                                                                                                                              | 3  | cg01702210/cg20038225/cg21168134                                                                                                                                                                                 | 0.676928443 | 0.601172564 | 0.487351205 | -0.189577238 | 3.30E-07 | 1.81E-06 |

|         |         |    |                                                                                |   |                                                                                         |             |             |             |              |          |          |
|---------|---------|----|--------------------------------------------------------------------------------|---|-----------------------------------------------------------------------------------------|-------------|-------------|-------------|--------------|----------|----------|
| TSS1500 | SLC36A2 | 5  | 150727812/150727459/150728626/1504728369                                       | 4 | cg10345936/cg22505977/cg23502298/cg24780796                                             | 0.419857938 | 0.324556026 | 0.260306089 | -0.159551849 | 1.86E-09 | 2.25E-08 |
| TSS1500 | SLC38A3 | 3  | 50241300/50242325                                                              | 2 | cg00390253/cg15335139                                                                   | 0.568906938 | 0.505776369 | 0.418390309 | -0.150516628 | 2.79E-07 | 1.57E-06 |
| TSS1500 | SLC39A4 | 8  | 145643535/14564295/145642456/145642243/145642291/145642421/145643083/145643626 | 8 | cg03453890/cg04803798/cg05574324/cg06700234/cg11800672/cg12503742/cg12676500/cg20259557 | 0.534995386 | 0.428679607 | 0.339464564 | -0.195530823 | 8.97E-12 | 5.08E-10 |
| TSS1500 | SLC44A5 | 1  | 76078176/76077832/76078230                                                     | 3 | cg12659128/cg17755518/cg27336379                                                        | 0.740184425 | 0.66982192  | 0.563821165 | -0.17636326  | 7.46E-06 | 2.82E-05 |
| TSS1500 | SLC4A1  | 17 | 42346894/42346923                                                              | 2 | cg04433322/cg16464328                                                                   | 0.484415493 | 0.383630533 | 0.301240068 | -0.183175424 | 1.49E-10 | 3.23E-09 |
| TSS1500 | SLC5A4  | 22 | 32651693/32651562/32651776                                                     | 3 | cg01337931/cg09244200/cg22027471                                                        | 0.622292395 | 0.539065925 | 0.46364093  | -0.158651465 | 1.85E-05 | 6.43E-05 |
| TSS1500 | SLC6A1  | 3  | 11033866/11033246/11034013/11033977                                            | 4 | cg00375819/cg01078332/cg07646731/cg08072251                                             | 0.39186199  | 0.262314478 | 0.188607636 | -0.203254354 | 2.68E-14 | 2.33E-11 |
| TSS1500 | SLC6A11 | 3  | 10857688/10857703/10857456/10857699                                            | 4 | cg00605982/cg07744841/cg09395732/cg18290624                                             | 0.467192398 | 0.543815768 | 0.647508145 | 0.180315748  | 2.98E-11 | 1.09E-09 |
| TSS1500 | SLC6A15 | 12 | 85306916/85307131/85307152/85306854/85307424/85306828/85307080                 | 7 | cg03064067/cg07811110/cg08143343/cg08254307/cg09892273/cg18023283/cg19686001            | 0.434885071 | 0.518090029 | 0.629540763 | 0.194655692  | 1.21E-08 | 1.04E-07 |
| TSS1500 | SLC6A18 | 5  | 1225224/1224256/1225074                                                        | 3 | cg19421752/cg21133868/cg26427908                                                        | 0.785790838 | 0.737902733 | 0.629150873 | -0.156639965 | 2.02E-05 | 6.95E-05 |
| TSS1500 | SLC6A5  | 11 | 20620287/20620181/20619598/20619733/20620089/20620002/20620680                 | 7 | cg03573068/cg04592728/cg09696301/cg11288764/cg11784785/cg24420041/cg27036111            | 0.292496997 | 0.377680645 | 0.456664748 | 0.16416775   | 1.65E-06 | 7.41E-06 |
| TSS1500 | SLC7A14 | 3  | 170304889/170304760/170305197                                                  | 3 | cg07475940/cg11624728/cg24977541                                                        | 0.672917303 | 0.618695489 | 0.507449468 | -0.165467835 | 2.34E-09 | 2.70E-08 |
| TSS1500 | SLC7A9  | 19 | 33361552/33361032/33361317/33361127                                            | 4 | cg05337042/cg05467458/cg08836353/cg16861209                                             | 0.703402151 | 0.613326908 | 0.519409316 | -0.183992835 | 4.69E-10 | 7.59E-09 |
| TSS1500 | SLCO1A2 | 12 | 21488180                                                                       | 1 | cg19659215                                                                              | 0.492274655 | 0.439451306 | 0.325578005 | -0.16669665  | 9.49E-06 | 3.51E-05 |

|         |           |    |                                                                                                               |                                                                                                                        |                                                                                                                                       |             |             |             |              |          |             |
|---------|-----------|----|---------------------------------------------------------------------------------------------------------------|------------------------------------------------------------------------------------------------------------------------|---------------------------------------------------------------------------------------------------------------------------------------|-------------|-------------|-------------|--------------|----------|-------------|
| TSS1500 | SLFN11    | 17 | 33701776/3370135<br>0/33701353/337015 5<br>29/33701321                                                        | cg00080081/cg03668<br>718/cg11309496/cg1<br>3341380/cg18108623                                                         | 0.253235105                                                                                                                           | 0.40114549  | 0.526908069 | 0.273672965 | 8.19E-09     | 7.49E-08 |             |
| TSS1500 | SLFN12    | 17 | 33760527/3375998<br>6/33760293/337602<br>30/33759929/33760 9<br>419/33759965/3376<br>0249/33759957            | cg03237218/cg05174<br>890/cg08330690/cg1<br>0431713/cg11346248<br>/cg18587557/cg1956<br>6405/cg20354552/cg<br>21697381 | 0.436417532                                                                                                                           | 0.531965852 | 0.596674342 | 0.160256809 | 7.07E-06     | 2.69E-05 |             |
| TSS1500 | SLFN13    | 17 | 33777219/3377655<br>4/33776683/337761 5<br>16/33776345                                                        | cg00364956/cg01565<br>438/cg02380585/cg1<br>7653886/cg18067859                                                         | 0.552219067                                                                                                                           | 0.64444791  | 0.704980193 | 0.152761126 | 5.90E-10     | 9.04E-09 |             |
| TSS1500 | SLITRK1   | 13 | 84457340                                                                                                      | 1                                                                                                                      | cg08697689                                                                                                                            | 0.629818235 | 0.690742539 | 0.783754355 | 0.15393612   | 5.61E-11 | 1.65E-09    |
| TSS1500 | SLITRK5   | 13 | 88324193/8832459<br>7/88324432/883245<br>70/88323396/88323<br>992/88323940/8832<br>4169/88323607/883<br>23452 | 10                                                                                                                     | cg08492619/cg09083<br>627/cg15461335/cg1<br>5778745/cg16328172<br>/cg19391029/cg2119<br>4448/cg25081106/cg<br>26110710/cg2715181<br>2 | 0.199629367 | 0.201339328 | 0.355461468 | 0.155832101  | 1.08E-05 | 3.96E-05    |
| TSS1500 | SMOX      | 20 | 4128004/4128750/4<br>128752/4129121                                                                           | 4                                                                                                                      | cg02494904/cg02813<br>644/cg03408497/cg2<br>1038957                                                                                   | 0.439515799 | 0.348324875 | 0.280320116 | -0.159195683 | 9.73E-12 | 5.21E-10    |
| TSS1500 | SNAP25    | 20 | 10198044/1019873<br>2/10198391/101986 5<br>59/10199210                                                        | 5                                                                                                                      | cg11355215/cg14851<br>482/cg19239848/cg2<br>2537474/cg25307902                                                                        | 0.259553636 | 0.353771505 | 0.496165355 | 0.236611719  | 7.08E-08 | 4.70E-07    |
| TSS1500 | SNAP91    | 6  | 84419352/8441932<br>9/84419360                                                                                | 3                                                                                                                      | cg03815358/cg05384<br>102/cg24638849                                                                                                  | 0.314998225 | 0.370889691 | 0.513772638 | 0.198774413  | 3.23E-05 | 0.000106121 |
| TSS1500 | SNORA42   | 1  | 155891244/155890<br>816                                                                                       | 2                                                                                                                      | cg01769968/cg06894<br>549                                                                                                             | 0.83111467  | 0.721922933 | 0.643285927 | -0.187828743 | 1.03E-08 | 9.06E-08    |
| TSS1500 | SNORA5B   | 7  | 45145961/4514680<br>7/45147131                                                                                | 3                                                                                                                      | cg02468649/cg07992<br>143/cg26720010                                                                                                  | 0.68895493  | 0.599089781 | 0.52229922  | -0.16665571  | 4.58E-09 | 4.69E-08    |
| TSS1500 | SNORA80   | 21 | 33750733/3374998<br>6                                                                                         | 2                                                                                                                      | cg09199848/cg09516<br>696                                                                                                             | 0.790117165 | 0.638312894 | 0.608907745 | -0.18120942  | 3.84E-07 | 2.07E-06    |
| TSS1500 | SNORD109A | 15 | 25285748/2552217<br>1/25285663                                                                                | 3                                                                                                                      | cg09358388/cg18499<br>731/cg23225193                                                                                                  | 0.716071598 | 0.65879935  | 0.540442882 | -0.175628716 | 1.90E-08 | 1.52E-07    |
| TSS1500 | SNORD109B | 15 | 25285748/2552217<br>1/25285663                                                                                | 3                                                                                                                      | cg09358388/cg18499<br>731/cg23225193                                                                                                  | 0.716071598 | 0.65879935  | 0.540442882 | -0.175628716 | 1.90E-08 | 1.52E-07    |

|         |             |    |                                                                                  |   |                                                                                                    |             |             |             |              |             |             |
|---------|-------------|----|----------------------------------------------------------------------------------|---|----------------------------------------------------------------------------------------------------|-------------|-------------|-------------|--------------|-------------|-------------|
| TSS1500 | SNORD113-2  | 14 | 101393226/101393397                                                              | 2 | cg02675047/cg04997124                                                                              | 0.69371903  | 0.56477565  | 0.422582695 | -0.271136335 | 5.22E-09    | 5.22E-08    |
| TSS1500 | SNORD113-4  | 14 | 101402192/101402494                                                              | 2 | cg03629141/cg05218696                                                                              | 0.690925805 | 0.640672289 | 0.459901064 | -0.231024741 | 2.74E-06    | 1.16E-05    |
| TSS1500 | SNORD113-9  | 14 | 101410882/101411642                                                              | 2 | cg02990507/cg21053224                                                                              | 0.793084445 | 0.759374817 | 0.630533627 | -0.162550818 | 0.000153993 | 0.000434996 |
| TSS1500 | SNORD114-10 | 14 | 101432887/101432414/101432120                                                    | 3 | cg07472806/cg16689211/cg26435481                                                                   | 0.735467073 | 0.638246278 | 0.534806884 | -0.200660188 | 1.34E-08    | 1.13E-07    |
| TSS1500 | SNORD114-12 | 14 | 101434601                                                                        | 1 | cg03401464                                                                                         | 0.404682125 | 0.265217628 | 0.178182428 | -0.226499697 | 9.74E-14    | 4.59E-11    |
| TSS1500 | SNORD114-16 | 14 | 101438461/101439569/101438663/101438491                                          | 4 | cg08023458/cg12725520/cg14144771/cg26277720                                                        | 0.798786395 | 0.722975064 | 0.640851034 | -0.157935361 | 4.17E-07    | 2.22E-06    |
| TSS1500 | SNORD114-17 | 14 | 101440409                                                                        | 1 | cg23811289                                                                                         | 0.48256067  | 0.3469528   | 0.233578145 | -0.248982525 | 5.51E-15    | 1.31E-11    |
| TSS1500 | SNORD114-20 | 14 | 101445987/101447095                                                              | 2 | cg04966586/cg10000148                                                                              | 0.651522265 | 0.560284575 | 0.475949361 | -0.175572904 | 6.98E-11    | 1.88E-09    |
| TSS1500 | SNORD114-21 | 14 | 101447389/101447985/101447095/101448093                                          | 4 | cg02351406/cg09848749/cg10000148/cg14219236                                                        | 0.592687767 | 0.444999248 | 0.346827865 | -0.245859902 | 1.96E-14    | 2.04E-11    |
| TSS1500 | SNORD114-22 | 14 | 101448585/101447985/101448093                                                    | 3 | cg00554539/cg09848749/cg14219236                                                                   | 0.728325218 | 0.629576253 | 0.557602525 | -0.170722693 | 1.82E-09    | 2.21E-08    |
| TSS1500 | SNORD114-23 | 14 | 101449839/101449311                                                              | 2 | cg01013868/cg07947615                                                                              | 0.614066498 | 0.492349583 | 0.411275643 | -0.202790854 | 5.06E-13    | 9.33E-11    |
| TSS1500 | SNORD114-24 | 14 | 101449839/101450261/101450218/101450066                                          | 4 | cg01013868/cg06963672/cg20326359/cg24947073                                                        | 0.746300454 | 0.663042039 | 0.593891252 | -0.152409201 | 4.62E-12    | 3.51E-10    |
| TSS1500 | SNORD114-9  | 14 | 101432120                                                                        | 1 | cg26435481                                                                                         | 0.732402195 | 0.610818572 | 0.536843668 | -0.195558527 | 1.76E-09    | 2.14E-08    |
| TSS1500 | SNORD115-25 | 15 | 25459305/25459423                                                                | 2 | cg05055833/cg26800551                                                                              | 0.73794274  | 0.649745578 | 0.549649118 | -0.188293622 | 5.91E-06    | 2.30E-05    |
| TSS1500 | SNORD115-30 | 15 | 25469014/25469866/25469586                                                       | 3 | cg12227411/cg12310189/cg13615402                                                                   | 0.649238397 | 0.564579043 | 0.496141679 | -0.153096718 | 6.89E-09    | 6.47E-08    |
| TSS1500 | SNORD115-34 | 15 | 25476386/25476056                                                                | 2 | cg14154381/cg18972584                                                                              | 0.64555767  | 0.5585294   | 0.4241033   | -0.22145437  | 1.29E-10    | 2.92E-09    |
| TSS1500 | SNORD115-40 | 15 | 25488114/25487893/25487823                                                       | 3 | cg00078513/cg09457527/cg26344776                                                                   | 0.64255571  | 0.560220389 | 0.468575614 | -0.173980096 | 4.57E-10    | 7.44E-09    |
| TSS1500 | SNORD115-6  | 15 | 25425099/25425436/25425326                                                       | 3 | cg03959681/cg12604036/cg27455606                                                                   | 0.611900315 | 0.508426122 | 0.444602636 | -0.167297679 | 1.36E-07    | 8.34E-07    |
| TSS1500 | SNORD116-17 | 15 | 25331391/25330536/25327489/25328405/25327919/25330341/25330370/25330242/25327713 | 9 | cg00476675/cg01871408/cg05172655/cg05736011/cg07897695/cg08051964/cg13075322/cg16978004/cg17198397 | 0.684438451 | 0.624119408 | 0.533239238 | -0.151199213 | 1.89E-07    | 1.12E-06    |



|         |             |    |                                                                                                  |   |                                                                                                                         |             |             |             |              |             |             |
|---------|-------------|----|--------------------------------------------------------------------------------------------------|---|-------------------------------------------------------------------------------------------------------------------------|-------------|-------------|-------------|--------------|-------------|-------------|
| TSS1500 | SNORD116-19 | 15 | 25331391/2533053<br>6/25327489/253284<br>05/25327919/25330<br>341/25330370/2533<br>0242/25327713 | 9 | cg00476675/cg01871<br>408/cg05172655/cg0<br>57360111/cg07897695<br>/cg08051964/cg1307<br>5322/cg16978004/cg<br>17198397 | 0.684438451 | 0.624119408 | 0.533239238 | -0.151199213 | 1.89E-07    | 1.12E-06    |
| TSS1500 | SNORD116-24 | 15 | 25338790/2533821<br>9                                                                            | 2 | cg09455126/cg15590<br>133                                                                                               | 0.62163681  | 0.544631489 | 0.459451116 | -0.162185694 | 1.13E-06    | 5.29E-06    |
| TSS1500 | SNORD116-25 | 15 | 25341985/2534211<br>8                                                                            | 2 | cg10153019/cg17720<br>150                                                                                               | 0.780028055 | 0.734443411 | 0.596121691 | -0.183906364 | 1.71E-05    | 6.00E-05    |
| TSS1500 | SNORD116-28 | 15 | 25349082                                                                                         | 1 | cg00465883                                                                                                              | 0.832748675 | 0.78076155  | 0.646365073 | -0.186383602 | 4.13E-05    | 0.000132663 |
| TSS1500 | SNORD116-29 | 15 | 25350925                                                                                         | 1 | cg09275980                                                                                                              | 0.739011805 | 0.668713922 | 0.541917427 | -0.197094378 | 4.96E-05    | 0.000156263 |
| TSS1500 | SNORD19     | 3  | 52721831/5272244<br>5/52722452                                                                   | 3 | cg00150837/cg13917<br>433/cg22692725                                                                                    | 0.60200432  | 0.4625509   | 0.365865543 | -0.236138777 | 3.68E-10    | 6.37E-09    |
| TSS1500 | SNORD32B    | 6  | 29548535/2954869<br>1/29549180/295493<br>52/29549724/29549<br>147/29549759                       | 7 | cg01465527/cg06308<br>109/cg08196667/cg1<br>0139151/cg12322235<br>/cg13311832/cg2083<br>8323                            | 0.638616929 | 0.561200806 | 0.459959703 | -0.178657226 | 4.78E-09    | 4.88E-08    |
| TSS1500 | SNORD87     | 8  | 67835853/6783535<br>1                                                                            | 2 | cg00640314/cg20217<br>649                                                                                               | 0.65718307  | 0.501438994 | 0.424463568 | -0.232719502 | 1.98E-06    | 8.72E-06    |
| TSS1500 | SNRPC       | 6  | 34723390/3472349<br>9                                                                            | 2 | cg04690793/cg15265<br>092                                                                                               | 0.586039375 | 0.495273744 | 0.393376809 | -0.192662566 | 1.48E-08    | 1.23E-07    |
| TSS1500 | SNRPE       | 1  | 203829775/203830<br>200/203829890/203<br>829481                                                  | 4 | cg06642677/cg11405<br>475/cg15481791/cg2<br>3035341                                                                     | 0.502464901 | 0.406815731 | 0.32702841  | -0.175436491 | 3.02E-10    | 5.48E-09    |
| TSS1500 | SNTG1       | 8  | 50824244/5082354<br>1/50823173/508234<br>68/50823377/50823<br>252/50823124/5082<br>4358          | 8 | cg06248179/cg07739<br>205/cg07854547/cg0<br>8896053/cg08954417<br>/cg22095914/cg2508<br>6136/cg26461695                 | 0.249223634 | 0.339200155 | 0.493951034 | 0.2447274    | 1.71E-08    | 1.39E-07    |
| TSS1500 | SNTG2       | 2  | 945298/946010/945<br>423/946127/945697                                                           | 5 | cg06431025/cg14256<br>587/cg16137949/cg2<br>0225749/cg20390515                                                          | 0.173346682 | 0.178217636 | 0.324336245 | 0.150989563  | 0.003327538 | 0.007162417 |
| TSS1500 | SNX32       | 11 | 65600846/6560073<br>9/65600888/656007<br>73/65601167/65601<br>202                                | 6 | cg05758094/cg06678<br>084/cg13467162/cg2<br>1971621/cg22959820<br>/cg25616216                                           | 0.266128677 | 0.351482356 | 0.483737663 | 0.217608986  | 1.90E-06    | 8.38E-06    |

|         |         |    |                                                                                                             |    |                                                                                                                                                  |             |             |             |              |             |             |
|---------|---------|----|-------------------------------------------------------------------------------------------------------------|----|--------------------------------------------------------------------------------------------------------------------------------------------------|-------------|-------------|-------------|--------------|-------------|-------------|
| TSS1500 | SORCS3  | 10 | 106400259/106400<br>114/106399513/106<br>400565/106399957/<br>106400454/106399<br>877                       | 7  | cg02320740/cg02392<br>179/cg07126167/cg0<br>8768569/cg09551147<br>/cg14752336/cg2379<br>7411                                                     | 0.259994593 | 0.362678822 | 0.524607345 | 0.264612752  | 1.80E-09    | 2.18E-08    |
| TSS1500 | SOX11   | 2  | 5831722/5831394/5<br>832430                                                                                 | 3  | cg08432727/cg08526<br>991/cg12312988                                                                                                             | 0.39844467  | 0.480870659 | 0.601111159 | 0.202666489  | 1.12E-09    | 1.50E-08    |
| TSS1500 | SOX17   | 8  | 55370283/5537019<br>2                                                                                       | 2  | cg03329976/cg09626<br>193                                                                                                                        | 0.350871955 | 0.395748067 | 0.506181368 | 0.155309413  | 0.000250366 | 0.000676895 |
| TSS1500 | SOX7    | 8  | 10588486/1058935<br>9/10588386/105890<br>93                                                                 | 4  | cg11603463/cg16799<br>111/cg22008625/cg2<br>4690731                                                                                              | 0.194024899 | 0.257929076 | 0.388488334 | 0.194463435  | 9.86E-05    | 0.000292043 |
| TSS1500 | SOX8    | 16 | 1031458/1031205/1<br>030388/1030383/10<br>30561/1030619/103<br>0444/1030586/1030<br>568/1030401/10314<br>28 | 11 | cg02049499/cg02925<br>162/cg04493430/cg0<br>4809453/cg05031521<br>/cg05520409/cg0677<br>7194/cg08965276/cg<br>09854626/cg2169639<br>3/cg22904679 | 0.242730752 | 0.288053858 | 0.435825115 | 0.193094363  | 2.76E-07    | 1.55E-06    |
| TSS1500 | SPAG11B | 8  | 7311130                                                                                                     | 1  | cg14600420                                                                                                                                       | 0.61582796  | 0.442693267 | 0.288175909 | -0.327652051 | 9.33E-12    | 5.15E-10    |
| TSS1500 | SPARCL1 | 4  | 88451223/8845149<br>6/88451346                                                                              | 3  | cg05350879/cg08003<br>102/cg14334389                                                                                                             | 0.466098305 | 0.380375717 | 0.254148514 | -0.211949791 | 9.02E-09    | 8.12E-08    |
| TSS1500 | SPDYE4  | 17 | 8662302/8663295/8<br>662770                                                                                 | 3  | cg08036512/cg25304<br>136/cg26665785                                                                                                             | 0.69900518  | 0.584019178 | 0.451488177 | -0.247517003 | 2.04E-09    | 2.42E-08    |
| TSS1500 | SPEF1   | 20 | 3762520/3762422/3<br>762653                                                                                 | 3  | cg02347859/cg08708<br>079/cg17185202                                                                                                             | 0.72432255  | 0.619286833 | 0.555667832 | -0.168654718 | 2.63E-07    | 1.49E-06    |
| TSS1500 | SPEG    | 2  | 220299116/220298<br>547/220299484                                                                           | 3  | cg14074251/cg22126<br>505/cg25925023                                                                                                             | 0.66372998  | 0.599546931 | 0.498857559 | -0.164872421 | 6.45E-09    | 6.17E-08    |
| TSS1500 | SPINK4  | 9  | 33239641                                                                                                    | 1  | cg00079056                                                                                                                                       | 0.847814665 | 0.771030078 | 0.683332064 | -0.164482601 | 2.18E-05    | 7.45E-05    |
| TSS1500 | SPOCK2  | 10 | 73849626/7384912<br>4/73849106/738491<br>67                                                                 | 4  | cg01861509/cg02909<br>446/cg12752647/cg1<br>3665981                                                                                              | 0.496127355 | 0.368386306 | 0.294616839 | -0.201510516 | 7.82E-11    | 2.03E-09    |
| TSS1500 | SPP1    | 4  | 88895691/8889620<br>8                                                                                       | 2  | cg00583003/cg02549<br>628                                                                                                                        | 0.60551281  | 0.4814535   | 0.373312357 | -0.232200453 | 1.27E-10    | 2.90E-09    |
| TSS1500 | SPRR1A  | 1  | 152955080/152956<br>186/152955543                                                                           | 3  | cg00922841/cg04505<br>023/cg06101324                                                                                                             | 0.64891722  | 0.590983239 | 0.492823048 | -0.156094172 | 8.48E-09    | 7.71E-08    |
| TSS1500 | SPRR2C  | 1  | 153114690/153114<br>766/153115333                                                                           | 3  | cg07804289/cg10119<br>001/cg23606417                                                                                                             | 0.60033274  | 0.528740198 | 0.444398412 | -0.155934328 | 4.07E-08    | 2.91E-07    |
| TSS1500 | SPRR2G  | 1  | 153124825                                                                                                   | 1  | cg20141817                                                                                                                                       | 0.770604855 | 0.654291583 | 0.556063064 | -0.214541791 | 4.31E-07    | 2.29E-06    |

|         |            |    |                                                                             |   |                                                                                                         |             |             |             |              |          |          |
|---------|------------|----|-----------------------------------------------------------------------------|---|---------------------------------------------------------------------------------------------------------|-------------|-------------|-------------|--------------|----------|----------|
| TSS1500 | SPRYD5     | 11 | 55649706/5565004<br>6                                                       | 2 | cg07200877/cg18268<br>863                                                                               | 0.74857808  | 0.692483661 | 0.5673093   | -0.18126878  | 4.03E-09 | 4.23E-08 |
| TSS1500 | SPTA1      | 1  | 158656718                                                                   | 1 | cg22730004                                                                                              | 0.37384369  | 0.224023283 | 0.148832282 | -0.225011408 | 1.86E-11 | 7.80E-10 |
| TSS1500 | SPTBN5     | 15 | 42187649/4218683<br>0/42187036/421869<br>45/42187179                        | 5 | cg00165394/cg13586<br>457/cg18188010/cg1<br>9691260/cg24203709                                          | 0.460790181 | 0.369827779 | 0.30171024  | -0.159079941 | 1.30E-10 | 2.94E-09 |
| TSS1500 | SRPK1      | 6  | 35890197/3588917<br>7/35889893                                              | 3 | cg08603125/cg13866<br>752/cg18198550                                                                    | 0.429342355 | 0.343766878 | 0.276669678 | -0.152672677 | 1.63E-10 | 3.45E-09 |
| TSS1500 | SSC5D      | 19 | 55998490/5599873<br>2/55998931                                              | 3 | cg03645984/cg17379<br>828/cg19820609                                                                    | 0.509887665 | 0.4367637   | 0.359526945 | -0.15036072  | 1.45E-09 | 1.84E-08 |
| TSS1500 | SSPO       | 7  | 149472049/149471<br>884/149472134                                           | 3 | cg01776278/cg16902<br>863/cg19351398                                                                    | 0.593245355 | 0.517769731 | 0.425362711 | -0.167882644 | 3.93E-10 | 6.66E-09 |
| TSS1500 | ST6GALNAC1 | 17 | 74641275/7464129<br>4/74641167                                              | 3 | cg00898480/cg03096<br>803/cg13049471                                                                    | 0.627073715 | 0.4775208   | 0.373668823 | -0.253404892 | 2.18E-11 | 8.71E-10 |
| TSS1500 | ST6GALNAC5 | 1  | 77331940                                                                    | 1 | cg20417424                                                                                              | 0.641121125 | 0.541041667 | 0.391830709 | -0.249290416 | 2.94E-09 | 3.28E-08 |
| TSS1500 | ST8SIA4    | 5  | 100239919/100240<br>048/100239319/100<br>240059/100240223/<br>100239529     | 6 | cg00405699/cg02318<br>139/cg19088984/cg2<br>2965432/cg26872028<br>/cg27367469                           | 0.268651367 | 0.330234897 | 0.46248451  | 0.193833144  | 4.04E-07 | 2.16E-06 |
| TSS1500 | ST8SIA5    | 18 | 44338099/4433791<br>0/44337664/443379<br>22/44338147/44337<br>853           | 6 | cg01059449/cg15049<br>968/cg15966229/cg2<br>3129478/cg23302884<br>/cg26155939                           | 0.285734185 | 0.334694973 | 0.535361973 | 0.249627787  | 1.02E-06 | 4.88E-06 |
| TSS1500 | STAB2      | 12 | 103979670/103980<br>767/103980801/103<br>980017                             | 4 | cg00550529/cg11010<br>909/cg23131355/cg2<br>3227824                                                     | 0.725736221 | 0.655772115 | 0.561423039 | -0.164313183 | 6.64E-07 | 3.34E-06 |
| TSS1500 | STK31      | 7  | 23749740/2374966<br>7/23749722/237495<br>33/23749607/23749<br>639           | 6 | cg05000488/cg05407<br>490/cg13514718/cg1<br>3802883/cg14898779<br>/cg25612145                           | 0.808057841 | 0.715949206 | 0.578179044 | -0.229878797 | 7.31E-09 | 6.80E-08 |
| TSS1500 | STK32B     | 4  | 5052464/5052379/5<br>052393/5053085/50<br>52795/5053152/505<br>2618/5052526 | 8 | cg00225765/cg08961<br>294/cg10182321/cg1<br>1682071/cg11768886<br>/cg19764048/cg2255<br>1741/cg25688113 | 0.153532076 | 0.21550239  | 0.323113689 | 0.169581612  | 1.28E-05 | 4.60E-05 |
| TSS1500 | STK38      | 6  | 36515676/3651585<br>6                                                       | 2 | cg02964385/cg23670<br>203                                                                               | 0.598610195 | 0.443515925 | 0.373382268 | -0.225227927 | 1.99E-14 | 2.04E-11 |
| TSS1500 | SUB1       | 5  | 32585396/3258522<br>1/32584912                                              | 3 | cg04225902/cg12600<br>337/cg18721397                                                                    | 0.754064323 | 0.669797307 | 0.528998767 | -0.225065557 | 6.40E-06 | 2.47E-05 |

|         |         |    |                                                                                                              |    |                                                                                                                          |             |             |             |              |             |             |
|---------|---------|----|--------------------------------------------------------------------------------------------------------------|----|--------------------------------------------------------------------------------------------------------------------------|-------------|-------------|-------------|--------------|-------------|-------------|
| TSS1500 | SULT2A1 | 19 | 48390114                                                                                                     | 1  | cg26574395                                                                                                               | 0.741835755 | 0.669565939 | 0.531003336 | -0.210832419 | 0.000122619 | 0.000354608 |
| TSS1500 | SVOP    | 12 | 109460299/109459622                                                                                          | 2  | cg00461311/cg25374714                                                                                                    | 0.61544229  | 0.488755606 | 0.389417661 | -0.226024629 | 1.69E-10    | 3.55E-09    |
| TSS1500 | SYN2    | 3  | 12045449/12045459/12045461                                                                                   | 3  | cg02700894/cg15873301/cg22839075                                                                                         | 0.304309728 | 0.327207939 | 0.49542752  | 0.191117792  | 0.002016991 | 0.004529041 |
| TSS1500 | SYNPO2  | 4  | 119808935/119808885                                                                                          | 2  | cg10320997/cg26325949                                                                                                    | 0.59746355  | 0.527540356 | 0.415245266 | -0.182218284 | 2.36E-08    | 1.83E-07    |
| TSS1500 | SYT14   | 1  | 210111057/210110998/210111028/210111011/210111162                                                            | 5  | cg02795029/cg07581146/cg15389528/cg25371503/cg26158959                                                                   | 0.254276755 | 0.356179969 | 0.427411854 | 0.173135099  | 6.98E-06    | 2.66E-05    |
| TSS1500 | SYT6    | 1  | 114697582/11469698/114697523/114696822/114697352/114697113/114696946/114697095/114697032/114696798/114697707 | 11 | cg00764109/cg03514545/cg06620092/cg08883066/cg12097117/cg12804010/cg15976388/cg19874857/cg19901801/cg22646710/cg26426632 | 0.241304647 | 0.277428165 | 0.427951805 | 0.186647158  | 2.43E-05    | 8.22E-05    |
| TSS1500 | SYT9    | 11 | 7272804/7272653/7272867/7272876                                                                              | 4  | cg01806928/cg08913010/cg14243481/cg26945996                                                                              | 0.281621628 | 0.351672528 | 0.545256369 | 0.263634741  | 5.83E-06    | 2.27E-05    |
| TSS1500 | T-SP1   | 8  | 10382165/10381792                                                                                            | 2  | cg01072821/cg21997510                                                                                                    | 0.53560619  | 0.424380069 | 0.341125661 | -0.194480529 | 1.87E-10    | 3.84E-09    |
| TSS1500 | TAAR9   | 6  | 132858438/132858546/132858597                                                                                | 3  | cg07882863/cg14047911/cg15698945                                                                                         | 0.775874275 | 0.636632196 | 0.499383806 | -0.276490469 | 2.60E-10    | 4.91E-09    |
| TSS1500 | TACR3   | 4  | 104641319/104641548/104641250                                                                                | 3  | cg05389335/cg07824172/cg17160751                                                                                         | 0.360435123 | 0.430035367 | 0.540108238 | 0.179673115  | 8.45E-07    | 4.13E-06    |
| TSS1500 | TAF4B   | 18 | 23805713/23806189                                                                                            | 2  | cg02833108/cg23398091                                                                                                    | 0.81811406  | 0.69689905  | 0.573304609 | -0.244809451 | 6.28E-09    | 6.02E-08    |
| TSS1500 | TAS2R1  | 5  | 9631216/9631117                                                                                              | 2  | cg09532664/cg23248452                                                                                                    | 0.6423812   | 0.597948228 | 0.4551479   | -0.1872333   | 6.84E-06    | 2.62E-05    |
| TSS1500 | TAS2R16 | 7  | 122636106/122636635                                                                                          | 2  | cg19660744/cg23719342                                                                                                    | 0.649059773 | 0.548548883 | 0.426384368 | -0.222675404 | 1.73E-10    | 3.61E-09    |
| TSS1500 | TAS2R39 | 7  | 142879929/14287966                                                                                           | 2  | cg06489609/cg20896431                                                                                                    | 0.725847275 | 0.631062525 | 0.535081236 | -0.190766039 | 2.15E-06    | 9.38E-06    |
| TSS1500 | TAT     | 16 | 71611519/71612168                                                                                            | 2  | cg10251217/cg27189824                                                                                                    | 0.595823588 | 0.506140222 | 0.41498112  | -0.180842467 | 1.76E-12    | 2.01E-10    |
| TSS1500 | TBX15   | 1  | 119532850/119532773/119532655/119532542/119532736/119532925                                                  | 6  | cg00466334/cg02362103/cg03942051/cg08942939/cg22820316/cg23371746                                                        | 0.396286828 | 0.521989196 | 0.651061339 | 0.254774511  | 2.25E-11    | 8.82E-10    |

|         |          |    |                                                                                                                                                                                                     |    |                                                                                                                                                                                                                     |             |             |             |              |          |             |
|---------|----------|----|-----------------------------------------------------------------------------------------------------------------------------------------------------------------------------------------------------|----|---------------------------------------------------------------------------------------------------------------------------------------------------------------------------------------------------------------------|-------------|-------------|-------------|--------------|----------|-------------|
| TSS1500 | TBX18    | 6  | 85474585/8547459<br>5/85474424/854742<br>09/85474313/85474<br>188                                                                                                                                   | 6  | cg01114937/cg05674<br>784/cg09259037/cg0<br>9749813/cg09817427<br>/cg16210497                                                                                                                                       | 0.2202741   | 0.297825676 | 0.419324686 | 0.199050586  | 4.22E-06 | 1.70E-05    |
| TSS1500 | TBX20    | 7  | 35294640/3529519<br>8/35294949/352944<br>30/35295120/35294<br>658                                                                                                                                   | 6  | cg02524946/cg09349<br>530/cg11117878/cg1<br>2467749/cg18011916<br>/cg25377206                                                                                                                                       | 0.377328403 | 0.461968742 | 0.610150885 | 0.232822483  | 5.40E-09 | 5.35E-08    |
| TSS1500 | TBX5     | 12 | 114842700/114846<br>968/114847641/114<br>847043/114847508/<br>114847164/114844<br>265/114847578/114<br>843188/114845180/<br>114846503/114846<br>849/114845223/114<br>841980/114847438/<br>114842031 | 16 | cg00756451/cg03843<br>000/cg05555207/cg0<br>5769349/cg05929882<br>/cg06911121/cg0831<br>8726/cg12670347/cg<br>14214262/cg1426479<br>5/cg16559598/cg166<br>05327/cg16805360/c<br>g17462200/cg192904<br>10/cg20099830 | 0.295115396 | 0.352978794 | 0.48168945  | 0.186574054  | 8.42E-07 | 4.12E-06    |
| TSS1500 | TCERG1L  | 10 | 133110349/133110<br>646/133110731/133<br>111331/133110244                                                                                                                                           | 5  | cg03109827/cg03943<br>081/cg18138206/cg2<br>0239333/cg23632875                                                                                                                                                      | 0.327061502 | 0.421557845 | 0.566537581 | 0.239476079  | 2.80E-09 | 3.15E-08    |
| TSS1500 | TCF15    | 20 | 592164/591151/591<br>400/591221                                                                                                                                                                     | 4  | cg00983437/cg02760<br>031/cg06143901/cg1<br>1076994                                                                                                                                                                 | 0.353209088 | 0.413009124 | 0.520730805 | 0.167521716  | 6.66E-07 | 3.35E-06    |
| TSS1500 | TCHHL1   | 1  | 152062567                                                                                                                                                                                           | 1  | cg01925883                                                                                                                                                                                                          | 0.73411146  | 0.6784471   | 0.570087314 | -0.164024146 | 5.61E-05 | 0.000174362 |
| TSS1500 | TCL6     | 14 | 96116261/9611728<br>6/96116699                                                                                                                                                                      | 3  | cg03050975/cg16209<br>310/cg18114811                                                                                                                                                                                | 0.587117548 | 0.498578483 | 0.37726267  | -0.209854877 | 2.95E-09 | 3.29E-08    |
| TSS1500 | TCN1     | 11 | 59634276                                                                                                                                                                                            | 1  | cg03928812                                                                                                                                                                                                          | 0.50406189  | 0.338640556 | 0.238165301 | -0.265896589 | 2.50E-09 | 2.86E-08    |
| TSS1500 | TCP10L   | 21 | 33958437/3395806<br>0/33958055/339584<br>11                                                                                                                                                         | 4  | cg01194119/cg09247<br>736/cg12549554/cg1<br>6417831                                                                                                                                                                 | 0.789257317 | 0.673304213 | 0.5452121   | -0.244045217 | 1.62E-10 | 3.43E-09    |
| TSS1500 | TCP11    | 6  | 35109548/3510943<br>5/35109485/351097<br>22/35109398                                                                                                                                                | 5  | cg09027493/cg12090<br>052/cg12835524/cg1<br>6083558/cg24623244                                                                                                                                                      | 0.611134185 | 0.509901217 | 0.460077355 | -0.15105683  | 3.82E-08 | 2.75E-07    |
| TSS1500 | TCTEX1D1 | 1  | 67217826/6721776<br>9/67217886/672176<br>73/67217853                                                                                                                                                | 5  | cg08857729/cg09769<br>134/cg14207728/cg1<br>7819635/cg24110050                                                                                                                                                      | 0.28786256  | 0.335832583 | 0.470465905 | 0.182603345  | 8.98E-05 | 0.000268088 |

|         |         |    |                                                                                                             |    |                                                                                                                                     |             |             |             |              |          |          |
|---------|---------|----|-------------------------------------------------------------------------------------------------------------|----|-------------------------------------------------------------------------------------------------------------------------------------|-------------|-------------|-------------|--------------|----------|----------|
| TSS1500 | TEKT1   | 17 | 6735316/6735539/6735272                                                                                     | 3  | cg03549162/cg12685753/cg15615160                                                                                                    | 0.201185964 | 0.266171536 | 0.444536309 | 0.243350345  | 2.35E-06 | 1.01E-05 |
| TSS1500 | TEX12   | 11 | 112037427/112037134/112037102                                                                               | 3  | cg03304763/cg07267984/cg13591377                                                                                                    | 0.734878423 | 0.627130404 | 0.568257998 | -0.166620425 | 1.42E-10 | 3.13E-09 |
| TSS1500 | TEX15   | 8  | 30707156/30707701                                                                                           | 2  | cg00831770/cg20939319                                                                                                               | 0.458801065 | 0.340908156 | 0.243172445 | -0.21562862  | 3.61E-13 | 7.96E-11 |
| TSS1500 | TF      | 3  | 133464047/133464651/133464463/133464713                                                                     | 4  | cg02621528/cg10772086/cg16267236/cg18286850                                                                                         | 0.470224748 | 0.387035917 | 0.298962354 | -0.171262394 | 1.97E-10 | 3.98E-09 |
| TSS1500 | TFF1    | 21 | 43787747/43786997                                                                                           | 2  | cg01442565/cg01886855                                                                                                               | 0.567226565 | 0.465155125 | 0.374617761 | -0.192608804 | 1.20E-10 | 2.79E-09 |
| TSS1500 | TFF3    | 21 | 43737065/43736736/43736926/43737014                                                                         | 4  | cg08198280/cg19452276/cg20488657/cg24230696                                                                                         | 0.54827054  | 0.433578464 | 0.341220225 | -0.207050315 | 2.82E-12 | 2.70E-10 |
| TSS1500 | TFPI2   | 7  | 93520346/93520323/93521153/93520445/93520275/93520527/93520269/93521093/93520566/93520452/93520288/93521196 | 12 | cg03333330/cg07380959/cg07603382/cg09558850/cg10539069/cg13328713/cg15649801/cg18302726/cg19103770/cg19854521/cg24084681/cg27496965 | 0.425195168 | 0.499148146 | 0.59194832  | 0.166753152  | 3.40E-08 | 2.50E-07 |
| TSS1500 | TFR2    | 7  | 100239764/100240094/100240341                                                                               | 3  | cg01919768/cg16628205/cg26369382                                                                                                    | 0.481687452 | 0.41517958  | 0.331301329 | -0.150386123 | 5.04E-11 | 1.55E-09 |
| TSS1500 | TH      | 11 | 2193742/2193284/2193293                                                                                     | 3  | cg04204669/cg05141787/cg21644468                                                                                                    | 0.528481238 | 0.4062004   | 0.30862163  | -0.219859608 | 1.85E-13 | 6.62E-11 |
| TSS1500 | THRSP   | 11 | 77773924/77774337                                                                                           | 2  | cg09721595/cg16505204                                                                                                               | 0.62045304  | 0.551424858 | 0.454123527 | -0.166329513 | 5.76E-11 | 1.66E-09 |
| TSS1500 | THSD7B  | 2  | 137747719/137747982                                                                                         | 2  | cg08084967/cg25714147                                                                                                               | 0.763253023 | 0.662500381 | 0.552185261 | -0.211067761 | 3.04E-09 | 3.35E-08 |
| TSS1500 | TIGIT   | 3  | 114011433/114012316                                                                                         | 2  | cg19440299/cg22577252                                                                                                               | 0.677761113 | 0.536701422 | 0.44276013  | -0.235000983 | 9.61E-12 | 5.17E-10 |
| TSS1500 | TINAG   | 6  | 54172997/54172183/54172378                                                                                  | 3  | cg00012148/cg12397274/cg27090087                                                                                                    | 0.433067683 | 0.322588361 | 0.256430597 | -0.176637086 | 3.08E-12 | 2.81E-10 |
| TSS1500 | TINAGL1 | 1  | 32041732/32041052/32041605/32041507                                                                         | 4  | cg03314569/cg09070415/cg10530055/cg16103203                                                                                         | 0.45305019  | 0.35656175  | 0.285581742 | -0.167468448 | 7.45E-11 | 1.96E-09 |
| TSS1500 | TIPIN   | 15 | 66649558/66649861                                                                                           | 2  | cg11164506/cg12541836                                                                                                               | 0.686503283 | 0.551740306 | 0.431130809 | -0.255372473 | 8.59E-13 | 1.33E-10 |
| TSS1500 | TK1     | 17 | 76183602/76183641/76184081/76183551                                                                         | 4  | cg00739217/cg02441982/cg21940220/cg22061523                                                                                         | 0.502505785 | 0.413918914 | 0.32701407  | -0.175491715 | 9.40E-10 | 1.31E-08 |

|         |          |    |                                                                                             |                                                                                                         |              |             |             |              |          |             |
|---------|----------|----|---------------------------------------------------------------------------------------------|---------------------------------------------------------------------------------------------------------|--------------|-------------|-------------|--------------|----------|-------------|
| TSS1500 | TLR6     | 4  | 38859706/3885933<br>9/38859770/388597 4<br>28                                               | cg02221520/cg04840<br>108/cg14578677/cg1<br>4665413                                                     | 0.376540585  | 0.306625811 | 0.225306259 | -0.151234326 | 1.67E-07 | 1.00E-06    |
| TSS1500 | TLX3     | 5  | 170735186/170735<br>264/170736021/170 6<br>734856/170735754/<br>170735347                   | cg05787556/cg18336<br>674/cg18468394/cg2<br>2160448/cg24881420<br>/cg26517171                           | 0.386740033  | 0.468786828 | 0.621915544 | 0.235175511  | 5.73E-09 | 5.60E-08    |
| TSS1500 | TM2D3    | 15 | 102193344/102193<br>228/102192853/102 4<br>193416                                           | cg01537571/cg13202<br>221/cg17115258/cg2<br>5863289                                                     | 0.453025078  | 0.383101185 | 0.273167243 | -0.179857834 | 2.16E-11 | 8.64E-10    |
| TSS1500 | TM4SF19  | 3  | 196065569/196065<br>506/196065485/196 4<br>065688                                           | cg05445326/cg13314<br>965/cg15044270/cg2<br>3250593                                                     | 0.719088245  | 0.569534231 | 0.433443041 | -0.285645204 | 9.77E-12 | 5.21E-10    |
| TSS1500 | TM6SF1   | 15 | 83775850/8377593 3<br>1/83776023                                                            | cg04120171/cg17018<br>527/cg22719913                                                                    | 0.224306397  | 0.294544478 | 0.410487654 | 0.186181257  | 4.57E-06 | 1.83E-05    |
| TSS1500 | TM9SF4   | 20 | 30696827/3069701 3<br>7/30696538                                                            | cg20672708/cg25953<br>453/cg26450387                                                                    | 0.658819115  | 0.5663431   | 0.488864793 | -0.169954322 | 1.51E-11 | 6.86E-10    |
| TSS1500 | TMCO5A   | 15 | 38226316/3822645 2<br>4                                                                     | cg11854043/cg23254<br>045                                                                               | 0.547123465  | 0.464455933 | 0.353271732 | -0.193851733 | 8.47E-07 | 4.14E-06    |
| TSS1500 | TMEM130  | 7  | 98468038/9846816 3<br>7/98468047                                                            | cg02132470/cg06124<br>528/cg19974428                                                                    | 0.128754732  | 0.207886171 | 0.355085309 | 0.226330578  | 2.86E-05 | 9.54E-05    |
| TSS1500 | TMEM132B | 12 | 125810767/125810 2<br>688                                                                   | cg01012836/cg10520<br>543                                                                               | 0.479971125  | 0.360555911 | 0.256327255 | -0.22364387  | 5.65E-12 | 3.94E-10    |
| TSS1500 | TMEM132C | 12 | 128750971/128751 5<br>460/128751582/128 5<br>751042/128751048                               | cg00698908/cg03530<br>754/cg06164660/cg1<br>0406124/cg18628094                                          | 0.398911408  | 0.448370586 | 0.572123577 | 0.17321217   | 5.71E-05 | 0.000177281 |
| TSS1500 | TMEM132E | 17 | 32907132/3290662<br>2/32906456/329073 8<br>88/32907002/32906 8<br>454/32906394/3290<br>6991 | cg00196787/cg04790<br>084/cg04906989/cg0<br>6459443/cg06557358<br>/cg08967802/cg0962<br>8838/cg23791505 | 0.15414405   | 0.183092805 | 0.328770194 | 0.174626143  | 5.82E-05 | 0.000180153 |
| TSS1500 | TMEM139  | 7  | 142981776/142981 3<br>689/142981779                                                         | cg15652212/cg21852<br>589/cg22531018                                                                    | 0.641732465  | 0.502494211 | 0.370342645 | -0.27138982  | 1.41E-11 | 6.59E-10    |
| TSS1500 | TMEM14E  | 3  | 152059421 1                                                                                 | cg15012282                                                                                              | 0.622756345  | 0.477845667 | 0.380257859 | -0.242498486 | 2.16E-12 | 2.21E-10    |
| TSS1500 | TMEM156  | 4  | 39034637/3903428 2<br>4                                                                     | cg02131853/cg25246<br>082                                                                               | 0.4011111045 | 0.3130807   | 0.242156216 | -0.158954829 | 1.67E-09 | 2.06E-08    |
| TSS1500 | TMEM163  | 2  | 135476907/135476 6<br>909/135477056/135 6<br>476880/135477425/<br>135476893                 | cg08343042/cg10025<br>300/cg15297650/cg1<br>7319374/cg22242207<br>/cg25476312                           | 0.296316872  | 0.333074003 | 0.481755746 | 0.185438874  | 4.76E-05 | 0.000150823 |

|         |           |    |                                                                                                               |    |                                                                                                                                       |             |             |             |              |          |          |
|---------|-----------|----|---------------------------------------------------------------------------------------------------------------|----|---------------------------------------------------------------------------------------------------------------------------------------|-------------|-------------|-------------|--------------|----------|----------|
| TSS1500 | TMEM177   | 2  | 120435949/120436<br>534/120436430/120<br>436039                                                               | 4  | cg12108912/cg20302<br>082/cg23456409/cg2<br>4441810                                                                                   | 0.414599078 | 0.31309656  | 0.251530321 | -0.163068758 | 1.28E-10 | 2.91E-09 |
| TSS1500 | TMEM196   | 7  | 19813299/1981329<br>7/19813525/198131<br>49/19812850/19813<br>079/19812760/1981<br>3244/19813493/198<br>13001 | 10 | cg04111071/cg06896<br>909/cg10182869/cg1<br>0184740/cg11124364<br>/cg15377585/cg1903<br>7304/cg19803052/cg<br>21760040/cg2518448<br>1 | 0.332884224 | 0.398183188 | 0.493455612 | 0.160571388  | 9.97E-07 | 4.77E-06 |
| TSS1500 | TMEM200A  | 6  | 130757762                                                                                                     | 1  | cg26931050                                                                                                                            | 0.74042799  | 0.583572439 | 0.493609582 | -0.246818408 | 2.27E-08 | 1.77E-07 |
| TSS1500 | TMPRSS11F | 4  | 68995995                                                                                                      | 1  | cg02936740                                                                                                                            | 0.771209585 | 0.68159355  | 0.568941105 | -0.20226848  | 2.13E-05 | 7.29E-05 |
| TSS1500 | TMPRSS6   | 22 | 37500588/3750069<br>4/37500722                                                                                | 3  | cg00556408/cg25786<br>785/cg26679348                                                                                                  | 0.71978451  | 0.5996113   | 0.50827153  | -0.21151298  | 1.03E-08 | 9.08E-08 |
| TSS1500 | TMX3      | 18 | 66383305/6638321<br>3/66382559                                                                                | 3  | cg05188150/cg12487<br>792/cg12522039                                                                                                  | 0.63030602  | 0.532984164 | 0.43167377  | -0.19863225  | 4.17E-09 | 4.35E-08 |
| TSS1500 | TNFRSF10A | 8  | 23082961/2308357<br>8/23082951/230835<br>51/23083353                                                          | 5  | cg22843797/cg23303<br>108/cg23882019/cg2<br>4278165/cg26530341                                                                        | 0.419538741 | 0.31454578  | 0.249660829 | -0.169877911 | 4.95E-10 | 7.92E-09 |
| TSS1500 | TNFSF13   | 17 | 7461272/7461260/7<br>460690/7460485                                                                           | 4  | cg00816039/cg05872<br>923/cg13829089/cg1<br>7267493                                                                                   | 0.457469138 | 0.374500224 | 0.296581927 | -0.160887211 | 3.09E-10 | 5.60E-09 |
| TSS1500 | TNN       | 1  | 175035502/175036<br>687/175036403                                                                             | 3  | cg02138218/cg05643<br>339/cg11741115                                                                                                  | 0.6357775   | 0.532945261 | 0.470377027 | -0.165400473 | 3.57E-07 | 1.95E-06 |
| TSS1500 | TNNI1     | 1  | 201391627/201391<br>747/201392102                                                                             | 3  | cg07236127/cg13172<br>153/cg22449085                                                                                                  | 0.58347014  | 0.504390994 | 0.424812243 | -0.158657897 | 3.40E-07 | 1.86E-06 |
| TSS1500 | TNNT1     | 19 | 55661330/5566187<br>2                                                                                         | 2  | cg00844197/cg19393<br>762                                                                                                             | 0.613030585 | 0.532714206 | 0.455586245 | -0.157444434 | 1.70E-06 | 7.60E-06 |
| TSS1500 | TNNT2     | 1  | 201347917/201348<br>231/201347483/201<br>347479/201347550                                                     | 5  | cg07596645/cg09274<br>810/cg18692273/cg2<br>3594208/cg24249973                                                                        | 0.587884016 | 0.474955813 | 0.390601241 | -0.197282775 | 2.29E-13 | 7.11E-11 |
| TSS1500 | TOMM20L   | 14 | 58862246/5886241<br>7/58862146                                                                                | 3  | cg04749433/cg04752<br>257/cg18549946                                                                                                  | 0.478697182 | 0.38250328  | 0.300235805 | -0.178461377 | 1.88E-11 | 7.87E-10 |
| TSS1500 | TP53RK    | 20 | 45319455/4531889<br>0/45319350                                                                                | 3  | cg07291836/cg07987<br>148/cg15305633                                                                                                  | 0.584501578 | 0.510682097 | 0.408316168 | -0.176185409 | 6.25E-10 | 9.48E-09 |



|         |         |    |                                                                            |                                                                                              |             |             |             |              |          |             |
|---------|---------|----|----------------------------------------------------------------------------|----------------------------------------------------------------------------------------------|-------------|-------------|-------------|--------------|----------|-------------|
| TSS1500 | TP63    | 3  | 189506187/189348<br>936/189349003/189 5<br>506825/189347820                | cg02122981/cg05129<br>081/cg12188416/cg1<br>3518031/cg16764781                               | 0.46543456  | 0.385155256 | 0.292724629 | -0.172709932 | 5.79E-07 | 2.96E-06    |
| TSS1500 | TPRG1   | 3  | 188888497/188888<br>486/188888584                                          | cg14768087/cg19682<br>367/cg23259542                                                         | 0.471147038 | 0.377139217 | 0.305462548 | -0.16568449  | 1.75E-10 | 3.65E-09    |
| TSS1500 | TPSD1   | 16 | 1305420/1305718/1<br>305579                                                | cg01375871/cg03466<br>598/cg09956782                                                         | 0.660017477 | 0.590258054 | 0.468394686 | -0.19162279  | 2.59E-09 | 2.95E-08    |
| TSS1500 | TPSG1   | 16 | 1276278/1275895/1<br>275475/1275785                                        | cg02194908/cg03497<br>872/cg05026881/cg1<br>3997068                                          | 0.55756113  | 0.465591611 | 0.372483227 | -0.185077903 | 2.04E-10 | 4.10E-09    |
| TSS1500 | TRABD   | 22 | 50623687/5062316<br>5/50623692/506240 4<br>30                              | cg05297854/cg06372<br>718/cg11213574/cg1<br>8205517                                          | 0.386087803 | 0.495962518 | 0.569740425 | 0.183652623  | 6.01E-08 | 4.08E-07    |
| TSS1500 | TRAM1L1 | 4  | 118007225/118007<br>206/118007342                                          | cg03345976/cg22155<br>281/cg25548984                                                         | 0.712247112 | 0.623745276 | 0.479285747 | -0.232961365 | 5.51E-11 | 1.62E-09    |
| TSS1500 | TRDN    | 6  | 123959184                                                                  | cg14462830                                                                                   | 0.72351412  | 0.616815044 | 0.432497877 | -0.291016243 | 3.59E-08 | 2.61E-07    |
| TSS1500 | TREH    | 11 | 118550644/118551<br>771/118551168                                          | cg08498647/cg17695<br>682/cg25740070                                                         | 0.581995718 | 0.505011267 | 0.412755589 | -0.169240129 | 3.17E-09 | 3.46E-08    |
| TSS1500 | TREM2   | 6  | 41131863/4113205<br>5/41131213                                             | cg00718409/cg02539<br>671/cg25748868                                                         | 0.730799315 | 0.611025004 | 0.511847806 | -0.218951509 | 5.00E-11 | 1.55E-09    |
| TSS1500 | TREML1  | 6  | 41123396/4112308<br>6/41123110                                             | cg04710115/cg10792<br>307/cg15153887                                                         | 0.475444743 | 0.403416358 | 0.314912505 | -0.160532238 | 6.12E-11 | 1.71E-09    |
| TSS1500 | TREML4  | 6  | 41195195/4119509<br>2/41194812                                             | cg01552173/cg17295<br>842/cg25535435                                                         | 0.760755897 | 0.697347587 | 0.592525214 | -0.168230683 | 6.10E-06 | 2.37E-05    |
| TSS1500 | TRHDE   | 12 | 72665510/7266626<br>4/72665880/726662<br>81/72665376/72665<br>282/72665771 | cg01817029/cg02511<br>156/cg04775889/cg0<br>6622999/cg17771605<br>/cg18440199/cg2314<br>2394 | 0.235902135 | 0.300701726 | 0.453103565 | 0.21720143   | 5.41E-06 | 2.12E-05    |
| TSS1500 | TRIM31  | 6  | 30081408                                                                   | cg15238224                                                                                   | 0.44635788  | 0.339683289 | 0.264747577 | -0.181610303 | 2.28E-11 | 8.89E-10    |
| TSS1500 | TRIM42  | 3  | 140395771/140395<br>898                                                    | cg06339924/cg18814<br>069                                                                    | 0.521648123 | 0.413629797 | 0.31878273  | -0.202865393 | 1.65E-08 | 1.35E-07    |
| TSS1500 | TRIM61  | 4  | 165900224/165899<br>396/165900285                                          | cg00231192/cg20233<br>582/cg21550098                                                         | 0.86365995  | 0.821945225 | 0.704392261 | -0.159267689 | 1.68E-06 | 7.51E-06    |
| TSS1500 | TRIM63  | 1  | 26394593/2639443<br>5                                                      | cg06161375/cg13998<br>293                                                                    | 0.552648855 | 0.426710944 | 0.334190902 | -0.218457953 | 1.56E-10 | 3.35E-09    |
| TSS1500 | TRIM71  | 3  | 32858541/3285909<br>9/32858280                                             | cg08145617/cg14657<br>525/cg18310412                                                         | 0.108400209 | 0.163988728 | 0.307136231 | 0.198736022  | 5.53E-05 | 0.000172326 |
| TSS1500 | TRIM75  | 4  | 165979202                                                                  | cg23735682                                                                                   | 0.714337205 | 0.609817106 | 0.509495205 | -0.204842    | 1.01E-06 | 4.83E-06    |

|         |         |    |                                                                                                                                                                                                                                                   |    |                                                                                                                                                                                                                                                                                                       |             |             |             |              |          |          |
|---------|---------|----|---------------------------------------------------------------------------------------------------------------------------------------------------------------------------------------------------------------------------------------------------|----|-------------------------------------------------------------------------------------------------------------------------------------------------------------------------------------------------------------------------------------------------------------------------------------------------------|-------------|-------------|-------------|--------------|----------|----------|
| TSS1500 | TRIM77  | 11 | 89442829                                                                                                                                                                                                                                          | 1  | cg27391117                                                                                                                                                                                                                                                                                            | 0.74484231  | 0.645401172 | 0.572006695 | -0.172835615 | 6.66E-06 | 2.56E-05 |
| TSS1500 | TRIP6   | 7  | 100463985/100463<br>759/100464145/100<br>463508/100464553/<br>100463583                                                                                                                                                                           | 6  | cg01008256/cg04742<br>719/cg12967723/cg1<br>9279257/cg21406967<br>/cg26305174                                                                                                                                                                                                                         | 0.515007872 | 0.432765747 | 0.355556169 | -0.159451703 | 8.28E-12 | 4.90E-10 |
| TSS1500 | TRPM8   | 2  | 234824777/234824<br>933                                                                                                                                                                                                                           | 2  | cg12488871/cg15746<br>445                                                                                                                                                                                                                                                                             | 0.681576873 | 0.625594922 | 0.512412098 | -0.169164775 | 9.60E-08 | 6.13E-07 |
| TSS1500 | TRUB1   | 10 | 116697604/116697<br>070                                                                                                                                                                                                                           | 2  | cg03934681/cg08898<br>349                                                                                                                                                                                                                                                                             | 0.430034612 | 0.311587452 | 0.245818672 | -0.18421594  | 3.05E-09 | 3.36E-08 |
| TSS1500 | TSGA13  | 7  | 130372419/130372<br>807/130372167                                                                                                                                                                                                                 | 3  | cg02332073/cg10421<br>595/cg11058932                                                                                                                                                                                                                                                                  | 0.643008985 | 0.572044283 | 0.490231005 | -0.15277798  | 1.34E-06 | 6.16E-06 |
| TSS1500 | TSPAN12 | 7  | 120498729/120499<br>546                                                                                                                                                                                                                           | 2  | cg22032706/cg23627<br>038                                                                                                                                                                                                                                                                             | 0.618166025 | 0.460064511 | 0.394421307 | -0.223744718 | 1.55E-09 | 1.95E-08 |
| TSS1500 | TSPAN8  | 12 | 71552457/7155233<br>6/71552188/715525<br>69                                                                                                                                                                                                       | 4  | cg04950931/cg12965<br>512/cg15684563/cg1<br>9871235                                                                                                                                                                                                                                                   | 0.421708438 | 0.335905124 | 0.267752997 | -0.153955441 | 1.62E-11 | 7.24E-10 |
| TSS1500 | TTLL1   | 22 | 43485660/4348652<br>4/43486472                                                                                                                                                                                                                    | 3  | cg18982625/cg22637<br>865/cg25347941                                                                                                                                                                                                                                                                  | 0.582596383 | 0.507237454 | 0.418939579 | -0.163656805 | 5.40E-08 | 3.72E-07 |
| TSS1500 | TTN     | 2  | 179672691/179672<br>637                                                                                                                                                                                                                           | 2  | cg11111214/cg15133<br>917                                                                                                                                                                                                                                                                             | 0.713177923 | 0.568056803 | 0.455002148 | -0.258175775 | 9.18E-10 | 1.28E-08 |
| TSS1500 | TUBGCP2 | 10 | 135122875/135123<br>764/135123006/135<br>123239/135124069/<br>135123337/135123<br>067/135123421                                                                                                                                                   | 8  | cg02441467/cg07219<br>844/cg07908874/cg1<br>2275410/cg12642705<br>/cg16284674/cg1949<br>5428/cg24424217                                                                                                                                                                                               | 0.546987877 | 0.45691581  | 0.385182962 | -0.161804914 | 1.08E-10 | 2.58E-09 |
| TSS1500 | TWIST1  | 7  | 19157650/1915793<br>8/19158692/191578<br>39/19157813/19158<br>134/19158664/1915<br>8747/19157739/191<br>58721/19158123/19<br>158647/19158041/1<br>9157634/19158566/<br>19158210/1915800<br>1/19158666/191577<br>10/19158349/19158<br>030/19158378 | 22 | cg01202666/cg02400<br>740/cg04904385/cg0<br>4917226/cg06243400<br>/cg09674215/cg1012<br>6205/cg10624122/cg<br>11147786/cg1230748<br>4/cg12514789/cg143<br>91419/cg14515453/c<br>g14782672/cg161686<br>68/cg19064523/cg20<br>121142/cg21424940/<br>cg22498251/cg26279<br>021/cg27013696/cg2<br>7334919 | 0.334220304 | 0.405283853 | 0.529831818 | 0.195611514  | 1.32E-08 | 1.12E-07 |
| TSS1500 | UBQLN3  | 11 | 5531524                                                                                                                                                                                                                                           | 1  | cg15553770                                                                                                                                                                                                                                                                                            | 0.770926495 | 0.646663706 | 0.521146309 | -0.249780186 | 5.68E-08 | 3.89E-07 |
| TSS1500 | UCMA    | 10 | 13277824/1327689<br>2                                                                                                                                                                                                                             | 2  | cg03816954/cg27243<br>297                                                                                                                                                                                                                                                                             | 0.63790748  | 0.559738011 | 0.450752618 | -0.187154862 | 1.90E-06 | 8.40E-06 |

|         |        |    |                                                                                         |                                                                                              |             |             |             |              |             |             |
|---------|--------|----|-----------------------------------------------------------------------------------------|----------------------------------------------------------------------------------------------|-------------|-------------|-------------|--------------|-------------|-------------|
| TSS1500 | UCP1   | 4  | 141490377/141490<br>428/141491214/141 5<br>490351/141490354                             | cg07100771/cg09181<br>644/cg14078662/cg1<br>6512615/cg21325154                               | 0.741431015 | 0.670080028 | 0.541320591 | -0.200110424 | 6.89E-07    | 3.45E-06    |
| TSS1500 | UGT1A6 | 2  | 234601254/234599<br>026/234599988/234 6<br>600149/234600147/<br>234600423               | cg04449108/cg07512<br>295/cg09950076/cg1<br>2385643/cg14121772<br>/cg23338993                | 0.5552985   | 0.439026182 | 0.393610685 | -0.161687815 | 8.21E-10    | 1.17E-08    |
| TSS1500 | UGT1A8 | 2  | 234525618/234526 2<br>077                                                               | cg10596609/cg18313<br>132                                                                    | 0.458042645 | 0.352433189 | 0.266454164 | -0.191588481 | 4.20E-11    | 1.37E-09    |
| TSS1500 | UGT2B7 | 4  | 69960869                                                                                | cg04558553                                                                                   | 0.486010185 | 0.411888578 | 0.324395491 | -0.161614694 | 7.05E-09    | 6.58E-08    |
| TSS1500 | UGT8   | 4  | 115519006/115518 2<br>992                                                               | cg11950778/cg22609<br>233                                                                    | 0.57674276  | 0.463072719 | 0.389045302 | -0.187697458 | 2.41E-10    | 4.64E-09    |
| TSS1500 | UMOD   | 16 | 20364284                                                                                | cg17812431                                                                                   | 0.728370775 | 0.603621294 | 0.477368095 | -0.25100268  | 2.53E-08    | 1.95E-07    |
| TSS1500 | UNC45B | 17 | 33474376/3347388 2<br>1                                                                 | cg07264238/cg10174<br>170                                                                    | 0.61279604  | 0.510610611 | 0.410609023 | -0.202187017 | 1.35E-07    | 8.31E-07    |
| TSS1500 | UNC5C  | 4  | 96470626/9647110 6<br>5/96470993/964705<br>84/96471143/96470<br>887                     | cg01194057/cg12584<br>684/cg12802900/cg1<br>3265789/cg15701178<br>/cg21782409                | 0.219830513 | 0.338336784 | 0.487739705 | 0.267909192  | 5.65E-07    | 2.90E-06    |
| TSS1500 | UNC5CL | 6  | 41007485/4100769 4<br>2/41007450/410075<br>22                                           | cg15849648/cg17826<br>424/cg19175193/cg2<br>2346765                                          | 0.729970745 | 0.566412708 | 0.438502102 | -0.291468643 | 8.63E-14    | 4.43E-11    |
| TSS1500 | UNK    | 17 | 73780373/7378039 4<br>6/73780246/737800<br>35                                           | cg08301181/cg13182<br>713/cg25355213/cg2<br>6332052                                          | 0.430155931 | 0.32378419  | 0.236664827 | -0.193491104 | 2.94E-09    | 3.27E-08    |
| TSS1500 | USP44  | 12 | 95942964/9594311 5<br>4/95942907/959457<br>67/95942847                                  | cg07783282/cg09883<br>286/cg13879483/cg1<br>6192751/cg17368254                               | 0.196333114 | 0.242103689 | 0.431633    | 0.235299886  | 3.59E-05    | 0.000116746 |
| TSS1500 | UTF1   | 10 | 135043492/135043 4<br>508/135043506/135<br>042885                                       | cg02767771/cg03755<br>123/cg08708684/cg1<br>2465710                                          | 0.37683011  | 0.490416753 | 0.612698456 | 0.235868346  | 3.50E-08    | 2.56E-07    |
| TSS1500 | VASH1  | 14 | 77227574/7722786 5<br>0/77227570/772275<br>45/77227645                                  | cg02735446/cg07559<br>696/cg12825804/cg1<br>4124894/cg23948080                               | 0.176556459 | 0.181655931 | 0.337989367 | 0.161432909  | 0.00103921  | 0.002472472 |
| TSS1500 | VAT1L  | 16 | 77822083/7782213 2<br>5                                                                 | cg06165506/cg06989<br>330                                                                    | 0.090584311 | 0.131680684 | 0.253444695 | 0.162860384  | 0.001060526 | 0.00251719  |
| TSS1500 | VAV3   | 1  | 108508207/108508 7<br>548/108232421/108<br>508067/108508185/<br>108508113/108507<br>766 | cg05937496/cg06543<br>087/cg09896211/cg1<br>2619536/cg17099397<br>/cg19918758/cg2584<br>8557 | 0.248664977 | 0.383928911 | 0.484115169 | 0.235450192  | 3.55E-07    | 1.93E-06    |

|         |         |    |                                                       |   |                                                                   |             |             |             |              |          |          |
|---------|---------|----|-------------------------------------------------------|---|-------------------------------------------------------------------|-------------|-------------|-------------|--------------|----------|----------|
| TSS1500 | VCAM1   | 1  | 101184332/101185070/101184304                         | 3 | cg04295372/cg04743650/cg25763716                                  | 0.49824432  | 0.442099406 | 0.333153561 | -0.165090759 | 1.28E-08 | 1.09E-07 |
| TSS1500 | VEGFC   | 4  | 177714373/177714350/177714456/177415040               | 4 | cg01590753/cg06679347/cg17177660/cg24194285                       | 0.384570977 | 0.409092681 | 0.559936502 | 0.175365525  | 1.32E-05 | 4.73E-05 |
| TSS1500 | VHLL    | 1  | 156270260/156270253/156270918/156270281               | 4 | cg05795077/cg08656082/cg12664795/cg16558208                       | 0.716687372 | 0.64059177  | 0.522653977 | -0.194033394 | 1.21E-08 | 1.04E-07 |
| TSS1500 | VILL    | 3  | 38033770/38033934/38034235                            | 3 | cg03203287/cg05673892/cg06641593                                  | 0.63210314  | 0.536947737 | 0.442891745 | -0.189211395 | 5.03E-09 | 5.06E-08 |
| TSS1500 | VNN1    | 6  | 133036573/133036545/133036651                         | 3 | cg01052291/cg22498396/cg22618219                                  | 0.655706088 | 0.517355744 | 0.412301364 | -0.243404724 | 5.88E-13 | 1.04E-10 |
| TSS1500 | VPREB1  | 22 | 22597869/22597965/22598937                            | 3 | cg01891260/cg04776489/cg14844130                                  | 0.353633734 | 0.258033336 | 0.178746913 | -0.174886821 | 2.54E-13 | 7.42E-11 |
| TSS1500 | VSTM2B  | 19 | 30016147/30016478/30016511/30016136                   | 4 | cg01464835/cg02012703/cg05395302/cg18802754                       | 0.384355415 | 0.491734456 | 0.61733325  | 0.232977835  | 2.36E-07 | 1.36E-06 |
| TSS1500 | VSX1    | 20 | 25064127/25063052/25063817                            | 3 | cg17650274/cg19592637/cg23097006                                  | 0.477176173 | 0.564642289 | 0.667121195 | 0.189945022  | 6.62E-09 | 6.28E-08 |
| TSS1500 | WBP11P1 | 18 | 30091235/30090866                                     | 2 | cg13340705/cg16566595                                             | 0.71459601  | 0.636055753 | 0.552891389 | -0.161704621 | 1.81E-07 | 1.07E-06 |
| TSS1500 | WBSCR17 | 7  | 70596377/70597091/70597058/70597065/70597458/70596308 | 6 | cg01159623/cg01366419/cg02300154/cg03044249/cg03893271/cg10239388 | 0.394991448 | 0.47322018  | 0.639233247 | 0.244241799  | 9.68E-11 | 2.39E-09 |
| TSS1500 | WDR12   | 2  | 203777863/203778143                                   | 2 | cg15057621/cg17745291                                             | 0.66161852  | 0.567587578 | 0.453666141 | -0.207952379 | 5.32E-09 | 5.29E-08 |
| TSS1500 | WDR36   | 5  | 110427072/110427346/110427112                         | 3 | cg00601387/cg11585022/cg18807895                                  | 0.580139953 | 0.463570969 | 0.320444241 | -0.259695712 | 3.58E-12 | 3.11E-10 |
| TSS1500 | WDR59   | 16 | 75020429/75019382/75019367                            | 3 | cg00519320/cg05828191/cg16379316                                  | 0.601968697 | 0.524578172 | 0.450119017 | -0.15184968  | 8.12E-07 | 4.00E-06 |

|         |       |    |                                                                                                                                                                                                                            |                                                                                                                                                                                                                                                                                                       |             |             |             |              |             |             |
|---------|-------|----|----------------------------------------------------------------------------------------------------------------------------------------------------------------------------------------------------------------------------|-------------------------------------------------------------------------------------------------------------------------------------------------------------------------------------------------------------------------------------------------------------------------------------------------------|-------------|-------------|-------------|--------------|-------------|-------------|
| TSS1500 | WDR8  | 1  | 3567870/3567303/3<br>568004/3566992/35<br>67646/3567719/356<br>8154/3566963/3567<br>852/3568124/35674<br>12/3567119/356721 22<br>4/3567930/3567408<br>/3567109/3567163/<br>3566950/3567986/3<br>567732/3567738/35<br>67550 | cg01434649/cg04021<br>697/cg04391111/cg0<br>4865841/cg07382920<br>/cg10038618/cg1014<br>3426/cg11256802/cg<br>12475507/cg1478192<br>2/cg16823083/cg180<br>21902/cg19135761/c<br>g20611911/cg210000<br>72/cg21012455/cg22<br>614891/cg22822803/<br>cg24073122/cg24678<br>611/cg25731359/cg2<br>6128092 | 0.364920319 | 0.467848881 | 0.620655629 | 0.25573531   | 6.34E-12    | 4.16E-10    |
| TSS1500 | WDR86 | 7  | 151107807/151108<br>340/151107637/151 5<br>107924/151107400                                                                                                                                                                | cg00878038/cg03693<br>105/cg16482474/cg1<br>9831077/cg21532325                                                                                                                                                                                                                                        | 0.367021215 | 0.434092614 | 0.527694646 | 0.160673431  | 2.25E-05    | 7.65E-05    |
| TSS1500 | WIPF3 | 7  | 29873076/2987378 3<br>6/29872894                                                                                                                                                                                           | cg18581663/cg24384<br>632/cg25037274                                                                                                                                                                                                                                                                  | 0.702222167 | 0.646635256 | 0.526807121 | -0.175415045 | 4.42E-08    | 3.13E-07    |
| TSS1500 | WNT3  | 17 | 44897512/4489692<br>3/44896748/448964<br>24/44896877/44897 7<br>024/44897431                                                                                                                                               | cg00817598/cg02017<br>282/cg03186851/cg1<br>2379948/cg13998093<br>/cg15237742/cg2411<br>4556                                                                                                                                                                                                          | 0.212191774 | 0.261458875 | 0.368208683 | 0.156016909  | 1.15E-05    | 4.19E-05    |
| TSS1500 | WSB1  | 17 | 25620677/2561974<br>3/25619946/256205 5<br>96/25620638                                                                                                                                                                     | cg02789515/cg05922<br>422/cg07564598/cg1<br>5326755/cg23536675                                                                                                                                                                                                                                        | 0.789047844 | 0.654636015 | 0.565146146 | -0.223901698 | 4.03E-10    | 6.77E-09    |
| TSS1500 | WT1   | 11 | 32457878/3245772 3<br>7/32457386                                                                                                                                                                                           | cg12600018/cg22975<br>913/cg26232818                                                                                                                                                                                                                                                                  | 0.182944365 | 0.213337707 | 0.375527668 | 0.192583303  | 0.000668507 | 0.001655908 |
| TSS1500 | XDH   | 2  | 31638511/3163784 2<br>9                                                                                                                                                                                                    | cg09239591/cg09842<br>053                                                                                                                                                                                                                                                                             | 0.55308488  | 0.435740339 | 0.3470439   | -0.20604098  | 1.77E-11    | 7.71E-10    |
| TSS1500 | XKR4  | 8  | 56013556/5601380<br>0/56014406/560144 4<br>33                                                                                                                                                                              | cg08417620/cg09388<br>605/cg09524907/cg2<br>0948997                                                                                                                                                                                                                                                   | 0.293191333 | 0.29172405  | 0.443875378 | 0.150684045  | 0.000153748 | 0.000434563 |
| TSS1500 | YIPF7 | 4  | 44654206 1                                                                                                                                                                                                                 | cg03815116                                                                                                                                                                                                                                                                                            | 0.65073397  | 0.494116667 | 0.3368489   | -0.31388507  | 1.87E-12    | 2.06E-10    |
| TSS1500 | YOD1  | 1  | 207225647/207225<br>128/207224740/207 5<br>225424/207224982                                                                                                                                                                | cg01380361/cg02710<br>090/cg05398095/cg0<br>6119874/cg24040043                                                                                                                                                                                                                                        | 0.631585616 | 0.486708478 | 0.375190038 | -0.256395579 | 6.27E-12    | 4.16E-10    |

|         |        |    |                                                                                                                                                                                                                            |    |                                                                                                                                                                                                                                                   |             |             |             |              |             |             |
|---------|--------|----|----------------------------------------------------------------------------------------------------------------------------------------------------------------------------------------------------------------------------|----|---------------------------------------------------------------------------------------------------------------------------------------------------------------------------------------------------------------------------------------------------|-------------|-------------|-------------|--------------|-------------|-------------|
| TSS1500 | ZBTB11 | 3  | 101396658/101396855/101396897                                                                                                                                                                                              | 3  | cg02395779/cg05405742/cg05890243                                                                                                                                                                                                                  | 0.660308475 | 0.557454997 | 0.454581139 | -0.205727336 | 2.20E-08    | 1.73E-07    |
| TSS1500 | ZBTB32 | 19 | 36203512/36202390/36203089                                                                                                                                                                                                 | 3  | cg03068068/cg09231418/cg12497692                                                                                                                                                                                                                  | 0.546518783 | 0.456254374 | 0.37350443  | -0.173014353 | 1.31E-08    | 1.11E-07    |
| TSS1500 | ZC3H8  | 2  | 113013154/113012921                                                                                                                                                                                                        | 2  | cg00535466/cg09759808                                                                                                                                                                                                                             | 0.589286333 | 0.5261378   | 0.437825757 | -0.151460576 | 4.87E-09    | 4.94E-08    |
| TSS1500 | ZFP28  | 19 | 57049530/57049695/57049857/57049777                                                                                                                                                                                        | 4  | cg03305181/cg12973930/cg23850212/cg25963041                                                                                                                                                                                                       | 0.290740397 | 0.323551596 | 0.441215127 | 0.150474731  | 0.004281556 | 0.009014451 |
| TSS1500 | ZG16   | 16 | 29789103                                                                                                                                                                                                                   | 1  | cg09229061                                                                                                                                                                                                                                        | 0.70386272  | 0.569923422 | 0.460841123 | -0.243021597 | 2.05E-10    | 4.12E-09    |
| TSS1500 | ZIC1   | 3  | 147125955/147126753/147126961/147125926/147125758/147125962/14712638/147126244/147125765/147126121/147125924/147126444/147126206/147126403/147126703/147125714/147125712/147125942/147126425/147125782/147126763/147126119 | 22 | cg00475509/cg02519751/cg05700079/cg07291439/cg08070771/cg08855449/cg09241332/cg10107050/cg11142389/cg12419052/cg12965599/cg15002294/cg16181396/cg16636671/cg17280346/cg17546247/cg23189410/cg23449696/cg23468878/cg24686610/cg26014538/cg26400885 | 0.514521073 | 0.604640659 | 0.721842117 | 0.207321045  | 1.96E-10    | 3.97E-09    |

|         |         |    |                                                                                                                                                                                                                                                                                         |    |                                                                                                                                                                                                                                                                                                                     |             |             |             |              |          |             |
|---------|---------|----|-----------------------------------------------------------------------------------------------------------------------------------------------------------------------------------------------------------------------------------------------------------------------------------------|----|---------------------------------------------------------------------------------------------------------------------------------------------------------------------------------------------------------------------------------------------------------------------------------------------------------------------|-------------|-------------|-------------|--------------|----------|-------------|
| TSS1500 | ZIC4    | 3  | 147111280/147110595/147123457/147124827/147124363/147111135/147111660/147124543/147122664/147124523/147125758/147125765/147110499/147125114/147125287/147110667/147123429/147111308/147125714/147123475/147124417/147123123/147125712/147123199/147125782/147122315/147124687/147111120 | 28 | cg00154357/cg01581018/cg02387803/cg02820514/cg03355998/cg03881775/cg03900143/cg05548555/cg06166523/cg06369327/cg08070771/cg11142389/cg12388007/cg13015925/cg13278496/cg13340636/cg16790847/cg17003736/cg17546247/cg19516404/cg21127068/cg21639713/cg23189410/cg24620761/cg24686610/cg26224785/cg26791399/cg27606499 | 0.358553099 | 0.425560582 | 0.530670317 | 0.172117218  | 7.51E-09 | 6.96E-08    |
| TSS1500 | ZIK1    | 19 | 58095424/58095155/58094517/58095011                                                                                                                                                                                                                                                     | 4  | cg02653557/cg06707978/cg17798563/cg21911021                                                                                                                                                                                                                                                                         | 0.512088898 | 0.607626404 | 0.699078256 | 0.186989358  | 7.72E-12 | 4.85E-10    |
| TSS1500 | ZKSCAN1 | 7  | 99612634/99612773/99612715                                                                                                                                                                                                                                                              | 3  | cg02891218/cg07125725/cg21540035                                                                                                                                                                                                                                                                                    | 0.58125791  | 0.441799652 | 0.384122103 | -0.197135807 | 1.10E-13 | 4.63E-11    |
| TSS1500 | ZNF132  | 19 | 58951814/58952361/58951885/58952108/58952249                                                                                                                                                                                                                                            | 5  | cg00868383/cg03043130/cg07878486/cg11618529/cg16929496                                                                                                                                                                                                                                                              | 0.258725671 | 0.382328816 | 0.467619038 | 0.208893367  | 4.04E-06 | 1.64E-05    |
| TSS1500 | ZNF154  | 19 | 58220818/58220837                                                                                                                                                                                                                                                                       | 2  | cg01268824/cg27324426                                                                                                                                                                                                                                                                                               | 0.498936993 | 0.640335011 | 0.713483861 | 0.214546869  | 1.19E-09 | 1.58E-08    |
| TSS1500 | ZNF169  | 9  | 97020667                                                                                                                                                                                                                                                                                | 1  | cg14220634                                                                                                                                                                                                                                                                                                          | 0.557733235 | 0.457490872 | 0.355628891 | -0.202104344 | 9.54E-12 | 5.16E-10    |
| TSS1500 | ZNF177  | 19 | 9472210/9473058/9473240                                                                                                                                                                                                                                                                 | 3  | cg09492640/cg14323854/cg19275200                                                                                                                                                                                                                                                                                    | 0.5429892   | 0.422993233 | 0.317120995 | -0.225868205 | 7.82E-13 | 1.26E-10    |
| TSS1500 | ZNF229  | 19 | 44953982/44953377                                                                                                                                                                                                                                                                       | 2  | cg19772066/cg26535330                                                                                                                                                                                                                                                                                               | 0.733923575 | 0.659407664 | 0.580021082 | -0.153902493 | 7.26E-08 | 4.80E-07    |
| TSS1500 | ZNF256  | 19 | 58459358/58459283                                                                                                                                                                                                                                                                       | 2  | cg02959669/cg12048031                                                                                                                                                                                                                                                                                               | 0.091643475 | 0.136415784 | 0.291683919 | 0.200040444  | 6.03E-05 | 0.000186288 |
| TSS1500 | ZNF283  | 19 | 44331009/44331239/44330665/44330910                                                                                                                                                                                                                                                     | 4  | cg04895616/cg06574716/cg18514705/cg25309775                                                                                                                                                                                                                                                                         | 0.566995222 | 0.627872415 | 0.718635538 | 0.151640316  | 2.03E-08 | 1.61E-07    |
| TSS1500 | ZNF300  | 5  | 150284600/150284796                                                                                                                                                                                                                                                                     | 2  | cg18237551/cg21228005                                                                                                                                                                                                                                                                                               | 0.367075915 | 0.360543939 | 0.578431705 | 0.21135579   | 5.11E-05 | 0.000160396 |

|         |         |    |                                                                   |   |                                                                               |             |             |             |              |             |             |
|---------|---------|----|-------------------------------------------------------------------|---|-------------------------------------------------------------------------------|-------------|-------------|-------------|--------------|-------------|-------------|
| TSS1500 | ZNF304  | 19 | 57862442/5786224<br>2/57862410                                    | 3 | cg10157975/cg22376<br>081/cg23250910                                          | 0.065461025 | 0.200111538 | 0.321294501 | 0.255833476  | 1.10E-06    | 5.18E-06    |
| TSS1500 | ZNF347  | 19 | 53662594/5366262<br>0/53662499/536626<br>80/53662958/53662<br>723 | 6 | cg03434128/cg04254<br>066/cg15167155/cg1<br>5584946/cg19722781<br>/cg24708545 | 0.272944047 | 0.360317284 | 0.490563301 | 0.217619254  | 5.91E-05    | 0.000182758 |
| TSS1500 | ZNF354C | 5  | 178487123/178487<br>382/178487384/178<br>487310                   | 4 | cg08522107/cg10864<br>596/cg12623648/cg1<br>9761115                           | 0.162476908 | 0.239685872 | 0.401820943 | 0.239344035  | 0.000108386 | 0.000317461 |
| TSS1500 | ZNF382  | 19 | 37095681/3709601<br>0/37095466/370957<br>457                      | 4 | cg09430118/cg19406<br>736/cg24871714/cg2<br>7658967                           | 0.271240398 | 0.404384565 | 0.540972873 | 0.269732475  | 6.94E-09    | 6.50E-08    |
| TSS1500 | ZNF454  | 5  | 178367423/178367<br>621/178367827                                 | 3 | cg02031359/cg17741<br>986/cg24843380                                          | 0.470541208 | 0.532250313 | 0.64055532  | 0.170014111  | 6.72E-09    | 6.35E-08    |
| TSS1500 | ZNF469  | 16 | 88492755/8849286<br>8/88493613                                    | 3 | cg03892041/cg04675<br>221/cg27245950                                          | 0.73823703  | 0.678512944 | 0.578940005 | -0.159297025 | 2.67E-07    | 1.51E-06    |
| TSS1500 | ZNF471  | 19 | 57018614/5701900<br>5/57018933/570188<br>48                       | 4 | cg00711090/cg14042<br>851/cg14277392/cg1<br>4289985                           | 0.272664298 | 0.304327608 | 0.448504634 | 0.175840336  | 2.63E-06    | 1.12E-05    |
| TSS1500 | ZNF479  | 7  | 57208277/5720795<br>2                                             | 2 | cg10652558/cg20306<br>025                                                     | 0.646167473 | 0.597221094 | 0.468992086 | -0.177175386 | 3.92E-08    | 2.82E-07    |
| TSS1500 | ZNF484  | 9  | 95640659                                                          | 1 | cg14646548                                                                    | 0.676359665 | 0.519359111 | 0.425553664 | -0.250806001 | 4.63E-12    | 3.51E-10    |
| TSS1500 | ZNF512B | 20 | 62601662/6260155<br>6/62601568/626017<br>43                       | 4 | cg03065311/cg16746<br>938/cg23931672/cg2<br>6760212                           | 0.221317378 | 0.292906869 | 0.392666678 | 0.1713493    | 0.000246521 | 0.000667355 |
| TSS1500 | ZNF543  | 19 | 57831632/5783154<br>4/57831549/578316<br>62                       | 4 | cg00846300/cg14383<br>655/cg14603375/cg1<br>9533530                           | 0.096920063 | 0.268037434 | 0.374851989 | 0.277931926  | 0.000275525 | 0.000738703 |
| TSS1500 | ZNF544  | 19 | 58739805/5873980<br>3/58739778/587397<br>34                       | 4 | cg11279918/cg21020<br>710/cg21994576/cg2<br>6263766                           | 0.091791085 | 0.169904413 | 0.272457184 | 0.180666099  | 0.000418687 | 0.001080986 |
| TSS1500 | ZNF568  | 19 | 37406349/3740693<br>2/37406949                                    | 3 | cg09560297/cg15746<br>891/cg21292152                                          | 0.280337563 | 0.371768881 | 0.455913321 | 0.175575758  | 5.49E-05    | 0.000171157 |
| TSS1500 | ZNF582  | 19 | 56905152/5690538<br>3/56905094                                    | 3 | cg07135042/cg07778<br>983/cg25267765                                          | 0.499889563 | 0.593394981 | 0.693164416 | 0.193274853  | 5.38E-08    | 3.70E-07    |
| TSS1500 | ZNF586  | 19 | 58280728/5827972<br>4/58280767/582808<br>01                       | 4 | cg08140458/cg09859<br>795/cg13382661/cg2<br>7046034                           | 0.574240878 | 0.663384878 | 0.749990068 | 0.175749191  | 1.29E-10    | 2.92E-09    |
| TSS1500 | ZNF619  | 3  | 40518138/4051809<br>1                                             | 2 | cg12176605/cg21942<br>438                                                     | 0.648849048 | 0.537052625 | 0.4616731   | -0.187175948 | 5.69E-09    | 5.57E-08    |



|         |         |    |                                                                       |   |                                                                              |             |             |             |              |          |             |
|---------|---------|----|-----------------------------------------------------------------------|---|------------------------------------------------------------------------------|-------------|-------------|-------------|--------------|----------|-------------|
| TSS1500 | ZNF620  | 3  | 40547217/40547232                                                     | 2 | cg074448319/cg13461273                                                       | 0.445257293 | 0.3670533   | 0.290535611 | -0.154721681 | 2.98E-09 | 3.31E-08    |
| TSS1500 | ZNF625  | 19 | 12267796/12267776/12267734                                            | 3 | cg02842629/cg17456704/cg24115221                                             | 0.094828471 | 0.218627344 | 0.383485125 | 0.288656654  | 4.46E-05 | 0.000142206 |
| TSS1500 | ZNF648  | 1  | 182031601                                                             | 1 | cg13498800                                                                   | 0.67062413  | 0.582208533 | 0.478677968 | -0.191946162 | 3.85E-08 | 2.77E-07    |
| TSS1500 | ZNF667  | 19 | 56989102/56989543/56989812/56989740                                   | 4 | cg03289872/cg08063125/cg21287936/cg24411929                                  | 0.414287348 | 0.566804689 | 0.724532957 | 0.310245609  | 2.10E-11 | 8.50E-10    |
| TSS1500 | ZNF671  | 19 | 58239222/58239424                                                     | 2 | cg21305471/cg22001557                                                        | 0.434555714 | 0.516558613 | 0.659281339 | 0.224725624  | 1.08E-08 | 9.47E-08    |
| TSS1500 | ZNF677  | 19 | 53758521/53758609                                                     | 2 | cg04154138/cg16708981                                                        | 0.35791966  | 0.495035972 | 0.645107336 | 0.287187676  | 2.36E-11 | 9.09E-10    |
| TSS1500 | ZNF688  | 16 | 30584858/30584674                                                     | 2 | cg03945387/cg07300610                                                        | 0.701700785 | 0.572555378 | 0.499054925 | -0.20264586  | 1.35E-10 | 3.01E-09    |
| TSS1500 | ZNF705A | 12 | 8324628/8324153                                                       | 2 | cg12193649/cg20325280                                                        | 0.531736225 | 0.398408633 | 0.289799809 | -0.241936416 | 1.50E-12 | 1.85E-10    |
| TSS1500 | ZNF75A  | 16 | 3354207/3355079                                                       | 2 | cg02825709/cg07949597                                                        | 0.603154285 | 0.733300611 | 0.818337745 | 0.21518346   | 2.97E-09 | 3.30E-08    |
| TSS1500 | ZNF790  | 19 | 37329498/37329859/37329760/37329500/37329666/37329517                 | 6 | cg02343318/cg04803153/cg07808761/cg16646909/cg17656260/cg25772438            | 0.390937583 | 0.471806543 | 0.597862544 | 0.206924961  | 1.03E-09 | 1.41E-08    |
| TSS1500 | ZNF793  | 19 | 37997294/37997471                                                     | 2 | cg11623861/cg17332326                                                        | 0.095571162 | 0.228164667 | 0.381753861 | 0.286182699  | 1.72E-05 | 6.01E-05    |
| TSS1500 | ZNF80   | 3  | 113957903/113957908                                                   | 2 | cg03109316/cg11380748                                                        | 0.83477924  | 0.715704675 | 0.602813348 | -0.231965892 | 1.62E-06 | 7.26E-06    |
| TSS1500 | ZNF804A | 2  | 185462269/185462493/185462408/185462397/185462655/185462847/185462338 | 7 | cg01715143/cg01968493/cg11811513/cg13121699/cg15577595/cg21739754/cg24166893 | 0.191639624 | 0.294429471 | 0.415138829 | 0.223499205  | 1.17E-07 | 7.32E-07    |
| TSS1500 | ZNF804B | 7  | 88388244/88387861                                                     | 2 | cg09591286/cg12745764                                                        | 0.168159466 | 0.234363019 | 0.337595722 | 0.169436257  | 3.04E-05 | 0.000100612 |
| TSS1500 | ZNF805  | 19 | 57751816/57751691/57751591                                            | 3 | cg01607934/cg02446106/cg03252986                                             | 0.27841615  | 0.410302136 | 0.541371161 | 0.262955012  | 6.60E-10 | 9.85E-09    |
| TSS1500 | ZNF813  | 19 | 53970618/53970585/53970754                                            | 3 | cg05503527/cg09435109/cg13948710                                             | 0.146824803 | 0.20720027  | 0.363508075 | 0.216683272  | 1.86E-06 | 8.21E-06    |
| TSS1500 | ZNF829  | 19 | 37407462/37407486/37407889/37407413                                   | 4 | cg03443751/cg20154403/cg21117780/cg26612849                                  | 0.138315112 | 0.255437701 | 0.384277621 | 0.245962509  | 4.27E-05 | 0.000136861 |
| TSS1500 | ZNF880  | 19 | 52872916                                                              | 1 | cg22080027                                                                   | 0.339262505 | 0.44441555  | 0.544427895 | 0.20516539   | 6.09E-05 | 0.000187773 |
| TSS1500 | ZNHIT6  | 1  | 86174739/86175136/86174929/86174607/86174642                          | 5 | cg17807903/cg18878378/cg22676901/cg23216685/cg27462398                       | 0.636343953 | 0.522373814 | 0.417289657 | -0.219054296 | 3.09E-10 | 5.60E-09    |

|         |         |    |                                                                |   |                                                                              |             |             |             |              |          |             |
|---------|---------|----|----------------------------------------------------------------|---|------------------------------------------------------------------------------|-------------|-------------|-------------|--------------|----------|-------------|
| TSS1500 | ZP4     | 1  | 238055429/238054569                                            | 2 | cg03673470/cg26810908                                                        | 0.663329823 | 0.502237561 | 0.392643039 | -0.270686784 | 2.06E-11 | 8.38E-10    |
| TSS1500 | ZPBP    | 7  | 50133212/50133131/50133100                                     | 3 | cg00303745/cg09921682/cg10349880                                             | 0.84136324  | 0.669956002 | 0.48186017  | -0.35950307  | 3.20E-12 | 2.87E-10    |
| TSS1500 | ZSCAN1  | 19 | 58545122/58545001/58545149/58545160/58545182                   | 5 | cg11312896/cg14886059/cg21331821/cg24368848/cg25537993                       | 0.544930566 | 0.643858004 | 0.739010143 | 0.194079577  | 2.06E-09 | 2.45E-08    |
| TSS1500 | ZSCAN12 | 6  | 28367883/28367749/28367898                                     | 3 | cg07660236/cg20275132/cg21488066                                             | 0.41985598  | 0.502801883 | 0.612002164 | 0.192146184  | 1.23E-05 | 4.45E-05    |
| TSS1500 | ZSCAN23 | 6  | 28412636/28412139/28412459                                     | 3 | cg00249576/cg01837113/cg23847843                                             | 0.810580558 | 0.720399025 | 0.60841772  | -0.202162837 | 2.47E-10 | 4.71E-09    |
| TSS200  | DEC1    | 9  | 117903983                                                      | 1 | cg16682686                                                                   | 0.761866575 | 0.663234317 | 0.544463618 | -0.217402957 | 9.09E-08 | 1.01E-06    |
| TSS200  | MARCH1  | 4  | 165304473/16530496/165304531/165304488/165304540/165304443     | 6 | cg00032805/cg10127275/cg10943359/cg21169914/cg21300373/cg22299454            | 0.345778885 | 0.422284654 | 0.547985671 | 0.202206786  | 7.86E-08 | 8.90E-07    |
| TSS200  | MARCH11 | 5  | 16180048/16180055/16180072/16180062/16180068/16180076/16180033 | 7 | cg00339556/cg01791874/cg16150752/cg17030173/cg17712694/cg21901718/cg25092681 | 0.288388658 | 0.381014661 | 0.566613481 | 0.278224823  | 2.14E-06 | 1.68E-05    |
| TSS200  | A1BG    | 19 | 58864876/58864922/58864929                                     | 3 | cg02957155/cg04269689/cg17498272                                             | 0.738497243 | 0.639695161 | 0.528866241 | -0.209631002 | 2.32E-10 | 7.10E-09    |
| TSS200  | ABCA8   | 17 | 66951572                                                       | 1 | cg27464144                                                                   | 0.51720667  | 0.416295917 | 0.309227664 | -0.207979006 | 1.56E-12 | 2.73E-10    |
| TSS200  | ABCC11  | 16 | 48266305/48269105                                              | 2 | cg07383076/cg25274975                                                        | 0.5685022   | 0.461615661 | 0.343803182 | -0.224699018 | 4.87E-12 | 5.26E-10    |
| TSS200  | ABCC2   | 10 | 101542449                                                      | 1 | cg09448875                                                                   | 0.574886295 | 0.452145    | 0.352785186 | -0.222101109 | 2.64E-12 | 4.00E-10    |
| TSS200  | ACAN    | 15 | 89346629                                                       | 1 | cg16968596                                                                   | 0.207001321 | 0.401839487 | 0.631561205 | 0.424559884  | 6.38E-07 | 5.67E-06    |
| TSS200  | ACER1   | 19 | 6333761/6333701                                                | 2 | cg17667294/cg19440035                                                        | 0.508393625 | 0.408996622 | 0.312122845 | -0.19627078  | 2.59E-13 | 1.20E-10    |
| TSS200  | ACSS2   | 20 | 33462656/33462683                                              | 2 | cg09801828/cg22989379                                                        | 0.618966915 | 0.502109067 | 0.406813632 | -0.212153283 | 2.94E-10 | 8.62E-09    |
| TSS200  | ACSS3   | 12 | 81471678/81471649/81471754/81471757                            | 4 | cg11659501/cg21754400/cg23614791/cg25358039                                  | 0.286447766 | 0.497189308 | 0.572053364 | 0.285605598  | 2.17E-08 | 2.94E-07    |
| TSS200  | ACTA1   | 1  | 229569894/229569902/229569892/229569877/229569965/229569969    | 6 | cg02767613/cg04030615/cg05347845/cg14852384/cg25792990/cg26163852            | 0.245709466 | 0.291858642 | 0.437069386 | 0.19135992   | 1.05E-06 | 8.94E-06    |
| TSS200  | ACTBL2  | 5  | 56778651                                                       | 1 | cg20772593                                                                   | 0.770452585 | 0.662244533 | 0.518878727 | -0.251573858 | 3.09E-10 | 8.96E-09    |
| TSS200  | ACTN2   | 1  | 236849653                                                      | 1 | cg14932016                                                                   | 0.27037604  | 0.281198133 | 0.474309027 | 0.203932987  | 2.54E-05 | 0.000151296 |

|        |          |    |                                                                                              |    |                                                                                                                                                  |             |             |             |              |             |             |
|--------|----------|----|----------------------------------------------------------------------------------------------|----|--------------------------------------------------------------------------------------------------------------------------------------------------|-------------|-------------|-------------|--------------|-------------|-------------|
| TSS200 | ADAM28   | 8  | 24151514/2415147<br>2                                                                        | 2  | cg17969683/cg18757<br>155                                                                                                                        | 0.346509395 | 0.216299969 | 0.182859208 | -0.163650188 | 6.98E-07    | 6.15E-06    |
| TSS200 | ADAM3A   | 8  | 39380592                                                                                     | 1  | cg07927909                                                                                                                                       | 0.771113865 | 0.664860067 | 0.610387159 | -0.160726706 | 1.55E-05    | 9.79E-05    |
| TSS200 | ADAM5P   | 8  | 39172120/3917202<br>2/39172111/391720<br>20/39172097/39172<br>099                            | 6  | cg07387286/cg10327<br>428/cg11199639/cg1<br>1583762/cg14742937<br>/cg19659741                                                                    | 0.538381784 | 0.635769374 | 0.713173556 | 0.174791772  | 5.81E-08    | 6.86E-07    |
| TSS200 | ADAM6    | 14 | 106438465/106438<br>519                                                                      | 2  | cg03899708/cg12797<br>492                                                                                                                        | 0.635713118 | 0.577081303 | 0.476884327 | -0.15882879  | 3.94E-12    | 4.83E-10    |
| TSS200 | ADAMTS16 | 5  | 5140406                                                                                      | 1  | cg01717727                                                                                                                                       | 0.375045035 | 0.4556967   | 0.623165405 | 0.24812037   | 2.18E-10    | 6.83E-09    |
| TSS200 | ADAMTS18 | 16 | 77469167                                                                                     | 1  | cg02186542                                                                                                                                       | 0.273228825 | 0.282129683 | 0.439599427 | 0.166370602  | 5.54E-05    | 0.00030285  |
| TSS200 | ADAMTS2  | 5  | 178772372/178772<br>385/178772390                                                            | 3  | cg13909534/cg18331<br>515/cg26429655                                                                                                             | 0.182990746 | 0.2626889   | 0.337992382 | 0.155001635  | 2.05E-05    | 0.000125361 |
| TSS200 | ADAMTS5  | 21 | 28339442/2833948<br>7/28339477                                                               | 3  | cg08190291/cg13601<br>496/cg19523085                                                                                                             | 0.220681917 | 0.294013407 | 0.471714923 | 0.251033006  | 2.01E-06    | 1.59E-05    |
| TSS200 | ADARB2   | 10 | 1779835/1779904/1<br>779819/1779730/17<br>79760                                              | 5  | cg02899206/cg03410<br>436/cg06730723/cg1<br>4590817/cg24184687                                                                                   | 0.120993329 | 0.238864613 | 0.388903645 | 0.267910317  | 2.21E-06    | 1.73E-05    |
| TSS200 | ADCY4    | 14 | 24804022/2480390<br>3/24803917/248038<br>73/24803925                                         | 5  | cg12265829/cg13631<br>572/cg16215203/cg2<br>3179456/cg25556905                                                                                   | 0.163532662 | 0.21288422  | 0.371171979 | 0.207639316  | 0.004127831 | 0.014884922 |
| TSS200 | ADCY5    | 3  | 123167522/123167<br>507                                                                      | 2  | cg04138502/cg15993<br>383                                                                                                                        | 0.263099946 | 0.310493049 | 0.50221849  | 0.239118544  | 1.60E-06    | 1.30E-05    |
| TSS200 | ADCY8    | 8  | 132052870/132052<br>934/132052942/132<br>052843/132052887                                    | 5  | cg07557260/cg16696<br>270/cg22060073/cg2<br>2762091/cg26332560                                                                                   | 0.33809967  | 0.427895521 | 0.561584072 | 0.223484402  | 7.77E-11    | 3.26E-09    |
| TSS200 | ADCYAP1  | 18 | 905156/905180/905<br>252/905127/904899<br>/904851/905101/90<br>4920/904885/90517<br>7/904878 | 11 | cg00128702/cg11773<br>720/cg14200170/cg1<br>5194943/cg15458338<br>/cg16457786/cg1705<br>9658/cg18319029/cg<br>21438101/cg2238895<br>4/cg24287438 | 0.276022909 | 0.405755226 | 0.544920581 | 0.268897672  | 2.45E-07    | 2.41E-06    |
| TSS200 | ADD2     | 2  | 70995440/7099552<br>2/70995351/709954<br>59/70995444/70995<br>349/70995527                   | 7  | cg03384579/cg05659<br>187/cg08857144/cg1<br>5170605/cg23427269<br>/cg24347663/cg2563<br>1352                                                     | 0.121104374 | 0.227999381 | 0.42689553  | 0.305791156  | 1.37E-05    | 8.75E-05    |
| TSS200 | ADH6     | 4  | 100140474                                                                                    | 1  | cg10099209                                                                                                                                       | 0.58879384  | 0.465720711 | 0.338628314 | -0.250165526 | 1.80E-11    | 1.22E-09    |

|        |         |    |                                                                                                               |    |                                                                                                                                       |             |             |             |              |             |             |
|--------|---------|----|---------------------------------------------------------------------------------------------------------------|----|---------------------------------------------------------------------------------------------------------------------------------------|-------------|-------------|-------------|--------------|-------------|-------------|
| TSS200 | ADHFE1  | 8  | 67344553/6734464<br>0/67344556/673445<br>88/67344642/67344<br>665                                             | 6  | cg01588438/cg08090<br>772/cg09383816/cg1<br>8065361/cg19283840<br>/cg20295442                                                         | 0.237875042 | 0.386282476 | 0.615113493 | 0.377238451  | 6.18E-10    | 1.54E-08    |
| TSS200 | ADORA2A | 22 | 24823389/2482351<br>9/24823455/248235<br>14/24823509                                                          | 5  | cg01373166/cg02237<br>342/cg08025954/cg2<br>0660269/cg23763137                                                                        | 0.587043485 | 0.485027076 | 0.390485036 | -0.196558449 | 1.45E-10    | 5.04E-09    |
| TSS200 | ADRA1A  | 8  | 26722965/2672293<br>3                                                                                         | 2  | cg20303399/cg23008<br>606                                                                                                             | 0.388836703 | 0.4551341   | 0.605570534 | 0.216733832  | 3.76E-07    | 3.52E-06    |
| TSS200 | ADRA1B  | 5  | 159343549                                                                                                     | 1  | cg070111172                                                                                                                           | 0.110053362 | 0.153461401 | 0.276518966 | 0.166465604  | 0.00139416  | 0.005606863 |
| TSS200 | AEBP1   | 7  | 44143774                                                                                                      | 1  | cg25289803                                                                                                                            | 0.126515985 | 0.170135441 | 0.327045437 | 0.200529453  | 0.000517164 | 0.002278613 |
| TSS200 | AGPAT3  | 21 | 45345152                                                                                                      | 1  | cg01331461                                                                                                                            | 0.49130884  | 0.400000961 | 0.326541441 | -0.164767399 | 3.77E-11    | 1.96E-09    |
| TSS200 | AGR2    | 7  | 16844852                                                                                                      | 1  | cg24426405                                                                                                                            | 0.405596495 | 0.303695883 | 0.218098841 | -0.187497654 | 1.08E-12    | 2.27E-10    |
| TSS200 | AGR3    | 7  | 16921699                                                                                                      | 1  | cg11039314                                                                                                                            | 0.582580955 | 0.449586267 | 0.334640868 | -0.247940087 | 1.10E-11    | 9.04E-10    |
| TSS200 | AGXT2   | 5  | 35048098                                                                                                      | 1  | cg09414557                                                                                                                            | 0.57072187  | 0.470930911 | 0.391149277 | -0.179572593 | 2.38E-12    | 3.81E-10    |
| TSS200 | AHSP    | 16 | 31539169                                                                                                      | 1  | cg05772125                                                                                                                            | 0.338102345 | 0.220724994 | 0.172116405 | -0.16598594  | 1.59E-10    | 5.39E-09    |
| TSS200 | AK5     | 1  | 77748190/7774813<br>6/77748221/777481<br>29                                                                   | 4  | cg02099814/cg17014<br>953/cg17445007/cg2<br>6466094                                                                                   | 0.207252802 | 0.290472878 | 0.405999654 | 0.198746852  | 3.91E-05    | 0.000222571 |
| TSS200 | AKR1B1  | 7  | 134144055/134143<br>971/134144062/134<br>143988/134143919/<br>134143991/134143<br>906/134144036               | 8  | cg02215070/cg06864<br>853/cg09957386/cg1<br>0795359/cg13801416<br>/cg14629509/cg1613<br>2520/cg21079345                               | 0.120978536 | 0.255759676 | 0.346781128 | 0.225802593  | 0.000542382 | 0.002372487 |
| TSS200 | ALB     | 4  | 74269908                                                                                                      | 1  | cg02951062                                                                                                                            | 0.58224563  | 0.543654539 | 0.396507564 | -0.185738066 | 5.53E-09    | 9.23E-08    |
| TSS200 | ALDH3A1 | 17 | 19648972/1964892<br>5/19648855/196488<br>53/19649051/19649<br>004/19648970/1964<br>8846/19651881/196<br>51940 | 10 | cg01471036/cg05447<br>343/cg06390079/cg1<br>1475454/cg12787571<br>/cg15849060/cg1895<br>7070/cg23098051/cg<br>25145360/cg2732937<br>1 | 0.500738424 | 0.407594416 | 0.33568294  | -0.165055484 | 4.20E-10    | 1.14E-08    |
| TSS200 | ALK     | 2  | 30144623/3014454<br>7/30144579/301445<br>66                                                                   | 4  | cg12740757/cg13552<br>710/cg14163665/cg2<br>5999722                                                                                   | 0.104995013 | 0.186948581 | 0.333230032 | 0.228235019  | 0.000326756 | 0.001505349 |
| TSS200 | ALOX12B | 17 | 7991103/7991169                                                                                               | 2  | cg06835483/cg22299<br>191                                                                                                             | 0.48868159  | 0.387138611 | 0.328515698 | -0.160165892 | 9.23E-13    | 2.12E-10    |
| TSS200 | ALPI    | 2  | 233320796/233320<br>760                                                                                       | 2  | cg04519870/cg25752<br>514                                                                                                             | 0.46623903  | 0.384597222 | 0.309468395 | -0.156770635 | 4.58E-11    | 2.23E-09    |
| TSS200 | ALPP    | 2  | 233243204                                                                                                     | 1  | cg09760618                                                                                                                            | 0.779325595 | 0.664133383 | 0.580322668 | -0.199002927 | 9.47E-09    | 1.45E-07    |

|        |          |    |                                                                         |   |                                                                                         |             |             |             |              |             |             |
|--------|----------|----|-------------------------------------------------------------------------|---|-----------------------------------------------------------------------------------------|-------------|-------------|-------------|--------------|-------------|-------------|
| TSS200 | ALX4     | 11 | 44331905                                                                | 1 | cg23089549                                                                              | 0.18546659  | 0.238488311 | 0.405366405 | 0.219899815  | 0.000200742 | 0.0009731   |
| TSS200 | AMBN     | 4  | 71457838/71457880                                                       | 2 | cg13523386/cg14322040                                                                   | 0.676795818 | 0.527071361 | 0.402634502 | -0.274161315 | 1.90E-11    | 1.27E-09    |
| TSS200 | AMICA1   | 11 | 118084192                                                               | 1 | cg12789173                                                                              | 0.584538275 | 0.4417041   | 0.365294977 | -0.219243298 | 1.26E-11    | 9.91E-10    |
| TSS200 | AMN      | 14 | 103388797/103388859/103388958                                           | 3 | cg01759155/cg07378067/cg19659004                                                        | 0.541512168 | 0.459527272 | 0.390072893 | -0.151439274 | 1.55E-10    | 5.32E-09    |
| TSS200 | AMPD1    | 1  | 115238213                                                               | 1 | cg05499890                                                                              | 0.432405895 | 0.362587672 | 0.279111518 | -0.153294377 | 4.57E-10    | 1.21E-08    |
| TSS200 | ANGPTL1  | 1  | 178840298                                                               | 1 | cg05630800                                                                              | 0.52292468  | 0.413086789 | 0.3627692   | -0.16015548  | 4.67E-09    | 8.09E-08    |
| TSS200 | ANGPTL2  | 9  | 129885080                                                               | 1 | cg08076018                                                                              | 0.53873826  | 0.613055878 | 0.695600336 | 0.156862076  | 9.18E-11    | 3.64E-09    |
| TSS200 | ANKMY1   | 2  | 241497599/241497583/241497412/241497417/241497554/241497415             | 6 | cg13030331/cg13198503/cg13604246/cg15766075/cg20002504/cg23964682                       | 0.204200586 | 0.28514408  | 0.435984256 | 0.231783669  | 7.27E-05    | 0.000386794 |
| TSS200 | ANKRD20B | 2  | 95522902/95522896/95522876                                              | 3 | cg08721908/cg23363202/cg24524352                                                        | 0.401647363 | 0.509299233 | 0.619958921 | 0.218311558  | 1.93E-06    | 1.53E-05    |
| TSS200 | ANKRD22  | 10 | 90611855/90611911/90611782                                              | 3 | cg01561719/cg02538681/cg03249630                                                        | 0.495251923 | 0.368030807 | 0.29051432  | -0.204737604 | 2.57E-11    | 1.54E-09    |
| TSS200 | ANKRD24  | 19 | 4183268                                                                 | 1 | cg19489188                                                                              | 0.568420715 | 0.472839067 | 0.380032332 | -0.188388383 | 2.52E-10    | 7.58E-09    |
| TSS200 | ANKRD34B | 5  | 79866431/79866319/79866368/79866379                                     | 4 | cg03478969/cg14478163/cg21800232/cg25316339                                             | 0.213590115 | 0.2542383   | 0.3824274   | 0.168837285  | 0.000504962 | 0.002231085 |
| TSS200 | ANKRD34C | 15 | 79575048/79574993/79574964                                              | 3 | cg09103619/cg17337118/cg22101924                                                        | 0.15143175  | 0.225983466 | 0.357870463 | 0.206438713  | 7.01E-08    | 8.09E-07    |
| TSS200 | ANKS4B   | 16 | 21244898/21244915                                                       | 2 | cg08030625/cg09752011                                                                   | 0.529291903 | 0.396084606 | 0.303389507 | -0.225902396 | 4.51E-11    | 2.21E-09    |
| TSS200 | ANO2     | 12 | 6055430                                                                 | 1 | cg00282706                                                                              | 0.428246835 | 0.295469    | 0.178942335 | -0.2493045   | 3.37E-11    | 1.83E-09    |
| TSS200 | ANO5     | 11 | 22214554/22214565/22214683                                              | 3 | cg09968630/cg13205384/cg20634738                                                        | 0.110190664 | 0.156672659 | 0.299666489 | 0.189475825  | 0.006729151 | 0.022958023 |
| TSS200 | APBB1IP  | 10 | 26727173/26727261/26727069/26727246/26727195                            | 5 | cg06157318/cg06535993/cg14022711/cg26241806/cg27303981                                  | 0.237127988 | 0.399557535 | 0.505817762 | 0.268689774  | 4.45E-08    | 5.44E-07    |
| TSS200 | APBB2    | 4  | 41216800/40859280/40859259/40859249/40859293/41216812/40859251/40859344 | 8 | cg01954188/cg02379560/cg04917391/cg05894734/cg06485940/cg09616640/cg16364495/cg26244738 | 0.280931146 | 0.416313494 | 0.497835854 | 0.216904708  | 3.54E-09    | 6.43E-08    |

|        |           |    |                                                                            |   |                                                                                              |             |             |             |              |          |             |
|--------|-----------|----|----------------------------------------------------------------------------|---|----------------------------------------------------------------------------------------------|-------------|-------------|-------------|--------------|----------|-------------|
| TSS200 | APCDD1L   | 20 | 57090015/5709009<br>0/57090104/570899<br>61/57090013/57090<br>122/57089953 | 7 | cg07402669/cg10354<br>244/cg13552201/cg1<br>3778709/cg20600210<br>/cg23487201/cg2411<br>5032 | 0.42089102  | 0.487043289 | 0.629301859 | 0.208410839  | 1.74E-09 | 3.51E-08    |
| TSS200 | APOBEC1   | 12 | 7818635/7818654/7<br>818585                                                | 3 | cg11304383/cg17187<br>764/cg20597842                                                         | 0.513610838 | 0.401134222 | 0.313431189 | -0.200179649 | 6.31E-11 | 2.82E-09    |
| TSS200 | APOBEC4   | 1  | 183622470                                                                  | 1 | cg19264170                                                                                   | 0.434361075 | 0.331664567 | 0.245767905 | -0.18859317  | 7.94E-12 | 7.10E-10    |
| TSS200 | ARHGAP20  | 11 | 110583649/110583<br>549/110583543/110<br>583590/110583599                  | 5 | cg03532274/cg04974<br>587/cg13643376/cg1<br>4652031/cg26135012                               | 0.122905577 | 0.209620451 | 0.32270661  | 0.199801033  | 4.08E-05 | 0.00023138  |
| TSS200 | ARHGEF10L | 1  | 17907024                                                                   | 1 | cg09854011                                                                                   | 0.509748005 | 0.385387567 | 0.317621118 | -0.192126887 | 1.88E-11 | 1.27E-09    |
| TSS200 | ARMC3     | 10 | 23216847/2321684<br>3/23216841                                             | 3 | cg06560760/cg08839<br>858/cg19523082                                                         | 0.156176652 | 0.256517689 | 0.475421363 | 0.319244711  | 3.92E-07 | 3.65E-06    |
| TSS200 | ARMS2     | 10 | 124214151/124214<br>120                                                    | 2 | cg13265583/cg24296<br>920                                                                    | 0.70374238  | 0.600907469 | 0.474264136 | -0.229478244 | 7.13E-10 | 1.72E-08    |
| TSS200 | ARRDC5    | 19 | 4902899/4902950                                                            | 2 | cg04946561/cg25539<br>255                                                                    | 0.666320735 | 0.566748817 | 0.475369577 | -0.190951158 | 5.52E-08 | 6.55E-07    |
| TSS200 | ART1      | 11 | 3666271/3666278                                                            | 2 | cg03245218/cg11173<br>076                                                                    | 0.530438475 | 0.416615628 | 0.328015677 | -0.202422798 | 8.31E-10 | 1.95E-08    |
| TSS200 | ASB10     | 7  | 150884979/150885<br>084/150885027/150<br>884641/150885103/<br>150884486    | 6 | cg04671739/cg05181<br>846/cg10980293/cg1<br>3594957/cg13645954<br>/cg25786651                | 0.589422239 | 0.493514747 | 0.390472201 | -0.198950038 | 4.53E-12 | 5.18E-10    |
| TSS200 | ASB4      | 7  | 95115232/9511524<br>6/95115194/951151<br>63                                | 4 | cg19100779/cg20040<br>691/cg21787063/cg2<br>5692621                                          | 0.514547569 | 0.418078465 | 0.326832825 | -0.187714744 | 3.67E-10 | 1.02E-08    |
| TSS200 | ASGR1     | 17 | 7083064/7083015                                                            | 2 | cg05331340/cg14018<br>648                                                                    | 0.606701045 | 0.49076275  | 0.369823423 | -0.236877622 | 7.37E-12 | 6.96E-10    |
| TSS200 | ATCAY     | 19 | 3880535/3880606/3<br>880544                                                | 3 | cg12443227/cg17818<br>344/cg22796572                                                         | 0.203428111 | 0.25685613  | 0.354777461 | 0.15134935   | 6.30E-06 | 4.36E-05    |
| TSS200 | ATG9B     | 7  | 150721650                                                                  | 1 | cg12229082                                                                                   | 0.4947485   | 0.406135444 | 0.319899555 | -0.174848945 | 1.30E-09 | 2.75E-08    |
| TSS200 | ATP10A    | 15 | 26108391/2610839<br>9/26108401/261084<br>10/26108412                       | 5 | cg03419058/cg16389<br>285/cg20124450/cg2<br>2113930/cg26230285                               | 0.184105866 | 0.276954253 | 0.400864824 | 0.216758958  | 1.43E-07 | 1.49E-06    |
| TSS200 | ATP4B     | 13 | 114312577/114312<br>686/114312617/114<br>312504/114312624                  | 5 | cg01064131/cg01233<br>487/cg01957900/cg0<br>9556939/cg12795643                               | 0.726451575 | 0.649913061 | 0.569038273 | -0.157413302 | 2.24E-05 | 0.000135346 |
| TSS200 | ATP6V1G3  | 1  | 198510253                                                                  | 1 | cg13100753                                                                                   | 0.665884585 | 0.526101967 | 0.395414614 | -0.270469971 | 6.64E-12 | 6.35E-10    |

|        |          |    |                                                                       |   |                                                                              |             |             |             |              |             |            |
|--------|----------|----|-----------------------------------------------------------------------|---|------------------------------------------------------------------------------|-------------|-------------|-------------|--------------|-------------|------------|
| TSS200 | AZU1     | 19 | 827715/827776/827739/827821                                           | 4 | cg02147126/cg10752406/cg14663914/cg15610437                                  | 0.416693988 | 0.330244007 | 0.26463662  | -0.152057367 | 1.71E-11    | 1.20E-09   |
| TSS200 | B3GALNT1 | 3  | 160823318/160823255/160823231/160823315/160822728/160822711/160822720 | 7 | cg00160619/cg12716838/cg13072057/cg13279566/cg16496687/cg25469234/cg25635352 | 0.183049295 | 0.279005064 | 0.358239667 | 0.175190372  | 0.001648859 | 0.00653124 |
| TSS200 | BAALC    | 8  | 104152750/104152754                                                   | 2 | cg10163483/cg14284952                                                        | 0.24627411  | 0.358346559 | 0.546722218 | 0.300448108  | 1.02E-06    | 8.68E-06   |
| TSS200 | BAIAP2L2 | 22 | 38506737/38506781/38506771/38506712                                   | 4 | cg08196512/cg09247692/cg11744966/cg20207973                                  | 0.553262019 | 0.446624538 | 0.352571103 | -0.200690915 | 3.88E-10    | 1.07E-08   |
| TSS200 | BARHL2   | 1  | 91182989/91182856                                                     | 2 | cg00010742/cg17241310                                                        | 0.319597535 | 0.354711339 | 0.507436764 | 0.187839229  | 4.28E-06    | 3.09E-05   |
| TSS200 | BASE     | 20 | 31781277/31781232/31781393/31781333                                   | 4 | cg01923514/cg11274778/cg20539474/cg24866792                                  | 0.556454206 | 0.480108329 | 0.384046014 | -0.172408193 | 1.13E-10    | 4.23E-09   |
| TSS200 | BBOX1    | 11 | 27062416                                                              | 1 | cg20910746                                                                   | 0.64548082  | 0.501748578 | 0.399057405 | -0.246423415 | 9.78E-10    | 2.21E-08   |
| TSS200 | BCAS1    | 20 | 52687394/52687365                                                     | 2 | cg08927738/cg23682609                                                        | 0.47305303  | 0.364033217 | 0.285960409 | -0.187092621 | 8.95E-12    | 7.77E-10   |
| TSS200 | BCL2L14  | 12 | 12224246/12223841                                                     | 2 | cg01175610/cg18223430                                                        | 0.33042476  | 0.211356972 | 0.15726861  | -0.17315615  | 7.85E-09    | 1.24E-07   |
| TSS200 | BCL2L15  | 1  | 114430280                                                             | 1 | cg13991834                                                                   | 0.387349145 | 0.248221828 | 0.196603304 | -0.190745841 | 1.96E-10    | 6.34E-09   |
| TSS200 | BEND4    | 4  | 42154927/42154977/42154934/42154983/42154912/42154949                 | 6 | cg03167389/cg07033093/cg18144906/cg19009280/cg23951961/cg27450499            | 0.182139365 | 0.251943134 | 0.385098053 | 0.202958689  | 1.98E-07    | 1.98E-06   |
| TSS200 | BEST2    | 19 | 12863295                                                              | 1 | cg16554020                                                                   | 0.76392972  | 0.63914735  | 0.497493332 | -0.266436388 | 1.96E-09    | 3.86E-08   |
| TSS200 | BEST3    | 12 | 70083213/70083096/70093350/70083193/70083105/70083090                 | 6 | cg03196364/cg05493841/cg07618900/cg07911961/cg14834675/cg22610980            | 0.342816921 | 0.261395022 | 0.174915573 | -0.167901349 | 4.41E-09    | 7.74E-08   |
| TSS200 | BET3L    | 6  | 116866784                                                             | 1 | cg12262781                                                                   | 0.524387955 | 0.435040828 | 0.317179432 | -0.207208523 | 5.97E-08    | 7.01E-07   |
| TSS200 | BHLHE23  | 20 | 61638488/61638420/61638518/61638433/61638501/61638574                 | 6 | cg01699217/cg06550340/cg14060496/cg14373923/cg23806621/cg26492446            | 0.280085534 | 0.394567118 | 0.514069551 | 0.233984017  | 1.29E-09    | 2.74E-08   |
| TSS200 | BOLL     | 2  | 198650208/198650985/198651076/198650123/198650987/198650112           | 6 | cg03433510/cg05783139/cg07495363/cg10547527/cg13356896/cg21300403            | 0.603959952 | 0.659385432 | 0.773824135 | 0.169864183  | 5.09E-09    | 8.64E-08   |
| TSS200 | BPIL1    | 20 | 31595346/31595360                                                     | 2 | cg10968815/cg13696012                                                        | 0.74723877  | 0.610260339 | 0.45784017  | -0.2893986   | 1.50E-12    | 2.65E-10   |

|        |          |    |                                                             |   |                                                                   |             |             |             |              |          |             |
|--------|----------|----|-------------------------------------------------------------|---|-------------------------------------------------------------------|-------------|-------------|-------------|--------------|----------|-------------|
| TSS200 | BPIL3    | 20 | 31619420                                                    | 1 | cg25345102                                                        | 0.68629173  | 0.526548167 | 0.469432586 | -0.216859144 | 7.17E-08 | 8.25E-07    |
| TSS200 | BSX      | 11 | 122852454/122852523/122852429/122852412/122852417/122852461 | 6 | cg02078690/cg02159381/cg02179652/cg04092231/cg11141380/cg27314569 | 0.353419475 | 0.420348966 | 0.586804642 | 0.233385167  | 1.22E-09 | 2.64E-08    |
| TSS200 | BTF3L1   | 13 | 77502558                                                    | 1 | cg18990874                                                        | 0.636846275 | 0.487598311 | 0.387678309 | -0.249167966 | 4.93E-11 | 2.38E-09    |
| TSS200 | BTNL2    | 6  | 32374926/32374956                                           | 2 | cg09748960/cg10254167                                             | 0.509486675 | 0.392747239 | 0.30567807  | -0.203808605 | 2.53E-11 | 1.54E-09    |
| TSS200 | BTNL8    | 5  | 180325954/180325969/180336487                               | 3 | cg05624226/cg10906849/cg17826428                                  | 0.515427543 | 0.402136906 | 0.316388893 | -0.199038649 | 7.18E-11 | 3.12E-09    |
| TSS200 | BZRAP1   | 17 | 56406294                                                    | 1 | cg12117658                                                        | 0.3768359   | 0.250601428 | 0.146685415 | -0.230150485 | 1.15E-10 | 4.24E-09    |
| TSS200 | C10orf72 | 10 | 50323706/50323708                                           | 2 | cg06365057/cg24139737                                             | 0.300202745 | 0.372589422 | 0.477602068 | 0.177399323  | 6.27E-10 | 1.56E-08    |
| TSS200 | C10orf81 | 10 | 115511135/115511153                                         | 2 | cg10627429/cg11204562                                             | 0.534802678 | 0.430468611 | 0.345354982 | -0.189447696 | 5.76E-11 | 2.67E-09    |
| TSS200 | C10orf88 | 10 | 124714041/124714047/124714098/124714072/124713989           | 5 | cg02463329/cg05596319/cg18565342/cg25222014/cg26956371            | 0.134768884 | 0.197947641 | 0.307683149 | 0.172914265  | 8.20E-05 | 0.00043299  |
| TSS200 | C10orf90 | 10 | 128210076/128210036                                         | 2 | cg09621603/cg10005270                                             | 0.60503916  | 0.431178194 | 0.292599823 | -0.312439337 | 7.21E-15 | 1.49E-11    |
| TSS200 | C11orf52 | 11 | 111789493/111789452                                         | 2 | cg08775230/cg23921031                                             | 0.478575773 | 0.382350964 | 0.293517739 | -0.185058034 | 5.24E-10 | 1.36E-08    |
| TSS200 | C11orf87 | 11 | 109292803/109292809/109292789                               | 3 | cg11473876/cg16359550/cg27471124                                  | 0.343952475 | 0.433410228 | 0.584383979 | 0.240431504  | 1.75E-08 | 2.41E-07    |
| TSS200 | C11orf88 | 11 | 111385357/111385496/111385338/111385450/111385461           | 5 | cg03629499/cg05216730/cg08533783/cg20606490/cg25782847            | 0.145538933 | 0.176178693 | 0.316088397 | 0.170549464  | 2.69E-05 | 0.000159144 |
| TSS200 | C11orf94 | 11 | 45928848/45928937/45928988/45928854/45928841/45928898       | 6 | cg01972688/cg02164088/cg03135577/cg05223459/cg12019650/cg25518365 | 0.619191618 | 0.488567313 | 0.413108785 | -0.206082833 | 7.66E-13 | 1.98E-10    |
| TSS200 | C12orf42 | 12 | 103889798/103889903/103889784/103889789/103889928/103889772 | 6 | cg03882242/cg06664258/cg11342468/cg13702005/cg14380586/cg26381364 | 0.238222217 | 0.411233297 | 0.54528253  | 0.307060312  | 1.92E-10 | 6.19E-09    |
| TSS200 | C12orf56 | 12 | 64784498/64784483                                           | 2 | cg13867865/cg15731056                                             | 0.208991981 | 0.256064203 | 0.47905462  | 0.27006264   | 1.60E-06 | 1.29E-05    |
| TSS200 | C12orf74 | 12 | 93096780/93096819/93096811                                  | 3 | cg12755471/cg26383838/cg27576271                                  | 0.473736345 | 0.391258385 | 0.304769186 | -0.168967159 | 1.57E-10 | 5.36E-09    |



|        |           |    |                                                             |   |                                                                   |             |             |             |              |             |             |
|--------|-----------|----|-------------------------------------------------------------|---|-------------------------------------------------------------------|-------------|-------------|-------------|--------------|-------------|-------------|
| TSS200 | C13orf16  | 13 | 111972854/111972919/111972997/111972898/111972954/111972886 | 6 | cg04752989/cg15511286/cg16384137/cg21308062/cg22102391/cg26299239 | 0.769141245 | 0.698106115 | 0.568651548 | -0.200489697 | 3.84E-09    | 6.86E-08    |
| TSS200 | C13orf30  | 13 | 43355514                                                    | 1 | cg24818699                                                        | 0.725343805 | 0.683871289 | 0.530825736 | -0.194518069 | 2.91E-05    | 0.000170524 |
| TSS200 | C13orf38  | 13 | 36872166/36872048/36872155/36872135/36872148/36872086       | 6 | cg05927742/cg11678027/cg19437258/cg19801062/cg23003720/cg23710498 | 0.205579832 | 0.286229888 | 0.37322158  | 0.167641748  | 2.18E-05    | 0.000132579 |
| TSS200 | C14orf177 | 14 | 99177777                                                    | 1 | cg06906435                                                        | 0.632554745 | 0.557396089 | 0.363526641 | -0.269028104 | 1.02E-07    | 1.12E-06    |
| TSS200 | C14orf39  | 14 | 60952945/60952933/60952781                                  | 3 | cg12189551/cg26132298/cg26248878                                  | 0.279060523 | 0.386990292 | 0.543512184 | 0.264451662  | 2.27E-06    | 1.77E-05    |
| TSS200 | C14orf48  | 14 | 94463488                                                    | 1 | cg16506185                                                        | 0.69540914  | 0.529832594 | 0.4340211   | -0.26138804  | 6.47E-09    | 1.05E-07    |
| TSS200 | C15orf63  | 15 | 44092488/44092606                                           | 2 | cg02394812/cg24125648                                             | 0.4792219   | 0.410348928 | 0.307880623 | -0.171341277 | 2.37E-08    | 3.17E-07    |
| TSS200 | C16orf73  | 16 | 1922370/1922149/1922155/1922216/1922207                     | 5 | cg03467725/cg05041351/cg07775371/cg08959396/cg27308021            | 0.155952418 | 0.191239859 | 0.348454698 | 0.19250228   | 5.85E-06    | 4.08E-05    |
| TSS200 | C16orf78  | 16 | 49407794                                                    | 1 | cg14933439                                                        | 0.603215615 | 0.497054906 | 0.408461659 | -0.194753956 | 4.56E-09    | 7.96E-08    |
| TSS200 | C16orf82  | 16 | 27078053                                                    | 1 | cg17306401                                                        | 0.458099185 | 0.350210861 | 0.270635577 | -0.187463608 | 8.14E-13    | 2.04E-10    |
| TSS200 | C17orf102 | 17 | 32906456/32906454/32906394                                  | 3 | cg04906989/cg08967802/cg09628838                                  | 0.102800783 | 0.123376076 | 0.260820184 | 0.158019402  | 0.000819832 | 0.003459442 |
| TSS200 | C17orf104 | 17 | 42733698/42733724/42733729/42733592/42733662/42733600       | 6 | cg02932314/cg12127472/cg12781700/cg12892303/cg15000379/cg17269633 | 0.327629685 | 0.414478568 | 0.574156066 | 0.246526381  | 6.40E-08    | 7.48E-07    |
| TSS200 | C17orf46  | 17 | 43339512/43339497/43339515/43339589/43339594                | 5 | cg01627847/cg03048083/cg08124910/cg24542751/cg26742995            | 0.102473477 | 0.223282182 | 0.347194491 | 0.244721014  | 0.000126967 | 0.000644812 |
| TSS200 | C17orf54  | 17 | 71824806                                                    | 1 | cg19786648                                                        | 0.688294275 | 0.571451172 | 0.477503564 | -0.210790711 | 2.49E-09    | 4.71E-08    |
| TSS200 | C17orf66  | 17 | 34195902/34196023                                           | 2 | cg16030510/cg24092442                                             | 0.763559448 | 0.675188539 | 0.553623868 | -0.209935579 | 1.13E-07    | 1.23E-06    |
| TSS200 | C17orf73  | 17 | 48845064/48845052/48845009                                  | 3 | cg07443932/cg12235260/cg25518968                                  | 0.729788185 | 0.563210294 | 0.471729965 | -0.25805822  | 1.78E-11    | 1.22E-09    |
| TSS200 | C17orf74  | 17 | 7328814/7328921/7328734                                     | 3 | cg02173388/cg13155863/cg25627098                                  | 0.616287973 | 0.52635305  | 0.43421705  | -0.182070923 | 2.16E-08    | 2.93E-07    |
| TSS200 | C18orf34  | 18 | 31020754/31020806                                           | 2 | cg00625334/cg05994094                                             | 0.264556073 | 0.34116821  | 0.511657836 | 0.247101764  | 4.57E-07    | 4.19E-06    |
| TSS200 | C19orf21  | 19 | 751098/751124                                               | 2 | cg03018001/cg03230858                                             | 0.491678995 | 0.409519864 | 0.3357804   | -0.155898595 | 2.72E-10    | 8.08E-09    |

|        |           |    |                                                             |   |                                                                   |             |             |             |              |          |             |
|--------|-----------|----|-------------------------------------------------------------|---|-------------------------------------------------------------------|-------------|-------------|-------------|--------------|----------|-------------|
| TSS200 | C1orf110  | 1  | 162838743/162838649                                         | 2 | cg01450736/cg20511534                                             | 0.7294112   | 0.590675372 | 0.451808127 | -0.277603073 | 5.54E-13 | 1.75E-10    |
| TSS200 | C1orf114  | 1  | 169396706/169396858/169396712/169396834/169396785/169396868 | 6 | cg00002719/cg08047907/cg08104202/cg16998150/cg23818870/cg24808280 | 0.207405182 | 0.32520246  | 0.443909426 | 0.236504245  | 8.03E-06 | 5.41E-05    |
| TSS200 | C1orf129  | 1  | 170904596                                                   | 1 | cg08663653                                                        | 0.72147691  | 0.675346506 | 0.558396341 | -0.163080569 | 1.63E-05 | 0.000102144 |
| TSS200 | C1orf14   | 1  | 182922705/182922593/182922582                               | 3 | cg02721693/cg02925590/cg22237670                                  | 0.43660276  | 0.284083983 | 0.213868618 | -0.222734142 | 2.51E-11 | 1.54E-09    |
| TSS200 | C1orf150  | 1  | 247712377/247712383                                         | 2 | cg12769118/cg17518550                                             | 0.461933712 | 0.336924981 | 0.23501434  | -0.226919371 | 3.55E-07 | 3.35E-06    |
| TSS200 | C1orf173  | 1  | 75139583/75139490/75139482/75139470/75139581                | 5 | cg13341453/cg15386773/cg19695945/cg22427475/cg27268184            | 0.321432568 | 0.428771639 | 0.554361991 | 0.232929423  | 3.34E-08 | 4.24E-07    |
| TSS200 | C1orf180  | 1  | 85100819                                                    | 1 | cg00062020                                                        | 0.72743088  | 0.514032939 | 0.472090786 | -0.255340094 | 8.75E-10 | 2.03E-08    |
| TSS200 | C1orf210  | 1  | 43751370/43751270/43751469/43751363/43751376                | 5 | cg00500789/cg04289036/cg09462269/cg12752420/cg23800435            | 0.528542293 | 0.450714807 | 0.366218498 | -0.162323795 | 2.40E-08 | 3.19E-07    |
| TSS200 | C1orf226  | 1  | 162351367                                                   | 1 | cg19678111                                                        | 0.412865015 | 0.301160994 | 0.238033195 | -0.17483182  | 1.52E-11 | 1.12E-09    |
| TSS200 | C1orf64   | 1  | 16330625                                                    | 1 | cg16510654                                                        | 0.631408815 | 0.509595917 | 0.39826415  | -0.233144665 | 5.54E-12 | 5.68E-10    |
| TSS200 | C1orf70   | 1  | 1475742                                                     | 1 | cg15487867                                                        | 0.078401843 | 0.225160943 | 0.516900801 | 0.438498958  | 6.79E-10 | 1.65E-08    |
| TSS200 | C1QL2     | 2  | 119916510/119916571/119916662/119916581/119916486           | 5 | cg07212778/cg15931721/cg16849609/cg17319142/cg21858380            | 0.283311327 | 0.397913469 | 0.549646376 | 0.266335049  | 1.52E-08 | 2.15E-07    |
| TSS200 | C1QTNF8   | 16 | 1146421/1146277                                             | 2 | cg02076607/cg14016390                                             | 0.693316705 | 0.615796867 | 0.5425053   | -0.150811405 | 3.36E-12 | 4.48E-10    |
| TSS200 | C1S       | 12 | 7167781/7167900                                             | 2 | cg15626285/cg24535475                                             | 0.512977363 | 0.395059083 | 0.297517975 | -0.215459388 | 5.21E-12 | 5.51E-10    |
| TSS200 | C20orf114 | 20 | 31870884/31870935/31870888/31870775                         | 4 | cg03033543/cg11035100/cg16762308/cg19378216                       | 0.466077545 | 0.370986143 | 0.291087513 | -0.174990032 | 3.80E-12 | 4.74E-10    |
| TSS200 | C20orf118 | 20 | 35504511/35504403/35504371/35504553                         | 4 | cg00414077/cg09227119/cg09241885/cg18062064                       | 0.481399744 | 0.381123068 | 0.317883556 | -0.163516188 | 6.16E-12 | 6.03E-10    |
| TSS200 | C20orf123 | 20 | 45179230/45179226/45179354/45179345                         | 4 | cg01700462/cg11173131/cg17775490/cg17801864                       | 0.512827775 | 0.456476589 | 0.348015814 | -0.164811961 | 6.97E-10 | 1.68E-08    |

|        |           |    |                                                                   |   |                                                                               |             |             |             |              |            |             |
|--------|-----------|----|-------------------------------------------------------------------|---|-------------------------------------------------------------------------------|-------------|-------------|-------------|--------------|------------|-------------|
| TSS200 | C20orf151 | 20 | 61002595/6100265<br>7/61002739/610027<br>11                       | 4 | cg02537838/cg06154<br>311/cg13290149/cg1<br>7565967                           | 0.509861393 | 0.415810674 | 0.339791998 | -0.170069395 | 3.46E-12   | 4.51E-10    |
| TSS200 | C20orf79  | 20 | 18794246/1879430<br>3                                             | 2 | cg11901715/cg27132<br>814                                                     | 0.547870935 | 0.397907622 | 0.291088214 | -0.256782721 | 2.81E-15   | 1.23E-11    |
| TSS200 | C21orf129 | 21 | 43135973/4313594<br>9                                             | 2 | cg01688776/cg26048<br>478                                                     | 0.49878362  | 0.405223106 | 0.322974966 | -0.175808654 | 1.91E-10   | 6.18E-09    |
| TSS200 | C21orf131 | 21 | 22175522                                                          | 1 | cg26977737                                                                    | 0.62175238  | 0.501565889 | 0.392280795 | -0.229471585 | 4.71E-08   | 5.70E-07    |
| TSS200 | C21orf34  | 21 | 17442663/1744280<br>3                                             | 2 | cg12166520/cg19422<br>019                                                     | 0.680448375 | 0.556397075 | 0.460319666 | -0.220128709 | 2.28E-09   | 4.37E-08    |
| TSS200 | C2orf40   | 2  | 106681983/106681<br>998/106681937/106<br>681945                   | 4 | cg06499647/cg07510<br>423/cg14535980/cg2<br>1838979                           | 0.366548016 | 0.394762189 | 0.533100355 | 0.166552338  | 1.40E-06   | 1.15E-05    |
| TSS200 | C2orf74   | 2  | 61372066/6137211<br>7/61372138/613721<br>65/61372058/61372<br>226 | 6 | cg01648237/cg05037<br>927/cg16328106/cg1<br>9790321/cg23405039<br>/cg24757310 | 0.38050331  | 0.560060123 | 0.670541623 | 0.290038313  | 8.57E-11   | 3.50E-09    |
| TSS200 | C3orf32   | 3  | 8693756/8693859/8<br>693749/8693781                               | 4 | cg01104466/cg02100<br>848/cg06610172/cg1<br>5770125                           | 0.461624165 | 0.372541911 | 0.307005748 | -0.154618417 | 8.94E-13   | 2.12E-10    |
| TSS200 | C3orf79   | 3  | 153202275                                                         | 1 | cg00731062                                                                    | 0.53057651  | 0.390812894 | 0.256475114 | -0.274101396 | 6.91E-15   | 1.49E-11    |
| TSS200 | C4BPA     | 1  | 207277547/207277<br>466/207277581/207<br>277450                   | 4 | cg14856606/cg22491<br>058/cg26430305/cg2<br>6514552                           | 0.40844033  | 0.313015825 | 0.240104755 | -0.168335575 | 4.49E-11   | 2.21E-09    |
| TSS200 | C4BPB     | 1  | 207262190/207262<br>428/207262553                                 | 3 | cg05659947/cg14740<br>771/cg21571160                                          | 0.490815382 | 0.389026433 | 0.299401971 | -0.19141341  | 5.95E-11   | 2.71E-09    |
| TSS200 | C4orf26   | 4  | 76481169                                                          | 1 | cg22960952                                                                    | 0.47216265  | 0.342518861 | 0.27130791  | -0.20085474  | 1.37E-09   | 2.86E-08    |
| TSS200 | C4orf47   | 4  | 186350505                                                         | 1 | cg18740810                                                                    | 0.627730495 | 0.531216306 | 0.377883173 | -0.249847322 | 1.51E-10   | 5.20E-09    |
| TSS200 | C6orf155  | 6  | 72130615/7213064<br>7/72130553/721305<br>47/72130539              | 5 | cg11574469/cg15832<br>847/cg22300282/cg2<br>3281154/cg26162616                | 0.43985552  | 0.532175863 | 0.633696194 | 0.193840674  | 3.41E-06   | 2.53E-05    |
| TSS200 | C6orf186  | 6  | 110679566                                                         | 1 | cg20737185                                                                    | 0.166152772 | 0.251012479 | 0.434007986 | 0.267855214  | 0.00019529 | 0.000949301 |
| TSS200 | C6orf222  | 6  | 36304794/3630468<br>3                                             | 2 | cg10550074/cg14673<br>936                                                     | 0.416463845 | 0.302862578 | 0.246320325 | -0.17014352  | 7.28E-11   | 3.14E-09    |
| TSS200 | C8orf12   | 8  | 11225875/1122583<br>2/11225793                                    | 3 | cg05445291/cg23282<br>442/cg24901707                                          | 0.631553115 | 0.574388472 | 0.455623005 | -0.17593011  | 7.24E-09   | 1.16E-07    |
| TSS200 | C8orf85   | 8  | 117950454/117950<br>335/117950348/117<br>950395                   | 4 | cg05591716/cg07064<br>711/cg07868721/cg0<br>8466968                           | 0.329963244 | 0.408788685 | 0.50094221  | 0.170978966  | 4.93E-08   | 5.94E-07    |

|        |          |    |                                                                         |   |                                                                                         |             |             |             |              |             |             |
|--------|----------|----|-------------------------------------------------------------------------|---|-----------------------------------------------------------------------------------------|-------------|-------------|-------------|--------------|-------------|-------------|
| TSS200 | C8ORFK29 | 8  | 145578603/145578687/145578601                                           | 3 | cg01836096/cg16808444/cg26137121                                                        | 0.697626427 | 0.607197796 | 0.524854617 | -0.17277181  | 3.73E-10    | 1.04E-08    |
| TSS200 | C9orf50  | 9  | 132383095                                                               | 1 | cg10640119                                                                              | 0.180273475 | 0.386498772 | 0.440187277 | 0.259913802  | 2.37E-10    | 7.19E-09    |
| TSS200 | CA10     | 17 | 50237205/50237401/50237403/50237576/50237267/50237315                   | 6 | cg07398767/cg08605326/cg13125157/cg20552747/cg22855255/cg25592977                       | 0.454836172 | 0.523712522 | 0.662433459 | 0.207597287  | 4.83E-09    | 8.31E-08    |
| TSS200 | CA3      | 8  | 86351018/86350913/86350919/8635089/86350927                             | 5 | cg08582356/cg09435929/cg10184889/cg17480760/cg21172458                                  | 0.378530393 | 0.507014574 | 0.618871927 | 0.240341534  | 1.10E-11    | 9.04E-10    |
| TSS200 | CA6      | 1  | 9005734/9005910                                                         | 2 | cg02981703/cg06962067                                                                   | 0.617088085 | 0.509553539 | 0.437271609 | -0.179816476 | 2.48E-08    | 3.28E-07    |
| TSS200 | CABP5    | 19 | 48547362/48547314/48547448                                              | 3 | cg05308117/cg10149529/cg18534730                                                        | 0.627265225 | 0.580844817 | 0.474680541 | -0.152584684 | 0.000143114 | 0.000718714 |
| TSS200 | CACNA1A  | 19 | 13617366/13617382                                                       | 2 | cg18011401/cg26554567                                                                   | 0.142978877 | 0.199515259 | 0.312378377 | 0.1693995    | 0.000553221 | 0.00241254  |
| TSS200 | CACNA1E  | 1  | 181452707/181452618                                                     | 2 | cg04902729/cg21378238                                                                   | 0.313242515 | 0.407576581 | 0.493559109 | 0.180316594  | 1.41E-08    | 2.02E-07    |
| TSS200 | CACNA1I  | 22 | 39966585/39966653/39966711                                              | 3 | cg03390717/cg11312108/cg18001869                                                        | 0.694599428 | 0.613027817 | 0.51746318  | -0.177136248 | 2.79E-07    | 2.70E-06    |
| TSS200 | CACNG8   | 19 | 54466187                                                                | 1 | cg23752563                                                                              | 0.33931252  | 0.383725244 | 0.608583723 | 0.269271203  | 3.54E-10    | 9.96E-09    |
| TSS200 | CALML4   | 15 | 68498589                                                                | 1 | cg08642285                                                                              | 0.37774085  | 0.264938189 | 0.217778586 | -0.159962264 | 3.64E-12    | 4.62E-10    |
| TSS200 | CAPG     | 2  | 85637834/85637851/85637739                                              | 3 | cg07215695/cg26476820/cg27139457                                                        | 0.4685858   | 0.380579343 | 0.307348302 | -0.161237498 | 1.63E-11    | 1.17E-09    |
| TSS200 | CAPN14   | 2  | 31440451                                                                | 1 | cg15741855                                                                              | 0.83436935  | 0.748225589 | 0.620555414 | -0.213813936 | 1.62E-06    | 1.31E-05    |
| TSS200 | CAPS     | 19 | 5914009/5914158                                                         | 2 | cg03908904/cg06713671                                                                   | 0.521864175 | 0.420033217 | 0.34569362  | -0.176170555 | 9.33E-11    | 3.69E-09    |
| TSS200 | CAPZA3   | 12 | 18890872                                                                | 1 | cg06233731                                                                              | 0.659154945 | 0.580735178 | 0.465161123 | -0.193993822 | 2.34E-07    | 2.31E-06    |
| TSS200 | CARD14   | 17 | 78161482/78152232/78152169/78161572/78161479/78161495/78152219/78161467 | 8 | cg03130276/cg03290213/cg06209035/cg11447922/cg15910686/cg20571913/cg20623503/cg24206431 | 0.540594582 | 0.432789598 | 0.345467708 | -0.195126874 | 2.52E-11    | 1.54E-09    |
| TSS200 | CARD6    | 5  | 40841298/40841315                                                       | 2 | cg01784614/cg05305046                                                                   | 0.55928784  | 0.493785244 | 0.384101791 | -0.175186049 | 4.62E-05    | 0.000258164 |
| TSS200 | CARTPT   | 5  | 71014792/71014820/71014900/71014918/71014857                            | 5 | cg02762440/cg08351336/cg20798152/cg22517388/cg26371061                                  | 0.422181271 | 0.494360633 | 0.590158493 | 0.167977222  | 1.28E-10    | 4.60E-09    |
| TSS200 | CASP14   | 19 | 15162971/15162821                                                       | 2 | cg15930041/cg23207876                                                                   | 0.710652855 | 0.603860717 | 0.538632355 | -0.1720205   | 8.03E-07    | 6.98E-06    |

|        |         |    |                                                                                       |   |                                                                                              |             |             |             |              |          |             |
|--------|---------|----|---------------------------------------------------------------------------------------|---|----------------------------------------------------------------------------------------------|-------------|-------------|-------------|--------------|----------|-------------|
| TSS200 | CBLN2   | 18 | 70211774/7021191<br>6/70211835                                                        | 3 | cg05928649/cg26966<br>630/cg27376271                                                         | 0.117289561 | 0.189560737 | 0.292354303 | 0.175064743  | 1.10E-05 | 7.13E-05    |
| TSS200 | CBLN4   | 20 | 54580133/5458017<br>5/54580070/545801<br>96                                           | 4 | cg00480389/cg06672<br>560/cg20779964/cg2<br>5993718                                          | 0.44991325  | 0.490613225 | 0.63081295  | 0.1808997    | 5.55E-10 | 1.42E-08    |
| TSS200 | CCBP2   | 3  | 42850848/4285094<br>1                                                                 | 2 | cg13742532/cg21474<br>351                                                                    | 0.732403503 | 0.630272103 | 0.566398802 | -0.1660047   | 2.90E-11 | 1.66E-09    |
| TSS200 | CCDC105 | 19 | 15121531/1512151<br>6/15121509/151213<br>85                                           | 4 | cg02489552/cg05923<br>226/cg09470638/cg1<br>8739061                                          | 0.571636803 | 0.632686991 | 0.751769962 | 0.180133159  | 3.98E-10 | 1.09E-08    |
| TSS200 | CCDC140 | 2  | 223162692/223162<br>797/223162800/223<br>162666                                       | 4 | cg01790894/cg10416<br>206/cg13767755/cg1<br>4093610                                          | 0.266659694 | 0.281424995 | 0.436827723 | 0.170168029  | 3.81E-05 | 0.000217567 |
| TSS200 | CCDC141 | 2  | 179749875                                                                             | 1 | cg24782949                                                                                   | 0.84185333  | 0.711108883 | 0.648219109 | -0.193634221 | 8.97E-06 | 5.98E-05    |
| TSS200 | CCDC162 | 6  | 109615419/109615<br>455                                                               | 2 | cg02774282/cg15411<br>840                                                                    | 0.509370615 | 0.404036675 | 0.311233316 | -0.198137299 | 8.96E-12 | 7.77E-10    |
| TSS200 | CCDC37  | 3  | 126113663/126113<br>658/126113682/126<br>113707/126113695/<br>126113743/126113<br>640 | 7 | cg01815671/cg09686<br>443/cg11229862/cg2<br>0312228/cg20952286<br>/cg21109744/cg2381<br>6347 | 0.296193755 | 0.326978721 | 0.5068705   | 0.210676745  | 3.09E-06 | 2.32E-05    |
| TSS200 | CCDC42  | 17 | 8648180/8648193/8<br>648175                                                           | 3 | cg15394558/cg19093<br>680/cg27513572                                                         | 0.706042672 | 0.554612809 | 0.448698632 | -0.25734404  | 3.84E-10 | 1.06E-08    |
| TSS200 | CCDC70  | 13 | 52436047                                                                              | 1 | cg11631011                                                                                   | 0.71729355  | 0.560230817 | 0.398430955 | -0.318862595 | 1.43E-10 | 4.99E-09    |
| TSS200 | CCDC8   | 19 | 46917061/4691701<br>8                                                                 | 2 | cg03576469/cg18653<br>451                                                                    | 0.416366145 | 0.515087372 | 0.651822661 | 0.235456516  | 3.61E-07 | 3.40E-06    |
| TSS200 | CCDC81  | 11 | 86085715/8608562<br>3/86085757/860856<br>94                                           | 4 | cg10395685/cg16404<br>106/cg18121003/cg1<br>8282849                                          | 0.327380417 | 0.444136939 | 0.489811833 | 0.162431417  | 1.96E-05 | 0.000120121 |
| TSS200 | CCK     | 3  | 42306524/4230646<br>7/42306580/423064<br>93                                           | 4 | cg03724463/cg05471<br>845/cg07871202/cg2<br>1821833                                          | 0.391473403 | 0.434901556 | 0.57534962  | 0.183876218  | 9.49E-06 | 6.27E-05    |
| TSS200 | CCL1    | 17 | 32690255/3269036<br>7/32690412                                                        | 3 | cg01387036/cg22186<br>223/cg26101277                                                         | 0.405112055 | 0.289678217 | 0.220513923 | -0.184598132 | 5.08E-13 | 1.67E-10    |
| TSS200 | CCL11   | 17 | 32612684/3261267<br>5                                                                 | 2 | cg05999628/cg24870<br>391                                                                    | 0.595159858 | 0.529180808 | 0.419075273 | -0.176084585 | 4.69E-07 | 4.28E-06    |
| TSS200 | CCL17   | 16 | 57438524                                                                              | 1 | cg07634706                                                                                   | 0.8068675   | 0.748396939 | 0.635426027 | -0.171444173 | 1.72E-06 | 1.39E-05    |
| TSS200 | CCL20   | 2  | 228678500                                                                             | 1 | cg08575688                                                                                   | 0.35453925  | 0.263878794 | 0.202312391 | -0.152226859 | 1.58E-09 | 3.24E-08    |
| TSS200 | CCL8    | 17 | 32646006                                                                              | 1 | cg06083483                                                                                   | 0.386547545 | 0.274091633 | 0.19501377  | -0.191533775 | 1.30E-10 | 4.61E-09    |
| TSS200 | CCT8L2  | 22 | 17073884                                                                              | 1 | cg01474260                                                                                   | 0.621185775 | 0.538517511 | 0.462010945 | -0.15917483  | 3.94E-11 | 2.01E-09    |
| TSS200 | CD1B    | 1  | 158301451                                                                             | 1 | cg02478603                                                                                   | 0.808618955 | 0.706624789 | 0.561706105 | -0.24691285  | 1.78E-07 | 1.81E-06    |

|        |          |    |                                                                         |   |                                                                               |             |             |             |              |             |             |
|--------|----------|----|-------------------------------------------------------------------------|---|-------------------------------------------------------------------------------|-------------|-------------|-------------|--------------|-------------|-------------|
| TSS200 | CD300C   | 17 | 72542430                                                                | 1 | cg05892213                                                                    | 0.68572244  | 0.565528433 | 0.514696636 | -0.171025804 | 8.75E-07    | 7.54E-06    |
| TSS200 | CD40     | 20 | 44746823/4474675<br>1/44746825/447469<br>02/44746767                    | 5 | cg06571407/cg11841<br>529/cg22232207/cg2<br>4575067/cg25239996                | 0.184764494 | 0.271162715 | 0.375573884 | 0.19080939   | 2.25E-07    | 2.23E-06    |
| TSS200 | CD53     | 1  | 111413643                                                               | 1 | cg16896205                                                                    | 0.455283065 | 0.375745128 | 0.300335959 | -0.154947106 | 6.12E-12    | 6.03E-10    |
| TSS200 | CD5L     | 1  | 157811724/157811<br>790                                                 | 2 | cg03761113/cg11139<br>878                                                     | 0.69022407  | 0.550894139 | 0.444928248 | -0.245295822 | 6.42E-09    | 1.04E-07    |
| TSS200 | CDH10    | 5  | 24644988/2464509<br>3/24645065/246450<br>24                             | 4 | cg02617312/cg05683<br>049/cg17030055/cg2<br>6161643                           | 0.200284973 | 0.257347642 | 0.414638753 | 0.21435378   | 4.72E-09    | 8.14E-08    |
| TSS200 | CDH13    | 16 | 82660450/8266046<br>4/82660434/826604<br>90/82660505                    | 5 | cg01396387/cg07301<br>944/cg08497530/cg0<br>8977371/cg09825093                | 0.279708551 | 0.336435058 | 0.447371988 | 0.167663437  | 0.000241333 | 0.001150069 |
| TSS200 | CDH18    | 5  | 19988368/1998836<br>6                                                   | 2 | cg16503924/cg18710<br>278                                                     | 0.371138315 | 0.453583656 | 0.615012223 | 0.243873908  | 2.79E-07    | 2.70E-06    |
| TSS200 | CDH19    | 18 | 64271341                                                                | 1 | cg16489926                                                                    | 0.75453834  | 0.579833833 | 0.40824685  | -0.34629149  | 8.75E-15    | 1.53E-11    |
| TSS200 | CDH2     | 18 | 25757555                                                                | 1 | cg06090660                                                                    | 0.197414205 | 0.281984406 | 0.417557636 | 0.220143431  | 9.04E-07    | 7.77E-06    |
| TSS200 | CDH26    | 20 | 58533421/5853344<br>3                                                   | 2 | cg14115220/cg20895<br>028                                                     | 0.568432953 | 0.466094806 | 0.394623234 | -0.173809718 | 2.78E-10    | 8.21E-09    |
| TSS200 | CDH8     | 16 | 62070184/6207008<br>6/62070234/620702<br>19/62070164/62070<br>072       | 6 | cg01718742/cg06831<br>576/cg07681938/cg1<br>0241484/cg27120816<br>/cg27444994 | 0.470606927 | 0.550407352 | 0.671704271 | 0.201097345  | 6.13E-11    | 2.77E-09    |
| TSS200 | CDO1     | 5  | 115152420/115152<br>492/115152494/115<br>152431/115152413/<br>115152485 | 6 | cg02792792/cg08516<br>516/cg11036833/cg1<br>4470895/cg16707405<br>/cg23180938 | 0.272915407 | 0.463583631 | 0.59145335  | 0.318537943  | 1.28E-09    | 2.73E-08    |
| TSS200 | CEACAM20 | 19 | 45033565/4503357<br>2/45033577                                          | 3 | cg10375597/cg13566<br>596/cg20248549                                          | 0.78058014  | 0.667718153 | 0.539153582 | -0.241426558 | 3.79E-08    | 4.76E-07    |
| TSS200 | CES3     | 16 | 66994947                                                                | 1 | cg26538442                                                                    | 0.434121805 | 0.347465911 | 0.283320995 | -0.15080081  | 5.04E-09    | 8.58E-08    |
| TSS200 | CES7     | 16 | 55909393                                                                | 1 | cg07105499                                                                    | 0.58377174  | 0.446478756 | 0.325313445 | -0.258458295 | 1.69E-13    | 8.86E-11    |
| TSS200 | CGA      | 6  | 87804962                                                                | 1 | cg12078738                                                                    | 0.473137805 | 0.3783482   | 0.279368259 | -0.193769546 | 5.84E-11    | 2.69E-09    |
| TSS200 | CHADL    | 22 | 41636941/4163708<br>0                                                   | 2 | cg19833679/cg22970<br>173                                                     | 0.689963155 | 0.594263394 | 0.527227418 | -0.162735737 | 3.76E-10    | 1.04E-08    |
| TSS200 | CHL1     | 3  | 238615/238611/238<br>618/238496                                         | 4 | cg07746943/cg08421<br>685/cg12065366/cg2<br>5482786                           | 0.32114382  | 0.329874344 | 0.537976477 | 0.216832657  | 5.80E-10    | 1.47E-08    |
| TSS200 | CHODL    | 21 | 19617021/1961714<br>5/19617138                                          | 3 | cg03886449/cg12743<br>978/cg18349138                                          | 0.372128911 | 0.424850881 | 0.526353994 | 0.154225083  | 7.52E-09    | 1.20E-07    |

|        |        |    |                                                                                                                                                     |    |                                                                                                                                                                 |             |             |             |              |            |             |
|--------|--------|----|-----------------------------------------------------------------------------------------------------------------------------------------------------|----|-----------------------------------------------------------------------------------------------------------------------------------------------------------------|-------------|-------------|-------------|--------------|------------|-------------|
| TSS200 | CHRM2  | 7  | 136553243/136553<br>327/136553882/136<br>553855/136553289/<br>136553778/136553<br>263/136553682/136<br>553822/136553868/<br>136553884/136553<br>728 | 12 | cg04748704/cg05680<br>531/cg07664198/cg0<br>8323651/cg09546907<br>/cg10454514/cg1740<br>5012/cg22471517/cg<br>23300659/cg2422881<br>9/cg24575234/cg256<br>32105 | 0.313548296 | 0.418235346 | 0.566806688 | 0.253258392  | 1.45E-11   | 1.10E-09    |
| TSS200 | CHRNA1 | 2  | 175629219/175629<br>267/175629224                                                                                                                   | 3  | cg15580167/cg18003<br>659/cg21552300                                                                                                                            | 0.70420214  | 0.591301586 | 0.46163307  | -0.24256907  | 1.56E-08   | 2.19E-07    |
| TSS200 | CHRNA6 | 8  | 42623786/4262373<br>0/42623718/426237<br>71/42623686                                                                                                | 5  | cg06523556/cg07157<br>107/cg20539142/cg2<br>7051318/cg27395654                                                                                                  | 0.412791175 | 0.268098944 | 0.183260991 | -0.229530184 | 3.77E-09   | 6.76E-08    |
| TSS200 | CHST10 | 2  | 101034279/101034<br>257/101034270                                                                                                                   | 3  | cg03853987/cg16882<br>226/cg19283506                                                                                                                            | 0.110492482 | 0.247492011 | 0.52275403  | 0.412261548  | 5.11E-07   | 4.64E-06    |
| TSS200 | CHST11 | 12 | 104850716/104850<br>718/104850759/104<br>850745/104850695/<br>104850767                                                                             | 6  | cg01583034/cg03313<br>212/cg04578997/cg0<br>5119480/cg12411093<br>/cg21548032                                                                                   | 0.077040666 | 0.127219009 | 0.235361951 | 0.158321285  | 0.00090975 | 0.003803248 |
| TSS200 | CIDEA  | 18 | 12254175/1225414<br>8/12254566/122545<br>51/12254173/12254<br>469/12254556/1225<br>4473/12254153/122<br>54452/12254241/12<br>254120                 | 12 | cg00851770/cg03245<br>632/cg05700339/cg0<br>7204280/cg12072560<br>/cg12395205/cg1672<br>7201/cg17991823/cg<br>18309817/cg2111477<br>3/cg21376774/cg269<br>74111 | 0.335076963 | 0.456629373 | 0.535275714 | 0.200198752  | 2.69E-06   | 2.05E-05    |
| TSS200 | CLCA1  | 1  | 86934365/8693432<br>5                                                                                                                               | 2  | cg09785991/cg22181<br>664                                                                                                                                       | 0.6135676   | 0.489503294 | 0.366309359 | -0.247258241 | 2.02E-10   | 6.49E-09    |
| TSS200 | CLDN10 | 13 | 96204870/9620485<br>6/96204917/962048<br>73/96204854/96204<br>860                                                                                   | 6  | cg04603730/cg06428<br>163/cg09469554/cg1<br>0305311/cg16232183<br>/cg16275739                                                                                   | 0.169117983 | 0.278977054 | 0.520358225 | 0.351240242  | 1.79E-10   | 5.82E-09    |
| TSS200 | CLDN22 | 4  | 184242105/184242<br>058                                                                                                                             | 2  | cg02882785/cg20141<br>229                                                                                                                                       | 0.59442529  | 0.499899233 | 0.39533327  | -0.19909202  | 4.28E-08   | 5.26E-07    |
| TSS200 | CLIP4  | 2  | 29338258/2933810<br>9/29338121/293381<br>13                                                                                                         | 4  | cg03135351/cg13257<br>636/cg23255835/cg2<br>3428985                                                                                                             | 0.354324741 | 0.520574639 | 0.639799002 | 0.285474262  | 1.32E-09   | 2.79E-08    |
| TSS200 | CLRN1  | 3  | 150690810                                                                                                                                           | 1  | cg06822943                                                                                                                                                      | 0.41950601  | 0.305310744 | 0.227068418 | -0.192437592 | 2.58E-10   | 7.73E-09    |

|        |         |    |                                                                           |                                                                               |                                                                |             |             |              |              |             |             |
|--------|---------|----|---------------------------------------------------------------------------|-------------------------------------------------------------------------------|----------------------------------------------------------------|-------------|-------------|--------------|--------------|-------------|-------------|
| TSS200 | CLVS2   | 6  | 123317411/123317<br>569/123317487/123 5<br>317473/123317408               | cg05009934/cg08194<br>879/cg10182317/cg1<br>5749870/cg18366209                | 0.337506568                                                    | 0.437158306 | 0.571718995 | 0.234212428  | 3.67E-09     | 6.61E-08    |             |
| TSS200 | CMTM2   | 16 | 66613334/6661322<br>0/66613278/666132<br>06/66613273/66613 6<br>266       | cg00049664/cg05546<br>863/cg06666025/cg0<br>7153665/cg09854734<br>/cg16626067 | 0.326302001                                                    | 0.389529445 | 0.592895287 | 0.266593286  | 2.79E-08     | 3.62E-07    |             |
| TSS200 | CMTM3   | 16 | 66638407/6663839<br>6/66638438/666384<br>12/66638433/66638 6<br>210       | cg06445928/cg08601<br>917/cg08682544/cg0<br>9233013/cg26560414<br>/cg26658728 | 0.109438043                                                    | 0.271262986 | 0.43647724  | 0.327039197  | 2.55E-07     | 2.51E-06    |             |
| TSS200 | CMYA5   | 5  | 78985489/7898558<br>8/78985495/789854<br>84/78985562/78985 6<br>592       | cg03546977/cg04154<br>027/cg09655403/cg1<br>0257870/cg15197065<br>/cg23279355 | 0.688829998                                                    | 0.768865107 | 0.846506731 | 0.157676733  | 9.26E-10     | 2.12E-08    |             |
| TSS200 | CNBD1   | 8  | 87878605                                                                  | 1                                                                             | cg00374101                                                     | 0.69649682  | 0.572691322 | 0.398347268  | -0.298149552 | 5.85E-11    | 2.69E-09    |
| TSS200 | CNKS1   | 1  | 26503847/2650385<br>8/26503862/265039 5<br>79/26503933                    | cg00300879/cg09890<br>400/cg10096100/cg2<br>3602478/cg26412358                | 0.537256148                                                    | 0.438973347 | 0.356895845 | -0.180360302 | 3.02E-10     | 8.77E-09    |             |
| TSS200 | CNTN1   | 12 | 41086274/4108630<br>8/41086227/410862<br>82/41086198/41086 6<br>277       | cg02622052/cg14436<br>862/cg15087347/cg2<br>0574502/cg22560190<br>/cg23500059 | 0.178425071                                                    | 0.255709375 | 0.405423064 | 0.226997993  | 8.87E-07     | 7.64E-06    |             |
| TSS200 | CNTNAP2 | 7  | 145813413/145813<br>439/145813417/145 6<br>813437/145813421/<br>145813432 | cg05749717/cg07028<br>533/cg11592503/cg1<br>6910830/cg21126583<br>/cg23708361 | 0.267646063                                                    | 0.322436781 | 0.459613186 | 0.191967122  | 4.81E-06     | 3.43E-05    |             |
| TSS200 | CNTNAP5 | 2  | 124782817/124782<br>831/124782713                                         | 3                                                                             | cg04168670/cg08790<br>440/cg12919006                           | 0.445512275 | 0.494088333 | 0.675895377  | 0.230383102  | 1.23E-08    | 1.81E-07    |
| TSS200 | COL14A1 | 8  | 121137288                                                                 | 1                                                                             | cg04242021                                                     | 0.225259055 | 0.263707654 | 0.38538923   | 0.160130175  | 0.00269389  | 0.010131158 |
| TSS200 | COL15A1 | 9  | 101706041/101705<br>939                                                   | 2                                                                             | cg13952031/cg18115<br>656                                      | 0.188495416 | 0.24934604  | 0.373713715  | 0.185218299  | 5.44E-05    | 0.000298407 |
| TSS200 | COL17A1 | 10 | 105845720                                                                 | 1                                                                             | cg08509991                                                     | 0.449985545 | 0.355990467 | 0.274267736  | -0.175717809 | 5.49E-10    | 1.41E-08    |
| TSS200 | COL23A1 | 5  | 178017669/178017<br>571/178017578/178 4<br>017667                         | 4                                                                             | cg08496276/cg23437<br>733/cg25437410/cg2<br>6667699            | 0.058939886 | 0.151928206 | 0.27882534   | 0.219885454  | 0.001074817 | 0.004427582 |
| TSS200 | COL25A1 | 4  | 110223830/110223<br>969/110223980/110 5<br>223967/110223959               | 5                                                                             | cg04188273/cg05791<br>136/cg07095995/cg1<br>1979589/cg22266749 | 0.212437717 | 0.290883166 | 0.44103929   | 0.228601573  | 0.000180435 | 0.000884829 |



|        |          |    |                                                           |   |                                                                |             |             |             |              |             |             |
|--------|----------|----|-----------------------------------------------------------|---|----------------------------------------------------------------|-------------|-------------|-------------|--------------|-------------|-------------|
| TSS200 | COL8A1   | 3  | 99357437                                                  | 1 | cg19968403                                                     | 0.15295945  | 0.204669234 | 0.326836297 | 0.173876847  | 0.000103197 | 0.000534599 |
| TSS200 | COLEC12  | 18 | 500817                                                    | 1 | cg16943083                                                     | 0.118796845 | 0.134338515 | 0.334893467 | 0.216096622  | 9.29E-05    | 0.000486486 |
| TSS200 | CPA1     | 7  | 130020130/130020<br>096                                   | 2 | cg02303016/cg25718<br>383                                      | 0.529344893 | 0.470278289 | 0.367697393 | -0.161647499 | 2.22E-09    | 4.28E-08    |
| TSS200 | CPA2     | 7  | 129906627                                                 | 1 | cg22213042                                                     | 0.54288492  | 0.411284294 | 0.312412886 | -0.230472034 | 3.37E-12    | 4.48E-10    |
| TSS200 | CPB2     | 13 | 46679242                                                  | 1 | cg18634760                                                     | 0.664349625 | 0.532603528 | 0.409007359 | -0.255342266 | 3.61E-11    | 1.90E-09    |
| TSS200 | CPO      | 2  | 207804081                                                 | 1 | cg03731898                                                     | 0.724231925 | 0.6369456   | 0.506386923 | -0.217845002 | 8.95E-06    | 5.97E-05    |
| TSS200 | CPXM2    | 10 | 125651526/125651<br>549/125651621/125<br>651697/125651588 | 5 | cg03630088/cg05801<br>246/cg08615567/cg0<br>8627010/cg13702196 | 0.291234521 | 0.35415227  | 0.444101616 | 0.152867094  | 2.04E-06    | 1.61E-05    |
| TSS200 | CR1L     | 1  | 207818434/207818<br>395/207818423/207<br>818449           | 4 | cg00115980/cg09557<br>387/cg11752769/cg2<br>6750487            | 0.205639833 | 0.286118137 | 0.388702509 | 0.183062676  | 9.19E-06    | 6.10E-05    |
| TSS200 | CRHR2    | 7  | 30722327/3072216<br>3/30722177/307223<br>20               | 4 | cg01718447/cg04863<br>452/cg07658503/cg2<br>1773872            | 0.184872435 | 0.304892999 | 0.468855352 | 0.283982917  | 1.79E-06    | 1.43E-05    |
| TSS200 | CRISP1   | 6  | 49834296                                                  | 1 | cg23370360                                                     | 0.781384375 | 0.700545567 | 0.573292968 | -0.208091407 | 6.80E-06    | 4.67E-05    |
| TSS200 | CRISPLD1 | 8  | 75896836/7589679<br>8/75896801/758967<br>20/75896645      | 5 | cg01937650/cg04410<br>024/cg14283968/cg1<br>5953602/cg21844856 | 0.248088089 | 0.316216044 | 0.455118015 | 0.207029926  | 3.87E-09    | 6.90E-08    |
| TSS200 | CRTAC1   | 10 | 99790596/9979076<br>1/99790593                            | 3 | cg11302943/cg14233<br>354/cg23335460                           | 0.22937053  | 0.276184788 | 0.412515619 | 0.183145089  | 1.70E-05    | 0.000105905 |
| TSS200 | CRYGA    | 2  | 209028478/209028<br>399                                   | 2 | cg11729430/cg24360<br>225                                      | 0.607936485 | 0.515281142 | 0.429922868 | -0.178013617 | 2.21E-08    | 2.97E-07    |
| TSS200 | CRYGD    | 2  | 208989425/208989<br>469/208989382/208<br>989324           | 4 | cg00018606/cg12073<br>779/cg23405212/cg2<br>5429719            | 0.43459905  | 0.504436481 | 0.641548767 | 0.206949717  | 7.20E-08    | 8.28E-07    |
| TSS200 | CSF3     | 17 | 38171530                                                  | 1 | cg23207054                                                     | 0.43406295  | 0.356452567 | 0.280213882 | -0.153849068 | 3.56E-09    | 6.46E-08    |
| TSS200 | CSRNP3   | 2  | 166428802/166428<br>866                                   | 2 | cg24993990/cg26853<br>855                                      | 0.422139738 | 0.334958972 | 0.265341907 | -0.156797831 | 6.23E-11    | 2.81E-09    |
| TSS200 | CST9L    | 20 | 23549522/2354946<br>7/23549495/235495<br>25/23549455      | 5 | cg04982166/cg08648<br>286/cg12184157/cg1<br>2633918/cg27655855 | 0.692268265 | 0.638631    | 0.523703145 | -0.16856512  | 7.48E-09    | 1.19E-07    |
| TSS200 | CTSE     | 1  | 206317403                                                 | 1 | cg21478437                                                     | 0.578389865 | 0.471967594 | 0.400056514 | -0.178333351 | 3.22E-09    | 5.91E-08    |
| TSS200 | CTXN3    | 5  | 126984564/126988<br>647                                   | 2 | cg02743342/cg19804<br>027                                      | 0.678026338 | 0.6133783   | 0.521053257 | -0.156973081 | 8.00E-08    | 9.04E-07    |
| TSS200 | CXCL14   | 5  | 134915085/134915<br>088/134915042                         | 3 | cg07516956/cg10179<br>196/cg25011337                           | 0.27851219  | 0.365116611 | 0.449525473 | 0.171013283  | 7.20E-06    | 4.91E-05    |

|        |         |    |                                                                   |   |                                                                               |             |             |             |              |             |             |
|--------|---------|----|-------------------------------------------------------------------|---|-------------------------------------------------------------------------------|-------------|-------------|-------------|--------------|-------------|-------------|
| TSS200 | CYP17A1 | 10 | 104597307/104597<br>435/104597359                                 | 3 | cg02721701/cg04471<br>890/cg05885577                                          | 0.660912105 | 0.565726278 | 0.488894895 | -0.17201721  | 1.37E-06    | 1.13E-05    |
| TSS200 | CYP1A2  | 15 | 75041150                                                          | 1 | cg11473616                                                                    | 0.81962889  | 0.702935961 | 0.541688595 | -0.277940295 | 1.06E-08    | 1.60E-07    |
| TSS200 | CYP26C1 | 10 | 94820892/9482095<br>4/94820923/948209<br>45/94820927/94820<br>988 | 6 | cg01416891/cg04564<br>481/cg05219493/cg1<br>1234637/cg17743250<br>/cg25083618 | 0.623799233 | 0.725643172 | 0.805741153 | 0.18194192   | 1.71E-10    | 5.66E-09    |
| TSS200 | CYP2C9  | 10 | 96698366                                                          | 1 | cg09550024                                                                    | 0.493582465 | 0.394407794 | 0.327890914 | -0.165691551 | 2.80E-10    | 8.24E-09    |
| TSS200 | CYP2E1  | 10 | 135340740/135340<br>721/135340785/135<br>340850                   | 4 | cg00436603/cg01465<br>364/cg14250048/cg1<br>9571004                           | 0.666363424 | 0.584704046 | 0.473894984 | -0.19246844  | 7.59E-09    | 1.20E-07    |
| TSS200 | CYP4F8  | 19 | 15725989/1572587<br>4                                             | 2 | cg07512206/cg18680<br>587                                                     | 0.57535598  | 0.496007906 | 0.395980332 | -0.179375648 | 7.77E-08    | 8.81E-07    |
| TSS200 | CYP7B1  | 8  | 65711391/6571139<br>6/65711369/657115<br>22/65711416              | 5 | cg03535659/cg09975<br>850/cg15160198/cg1<br>9424531/cg22287624                | 0.227793819 | 0.299743626 | 0.391811323 | 0.164017504  | 0.001131323 | 0.004633698 |
| TSS200 | CYTL1   | 4  | 5021311/5021328/5<br>021203/5021236/50<br>21268                   | 5 | cg04887807/cg05985<br>589/cg06007271/cg1<br>3255282/cg17563034                | 0.298601852 | 0.400899528 | 0.465318106 | 0.166716254  | 0.000184837 | 0.000901825 |
| TSS200 | CYYR1   | 21 | 27945708                                                          | 1 | cg21039874                                                                    | 0.210667947 | 0.284675544 | 0.377040555 | 0.166372608  | 1.49E-05    | 9.43E-05    |
| TSS200 | DAB1    | 1  | 58716377/5871630<br>6/58716257                                    | 3 | cg06710648/cg11256<br>607/cg26345888                                          | 0.371692692 | 0.441107141 | 0.559489904 | 0.187797213  | 1.54E-05    | 9.71E-05    |
| TSS200 | DAO     | 12 | 109273766/109273<br>835/109273780                                 | 3 | cg01694331/cg18037<br>826/cg25362648                                          | 0.591403012 | 0.510217652 | 0.415892145 | -0.175510866 | 1.15E-10    | 4.24E-09    |
| TSS200 | DBC1    | 9  | 122131895                                                         | 1 | cg12821278                                                                    | 0.38583843  | 0.46795035  | 0.665142118 | 0.279303688  | 1.60E-06    | 1.30E-05    |
| TSS200 | DBH     | 9  | 136501420                                                         | 1 | cg06708731                                                                    | 0.617715115 | 0.515037606 | 0.423435255 | -0.19427986  | 7.31E-09    | 1.17E-07    |
| TSS200 | DBX1    | 11 | 20181911/2018188<br>7/20181879/201820<br>21/20182063/20181<br>877 | 6 | cg02878244/cg03983<br>645/cg06989930/cg1<br>1831238/cg16938805<br>/cg18292664 | 0.37737959  | 0.465553361 | 0.594145718 | 0.216766128  | 2.69E-08    | 3.51E-07    |
| TSS200 | DBX2    | 12 | 45445057/4544490<br>2/45444895/454450<br>61/45445023              | 5 | cg12915695/cg13031<br>210/cg13186327/cg1<br>6080781/cg26274596                | 0.205081183 | 0.259889082 | 0.434139299 | 0.229058116  | 5.20E-05    | 0.000286754 |
| TSS200 | DCC     | 18 | 49866412/4986653<br>1/49866407/498663<br>71/49866361              | 5 | cg00027400/cg07897<br>248/cg07935012/cg1<br>9042459/cg19613722                | 0.267360484 | 0.321942894 | 0.458893908 | 0.191533424  | 3.62E-06    | 2.66E-05    |
| TSS200 | DCD     | 12 | 55042293                                                          | 1 | cg25372195                                                                    | 0.53370068  | 0.415094111 | 0.301568245 | -0.232132435 | 8.05E-11    | 3.33E-09    |

|        |                  |    |                                                                                                                                                           |    |                                                                                                                                                                                           |             |             |             |              |             |             |
|--------|------------------|----|-----------------------------------------------------------------------------------------------------------------------------------------------------------|----|-------------------------------------------------------------------------------------------------------------------------------------------------------------------------------------------|-------------|-------------|-------------|--------------|-------------|-------------|
| TSS200 | DCLK1            | 13 | 36705622/3670560<br>6/36705475/367056 4<br>08                                                                                                             |    | cg24239329/cg25012<br>919/cg25724283/cg2<br>5943503                                                                                                                                       | 0.308429298 | 0.336695052 | 0.48766075  | 0.179231453  | 0.001575491 | 0.006264125 |
| TSS200 | DDX25            | 11 | 125774092/125774<br>090/125774082                                                                                                                         | 3  | cg01736784/cg04609<br>163/cg23727983                                                                                                                                                      | 0.494427625 | 0.631675983 | 0.748766741 | 0.254339116  | 3.99E-11    | 2.02E-09    |
| TSS200 | DEFA6            | 8  | 6783670                                                                                                                                                   | 1  | cg08312330                                                                                                                                                                                | 0.76306387  | 0.602948422 | 0.492708895 | -0.270354975 | 1.01E-12    | 2.17E-10    |
| TSS200 | DEFB121          | 20 | 29994173/2999408<br>9                                                                                                                                     | 2  | cg04476891/cg23204<br>384                                                                                                                                                                 | 0.5179359   | 0.4071666   | 0.2997649   | -0.218171    | 1.73E-11    | 1.20E-09    |
| TSS200 | DEFB124          | 20 | 30060884/3006082<br>2/30060868/300610 4<br>02                                                                                                             | 4  | cg02612927/cg03900<br>072/cg13405782/cg1<br>7418055                                                                                                                                       | 0.558587691 | 0.472635844 | 0.349981488 | -0.208606204 | 2.59E-12    | 3.96E-10    |
| TSS200 | DEFB125          | 20 | 68170                                                                                                                                                     | 1  | cg08088390                                                                                                                                                                                | 0.547577015 | 0.441089389 | 0.388875386 | -0.158701629 | 3.62E-06    | 2.66E-05    |
| TSS200 | DEFB129          | 20 | 207858/207803                                                                                                                                             | 2  | cg02046532/cg26281<br>051                                                                                                                                                                 | 0.77596844  | 0.667373461 | 0.546815114 | -0.229153326 | 1.28E-07    | 1.36E-06    |
| TSS200 | DEFB134          | 8  | 11853920/1185387<br>8                                                                                                                                     | 2  | cg01468193/cg02101<br>571                                                                                                                                                                 | 0.619004203 | 0.478109281 | 0.363018307 | -0.255985896 | 3.23E-10    | 9.22E-09    |
| TSS200 | DGKG             | 3  | 186080180/186080<br>043/186080208/186 4<br>080023                                                                                                         | 4  | cg02567082/cg14601<br>136/cg15738605/cg2<br>5808906                                                                                                                                       | 0.100521938 | 0.145630393 | 0.326807706 | 0.226285768  | 2.75E-06    | 2.09E-05    |
| TSS200 | DGKI             | 7  | 137531612/137531<br>801/137531791/137 4<br>531697                                                                                                         | 4  | cg04425632/cg18324<br>707/cg22428147/cg2<br>3299133                                                                                                                                       | 0.326016445 | 0.368118769 | 0.508073432 | 0.182056987  | 2.52E-06    | 1.94E-05    |
| TSS200 | DKFZP434H16<br>8 | 16 | 56228498/5622851<br>1/56228505/562285<br>77/56228467/56228<br>495/56228442                                                                                | 7  | cg00246932/cg01157<br>070/cg02667667/cg0<br>6780839/cg07700514<br>/cg07829842/cg1904<br>7292                                                                                              | 0.113126065 | 0.229547982 | 0.505039465 | 0.391913399  | 6.59E-08    | 7.66E-07    |
| TSS200 | DKK3             | 11 | 12031099/1203026<br>8/12031097/120306<br>39/12030278/12031<br>093/12031113/1203<br>0643/12030375/120<br>30187/12030272/12<br>030648/12030289/1<br>2031046 | 14 | cg01286655/cg04100<br>696/cg05106294/cg0<br>6188670/cg06943667<br>/cg08662017/cg1266<br>8155/cg13216057/cg<br>13259205/cg1691582<br>1/cg17039391/cg187<br>68414/cg20973347/c<br>g24543696 | 0.204293821 | 0.235952564 | 0.379257316 | 0.174963495  | 2.50E-05    | 0.000148941 |
| TSS200 | DLGAP1           | 18 | 3845348                                                                                                                                                   | 1  | cg27602828                                                                                                                                                                                | 0.753566085 | 0.705258728 | 0.592490614 | -0.161075471 | 9.29E-05    | 0.000486613 |
| TSS200 | DNAH11           | 7  | 21582758/2158274<br>9/21582745                                                                                                                            | 3  | cg01122187/cg08570<br>341/cg16474297                                                                                                                                                      | 0.158832395 | 0.15329108  | 0.341847322 | 0.183014927  | 0.000637313 | 0.002744346 |
| TSS200 | DNAH8            | 6  | 38690530                                                                                                                                                  | 1  | cg24883664                                                                                                                                                                                | 0.56260724  | 0.428523194 | 0.342720082 | -0.219887158 | 4.08E-12    | 4.87E-10    |
| TSS200 | DNAJC15          | 13 | 43597297/4359733<br>1                                                                                                                                     | 2  | cg05035143/cg12504<br>148                                                                                                                                                                 | 0.69693372  | 0.556005967 | 0.52909105  | -0.16784267  | 0.00408135  | 0.014730787 |

|        |         |    |                                                                       |   |                                                                              |             |             |             |              |             |             |
|--------|---------|----|-----------------------------------------------------------------------|---|------------------------------------------------------------------------------|-------------|-------------|-------------|--------------|-------------|-------------|
| TSS200 | DOCK2   | 5  | 169064071                                                             | 1 | cg21771173                                                                   | 0.213913895 | 0.308646972 | 0.386503018 | 0.172589123  | 3.24E-05    | 0.00018734  |
| TSS200 | DOK5    | 20 | 53092233/53092259                                                     | 2 | cg00741836/cg27341128                                                        | 0.209063085 | 0.261758188 | 0.426475869 | 0.217412784  | 0.000110314 | 0.000568106 |
| TSS200 | DPCR1   | 6  | 30908739/30908706/30908620/30908579                                   | 4 | cg04572540/cg13978352/cg15480919/cg24836242                                  | 0.570527761 | 0.480700028 | 0.413546302 | -0.156981459 | 6.99E-08    | 8.07E-07    |
| TSS200 | DPP6    | 7  | 153749759/154002270/154002312/153749738/153749756/153749736/153584416 | 7 | cg02485566/cg05640128/cg07590961/cg09124223/cg15549927/cg18940047/cg22620221 | 0.387334567 | 0.460988191 | 0.583931457 | 0.19659689   | 3.61E-10    | 1.01E-08    |
| TSS200 | DPPA2   | 3  | 109035405/109035469/109035383/109035381                               | 4 | cg01895333/cg11759378/cg18098079/cg18992201                                  | 0.848832195 | 0.775281698 | 0.639093261 | -0.209738934 | 9.16E-07    | 7.87E-06    |
| TSS200 | DPPA3   | 12 | 7864076/7864058/7864013/7864047                                       | 4 | cg06872381/cg15873123/cg17723761/cg22205501                                  | 0.797260523 | 0.736395638 | 0.627559497 | -0.169701026 | 1.64E-06    | 1.32E-05    |
| TSS200 | DPPA5   | 6  | 74063982/74064149/74064047/74064140/74064064                          | 5 | cg01652244/cg09071762/cg15414745/cg18052665/cg23414861                       | 0.589432718 | 0.513170675 | 0.419295386 | -0.170137331 | 2.10E-05    | 0.000128069 |
| TSS200 | DPY19L2 | 12 | 64062505/64062544/64062542/64062526/64062384/64062498                 | 6 | cg02660347/cg06995920/cg10967101/cg17477445/cg21346925/cg23148701            | 0.29425179  | 0.373861847 | 0.518522093 | 0.224270303  | 1.17E-08    | 1.73E-07    |
| TSS200 | DRD4    | 11 | 637173/637170/637175/637162                                           | 4 | cg00556112/cg06825142/cg12928379/cg20931042                                  | 0.132138934 | 0.124251499 | 0.296712788 | 0.164573854  | 0.002212486 | 0.008507361 |
| TSS200 | DSCAM   | 21 | 42219193/42219139/42219202/42219211/42219221                          | 5 | cg07962392/cg12135856/cg12201779/cg12409525/cg19776080                       | 0.387601025 | 0.444155772 | 0.58755047  | 0.199949445  | 1.54E-07    | 1.60E-06    |
| TSS200 | DSG3    | 18 | 29027701/29027658                                                     | 2 | cg03238162/cg06559576                                                        | 0.48270069  | 0.38610165  | 0.293976427 | -0.188724263 | 2.70E-09    | 5.07E-08    |
| TSS200 | DSPP    | 4  | 88529516/88529584                                                     | 2 | cg04503912/cg05292310                                                        | 0.612353905 | 0.446710172 | 0.312553486 | -0.299800419 | 1.93E-13    | 9.53E-11    |
| TSS200 | DUSP13  | 10 | 76859383/76859441/76859295/76859248/76859323/76859350                 | 6 | cg04369919/cg10522115/cg11709896/cg12256803/cg19532742/cg24634577            | 0.632840253 | 0.542655666 | 0.440210864 | -0.192629389 | 1.73E-11    | 1.20E-09    |
| TSS200 | DYDC1   | 10 | 82116571/82116596                                                     | 2 | cg01527459/cg12640394                                                        | 0.2575856   | 0.335183755 | 0.495825223 | 0.238239623  | 0.000142361 | 0.000715391 |

|        |        |    |                                                                                       |   |                                                                                              |             |             |             |              |             |             |
|--------|--------|----|---------------------------------------------------------------------------------------|---|----------------------------------------------------------------------------------------------|-------------|-------------|-------------|--------------|-------------|-------------|
| TSS200 | DYDC2  | 10 | 82116382/8211636<br>5/82116446/821164<br>05/82116392/82116<br>456                     | 6 | cg11036831/cg11854<br>806/cg12091732/cg1<br>3087076/cg16771783<br>/cg25535587                | 0.191602304 | 0.26811273  | 0.413836301 | 0.222233996  | 0.00010477  | 0.000541858 |
| TSS200 | DZIP1  | 13 | 96296983/9629699<br>7/96297051/962970<br>53/96297058/96296<br>979                     | 6 | cg02788400/cg05505<br>803/cg15792252/cg1<br>8206952/cg24107021<br>/cg26886381                | 0.175503546 | 0.211596428 | 0.332465496 | 0.156961951  | 0.001616396 | 0.006413926 |
| TSS200 | EDNRB  | 13 | 78493100/7849301<br>2/78493066/784931<br>26/78493128                                  | 5 | cg04390523/cg06179<br>060/cg06971129/cg1<br>3818654/cg15836660                               | 0.245177538 | 0.395607701 | 0.575186885 | 0.330009348  | 2.32E-11    | 1.46E-09    |
| TSS200 | EFEMP1 | 2  | 56150942/5615047<br>8/56150475/561510<br>71/56150549                                  | 5 | cg05168033/cg05385<br>513/cg16100120/cg1<br>6118212/cg25046074                               | 0.310631115 | 0.377432707 | 0.500137535 | 0.18950642   | 1.55E-06    | 1.27E-05    |
| TSS200 | EFHA2  | 8  | 16884576/1688455<br>5/16884549                                                        | 3 | cg00720475/cg05956<br>498/cg18577280                                                         | 0.119189488 | 0.235860501 | 0.466411998 | 0.34722251   | 1.88E-08    | 2.58E-07    |
| TSS200 | EFHB   | 3  | 19975738                                                                              | 1 | cg08219773                                                                                   | 0.594174605 | 0.495843889 | 0.419835668 | -0.174338937 | 9.13E-09    | 1.41E-07    |
| TSS200 | EFS    | 14 | 23834995/2383486<br>0/23834909/238348<br>91/23834977/23834<br>985                     | 6 | cg02213260/cg11840<br>125/cg13011388/cg1<br>4370314/cg18844382<br>/cg21013866                | 0.272455322 | 0.338436705 | 0.487286281 | 0.214830959  | 1.61E-06    | 1.30E-05    |
| TSS200 | EHD3   | 2  | 31456761/3145678<br>9/31456747/314567<br>75/31456741/31456<br>804                     | 6 | cg00981472/cg05882<br>522/cg06773122/cg1<br>8444347/cg25202298<br>/cg27230038                | 0.065592762 | 0.163218186 | 0.232593569 | 0.167000807  | 0.001246305 | 0.005071739 |
| TSS200 | EID3   | 12 | 104697389/104697<br>545/104697387/104<br>697419/104697526/<br>104697532/104697<br>514 | 7 | cg03817911/cg09477<br>407/cg18633684/cg2<br>0923245/cg21234561<br>/cg26614816/cg2720<br>5904 | 0.245901051 | 0.400084094 | 0.594826503 | 0.348925453  | 1.98E-10    | 6.39E-09    |
| TSS200 | ELANE  | 19 | 852284/852114                                                                         | 2 | cg03633458/cg06100<br>973                                                                    | 0.583008765 | 0.450556036 | 0.389131357 | -0.193877408 | 1.70E-12    | 2.88E-10    |
| TSS200 | ELK4   | 1  | 205602036/205602<br>113                                                               | 2 | cg16894746/cg23201<br>841                                                                    | 0.543342913 | 0.442797003 | 0.379610564 | -0.163732349 | 3.35E-10    | 9.53E-09    |
| TSS200 | ELMO3  | 16 | 67232921                                                                              | 1 | cg26178184                                                                                   | 0.596437915 | 0.492490056 | 0.4066583   | -0.189779615 | 2.47E-10    | 7.45E-09    |
| TSS200 | EMID2  | 7  | 101006063/101006<br>019/101006089/101<br>006035/101006052/<br>101006058               | 6 | cg14874750/cg17361<br>163/cg18762727/cg2<br>3424003/cg27179533<br>/cg27528510                | 0.313617047 | 0.41950658  | 0.576084525 | 0.262467479  | 1.72E-07    | 1.76E-06    |

|        |         |    |                                                                                                                                       |    |                                                                                                                                                  |             |             |             |              |             |             |
|--------|---------|----|---------------------------------------------------------------------------------------------------------------------------------------|----|--------------------------------------------------------------------------------------------------------------------------------------------------|-------------|-------------|-------------|--------------|-------------|-------------|
| TSS200 | EMILIN3 | 20 | 39995652/3999564<br>9/39995546/399956<br>54/39995539/39995<br>542                                                                     | 6  | cg07609788/cg08463<br>758/cg13919438/cg1<br>8587340/cg23226129<br>/cg25481073                                                                    | 0.187842254 | 0.212291102 | 0.352683859 | 0.164841605  | 7.61E-06    | 5.16E-05    |
| TSS200 | EMR4P   | 19 | 6990919                                                                                                                               | 1  | cg11579116                                                                                                                                       | 0.467739415 | 0.366626939 | 0.292965636 | -0.174773779 | 8.09E-10    | 1.90E-08    |
| TSS200 | EPHA10  | 1  | 38230887/3823082<br>7/38230834/382308<br>45                                                                                           | 4  | cg06163371/cg07447<br>922/cg18537001/cg2<br>1306240                                                                                              | 0.373490368 | 0.466220863 | 0.59515204  | 0.221661672  | 2.39E-06    | 1.85E-05    |
| TSS200 | EPHA5   | 4  | 66535732/6653565<br>5                                                                                                                 | 2  | cg01101647/cg24620<br>673                                                                                                                        | 0.19284365  | 0.2527522   | 0.35487468  | 0.16203103   | 6.84E-05    | 0.000366248 |
| TSS200 | EPHA7   | 6  | 94129431/9412948<br>1/94129412                                                                                                        | 3  | cg03696441/cg08734<br>918/cg19504032                                                                                                             | 0.175495591 | 0.174092491 | 0.326565406 | 0.151069815  | 0.004098518 | 0.014789364 |
| TSS200 | EPO     | 7  | 100318319/100318<br>223/100318321/100<br>318239                                                                                       | 4  | cg01692340/cg07841<br>815/cg13207797/cg2<br>6071806                                                                                              | 0.119480817 | 0.14771532  | 0.292341055 | 0.172860238  | 0.001415413 | 0.005685084 |
| TSS200 | EPS8L3  | 1  | 110306591/110306<br>642                                                                                                               | 2  | cg00491404/cg03956<br>353                                                                                                                        | 0.517413713 | 0.423706358 | 0.347689391 | -0.169724322 | 4.82E-11    | 2.34E-09    |
| TSS200 | ESPNL   | 2  | 239008929/239008<br>943                                                                                                               | 2  | cg02413938/cg19391<br>697                                                                                                                        | 0.65977344  | 0.568363578 | 0.494395164 | -0.165378276 | 6.64E-08    | 7.71E-07    |
| TSS200 | EVC     | 4  | 5712884/5712840/5<br>712842                                                                                                           | 3  | cg01333350/cg06918<br>887/cg25213928                                                                                                             | 0.127460136 | 0.230972145 | 0.452348692 | 0.324888556  | 3.37E-07    | 3.20E-06    |
| TSS200 | EVC2    | 4  | 5710411/5710407/5<br>710403/5711301/57<br>10319/5710372/571<br>0337                                                                   | 7  | cg01834022/cg05542<br>338/cg06426416/cg0<br>9558315/cg14654886<br>/cg17255450/cg2743<br>4509                                                     | 0.422789143 | 0.5009266   | 0.635948132 | 0.213158989  | 1.04E-07    | 1.14E-06    |
| TSS200 | EVPL    | 17 | 74023630/7402362<br>5/74023633                                                                                                        | 3  | cg18657389/cg19927<br>565/cg25255429                                                                                                             | 0.534442692 | 0.460397057 | 0.381546762 | -0.15289593  | 1.45E-10    | 5.04E-09    |
| TSS200 | EYA4    | 6  | 133562332/133562<br>461/133562466/133<br>562463/133562479/<br>133562470/133562<br>485/133562336/133<br>562334/133562475/<br>133562492 | 11 | cg01328892/cg05085<br>230/cg06132028/cg0<br>8712932/cg11664500<br>/cg11942956/cg1428<br>7112/cg16347317/cg<br>17838029/cg2078717<br>3/cg22871668 | 0.202485412 | 0.319657004 | 0.467307546 | 0.264822134  | 1.29E-06    | 1.07E-05    |
| TSS200 | FABP4   | 8  | 82395569                                                                                                                              | 1  | cg19422565                                                                                                                                       | 0.687758385 | 0.65046045  | 0.498557782 | -0.189200603 | 1.08E-09    | 2.37E-08    |
| TSS200 | FAIM2   | 12 | 50297793/5029777<br>7                                                                                                                 | 2  | cg06947913/cg18486<br>102                                                                                                                        | 0.294380946 | 0.37885231  | 0.542116516 | 0.24773557   | 4.02E-05    | 0.000228258 |
| TSS200 | FAM102A | 9  | 130713088                                                                                                                             | 1  | cg13692655                                                                                                                                       | 0.679282115 | 0.563830344 | 0.513330286 | -0.165951829 | 2.19E-10    | 6.83E-09    |

|        |         |    |                                                                         |   |                                                                                |             |             |             |              |             |             |
|--------|---------|----|-------------------------------------------------------------------------|---|--------------------------------------------------------------------------------|-------------|-------------|-------------|--------------|-------------|-------------|
| TSS200 | FAM123A | 13 | 25745946/2574598<br>6/25746007/257460<br>12                             | 4 | cg03369269/cg18034<br>232/cg22141111/cg2<br>4296626                            | 0.267819258 | 0.346982947 | 0.456655305 | 0.188836047  | 1.58E-07    | 1.63E-06    |
| TSS200 | FAM151A | 1  | 55089365/5508937<br>2                                                   | 2 | cg04919581/cg13458<br>781                                                      | 0.412900655 | 0.315883683 | 0.258974023 | -0.153926632 | 2.27E-09    | 4.36E-08    |
| TSS200 | FAM155A | 13 | 108519554/108519<br>547                                                 | 2 | cg10118210/cg10245<br>910                                                      | 0.363702403 | 0.376628327 | 0.540404452 | 0.17670205   | 0.001723238 | 0.006800236 |
| TSS200 | FAM162B | 6  | 117087083/117087<br>010/117087056/117<br>086931/117086941/<br>117086996 | 6 | cg03137522/cg08849<br>150/cg09251292/cg1<br>3631916/cg24805875<br>/cg27550270  | 0.213215596 | 0.254507884 | 0.398737478 | 0.185521882  | 7.69E-07    | 6.70E-06    |
| TSS200 | FAM170A | 5  | 118965233/118965<br>093/118965199/118<br>965202                         | 4 | cg01229506/cg06903<br>010/cg23314948/cg2<br>4537512                            | 0.792483791 | 0.723170746 | 0.609695519 | -0.182788272 | 3.15E-09    | 5.79E-08    |
| TSS200 | FAM170B | 10 | 50342081/5034211<br>4/50342145                                          | 3 | cg12771178/cg14924<br>620/cg16512990                                           | 0.575756508 | 0.464462764 | 0.358137361 | -0.217619146 | 3.51E-11    | 1.88E-09    |
| TSS200 | FAM183A | 1  | 43613567/4361356<br>5/43613440/436134<br>33/43613494                    | 5 | cg04900427/cg05125<br>578/cg15961211/cg1<br>5997906/cg22608128                 | 0.195339208 | 0.243309023 | 0.421580725 | 0.226241517  | 0.000140221 | 0.000705535 |
| TSS200 | FAM183B | 7  | 38726758                                                                | 1 | cg03517998                                                                     | 0.536463415 | 0.393821633 | 0.296173718 | -0.240289697 | 8.13E-13    | 2.04E-10    |
| TSS200 | FAM184B | 4  | 17783205/1778329<br>4/17783261/177832<br>40/17783331/17783<br>322       | 6 | cg01886556/cg02108<br>033/cg05624214/cg1<br>59171116/cg18790597<br>/cg27207796 | 0.215687576 | 0.234713841 | 0.420879943 | 0.205192367  | 0.000235566 | 0.001124966 |
| TSS200 | FAM19A1 | 3  | 68053273/6805337<br>1                                                   | 2 | cg09533390/cg22706<br>186                                                      | 0.676065713 | 0.569016886 | 0.460938423 | -0.21512729  | 1.69E-08    | 2.34E-07    |
| TSS200 | FAM19A4 | 3  | 68981866/6898185<br>4/68981877/689818<br>52/68981890/68981<br>895       | 6 | cg09868336/cg12219<br>082/cg12412079/cg1<br>2417685/cg13921352<br>/cg20375342  | 0.25409692  | 0.303376729 | 0.531583568 | 0.277486648  | 1.70E-07    | 1.74E-06    |
| TSS200 | FAM19A5 | 22 | 48971959                                                                | 1 | cg04198308                                                                     | 0.131805311 | 0.240858172 | 0.383621199 | 0.251815888  | 5.07E-10    | 1.32E-08    |
| TSS200 | FAM20A  | 17 | 66554600/6655467<br>7                                                   | 2 | cg10374534/cg24909<br>667                                                      | 0.771803725 | 0.673444878 | 0.582990091 | -0.188813634 | 1.57E-08    | 2.20E-07    |
| TSS200 | FAM24A  | 10 | 124670078                                                               | 1 | cg18822598                                                                     | 0.724795685 | 0.642023011 | 0.492706173 | -0.232089512 | 3.67E-06    | 2.69E-05    |
| TSS200 | FAM25A  | 10 | 88779914/8877993<br>5/88779941                                          | 3 | cg04807739/cg15263<br>682/cg23424357                                           | 0.702269747 | 0.610583219 | 0.520554547 | -0.1817152   | 9.92E-11    | 3.89E-09    |
| TSS200 | FAM26D  | 6  | 116850057                                                               | 1 | cg03299329                                                                     | 0.685941595 | 0.567968856 | 0.500291    | -0.185650595 | 5.65E-09    | 9.41E-08    |
| TSS200 | FAM26E  | 6  | 116832794/116832<br>611                                                 | 2 | cg14547726/cg21741<br>010                                                      | 0.476882028 | 0.388619914 | 0.297254395 | -0.179627632 | 6.30E-10    | 1.56E-08    |

|        |        |    |                                                                   |   |                                                                               |             |             |             |              |             |             |
|--------|--------|----|-------------------------------------------------------------------|---|-------------------------------------------------------------------------------|-------------|-------------|-------------|--------------|-------------|-------------|
| TSS200 | FAM38B | 18 | 11148914/1114878<br>3/11148932/111487<br>76/11148769/11148<br>832 | 6 | cg03602280/cg10023<br>530/cg12951849/cg2<br>3556443/cg24362812<br>/cg25995825 | 0.424474602 | 0.542645269 | 0.655660971 | 0.23118637   | 7.52E-11    | 3.20E-09    |
| TSS200 | FAM43B | 1  | 20878928/2087876<br>0/20878811/208787<br>87                       | 4 | cg09511914/cg15142<br>222/cg19507093/cg2<br>6557658                           | 0.181229409 | 0.261726838 | 0.368824624 | 0.187595214  | 7.24E-06    | 4.94E-05    |
| TSS200 | FAM58B | 1  | 200182508                                                         | 1 | cg17956775                                                                    | 0.707585145 | 0.576531939 | 0.454063423 | -0.253521722 | 5.21E-09    | 8.78E-08    |
| TSS200 | FAM5B  | 1  | 177140510/177140<br>609                                           | 2 | cg19993589/cg21523<br>908                                                     | 0.308914248 | 0.453156744 | 0.561300273 | 0.252386025  | 4.00E-07    | 3.72E-06    |
| TSS200 | FAM83C | 20 | 33880266/3388033<br>7/33880353/338803<br>70                       | 4 | cg20555922/cg24855<br>818/cg26826207/cg2<br>7629776                           | 0.737102603 | 0.654619175 | 0.568809005 | -0.168293598 | 4.88E-08    | 5.89E-07    |
| TSS200 | FAM83E | 19 | 49116839/4911682<br>4/49116870                                    | 3 | cg10772322/cg20082<br>196/cg27530053                                          | 0.54354827  | 0.452141297 | 0.352447482 | -0.191100788 | 1.72E-10    | 5.66E-09    |
| TSS200 | FAM99A | 11 | 1686642                                                           | 1 | cg04353359                                                                    | 0.72733742  | 0.658173006 | 0.528193814 | -0.199143606 | 1.08E-08    | 1.61E-07    |
| TSS200 | FAT4   | 4  | 126237464/126237<br>371/126237421/126<br>237373/126237513         | 5 | cg03527919/cg05118<br>638/cg08644023/cg1<br>0731073/cg15795630                | 0.191660035 | 0.241493606 | 0.408754979 | 0.217094944  | 3.24E-06    | 2.42E-05    |
| TSS200 | FBLIM1 | 1  | 16085148                                                          | 1 | cg04897742                                                                    | 0.070202859 | 0.292923521 | 0.476116717 | 0.405913859  | 1.29E-09    | 2.74E-08    |
| TSS200 | FBXL21 | 5  | 135265931/135265<br>849/135265937                                 | 3 | cg13557668/cg20924<br>470/cg26664161                                          | 0.258532948 | 0.330707628 | 0.44757673  | 0.189043782  | 0.000113538 | 0.000582808 |
| TSS200 | FBXO39 | 17 | 6679495/6679482/6<br>679499/6679484/66<br>79476/6679541           | 6 | cg02093112/cg06091<br>013/cg07540103/cg0<br>8843809/cg11871421<br>/cg17097923 | 0.414734219 | 0.514230606 | 0.680763773 | 0.266029554  | 8.70E-11    | 3.54E-09    |
| TSS200 | FCGR3A | 1  | 161519989                                                         | 1 | cg18298815                                                                    | 0.60392521  | 0.507207417 | 0.405779795 | -0.198145415 | 5.88E-10    | 1.48E-08    |
| TSS200 | FCRL3  | 1  | 157670710/157670<br>825                                           | 2 | cg08786003/cg15602<br>298                                                     | 0.71051115  | 0.669765689 | 0.479001236 | -0.231509914 | 2.15E-05    | 0.000131005 |
| TSS200 | FER1L4 | 20 | 34195484                                                          | 1 | cg06575425                                                                    | 0.44958139  | 0.359398572 | 0.273202859 | -0.176378531 | 3.63E-11    | 1.90E-09    |
| TSS200 | FERD3L | 7  | 19185139/1918516<br>5                                             | 2 | cg05328547/cg11241<br>627                                                     | 0.31792262  | 0.423956408 | 0.554786209 | 0.236863589  | 2.44E-09    | 4.63E-08    |
| TSS200 | FERMT1 | 20 | 6104261/6104215/6<br>104267/6104274                               | 4 | cg07718903/cg09539<br>538/cg15692360/cg2<br>6758396                           | 0.416649188 | 0.312095402 | 0.243597807 | -0.173051381 | 2.98E-12    | 4.35E-10    |
| TSS200 | FFAR1  | 19 | 35842431                                                          | 1 | cg14978687                                                                    | 0.79397802  | 0.681085172 | 0.5487251   | -0.24525292  | 2.76E-10    | 8.14E-09    |
| TSS200 | FFAR2  | 19 | 35940461/3594048<br>3/35940593/359404<br>25                       | 4 | cg02361306/cg03062<br>717/cg18755094/cg2<br>0199836                           | 0.473830825 | 0.379270826 | 0.280947162 | -0.192883663 | 1.10E-10    | 4.18E-09    |
| TSS200 | FGA    | 4  | 155511987                                                         | 1 | cg12827188                                                                    | 0.40421215  | 0.309626172 | 0.249576477 | -0.154635673 | 8.47E-11    | 3.49E-09    |



|        |          |    |                                                                                                                         |    |                                                                                                                                       |             |             |             |              |             |             |
|--------|----------|----|-------------------------------------------------------------------------------------------------------------------------|----|---------------------------------------------------------------------------------------------------------------------------------------|-------------|-------------|-------------|--------------|-------------|-------------|
| TSS200 | FGD4     | 12 | 32655034/3265492<br>9/32654992                                                                                          | 3  | cg05681757/cg11809<br>958/cg22431093                                                                                                  | 0.435127108 | 0.361625136 | 0.28116905  | -0.153958058 | 3.08E-09    | 5.67E-08    |
| TSS200 | FGF10    | 5  | 44388799/4438897<br>2/44388907/443889<br>49/44388958                                                                    | 5  | cg00167491/cg00272<br>200/cg02443428/cg1<br>6384588/cg25103492                                                                        | 0.268241866 | 0.356122283 | 0.459234148 | 0.190992282  | 2.23E-08    | 3.00E-07    |
| TSS200 | FGF12    | 3  | 192445514/192126<br>996/192445500/192<br>445533/192445538/<br>192126935/192445<br>388/192126849/192<br>445582/192126960 | 10 | cg00902847/cg01257<br>828/cg02403395/cg0<br>6374165/cg06804312<br>/cg15048660/cg1510<br>4158/cg16366473/cg<br>22069098/cg2320771<br>0 | 0.187608949 | 0.27125367  | 0.409443492 | 0.221834543  | 8.29E-06    | 5.57E-05    |
| TSS200 | FGF2     | 4  | 123747750/123747<br>672                                                                                                 | 2  | cg04332818/cg15128<br>226                                                                                                             | 0.47547618  | 0.600769    | 0.715658059 | 0.240181879  | 1.79E-09    | 3.57E-08    |
| TSS200 | FGF3     | 11 | 69634240/6963429<br>6/69634334/696343<br>63/69634384/69634<br>372                                                       | 6  | cg00043379/cg04495<br>670/cg06329574/cg1<br>5119027/cg15554555<br>/cg24359323                                                         | 0.316839583 | 0.374040917 | 0.500367588 | 0.183528005  | 1.84E-05    | 0.000113673 |
| TSS200 | FGF4     | 11 | 69590287/6959033<br>2/69590309/695902<br>82/69590328                                                                    | 5  | cg00022558/cg02882<br>381/cg03631755/cg1<br>8947739/cg24199112                                                                        | 0.196365536 | 0.227998034 | 0.347300778 | 0.150935242  | 0.000580637 | 0.002522334 |
| TSS200 | FGF5     | 4  | 81187601/8118760<br>5/81187610                                                                                          | 3  | cg10031614/cg12528<br>713/cg20528583                                                                                                  | 0.140989149 | 0.219427081 | 0.391214603 | 0.250225454  | 3.59E-06    | 2.64E-05    |
| TSS200 | FIGN     | 2  | 164592568/164592<br>561/164592571                                                                                       | 3  | cg06564900/cg15259<br>986/cg19156483                                                                                                  | 0.330015127 | 0.401965244 | 0.537242421 | 0.207227295  | 0.000109712 | 0.000565559 |
| TSS200 | FLG      | 1  | 152297873                                                                                                               | 1  | cg19855573                                                                                                                            | 0.48787534  | 0.363211183 | 0.25841335  | -0.22946199  | 9.86E-14    | 6.22E-11    |
| TSS200 | FLG2     | 1  | 152332651                                                                                                               | 1  | cg17542852                                                                                                                            | 0.43763764  | 0.315574994 | 0.253628518 | -0.184009122 | 1.44E-12    | 2.62E-10    |
| TSS200 | FLI1     | 11 | 128563716/128563<br>634/128563714/128<br>562353/128563618/<br>128562297/128562<br>245/128563685                         | 8  | cg02526522/cg08590<br>601/cg13755070/cg1<br>4570838/cg18142615<br>/cg19296671/cg1948<br>2025/cg19897940                               | 0.17102074  | 0.25094951  | 0.387007941 | 0.215987201  | 3.47E-05    | 0.000199374 |
| TSS200 | FLJ16779 | 20 | 61885236/6188528<br>5/61885270/618852<br>49/61885291/61885<br>262                                                       | 6  | cg06763829/cg07785<br>314/cg09196068/cg1<br>5571277/cg18412834<br>/cg21258057                                                         | 0.069564278 | 0.171933272 | 0.37376137  | 0.304197093  | 6.05E-07    | 5.41E-06    |
| TSS200 | FLJ23834 | 7  | 105603622                                                                                                               | 1  | cg25747783                                                                                                                            | 0.69548239  | 0.574931128 | 0.46851185  | -0.22697054  | 4.74E-07    | 4.32E-06    |

|        |          |    |                                                       |   |                                                                   |             |             |             |              |          |             |
|--------|----------|----|-------------------------------------------------------|---|-------------------------------------------------------------------|-------------|-------------|-------------|--------------|----------|-------------|
| TSS200 | FLJ33360 | 5  | 6337408/6337520/6337430                               | 3 | cg05940966/cg23328308/cg26874163                                  | 0.713688583 | 0.630555587 | 0.562330502 | -0.151358082 | 2.00E-06 | 1.58E-05    |
| TSS200 | FLJ40330 | 2  | 89065379/89065330/89065319/89065350                   | 4 | cg02646394/cg17108748/cg20584997/cg23042796                       | 0.253752197 | 0.309471928 | 0.436620545 | 0.182868348  | 9.89E-07 | 8.45E-06    |
| TSS200 | FLJ42393 | 3  | 187896222/187896277                                   | 2 | cg21909391/cg24454374                                             | 0.53177815  | 0.407245044 | 0.314350191 | -0.217427959 | 7.62E-11 | 3.23E-09    |
| TSS200 | FLJ42875 | 1  | 2984470/2984445                                       | 2 | cg07363855/cg11229543                                             | 0.363139135 | 0.435250697 | 0.557406816 | 0.194267681  | 2.29E-05 | 0.000138149 |
| TSS200 | FLJ43390 | 14 | 62584024/62583968/62584005/62584037/62583919/62583962 | 6 | cg01613638/cg01866038/cg05173737/cg10227327/cg14926717/cg15897970 | 0.139913616 | 0.27133286  | 0.422528908 | 0.282615292  | 2.50E-08 | 3.29E-07    |
| TSS200 | FLJ43860 | 8  | 142517474/142517440/142517341/142517494               | 4 | cg00328935/cg04744713/cg25697881/cg26654519                       | 0.569931713 | 0.463472271 | 0.418773811 | -0.151157901 | 1.02E-08 | 1.55E-07    |
| TSS200 | FLRT2    | 14 | 85996352/85996393/85996364/85996315                   | 4 | cg01537995/cg04975505/cg16800165/cg23400512                       | 0.355363578 | 0.460736528 | 0.564026858 | 0.208663279  | 1.40E-07 | 1.47E-06    |
| TSS200 | FMO1     | 1  | 171217592/171217555                                   | 2 | cg04413226/cg15514848                                             | 0.76698708  | 0.706803978 | 0.58903115  | -0.17795593  | 1.20E-06 | 1.01E-05    |
| TSS200 | FNDC1    | 6  | 159590231                                             | 1 | cg00157796                                                        | 0.201576911 | 0.360219017 | 0.580746665 | 0.379169755  | 2.22E-09 | 4.28E-08    |
| TSS200 | FNDC7    | 1  | 109255376/109255473/109255480                         | 3 | cg01826444/cg12483833/cg23041045                                  | 0.650664255 | 0.567170378 | 0.466373036 | -0.184291219 | 9.32E-09 | 1.43E-07    |
| TSS200 | FOLR1    | 11 | 71902997/71903119/71900411                            | 3 | cg06400204/cg14818960/cg15418509                                  | 0.64784956  | 0.560432781 | 0.497206102 | -0.150643458 | 7.61E-08 | 8.65E-07    |
| TSS200 | FOXG1    | 14 | 29236221                                              | 1 | cg17525102                                                        | 0.369317025 | 0.4401068   | 0.57813315  | 0.208816125  | 2.57E-06 | 1.98E-05    |
| TSS200 | FOXI1    | 5  | 169532775/169532758/169532721/169532752               | 4 | cg03817107/cg08295639/cg11552829/cg19233472                       | 0.495492788 | 0.400371043 | 0.344017725 | -0.151475063 | 2.56E-09 | 4.85E-08    |
| TSS200 | FOXI2    | 10 | 129535348/12953509/129535378/129535458                | 4 | cg08829841/cg09614415/cg16642284/cg25576011                       | 0.528354993 | 0.543296683 | 0.683065261 | 0.154710267  | 4.32E-05 | 0.000243158 |
| TSS200 | FPR2     | 19 | 52264411/52266482/52264413/52264429                   | 4 | cg16052198/cg16726204/cg24964368/cg25653204                       | 0.606611637 | 0.677628937 | 0.758661003 | 0.152049366  | 4.08E-09 | 7.22E-08    |
| TSS200 | FREM3    | 4  | 144621938/144621952/144621898/144621971/144621945     | 5 | cg08334984/cg09556043/cg10056356/cg15042811/cg17495719            | 0.276775177 | 0.444996611 | 0.597750659 | 0.320975482  | 6.48E-09 | 1.05E-07    |

|        |         |    |                                                       |   |                                                                   |             |             |             |              |            |             |
|--------|---------|----|-------------------------------------------------------|---|-------------------------------------------------------------------|-------------|-------------|-------------|--------------|------------|-------------|
| TSS200 | FRK     | 6  | 116381966/116381976/116381957                         | 3 | cg05304507/cg15226275/cg18764771                                  | 0.471421303 | 0.38271912  | 0.310020133 | -0.16140117  | 1.64E-10   | 5.51E-09    |
| TSS200 | FRMD6   | 14 | 52118390/51955716                                     | 2 | cg09410986/cg18894781                                             | 0.676334455 | 0.565851583 | 0.438723055 | -0.2376114   | 2.51E-11   | 1.54E-09    |
| TSS200 | FTCD    | 21 | 47575498/47575504/47575547                            | 3 | cg09436823/cg18024037/cg25322086                                  | 0.858618705 | 0.786953669 | 0.692557889 | -0.166060816 | 5.02E-06   | 3.55E-05    |
| TSS200 | FURIN   | 15 | 91411838                                              | 1 | cg02864248                                                        | 0.607789675 | 0.482099811 | 0.383847264 | -0.223942411 | 3.46E-11   | 1.87E-09    |
| TSS200 | FUT2    | 19 | 49199172/49199217/49199029                            | 3 | cg01656853/cg08873673/cg20441902                                  | 0.456567493 | 0.363231854 | 0.27694748  | -0.179620013 | 1.23E-11   | 9.73E-10    |
| TSS200 | FUT9    | 6  | 96463710                                              | 1 | cg01489686                                                        | 0.325684825 | 0.383907833 | 0.511040618 | 0.185355793  | 2.44E-05   | 0.000146295 |
| TSS200 | FXD4    | 10 | 43867064/43867041/43867024/43866966/43867071          | 5 | cg00827318/cg03687765/cg22992966/cg24294544/cg25081201            | 0.493938703 | 0.413418148 | 0.335468974 | -0.158469729 | 1.16E-10   | 4.28E-09    |
| TSS200 | FZD10   | 12 | 130647004                                             | 1 | cg21885046                                                        | 0.255520285 | 0.31653685  | 0.479572268 | 0.224051983  | 1.65E-10   | 5.51E-09    |
| TSS200 | G6PC2   | 2  | 169757618/169757561                                   | 2 | cg00689835/cg0111179                                              | 0.50789981  | 0.410616317 | 0.302426995 | -0.205472815 | 2.24E-10   | 6.93E-09    |
| TSS200 | GABBR2  | 9  | 101471553                                             | 1 | cg18507707                                                        | 0.10555472  | 0.163371657 | 0.275268034 | 0.169713314  | 0.00027156 | 0.001275994 |
| TSS200 | GABRA5  | 15 | 27112197/27111774/27111699/27111749/27111687/27112119 | 6 | cg05044185/cg05614333/cg12555380/cg14417760/cg15035033/cg15665646 | 0.391612329 | 0.484264828 | 0.571898394 | 0.180286065  | 5.16E-08   | 6.16E-07    |
| TSS200 | GABRA6  | 5  | 161112530                                             | 1 | cg02703002                                                        | 0.649196995 | 0.480224794 | 0.373673241 | -0.275523754 | 9.96E-10   | 2.23E-08    |
| TSS200 | GAD2    | 10 | 26505127/26505069/26505156                            | 3 | cg00733780/cg04838147/cg23050442                                  | 0.234790059 | 0.393877345 | 0.584842092 | 0.350052034  | 2.85E-09   | 5.29E-08    |
| TSS200 | GAL3ST2 | 2  | 242716203/242716183                                   | 2 | cg03898010/cg04140903                                             | 0.53114712  | 0.453668944 | 0.372693909 | -0.158453211 | 1.11E-09   | 2.42E-08    |
| TSS200 | GAL3ST3 | 11 | 65816809/65816819/65816655                            | 3 | cg04337534/cg09700701/cg26763523                                  | 0.420913183 | 0.491998972 | 0.598047577 | 0.177134394  | 6.72E-10   | 1.64E-08    |
| TSS200 | GALNT13 | 2  | 154728308                                             | 1 | cg02593932                                                        | 0.38300914  | 0.394353661 | 0.590584686 | 0.207575546  | 7.49E-08   | 8.56E-07    |
| TSS200 | GALNT14 | 2  | 31361687/31361593/31361701/31361760/31361692/31361757 | 6 | cg04050000/cg10258271/cg14514751/cg20599798/cg22395019/cg26988215 | 0.127646205 | 0.155388395 | 0.307139157 | 0.179492953  | 2.25E-05   | 0.000135892 |
| TSS200 | GALNT9  | 12 | 132690692/132690651/132906010/132690752/132690643     | 5 | cg08957127/cg09879122/cg12075445/cg14591001/cg27483007            | 0.72790701  | 0.682352328 | 0.55231575  | -0.17559126  | 2.89E-05   | 0.000169176 |
| TSS200 | GALNTL5 | 7  | 151653454                                             | 1 | cg11091262                                                        | 0.51972099  | 0.397371144 | 0.304276432 | -0.215444558 | 1.18E-11   | 9.37E-10    |

|        |         |    |                                                                                                                                                     |    |                                                                                                                                                                 |             |             |             |              |             |             |
|--------|---------|----|-----------------------------------------------------------------------------------------------------------------------------------------------------|----|-----------------------------------------------------------------------------------------------------------------------------------------------------------------|-------------|-------------|-------------|--------------|-------------|-------------|
| TSS200 | GALNTL6 | 4  | 172734514/172734<br>507/172734431                                                                                                                   | 3  | cg09772954/cg14307<br>443/cg22153181                                                                                                                            | 0.275216999 | 0.353055264 | 0.547891504 | 0.272674505  | 1.00E-08    | 1.52E-07    |
| TSS200 | GALR1   | 18 | 74961809/7496196<br>6/74962000/749619<br>68                                                                                                         | 4  | cg03032214/cg03659<br>519/cg17911318/cg2<br>0872937                                                                                                             | 0.361228119 | 0.356662058 | 0.524020253 | 0.162792135  | 0.000752631 | 0.003198124 |
| TSS200 | GALR2   | 17 | 74070698                                                                                                                                            | 1  | cg07274618                                                                                                                                                      | 0.38491863  | 0.425699411 | 0.566461882 | 0.181543252  | 3.90E-09    | 6.94E-08    |
| TSS200 | GAPT    | 5  | 57787167                                                                                                                                            | 1  | cg26453169                                                                                                                                                      | 0.417140745 | 0.297783261 | 0.214805513 | -0.202335232 | 2.77E-06    | 2.11E-05    |
| TSS200 | GAST    | 17 | 39868610/3986844<br>1                                                                                                                               | 2  | cg08928038/cg23010<br>077                                                                                                                                       | 0.687027015 | 0.5970171   | 0.494716818 | -0.192310197 | 4.25E-08    | 5.23E-07    |
| TSS200 | GATA4   | 8  | 11561593/1156153<br>1/11561584/115616<br>20                                                                                                         | 4  | cg00397986/cg02726<br>121/cg09951349/cg1<br>4900471                                                                                                             | 0.206063138 | 0.286203333 | 0.487388156 | 0.281325018  | 3.94E-08    | 4.90E-07    |
| TSS200 | GATA5   | 20 | 61051036/6105102<br>9/61051039/610510<br>32                                                                                                         | 4  | cg02484469/cg13845<br>982/cg14980983/cg2<br>0265733                                                                                                             | 0.239226922 | 0.330063522 | 0.460847161 | 0.221620239  | 0.000207261 | 0.001001012 |
| TSS200 | GATM    | 15 | 45671028/4567101<br>8/45671155/456711<br>48/45671016/45671<br>001                                                                                   | 6  | cg04025675/cg05896<br>902/cg18435832/cg2<br>0381115/cg24328539<br>/cg26796135                                                                                   | 0.486115712 | 0.586891059 | 0.673496633 | 0.187380921  | 1.83E-09    | 3.65E-08    |
| TSS200 | GBGT1   | 9  | 136039474                                                                                                                                           | 1  | cg09513259                                                                                                                                                      | 0.223261225 | 0.278216422 | 0.382270164 | 0.159008939  | 6.93E-05    | 0.000370486 |
| TSS200 | GCET2   | 3  | 111852227/111852<br>312/111852156                                                                                                                   | 3  | cg06510261/cg12663<br>553/cg25462303                                                                                                                            | 0.459048548 | 0.547589572 | 0.6277133   | 0.168664753  | 1.11E-08    | 1.66E-07    |
| TSS200 | GCM1    | 6  | 53013647                                                                                                                                            | 1  | cg20967220                                                                                                                                                      | 0.57719989  | 0.438029878 | 0.343543877 | -0.233656013 | 3.59E-11    | 1.90E-09    |
| TSS200 | GCM2    | 6  | 10882238/1088224<br>0/10882250                                                                                                                      | 3  | cg09829319/cg14250<br>833/cg20229534                                                                                                                            | 0.197304442 | 0.244470093 | 0.457785477 | 0.260481035  | 2.79E-05    | 0.000164077 |
| TSS200 | GCNT3   | 15 | 59903968                                                                                                                                            | 1  | cg00437411                                                                                                                                                      | 0.48122003  | 0.396078944 | 0.315942755 | -0.165277275 | 4.37E-10    | 1.17E-08    |
| TSS200 | GDEP    | 4  | 80748552                                                                                                                                            | 1  | cg07124719                                                                                                                                                      | 0.6897729   | 0.531455989 | 0.462399959 | -0.227372941 | 1.69E-11    | 1.19E-09    |
| TSS200 | GDF6    | 8  | 97173034                                                                                                                                            | 1  | cg21859781                                                                                                                                                      | 0.236787125 | 0.334630139 | 0.483549077 | 0.246761953  | 9.68E-08    | 1.07E-06    |
| TSS200 | GFAP    | 17 | 42992917/4299292<br>4/42993050/429929<br>76                                                                                                         | 4  | cg01769243/cg03383<br>006/cg08156531/cg2<br>1601845                                                                                                             | 0.780574764 | 0.701050817 | 0.61741326  | -0.163161504 | 1.79E-10    | 5.82E-09    |
| TSS200 | GFRA1   | 10 | 118031864/118032<br>892/118033312/118<br>032872/118031950/<br>118032879/118031<br>870/118032948/118<br>032987/118033273/<br>118033290/118032<br>905 | 12 | cg06298519/cg08194<br>313/cg11390957/cg1<br>3346013/cg17256532<br>/cg18672939/cg1948<br>5539/cg23898073/cg<br>25022687/cg2535156<br>5/cg25617725/cg273<br>41926 | 0.201009229 | 0.301030061 | 0.451227324 | 0.250218095  | 2.32E-05    | 0.000139397 |

|        |          |    |                                                                                                                         |    |                                                                                                                                       |             |             |             |              |             |             |
|--------|----------|----|-------------------------------------------------------------------------------------------------------------------------|----|---------------------------------------------------------------------------------------------------------------------------------------|-------------|-------------|-------------|--------------|-------------|-------------|
| TSS200 | GGT6     | 17 | 4464022/4464011/4<br>463911/4464075/44<br>64024                                                                         | 5  | cg00145141/cg00382<br>185/cg01984798/cg0<br>2986643/cg03044452                                                                        | 0.534290296 | 0.441044603 | 0.353287253 | -0.181003043 | 1.99E-10    | 6.40E-09    |
| TSS200 | GGTLC2   | 22 | 22988617                                                                                                                | 1  | cg01285756                                                                                                                            | 0.69294069  | 0.590919378 | 0.526311986 | -0.166628704 | 1.29E-11    | 1.00E-09    |
| TSS200 | GHRH     | 20 | 35885301                                                                                                                | 1  | cg11375072                                                                                                                            | 0.655161085 | 0.595725111 | 0.494697123 | -0.160463962 | 0.000110266 | 0.000568046 |
| TSS200 | GHSR     | 3  | 172166234/172166<br>258/172166242                                                                                       | 3  | cg15987088/cg17152<br>757/cg24599434                                                                                                  | 0.287919458 | 0.372009895 | 0.533990108 | 0.246070649  | 1.70E-09    | 3.44E-08    |
| TSS200 | GIF      | 11 | 59613120                                                                                                                | 1  | cg16550010                                                                                                                            | 0.48282656  | 0.370489117 | 0.287877491 | -0.194949069 | 3.10E-11    | 1.72E-09    |
| TSS200 | GJC2     | 1  | 228337503/228337<br>366/228337379                                                                                       | 3  | cg03065165/cg07103<br>618/cg10950111                                                                                                  | 0.639068372 | 0.548993856 | 0.435880727 | -0.203187644 | 2.68E-08    | 3.50E-07    |
| TSS200 | GJD2     | 15 | 35046765/3504676<br>0                                                                                                   | 2  | cg11525643/cg21053<br>529                                                                                                             | 0.413471005 | 0.549616089 | 0.711265257 | 0.297794252  | 1.63E-11    | 1.17E-09    |
| TSS200 | GLB1L3   | 11 | 134146266/134146<br>132/134146253/134<br>146153/134146075                                                               | 5  | cg03108229/cg03323<br>292/cg05621343/cg0<br>9395318/cg21692846                                                                        | 0.119275277 | 0.193457919 | 0.321228146 | 0.201952869  | 0.000463443 | 0.002063251 |
| TSS200 | GLIS2    | 16 | 4382072/4382081/4<br>382085/4382027                                                                                     | 4  | cg01262566/cg04719<br>112/cg08909416/cg2<br>2616007                                                                                   | 0.772746479 | 0.672128056 | 0.540527945 | -0.232218533 | 4.49E-10    | 1.20E-08    |
| TSS200 | GLRA3    | 4  | 175750583/175750<br>562/175750527/175<br>750637/175750510/<br>175750507                                                 | 6  | cg02521102/cg05990<br>549/cg09841488/cg2<br>1365094/cg23697278<br>/cg26226802                                                         | 0.232201128 | 0.307315318 | 0.494499608 | 0.26229848   | 1.27E-07    | 1.35E-06    |
| TSS200 | GLRB     | 4  | 157997173/157997<br>189/157997167/157<br>997086/157997526/<br>157997363/157997<br>367/157997079/157<br>997360/157997178 | 10 | cg04006722/cg05263<br>495/cg06436905/cg0<br>7084358/cg08712866<br>/cg09688546/cg1626<br>9431/cg18344745/cg<br>22065614/cg2591146<br>8 | 0.324132312 | 0.357718207 | 0.505912604 | 0.181780292  | 2.24E-06    | 1.75E-05    |
| TSS200 | GLT1D1   | 12 | 129337897/129337<br>910                                                                                                 | 2  | cg04054313/cg06419<br>750                                                                                                             | 0.437228165 | 0.582049456 | 0.717655577 | 0.280427412  | 1.59E-12    | 2.76E-10    |
| TSS200 | GLT8D2   | 12 | 104444006/104443<br>953/104443925/104<br>444017/104444011/<br>104444060                                                 | 6  | cg00987461/cg01283<br>482/cg08101375/cg1<br>4849798/cg16721177<br>/cg21988041                                                         | 0.112445104 | 0.170939527 | 0.280732598 | 0.168287495  | 0.00054679  | 0.00238912  |
| TSS200 | GNE      | 9  | 36258600                                                                                                                | 1  | cg21210985                                                                                                                            | 0.090427894 | 0.144191242 | 0.288399809 | 0.197971915  | 0.000898887 | 0.003764821 |
| TSS200 | GNGT1    | 7  | 93535731                                                                                                                | 1  | cg20829211                                                                                                                            | 0.745195415 | 0.6841593   | 0.54698355  | -0.198211865 | 1.38E-05    | 8.77E-05    |
| TSS200 | GOLGA6L6 | 15 | 20747248/2074720<br>0                                                                                                   | 2  | cg15030631/cg23673<br>919                                                                                                             | 0.65519362  | 0.552391811 | 0.481065005 | -0.174128615 | 6.52E-13    | 1.88E-10    |

|        |        |    |                                                                                                 |   |                                                                                                         |             |             |             |              |             |             |
|--------|--------|----|-------------------------------------------------------------------------------------------------|---|---------------------------------------------------------------------------------------------------------|-------------|-------------|-------------|--------------|-------------|-------------|
| TSS200 | GPC6   | 13 | 93879022/9387896<br>9/93879042/938790<br>08                                                     | 4 | cg00191477/cg07529<br>657/cg23246978/cg2<br>5772299                                                     | 0.162927445 | 0.19970389  | 0.350968335 | 0.188040891  | 4.93E-05    | 0.000273635 |
| TSS200 | GPR110 | 6  | 47010091/4701017<br>7                                                                           | 2 | cg06228599/cg09556<br>286                                                                               | 0.45448143  | 0.320804539 | 0.243978345 | -0.210503085 | 6.38E-12    | 6.17E-10    |
| TSS200 | GPR111 | 6  | 47624276/4762424<br>7                                                                           | 2 | cg16361253/cg18184<br>910                                                                               | 0.502977895 | 0.389388033 | 0.322885564 | -0.180092331 | 5.14E-09    | 8.70E-08    |
| TSS200 | GPR115 | 6  | 47666248                                                                                        | 1 | cg26451345                                                                                              | 0.51234432  | 0.381327294 | 0.29107665  | -0.22126767  | 3.90E-11    | 2.01E-09    |
| TSS200 | GPR123 | 10 | 134901279/134901<br>294/134901297/134<br>901301/134901305/<br>134901208                         | 6 | cg07068327/cg09639<br>725/cg15825786/cg1<br>8029761/cg23380558<br>/cg23633543                           | 0.218956693 | 0.310640385 | 0.446477687 | 0.227520994  | 2.92E-05    | 0.000170682 |
| TSS200 | GPR139 | 16 | 20085214                                                                                        | 1 | cg20086208                                                                                              | 0.20680717  | 0.263741031 | 0.387992806 | 0.181185636  | 0.003721845 | 0.013563617 |
| TSS200 | GPR15  | 3  | 98250723                                                                                        | 1 | cg19614811                                                                                              | 0.638956855 | 0.549638306 | 0.483918055 | -0.1550388   | 3.13E-05    | 0.000181617 |
| TSS200 | GPR151 | 5  | 145895766                                                                                       | 1 | cg19700872                                                                                              | 0.38276473  | 0.323722572 | 0.218283155 | -0.164481575 | 3.96E-08    | 4.92E-07    |
| TSS200 | GPR152 | 11 | 67220223/6722026<br>3/67220318                                                                  | 3 | cg00587613/cg12145<br>564/cg27265307                                                                    | 0.833516395 | 0.717543544 | 0.680730945 | -0.15278545  | 2.83E-06    | 2.14E-05    |
| TSS200 | GPR26  | 10 | 125425690/125425<br>688/125425692                                                               | 3 | cg04549162/cg11893<br>763/cg26047950                                                                    | 0.338052003 | 0.407872328 | 0.530995215 | 0.192943212  | 3.02E-08    | 3.88E-07    |
| TSS200 | GPR6   | 6  | 110300233/110300<br>218/110300101/110<br>300146/110300099                                       | 5 | cg01261007/cg01769<br>232/cg05756933/cg1<br>2800028/cg15381304                                          | 0.391339138 | 0.407526868 | 0.563711615 | 0.172372477  | 5.17E-06    | 3.65E-05    |
| TSS200 | GPR75  | 2  | 54087200/5408717<br>3/54087178/540872<br>09/54087189/54087<br>184                               | 6 | cg00701946/cg05414<br>908/cg08611810/cg1<br>2451530/cg13356253<br>/cg19878627                           | 0.592243067 | 0.708420354 | 0.827794662 | 0.235551595  | 6.99E-14    | 5.51E-11    |
| TSS200 | GPR83  | 11 | 94134666/9413473<br>2/94134739/941347<br>56/94134646                                            | 5 | cg05374654/cg09891<br>129/cg22638597/cg2<br>3739994/cg27634151                                          | 0.259935851 | 0.342202788 | 0.491914985 | 0.231979134  | 1.45E-07    | 1.51E-06    |
| TSS200 | GPR85  | 7  | 112726659/112726<br>653/112726547/112<br>727914/112726538/<br>112726549/112726<br>541/112726396 | 8 | cg01491795/cg03119<br>639/cg06931815/cg0<br>9506675/cg13251269<br>/cg20019019/cg2051<br>3548/cg24310431 | 0.189850148 | 0.254072383 | 0.344976102 | 0.155125954  | 0.000702846 | 0.003003571 |
| TSS200 | GPR87  | 3  | 151034669                                                                                       | 1 | cg09432154                                                                                              | 0.47921643  | 0.334064389 | 0.234356582 | -0.244859848 | 6.69E-13    | 1.88E-10    |
| TSS200 | GPR88  | 1  | 101003688/101003<br>634                                                                         | 2 | cg06223162/cg09408<br>571                                                                               | 0.567033713 | 0.495271725 | 0.383171809 | -0.183861903 | 6.48E-08    | 7.54E-07    |
| TSS200 | GPSM1  | 9  | 139247374                                                                                       | 1 | cg14040131                                                                                              | 0.64215983  | 0.381567561 | 0.278549441 | -0.363610389 | 2.58E-09    | 4.87E-08    |
| TSS200 | GPX7   | 1  | 53067965/5306789<br>4                                                                           | 2 | cg11953272/cg22129<br>364                                                                               | 0.146971405 | 0.191489454 | 0.313742583 | 0.166771178  | 0.000167401 | 0.00082647  |

|        |        |    |                                                                                                               |    |                                                                                                                          |             |             |             |              |             |             |
|--------|--------|----|---------------------------------------------------------------------------------------------------------------|----|--------------------------------------------------------------------------------------------------------------------------|-------------|-------------|-------------|--------------|-------------|-------------|
| TSS200 | GREB1  | 2  | 11674057/11680057/11680020/11679879                                                                           | 4  | cg02584498/cg03877677/cg11534680/cg14653284                                                                              | 0.483677323 | 0.381441526 | 0.311466058 | -0.172211266 | 1.29E-11    | 1.00E-09    |
| TSS200 | GRIA2  | 4  | 158141570/158141542                                                                                           | 2  | cg00699993/cg10410142                                                                                                    | 0.399915025 | 0.481114561 | 0.637241957 | 0.237326932  | 3.95E-12    | 4.83E-10    |
| TSS200 | GRIA4  | 11 | 105481306/105481317/105481319/105481322/105480771/105480788/105480790/105481283/105481406/105481292/105480792 | 11 | cg00343633/cg03225817/cg04747226/cg07972135/cg09147777/cg11308643/cg12754421/cg15603568/cg21217024/cg23559689/cg23676682 | 0.303668483 | 0.408511226 | 0.583959483 | 0.280291001  | 8.01E-08    | 9.05E-07    |
| TSS200 | GRIK1  | 21 | 31312333/31312328                                                                                             | 2  | cg07950000/cg21816539                                                                                                    | 0.293747293 | 0.373807092 | 0.490491752 | 0.19674446   | 1.14E-07    | 1.23E-06    |
| TSS200 | GRIK2  | 6  | 101846805/101846791/101846797/101846707/101846779/101846767                                                   | 6  | cg05942459/cg06247406/cg13080565/cg16009558/cg22541254/cg24753760                                                        | 0.431177119 | 0.544488494 | 0.638849685 | 0.207672566  | 1.67E-08    | 2.32E-07    |
| TSS200 | GRIN2A | 16 | 10276375/10276092/10275934/10276383/10276674/10276081/10276799/10276119                                       | 8  | cg00287829/cg02585344/cg05406943/cg06758670/cg07642043/cg09461286/cg16368442/cg16904585                                  | 0.151818985 | 0.213582708 | 0.351725017 | 0.199906032  | 9.21E-07    | 7.91E-06    |
| TSS200 | GRM6   | 5  | 178422128/17842260/178422244/178422140                                                                        | 4  | cg00582971/cg01281157/cg14859460/cg19806642                                                                              | 0.487445315 | 0.579523385 | 0.705797465 | 0.21835215   | 7.25E-11    | 3.14E-09    |
| TSS200 | GRM7   | 3  | 6902689                                                                                                       | 1  | cg24213507                                                                                                               | 0.21921605  | 0.296931333 | 0.473498077 | 0.254282027  | 6.76E-06    | 4.65E-05    |
| TSS200 | GRP    | 18 | 56887279/56887320/56887351/56887310/56887271                                                                  | 5  | cg03563308/cg12927990/cg15108347/cg24131595/cg26460471                                                                   | 0.273055189 | 0.364582398 | 0.473771942 | 0.200716753  | 7.56E-09    | 1.20E-07    |
| TSS200 | GRXCR1 | 4  | 42895240                                                                                                      | 1  | cg10469791                                                                                                               | 0.37041938  | 0.2781758   | 0.200581791 | -0.169837589 | 1.30E-13    | 7.29E-11    |
| TSS200 | GSC2   | 22 | 19137968/19137874                                                                                             | 2  | cg06695663/cg23774356                                                                                                    | 0.33885151  | 0.429404128 | 0.559446507 | 0.220594997  | 4.94E-10    | 1.29E-08    |
| TSS200 | GSTM2  | 1  | 110210641/110210444                                                                                           | 2  | cg02337836/cg20676696                                                                                                    | 0.188026501 | 0.32030378  | 0.457824632 | 0.269798132  | 8.29E-08    | 9.32E-07    |
| TSS200 | GSX1   | 13 | 28366645/28366600/28366759/28366598/28366606/28366702                                                         | 6  | cg03388293/cg05344430/cg10071824/cg11354629/cg14168923/cg17369527                                                        | 0.279743824 | 0.309918543 | 0.464428891 | 0.184685067  | 0.000183473 | 0.000896833 |
| TSS200 | GUCA1C | 3  | 108672872                                                                                                     | 1  | cg19812613                                                                                                               | 0.80017399  | 0.653651272 | 0.582884532 | -0.217289458 | 1.37E-07    | 1.44E-06    |

|        |          |    |                                                           |   |                                                                |             |             |             |              |             |             |
|--------|----------|----|-----------------------------------------------------------|---|----------------------------------------------------------------|-------------|-------------|-------------|--------------|-------------|-------------|
| TSS200 | GUCA2A   | 1  | 42630526/4263043<br>6/42630567                            | 3 | cg09212118/cg13452<br>215/cg17739643                           | 0.45055423  | 0.364540715 | 0.297038814 | -0.153515416 | 2.17E-10    | 6.81E-09    |
| TSS200 | GUCY1A2  | 11 | 106889320/106889<br>329/106889318/106<br>889364/106889334 | 5 | cg02989669/cg12243<br>375/cg15847198/cg2<br>0905516/cg25918303 | 0.078953429 | 0.122064987 | 0.326497579 | 0.24754415   | 0.000268944 | 0.001264454 |
| TSS200 | GUCY1B3  | 4  | 156680007/156680<br>050/156680029                         | 3 | cg04040095/cg08358<br>983/cg18129755                           | 0.442044198 | 0.527887006 | 0.656646489 | 0.214602291  | 5.94E-09    | 9.79E-08    |
| TSS200 | GYPC     | 2  | 127413530/127413<br>505                                   | 2 | cg00014112/cg04453<br>971                                      | 0.29059013  | 0.379654733 | 0.489831673 | 0.199241543  | 1.76E-07    | 1.79E-06    |
| TSS200 | HAO1     | 20 | 7921280                                                   | 1 | cg19201723                                                     | 0.544532915 | 0.42124845  | 0.334135936 | -0.210396979 | 7.66E-12    | 7.03E-10    |
| TSS200 | HAS1     | 19 | 52227357/5222734<br>8/52227309                            | 3 | cg06785213/cg10807<br>260/cg17657179                           | 0.31371506  | 0.374843465 | 0.471854998 | 0.158139938  | 3.58E-05    | 0.000205091 |
| TSS200 | HBBP1    | 11 | 5265008                                                   | 1 | cg05133853                                                     | 0.369525795 | 0.2611101   | 0.178725934 | -0.190799861 | 1.23E-08    | 1.81E-07    |
| TSS200 | HBM      | 16 | 215845/215960/215<br>791/215781/215864                    | 5 | cg01558909/cg06319<br>822/cg08393070/cg0<br>9812623/cg26540367 | 0.162495193 | 0.220721911 | 0.344256486 | 0.181761293  | 0.000652031 | 0.002803127 |
| TSS200 | HECW1    | 7  | 43152125/4315202<br>1                                     | 2 | cg03004999/cg13298<br>841                                      | 0.254652345 | 0.296185131 | 0.465199643 | 0.210547298  | 4.68E-06    | 3.35E-05    |
| TSS200 | HES3     | 1  | 6304199/6304220/6<br>304217                               | 3 | cg00765655/cg19743<br>103/cg20157525                           | 0.277954863 | 0.37617282  | 0.44550905  | 0.167554187  | 0.000390838 | 0.001763914 |
| TSS200 | HHLA2    | 3  | 108021214/108021<br>293                                   | 2 | cg10431989/cg22926<br>869                                      | 0.72711398  | 0.648615889 | 0.570291477 | -0.156822503 | 0.000483954 | 0.002146082 |
| TSS200 | HIC1     | 17 | 1958206/1959596/1<br>958237                               | 3 | cg02756676/cg20664<br>636/cg25053531                           | 0.119704759 | 0.207886952 | 0.294555484 | 0.174850725  | 5.35E-07    | 4.83E-06    |
| TSS200 | HIST1H4F | 6  | 26240505/2624057<br>9/26240519/262405<br>28               | 4 | cg00436476/cg05159<br>188/cg12260798/cg2<br>2723502            | 0.382213723 | 0.497467678 | 0.589769416 | 0.207555693  | 3.61E-08    | 4.56E-07    |
| TSS200 | HKR1     | 19 | 37825388/3782544<br>6/37825406                            | 3 | cg05280698/cg12948<br>621/cg24834889                           | 0.416202347 | 0.530739537 | 0.568308579 | 0.152106232  | 0.002551275 | 0.009682565 |
| TSS200 | HMX2     | 10 | 124907600/124907<br>540/124907553/124<br>907457           | 4 | cg07229938/cg17498<br>296/cg22603247/cg2<br>3437459            | 0.107673106 | 0.17093666  | 0.261057942 | 0.153384836  | 0.000412741 | 0.001855336 |
| TSS200 | HNF1A    | 12 | 121416512/121416<br>547/121416390/121<br>416510/121416501 | 5 | cg01341572/cg01394<br>199/cg05934698/cg0<br>6444781/cg14996810 | 0.562732005 | 0.487819969 | 0.408070226 | -0.154661779 | 3.82E-09    | 6.83E-08    |



|        |          |    |                                                                                                    |                                                                                                                        |             |             |             |              |             |             |
|--------|----------|----|----------------------------------------------------------------------------------------------------|------------------------------------------------------------------------------------------------------------------------|-------------|-------------|-------------|--------------|-------------|-------------|
| TSS200 | HNFA4    | 20 | 43029895/4298432<br>0/42984324/430297<br>32/42984394/42984 9<br>338/42984347/4298<br>4276/43029777 | cg03862380/cg06126<br>829/cg06640637/cg0<br>7006673/cg16221969<br>/cg20848979/cg2295<br>8104/cg24084358/cg<br>27420224 | 0.533742603 | 0.440728555 | 0.354330681 | -0.179411922 | 7.82E-11    | 3.27E-09    |
| TSS200 | HOXA2    | 7  | 27142547/2714252<br>7/27142535/271424 5<br>27/27142437                                             | cg02979457/cg05921<br>905/cg06769202/cg2<br>3979631/cg24058604                                                         | 0.268984518 | 0.406471907 | 0.543246351 | 0.274261833  | 2.19E-05    | 0.000132812 |
| TSS200 | HOXA6    | 7  | 27187502/2718737<br>2/27187374/271875 6<br>60/27187556/27187<br>553                                | cg03529432/cg04265<br>576/cg12810523/cg1<br>4044640/cg17994139<br>/cg22469274                                          | 0.156703575 | 0.246488623 | 0.317372508 | 0.160668933  | 0.004413667 | 0.015774959 |
| TSS200 | HOXB6    | 17 | 46682398/4668239<br>0/46682394/466824 4<br>13                                                      | cg02574073/cg10906<br>729/cg18684142/cg1<br>9828220                                                                    | 0.480171541 | 0.362185738 | 0.262243568 | -0.217927974 | 1.46E-10    | 5.07E-09    |
| TSS200 | HOXC10   | 12 | 54378789/5437881<br>5/54378896/543788 6<br>21/54378787/54378<br>826                                | cg03556393/cg08737<br>755/cg08900043/cg1<br>6253259/cg21623748<br>/cg25057269                                          | 0.160594537 | 0.213917573 | 0.311043306 | 0.150448769  | 0.000404926 | 0.001822283 |
| TSS200 | HOXC11   | 12 | 54366760/5436687<br>5/54366816/543668 4<br>59                                                      | cg03132556/cg06630<br>413/cg08962452/cg2<br>6386624                                                                    | 0.424190768 | 0.538414197 | 0.640461675 | 0.216270908  | 2.20E-08    | 2.96E-07    |
| TSS200 | HOXC13   | 12 | 54332463/5433250<br>1/54332530/543323 5<br>85/54332457                                             | cg01839657/cg09106<br>624/cg10961753/cg1<br>1466369/cg26283893                                                         | 0.233238621 | 0.298792299 | 0.404352779 | 0.171114158  | 4.55E-06    | 3.26E-05    |
| TSS200 | HOXC9    | 12 | 54393687/5439370 3<br>9/54393725                                                                   | cg03215137/cg13233<br>407/cg21272774                                                                                   | 0.314765248 | 0.420804026 | 0.596110945 | 0.281345697  | 1.38E-09    | 2.88E-08    |
| TSS200 | HPYR1    | 8  | 133573809/133573 2<br>739                                                                          | cg07696099/cg24627<br>900                                                                                              | 0.463879428 | 0.333557311 | 0.242673395 | -0.221206032 | 5.80E-14    | 5.04E-11    |
| TSS200 | HS3ST3A1 | 17 | 13505433 1                                                                                         | cg16861955                                                                                                             | 0.222824465 | 0.300127556 | 0.427290614 | 0.204466149  | 0.000445662 | 0.001988278 |
| TSS200 | HS3ST4   | 16 | 25703160/2570315 2<br>3                                                                            | cg24862668/cg26933<br>063                                                                                              | 0.116458718 | 0.118546268 | 0.275044375 | 0.158585657  | 0.002450276 | 0.009332947 |
| TSS200 | HSD17B2  | 16 | 82068803/8206870 2<br>2                                                                            | cg20373326/cg26479<br>028                                                                                              | 0.47452185  | 0.376815939 | 0.286402014 | -0.188119836 | 1.10E-10    | 4.16E-09    |
| TSS200 | HSD17B3  | 9  | 99064450 1                                                                                         | cg14356530                                                                                                             | 0.62764841  | 0.593422244 | 0.470116273 | -0.157532137 | 5.27E-06    | 3.70E-05    |
| TSS200 | HSF4     | 16 | 67197180/6719718<br>6/67197150/671971 4<br>29                                                      | cg05436064/cg07816<br>687/cg09030672/cg1<br>8705279                                                                    | 0.243967256 | 0.330710823 | 0.434190789 | 0.190223534  | 1.10E-09    | 2.41E-08    |
| TSS200 | HSPB3    | 5  | 53751272/5375141 2<br>1                                                                            | cg17839166/cg20169<br>062                                                                                              | 0.615868975 | 0.425499872 | 0.292604077 | -0.323264898 | 1.47E-14    | 1.93E-11    |

|        |        |    |                                                                         |   |                                                                               |             |             |             |              |          |             |
|--------|--------|----|-------------------------------------------------------------------------|---|-------------------------------------------------------------------------------|-------------|-------------|-------------|--------------|----------|-------------|
| TSS200 | HSPB9  | 17 | 40274670/4027474<br>0/40274728/402747<br>03/40274722                    | 5 | cg01501896/cg07168<br>142/cg08880849/cg1<br>6208084/cg26934993                | 0.499179343 | 0.39830171  | 0.31683343  | -0.182345913 | 1.58E-08 | 2.22E-07    |
| TSS200 | HTA    | 16 | 73126120                                                                | 1 | cg00293191                                                                    | 0.77247929  | 0.635101672 | 0.532098973 | -0.240380317 | 1.17E-11 | 9.37E-10    |
| TSS200 | HTR1A  | 5  | 63257710/6325755<br>4                                                   | 2 | cg02266732/cg04694<br>812                                                     | 0.37726663  | 0.462507822 | 0.601886391 | 0.224619761  | 1.78E-09 | 3.57E-08    |
| TSS200 | HTR1E  | 6  | 87646972/8764693<br>0/87646876/876469<br>86/87646922                    | 5 | cg00454577/cg03472<br>798/cg13748928/cg2<br>1286526/cg22141389                | 0.195128451 | 0.265592081 | 0.414021672 | 0.21889322   | 1.94E-06 | 1.54E-05    |
| TSS200 | HTR3C  | 3  | 183770677/183770<br>650                                                 | 2 | cg19233761/cg19815<br>720                                                     | 0.678129205 | 0.550280939 | 0.400421809 | -0.277707396 | 3.34E-12 | 4.48E-10    |
| TSS200 | HTR3D  | 3  | 183749212/183749<br>414/183749227/183<br>750429                         | 4 | cg00576550/cg04200<br>192/cg14483391/cg1<br>7645664                           | 0.543917035 | 0.470620147 | 0.380217845 | -0.16369919  | 1.21E-09 | 2.60E-08    |
| TSS200 | HTR5A  | 7  | 154862441/154862<br>524                                                 | 2 | cg00903099/cg20967<br>585                                                     | 0.40199582  | 0.516462503 | 0.665576832 | 0.263581012  | 1.12E-09 | 2.44E-08    |
| TSS200 | HYAL1  | 3  | 50341183/5034107<br>4/50341009/503498<br>68                             | 4 | cg06360465/cg11607<br>701/cg14943722/cg1<br>6240550                           | 0.608920143 | 0.466573292 | 0.379649527 | -0.229270615 | 2.78E-09 | 5.20E-08    |
| TSS200 | HYAL4  | 7  | 123485052/123485<br>043                                                 | 2 | cg08158805/cg13882<br>046                                                     | 0.67382397  | 0.53954895  | 0.438621732 | -0.235202238 | 2.19E-10 | 6.83E-09    |
| TSS200 | HYDIN  | 16 | 71264678/7126465<br>8/71264579                                          | 3 | cg02293437/cg09794<br>131/cg09918510                                          | 0.240958013 | 0.305490331 | 0.449993583 | 0.20903557   | 5.96E-05 | 0.000323826 |
| TSS200 | IFNA7  | 9  | 21202213                                                                | 1 | cg18403613                                                                    | 0.50355786  | 0.4263086   | 0.318881373 | -0.184676487 | 8.76E-11 | 3.55E-09    |
| TSS200 | IGF2AS | 11 | 2161586                                                                 | 1 | cg25163476                                                                    | 0.230925235 | 0.272385617 | 0.438010264 | 0.207085029  | 1.85E-05 | 0.000114554 |
| TSS200 | IGFL1  | 19 | 46732864                                                                | 1 | cg25246031                                                                    | 0.476276465 | 0.367012422 | 0.294366755 | -0.18190971  | 1.32E-14 | 1.93E-11    |
| TSS200 | IKZF1  | 7  | 50344242/5034433<br>1/50344294                                          | 3 | cg18810347/cg20078<br>466/cg27633530                                          | 0.072719946 | 0.176396283 | 0.335746248 | 0.263026302  | 2.68E-05 | 0.000158986 |
| TSS200 | IL12B  | 5  | 158757659                                                               | 1 | cg06111286                                                                    | 0.357650125 | 0.251628711 | 0.195009495 | -0.16264063  | 7.45E-10 | 1.78E-08    |
| TSS200 | IL16   | 15 | 81489160/8148907<br>5                                                   | 2 | cg08255105/cg23936<br>860                                                     | 0.545684615 | 0.474092156 | 0.378542282 | -0.167142333 | 2.65E-08 | 3.47E-07    |
| TSS200 | IL17RE | 3  | 9944183                                                                 | 1 | cg18738581                                                                    | 0.349872465 | 0.239464678 | 0.185066232 | -0.164806233 | 4.95E-13 | 1.67E-10    |
| TSS200 | IL19   | 1  | 206972130/206972<br>113                                                 | 2 | cg11582579/cg20998<br>511                                                     | 0.586337805 | 0.519033217 | 0.384996775 | -0.20134103  | 3.77E-07 | 3.53E-06    |
| TSS200 | IL1F9  | 2  | 113735451/113735<br>503                                                 | 2 | cg13298167/cg27067<br>035                                                     | 0.6037464   | 0.468935467 | 0.411721918 | -0.192024482 | 1.08E-09 | 2.37E-08    |
| TSS200 | IL1RL2 | 2  | 102803290/102803<br>407                                                 | 2 | cg15077070/cg22797<br>169                                                     | 0.475451963 | 0.433785828 | 0.324164011 | -0.151287951 | 2.33E-05 | 0.000140179 |
| TSS200 | IL20RA | 6  | 137366432/137366<br>346/137366322/137<br>366336/137366369/<br>137366492 | 6 | cg13714540/cg15992<br>935/cg22487322/cg2<br>4405068/cg26864905<br>/cg27656754 | 0.606338933 | 0.437797385 | 0.326750488 | -0.279588445 | 6.27E-11 | 2.81E-09    |

|        |          |    |                                                                                                                                                                                              |    |                                                                                                                                                                                                                                    |             |             |             |              |             |             |
|--------|----------|----|----------------------------------------------------------------------------------------------------------------------------------------------------------------------------------------------|----|------------------------------------------------------------------------------------------------------------------------------------------------------------------------------------------------------------------------------------|-------------|-------------|-------------|--------------|-------------|-------------|
| TSS200 | IL23R    | 1  | 67632028                                                                                                                                                                                     | 1  | cg07842386                                                                                                                                                                                                                         | 0.56604364  | 0.651066817 | 0.721488827 | 0.155445187  | 1.34E-09    | 2.82E-08    |
| TSS200 | IMP5     | 17 | 43922210/4392224<br>0/43922244/439221<br>22                                                                                                                                                  | 4  | cg03882071/cg08568<br>298/cg23907852/cg2<br>4515861                                                                                                                                                                                | 0.467624366 | 0.385905172 | 0.316818241 | -0.150806125 | 1.42E-10    | 4.98E-09    |
| TSS200 | INA      | 10 | 105036811/105036<br>863/105036747/105<br>036727                                                                                                                                              | 4  | cg08050235/cg17567<br>560/cg23003534/cg2<br>4680586                                                                                                                                                                                | 0.143560112 | 0.243447131 | 0.447113657 | 0.303553545  | 1.62E-06    | 1.31E-05    |
| TSS200 | INHBA    | 7  | 41742795                                                                                                                                                                                     | 1  | cg18413237                                                                                                                                                                                                                         | 0.77036114  | 0.618036522 | 0.489446836 | -0.280914304 | 1.73E-10    | 5.70E-09    |
| TSS200 | INS      | 11 | 2182540/2182457/2<br>182573/2182618                                                                                                                                                          | 4  | cg02749887/cg20254<br>598/cg21574853/cg2<br>5336198                                                                                                                                                                                | 0.603619085 | 0.525042196 | 0.43354588  | -0.170073205 | 5.20E-09    | 8.78E-08    |
| TSS200 | INS-IGF2 | 11 | 2182540/2182457/2<br>182573/2182618                                                                                                                                                          | 4  | cg02749887/cg20254<br>598/cg21574853/cg2<br>5336198                                                                                                                                                                                | 0.603619085 | 0.525042196 | 0.43354588  | -0.170073205 | 5.20E-09    | 8.78E-08    |
| TSS200 | INSC     | 11 | 15133828/1513645<br>6/15136475/151363<br>45/15136380/15136<br>376                                                                                                                            | 6  | cg01223673/cg02434<br>443/cg13997645/cg2<br>2792646/cg23463269<br>/cg23930945                                                                                                                                                      | 0.264872593 | 0.326389709 | 0.419956715 | 0.155084122  | 0.002654428 | 0.010013797 |
| TSS200 | INSL5    | 1  | 67267129                                                                                                                                                                                     | 1  | cg02120470                                                                                                                                                                                                                         | 0.60222788  | 0.478791589 | 0.369967527 | -0.232260353 | 2.30E-11    | 1.46E-09    |
| TSS200 | IRAK3    | 12 | 66582780/6658280<br>5                                                                                                                                                                        | 2  | cg20395892/cg26279<br>550                                                                                                                                                                                                          | 0.330652861 | 0.392081044 | 0.569845831 | 0.23919297   | 3.30E-07    | 3.14E-06    |
| TSS200 | IRF4     | 6  | 391680/391743/391<br>683/391664                                                                                                                                                              | 4  | cg03410961/cg05766<br>140/cg16046028/cg1<br>6643840                                                                                                                                                                                | 0.082199335 | 0.178686749 | 0.337683454 | 0.255484119  | 3.31E-06    | 2.46E-05    |
| TSS200 | IRX4     | 5  | 1883011/1882952/1<br>883005/1882885/18<br>82900/1882902                                                                                                                                      | 6  | cg02641288/cg07368<br>937/cg07882671/cg1<br>4507560/cg23620282<br>/cg24937747                                                                                                                                                      | 0.397676793 | 0.493791531 | 0.598395711 | 0.200718919  | 2.17E-05    | 0.000131991 |
| TSS200 | IRX6     | 16 | 55358461/5535845<br>8                                                                                                                                                                        | 2  | cg04853843/cg10250<br>663                                                                                                                                                                                                          | 0.30543853  | 0.370463272 | 0.465869659 | 0.160431129  | 1.01E-05    | 6.60E-05    |
| TSS200 | ISLR2    | 15 | 74421535/7442193<br>5/74421635/744215<br>23/74422528/74421<br>857/74421584/7442<br>1848/74422632/744<br>21887/74422572/74<br>422629/74422550/7<br>4422545/74421918/<br>74421531/7442190<br>9 | 17 | cg00781110/cg02709<br>205/cg04920649/cg0<br>5547902/cg05923854<br>/cg06041677/cg0791<br>7269/cg08703540/cg<br>10070260/cg1201791<br>1/cg18887483/cg233<br>92501/cg24123518/c<br>g24653100/cg257055<br>58/cg25828462/cg27<br>200833 | 0.243653318 | 0.282673849 | 0.425638663 | 0.181985345  | 2.75E-06    | 2.09E-05    |

|        |         |    |                                                       |   |                                                                   |             |             |             |              |             |             |
|--------|---------|----|-------------------------------------------------------|---|-------------------------------------------------------------------|-------------|-------------|-------------|--------------|-------------|-------------|
| TSS200 | ITGA4   | 2  | 182321496/182321489                                   | 2 | cg10965575/cg17265419                                             | 0.338721798 | 0.454148258 | 0.526380743 | 0.187658946  | 1.50E-06    | 1.22E-05    |
| TSS200 | ITGA8   | 10 | 15761869/15761881/15761854/15761876                   | 4 | cg07073391/cg16422098/cg19944763/cg25825488                       | 0.261845831 | 0.379988305 | 0.523987721 | 0.262141891  | 4.16E-06    | 3.01E-05    |
| TSS200 | ITGB6   | 2  | 161056600/161056639                                   | 2 | cg07896068/cg18437633                                             | 0.627600435 | 0.488388908 | 0.385050082 | -0.242550353 | 1.12E-11    | 9.12E-10    |
| TSS200 | ITIH2   | 10 | 7745191                                               | 1 | cg064440087                                                       | 0.62501054  | 0.528964628 | 0.417236995 | -0.207773545 | 1.50E-08    | 2.12E-07    |
| TSS200 | ITIH4   | 3  | 52864907/52864812/52864816                            | 3 | cg05721858/cg07095346/cg17890764                                  | 0.49948116  | 0.385902778 | 0.3157466   | -0.18373456  | 3.89E-10    | 1.07E-08    |
| TSS200 | IYD     | 6  | 150689918                                             | 1 | cg22804839                                                        | 0.517396385 | 0.382214878 | 0.28541745  | -0.231978935 | 1.46E-11    | 1.10E-09    |
| TSS200 | IZUMO1  | 19 | 49250252/49250180                                     | 2 | cg15085603/cg16732175                                             | 0.124496334 | 0.157671631 | 0.313989755 | 0.189493422  | 1.07E-05    | 6.97E-05    |
| TSS200 | JAKMIP1 | 4  | 6202381/6202384/6202379                               | 3 | cg08073882/cg10748160/cg13168683                                  | 0.054793405 | 0.126586193 | 0.228282325 | 0.17348892   | 0.000834965 | 0.003516711 |
| TSS200 | JAM2    | 21 | 27011462/27011480/27011482/27011436                   | 4 | cg05504541/cg06716684/cg16532755/cg21042970                       | 0.063294654 | 0.167859389 | 0.226439507 | 0.163144853  | 0.000323032 | 0.001489443 |
| TSS200 | JAM3    | 11 | 133938788/133938676/133938757/133938810               | 4 | cg03637878/cg19055936/cg24140030/cg24899571                       | 0.146781501 | 0.214326459 | 0.413833505 | 0.267052004  | 7.01E-08    | 8.09E-07    |
| TSS200 | KATNAL2 | 18 | 44526756/44526707/44526700/44526605/44526743          | 5 | cg05498007/cg06198398/cg12171183/cg19558029/cg20469799            | 0.087198262 | 0.169967627 | 0.289067493 | 0.201869231  | 0.000244602 | 0.001162485 |
| TSS200 | KCNA1   | 12 | 5019017/5019004/5019066/5018984/5019024               | 5 | cg03929977/cg10569606/cg10767336/cg12080391/cg15543616            | 0.181326338 | 0.291514145 | 0.499834589 | 0.318508251  | 6.31E-10    | 1.56E-08    |
| TSS200 | KCNA3   | 1  | 111217691/11121712/111217715/111217785                | 4 | cg06750832/cg07808555/cg09410234/cg26071016                       | 0.25023847  | 0.437710297 | 0.609975493 | 0.359737024  | 1.26E-12    | 2.41E-10    |
| TSS200 | KCNA4   | 11 | 30038685/30038675/30038615/30038672/30038677/30038619 | 6 | cg05756220/cg08490115/cg10387551/cg15044957/cg15310492/cg17714025 | 0.424733574 | 0.488604048 | 0.597385488 | 0.172651914  | 1.74E-08    | 2.41E-07    |
| TSS200 | KCNA5   | 12 | 5153054                                               | 1 | cg17653824                                                        | 0.276973885 | 0.3924915   | 0.480052273 | 0.203078388  | 4.48E-08    | 5.48E-07    |
| TSS200 | KCNC1   | 11 | 17757415/17757342                                     | 2 | cg00413617/cg19947104                                             | 0.477201608 | 0.544435308 | 0.676659805 | 0.199458197  | 2.63E-11    | 1.54E-09    |
| TSS200 | KCNE2   | 21 | 35736252                                              | 1 | cg14127954                                                        | 0.47691791  | 0.378690722 | 0.305793614 | -0.171124296 | 8.56E-11    | 3.50E-09    |

|        |          |    |                                                                                                                 |                                                                                                                        |             |             |             |              |          |          |
|--------|----------|----|-----------------------------------------------------------------------------------------------------------------|------------------------------------------------------------------------------------------------------------------------|-------------|-------------|-------------|--------------|----------|----------|
| TSS200 | KCNIP1   | 5  | 169930938/169930<br>870/169780747/169<br>930919/169930879/ 7<br>169930905/169780<br>772                         | cg04248157/cg08360<br>721/cg10608615/cg1<br>1782635/cg15124711<br>/cg15713707/cg2246<br>4105                           | 0.411386769 | 0.46655677  | 0.567726992 | 0.156340223  | 4.95E-06 | 3.51E-05 |
| TSS200 | KCNJ1    | 11 | 128712399/128737<br>467/128737463/128<br>737429/128737415/<br>128737319/128712 9<br>462/128712417/128<br>737300 | cg07713705/cg10280<br>034/cg12408998/cg1<br>3267718/cg13675753<br>/cg14481339/cg2096<br>2532/cg25194720/cg<br>27056194 | 0.762149996 | 0.710318675 | 0.608141639 | -0.154008358 | 9.57E-07 | 8.20E-06 |
| TSS200 | KCNK12   | 2  | 47797488/4779756 3<br>9/47797590                                                                                | cg03603951/cg04431<br>946/cg08074851                                                                                   | 0.245250457 | 0.372603034 | 0.554110771 | 0.308860313  | 1.09E-10 | 4.14E-09 |
| TSS200 | KCNK16   | 6  | 39290478/3929034<br>2/39290526/392904 4<br>15                                                                   | cg05897803/cg06543<br>101/cg07970874/cg1<br>8754335                                                                    | 0.655187386 | 0.547124025 | 0.41851878  | -0.236668607 | 8.05E-12 | 7.13E-10 |
| TSS200 | KCNMB1   | 5  | 169816792 1                                                                                                     | cg22646937                                                                                                             | 0.469126495 | 0.390604461 | 0.312520409 | -0.156606086 | 4.58E-11 | 2.23E-09 |
| TSS200 | KCNQ5    | 6  | 73331405 1                                                                                                      | cg00852573                                                                                                             | 0.236188001 | 0.456947117 | 0.638643491 | 0.40245549   | 4.26E-12 | 5.02E-10 |
| TSS200 | KDR      | 4  | 55991860/5599178<br>2/55991850/559919 6<br>43/55991824/55991<br>818                                             | cg00989765/cg07893<br>544/cg11505338/cg1<br>4323109/cg18177533<br>/cg21161891                                          | 0.298562403 | 0.408836202 | 0.557840105 | 0.259277702  | 8.90E-07 | 7.66E-06 |
| TSS200 | KHDC1L   | 6  | 73935200/7393527 2<br>0                                                                                         | cg19565171/cg24543<br>552                                                                                              | 0.6973452   | 0.536029308 | 0.394430645 | -0.302914555 | 3.99E-12 | 4.85E-10 |
| TSS200 | KHDRBS2  | 6  | 62996132/6299629<br>9/62996183/629962 6<br>14/62996130/62996<br>119                                             | cg03656899/cg11315<br>153/cg18134312/cg1<br>8884037/cg22014661<br>/cg26715952                                          | 0.292970528 | 0.420608942 | 0.557564465 | 0.264593937  | 8.12E-08 | 9.16E-07 |
| TSS200 | KIAA1217 | 10 | 23983538/2398353<br>4/24497713/239834 5<br>98/23983496                                                          | cg08539841/cg08704<br>681/cg11502597/cg1<br>3882278/cg24487076                                                         | 0.146130786 | 0.19490086  | 0.31299218  | 0.166861394  | 5.58E-07 | 5.03E-06 |
| TSS200 | KIAA1644 | 22 | 44708843/4470876<br>1/44708861/447087 5<br>94/44708908                                                          | cg02687592/cg19189<br>176/cg22866759/cg2<br>3509574/cg25466154                                                         | 0.79957062  | 0.721569567 | 0.648987805 | -0.150582815 | 4.28E-09 | 7.52E-08 |
| TSS200 | KIAA1683 | 19 | 18385502/1838540 2<br>9                                                                                         | cg01087239/cg24782<br>497                                                                                              | 0.408123373 | 0.307092547 | 0.255588084 | -0.152535288 | 1.24E-09 | 2.66E-08 |
| TSS200 | KLB      | 4  | 39408418/3940841 2<br>6                                                                                         | cg22953731/cg25064<br>910                                                                                              | 0.59930657  | 0.485325792 | 0.380033184 | -0.219273386 | 1.03E-10 | 3.98E-09 |

|        |           |    |                                                      |   |                                                                |             |             |             |              |          |            |
|--------|-----------|----|------------------------------------------------------|---|----------------------------------------------------------------|-------------|-------------|-------------|--------------|----------|------------|
| TSS200 | KLF17     | 1  | 44584446/4458435<br>0/44584429/445845<br>18/44584417 | 5 | cg04877567/cg08679<br>985/cg16903122/cg2<br>0243285/cg21864563 | 0.94874659  | 0.825052944 | 0.675926584 | -0.272820006 | 4.49E-07 | 4.12E-06   |
| TSS200 | KRT1      | 12 | 53074328/5307431<br>3/53074257                       | 3 | cg10538533/cg10926<br>148/cg17405586                           | 0.546406978 | 0.480530731 | 0.382627048 | -0.16377993  | 4.71E-09 | 8.13E-08   |
| TSS200 | KRT16     | 17 | 39769175/3976921<br>3                                | 2 | cg13179549/cg26336<br>935                                      | 0.5766012   | 0.468799861 | 0.385048595 | -0.191552605 | 4.52E-09 | 7.93E-08   |
| TSS200 | KRT20     | 17 | 39041602                                             | 1 | cg00091693                                                     | 0.654840195 | 0.478480711 | 0.349085609 | -0.305754586 | 2.09E-11 | 1.37E-09   |
| TSS200 | KRT24     | 17 | 38860042/3886009<br>7                                | 2 | cg04219544/cg23737<br>768                                      | 0.50982608  | 0.392596294 | 0.299409282 | -0.210416798 | 1.13E-11 | 9.19E-10   |
| TSS200 | KRT28     | 17 | 38956362                                             | 1 | cg07008343                                                     | 0.659471165 | 0.557694322 | 0.428230009 | -0.231241156 | 2.33E-06 | 1.81E-05   |
| TSS200 | KRT31     | 17 | 39553960                                             | 1 | cg11473240                                                     | 0.526746535 | 0.409767844 | 0.335885514 | -0.190861021 | 5.84E-07 | 5.24E-06   |
| TSS200 | KRT37     | 17 | 39580880                                             | 1 | cg15059743                                                     | 0.565611215 | 0.451885111 | 0.385385923 | -0.180225292 | 6.82E-09 | 1.10E-07   |
| TSS200 | KRT6A     | 12 | 52887263                                             | 1 | cg03462053                                                     | 0.803110855 | 0.653543944 | 0.517739759 | -0.285371096 | 4.62E-09 | 8.03E-08   |
| TSS200 | KRT6B     | 12 | 52845930/5284607<br>3/52845938/528460<br>88          | 4 | cg02068361/cg11601<br>375/cg12795208/cg1<br>3221107            | 0.60088502  | 0.399430506 | 0.348907464 | -0.251977556 | 1.19E-08 | 1.75E-07   |
| TSS200 | KRT7      | 12 | 52626831/5262681<br>4/52626818/526268<br>89/52626904 | 5 | cg07007400/cg07967<br>679/cg08975803/cg1<br>4482313/cg14537533 | 0.505103519 | 0.599367097 | 0.707058041 | 0.201954522  | 8.84E-10 | 2.04E-08   |
| TSS200 | KRT71     | 12 | 52947004                                             | 1 | cg05358758                                                     | 0.601289135 | 0.413676656 | 0.312331736 | -0.288957399 | 9.54E-10 | 2.17E-08   |
| TSS200 | KRT8      | 12 | 53298911/5329888<br>8                                | 2 | cg03327403/cg21340<br>733                                      | 0.480000408 | 0.384279567 | 0.303229127 | -0.17677128  | 1.10E-09 | 2.42E-08   |
| TSS200 | KRT80     | 12 | 52585844/5258578<br>6/52585849/525858<br>92          | 4 | cg00280812/cg04472<br>592/cg20225745/cg2<br>4174145            | 0.425115458 | 0.329014435 | 0.259179361 | -0.165936098 | 7.59E-11 | 3.23E-09   |
| TSS200 | KRTAP1-1  | 17 | 39197721                                             | 1 | cg02022375                                                     | 0.650459885 | 0.513534644 | 0.430641918 | -0.219817967 | 1.72E-09 | 3.46E-08   |
| TSS200 | KRTAP11-1 | 21 | 32253964                                             | 1 | cg22643217                                                     | 0.67525976  | 0.623237167 | 0.507881595 | -0.167378165 | 1.16E-05 | 7.53E-05   |
| TSS200 | KRTAP12-1 | 21 | 46102242                                             | 1 | cg06683078                                                     | 0.395013455 | 0.304620194 | 0.231999136 | -0.163014319 | 7.09E-10 | 1.71E-08   |
| TSS200 | KRTAP12-2 | 21 | 46087026/4608685<br>5                                | 2 | cg08152198/cg22347<br>126                                      | 0.43836179  | 0.344599533 | 0.260349341 | -0.178012449 | 1.11E-10 | 4.21E-09   |
| TSS200 | KRTAP12-4 | 21 | 46074616                                             | 1 | cg07018760                                                     | 0.61169551  | 0.5075375   | 0.410091464 | -0.201604046 | 6.53E-07 | 5.78E-06   |
| TSS200 | KRTAP13-1 | 21 | 31768311/3176831<br>9                                | 2 | cg02764897/cg26740<br>230                                      | 0.502679203 | 0.405289803 | 0.283117902 | -0.2195613   | 4.79E-13 | 1.67E-10   |
| TSS200 | KRTAP13-3 | 21 | 31798236                                             | 1 | cg06468780                                                     | 0.74166367  | 0.704265667 | 0.581097995 | -0.160565675 | 1.62E-05 | 0.00010147 |
| TSS200 | KRTAP19-1 | 21 | 31852793                                             | 1 | cg13139843                                                     | 0.48232829  | 0.364093794 | 0.285575118 | -0.196753172 | 1.13E-12 | 2.34E-10   |
| TSS200 | KRTAP19-5 | 21 | 31874502                                             | 1 | cg14054990                                                     | 0.53858839  | 0.410367172 | 0.260509864 | -0.278078526 | 3.49E-15 | 1.23E-11   |
| TSS200 | KRTAP25-1 | 21 | 31661998                                             | 1 | cg24145481                                                     | 0.55644044  | 0.397667394 | 0.302504641 | -0.253935799 | 1.12E-15 | 8.86E-12   |
| TSS200 | KRTAP3-1  | 17 | 39165425                                             | 1 | cg24833464                                                     | 0.693517695 | 0.625774083 | 0.5305573   | -0.162960395 | 2.54E-07 | 2.49E-06   |

|        |          |    |                                                                       |   |                                                                              |             |             |             |              |             |             |
|--------|----------|----|-----------------------------------------------------------------------|---|------------------------------------------------------------------------------|-------------|-------------|-------------|--------------|-------------|-------------|
| TSS200 | KRTAP4-7 | 17 | 39240343                                                              | 1 | cg16090541                                                                   | 0.595406955 | 0.489856633 | 0.416410586 | -0.178996369 | 2.11E-09    | 4.10E-08    |
| TSS200 | KRTAP4-8 | 17 | 39254427/39254439                                                     | 2 | cg12981595/cg20663846                                                        | 0.55585559  | 0.403320633 | 0.297085225 | -0.258770365 | 1.76E-12    | 2.96E-10    |
| TSS200 | KRTAP9-4 | 17 | 39405817                                                              | 1 | cg00550617                                                                   | 0.43807172  | 0.345016444 | 0.280069459 | -0.158002261 | 5.49E-12    | 5.68E-10    |
| TSS200 | KRTDAP   | 19 | 35981371/35981517/35981531/35981549                                   | 4 | cg00083616/cg01585096/cg22802461/cg25717032                                  | 0.685287755 | 0.603508197 | 0.522446325 | -0.16284143  | 4.88E-07    | 4.44E-06    |
| TSS200 | KY       | 3  | 134369974/134369919/134369987/134370015/134369939/134370046           | 6 | cg00060320/cg00329270/cg12307306/cg12573071/cg22889573/cg24370755            | 0.191735639 | 0.235910166 | 0.342388241 | 0.150652603  | 0.000778042 | 0.003297219 |
| TSS200 | L1TD1    | 1  | 62660421/62660281                                                     | 2 | cg14254748/cg27300647                                                        | 0.605336813 | 0.443143486 | 0.360132848 | -0.245203965 | 2.95E-12    | 4.35E-10    |
| TSS200 | LACRT    | 12 | 55028756                                                              | 1 | cg26218982                                                                   | 0.773553815 | 0.658598289 | 0.547215936 | -0.226337879 | 3.39E-08    | 4.30E-07    |
| TSS200 | LAMB3    | 1  | 209825856/209825747/209825943/209825849/209824825/209825678/209825731 | 7 | cg01580568/cg03977657/cg04873061/cg19709585/cg20416769/cg22502856/cg26533764 | 0.588906464 | 0.475318851 | 0.39392389  | -0.194982574 | 1.06E-10    | 4.07E-09    |
| TSS200 | LAYN     | 11 | 111411071/111411199/111411176/111411216/111411076                     | 5 | cg04226536/cg06459000/cg12506005/cg19820372/cg21703322                       | 0.162957659 | 0.248335517 | 0.33857091  | 0.175613251  | 8.20E-05    | 0.000432874 |
| TSS200 | LCE1F    | 1  | 152748838                                                             | 1 | cg01915081                                                                   | 0.657349355 | 0.581917528 | 0.429483991 | -0.227865364 | 6.97E-10    | 1.68E-08    |
| TSS200 | LCE2A    | 1  | 152670764                                                             | 1 | cg13705774                                                                   | 0.726300065 | 0.651140572 | 0.528898373 | -0.197401692 | 1.14E-07    | 1.23E-06    |
| TSS200 | LCN2     | 9  | 130911577                                                             | 1 | cg14615559                                                                   | 0.486324855 | 0.365967717 | 0.272160432 | -0.214164423 | 6.60E-11    | 2.90E-09    |
| TSS200 | LDHD     | 16 | 75150819/75150833/75150799/75150784/75150744                          | 5 | cg03085549/cg03743982/cg09899215/cg16540789/cg24429836                       | 0.442058635 | 0.348694067 | 0.274865191 | -0.167193444 | 1.75E-08    | 2.41E-07    |
| TSS200 | LEAP2    | 5  | 132209201                                                             | 1 | cg11397957                                                                   | 0.543176875 | 0.42993275  | 0.329382123 | -0.213794752 | 2.20E-11    | 1.42E-09    |
| TSS200 | LHCGR    | 2  | 48982957/48982950                                                     | 2 | cg12351433/cg19403014                                                        | 0.385139748 | 0.376765842 | 0.550063805 | 0.164924057  | 6.61E-05    | 0.000354875 |
| TSS200 | LHX1     | 17 | 35294472/35294476/35294481/35294491                                   | 4 | cg04993975/cg05527869/cg10043865/cg10356613                                  | 0.139836631 | 0.200465452 | 0.3048517   | 0.16501507   | 0.012437651 | 0.039446767 |
| TSS200 | LHX5     | 12 | 113909934/11390993/113910012/113909932/113909948/113910034            | 6 | cg02328332/cg06198190/cg08745498/cg09432902/cg14868703/cg23497704            | 0.228372586 | 0.284207649 | 0.37891423  | 0.150541644  | 0.000200821 | 0.000973187 |
| TSS200 | LHX8     | 1  | 75594016/75594053/75594066                                            | 3 | cg01185626/cg09222749/cg26688527                                             | 0.288953108 | 0.396863354 | 0.514879792 | 0.225926684  | 2.14E-07    | 2.13E-06    |

|        |              |    |                                                                            |                                                                                              |             |             |             |              |            |             |
|--------|--------------|----|----------------------------------------------------------------------------|----------------------------------------------------------------------------------------------|-------------|-------------|-------------|--------------|------------|-------------|
| TSS200 | LIN28        | 1  | 26737116/2673724<br>7/26737262/267371 4<br>99                              | cg07095205/cg14011<br>486/cg18634211/cg2<br>7391649                                          | 0.23520769  | 0.310829081 | 0.419153482 | 0.183945792  | 5.18E-05   | 0.000285827 |
| TSS200 | LIPH         | 3  | 185270558                                                                  | cg23620049                                                                                   | 0.449205525 | 0.33774755  | 0.259690332 | -0.189515193 | 1.60E-10   | 5.42E-09    |
| TSS200 | LOC100128288 | 17 | 8263941                                                                    | cg23574443                                                                                   | 0.85852091  | 0.743088261 | 0.631132682 | -0.227388228 | 3.54E-07   | 3.35E-06    |
| TSS200 | LOC100130933 | 17 | 73642628/7364250<br>3/73642547/736426 5<br>07/73642486                     | cg13420383/cg14691<br>671/cg15335334/cg2<br>3702727/cg24869815                               | 0.405777271 | 0.313562163 | 0.251435492 | -0.154341779 | 9.37E-12   | 7.90E-10    |
| TSS200 | LOC100131726 | 8  | 124215033/124215<br>152/124215129                                          | cg00831735/cg00944<br>227/cg08256536                                                         | 0.546131143 | 0.439160239 | 0.394253152 | -0.151877992 | 8.58E-11   | 3.50E-09    |
| TSS200 | LOC100132111 | 1  | 151810904/151810<br>893/151810899/151 4<br>810887                          | cg04296699/cg05021<br>743/cg10781408/cg1<br>5015892                                          | 0.176477322 | 0.284262843 | 0.40436531  | 0.227887988  | 1.47E-09   | 3.05E-08    |
| TSS200 | LOC100133545 | 11 | 2011341/2011312/2<br>011282/2011216/20 6<br>11346/2011238                  | cg04859117/cg07397<br>493/cg08273750/cg0<br>9248429/cg18716210<br>/cg27196158                | 0.537713545 | 0.451979667 | 0.386905146 | -0.150808399 | 1.20E-10   | 4.39E-09    |
| TSS200 | LOC100133991 | 17 | 43339512/4333949<br>7/43339515/433393<br>58/43325167/43339<br>476          | cg01627847/cg03048<br>083/cg08124910/cg0<br>8247376/cg10842515<br>/cg17222164                | 0.089378461 | 0.190352702 | 0.29351037  | 0.204131909  | 0.00015904 | 0.00079014  |
| TSS200 | LOC100188949 | 13 | 30948114/3094810<br>3/30948122                                             | cg06524165/cg08859<br>309/cg12286415                                                         | 0.51701402  | 0.62381902  | 0.709096855 | 0.192082835  | 3.55E-11   | 1.89E-09    |
| TSS200 | LOC100190940 | 12 | 130526916/130527<br>038/130526930/130 5<br>527046/130527030                | cg04745161/cg13576<br>883/cg13822303/cg1<br>5584445/cg24642065                               | 0.332160548 | 0.403325354 | 0.52784197  | 0.195681421  | 4.72E-07   | 4.31E-06    |
| TSS200 | LOC100192379 | 4  | 122685570/122685<br>651/122685675/122 4<br>685641                          | cg10620484/cg13640<br>145/cg16790291/cg1<br>8149485                                          | 0.451123006 | 0.526547567 | 0.640531033 | 0.189408027  | 7.76E-07   | 6.75E-06    |
| TSS200 | LOC100286948 | 5  | 156351055/156351<br>090/156351010                                          | cg05482306/cg07755<br>752/cg12932211                                                         | 0.71944209  | 0.623704798 | 0.533731644 | -0.185710446 | 7.28E-08   | 8.35E-07    |
| TSS200 | LOC100302652 | 2  | 54087200/5408717<br>3/54087178/540872<br>09/54087189/54087<br>343/54087184 | cg00701946/cg05414<br>908/cg08611810/cg1<br>2451530/cg13356253<br>/cg19664945/cg1987<br>8627 | 0.572473798 | 0.691265792 | 0.817638091 | 0.245164293  | 9.62E-14   | 6.22E-11    |



|        |           |    |                                                             |   |                                                                |             |             |             |              |           |             |
|--------|-----------|----|-------------------------------------------------------------|---|----------------------------------------------------------------|-------------|-------------|-------------|--------------|-----------|-------------|
| TSS200 | LOC134466 | 5  | 150326174/150326<br>312/150326193/150 5<br>326213/150326190 |   | cg05016408/cg07499<br>553/cg19585597/cg2<br>6212163/cg27079680 | 0.464399059 | 0.548733801 | 0.625114989 | 0.16071593   | 5.18E-09  | 8.76E-08    |
| TSS200 | LOC145837 | 15 | 69854024                                                    | 1 | cg02711212                                                     | 0.5383661   | 0.43331305  | 0.355184927 | -0.183181173 | 3.93E-11  | 2.01E-09    |
| TSS200 | LOC148145 | 19 | 29455913/2945587<br>3                                       | 2 | cg09364980/cg10578<br>996                                      | 0.5570755   | 0.424992344 | 0.3306826   | -0.2263929   | 1.74E-10  | 5.70E-09    |
| TSS200 | LOC148824 | 1  | 247694271/247694<br>275                                     | 2 | cg12754571/cg12758<br>973                                      | 0.671489918 | 0.750275328 | 0.837403355 | 0.165913437  | 4.80E-09  | 8.27E-08    |
| TSS200 | LOC151174 | 2  | 239140340/239140<br>318/239140369/239 5<br>140485/239140473 |   | cg04166618/cg06732<br>439/cg12608247/cg2<br>4079051/cg24534135 | 0.386820893 | 0.431539149 | 0.574672066 | 0.187851173  | 5.56E-08  | 6.59E-07    |
| TSS200 | LOC157627 | 8  | 9760957/9760869/9<br>760880/9760855/97 5<br>60877           |   | cg00571033/cg10866<br>298/cg12877251/cg1<br>6424920/cg21535000 | 0.277610124 | 0.377193257 | 0.554742041 | 0.277131917  | 8.71E-08  | 9.74E-07    |
| TSS200 | LOC158381 | 9  | 35406590                                                    | 1 | cg27416261                                                     | 0.535522295 | 0.6236495   | 0.706005795 | 0.1704835    | 3.14E-09  | 5.78E-08    |
| TSS200 | LOC169834 | 9  | 115774505                                                   | 1 | cg08476595                                                     | 0.41280071  | 0.487354261 | 0.577460477 | 0.164659767  | 0.0005009 | 0.002215003 |
| TSS200 | LOC200726 | 2  | 207506975/207506<br>991/207507001/207 4<br>507096           |   | cg08057136/cg12110<br>911/cg17165841/cg2<br>1541833            | 0.328318215 | 0.440644479 | 0.59412389  | 0.265805675  | 1.67E-09  | 3.39E-08    |
| TSS200 | LOC283392 | 12 | 72667386/7266732<br>6/72667398                              | 3 | cg00580978/cg09972<br>192/cg13099890                           | 0.354012765 | 0.410007472 | 0.539793214 | 0.185780449  | 5.71E-07  | 5.13E-06    |
| TSS200 | LOC283731 | 15 | 74421635/7442173<br>9                                       | 2 | cg04920649/cg07216<br>112                                      | 0.260177435 | 0.329811139 | 0.443036491 | 0.182859056  | 5.85E-05  | 0.000318986 |
| TSS200 | LOC284441 | 19 | 20368371                                                    | 1 | cg22155405                                                     | 0.608043385 | 0.476266761 | 0.347606018 | -0.260437367 | 4.59E-12  | 5.20E-10    |
| TSS200 | LOC284688 | 1  | 170253405                                                   | 1 | cg25100722                                                     | 0.757265525 | 0.583277372 | 0.524935673 | -0.232329852 | 1.65E-07  | 1.70E-06    |
| TSS200 | LOC285501 | 4  | 178649743/178649<br>783                                     | 2 | cg05769106/cg09364<br>582                                      | 0.735367258 | 0.591805431 | 0.451730898 | -0.28363636  | 4.75E-12  | 5.24E-10    |
| TSS200 | LOC285627 | 5  | 158893318/158893<br>353/158893397                           | 3 | cg06042124/cg18015<br>622/cg18079534                           | 0.860837883 | 0.783446644 | 0.65057715  | -0.210260733 | 4.87E-09  | 8.35E-08    |
| TSS200 | LOC285629 | 5  | 160365753                                                   | 1 | cg04390328                                                     | 0.544169265 | 0.390341617 | 0.310438068 | -0.233731197 | 1.29E-10  | 4.60E-09    |
| TSS200 | LOC285780 | 6  | 6623143/6623243                                             | 2 | cg06961205/cg23123<br>545                                      | 0.58611883  | 0.453344733 | 0.342556241 | -0.243562589 | 1.46E-12  | 2.62E-10    |
| TSS200 | LOC285796 | 6  | 163745629                                                   | 1 | cg24288715                                                     | 0.51485234  | 0.431478417 | 0.3509485   | -0.16390384  | 1.05E-09  | 2.33E-08    |
| TSS200 | LOC285954 | 7  | 41733356/4173344<br>8                                       | 2 | cg00285343/cg07650<br>391                                      | 0.53933112  | 0.422982725 | 0.332149609 | -0.207181511 | 1.70E-09  | 3.44E-08    |
| TSS200 | LOC340357 | 8  | 12669060/1266897<br>3                                       | 2 | cg02249228/cg06066<br>180                                      | 0.608897505 | 0.536558667 | 0.423890941 | -0.185006564 | 5.12E-05  | 0.000282914 |
| TSS200 | LOC392196 | 8  | 11986876/1198693<br>3/11986864/119868 4<br>13               |   | cg13475862/cg15581<br>360/cg21157301/cg2<br>6167010            | 0.814727778 | 0.71277585  | 0.64816752  | -0.166560257 | 1.77E-09  | 3.55E-08    |

|        |           |    |                                                           |   |                                                                               |             |             |             |              |          |             |
|--------|-----------|----|-----------------------------------------------------------|---|-------------------------------------------------------------------------------|-------------|-------------|-------------|--------------|----------|-------------|
| TSS200 | LOC400940 | 2  | 6122107/6121915/6<br>121939/6121909                       | 4 | cg13217590/cg14686<br>555/cg22202692/cg2<br>2314787                           | 0.235264575 | 0.294333858 | 0.403572459 | 0.168307884  | 1.76E-07 | 1.79E-06    |
| TSS200 | LOC401463 | 8  | 65489939/6548990<br>6/65489863/654899<br>37/65489881      | 5 | cg00023185/cg12874<br>181/cg14588078/cg2<br>0702056/cg22585595                | 0.183547905 | 0.262283186 | 0.383378378 | 0.199830473  | 2.30E-05 | 0.000138384 |
| TSS200 | LOC440335 | 16 | 4845285/4845348                                           | 2 | cg07773582/cg08271<br>443                                                     | 0.519411825 | 0.403470475 | 0.317811925 | -0.2015999   | 1.03E-10 | 3.98E-09    |
| TSS200 | LOC440461 | 17 | 66194621/6619470<br>6/66194695/661947<br>21/66194797      | 5 | cg01797488/cg05247<br>809/cg20689647/cg2<br>2083325/cg24011405                | 0.305786418 | 0.375654606 | 0.463101671 | 0.157315253  | 3.15E-06 | 2.36E-05    |
| TSS200 | LOC441666 | 10 | 42863594/4286350<br>8/42863539/428635<br>50               | 4 | cg01485177/cg24527<br>560/cg24598948/cg2<br>4714864                           | 0.314473069 | 0.432830554 | 0.551810431 | 0.237337362  | 5.11E-08 | 6.10E-07    |
| TSS200 | LOC441897 | 1  | 111932556                                                 | 1 | cg24550933                                                                    | 0.658127425 | 0.608548    | 0.503346895 | -0.15478053  | 3.55E-05 | 0.000203487 |
| TSS200 | LOC643387 | 2  | 239140318/239140<br>169/239140190/239<br>140296/239140182 | 5 | cg06732439/cg07323<br>141/cg13530938/cg2<br>1272465/cg23497383                | 0.443331268 | 0.496596531 | 0.651977202 | 0.208645934  | 8.95E-08 | 9.98E-07    |
| TSS200 | LOC643719 | 19 | 35068788/3506871<br>0/35068628                            | 3 | cg02921624/cg04714<br>041/cg07599133                                          | 0.294482413 | 0.365617248 | 0.507746775 | 0.213264363  | 4.51E-08 | 5.51E-07    |
| TSS200 | LOC643923 | 11 | 107462437/107462<br>445/107462430                         | 3 | cg02989521/cg19266<br>910/cg21068911                                          | 0.056736119 | 0.134151078 | 0.290224436 | 0.233488316  | 6.47E-05 | 0.000348079 |
| TSS200 | LOC644649 | 16 | 59789219                                                  | 1 | cg13027458                                                                    | 0.406717145 | 0.300971356 | 0.238677409 | -0.168039736 | 7.52E-14 | 5.65E-11    |
| TSS200 | LOC644936 | 5  | 79596319                                                  | 1 | cg09387179                                                                    | 0.761945425 | 0.676012    | 0.603630391 | -0.158315034 | 1.70E-07 | 1.74E-06    |
| TSS200 | LOC646214 | 15 | 21940895                                                  | 1 | cg20344956                                                                    | 0.553579835 | 0.482734394 | 0.369699491 | -0.183880344 | 3.62E-08 | 4.57E-07    |
| TSS200 | LOC653486 | 11 | 193044/193021/192<br>996/192897/193062<br>/193016         | 6 | cg02378673/cg03960<br>562/cg17345964/cg1<br>8793661/cg20297976<br>/cg22280333 | 0.602697462 | 0.490036682 | 0.398992062 | -0.2037054   | 1.21E-12 | 2.38E-10    |
| TSS200 | LOC653566 | 1  | 28423139                                                  | 1 | cg07844563                                                                    | 0.80585265  | 0.711424778 | 0.584357341 | -0.221495309 | 5.73E-09 | 9.52E-08    |
| TSS200 | LOC653786 | 16 | 22556947                                                  | 1 | cg15592863                                                                    | 0.74911871  | 0.659778694 | 0.580490086 | -0.168628624 | 6.04E-05 | 0.000327854 |
| TSS200 | LOC728606 | 18 | 24283669/2428368<br>4/24283696                            | 3 | cg07108927/cg13758<br>913/cg24667758                                          | 0.539963518 | 0.440310294 | 0.385225429 | -0.15473809  | 2.17E-08 | 2.94E-07    |
| TSS200 | LOC729668 | 10 | 30663455/3066342<br>6/30663547                            | 3 | cg12819931/cg16018<br>729/cg23746239                                          | 0.77425692  | 0.710564272 | 0.577785636 | -0.196471284 | 1.04E-08 | 1.57E-07    |
| TSS200 | LOC84931  | 2  | 121223947/121224<br>009/121223964                         | 3 | cg11455444/cg18434<br>354/cg23689428                                          | 0.484106305 | 0.347058294 | 0.271185868 | -0.212920437 | 4.26E-12 | 5.02E-10    |

|        |          |    |                                                       |   |                                                                   |             |             |             |              |             |             |
|--------|----------|----|-------------------------------------------------------|---|-------------------------------------------------------------------|-------------|-------------|-------------|--------------|-------------|-------------|
| TSS200 | LOC90246 | 3  | 128226649/128226499/128226565                         | 3 | cg05272921/cg06620972/cg18453551                                  | 0.55796157  | 0.458854219 | 0.364326683 | -0.193634887 | 2.49E-12    | 3.89E-10    |
| TSS200 | LOC92973 | 9  | 35860158                                              | 1 | cg22924796                                                        | 0.658685235 | 0.606817306 | 0.508653782 | -0.150031453 | 0.000166485 | 0.000822737 |
| TSS200 | LONRF2   | 2  | 100939284                                             | 1 | cg08017756                                                        | 0.25777184  | 0.416011089 | 0.529280941 | 0.271509101  | 9.26E-07    | 7.94E-06    |
| TSS200 | LPA      | 6  | 161087439/161087573/161087506                         | 3 | cg11975608/cg16960593/cg17189167                                  | 0.510142453 | 0.413812769 | 0.359483107 | -0.150659346 | 4.65E-09    | 8.07E-08    |
| TSS200 | LPIN2    | 18 | 3012017/3011980/3011965                               | 3 | cg10904070/cg12052497/cg16857548                                  | 0.653245712 | 0.5580302   | 0.486006368 | -0.167239343 | 6.45E-07    | 5.72E-06    |
| TSS200 | LPPR4    | 1  | 99729804/99729807/99729757/99729790/99729769/99729780 | 6 | cg03580297/cg03646889/cg05596294/cg06060191/cg18947801/cg26164310 | 0.251086583 | 0.325342127 | 0.476043734 | 0.224957151  | 1.20E-06    | 1.01E-05    |
| TSS200 | LPPR5    | 1  | 99470550/99470560/99470618                            | 3 | cg03120289/cg10159215/cg19365673                                  | 0.311524188 | 0.365179886 | 0.470671907 | 0.159147719  | 9.12E-08    | 1.01E-06    |
| TSS200 | LRFN5    | 14 | 42076759/42076710/42076757                            | 3 | cg03566719/cg13526007/cg14021345                                  | 0.34677136  | 0.464009417 | 0.635554882 | 0.288783522  | 1.32E-09    | 2.79E-08    |
| TSS200 | LRRC3B   | 3  | 26664181/26664115/26664285                            | 3 | cg05583398/cg13787438/cg24216220                                  | 0.259333422 | 0.366976277 | 0.51808965  | 0.258756228  | 6.93E-10    | 1.68E-08    |
| TSS200 | LRRC4B   | 19 | 51071307/51071328/51071316/51071309                   | 4 | cg07522981/cg14110073/cg14684296/cg22231329                       | 0.235906646 | 0.283215518 | 0.412806969 | 0.176900323  | 0.002095886 | 0.008106458 |
| TSS200 | LRRC67   | 8  | 67940929/67940913/67940823/67940950                   | 4 | cg03024587/cg03780545/cg15744359/cg21189727                       | 0.108376956 | 0.129075504 | 0.283722116 | 0.17534516   | 0.000944857 | 0.003932291 |
| TSS200 | LRRN4    | 20 | 6034694/6034888                                       | 2 | cg20918682/cg26175343                                             | 0.464005903 | 0.399916233 | 0.29600672  | -0.167999182 | 2.50E-11    | 1.54E-09    |
| TSS200 | LST1     | 6  | 31554848/31554946/31554829                            | 3 | cg14324675/cg19271190/cg27616007                                  | 0.535650105 | 0.473558652 | 0.384672186 | -0.150977919 | 1.04E-07    | 1.14E-06    |
| TSS200 | LTBP1    | 2  | 33359529/33359550                                     | 2 | cg03906115/cg08357990                                             | 0.345918218 | 0.230651672 | 0.17554961  | -0.170368608 | 1.01E-10    | 3.93E-09    |
| TSS200 | LTF      | 3  | 46506554/46506483/46506481/46506404/46506552/46506519 | 6 | cg00716083/cg03933131/cg12295918/cg17527798/cg26307117/cg27314002 | 0.433721122 | 0.504568967 | 0.600405533 | 0.166684412  | 2.41E-09    | 4.60E-08    |
| TSS200 | LUZP2    | 11 | 24518448/24518367/24518414/24518374/24518381/24518379 | 6 | cg01557027/cg08068240/cg13083436/cg13922669/cg25469414/cg26242583 | 0.263513052 | 0.291130256 | 0.434018725 | 0.170505673  | 0.00029372  | 0.001368128 |
| TSS200 | LVRN     | 5  | 115297989/115298079                                   | 2 | cg03890037/cg16620526                                             | 0.4494843   | 0.504920733 | 0.654695045 | 0.205210745  | 7.87E-12    | 7.10E-10    |

|        |         |    |                                                                                                                                                                                               |    |                                                                                                                                                                                                                  |             |             |             |              |             |             |
|--------|---------|----|-----------------------------------------------------------------------------------------------------------------------------------------------------------------------------------------------|----|------------------------------------------------------------------------------------------------------------------------------------------------------------------------------------------------------------------|-------------|-------------|-------------|--------------|-------------|-------------|
| TSS200 | LY6D    | 8  | 143868062/143868013/143868023/143868049/143868136/143868110/143868158                                                                                                                         | 7  | cg04811942/cg07572435/cg08137669/cg08209691/cg09964873/cg10140583/cg14585892                                                                                                                                     | 0.581887103 | 0.505047627 | 0.431736409 | -0.150150694 | 4.20E-11    | 2.13E-09    |
| TSS200 | LY6H    | 8  | 144242106/144241809                                                                                                                                                                           | 2  | cg24971209/cg26663686                                                                                                                                                                                            | 0.172028078 | 0.212918355 | 0.34102369  | 0.168995612  | 0.000562317 | 0.002448818 |
| TSS200 | MADCAM1 | 19 | 496425/496419/496428/496296                                                                                                                                                                   | 4  | cg08403345/cg13777292/cg14985989/cg26522278                                                                                                                                                                      | 0.319433613 | 0.403379662 | 0.535114655 | 0.215681042  | 3.57E-08    | 4.51E-07    |
| TSS200 | MAP3K13 | 3  | 185080905/185080816/185080951                                                                                                                                                                 | 3  | cg11743827/cg19418951/cg21574349                                                                                                                                                                                 | 0.369315628 | 0.489911959 | 0.65445397  | 0.285138341  | 2.43E-11    | 1.51E-09    |
| TSS200 | MAP4K1  | 19 | 39108723/39108672                                                                                                                                                                             | 2  | cg04292549/cg24337786                                                                                                                                                                                            | 0.46620693  | 0.594419856 | 0.66790725  | 0.20170032   | 1.88E-07    | 1.90E-06    |
| TSS200 | MBOAT4  | 8  | 30002223                                                                                                                                                                                      | 1  | cg21058822                                                                                                                                                                                                       | 0.39984712  | 0.298299461 | 0.223907241 | -0.175939879 | 1.28E-10    | 4.60E-09    |
| TSS200 | MCHR2   | 6  | 100442105/100442118/100442151/100442120                                                                                                                                                       | 4  | cg06610484/cg09393254/cg22473637/cg26466587                                                                                                                                                                      | 0.492219206 | 0.588150617 | 0.743534964 | 0.251315757  | 2.16E-11    | 1.40E-09    |
| TSS200 | MDFI    | 6  | 41605994                                                                                                                                                                                      | 1  | cg08625380                                                                                                                                                                                                       | 0.113236383 | 0.194036997 | 0.356328224 | 0.243091842  | 4.39E-05    | 0.000246463 |
| TSS200 | MDS2    | 1  | 23953778                                                                                                                                                                                      | 1  | cg18418928                                                                                                                                                                                                       | 0.43154022  | 0.324073006 | 0.259054545 | -0.172485675 | 5.65E-10    | 1.44E-08    |
| TSS200 | MEI1    | 22 | 42095368/42095430/42095347/42095441/42095443                                                                                                                                                  | 5  | cg10296410/cg10384919/cg20522370/cg22476848/cg22804236                                                                                                                                                           | 0.362991954 | 0.454106674 | 0.551851857 | 0.188859903  | 2.83E-06    | 2.15E-05    |
| TSS200 | MEP1A   | 6  | 46761071/46761090/46761035                                                                                                                                                                    | 3  | cg02449202/cg16019620/cg20980592                                                                                                                                                                                 | 0.554129822 | 0.444787735 | 0.35605627  | -0.198073552 | 4.86E-11    | 2.35E-09    |
| TSS200 | MEP1B   | 18 | 29769853                                                                                                                                                                                      | 1  | cg12602653                                                                                                                                                                                                       | 0.64568932  | 0.529973822 | 0.415921186 | -0.229768134 | 1.01E-10    | 3.94E-09    |
| TSS200 | MEST    | 7  | 130126024/130131146/130131136/130131826/130131916/130131931/130130995/130126018/130131887/130131829/130125932/130131905/130131085/130131869/130131923/130131138/130131921/130131797/130131885 | 19 | cg01793704/cg05369791/cg06100421/cg06212135/cg07315018/cg07870293/cg09003373/cg09059945/cg09080913/cg10249538/cg11865119/cg13104298/cg14088957/cg16823958/cg20050761/cg20297423/cg21629528/cg22705386/cg27338480 | 0.526886242 | 0.592524174 | 0.678105422 | 0.15121918   | 6.95E-13    | 1.88E-10    |

|        |           |    |                                                                   |                                                                               |             |             |             |              |          |          |
|--------|-----------|----|-------------------------------------------------------------------|-------------------------------------------------------------------------------|-------------|-------------|-------------|--------------|----------|----------|
| TSS200 | MESTIT1   | 7  | 130131146/130131<br>136/130131189/130 5<br>131085/130131138       | cg05369791/cg06100<br>421/cg08734637/cg1<br>4088957/cg20297423                | 0.562154725 | 0.650380607 | 0.767327435 | 0.20517271   | 4.31E-13 | 1.62E-10 |
| TSS200 | MGAM      | 7  | 141695533/141695<br>623                                           | cg10681483/cg26125<br>550                                                     | 0.521825835 | 0.446723831 | 0.364010068 | -0.157815767 | 4.20E-07 | 3.88E-06 |
| TSS200 | MGAT3     | 22 | 39883192/3988319<br>0                                             | cg00101350/cg00550<br>928                                                     | 0.790418525 | 0.660400725 | 0.610290702 | -0.180127823 | 1.99E-08 | 2.71E-07 |
| TSS200 | MGAT5B    | 17 | 74868670/7486856<br>1/74868604/748687<br>25                       | cg05514299/cg16671<br>079/cg23838005/cg2<br>7149973                           | 0.398209123 | 0.304454233 | 0.208404534 | -0.189804589 | 1.27E-12 | 2.41E-10 |
| TSS200 | MGC23270  | 14 | 105287408/105287<br>427                                           | cg08111922/cg14152<br>268                                                     | 0.517514685 | 0.442565211 | 0.345114364 | -0.172400321 | 3.49E-09 | 6.36E-08 |
| TSS200 | MGC26647  | 7  | 88425077/8842508<br>5/88425139/884251<br>22/88425148              | cg00729133/cg05079<br>191/cg13354414/cg1<br>5325154/cg22946147                | 0.80310907  | 0.694699378 | 0.599071029 | -0.204038041 | 2.64E-07 | 2.58E-06 |
| TSS200 | MGC2889   | 3  | 192959372                                                         | cg13810562                                                                    | 0.25417425  | 0.296998489 | 0.503987091 | 0.249812841  | 1.01E-05 | 6.64E-05 |
| TSS200 | MIA2      | 14 | 39702965                                                          | cg23292259                                                                    | 0.656321615 | 0.552622678 | 0.491461964 | -0.164859651 | 1.60E-08 | 2.23E-07 |
| TSS200 | MIR10A    | 17 | 46657504/4665734<br>6                                             | cg15649236/cg26916<br>621                                                     | 0.493043483 | 0.389800267 | 0.310432995 | -0.182610487 | 6.89E-11 | 3.01E-09 |
| TSS200 | MIR1204   | 8  | 128808063/128808<br>017                                           | cg11201447/cg25247<br>520                                                     | 0.436898588 | 0.262711901 | 0.179305958 | -0.257592629 | 1.07E-10 | 4.10E-09 |
| TSS200 | MIR124-1  | 8  | 9761141/9761171                                                   | cg14278808/cg15248<br>835                                                     | 0.17467567  | 0.290067164 | 0.54393962  | 0.36926395   | 2.38E-07 | 2.35E-06 |
| TSS200 | MIR124-2  | 8  | 65291703/6529152<br>3/65291562/652916<br>82/65291513/65291<br>542 | cg05455720/cg05474<br>726/cg16189671/cg2<br>0653075/cg25900085<br>/cg27313642 | 0.345955406 | 0.466054145 | 0.593240028 | 0.247284622  | 1.11E-09 | 2.42E-08 |
| TSS200 | MIR124-3  | 20 | 61809830/6180982<br>7/61809841/618098<br>34/61809724/61809<br>716 | cg01052879/cg03387<br>135/cg15028514/cg1<br>8627360/cg19267861<br>/cg20277905 | 0.280579503 | 0.414029426 | 0.563995831 | 0.283416329  | 1.45E-07 | 1.52E-06 |
| TSS200 | MIR1260   | 14 | 77732494/7773246<br>8                                             | cg10134156/cg25952<br>096                                                     | 0.792346298 | 0.717037181 | 0.613726984 | -0.178619313 | 1.04E-07 | 1.13E-06 |
| TSS200 | MIR1272   | 15 | 65054892/6505482<br>7                                             | cg10537328/cg12002<br>820                                                     | 0.682885625 | 0.609756883 | 0.498837091 | -0.184048534 | 6.86E-07 | 6.05E-06 |
| TSS200 | MIR1283-1 | 19 | 54191610/5419170<br>6                                             | cg09318158/cg26377<br>653                                                     | 0.682152285 | 0.5586917   | 0.470267086 | -0.211885199 | 2.76E-10 | 8.14E-09 |
| TSS200 | MIR129-1  | 7  | 127847835                                                         | cg04524088                                                                    | 0.4984081   | 0.400670611 | 0.307622123 | -0.190785977 | 2.01E-07 | 2.01E-06 |
| TSS200 | MIR129-2  | 11 | 43602879/4360292<br>0/43602847/436028<br>57/43602845/43602<br>914 | cg01939477/cg05376<br>374/cg14416371/cg1<br>4944647/cg15556502<br>/cg16407471 | 0.279857002 | 0.39352092  | 0.603149488 | 0.323292486  | 8.90E-09 | 1.38E-07 |
| TSS200 | MIR134    | 14 | 101520989                                                         | cg13753460                                                                    | 0.55769707  | 0.460452167 | 0.394394582 | -0.163302488 | 9.93E-11 | 3.89E-09 |

|        |          |    |                                                                   |   |                                                                               |             |             |             |              |          |          |
|--------|----------|----|-------------------------------------------------------------------|---|-------------------------------------------------------------------------------|-------------|-------------|-------------|--------------|----------|----------|
| TSS200 | MIR137   | 1  | 98511908/9851179<br>2/98511789                                    | 3 | cg05423529/cg14783<br>814/cg22333214                                          | 0.279652767 | 0.369001891 | 0.565508567 | 0.2858558    | 1.18E-08 | 1.73E-07 |
| TSS200 | MIR138-1 | 3  | 44155650                                                          | 1 | cg03918530                                                                    | 0.635006725 | 0.549483161 | 0.440437595 | -0.19456913  | 2.41E-08 | 3.21E-07 |
| TSS200 | MIR141   | 12 | 7073247/7073242/7<br>073240/7073179                               | 4 | cg12161331/cg18185<br>189/cg19794481/cg2<br>3067082                           | 0.569519493 | 0.46804974  | 0.389014711 | -0.180504781 | 5.35E-11 | 2.53E-09 |
| TSS200 | MIR1910  | 16 | 85775359                                                          | 1 | cg25575961                                                                    | 0.659314945 | 0.503709539 | 0.3686335   | -0.290681445 | 1.83E-11 | 1.24E-09 |
| TSS200 | MIR192   | 11 | 64658765/6465881<br>9/64658903/646587<br>26                       | 4 | cg09349409/cg18262<br>830/cg24803202/cg2<br>7083891                           | 0.569253283 | 0.46756105  | 0.384682885 | -0.184570398 | 1.64E-11 | 1.17E-09 |
| TSS200 | MIR194-2 | 11 | 64659065/6465906<br>0/64658940/646589<br>36/64658946/64659<br>044 | 6 | cg00376448/cg00400<br>165/cg00589493/cg0<br>8432452/cg13092487<br>/cg24154336 | 0.575365246 | 0.480658808 | 0.403189081 | -0.172176165 | 2.83E-11 | 1.63E-09 |
| TSS200 | MIR196A1 | 17 | 46710001                                                          | 1 | cg02329038                                                                    | 0.428088995 | 0.301733672 | 0.236522977 | -0.191566018 | 4.08E-09 | 7.22E-08 |
| TSS200 | MIR1974  | 5  | 93905358/9390542<br>7/93905343/939052<br>57/93905270              | 5 | cg00964137/cg03964<br>851/cg16695999/cg2<br>5368943/cg26338386                | 0.72605759  | 0.637869939 | 0.550460209 | -0.175597381 | 6.37E-10 | 1.57E-08 |
| TSS200 | MIR200C  | 12 | 7072696/7072765/7<br>072727                                       | 3 | cg00366413/cg22413<br>603/cg27534624                                          | 0.505175742 | 0.396195065 | 0.309023638 | -0.196152104 | 2.54E-11 | 1.54E-09 |
| TSS200 | MIR205   | 1  | 209605401/209605<br>304                                           | 2 | cg03794445/cg17848<br>546                                                     | 0.68037358  | 0.599237278 | 0.511087373 | -0.169286207 | 5.64E-11 | 2.62E-09 |
| TSS200 | MIR216A  | 2  | 56216320/5621623<br>4/56216195                                    | 3 | cg16403360/cg24343<br>835/cg25249448                                          | 0.629184945 | 0.557722164 | 0.46861227  | -0.160572675 | 8.04E-07 | 6.98E-06 |
| TSS200 | MIR2276  | 13 | 24736455/2473651<br>8                                             | 2 | cg00861695/cg07152<br>812                                                     | 0.63067521  | 0.506310128 | 0.377013732 | -0.253661478 | 9.65E-13 | 2.12E-10 |
| TSS200 | MIR298   | 20 | 57393380                                                          | 1 | cg21983491                                                                    | 0.625575105 | 0.533881883 | 0.398177314 | -0.227397791 | 3.46E-09 | 6.32E-08 |
| TSS200 | MIR300   | 14 | 101507570/101507<br>590                                           | 2 | cg02174748/cg10137<br>253                                                     | 0.582182385 | 0.511466611 | 0.403604759 | -0.178577626 | 3.25E-08 | 4.15E-07 |
| TSS200 | MIR30E   | 1  | 41220011                                                          | 1 | cg14092259                                                                    | 0.834400415 | 0.701360878 | 0.623178191 | -0.211222224 | 9.56E-06 | 6.31E-05 |
| TSS200 | MIR331   | 12 | 95702136/9570207<br>1                                             | 2 | cg09995736/cg11690<br>824                                                     | 0.766605178 | 0.617743514 | 0.552339775 | -0.214265403 | 2.46E-10 | 7.42E-09 |
| TSS200 | MIR338   | 17 | 79099785/7909988<br>2/79099777/790998<br>19/79099942              | 5 | cg06807993/cg06869<br>212/cg18637486/cg2<br>1473782/cg23295826                | 0.772468942 | 0.59259095  | 0.577218555 | -0.195250387 | 9.90E-06 | 6.51E-05 |
| TSS200 | MIR346   | 10 | 88024553/8802455<br>7/88024598/880245<br>72/88024673/88024<br>569 | 6 | cg14368220/cg15282<br>281/cg16570507/cg1<br>6692757/cg23322812<br>/cg25972714 | 0.592430308 | 0.480534302 | 0.384381735 | -0.208048573 | 1.53E-10 | 5.26E-09 |

|        |          |    |                                                   |   |                                                        |             |             |             |              |          |             |
|--------|----------|----|---------------------------------------------------|---|--------------------------------------------------------|-------------|-------------|-------------|--------------|----------|-------------|
| TSS200 | MIR34B   | 11 | 111383603/111383576/111383515/111383624/111383653 | 5 | cg13767940/cg21881253/cg22879515/cg23211240/cg26561785 | 0.161390003 | 0.272821181 | 0.522451961 | 0.361061958  | 1.91E-06 | 1.52E-05    |
| TSS200 | MIR365-1 | 16 | 14403022/14403040/14403004/14403138               | 4 | cg00928596/cg02533339/cg06916001/cg22388260            | 0.499707091 | 0.613790888 | 0.706811303 | 0.207104212  | 5.03E-10 | 1.31E-08    |
| TSS200 | MIR376A2 | 14 | 101506323/101506379/101506246                     | 3 | cg12881150/cg14144314/cg19757573                       | 0.742856413 | 0.636958117 | 0.575756877 | -0.167099536 | 4.72E-10 | 1.25E-08    |
| TSS200 | MIR383   | 8  | 14711027                                          | 1 | cg19004110                                             | 0.615369055 | 0.479261789 | 0.416784764 | -0.198584291 | 3.75E-08 | 4.71E-07    |
| TSS200 | MIR409   | 14 | 101531617/101531510/101531593                     | 3 | cg14285142/cg20547131/cg23270924                       | 0.665522942 | 0.553785044 | 0.48645887  | -0.179064072 | 6.09E-12 | 6.03E-10    |
| TSS200 | MIR455   | 9  | 116971621/116971578                               | 2 | cg14361119/cg18717689                                  | 0.542717455 | 0.416557061 | 0.364778045 | -0.17793941  | 6.95E-08 | 8.05E-07    |
| TSS200 | MIR487A  | 14 | 101518615/101518766                               | 2 | cg00395657/cg23399577                                  | 0.740178605 | 0.662458381 | 0.58874707  | -0.151431535 | 1.11E-09 | 2.42E-08    |
| TSS200 | MIR493   | 14 | 101335381/101335283/101335228/101335386           | 4 | cg04802696/cg11346901/cg12785573/cg16762843            | 0.691728341 | 0.603911956 | 0.524062593 | -0.167665748 | 7.55E-07 | 6.60E-06    |
| TSS200 | MIR520B  | 19 | 54204449/54204403                                 | 2 | cg17857791/cg19606290                                  | 0.685668638 | 0.628304847 | 0.503216936 | -0.182451701 | 5.64E-07 | 5.08E-06    |
| TSS200 | MIR520D  | 19 | 54223189                                          | 1 | cg22457503                                             | 0.61583299  | 0.4944214   | 0.398564273 | -0.217268717 | 6.08E-09 | 9.97E-08    |
| TSS200 | MIR525   | 19 | 54200652                                          | 1 | cg09514545                                             | 0.38079224  | 0.282318928 | 0.229140314 | -0.151651926 | 1.57E-08 | 2.20E-07    |
| TSS200 | MIR526A2 | 19 | 54230170                                          | 1 | cg15937784                                             | 0.494793435 | 0.410986617 | 0.291583436 | -0.203209999 | 5.09E-13 | 1.67E-10    |
| TSS200 | MIR548B  | 6  | 119390418                                         | 1 | cg12396622                                             | 0.879808835 | 0.786142539 | 0.643347727 | -0.236461108 | 9.03E-08 | 1.01E-06    |
| TSS200 | MIR549   | 15 | 81134479/81134497                                 | 2 | cg16530970/cg22929280                                  | 0.75898514  | 0.642816275 | 0.503819807 | -0.255165333 | 1.15E-08 | 1.70E-07    |
| TSS200 | MIR563   | 3  | 15915216                                          | 1 | cg23023604                                             | 0.66340685  | 0.508635728 | 0.382680332 | -0.280726518 | 5.60E-13 | 1.75E-10    |
| TSS200 | MIR628   | 15 | 55665236                                          | 1 | cg09672452                                             | 0.532736895 | 0.465960717 | 0.375190145 | -0.15754675  | 2.64E-05 | 0.000156657 |
| TSS200 | MIR654   | 14 | 101506532/101506379                               | 2 | cg04585937/cg14144314                                  | 0.692308923 | 0.597723656 | 0.506532516 | -0.185776407 | 1.38E-08 | 2.00E-07    |
| TSS200 | MIR662   | 16 | 820050/820122/820155                              | 3 | cg06502071/cg16108835/cg26945867                       | 0.692884463 | 0.61703585  | 0.526998143 | -0.165886319 | 3.92E-09 | 6.97E-08    |
| TSS200 | MIR670   | 11 | 43581175/43581118/43581108                        | 3 | cg07616094/cg14294096/cg26024682                       | 0.571509677 | 0.480157613 | 0.371256305 | -0.200253372 | 5.57E-10 | 1.42E-08    |
| TSS200 | MIR708   | 11 | 79113178                                          | 1 | cg05473648                                             | 0.75209949  | 0.680079061 | 0.566415323 | -0.185684167 | 4.50E-06 | 3.23E-05    |
| TSS200 | MIR885   | 3  | 10436406/10436304/10436249/10436325/10436278      | 5 | cg05365685/cg05571558/cg20745248/cg23230910/cg24605341 | 0.74391386  | 0.672547542 | 0.566578798 | -0.177335062 | 3.23E-10 | 9.22E-09    |
| TSS200 | MIR889   | 14 | 101514051                                         | 1 | cg03290602                                             | 0.77199904  | 0.711557767 | 0.545312605 | -0.226686435 | 1.35E-06 | 1.12E-05    |

|        |         |    |                                                                                                                                   |    |                                                                                                                                                |             |             |             |              |             |             |
|--------|---------|----|-----------------------------------------------------------------------------------------------------------------------------------|----|------------------------------------------------------------------------------------------------------------------------------------------------|-------------|-------------|-------------|--------------|-------------|-------------|
| TSS200 | MIR9-3  | 15 | 89911148                                                                                                                          | 1  | cg12530503                                                                                                                                     | 0.54023667  | 0.58918945  | 0.704973841 | 0.164737171  | 3.19E-07    | 3.05E-06    |
| TSS200 | MME     | 3  | 154797349/154797867/154797508/154797399/154797592/154797589/154797563/154797958/154797677/154797779/154797947/154797917/154797892 | 13 | cg00992239/cg02108850/cg03648334/cg08085954/cg14750844/cg16580737/cg17344755/cg20216802/cg21496658/cg22471230/cg22955973/cg23209255/cg26872138 | 0.11955087  | 0.164302741 | 0.288402509 | 0.168851638  | 0.002667606 | 0.010056294 |
| TSS200 | MMP1    | 11 | 102669090                                                                                                                         | 1  | cg14543953                                                                                                                                     | 0.720343735 | 0.589016539 | 0.404577436 | -0.315766299 | 1.27E-08    | 1.85E-07    |
| TSS200 | MMP12   | 11 | 102745934/102745854                                                                                                               | 2  | cg09002726/cg23979520                                                                                                                          | 0.651482835 | 0.527188967 | 0.453365866 | -0.198116969 | 2.09E-11    | 1.37E-09    |
| TSS200 | MMP13   | 11 | 102826570/102826565/102826469                                                                                                     | 3  | cg14995062/cg19620758/cg22658979                                                                                                               | 0.752634965 | 0.557625358 | 0.396195655 | -0.35643931  | 3.31E-13    | 1.34E-10    |
| TSS200 | MMP16   | 8  | 89339819                                                                                                                          | 1  | cg04684553                                                                                                                                     | 0.136884403 | 0.189701904 | 0.422589257 | 0.285704854  | 7.63E-05    | 0.000404791 |
| TSS200 | MMP20   | 11 | 102496104/102496115/102496159                                                                                                     | 3  | cg12020179/cg22322158/cg26757793                                                                                                               | 0.568922442 | 0.48167883  | 0.379348689 | -0.189573752 | 1.61E-11    | 1.17E-09    |
| TSS200 | MMP26   | 11 | 5009311                                                                                                                           | 1  | cg12493906                                                                                                                                     | 0.7180576   | 0.542074328 | 0.422492664 | -0.295564936 | 3.59E-13    | 1.38E-10    |
| TSS200 | MOXD1   | 6  | 132722810/132722664/132722778/132722770/132722822                                                                                 | 5  | cg01019028/cg08661899/cg13640626/cg21294812/cg26178272                                                                                         | 0.127174648 | 0.13160774  | 0.286870367 | 0.159695718  | 0.001967537 | 0.007651318 |
| TSS200 | MOXD2   | 7  | 141946928                                                                                                                         | 1  | cg16697850                                                                                                                                     | 0.40665397  | 0.291804311 | 0.226183195 | -0.180470775 | 1.37E-11    | 1.06E-09    |
| TSS200 | MPP7    | 10 | 28571186                                                                                                                          | 1  | cg17749384                                                                                                                                     | 0.65685662  | 0.5836249   | 0.498176509 | -0.158680111 | 9.49E-07    | 8.13E-06    |
| TSS200 | MPPED1  | 22 | 43807949/43807980                                                                                                                 | 2  | cg01148441/cg22347322                                                                                                                          | 0.247144288 | 0.289267228 | 0.42319412  | 0.176049833  | 1.54E-05    | 9.71E-05    |
| TSS200 | MPZ     | 1  | 161279762                                                                                                                         | 1  | cg00259886                                                                                                                                     | 0.48032496  | 0.387680144 | 0.274989318 | -0.205335642 | 7.84E-12    | 7.10E-10    |
| TSS200 | MRGPRD  | 11 | 68748461/68748528/68748506/68748584                                                                                               | 4  | cg02023548/cg10791422/cg16659728/cg18790382                                                                                                    | 0.595963315 | 0.490875254 | 0.394591273 | -0.201372042 | 4.50E-11    | 2.21E-09    |
| TSS200 | MRGPRG  | 11 | 3240201/3240068/3240122                                                                                                           | 3  | cg02681040/cg24702253/cg26462595                                                                                                               | 0.667035373 | 0.580236394 | 0.499476932 | -0.167558441 | 3.48E-10    | 9.86E-09    |
| TSS200 | MRGPRX1 | 11 | 18956637                                                                                                                          | 1  | cg09346831                                                                                                                                     | 0.66649953  | 0.583576022 | 0.4947381   | -0.17176143  | 4.86E-09    | 8.34E-08    |
| TSS200 | MRPS21  | 1  | 150266242/150266158/150266227/150266194                                                                                           | 4  | cg01566242/cg04724277/cg23650482/cg25373063                                                                                                    | 0.130523937 | 0.188370463 | 0.288049793 | 0.157525856  | 6.74E-05    | 0.000361026 |
| TSS200 | MSC     | 8  | 72756882/72756863/72756812/72756901/72756839                                                                                      | 5  | cg03347018/cg14546394/cg20675505/cg24258699/cg25827490                                                                                         | 0.243803204 | 0.377820598 | 0.542911809 | 0.299108604  | 4.29E-08    | 5.27E-07    |



|        |          |    |                                                                   |   |                                                                               |             |             |             |              |             |             |
|--------|----------|----|-------------------------------------------------------------------|---|-------------------------------------------------------------------------------|-------------|-------------|-------------|--------------|-------------|-------------|
| TSS200 | MT4      | 16 | 56598820                                                          | 1 | cg13373996                                                                    | 0.676624915 | 0.616311461 | 0.521333891 | -0.155291024 | 3.42E-07    | 3.24E-06    |
| TSS200 | MTMR7    | 8  | 17271105/1727109<br>3/17271067/172711<br>19                       | 4 | cg04792712/cg08231<br>493/cg12296772/cg1<br>5600488                           | 0.428963725 | 0.454124111 | 0.608298614 | 0.179334889  | 0.004579839 | 0.016283988 |
| TSS200 | MUC13    | 3  | 124653632/124653<br>659/124653718                                 | 3 | cg06196689/cg22907<br>034/cg26225893                                          | 0.487771923 | 0.383388117 | 0.292570168 | -0.195201755 | 2.34E-10    | 7.12E-09    |
| TSS200 | MUC2     | 11 | 1074869/1074682/1<br>074873/1074749/10<br>74715/1074757           | 6 | cg02332740/cg03502<br>236/cg04657268/cg1<br>1024522/cg11247695<br>/cg13911594 | 0.546999983 | 0.434163449 | 0.349758981 | -0.197241002 | 1.76E-11    | 1.21E-09    |
| TSS200 | MUC20    | 3  | 195447691                                                         | 1 | cg05012239                                                                    | 0.48568542  | 0.381295906 | 0.295891841 | -0.189793579 | 2.32E-10    | 7.10E-09    |
| TSS200 | MUC21    | 6  | 30951394/3095137<br>7                                             | 2 | cg07538160/cg15442<br>792                                                     | 0.497656298 | 0.369530936 | 0.280403155 | -0.217253143 | 5.92E-12    | 5.98E-10    |
| TSS200 | MUM1     | 19 | 1356269/1356153/1<br>356150/1356304/13<br>56315/1356278           | 6 | cg02413187/cg04604<br>656/cg08643131/cg1<br>3646005/cg23057220<br>/cg23674169 | 0.485383692 | 0.399680735 | 0.310210267 | -0.175173425 | 8.95E-09    | 1.38E-07    |
| TSS200 | MYF5     | 12 | 81110706                                                          | 1 | cg14067873                                                                    | 0.39254629  | 0.462450628 | 0.580411205 | 0.187864915  | 9.00E-06    | 6.00E-05    |
| TSS200 | MYH4     | 17 | 10372972                                                          | 1 | cg08014964                                                                    | 0.501631285 | 0.437755567 | 0.341907541 | -0.159723744 | 0.000174779 | 0.000860741 |
| TSS200 | MYL5     | 4  | 671550/671543                                                     | 2 | cg09959931/cg21254<br>883                                                     | 0.47465933  | 0.389817233 | 0.302585759 | -0.172073571 | 4.01E-10    | 1.09E-08    |
| TSS200 | MYLK4    | 6  | 2751204                                                           | 1 | cg25513776                                                                    | 0.44642793  | 0.363208144 | 0.279663864 | -0.166764066 | 2.29E-08    | 3.07E-07    |
| TSS200 | MYO15B   | 17 | 73583945/7358410<br>8/73584111/735840<br>68/73584029/73584<br>070 | 6 | cg00204465/cg03744<br>440/cg04738888/cg0<br>6390536/cg12184886<br>/cg22287064 | 0.441245633 | 0.51855737  | 0.63098182  | 0.189736187  | 1.48E-05    | 9.37E-05    |
| TSS200 | MYOD1    | 11 | 17740977/1774107<br>0/17740967                                    | 3 | cg07271264/cg22653<br>976/cg26410450                                          | 0.2867668   | 0.3895931   | 0.629171445 | 0.342404645  | 6.47E-10    | 1.59E-08    |
| TSS200 | MYOG     | 1  | 203055422/203055<br>479/203055507                                 | 3 | cg10901806/cg19251<br>719/cg23098069                                          | 0.599581802 | 0.494840748 | 0.423962858 | -0.175618944 | 1.12E-10    | 4.21E-09    |
| TSS200 | MYOT     | 5  | 137203424/137203<br>358                                           | 2 | cg13660086/cg21589<br>375                                                     | 0.676106598 | 0.591997544 | 0.515949066 | -0.160157532 | 2.69E-06    | 2.05E-05    |
| TSS200 | MYT1     | 20 | 62795688/6279580<br>7/62795658                                    | 3 | cg12828073/cg16772<br>207/cg21367256                                          | 0.676374315 | 0.59385585  | 0.461912716 | -0.214461599 | 1.48E-11    | 1.11E-09    |
| TSS200 | NAALADL1 | 11 | 64826135                                                          | 1 | cg27607805                                                                    | 0.50257657  | 0.393199961 | 0.313416773 | -0.189159797 | 2.11E-11    | 1.38E-09    |
| TSS200 | NALCN    | 13 | 102068989/102068<br>996/102069010                                 | 3 | cg10774877/cg15202<br>954/cg23056157                                          | 0.393140547 | 0.52235077  | 0.672534109 | 0.279393562  | 7.63E-10    | 1.81E-08    |
| TSS200 | NANOG    | 12 | 7941959                                                           | 1 | cg25540142                                                                    | 0.690967845 | 0.612211528 | 0.539083059 | -0.151884786 | 0.000354867 | 0.001622469 |
| TSS200 | NCAM2    | 21 | 22370444                                                          | 1 | cg02842227                                                                    | 0.258064435 | 0.334532006 | 0.424384645 | 0.16632021   | 8.23E-10    | 1.93E-08    |

|        |            |    |                                                                                                    |   |                                                                                                                        |             |             |             |              |          |             |
|--------|------------|----|----------------------------------------------------------------------------------------------------|---|------------------------------------------------------------------------------------------------------------------------|-------------|-------------|-------------|--------------|----------|-------------|
| TSS200 | NCAN       | 19 | 19322676/1932277<br>8/19322640/193226 4<br>78                                                      | 4 | cg08181476/cg13724<br>788/cg14316898/cg2<br>2090773                                                                    | 0.251505604 | 0.331823175 | 0.498386361 | 0.246880758  | 4.32E-07 | 3.98E-06    |
| TSS200 | NCR3       | 6  | 31560871/3156077<br>6                                                                              | 2 | cg08610982/cg23484<br>380                                                                                              | 0.384610105 | 0.311848406 | 0.229959132 | -0.154650973 | 1.96E-06 | 1.55E-05    |
| TSS200 | NCRNA00157 | 21 | 19258040                                                                                           | 1 | cg14288673                                                                                                             | 0.49441642  | 0.420160894 | 0.339186423 | -0.155229997 | 1.25E-09 | 2.69E-08    |
| TSS200 | NCRNA00162 | 21 | 46424834/4642475<br>3/46424715                                                                     | 3 | cg04070987/cg22495<br>068/cg22942384                                                                                   | 0.666334835 | 0.582441909 | 0.51051608  | -0.155818755 | 1.61E-11 | 1.17E-09    |
| TSS200 | NDRG4      | 16 | 58498574/5849739<br>5/58497815/584986<br>36/58498585/58497 8<br>801/58498710/5849<br>8754          | 8 | cg00262031/cg01466<br>678/cg02040433/cg0<br>4005075/cg06650115<br>/cg08791131/cg0932<br>4514/cg16812519                | 0.10765913  | 0.17862198  | 0.310097551 | 0.202438421  | 2.28E-06 | 1.77E-05    |
| TSS200 | NDST1      | 5  | 149887486/149887<br>497                                                                            | 2 | cg06677890/cg16674<br>484                                                                                              | 0.4413471   | 0.326739653 | 0.282865268 | -0.158481832 | 1.17E-12 | 2.37E-10    |
| TSS200 | NDST4      | 4  | 116035217/116035<br>082                                                                            | 2 | cg14204430/cg26869<br>131                                                                                              | 0.582727335 | 0.539693156 | 0.424504486 | -0.158222849 | 2.60E-06 | 1.99E-05    |
| TSS200 | NECAB1     | 8  | 91803805/9180379<br>2                                                                              | 2 | cg01026458/cg20040<br>743                                                                                              | 0.351661485 | 0.41792425  | 0.545203416 | 0.193541931  | 5.48E-08 | 6.51E-07    |
| TSS200 | NEFL       | 8  | 24814137                                                                                           | 1 | cg01614020                                                                                                             | 0.31224608  | 0.329022772 | 0.493136339 | 0.180890259  | 6.22E-05 | 0.000335838 |
| TSS200 | NEFM       | 8  | 24772435/2477235<br>0/24771259/247711<br>14/24771125/24772 9<br>344/24772270/2477<br>2333/24772309 | 9 | cg03169018/cg04118<br>306/cg07502389/cg0<br>9234518/cg16459364<br>/cg17078116/cg1967<br>7607/cg20585869/cg<br>22562942 | 0.411648573 | 0.464888808 | 0.577686086 | 0.166037513  | 1.41E-10 | 4.95E-09    |
| TSS200 | NELL1      | 11 | 20690934/2069093<br>0/20690957                                                                     | 3 | cg10824063/cg12071<br>328/cg17371081                                                                                   | 0.478953862 | 0.577332452 | 0.686328424 | 0.207374563  | 1.40E-08 | 2.01E-07    |
| TSS200 | NETO1      | 18 | 70533078/7053500<br>5                                                                              | 2 | cg13861749/cg18651<br>870                                                                                              | 0.6870667   | 0.5101433   | 0.36370005  | -0.32336665  | 1.42E-14 | 1.93E-11    |
| TSS200 | NGEF       | 2  | 233877969/233878<br>015/233878004/233 4<br>878150                                                  | 4 | cg04363282/cg06143<br>658/cg09312809/cg2<br>1998869                                                                    | 0.518786182 | 0.422450967 | 0.342445038 | -0.176341144 | 1.60E-10 | 5.42E-09    |
| TSS200 | NGF        | 1  | 115880865/115881<br>044/115880935                                                                  | 3 | cg09008705/cg13613<br>280/cg13804058                                                                                   | 0.223457763 | 0.326913945 | 0.504004302 | 0.28054654   | 9.98E-07 | 8.52E-06    |
| TSS200 | NHLH1      | 1  | 160336699/160336<br>712                                                                            | 2 | cg00006397/cg00881<br>010                                                                                              | 0.50540425  | 0.410566239 | 0.332137055 | -0.173267195 | 8.64E-09 | 1.35E-07    |
| TSS200 | NKAIN4     | 20 | 61886082/6188607<br>9/61885926                                                                     | 3 | cg01911708/cg08111<br>446/cg23942897                                                                                   | 0.236576717 | 0.36331312  | 0.519381209 | 0.282804493  | 3.66E-09 | 6.60E-08    |

|        |        |    |                                                                            |   |                                                                                              |             |             |             |              |             |             |
|--------|--------|----|----------------------------------------------------------------------------|---|----------------------------------------------------------------------------------------------|-------------|-------------|-------------|--------------|-------------|-------------|
| TSS200 | NKAPL  | 6  | 28226905/2822709<br>1/28227093/282270<br>85/28227068/28227<br>079          | 6 | cg00765128/cg01031<br>101/cg09523275/cg1<br>0253847/cg17384889<br>/cg18694169                | 0.472472486 | 0.579508745 | 0.649611709 | 0.177139223  | 3.90E-10    | 1.07E-08    |
| TSS200 | NKX2-2 | 20 | 21494712/2149468<br>9/21494748/214947<br>62/21494679/21494<br>831/21494716 | 7 | cg06178563/cg06624<br>291/cg07070391/cg1<br>1651285/cg16524928<br>/cg21409881/cg2226<br>5644 | 0.330671879 | 0.408267321 | 0.548217548 | 0.217545669  | 1.56E-06    | 1.27E-05    |
| TSS200 | NKX2-4 | 20 | 21378220/2137821<br>1/21378072/213782<br>27/21378200/21378<br>074          | 6 | cg05227131/cg21200<br>408/cg21200656/cg2<br>2204479/cg26156448<br>/cg27147819                | 0.227931307 | 0.268171764 | 0.413709508 | 0.185778202  | 7.06E-07    | 6.22E-06    |
| TSS200 | NKX2-6 | 8  | 23564008/2356403<br>1/23563925/235639<br>70/23564025                       | 5 | cg05477514/cg13324<br>546/cg14428146/cg1<br>5854847/cg20892260                               | 0.419070284 | 0.516927756 | 0.641974525 | 0.222904241  | 9.35E-12    | 7.90E-10    |
| TSS200 | NLRP6  | 11 | 278538/278394/278<br>462/278421/278403<br>/278450                          | 6 | cg03009397/cg09205<br>751/cg15451020/cg1<br>8016138/cg22331032<br>/cg23437420                | 0.597769605 | 0.511934688 | 0.433281844 | -0.164487761 | 9.01E-12    | 7.77E-10    |
| TSS200 | NMBR   | 6  | 142410100/142409<br>939/142410098/142<br>409993/142410061                  | 5 | cg17256157/cg17345<br>081/cg19233753/cg2<br>4924958/cg26365690                               | 0.353814663 | 0.463131303 | 0.595425561 | 0.241610899  | 2.22E-11    | 1.42E-09    |
| TSS200 | NPAS4  | 11 | 66188441/6618843<br>3                                                      | 2 | cg13215078/cg23484<br>234                                                                    | 0.236016241 | 0.321604036 | 0.514617661 | 0.278601421  | 5.85E-08    | 6.89E-07    |
| TSS200 | NPBWR1 | 8  | 53852274/5385244<br>3/53852422/538524<br>46                                | 4 | cg01559663/cg02237<br>470/cg07770968/cg1<br>8755296                                          | 0.356122273 | 0.446057847 | 0.591269406 | 0.235147133  | 6.86E-10    | 1.67E-08    |
| TSS200 | NPR3   | 5  | 32711517                                                                   | 1 | cg18261223                                                                                   | 0.083820478 | 0.107360912 | 0.28028821  | 0.196467732  | 7.90E-05    | 0.000418196 |
| TSS200 | NPY    | 7  | 24323767/2432379<br>2/24323799/243236<br>75/24323764                       | 5 | cg00355281/cg15929<br>698/cg16964348/cg2<br>4242823/cg24885417                               | 0.22485096  | 0.459305334 | 0.603738122 | 0.378887161  | 6.39E-11    | 2.84E-09    |
| TSS200 | NPY2R  | 4  | 156129735/156129<br>762/156129655/156<br>429725                            | 4 | cg03202738/cg14811<br>608/cg26384430/cg2<br>7504805                                          | 0.128974155 | 0.194864671 | 0.299241116 | 0.170266962  | 0.000452748 | 0.002017345 |
| TSS200 | NR1H4  | 12 | 100867509/100867<br>529                                                    | 2 | cg15381313/cg18874<br>332                                                                    | 0.437591085 | 0.358142175 | 0.284710657 | -0.152880428 | 1.26E-08    | 1.85E-07    |

|        |        |    |                                                                                           |    |                                                                                                               |             |             |             |              |             |             |
|--------|--------|----|-------------------------------------------------------------------------------------------|----|---------------------------------------------------------------------------------------------------------------|-------------|-------------|-------------|--------------|-------------|-------------|
| TSS200 | NR2E1  | 6  | 108487100/108487072/108487183/108487160/108487078/108487063                               | 6  | cg07411432/cg08616702/cg18093751/cg18918349/cg24104938/cg24225517                                             | 0.250054981 | 0.263668597 | 0.45908247  | 0.209027489  | 2.88E-05    | 0.000168797 |
| TSS200 | NRXN1  | 2  | 51259697/50574912/51259693/50575030/51259807/50575093/50575069/50575037/51259703/51259786 | 10 | cg03168108/cg03295083/cg05495351/cg10099415/cg13594075/cg13906811/cg17677030/cg18201351/cg22324022/cg25717438 | 0.253003499 | 0.31461233  | 0.405949359 | 0.15294586   | 6.55E-07    | 5.80E-06    |
| TSS200 | NTRK3  | 15 | 88799820/88799707                                                                         | 2  | cg13773705/cg21956337                                                                                         | 0.24426909  | 0.412779906 | 0.575837173 | 0.331568083  | 6.11E-07    | 5.45E-06    |
| TSS200 | NTRSR1 | 20 | 61340116/61340107/61340109                                                                | 3  | cg01539036/cg05295038/cg09893588                                                                              | 0.097805414 | 0.142690528 | 0.295746321 | 0.197940907  | 0.000317768 | 0.001469037 |
| TSS200 | NUAK1  | 12 | 106533903/106533840/106533867/106533898/106533863                                         | 5  | cg02518216/cg17393917/cg18525352/cg20060685/cg23555120                                                        | 0.496374778 | 0.653919296 | 0.726852429 | 0.230477651  | 1.71E-10    | 5.66E-09    |
| TSS200 | NWD1   | 19 | 16830613/16830749/16830746/16830739                                                       | 4  | cg15845821/cg19344626/cg19784428/cg20249566                                                                   | 0.429900116 | 0.353897649 | 0.271156008 | -0.158744108 | 1.55E-09    | 3.19E-08    |
| TSS200 | NXPH2  | 2  | 139537845/139537826/139537824                                                             | 3  | cg00804628/cg14923640/cg18150439                                                                              | 0.318403323 | 0.395305481 | 0.514745968 | 0.196342645  | 2.97E-11    | 1.68E-09    |
| TSS200 | OBP2A  | 9  | 138437868                                                                                 | 1  | cg08028341                                                                                                    | 0.55521711  | 0.46230235  | 0.397909868 | -0.157307242 | 9.37E-08    | 1.04E-06    |
| TSS200 | OBP2B  | 9  | 136084818                                                                                 | 1  | cg15538820                                                                                                    | 0.516362855 | 0.412994322 | 0.331981636 | -0.184381219 | 6.08E-11    | 2.75E-09    |
| TSS200 | ODZ4   | 11 | 79151719/79151814/79151791/79151811                                                       | 4  | cg04983516/cg05099909/cg05218311/cg09673208                                                                   | 0.120875758 | 0.168718308 | 0.297606181 | 0.176730423  | 0.00091667  | 0.003828117 |
| TSS200 | OLIG2  | 21 | 34398114/34398199/34398131/34398222/34398085/34398226                                     | 6  | cg03696345/cg08870743/cg15299832/cg23253569/cg27254482/cg27357571                                             | 0.254698848 | 0.380666611 | 0.584316247 | 0.329617399  | 6.39E-10    | 1.57E-08    |
| TSS200 | OLIG3  | 6  | 137815699/137815725/137815569/137815539/137815648/137815572                               | 6  | cg02550277/cg03093838/cg05262436/cg06918467/cg10632395/cg14726488                                             | 0.324246414 | 0.401423876 | 0.517361073 | 0.19311466   | 3.79E-07    | 3.54E-06    |
| TSS200 | OPCML  | 11 | 132813235/133402545/133402497/133402500/133402589                                         | 5  | cg08769451/cg15964611/cg16639665/cg23236270/cg24250669                                                        | 0.331918792 | 0.382152184 | 0.497281194 | 0.165362402  | 3.55E-06    | 2.62E-05    |

|        |        |    |                                             |   |                                                     |             |             |             |              |             |             |
|--------|--------|----|---------------------------------------------|---|-----------------------------------------------------|-------------|-------------|-------------|--------------|-------------|-------------|
| TSS200 | OPRK1  | 8  | 54164310/5416429<br>6/54164391/541643<br>74 | 4 | cg09999109/cg13405<br>783/cg16491617/cg2<br>5614094 | 0.334068585 | 0.414222804 | 0.575456953 | 0.241388368  | 3.47E-06    | 2.57E-05    |
| TSS200 | OPRM1  | 6  | 154360483/154360<br>351/154360344           | 3 | cg06649410/cg14262<br>937/cg22370006                | 0.335197423 | 0.401278389 | 0.521347702 | 0.18615028   | 4.46E-06    | 3.21E-05    |
| TSS200 | OR10A2 | 11 | 6890860                                     | 1 | cg09577324                                          | 0.467693435 | 0.370606628 | 0.265803114 | -0.201890321 | 5.64E-10    | 1.44E-08    |
| TSS200 | OR10A6 | 11 | 7950225                                     | 1 | cg00444390                                          | 0.602448615 | 0.459103683 | 0.296502964 | -0.305945651 | 1.38E-12    | 2.58E-10    |
| TSS200 | OR11A1 | 6  | 29395657                                    | 1 | cg16487621                                          | 0.716882105 | 0.675083656 | 0.537499155 | -0.17938295  | 6.52E-07    | 5.78E-06    |
| TSS200 | OR11J4 | 9  | 125281227                                   | 1 | cg24137660                                          | 0.44187848  | 0.3713173   | 0.252136536 | -0.189741944 | 1.27E-06    | 1.06E-05    |
| TSS200 | OR2A5  | 7  | 143747474/143747<br>422                     | 2 | cg07055879/cg08425<br>482                           | 0.593725525 | 0.494588533 | 0.425970782 | -0.167754743 | 1.03E-05    | 6.74E-05    |
| TSS200 | OR2G6  | 1  | 248684766                                   | 1 | cg25819275                                          | 0.735832695 | 0.613297533 | 0.421585591 | -0.314247104 | 1.96E-09    | 3.86E-08    |
| TSS200 | OR2L3  | 1  | 248223974                                   | 1 | cg21207403                                          | 0.536489    | 0.408806294 | 0.320260268 | -0.216228732 | 2.07E-09    | 4.03E-08    |
| TSS200 | OR2M3  | 1  | 248366332                                   | 1 | cg06393354                                          | 0.652677565 | 0.498601872 | 0.411762314 | -0.240915251 | 6.05E-09    | 9.93E-08    |
| TSS200 | OR2T3  | 1  | 248636455                                   | 1 | cg12085619                                          | 0.745767715 | 0.665975322 | 0.590819186 | -0.154948529 | 1.53E-07    | 1.58E-06    |
| TSS200 | OR4C12 | 11 | 50004210                                    | 1 | cg15690511                                          | 0.425303555 | 0.317127417 | 0.24445805  | -0.180845505 | 1.96E-12    | 3.21E-10    |
| TSS200 | OR4C46 | 11 | 51515083                                    | 1 | cg18369913                                          | 0.52651766  | 0.397022644 | 0.279748995 | -0.246768665 | 1.15E-13    | 6.70E-11    |
| TSS200 | OR4D1  | 17 | 56232499/5623235<br>7                       | 2 | cg12463722/cg22466<br>653                           | 0.62969987  | 0.522533925 | 0.401109232 | -0.228590638 | 5.02E-12    | 5.39E-10    |
| TSS200 | OR51E2 | 11 | 4719138                                     | 1 | cg25322008                                          | 0.40619577  | 0.323781111 | 0.251573682 | -0.154622088 | 1.52E-11    | 1.12E-09    |
| TSS200 | OR51M1 | 11 | 5410452                                     | 1 | cg27093637                                          | 0.659121375 | 0.532627261 | 0.382448045 | -0.27667333  | 9.75E-09    | 1.48E-07    |
| TSS200 | OR52A1 | 11 | 5173605                                     | 1 | cg22812280                                          | 0.70131895  | 0.619109628 | 0.49463495  | -0.206684    | 2.26E-06    | 1.77E-05    |
| TSS200 | OR52B2 | 11 | 6191635                                     | 1 | cg20213166                                          | 0.523759635 | 0.397554928 | 0.297644791 | -0.226114844 | 2.39E-12    | 3.81E-10    |
| TSS200 | OR52L1 | 11 | 6008246                                     | 1 | cg27480913                                          | 0.440982445 | 0.322647794 | 0.208424695 | -0.23255775  | 3.89E-15    | 1.23E-11    |
| TSS200 | OR52N2 | 11 | 5841482                                     | 1 | cg03895540                                          | 0.597053695 | 0.476309817 | 0.315040418 | -0.282013277 | 1.07E-13    | 6.48E-11    |
| TSS200 | OR5A1  | 11 | 59210634                                    | 1 | cg10919344                                          | 0.518778455 | 0.366911578 | 0.2463723   | -0.272406155 | 8.65E-14    | 5.93E-11    |
| TSS200 | OR5D16 | 11 | 55606216                                    | 1 | cg22937354                                          | 0.53126326  | 0.466551078 | 0.300326945 | -0.230936315 | 2.70E-07    | 2.63E-06    |
| TSS200 | OR5T1  | 11 | 56043040                                    | 1 | cg01464104                                          | 0.62377062  | 0.491010067 | 0.419395941 | -0.204374679 | 5.72E-06    | 3.99E-05    |
| TSS200 | OR5W2  | 11 | 55682099                                    | 1 | cg26349048                                          | 0.58245256  | 0.516382378 | 0.341970668 | -0.240481892 | 1.51E-11    | 1.12E-09    |
| TSS200 | OR6K2  | 1  | 158670617                                   | 1 | cg02245566                                          | 0.751338125 | 0.663984689 | 0.559207132 | -0.192130993 | 1.82E-05    | 0.000112937 |
| TSS200 | OR7A5  | 19 | 14939300                                    | 1 | cg25851651                                          | 0.728034585 | 0.677322967 | 0.573283773 | -0.154750812 | 0.000178057 | 0.000875242 |
| TSS200 | OR8B12 | 11 | 124413574/124413<br>728                     | 2 | cg03168749/cg25362<br>709                           | 0.720342223 | 0.607519542 | 0.452668577 | -0.267673645 | 2.23E-09    | 4.29E-08    |
| TSS200 | OR8B4  | 11 | 124294778                                   | 1 | cg24653728                                          | 0.6793003   | 0.600804211 | 0.507089673 | -0.172210627 | 9.48E-09    | 1.45E-07    |
| TSS200 | OR8J3  | 11 | 55905246                                    | 1 | cg11323650                                          | 0.578564595 | 0.408161344 | 0.2954314   | -0.283133195 | 3.06E-11    | 1.71E-09    |
| TSS200 | OSMR   | 5  | 38846034/3884576<br>2                       | 2 | cg02390103/cg19609<br>242                           | 0.330263328 | 0.417235351 | 0.549658657 | 0.219395329  | 2.12E-10    | 6.69E-09    |

|        |         |    |                                                                         |   |                                                                               |             |             |             |              |             |             |
|--------|---------|----|-------------------------------------------------------------------------|---|-------------------------------------------------------------------------------|-------------|-------------|-------------|--------------|-------------|-------------|
| TSS200 | OTP     | 5  | 76934693/7693463<br>4/76934696                                          | 3 | cg13378628/cg16691<br>593/cg21269843                                          | 0.281914829 | 0.337635057 | 0.48559508  | 0.203680251  | 9.69E-06    | 6.39E-05    |
| TSS200 | OTX2    | 14 | 57277227/5727736<br>6                                                   | 2 | cg15607672/cg26998<br>537                                                     | 0.388683973 | 0.487170308 | 0.585204866 | 0.196520893  | 7.09E-07    | 6.24E-06    |
| TSS200 | PABPC4L | 4  | 135122993                                                               | 1 | cg11815708                                                                    | 0.307129375 | 0.367251017 | 0.543101264 | 0.235971889  | 1.45E-06    | 1.19E-05    |
| TSS200 | PABPN1L | 16 | 88933182/8893307<br>0/88933068                                          | 3 | cg04587581/cg06076<br>690/cg08999742                                          | 0.5992099   | 0.496629044 | 0.401524527 | -0.197685373 | 9.64E-10    | 2.18E-08    |
| TSS200 | PALM2   | 9  | 112402882                                                               | 1 | cg02442436                                                                    | 0.23853382  | 0.350415644 | 0.511096645 | 0.272562825  | 2.03E-08    | 2.77E-07    |
| TSS200 | PAPPA2  | 1  | 176432162                                                               | 1 | cg02051981                                                                    | 0.49337363  | 0.386976028 | 0.308672577 | -0.184701053 | 7.39E-11    | 3.17E-09    |
| TSS200 | PAQR9   | 3  | 142682288/142682<br>291                                                 | 2 | cg15852572/cg27406<br>373                                                     | 0.081945404 | 0.091917814 | 0.253962734 | 0.17201733   | 0.000216837 | 0.001043105 |
| TSS200 | PARP12  | 7  | 139763542/139763<br>574/139763659                                       | 3 | cg21015022/cg22165<br>171/cg25279100                                          | 0.601529968 | 0.506477167 | 0.436651298 | -0.16487867  | 2.75E-10    | 8.14E-09    |
| TSS200 | PART1   | 5  | 59783629/5978366<br>8                                                   | 2 | cg09712066/cg18704<br>047                                                     | 0.422541028 | 0.342170589 | 0.270053657 | -0.152487371 | 1.05E-09    | 2.33E-08    |
| TSS200 | PATE1   | 11 | 125616118/125616<br>160/125616168                                       | 3 | cg02685436/cg05391<br>338/cg11283289                                          | 0.645320025 | 0.545441806 | 0.451285217 | -0.194034808 | 6.01E-09    | 9.88E-08    |
| TSS200 | PATE3   | 11 | 125657958                                                               | 1 | cg20737028                                                                    | 0.40751477  | 0.297983333 | 0.223018836 | -0.184495934 | 1.11E-08    | 1.66E-07    |
| TSS200 | PCDH10  | 4  | 134070437/134070<br>369/134070433/134<br>070389/134070441/<br>134070416 | 6 | cg01408654/cg02562<br>431/cg10524033/cg1<br>2746059/cg14400886<br>/cg27600205 | 0.277331374 | 0.356228214 | 0.532015105 | 0.254683731  | 1.35E-07    | 1.43E-06    |
| TSS200 | PCDH17  | 13 | 58205678                                                                | 1 | cg03865667                                                                    | 0.45875174  | 0.534007094 | 0.637959727 | 0.179207987  | 1.10E-09    | 2.42E-08    |
| TSS200 | PCDH24  | 5  | 175976342/175976<br>214/175976188                                       | 3 | cg02615833/cg09734<br>011/cg10462998                                          | 0.54325131  | 0.459487703 | 0.382872145 | -0.160379165 | 1.43E-10    | 4.99E-09    |
| TSS200 | PCDH8   | 13 | 53422847/5342286<br>0/53422871/534228<br>08/53422777/53422<br>780       | 6 | cg03315215/cg03850<br>426/cg16027761/cg1<br>7535595/cg19712603<br>/cg22763718 | 0.221548474 | 0.259730501 | 0.414794607 | 0.193246133  | 0.000648057 | 0.002788323 |
| TSS200 | PCDHA1  | 5  | 140165687                                                               | 1 | cg12150457                                                                    | 0.36141468  | 0.449483122 | 0.582886055 | 0.221471375  | 4.20E-06    | 3.03E-05    |
| TSS200 | PCDHA13 | 5  | 140261749/140261<br>697/140261663/140<br>261653/140261759/<br>140261810 | 6 | cg00275741/cg01202<br>150/cg02051771/cg1<br>9876814/cg25967418<br>/cg26556719 | 0.513958965 | 0.594796847 | 0.692800887 | 0.178841922  | 2.73E-10    | 8.10E-09    |
| TSS200 | PCDHA3  | 5  | 140180637/140180<br>691                                                 | 2 | cg01089834/cg19777<br>540                                                     | 0.405721173 | 0.513173864 | 0.625355866 | 0.219634693  | 1.31E-08    | 1.91E-07    |
| TSS200 | PCDHA7  | 5  | 140213795/140213<br>838/140213924/140<br>213783/140213825               | 5 | cg06827234/cg07745<br>166/cg12962191/cg1<br>8117367/cg26618441                | 0.473146746 | 0.556270029 | 0.65707222  | 0.183925474  | 1.27E-07    | 1.35E-06    |

|        |          |   |                                                           |   |                                                                |             |             |             |             |             |             |
|--------|----------|---|-----------------------------------------------------------|---|----------------------------------------------------------------|-------------|-------------|-------------|-------------|-------------|-------------|
| TSS200 | PCDHB1   | 5 | 140430921/140430<br>962/140430875                         | 3 | cg06827143/cg06899<br>976/cg12664940                           | 0.299211843 | 0.355705656 | 0.449979266 | 0.150767423 | 4.69E-05    | 0.000261262 |
| TSS200 | PCDHB15  | 5 | 140625059/140625<br>004/140625130/140<br>625068           | 4 | cg11368643/cg18664<br>869/cg23941075/cg2<br>4951286            | 0.505167158 | 0.592685225 | 0.668388075 | 0.163220918 | 1.16E-06    | 9.78E-06    |
| TSS200 | PCDHB18  | 5 | 140613869/140613<br>740/140613859/140<br>613884/140613820 | 5 | cg04511041/cg06302<br>533/cg11286063/cg1<br>8661205/cg27086874 | 0.358742672 | 0.469277813 | 0.591563247 | 0.232820575 | 9.37E-10    | 2.14E-08    |
| TSS200 | PCDHB19P | 5 | 140619567/140619<br>586                                   | 2 | cg10553103/cg25010<br>500                                      | 0.532207835 | 0.611180508 | 0.704408741 | 0.172200906 | 6.12E-07    | 5.46E-06    |
| TSS200 | PCDHGA11 | 5 | 140800495/140800<br>474/140800424/140<br>800398           | 4 | cg03892308/cg17857<br>974/cg18118262/cg2<br>6647197            | 0.420062418 | 0.588938167 | 0.720942086 | 0.300879669 | 2.99E-10    | 8.72E-09    |
| TSS200 | PCDHGA12 | 5 | 140810109/140810<br>137/140810123/140<br>810106/140810051 | 5 | cg02452944/cg07730<br>329/cg12304520/cg2<br>1627409/cg23082339 | 0.468492233 | 0.600537814 | 0.700518228 | 0.232025995 | 5.90E-10    | 1.48E-08    |
| TSS200 | PCDHGA2  | 5 | 140718339/140718<br>283/140718317                         | 3 | cg04830357/cg11011<br>625/cg18878616                           | 0.172768198 | 0.240883724 | 0.352288352 | 0.179520155 | 0.000380198 | 0.001724288 |
| TSS200 | PCDHGA3  | 5 | 140723455/140723<br>568/140723509/140<br>723583/140723549 | 5 | cg06742719/cg12608<br>145/cg14468658/cg1<br>7588578/cg18781988 | 0.481615587 | 0.554700815 | 0.650656171 | 0.169040585 | 1.24E-08    | 1.82E-07    |
| TSS200 | PCDHGA7  | 5 | 140762315/140762<br>305                                   | 2 | cg12459904/cg21908<br>557                                      | 0.369187088 | 0.449634844 | 0.564998014 | 0.195810926 | 2.91E-06    | 2.20E-05    |
| TSS200 | PCDHGB1  | 5 | 140729719/140729<br>813/140729653                         | 3 | cg12375722/cg21073<br>350/cg21161927                           | 0.384624802 | 0.46478868  | 0.587375938 | 0.202751136 | 2.07E-07    | 2.07E-06    |
| TSS200 | PCDHGB3  | 5 | 140749834/140749<br>783                                   | 2 | cg23348764/cg26337<br>998                                      | 0.269500098 | 0.335242484 | 0.422175191 | 0.152675093 | 0.000237891 | 0.001134353 |
| TSS200 | PCDHGB4  | 5 | 140767255/140767<br>364/140767412/140<br>767318           | 4 | cg00911351/cg07125<br>905/cg19734465/cg2<br>2648135            | 0.407194805 | 0.483649346 | 0.589756299 | 0.182561494 | 3.78E-08    | 4.75E-07    |
| TSS200 | PCDHGB5  | 5 | 140777607/140777<br>501/140777503/140<br>777611           | 4 | cg03608712/cg04553<br>690/cg08491188/cg2<br>4954590            | 0.424718165 | 0.474536371 | 0.611287741 | 0.186569576 | 6.81E-08    | 7.88E-07    |
| TSS200 | PCDHGB6  | 5 | 140787623                                                 | 1 | cg09465698                                                     | 0.5019589   | 0.657085994 | 0.708289209 | 0.206330309 | 2.52E-06    | 1.94E-05    |
| TSS200 | PCDHGB7  | 5 | 140797280/140797<br>172/140797234                         | 3 | cg10435816/cg13933<br>262/cg14011639                           | 0.411212445 | 0.552137115 | 0.66463272  | 0.253420275 | 3.73E-07    | 3.50E-06    |

|        |         |    |                                                                                                  |   |                                                                                                                        |             |             |             |              |             |             |
|--------|---------|----|--------------------------------------------------------------------------------------------------|---|------------------------------------------------------------------------------------------------------------------------|-------------|-------------|-------------|--------------|-------------|-------------|
| TSS200 | PCDHGC4 | 5  | 140864578/140864<br>593/140864701/140<br>864549/140864733                                        | 5 | cg02022733/cg03640<br>756/cg15361590/cg1<br>5949044/cg23445461                                                         | 0.296129086 | 0.459798741 | 0.667165305 | 0.371036219  | 4.48E-14    | 4.41E-11    |
| TSS200 | PCP4L1  | 1  | 161228455/161228<br>496                                                                          | 2 | cg10775792/cg27223<br>727                                                                                              | 0.101200112 | 0.089806782 | 0.263402179 | 0.162202067  | 0.000528043 | 0.002320063 |
| TSS200 | PDE1B   | 12 | 54943102/5494300<br>9/54954941                                                                   | 3 | cg00639886/cg13565<br>157/cg16643603                                                                                   | 0.118706076 | 0.218631614 | 0.362128276 | 0.2434222    | 4.01E-05    | 0.000227604 |
| TSS200 | PDE4D   | 5  | 59189791/5918978<br>8/59189724/591896<br>49                                                      | 4 | cg11258089/cg16261<br>871/cg22706610/cg2<br>6870744                                                                    | 0.322156955 | 0.360674003 | 0.494226345 | 0.17206939   | 2.42E-05    | 0.000145054 |
| TSS200 | PDGFD   | 11 | 104035151/104035<br>204/104035136/104<br>035087                                                  | 4 | cg03145963/cg08596<br>000/cg12027636/cg2<br>6756506                                                                    | 0.108127433 | 0.206495605 | 0.362922495 | 0.254795063  | 2.53E-06    | 1.95E-05    |
| TSS200 | PDPN    | 1  | 13910224/1391020<br>6/13910138/139101<br>64/13910209/13910<br>156                                | 6 | cg02933679/cg10743<br>104/cg11791751/cg1<br>5563963/cg16277479<br>/cg22436123                                          | 0.257968218 | 0.342812772 | 0.504722091 | 0.246753873  | 4.08E-07    | 3.78E-06    |
| TSS200 | PDZK1   | 1  | 145727720                                                                                        | 1 | cg13019092                                                                                                             | 0.549227525 | 0.440546956 | 0.3495518   | -0.199675725 | 4.71E-12    | 5.24E-10    |
| TSS200 | PEG10   | 7  | 94285501/9428552<br>0                                                                            | 2 | cg04366249/cg14388<br>858                                                                                              | 0.168816405 | 0.201851454 | 0.330592637 | 0.161776232  | 0.001810142 | 0.007093472 |
| TSS200 | PENK    | 8  | 57358651/5735871<br>3/57359414/573586<br>25/57359399                                             | 5 | cg03483150/cg04612<br>444/cg11060276/cg1<br>8742346/cg19149681                                                         | 0.401505867 | 0.50844703  | 0.65580363  | 0.254297764  | 4.42E-12    | 5.13E-10    |
| TSS200 | PER4    | 7  | 9673790                                                                                          | 1 | cg16465407                                                                                                             | 0.731968155 | 0.654732922 | 0.576260605 | -0.15570755  | 8.64E-05    | 0.000453967 |
| TSS200 | PEX5L   | 3  | 179754529/179754<br>603/179754615/179<br>754613/179754533/<br>179754521                          | 6 | cg02009585/cg02119<br>363/cg04894619/cg1<br>3473356/cg23346462<br>/cg23756251                                          | 0.273908536 | 0.36076177  | 0.479007376 | 0.20509884   | 3.91E-08    | 4.88E-07    |
| TSS200 | PHACTR1 | 6  | 12717790/1271777<br>6                                                                            | 2 | cg07279321/cg14931<br>071                                                                                              | 0.63859504  | 0.503514406 | 0.413683873 | -0.224911167 | 4.56E-09    | 7.96E-08    |
| TSS200 | PHF21B  | 22 | 45405827/4540590<br>4/45405627/454059<br>19/45405624/45405<br>768/45405880/4540<br>5899/45405621 | 9 | cg01995480/cg10080<br>155/cg15679813/cg1<br>6551454/cg20495645<br>/cg20525183/cg2308<br>0354/cg25561581/cg<br>25976257 | 0.078780276 | 0.106175468 | 0.245312103 | 0.166531827  | 3.75E-05    | 0.000214365 |
| TSS200 | PHOX2A  | 11 | 71955322/7195529<br>9/71955332/719554<br>01/71955337                                             | 5 | cg01670677/cg02910<br>180/cg04543008/cg0<br>5093169/cg11334771                                                         | 0.317748893 | 0.371521035 | 0.510596207 | 0.192847314  | 2.76E-06    | 2.10E-05    |



|        |          |    |                                                                                         |   |                                                                                                         |             |             |             |              |             |             |
|--------|----------|----|-----------------------------------------------------------------------------------------|---|---------------------------------------------------------------------------------------------------------|-------------|-------------|-------------|--------------|-------------|-------------|
| TSS200 | PIGR     | 1  | 207119987                                                                               | 1 | cg12751565                                                                                              | 0.491153695 | 0.397246378 | 0.320769264 | -0.170384431 | 4.23E-10    | 1.15E-08    |
| TSS200 | PIK3R5   | 17 | 8869105/8815843/8<br>869099/8869136/88<br>15876/8869213/881<br>5841/8869155             | 8 | cg01653005/cg08003<br>321/cg09359907/cg1<br>2863545/cg16672810<br>/cg16918989/cg2425<br>1850/cg26998044 | 0.337925005 | 0.451489235 | 0.507608275 | 0.169683271  | 4.75E-05    | 0.00026433  |
| TSS200 | PKD1L2   | 16 | 81254010/8125416<br>9/81254051                                                          | 3 | cg00908271/cg03406<br>106/cg06048169                                                                    | 0.679193025 | 0.587003689 | 0.46340112  | -0.215791905 | 5.90E-11    | 2.71E-09    |
| TSS200 | PKD2L2   | 5  | 137224967                                                                               | 1 | cg24330204                                                                                              | 0.464248035 | 0.607403861 | 0.648410059 | 0.184162024  | 6.00E-06    | 4.17E-05    |
| TSS200 | PKIA     | 8  | 79428313/7942832<br>5                                                                   | 2 | cg12850252/cg21612<br>207                                                                               | 0.059183456 | 0.124409844 | 0.294882193 | 0.235698737  | 0.000918545 | 0.003834931 |
| TSS200 | PLA2G2A  | 1  | 20307002                                                                                | 1 | cg11037787                                                                                              | 0.47784928  | 0.393858028 | 0.327697923 | -0.150151357 | 7.44E-10    | 1.78E-08    |
| TSS200 | PLA2G4F  | 15 | 42449015                                                                                | 1 | cg26350373                                                                                              | 0.545449265 | 0.425320756 | 0.330076345 | -0.21537292  | 9.06E-11    | 3.62E-09    |
| TSS200 | PLCB1    | 20 | 8113191                                                                                 | 1 | cg27591117                                                                                              | 0.198205965 | 0.268068172 | 0.419899173 | 0.221693208  | 2.90E-06    | 2.19E-05    |
| TSS200 | PLCH2    | 1  | 2407652/2407718                                                                         | 2 | cg11229415/cg21285<br>056                                                                               | 0.600133603 | 0.530291011 | 0.441910884 | -0.158222718 | 7.17E-06    | 4.90E-05    |
| TSS200 | PNLIPRP2 | 10 | 118380396/118380<br>345/118380370                                                       | 3 | cg01047476/cg15988<br>569/cg25120325                                                                    | 0.524042465 | 0.3830562   | 0.368410718 | -0.155631747 | 4.12E-06    | 2.98E-05    |
| TSS200 | PNMAL1   | 19 | 46974886/4697490<br>8/46974972                                                          | 3 | cg10788735/cg17787<br>159/cg22824998                                                                    | 0.214271869 | 0.310690015 | 0.389562009 | 0.175290141  | 2.47E-05    | 0.000147476 |
| TSS200 | PNOC     | 8  | 28174455                                                                                | 1 | cg13077562                                                                                              | 0.68826165  | 0.540080617 | 0.412117905 | -0.276143745 | 9.88E-10    | 2.22E-08    |
| TSS200 | PNPLA1   | 6  | 36238095/3623817<br>8/36238230/362380<br>43/36238213/36238<br>123                       | 6 | cg00980581/cg02683<br>846/cg17767484/cg1<br>8927901/cg23059700<br>/cg26681975                           | 0.569272611 | 0.49960711  | 0.413286681 | -0.15598593  | 1.19E-09    | 2.58E-08    |
| TSS200 | PNPLA5   | 22 | 44287876/4428795<br>8/44288021/442879<br>30/44287905                                    | 5 | cg04839422/cg11187<br>025/cg11250773/cg2<br>0377114/cg24534477                                          | 0.26159551  | 0.325538919 | 0.443201775 | 0.181606265  | 4.61E-05    | 0.000257839 |
| TSS200 | POU4F3   | 5  | 145718401/145718<br>405/145718392/145<br>718491                                         | 4 | cg01593834/cg05666<br>607/cg18369866/cg1<br>9974854                                                     | 0.326611139 | 0.396140022 | 0.518172249 | 0.19156111   | 3.24E-05    | 0.000187586 |
| TSS200 | PPFIA4   | 1  | 203020141                                                                               | 1 | cg09122593                                                                                              | 0.53092531  | 0.461835983 | 0.371604295 | -0.159321015 | 1.84E-07    | 1.87E-06    |
| TSS200 | PPM1E    | 17 | 56833096/5683306<br>0/56833076/568330<br>43/56833195/56833<br>099/56833197/5683<br>3201 | 8 | cg02071825/cg05264<br>587/cg08592707/cg1<br>1019211/cg14207210<br>/cg15386368/cg1940<br>1340/cg24526702 | 0.104678628 | 0.148781092 | 0.29684172  | 0.192163092  | 0.000242784 | 0.001156634 |

|        |          |    |                                                                                                                                                                             |    |                                                                                                                                                                                           |             |             |             |              |             |             |
|--------|----------|----|-----------------------------------------------------------------------------------------------------------------------------------------------------------------------------|----|-------------------------------------------------------------------------------------------------------------------------------------------------------------------------------------------|-------------|-------------|-------------|--------------|-------------|-------------|
| TSS200 | PPP1R16B | 20 | 37434231/3743416<br>7/37434229/374342<br>60/37434158/37434<br>262                                                                                                           | 6  | cg06207052/cg10305<br>789/cg11172693/cg1<br>2510981/cg15821319<br>/cg21656726                                                                                                             | 0.211792482 | 0.350361329 | 0.428409348 | 0.216616867  | 1.23E-05    | 7.93E-05    |
| TSS200 | PPP1R1B  | 17 | 37783011/3778471<br>1/37784699/377846<br>94                                                                                                                                 | 4  | cg00112517/cg06068<br>801/cg14697334/cg2<br>4520381                                                                                                                                       | 0.422967765 | 0.325790749 | 0.254840764 | -0.168127001 | 3.57E-12    | 4.62E-10    |
| TSS200 | PPP1R3A  | 7  | 113559086                                                                                                                                                                   | 1  | cg01214063                                                                                                                                                                                | 0.633804605 | 0.488613383 | 0.368097382 | -0.265707223 | 4.21E-08    | 5.20E-07    |
| TSS200 | PPP2R2B  | 5  | 146461045/146258<br>461/146258354/146<br>258189/146258181/<br>146258195/146258<br>237/146258512/146<br>258615/146258159/<br>146258522/146258<br>546/146258427/146<br>258463 | 14 | cg01987925/cg03659<br>005/cg03851984/cg0<br>4583285/cg08774231<br>/cg09528265/cg1182<br>6826/cg13971892/cg<br>13983063/cg1469311<br>2/cg15927927/cg250<br>21259/cg25149751/c<br>g25363885 | 0.217695908 | 0.273562204 | 0.409593783 | 0.191897875  | 9.71E-06    | 6.40E-05    |
| TSS200 | PPP2R2C  | 4  | 6383645                                                                                                                                                                     | 1  | cg01208224                                                                                                                                                                                | 0.638608455 | 0.569046378 | 0.463482045 | -0.17512641  | 1.18E-05    | 7.65E-05    |
| TSS200 | PPYR1    | 10 | 47083426/4708335<br>5/47083392/470833<br>42/47083398/47083<br>504                                                                                                           | 6  | cg02394955/cg04127<br>044/cg11861387/cg1<br>7771050/cg25344503<br>/cg25761626                                                                                                             | 0.439079737 | 0.525658706 | 0.618115232 | 0.179035495  | 4.77E-12    | 5.24E-10    |
| TSS200 | PRDM14   | 8  | 70983567/7098360<br>0/70983760/709837<br>41                                                                                                                                 | 4  | cg00384539/cg13267<br>264/cg21255438/cg2<br>7029821                                                                                                                                       | 0.365703203 | 0.439224286 | 0.567735724 | 0.202032521  | 0.000302036 | 0.001400827 |
| TSS200 | PREX2    | 8  | 68864549/6886454<br>6/68864523/688645<br>29                                                                                                                                 | 4  | cg15745900/cg17147<br>045/cg17459204/cg2<br>7467929                                                                                                                                       | 0.268288854 | 0.364995097 | 0.471921505 | 0.203632651  | 5.51E-06    | 3.86E-05    |
| TSS200 | PRKAR1B  | 7  | 767474/753007/767<br>490/752743/752292<br>/752715/752180/75<br>2632/752286/75262<br>4/752238/752979                                                                         | 12 | cg02943676/cg03982<br>150/cg06461306/cg1<br>2816748/cg13895235<br>/cg14835981/cg1630<br>5865/cg18091301/cg<br>18601167/cg1936366<br>9/cg20381963/cg220<br>84339                           | 0.385914153 | 0.486478513 | 0.615181921 | 0.229267768  | 7.57E-12    | 6.98E-10    |
| TSS200 | PRMT8    | 12 | 3600317/3600273/3<br>600229                                                                                                                                                 | 3  | cg06029846/cg07912<br>789/cg19656577                                                                                                                                                      | 0.22945001  | 0.254280452 | 0.390998177 | 0.161548168  | 2.04E-05    | 0.000124676 |

|        |          |    |                                              |   |                                                        |             |             |             |              |             |             |
|--------|----------|----|----------------------------------------------|---|--------------------------------------------------------|-------------|-------------|-------------|--------------|-------------|-------------|
| TSS200 | PRND     | 20 | 4702381/4702538/4702464/4702516              | 4 | cg04636876/cg05837890/cg12587930/cg24427947            | 0.745093789 | 0.581627543 | 0.455482394 | -0.289611394 | 4.00E-10    | 1.09E-08    |
| TSS200 | PROC     | 2  | 128175891/128175905                          | 2 | cg10021288/cg22856114                                  | 0.821833368 | 0.741553419 | 0.639526277 | -0.18230709  | 6.59E-07    | 5.83E-06    |
| TSS200 | PROCA1   | 17 | 27039032/27039058/27038886                   | 3 | cg03049691/cg10495754/cg14676825                       | 0.268143283 | 0.411542398 | 0.485133381 | 0.216990099  | 1.50E-07    | 1.56E-06    |
| TSS200 | PROKR2   | 20 | 5295137                                      | 1 | cg04354077                                             | 0.642575555 | 0.559678556 | 0.449269686 | -0.193305869 | 5.87E-09    | 9.70E-08    |
| TSS200 | PROM2    | 2  | 95940031/95940111                            | 2 | cg05989861/cg09664492                                  | 0.509402383 | 0.411794242 | 0.3444405   | -0.164961883 | 4.36E-10    | 1.17E-08    |
| TSS200 | PRSS1    | 7  | 142457299/142457284                          | 2 | cg02329916/cg14795939                                  | 0.652315815 | 0.469829786 | 0.349246105 | -0.30306971  | 3.62E-12    | 4.62E-10    |
| TSS200 | PRSS45   | 3  | 46786387                                     | 1 | cg21587375                                             | 0.5802546   | 0.449848272 | 0.313391259 | -0.266863341 | 1.77E-11    | 1.22E-09    |
| TSS200 | PRTN3    | 19 | 840873/840795/840950                         | 3 | cg12230709/cg17004025/cg23386659                       | 0.38018479  | 0.28710825  | 0.218288357 | -0.161896433 | 1.16E-11    | 9.36E-10    |
| TSS200 | PSCA     | 8  | 143761811/143761680/143761697                | 3 | cg00014754/cg02616368/cg13392302                       | 0.60395514  | 0.534282789 | 0.441146534 | -0.162808606 | 9.84E-12    | 8.25E-10    |
| TSS200 | PSG8     | 19 | 43269877/43269832                            | 2 | cg11387248/cg12109087                                  | 0.533947545 | 0.441007428 | 0.355234168 | -0.178713377 | 4.47E-12    | 5.15E-10    |
| TSS200 | PSORS1C2 | 6  | 31107186/31107321/31107240                   | 3 | cg07414487/cg13617087/cg26965877                       | 0.88972946  | 0.789996339 | 0.725275318 | -0.164454142 | 2.88E-05    | 0.000168679 |
| TSS200 | PTF1A    | 10 | 23481421/23481389/23481385                   | 3 | cg17076890/cg18920423/cg20014049                       | 0.270220597 | 0.266804783 | 0.422044574 | 0.151823976  | 0.000473334 | 0.002103562 |
| TSS200 | PTGFR    | 1  | 78956570                                     | 1 | cg24022301                                             | 0.332471    | 0.385515761 | 0.520876136 | 0.188405136  | 2.21E-06    | 1.73E-05    |
| TSS200 | PTH2     | 19 | 49926866/49926878/49926748                   | 3 | cg12986327/cg23996617/cg27103130                       | 0.24650308  | 0.313716275 | 0.411745373 | 0.165242293  | 0.000347415 | 0.001592093 |
| TSS200 | PTH2R    | 2  | 209271383/209271497/209271505                | 3 | cg01288372/cg23524735/cg25057743                       | 0.302449738 | 0.337687743 | 0.481392933 | 0.178943195  | 4.02E-05    | 0.000228252 |
| TSS200 | PTPLAD2  | 9  | 21031822                                     | 1 | cg14498666                                             | 0.382645655 | 0.535438133 | 0.649741386 | 0.267095731  | 2.57E-08    | 3.37E-07    |
| TSS200 | PTPN5    | 11 | 18813477/18813466/18813544/18813556/18813484 | 5 | cg06671842/cg07717429/cg13062406/cg16426537/cg18678353 | 0.395132593 | 0.490124489 | 0.591420466 | 0.196287873  | 0.000157886 | 0.000785397 |
| TSS200 | PTPRN    | 2  | 220174251/220174232/220174207/220174201      | 4 | cg01382864/cg03970036/cg10140638/cg16166796            | 0.453454794 | 0.549340568 | 0.676919491 | 0.223464697  | 1.49E-08    | 2.11E-07    |
| TSS200 | PTPRT    | 20 | 41818756/41818574                            | 2 | cg08413157/cg27625055                                  | 0.126841351 | 0.20140185  | 0.363025578 | 0.236184227  | 8.69E-08    | 9.73E-07    |
| TSS200 | PVRL4    | 1  | 161059535/161059458/161059429                | 3 | cg03166324/cg14158583/cg16557111                       | 0.534196657 | 0.444325406 | 0.354403842 | -0.179792814 | 2.31E-10    | 7.10E-09    |

|        |         |    |                                                            |   |                                                                   |             |             |             |              |             |             |
|--------|---------|----|------------------------------------------------------------|---|-------------------------------------------------------------------|-------------|-------------|-------------|--------------|-------------|-------------|
| TSS200 | PWRN1   | 15 | 24803245/24803181                                          | 2 | cg03402443/cg22884857                                             | 0.56207729  | 0.491806878 | 0.407357932 | -0.154719358 | 1.44E-09    | 2.98E-08    |
| TSS200 | PYGO1   | 15 | 55881162/55881246/55881083/55881075/55881089/55881081      | 6 | cg02715546/cg06364757/cg09275667/cg11480800/cg17841803/cg23030278 | 0.283902338 | 0.400563924 | 0.508187398 | 0.22428506   | 2.70E-06    | 2.06E-05    |
| TSS200 | PZP     | 12 | 9360986                                                    | 1 | cg08729600                                                        | 0.46703459  | 0.3780515   | 0.299266245 | -0.167768345 | 1.58E-10    | 5.38E-09    |
| TSS200 | QRFPR   | 4  | 122302276/12230268/122302226/122302331/122302232/122302265 | 6 | cg03356900/cg05604079/cg13643914/cg15105182/cg16999370/cg24727399 | 0.318385988 | 0.350584718 | 0.498228426 | 0.179842438  | 0.000246957 | 0.001170504 |
| TSS200 | R3HDM2  | 12 | 57704322                                                   | 1 | cg16346236                                                        | 0.826596475 | 0.766385589 | 0.668009077 | -0.158587398 | 3.41E-08    | 4.33E-07    |
| TSS200 | RAB25   | 1  | 156030844/156030809                                        | 2 | cg09243900/cg15896939                                             | 0.545682275 | 0.454175328 | 0.3636734   | -0.182008875 | 3.66E-10    | 1.02E-08    |
| TSS200 | RAB34   | 17 | 27045048/27045302/27045043                                 | 3 | cg08839210/cg19982230/cg21237418                                  | 0.468963962 | 0.569896974 | 0.648155276 | 0.179191314  | 1.39E-09    | 2.89E-08    |
| TSS200 | RADIL   | 7  | 4923383                                                    | 1 | cg27546065                                                        | 0.060555804 | 0.091632795 | 0.224144239 | 0.163588435  | 0.001739177 | 0.006847712 |
| TSS200 | RALYL   | 8  | 85095275/85097056/85095498/85095394/85097031/85097049      | 6 | cg00266009/cg04842146/cg05716166/cg16020747/cg21671806/cg23649708 | 0.300238937 | 0.341182228 | 0.527346692 | 0.227107755  | 3.69E-08    | 4.65E-07    |
| TSS200 | RARRES2 | 7  | 150038898                                                  | 1 | cg27494647                                                        | 0.588244105 | 0.641652089 | 0.757733695 | 0.16948959   | 1.19E-05    | 7.70E-05    |
| TSS200 | RASGRF1 | 15 | 79383413/79383385                                          | 2 | cg15156078/cg19431448                                             | 0.196443749 | 0.311090539 | 0.479263118 | 0.282819369  | 1.12E-08    | 1.67E-07    |
| TSS200 | RAX     | 18 | 56940767/56940755/56940693                                 | 3 | cg03074888/cg08724563/cg27019126                                  | 0.190562846 | 0.254722714 | 0.372007909 | 0.181445063  | 2.18E-08    | 2.94E-07    |
| TSS200 | REG1A   | 2  | 79347532/79347474                                          | 2 | cg16791528/cg23111544                                             | 0.593622985 | 0.47183715  | 0.376801032 | -0.216821953 | 2.62E-11    | 1.54E-09    |
| TSS200 | REG3G   | 2  | 79252794/79252673                                          | 2 | cg01357846/cg18145810                                             | 0.45832843  | 0.361260508 | 0.294910659 | -0.163417771 | 3.69E-10    | 1.03E-08    |
| TSS200 | REG4    | 1  | 120354250                                                  | 1 | cg07193534                                                        | 0.631496085 | 0.488209211 | 0.378247941 | -0.253248144 | 4.47E-11    | 2.21E-09    |
| TSS200 | RETNLB  | 3  | 108476278/108476163                                        | 2 | cg01287218/cg20441894                                             | 0.351536945 | 0.2460125   | 0.184027688 | -0.167509257 | 3.10E-12    | 4.37E-10    |
| TSS200 | RFPL1   | 22 | 29834550/29834420/29834388                                 | 3 | cg03012854/cg24246245/cg26288779                                  | 0.75423756  | 0.662904756 | 0.590332515 | -0.163905045 | 1.39E-08    | 2.00E-07    |
| TSS200 | RFPL3S  | 22 | 32767128/32767094/32767162/32767005                        | 4 | cg05484394/cg05544007/cg16655295/cg22217678                       | 0.735468285 | 0.628548556 | 0.525246669 | -0.210221616 | 9.66E-13    | 2.12E-10    |
| TSS200 | RFPL4B  | 6  | 112668522/112668401/112668454                              | 3 | cg00088428/cg13585985/cg21295811                                  | 0.744031847 | 0.639042052 | 0.553107327 | -0.190924519 | 3.09E-08    | 3.97E-07    |

|        |          |    |                                                                   |   |                                                                               |             |             |             |              |             |             |
|--------|----------|----|-------------------------------------------------------------------|---|-------------------------------------------------------------------------------|-------------|-------------|-------------|--------------|-------------|-------------|
| TSS200 | RFTN1    | 3  | 16555401/1655534<br>7/16555412/165553<br>11/16555379/16555<br>288 | 6 | cg09375878/cg17377<br>625/cg20660627/cg2<br>2044848/cg23718026<br>/cg23955684 | 0.086252716 | 0.116371045 | 0.242106302 | 0.155853587  | 0.001440909 | 0.005775723 |
| TSS200 | RGS13    | 1  | 192605253                                                         | 1 | cg05023691                                                                    | 0.610716955 | 0.517053761 | 0.459578459 | -0.151138496 | 5.94E-05    | 0.00032291  |
| TSS200 | RGS22    | 8  | 101118512/101118<br>377/101118525                                 | 3 | cg20051292/cg23208<br>513/cg24848035                                          | 0.27818651  | 0.360213028 | 0.499529882 | 0.221343372  | 7.30E-09    | 1.17E-07    |
| TSS200 | RGS6     | 14 | 72399591                                                          | 1 | cg01767732                                                                    | 0.21390877  | 0.249187733 | 0.369543673 | 0.155634903  | 0.000300595 | 0.001394965 |
| TSS200 | RGS7BP   | 5  | 63802280/6380241<br>2/63802272                                    | 3 | cg11359210/cg15426<br>956/cg17318297                                          | 0.201072582 | 0.295581207 | 0.449753811 | 0.248681229  | 1.05E-05    | 6.87E-05    |
| TSS200 | RICS     | 11 | 129062277                                                         | 1 | cg06466839                                                                    | 0.430118655 | 0.356806583 | 0.269111209 | -0.161007446 | 2.98E-11    | 1.68E-09    |
| TSS200 | RILP     | 17 | 1553585/1553415/1<br>553453/1553591/15<br>53502/1553484           | 6 | cg03044281/cg05548<br>425/cg08625564/cg1<br>9502936/cg23488607<br>/cg24096415 | 0.503475452 | 0.416796007 | 0.339952787 | -0.163522665 | 6.69E-10    | 1.64E-08    |
| TSS200 | RIPPLY2  | 6  | 84562908/8456288<br>8/84562788/845629<br>30/84562892/84562<br>928 | 6 | cg00270497/cg00575<br>005/cg01965173/cg0<br>8154348/cg16528511<br>/cg23215729 | 0.250136248 | 0.263950537 | 0.41576834  | 0.165632092  | 0.001667121 | 0.006596948 |
| TSS200 | RLBP1    | 15 | 89765061/8976504<br>5/89764999                                    | 3 | cg00376910/cg08746<br>496/cg20989926                                          | 0.622213552 | 0.453167837 | 0.37248542  | -0.249728132 | 7.58E-15    | 1.49E-11    |
| TSS200 | RNASE1   | 14 | 21270575/2127114<br>8                                             | 2 | cg05153345/cg12940<br>993                                                     | 0.77605042  | 0.640709322 | 0.522556386 | -0.253494034 | 3.10E-08    | 3.98E-07    |
| TSS200 | RNASE10  | 14 | 20978612/2097848<br>1                                             | 2 | cg01826623/cg03795<br>378                                                     | 0.836169018 | 0.752462458 | 0.678460773 | -0.157708245 | 1.38E-08    | 2.00E-07    |
| TSS200 | RNF126P1 | 17 | 55122828/5512274<br>7                                             | 2 | cg02486253/cg12636<br>325                                                     | 0.594525843 | 0.654717533 | 0.7485369   | 0.154011058  | 1.48E-08    | 2.10E-07    |
| TSS200 | RNF165   | 18 | 43914047                                                          | 1 | cg09730015                                                                    | 0.19832376  | 0.236244739 | 0.403254159 | 0.204930399  | 4.04E-05    | 0.000229336 |
| TSS200 | RNF222   | 17 | 8301192/8301166/8<br>301183                                       | 3 | cg00011924/cg03163<br>302/cg10218000                                          | 0.574430085 | 0.4375991   | 0.360629968 | -0.213800117 | 1.58E-09    | 3.24E-08    |
| TSS200 | RPGRIP1  | 14 | 21756040                                                          | 1 | cg18996099                                                                    | 0.766999555 | 0.680127089 | 0.584770718 | -0.182228837 | 8.25E-07    | 7.15E-06    |
| TSS200 | RPH3A    | 12 | 113229534/113229<br>392/113229362/113<br>229374/113229465         | 5 | cg09384610/cg16403<br>344/cg18629535/cg1<br>9712198/cg23596620                | 0.292809903 | 0.359079111 | 0.489106429 | 0.196296525  | 9.37E-06    | 6.21E-05    |
| TSS200 | RPL31P11 | 1  | 161655056/161655<br>124                                           | 2 | cg11174769/cg20491<br>963                                                     | 0.8127583   | 0.753215047 | 0.65513652  | -0.15762178  | 1.88E-06    | 1.50E-05    |
| TSS200 | RPL39L   | 3  | 186857284/186857<br>318/186857397/186<br>857389                   | 4 | cg05882938/cg06190<br>677/cg14370628/cg2<br>4524308                           | 0.146080201 | 0.219501346 | 0.340588902 | 0.194508701  | 0.000520674 | 0.002288963 |

|        |         |    |                                                                         |   |                                                                               |             |             |             |              |             |             |
|--------|---------|----|-------------------------------------------------------------------------|---|-------------------------------------------------------------------------------|-------------|-------------|-------------|--------------|-------------|-------------|
| TSS200 | RPS6KL1 | 14 | 75389222/7538928<br>0/75389200                                          | 3 | cg02858826/cg03394<br>422/cg18664866                                          | 0.766297618 | 0.672074637 | 0.574574129 | -0.19172349  | 3.79E-09    | 6.79E-08    |
| TSS200 | RSPO2   | 8  | 109095975/109095<br>951/109096064/109<br>096007/109095991/<br>109095918 | 6 | cg04549460/cg13177<br>747/cg13700897/cg1<br>6845394/cg22600043<br>/cg24807106 | 0.262442026 | 0.310940995 | 0.41345383  | 0.151011805  | 4.11E-07    | 3.80E-06    |
| TSS200 | RSPO3   | 6  | 127440000                                                               | 1 | cg19365062                                                                    | 0.081379366 | 0.202619072 | 0.399630693 | 0.318251327  | 2.08E-05    | 0.000126871 |
| TSS200 | RXFP3   | 5  | 33936402/3393630<br>7/33936362/339363<br>22/33936462/33936<br>292       | 6 | cg12238343/cg13349<br>651/cg13912115/cg1<br>5408073/cg26390889<br>/cg26986911 | 0.236808687 | 0.332395803 | 0.460501079 | 0.223692393  | 6.16E-05    | 0.000333522 |
| TSS200 | RXRG    | 1  | 165414583/165414<br>611/165414579/165<br>414514/165414491/<br>165414544 | 6 | cg01913568/cg08623<br>787/cg11717564/cg1<br>3901501/cg17885806<br>/cg22675486 | 0.212607257 | 0.287671093 | 0.400540364 | 0.187933106  | 1.28E-05    | 8.18E-05    |
| TSS200 | RYR1    | 19 | 38924182/3892428<br>2/38924185/389243<br>19/38924330                    | 5 | cg02026160/cg05304<br>622/cg11288278/cg1<br>1297107/cg27049517                | 0.134705266 | 0.165874668 | 0.287582128 | 0.152876862  | 0.000293771 | 0.001368128 |
| TSS200 | RYR3    | 15 | 33603026/3360307<br>0                                                   | 2 | cg24632756/cg25405<br>123                                                     | 0.182847468 | 0.237028529 | 0.349497715 | 0.166650247  | 8.11E-07    | 7.04E-06    |
| TSS200 | S100A14 | 1  | 153588927                                                               | 1 | cg13098855                                                                    | 0.48401158  | 0.394778033 | 0.323388595 | -0.160622985 | 8.97E-10    | 2.07E-08    |
| TSS200 | S100P   | 4  | 6695475/6695380/6<br>695377/6695464                                     | 4 | cg07210669/cg14140<br>379/cg14900031/cg2<br>5083732                           | 0.668117435 | 0.4932814   | 0.366300711 | -0.301816724 | 1.17E-12    | 2.37E-10    |
| TSS200 | S1PR4   | 19 | 3178759/3178742                                                         | 2 | cg20583073/cg27121<br>758                                                     | 0.58912087  | 0.487021958 | 0.40517907  | -0.1839418   | 2.94E-08    | 3.79E-07    |
| TSS200 | SALL1   | 16 | 51185346/5118458<br>3/51185236/511845<br>62                             | 4 | cg00310215/cg02864<br>757/cg06274671/cg0<br>8526074                           | 0.277403258 | 0.371629721 | 0.502743952 | 0.225340694  | 1.21E-07    | 1.30E-06    |
| TSS200 | SCEL    | 13 | 78109801                                                                | 1 | cg21063899                                                                    | 0.529078975 | 0.419898372 | 0.302566886 | -0.226512089 | 1.66E-12    | 2.84E-10    |
| TSS200 | SCGB1C1 | 11 | 193044/193021/192<br>996/192897/193062<br>/193016                       | 6 | cg02378673/cg03960<br>562/cg17345964/cg1<br>8793661/cg20297976<br>/cg22280333 | 0.602697462 | 0.490036682 | 0.398992062 | -0.2037054   | 1.21E-12    | 2.38E-10    |
| TSS200 | SCGB1D1 | 11 | 61957695                                                                | 1 | cg01772980                                                                    | 0.57206801  | 0.45797545  | 0.318077836 | -0.253990174 | 8.94E-13    | 2.12E-10    |
| TSS200 | SCNN1D  | 1  | 1217511                                                                 | 1 | cg00825734                                                                    | 0.446074995 | 0.360330078 | 0.294948259 | -0.151126736 | 5.99E-11    | 2.72E-09    |
| TSS200 | SDC2    | 8  | 97505843/9750576<br>4/97505788/975058<br>18/97505868                    | 5 | cg08979737/cg13096<br>260/cg18719750/cg2<br>4732574/cg25070637                | 0.138730784 | 0.195537039 | 0.319846831 | 0.181116047  | 0.000297231 | 0.001382259 |

|        |           |    |                                                                           |                                                                               |                                                                               |             |             |              |              |          |          |
|--------|-----------|----|---------------------------------------------------------------------------|-------------------------------------------------------------------------------|-------------------------------------------------------------------------------|-------------|-------------|--------------|--------------|----------|----------|
| TSS200 | SDCBP2    | 20 | 1310000/1294311/1<br>294361/1294376/12 5<br>94313                         | cg08443357/cg15645<br>491/cg21737976/cg2<br>1871261/cg23100411                | 0.399876965                                                                   | 0.30721735  | 0.232282209 | -0.167594756 | 6.43E-11     | 2.84E-09 |          |
| TSS200 | SDR16C5   | 8  | 57233391/5723337<br>3/57233314/572332 4<br>69                             | cg09038599/cg10700<br>380/cg16683508/cg2<br>1488289                           | 0.568808697                                                                   | 0.448989006 | 0.348119482 | -0.220689215 | 1.20E-10     | 4.38E-09 |          |
| TSS200 | SEC16B    | 1  | 177939225                                                                 | 1                                                                             | cg24974611                                                                    | 0.506462615 | 0.418321811 | 0.352042559  | -0.154420056 | 3.15E-10 | 9.11E-09 |
| TSS200 | SEC31B    | 10 | 102279703/102279<br>697/102279758/102 6<br>279690/102279694/<br>102279791 | cg00730561/cg04611<br>437/cg04835284/cg2<br>3725321/cg26458072<br>/cg26705561 | 0.481888908                                                                   | 0.58023177  | 0.68200556  | 0.200116652  | 8.08E-10     | 1.90E-08 |          |
| TSS200 | SELENBP1  | 1  | 151345248/151345<br>181/151345173                                         | 3                                                                             | cg07680533/cg24486<br>037/cg26065909                                          | 0.528834983 | 0.443050653 | 0.356088245  | -0.172746737 | 4.66E-08 | 5.66E-07 |
| TSS200 | SEMA4A    | 1  | 156123352                                                                 | 1                                                                             | cg21858764                                                                    | 0.538403395 | 0.428945944 | 0.365717314  | -0.172686081 | 4.01E-10 | 1.09E-08 |
| TSS200 | 12-Sep    | 16 | 4838559                                                                   | 1                                                                             | cg11353547                                                                    | 0.434620945 | 0.343855678 | 0.262169559  | -0.172451386 | 1.43E-10 | 4.99E-09 |
| TSS200 | SERINC4   | 15 | 44092345/4409231<br>4/44092398                                            | 3                                                                             | cg08278937/cg13793<br>048/cg26552774                                          | 0.771587202 | 0.705422983 | 0.594831842  | -0.176755359 | 5.23E-07 | 4.73E-06 |
| TSS200 | SERPINA10 | 14 | 94759767/9475964<br>6/94759743                                            | 3                                                                             | cg19937039/cg20599<br>748/cg21246665                                          | 0.42591855  | 0.321990706 | 0.254552289  | -0.171366261 | 5.28E-12 | 5.55E-10 |
| TSS200 | SERPINA11 | 14 | 94919295                                                                  | 1                                                                             | cg04461867                                                                    | 0.554117995 | 0.422035333 | 0.290875923  | -0.263242072 | 1.48E-11 | 1.11E-09 |
| TSS200 | SERPINA4  | 14 | 95027692                                                                  | 1                                                                             | cg05186455                                                                    | 0.526946425 | 0.421184128 | 0.343107968  | -0.183838457 | 1.64E-09 | 3.34E-08 |
| TSS200 | SERPINA6  | 14 | 94789853/9478977<br>7                                                     | 2                                                                             | cg09147827/cg09318<br>122                                                     | 0.398345665 | 0.3064748   | 0.243027064  | -0.155318601 | 3.47E-09 | 6.34E-08 |
| TSS200 | SERPINB12 | 18 | 61223377                                                                  | 1                                                                             | cg00005215                                                                    | 0.689158025 | 0.493514389 | 0.371855277  | -0.317302748 | 5.33E-11 | 2.53E-09 |
| TSS200 | SERPINB3  | 18 | 61329252                                                                  | 1                                                                             | cg03404572                                                                    | 0.501890355 | 0.411714367 | 0.315621232  | -0.186269123 | 3.81E-08 | 4.77E-07 |
| TSS200 | SERPINB5  | 18 | 61143961/6114394<br>5/61143993                                            | 3                                                                             | cg11862144/cg19022<br>006/cg26753302                                          | 0.582697615 | 0.421249333 | 0.317292064  | -0.265405551 | 2.04E-09 | 3.98E-08 |
| TSS200 | SFMBT2    | 10 | 7453455/7453507/7<br>453471/7453594/74 6<br>53511/7453452                 | 6                                                                             | cg02866454/cg07423<br>571/cg16818993/cg2<br>3056729/cg25433188<br>/cg26978668 | 0.167705009 | 0.31664858  | 0.443756978  | 0.276051969  | 1.10E-06 | 9.28E-06 |
| TSS200 | SFRP1     | 8  | 41167087/4116711<br>3/41167109/411671 5<br>07/41166990                    | 5                                                                             | cg01495122/cg10406<br>295/cg17816908/cg2<br>1517947/cg24319902                | 0.402568131 | 0.483173198 | 0.584995039  | 0.182426908  | 2.39E-08 | 3.19E-07 |

|        |         |    |                                                                       |   |                                                                              |             |             |             |              |             |             |
|--------|---------|----|-----------------------------------------------------------------------|---|------------------------------------------------------------------------------|-------------|-------------|-------------|--------------|-------------|-------------|
| TSS200 | SFRP2   | 4  | 154710353/154710418/154710371/154710399/154710421/154710425/154710373 | 7 | cg03202804/cg05164933/cg11354906/cg14330641/cg23121156/cg23292160/cg25775322 | 0.278165405 | 0.374927197 | 0.516227677 | 0.238062272  | 5.34E-06    | 3.74E-05    |
| TSS200 | SFRS13B | 6  | 89827915/89827912                                                     | 2 | cg00673557/cg23356850                                                        | 0.153346168 | 0.240254519 | 0.380549118 | 0.22720295   | 5.44E-05    | 0.000298278 |
| TSS200 | SFTA3   | 14 | 36983146/36983171/36983129                                            | 3 | cg10385303/cg16478719/cg23542968                                             | 0.240015405 | 0.31444001  | 0.406191697 | 0.166176292  | 3.63E-05    | 0.000207686 |
| TSS200 | SFTPA1  | 10 | 81370678                                                              | 1 | cg19183317                                                                   | 0.476576135 | 0.409494678 | 0.296817977 | -0.179758158 | 2.63E-08    | 3.44E-07    |
| TSS200 | SFTPD   | 10 | 81708991                                                              | 1 | cg03600318                                                                   | 0.47173821  | 0.382253356 | 0.303419691 | -0.168318519 | 3.16E-10    | 9.11E-09    |
| TSS200 | SGCZ    | 8  | 15095914                                                              | 1 | cg26247737                                                                   | 0.244888445 | 0.368719333 | 0.477364418 | 0.232475973  | 1.98E-06    | 1.57E-05    |
| TSS200 | SH3GL3  | 15 | 84116018/84115895/84115932/84115897/84115969                          | 5 | cg01667646/cg04779631/cg11797092/cg26215967/cg27021357                       | 0.186091531 | 0.245437704 | 0.396256235 | 0.210164704  | 0.0001259   | 0.000640014 |
| TSS200 | SHC3    | 9  | 91793721                                                              | 1 | cg26493353                                                                   | 0.139038882 | 0.243951039 | 0.390867054 | 0.251828172  | 0.000103698 | 0.000536661 |
| TSS200 | SHISA2  | 13 | 26625273/26625307/26625396/26625317/26625325/26625359                 | 6 | cg00099976/cg00109356/cg03099431/cg08386692/cg09668400/cg17830985            | 0.355392107 | 0.458862792 | 0.58670131  | 0.231309203  | 1.06E-08    | 1.60E-07    |
| TSS200 | SHISA9  | 16 | 12995292/12995300/12995296                                            | 3 | cg02860732/cg03057083/cg04342955                                             | 0.259598656 | 0.369636269 | 0.595409569 | 0.335810913  | 3.26E-06    | 2.43E-05    |
| TSS200 | SIAH3   | 13 | 46425999/46425866/46425929/46425904/46426026/46425874                 | 6 | cg02017534/cg08018585/cg12979844/cg14269973/cg25658983/cg26667946            | 0.431872835 | 0.507638368 | 0.61389035  | 0.182017515  | 5.38E-05    | 0.000295599 |
| TSS200 | SIM1    | 6  | 100911701/100911746/100911687/100911727/100911709/100911744           | 6 | cg04927931/cg08133486/cg11471772/cg11891393/cg21063722/cg22478310            | 0.31500923  | 0.3846802   | 0.592480535 | 0.277471305  | 3.30E-08    | 4.20E-07    |
| TSS200 | SIRPB1  | 20 | 1600705                                                               | 1 | cg09577651                                                                   | 0.402374255 | 0.300649072 | 0.251513979 | -0.150860276 | 1.26E-06    | 1.05E-05    |
| TSS200 | SIRPD   | 20 | 1538366/1538353                                                       | 2 | cg01247127/cg11295724                                                        | 0.671586475 | 0.492569622 | 0.370846718 | -0.300739757 | 2.34E-14    | 2.83E-11    |
| TSS200 | SIX6    | 14 | 60975811/60975837/60975846/60975841/60975912                          | 5 | cg08132837/cg14611174/cg18639233/cg20576153/cg20585530                       | 0.270983193 | 0.353799089 | 0.500806855 | 0.229823662  | 3.34E-08    | 4.24E-07    |
| TSS200 | SLAMF7  | 1  | 160708987/160708990                                                   | 2 | cg04244970/cg07837085                                                        | 0.579450968 | 0.44451915  | 0.339808134 | -0.239642833 | 2.68E-08    | 3.50E-07    |
| TSS200 | SLC13A5 | 17 | 6616799/6616883/6616867                                               | 3 | cg08049640/cg12146546/cg13781853                                             | 0.141488693 | 0.245602827 | 0.417813991 | 0.276325299  | 0.000448817 | 0.002001528 |



|        |          |    |                                                           |   |                                                                |             |             |             |              |             |             |
|--------|----------|----|-----------------------------------------------------------|---|----------------------------------------------------------------|-------------|-------------|-------------|--------------|-------------|-------------|
| TSS200 | SLC16A4  | 1  | 110933767                                                 | 1 | cg00961640                                                     | 0.6624791   | 0.489536761 | 0.375002668 | -0.287476432 | 9.29E-13    | 2.12E-10    |
| TSS200 | SLC18A2  | 10 | 119000638                                                 | 1 | cg15173134                                                     | 0.378897845 | 0.376248644 | 0.554818941 | 0.175921096  | 0.000199022 | 0.000966251 |
| TSS200 | SLC18A3  | 10 | 50818153/5081829<br>9                                     | 2 | cg02728050/cg11389<br>172                                      | 0.289713635 | 0.359840561 | 0.472400116 | 0.182686481  | 3.02E-05    | 0.000176143 |
| TSS200 | SLC22A17 | 14 | 23821596/2382157<br>0/23822265                            | 3 | cg15476528/cg23411<br>440/cg23464698                           | 0.17715308  | 0.178381296 | 0.343550598 | 0.166397518  | 0.000367977 | 0.001675608 |
| TSS200 | SLC22A8  | 11 | 62783482/6278339<br>4/62783361/627833<br>86               | 4 | cg08288703/cg10068<br>408/cg18305416/cg2<br>2907415            | 0.548348963 | 0.487710039 | 0.395285835 | -0.153063127 | 6.10E-10    | 1.52E-08    |
| TSS200 | SLC22A9  | 11 | 63137125/6313715<br>2                                     | 2 | cg07751764/cg23683<br>201                                      | 0.571637175 | 0.474130622 | 0.370182582 | -0.201454593 | 5.55E-10    | 1.42E-08    |
| TSS200 | SLC23A3  | 2  | 220034947                                                 | 1 | cg27264181                                                     | 0.6316455   | 0.514063856 | 0.407961059 | -0.223684441 | 3.80E-12    | 4.74E-10    |
| TSS200 | SLC24A4  | 14 | 92790097/9278891<br>4/92790072                            | 3 | cg01802258/cg14512<br>346/cg24766334                           | 0.349080048 | 0.436036108 | 0.505370111 | 0.156290064  | 1.24E-05    | 7.95E-05    |
| TSS200 | SLC25A26 | 3  | 66119234/6611909<br>4/66119154                            | 3 | cg02784780/cg07847<br>658/cg15364450                           | 0.763605135 | 0.637503167 | 0.509974241 | -0.253630894 | 7.40E-09    | 1.18E-07    |
| TSS200 | SLC25A41 | 19 | 6433825/6433858                                           | 2 | cg13742513/cg26851<br>500                                      | 0.597148808 | 0.465674269 | 0.365551309 | -0.231597498 | 3.00E-10    | 8.76E-09    |
| TSS200 | SLC26A1  | 4  | 987391/987303                                             | 2 | cg15138543/cg21616<br>051                                      | 0.564887935 | 0.427673722 | 0.334574214 | -0.230313721 | 3.69E-11    | 1.92E-09    |
| TSS200 | SLC26A9  | 1  | 205897545/205912<br>646                                   | 2 | cg02117416/cg09852<br>221                                      | 0.747889415 | 0.690168417 | 0.584144264 | -0.163745151 | 1.73E-06    | 1.39E-05    |
| TSS200 | SLC27A5  | 19 | 59023484/5902353<br>7                                     | 2 | cg16278661/cg18495<br>710                                      | 0.498341008 | 0.403756028 | 0.332026557 | -0.166314451 | 8.90E-11    | 3.57E-09    |
| TSS200 | SLC27A6  | 5  | 128301136/128301<br>156/128301185/128<br>301083/128301146 | 5 | cg07421806/cg09538<br>995/cg13985726/cg1<br>4441976/cg15899948 | 0.229054425 | 0.288089102 | 0.458344828 | 0.229290403  | 2.95E-05    | 0.000172482 |
| TSS200 | SLC30A8  | 8  | 118147200/118147<br>163/118147191                         | 3 | cg07061355/cg07459<br>489/cg09439192                           | 0.753967547 | 0.688790974 | 0.591915073 | -0.162052474 | 5.28E-08    | 6.29E-07    |
| TSS200 | SLC32A1  | 20 | 37353032/3735309<br>6/37353037/373530<br>35               | 4 | cg07033372/cg10615<br>414/cg12180703/cg2<br>5307168            | 0.332205109 | 0.399512449 | 0.502594101 | 0.170388992  | 1.39E-10    | 4.91E-09    |
| TSS200 | SLC34A1  | 5  | 176811257/176811<br>305/176811239                         | 3 | cg06501790/cg14819<br>088/cg18126247                           | 0.712696443 | 0.659663114 | 0.528137007 | -0.184559436 | 1.07E-08    | 1.60E-07    |
| TSS200 | SLC35F4  | 14 | 58063811/5806372<br>7                                     | 2 | cg04913974/cg13998<br>988                                      | 0.554431965 | 0.460712758 | 0.343836684 | -0.210595281 | 8.85E-11    | 3.57E-09    |
| TSS200 | SLC36A3  | 5  | 150683530                                                 | 1 | cg01678321                                                     | 0.799630055 | 0.744428944 | 0.595900532 | -0.203729523 | 4.84E-06    | 3.44E-05    |

|        |         |    |                                                                                                                 |                                                                                                                        |             |             |             |              |             |             |
|--------|---------|----|-----------------------------------------------------------------------------------------------------------------|------------------------------------------------------------------------------------------------------------------------|-------------|-------------|-------------|--------------|-------------|-------------|
| TSS200 | SLC39A4 | 8  | 145641991/145642<br>295/145642456/145<br>641996/145642114/ 9<br>145642024/145642<br>291/145642421/145<br>642018 | cg00065570/cg04803<br>798/cg05574324/cg0<br>7933378/cg08969922<br>/cg09155025/cg1180<br>0672/cg12503742/cg<br>23697467 | 0.541852177 | 0.45510863  | 0.375549739 | -0.166302438 | 7.94E-11    | 3.31E-09    |
| TSS200 | SLC43A3 | 11 | 57195187/5719456 2                                                                                              | cg00354381/cg07326<br>438                                                                                              | 0.074301857 | 0.106917992 | 0.286199424 | 0.211897568  | 0.000713689 | 0.003047432 |
| TSS200 | SLC44A4 | 6  | 31846970/3184695<br>6/31846996/318468 6<br>99/31846924/31847<br>009                                             | cg03045620/cg04567<br>302/cg07363637/cg2<br>1236501/cg24529722<br>/cg24707219                                          | 0.504383783 | 0.4257982   | 0.35223017  | -0.152153612 | 1.58E-11    | 1.16E-09    |
| TSS200 | SLC45A4 | 8  | 142238752/142238<br>770/142238691 3                                                                             | cg01081737/cg07769<br>015/cg15586392                                                                                   | 0.457864923 | 0.357061217 | 0.275025271 | -0.182839652 | 2.57E-11    | 1.54E-09    |
| TSS200 | SLC5A11 | 16 | 24857497 1                                                                                                      | cg00339695                                                                                                             | 0.489326095 | 0.384489094 | 0.322641955 | -0.16668414  | 9.21E-10    | 2.11E-08    |
| TSS200 | SLC5A4  | 22 | 32651345 1                                                                                                      | cg21578906                                                                                                             | 0.51292286  | 0.4029516   | 0.323956227 | -0.188966633 | 9.21E-13    | 2.12E-10    |
| TSS200 | SLC5A7  | 2  | 108602906/108602<br>860/108602931/108 5<br>602937/108602979                                                     | cg05311412/cg11355<br>135/cg14613271/cg1<br>8771173/cg26001902                                                         | 0.412205918 | 0.439223517 | 0.638806236 | 0.226600319  | 8.15E-06    | 5.48E-05    |
| TSS200 | SLC6A1  | 3  | 11034279/1103431<br>1/11034345/110342 4<br>81                                                                   | cg11021744/cg15445<br>554/cg16164276/cg2<br>3405575                                                                    | 0.262292329 | 0.307416941 | 0.515257988 | 0.252965659  | 1.40E-05    | 8.89E-05    |
| TSS200 | SLC6A11 | 3  | 10857798/1085779<br>5/10857719/108577 5<br>17/10857800                                                          | cg09022422/cg10527<br>010/cg21123160/cg2<br>2331862/cg26836233                                                         | 0.441025074 | 0.509574136 | 0.611106668 | 0.170081594  | 1.03E-12    | 2.19E-10    |
| TSS200 | SLC6A15 | 12 | 85306797/8530674 3<br>1/85306648                                                                                | cg14510812/cg17222<br>500/cg21702506                                                                                   | 0.26073564  | 0.350206439 | 0.474285445 | 0.213549805  | 8.44E-06    | 5.66E-05    |
| TSS200 | SLC6A2  | 16 | 55690378/5569044 3<br>3/55690381                                                                                | cg03226000/cg09321<br>400/cg09774787                                                                                   | 0.439240143 | 0.578017011 | 0.686536679 | 0.247296535  | 4.01E-08    | 4.98E-07    |
| TSS200 | SLC6A3  | 5  | 1445561/1445593/1 4<br>445549/1445567                                                                           | cg04210284/cg05030<br>481/cg12882697/cg2<br>7037018                                                                    | 0.250250824 | 0.253240823 | 0.419007345 | 0.168756522  | 0.00056613  | 0.002464745 |
| TSS200 | SLC6A5  | 11 | 20620830/2062085<br>4/20620824/206209 5<br>14/20620920                                                          | cg04642741/cg06804<br>921/cg08530317/cg1<br>6635352/cg20551181                                                         | 0.303545038 | 0.408895462 | 0.503909556 | 0.200364519  | 9.40E-08    | 1.04E-06    |
| TSS200 | SLC7A13 | 8  | 87242630 1                                                                                                      | cg14588399                                                                                                             | 0.563304845 | 0.42473725  | 0.384666373 | -0.178638472 | 5.32E-09    | 8.93E-08    |

|        |          |    |                                                                                         |   |                                                                                              |             |             |             |              |             |             |
|--------|----------|----|-----------------------------------------------------------------------------------------|---|----------------------------------------------------------------------------------------------|-------------|-------------|-------------|--------------|-------------|-------------|
| TSS200 | SLC8A3   | 14 | 70655871/7065586<br>2/70655920/706558<br>05/70655845/70655<br>803                       | 6 | cg08265644/cg14174<br>099/cg14358879/cg2<br>1512124/cg23609571<br>/cg23702412                | 0.065894933 | 0.154513577 | 0.27919208  | 0.213297148  | 9.38E-05    | 0.000490236 |
| TSS200 | SLCO4C1  | 5  | 101632341/101632<br>286/101632321/101<br>632372/101632327/ 7<br>101632310/101632<br>314 | 7 | cg04621020/cg04633<br>600/cg06480736/cg1<br>1009817/cg11267955<br>/cg19788741/cg2214<br>9516 | 0.094948704 | 0.147271233 | 0.314547799 | 0.219599095  | 0.000267481 | 0.001258324 |
| TSS200 | SLFN11   | 17 | 33700757/3370080<br>1/33700817/337007<br>47/33700759/33700<br>745                       | 6 | cg01348733/cg05224<br>998/cg10911913/cg1<br>4380270/cg18608369<br>/cg26573518                | 0.127703475 | 0.233569838 | 0.330782992 | 0.203079518  | 2.25E-06    | 1.76E-05    |
| TSS200 | SLFN13   | 17 | 33775963/3377593<br>3/33775917/337758<br>60/33775961/33775<br>952                       | 6 | cg04354393/cg04862<br>556/cg08151705/cg1<br>2788037/cg13443575<br>/cg16563370                | 0.341152953 | 0.391982763 | 0.494026305 | 0.152873353  | 9.88E-07    | 8.44E-06    |
| TSS200 | SLFNL1   | 1  | 41487437/4148740<br>8                                                                   | 2 | cg22005565/cg22435<br>441                                                                    | 0.77349496  | 0.682462194 | 0.590677959 | -0.182817001 | 7.69E-08    | 8.73E-07    |
| TSS200 | SLIT2    | 4  | 20255082/2025506<br>1/20255187                                                          | 3 | cg13078140/cg13281<br>139/cg15469350                                                         | 0.337305058 | 0.451698381 | 0.642086455 | 0.304781397  | 4.29E-10    | 1.16E-08    |
| TSS200 | SLIT3    | 5  | 168728193/168728<br>213/168728270/168<br>728149/168728236                               | 5 | cg02403292/cg14658<br>804/cg15637465/cg1<br>5927720/cg26492514                               | 0.339987309 | 0.422433059 | 0.582153003 | 0.242165694  | 2.47E-06    | 1.91E-05    |
| TSS200 | SLITRK1  | 13 | 84456722/8445654<br>7/84456681                                                          | 3 | cg13988851/cg14246<br>335/cg25938646                                                         | 0.342205445 | 0.423133528 | 0.528081884 | 0.185876439  | 4.63E-08    | 5.63E-07    |
| TSS200 | SLITRK5  | 13 | 88324711                                                                                | 1 | cg17967577                                                                                   | 0.27742316  | 0.270804299 | 0.542421245 | 0.264998085  | 2.61E-06    | 2.00E-05    |
| TSS200 | SLN      | 11 | 107582818/107582<br>876/107582804/107<br>582884                                         | 4 | cg11117131/cg16476<br>427/cg17971003/cg2<br>4307368                                          | 0.472451895 | 0.382161665 | 0.29869123  | -0.173760665 | 4.81E-12    | 5.24E-10    |
| TSS200 | SLURP1   | 8  | 143823917/143824<br>001/143823898                                                       | 3 | cg06565975/cg07441<br>143/cg13411229                                                         | 0.536085418 | 0.446243831 | 0.361320815 | -0.174764603 | 9.25E-12    | 7.88E-10    |
| TSS200 | SMTNL1   | 11 | 57308952/5730888<br>8                                                                   | 2 | cg17039830/cg26445<br>999                                                                    | 0.822588333 | 0.739956269 | 0.649863727 | -0.172724605 | 4.24E-07    | 3.91E-06    |
| TSS200 | SNAP91   | 6  | 84419244/8441920<br>2/84419189/844192<br>34/84419242/84419<br>237                       | 6 | cg09227138/cg17767<br>285/cg18213472/cg1<br>9671533/cg20631014<br>/cg24842733                | 0.291554167 | 0.335079723 | 0.497929821 | 0.206375655  | 1.79E-06    | 1.43E-05    |
| TSS200 | SNORA14A | 7  | 75573071                                                                                | 1 | cg10902139                                                                                   | 0.850573725 | 0.784973744 | 0.687199564 | -0.163374161 | 0.000107963 | 0.000557819 |
| TSS200 | SNORA8   | 11 | 93465688                                                                                | 1 | cg15924285                                                                                   | 0.45951232  | 0.357257767 | 0.288638668 | -0.170873652 | 5.11E-10    | 1.33E-08    |
| TSS200 | SNORA80B | 2  | 10587052                                                                                | 1 | cg15075241                                                                                   | 0.66628874  | 0.490802811 | 0.352196073 | -0.314092667 | 7.97E-14    | 5.71E-11    |

|        |             |    |                                                       |   |                                                                   |             |             |             |              |             |             |
|--------|-------------|----|-------------------------------------------------------|---|-------------------------------------------------------------------|-------------|-------------|-------------|--------------|-------------|-------------|
| TSS200 | SNORD113-1  | 14 | 101390989                                             | 1 | cg07010373                                                        | 0.521743515 | 0.41395475  | 0.333578095 | -0.18816542  | 7.84E-10    | 1.86E-08    |
| TSS200 | SNORD113-4  | 14 | 101402822                                             | 1 | cg04784410                                                        | 0.323328705 | 0.211694711 | 0.149351969 | -0.173976736 | 1.93E-13    | 9.53E-11    |
| TSS200 | SNORD113-6  | 14 | 101405693/101405755/101405842                         | 3 | cg04262465/cg09293488/cg25045972                                  | 0.725350198 | 0.627180839 | 0.534762498 | -0.1905877   | 6.76E-08    | 7.84E-07    |
| TSS200 | SNORD114-1  | 14 | 101416128                                             | 1 | cg20052865                                                        | 0.4111624   | 0.274981028 | 0.194244682 | -0.216917718 | 5.65E-13    | 1.75E-10    |
| TSS200 | SNORD114-10 | 14 | 101433314                                             | 1 | cg10931901                                                        | 0.734299255 | 0.61662955  | 0.476671109 | -0.257628146 | 1.88E-08    | 2.58E-07    |
| TSS200 | SNORD114-25 | 14 | 101452368                                             | 1 | cg10472263                                                        | 0.581028335 | 0.443832711 | 0.374705109 | -0.206323226 | 1.97E-12    | 3.21E-10    |
| TSS200 | SNORD115-37 | 15 | 25483088                                              | 1 | cg17208360                                                        | 0.649078055 | 0.557369589 | 0.416258845 | -0.23281921  | 8.27E-08    | 9.31E-07    |
| TSS200 | SNORD115-40 | 15 | 25488753                                              | 1 | cg00361898                                                        | 0.72299292  | 0.607727211 | 0.523623586 | -0.199369334 | 1.34E-07    | 1.41E-06    |
| TSS200 | SNORD116-11 | 15 | 25320886                                              | 1 | cg04524239                                                        | 0.749921535 | 0.72353905  | 0.594504673 | -0.155416862 | 9.00E-06    | 6.00E-05    |
| TSS200 | SNORD116-15 | 15 | 25326263                                              | 1 | cg20385284                                                        | 0.743657135 | 0.674473917 | 0.563627091 | -0.180030044 | 2.13E-06    | 1.68E-05    |
| TSS200 | SNORD116-16 | 15 | 25327713                                              | 1 | cg17198397                                                        | 0.63367499  | 0.559752922 | 0.464799609 | -0.168875381 | 3.45E-06    | 2.55E-05    |
| TSS200 | SNORD116-23 | 15 | 25336770                                              | 1 | cg17727579                                                        | 0.66721669  | 0.580290561 | 0.464517673 | -0.202699017 | 3.61E-07    | 3.40E-06    |
| TSS200 | SNORD116-4  | 15 | 25304609/25304625                                     | 2 | cg06502456/cg11063170                                             | 0.70877131  | 0.634176611 | 0.535065177 | -0.173706133 | 1.39E-06    | 1.14E-05    |
| TSS200 | SNORD16     | 15 | 66795345                                              | 1 | cg00090787                                                        | 0.54083598  | 0.439707511 | 0.363335564 | -0.177500416 | 3.44E-07    | 3.26E-06    |
| TSS200 | SNX32       | 11 | 65601332/65601267/65601265/6560101/65601385/65601328  | 6 | cg11198128/cg13708218/cg15890274/cg16624692/cg17318632/cg19018097 | 0.079105997 | 0.103562392 | 0.2491938   | 0.170087803  | 0.001369406 | 0.005512933 |
| TSS200 | SORCS1      | 10 | 108924366/108924398                                   | 2 | cg24403845/cg26554592                                             | 0.190141066 | 0.282526276 | 0.41691187  | 0.226770805  | 0.000128659 | 0.000651726 |
| TSS200 | SORCS3      | 10 | 106400686/106400824/106400702/106400667               | 4 | cg03958798/cg08495770/cg10601616/cg20482521                       | 0.309774398 | 0.482957725 | 0.657551995 | 0.347777597  | 1.78E-09    | 3.57E-08    |
| TSS200 | SOST        | 17 | 41836261                                              | 1 | cg01898628                                                        | 0.64740774  | 0.538135711 | 0.451258136 | -0.196149604 | 6.65E-09    | 1.07E-07    |
| TSS200 | SOX14       | 3  | 137483503/137483555/137483506/137483479/137483543     | 5 | cg04374393/cg08073312/cg10343742/cg16428251/cg27505273            | 0.317285466 | 0.352387063 | 0.473015898 | 0.155730432  | 0.000310141 | 0.001435881 |
| TSS200 | SOX15       | 17 | 7493572                                               | 1 | cg12615880                                                        | 0.551596445 | 0.4232491   | 0.343736141 | -0.207860304 | 2.54E-11    | 1.54E-09    |
| TSS200 | SOX17       | 8  | 55370423/55370429/55370434/55370334/55370407/55370336 | 6 | cg04672706/cg11214140/cg15186181/cg15710198/cg24891539/cg24928391 | 0.26956427  | 0.335158679 | 0.467490402 | 0.197926132  | 1.63E-05    | 0.000102144 |
| TSS200 | SOX21       | 13 | 95364514/95364569/95364586/95364510                   | 4 | cg01212887/cg02736420/cg16201674/cg23111830                       | 0.413740165 | 0.420654    | 0.611093993 | 0.197353828  | 4.46E-05    | 0.00025005  |

|        |         |    |                                                                                                    |   |                                                                                                                        |             |             |             |              |             |             |
|--------|---------|----|----------------------------------------------------------------------------------------------------|---|------------------------------------------------------------------------------------------------------------------------|-------------|-------------|-------------|--------------|-------------|-------------|
| TSS200 | SOX5    | 12 | 24715484/2471556<br>4/24715491/247155<br>08/24715478/24102 9<br>830/24715538/2410<br>2807/24102832 |   | cg03625010/cg04389<br>422/cg04925841/cg0<br>6867829/cg08972130<br>/cg15990409/cg1785<br>3504/cg24237081/cg<br>25925006 | 0.153892613 | 0.199314207 | 0.312246283 | 0.15835367   | 0.00201002  | 0.007799213 |
| TSS200 | SOX7    | 8  | 10588040                                                                                           | 1 | cg07233097                                                                                                             | 0.086721234 | 0.122383937 | 0.247570358 | 0.160849124  | 0.005580181 | 0.019394726 |
| TSS200 | SP7     | 12 | 53729629/5372965<br>9                                                                              | 2 | cg07937786/cg22285<br>914                                                                                              | 0.553234633 | 0.492553206 | 0.402101323 | -0.15113331  | 1.33E-06    | 1.10E-05    |
| TSS200 | SPARCL1 | 4  | 88450824                                                                                           | 1 | cg15552249                                                                                                             | 0.490304185 | 0.440458989 | 0.314260523 | -0.176043662 | 1.69E-05    | 0.000105556 |
| TSS200 | SPATA19 | 11 | 133715511                                                                                          | 1 | cg26959392                                                                                                             | 0.657002815 | 0.581037083 | 0.475344023 | -0.181658792 | 8.09E-06    | 5.44E-05    |
| TSS200 | SPATS1  | 6  | 44310324/4431035<br>0/44310345/443103<br>31/44310228/44310<br>257                                  | 6 | cg03400828/cg13077<br>262/cg18959554/cg2<br>2674613/cg22970435<br>/cg26145959                                          | 0.214740013 | 0.256383987 | 0.384852793 | 0.170112779  | 3.08E-05    | 0.000179221 |
| TSS200 | SPDEF   | 6  | 34524290/3452409<br>7/34524278/345240<br>95                                                        | 4 | cg05724257/cg10159<br>596/cg17240454/cg2<br>6578149                                                                    | 0.528432705 | 0.423306575 | 0.353072734 | -0.175359971 | 4.39E-11    | 2.18E-09    |
| TSS200 | SPDYE4  | 17 | 8661887/8661927/8<br>661909/8662011/86<br>62002                                                    | 5 | cg11927584/cg19963<br>471/cg21610999/cg2<br>2664250/cg25245118                                                         | 0.739558195 | 0.680354786 | 0.588808109 | -0.150750086 | 3.09E-12    | 4.37E-10    |
| TSS200 | SPEG    | 2  | 220299584/220299<br>653/220299643/220<br>299604/220299659/<br>220299672                            | 6 | cg07820064/cg12213<br>062/cg15634877/cg1<br>8984724/cg23065715<br>/cg24207529                                          | 0.469303025 | 0.54779978  | 0.627414462 | 0.158111437  | 1.70E-06    | 1.37E-05    |
| TSS200 | SPERT   | 13 | 46276342                                                                                           | 1 | cg05014103                                                                                                             | 0.54399399  | 0.393818894 | 0.3123524   | -0.23164159  | 1.63E-13    | 8.86E-11    |
| TSS200 | SPHKAP  | 2  | 229046406/229046<br>515                                                                            | 2 | cg06092815/cg10959<br>353                                                                                              | 0.426582138 | 0.506556308 | 0.66497103  | 0.238388892  | 1.10E-10    | 4.16E-09    |
| TSS200 | SPINK7  | 5  | 147691898                                                                                          | 1 | cg27488807                                                                                                             | 0.44029912  | 0.340496206 | 0.263366845 | -0.176932275 | 2.98E-10    | 8.72E-09    |
| TSS200 | SPOCK3  | 4  | 168155888/168155<br>853                                                                            | 2 | cg05158197/cg22255<br>664                                                                                              | 0.134234852 | 0.149327418 | 0.311082549 | 0.176847697  | 2.99E-05    | 0.000174442 |
| TSS200 | SPON1   | 11 | 13983893/1398379<br>3/13983784/139838<br>18/13983851/13983<br>790                                  | 6 | cg10153349/cg11028<br>624/cg12085698/cg2<br>2805485/cg24258347<br>/cg25486824                                          | 0.609389123 | 0.536292551 | 0.444381265 | -0.165007858 | 1.06E-09    | 2.35E-08    |
| TSS200 | SPRR2C  | 1  | 153114002/153114<br>115                                                                            | 2 | cg00535683/cg25212<br>571                                                                                              | 0.68623381  | 0.537395661 | 0.421915818 | -0.264317992 | 9.32E-09    | 1.43E-07    |
| TSS200 | SPRR2G  | 1  | 153123593                                                                                          | 1 | cg11267802                                                                                                             | 0.47503494  | 0.346106867 | 0.21350869  | -0.26152625  | 2.69E-13    | 1.21E-10    |
| TSS200 | SPSB4   | 3  | 140770588/140770<br>608/140770617/140<br>770549/140770683/<br>140770599                            | 6 | cg04353095/cg05258<br>261/cg15562912/cg1<br>9443257/cg20979852<br>/cg27515369                                          | 0.144978153 | 0.212109015 | 0.376636693 | 0.23165854   | 0.000113819 | 0.000584061 |

|        |            |    |                                                             |   |                                                                   |             |             |             |              |             |             |
|--------|------------|----|-------------------------------------------------------------|---|-------------------------------------------------------------------|-------------|-------------|-------------|--------------|-------------|-------------|
| TSS200 | SPTBN5     | 15 | 42186377/42186473                                           | 2 | cg04717847/cg10715147                                             | 0.87845406  | 0.728555511 | 0.703730018 | -0.174724042 | 6.17E-06    | 4.28E-05    |
| TSS200 | SRC        | 20 | 35972924/35972957/35973064/35973042                         | 4 | cg13052876/cg18858144/cg19757422/cg24055525                       | 0.612199035 | 0.469545556 | 0.344896282 | -0.267302753 | 3.17E-12    | 4.39E-10    |
| TSS200 | SRD5A2     | 2  | 31806234/31806042/31806183                                  | 3 | cg08894761/cg18529845/cg26638505                                  | 0.497335412 | 0.607666044 | 0.712515223 | 0.215179811  | 1.89E-10    | 6.13E-09    |
| TSS200 | SST        | 3  | 187388281/187388225                                         | 2 | cg07120369/cg13206017                                             | 0.257519023 | 0.362481681 | 0.444945477 | 0.187426455  | 4.60E-06    | 3.29E-05    |
| TSS200 | SSTR2      | 17 | 71161157                                                    | 1 | cg22277994                                                        | 0.282628835 | 0.36149265  | 0.522970159 | 0.240341324  | 3.55E-07    | 3.35E-06    |
| TSS200 | SSTR4      | 20 | 23015932/23015899/23015906/23015908/23015936                | 5 | cg07676859/cg14631053/cg17586860/cg18197392/cg22534145            | 0.491664125 | 0.570694337 | 0.663223045 | 0.17155892   | 2.32E-10    | 7.10E-09    |
| TSS200 | ST6GALNAC1 | 17 | 74639894/74640078/74639928                                  | 3 | cg00440980/cg19829001/cg26550194                                  | 0.409592447 | 0.294223787 | 0.23215168  | -0.177440766 | 4.71E-12    | 5.24E-10    |
| TSS200 | ST6GALNAC5 | 1  | 77332991/77333159/77333138/77332993/77333122/77333074       | 6 | cg09511846/cg13463054/cg13823136/cg15100100/cg16966815/cg27519691 | 0.192329344 | 0.327340075 | 0.47973563  | 0.287406286  | 7.55E-08    | 8.59E-07    |
| TSS200 | ST8SIA3    | 18 | 55019621/55019669/55019708/55019711                         | 4 | cg09036612/cg16902385/cg22070406/cg24811864                       | 0.331821554 | 0.419644847 | 0.527504034 | 0.19568248   | 2.04E-08    | 2.77E-07    |
| TSS200 | ST8SIA4    | 5  | 100239017/100238977/100238983/100239050/100239071/100239022 | 6 | cg01922936/cg03975797/cg04380513/cg12665504/cg16673106/cg26337020 | 0.091095768 | 0.164102127 | 0.294174757 | 0.203078989  | 2.63E-05    | 0.000156345 |
| TSS200 | STAC       | 3  | 36422059/36422093/36422061                                  | 3 | cg04273811/cg24202123/cg26843074                                  | 0.370310257 | 0.450839685 | 0.587633052 | 0.217322795  | 1.43E-08    | 2.04E-07    |
| TSS200 | STAG3      | 7  | 99775422/99775508/99775521/99775443/99775532/99775425       | 6 | cg00048759/cg04778012/cg10084644/cg13210467/cg15140703/cg18691434 | 0.588213756 | 0.663371457 | 0.74003122  | 0.151817464  | 1.07E-09    | 2.37E-08    |
| TSS200 | STATH      | 4  | 70861449                                                    | 1 | cg00436282                                                        | 0.82924721  | 0.755521022 | 0.633677132 | -0.195570078 | 2.30E-05    | 0.000138384 |
| TSS200 | STK32B     | 4  | 5053504/5053341/5053496                                     | 3 | cg08323075/cg10351287/cg23300732                                  | 0.364420718 | 0.451671887 | 0.586809124 | 0.222388406  | 1.57E-07    | 1.63E-06    |
| TSS200 | STK33      | 11 | 8615694/8615685/8615575/8615506/8615579/8615675             | 6 | cg00393798/cg00450824/cg02541031/cg08788717/cg12675870/cg20771178 | 0.066160605 | 0.18140213  | 0.263018018 | 0.196857413  | 0.001309253 | 0.005299183 |
| TSS200 | STMN4      | 8  | 27115956                                                    | 1 | cg11688949                                                        | 0.409378225 | 0.305232394 | 0.230441918 | -0.178936307 | 6.06E-12    | 6.03E-10    |

|        |               |    |                                                             |   |                                                                   |             |             |             |              |             |             |
|--------|---------------|----|-------------------------------------------------------------|---|-------------------------------------------------------------------|-------------|-------------|-------------|--------------|-------------|-------------|
| TSS200 | STON1-GTF2A1L | 2  | 48796151/48795994                                           | 2 | cg06092244/cg14965639                                             | 0.640535798 | 0.529495028 | 0.442253284 | -0.198282513 | 2.16E-07    | 2.14E-06    |
| TSS200 | STOX2         | 4  | 184826314/184826423/184826443/184826421/184826324/184826479 | 6 | cg07089892/cg12843518/cg20026798/cg23649435/cg25669309/cg25882830 | 0.195849138 | 0.203230864 | 0.354199004 | 0.158349866  | 0.003750651 | 0.013650264 |
| TSS200 | STRA6         | 15 | 74495354/74495603/74495657/74501549/74495637/74495384       | 6 | cg00075967/cg13888509/cg18640660/cg21631918/cg22672067/cg26774156 | 0.571048283 | 0.466345474 | 0.368150524 | -0.202897759 | 2.92E-13    | 1.25E-10    |
| TSS200 | STX19         | 3  | 93747528                                                    | 1 | cg19847038                                                        | 0.57732419  | 0.473473    | 0.378321095 | -0.199003095 | 6.44E-11    | 2.84E-09    |
| TSS200 | STX1B         | 16 | 31021933/31021905                                           | 2 | cg02043600/cg03793804                                             | 0.104529743 | 0.202669005 | 0.32675116  | 0.222221418  | 0.000298404 | 0.001386836 |
| TSS200 | SULT4A1       | 22 | 44258572/44258574                                           | 2 | cg15471953/cg21925310                                             | 0.3316428   | 0.379083708 | 0.511421812 | 0.179779012  | 0.000908978 | 0.003801028 |
| TSS200 | SUNC1         | 7  | 48068758/48068728                                           | 2 | cg03609427/cg07298482                                             | 0.699570785 | 0.555518042 | 0.383530455 | -0.31604033  | 3.60E-13    | 1.38E-10    |
| TSS200 | SUSD5         | 3  | 33260743/33260732/33260752                                  | 3 | cg02239862/cg04545136/cg13601427                                  | 0.232784649 | 0.387156452 | 0.541407395 | 0.308622747  | 2.44E-09    | 4.63E-08    |
| TSS200 | SVEP1         | 9  | 113342326                                                   | 1 | cg01503348                                                        | 0.175970525 | 0.200032697 | 0.358150679 | 0.182180154  | 0.001707494 | 0.006744858 |
| TSS200 | SYNPR         | 3  | 63263828/63428587/63263832/63263824/63263752                | 5 | cg04785972/cg05401575/cg06314761/cg09462808/cg22189386            | 0.361922459 | 0.4180359   | 0.54385938  | 0.181936921  | 5.07E-06    | 3.59E-05    |
| TSS200 | SYT14         | 1  | 210111403                                                   | 1 | cg04932544                                                        | 0.187407365 | 0.28068998  | 0.374528645 | 0.187121281  | 2.37E-07    | 2.34E-06    |
| TSS200 | SYT6          | 1  | 114696671/114696641                                         | 2 | cg01567634/cg21920775                                             | 0.229697972 | 0.279092855 | 0.456830873 | 0.227132901  | 3.10E-07    | 2.97E-06    |
| TSS200 | SYT8          | 11 | 1855606/1855561/1855502/1855660/1855665                     | 5 | cg022294791/cg09575189/cg16657886/cg21544658/cg24331162           | 0.570932575 | 0.459229006 | 0.382027417 | -0.188905158 | 2.12E-11    | 1.38E-09    |
| TSS200 | SYT9          | 11 | 7273154/7273049/7273046/7273148                             | 4 | cg02269161/cg03226737/cg16437728/cg18560328                       | 0.265101867 | 0.336651784 | 0.4938824   | 0.228780533  | 0.000112325 | 0.000577331 |
| TSS200 | SYTL3         | 6  | 159070959/15907994/159071008                                | 3 | cg02829601/cg04205041/cg07265541                                  | 0.399519952 | 0.262627531 | 0.218657572 | -0.18086238  | 2.66E-07    | 2.59E-06    |
| TSS200 | T             | 6  | 166582159/166582188/166582310/166582201/166582197/166582206 | 6 | cg02149708/cg05655837/cg06073449/cg14638883/cg17188046/cg19675288 | 0.180627035 | 0.24209568  | 0.342000668 | 0.161373633  | 0.013206939 | 0.041593812 |
| TSS200 | T-SP1         | 8  | 10383071                                                    | 1 | cg00014260                                                        | 0.5466238   | 0.424706289 | 0.296280595 | -0.250343205 | 3.17E-12    | 4.39E-10    |

|        |          |    |                                                                   |   |                                                                               |             |             |             |              |          |             |
|--------|----------|----|-------------------------------------------------------------------|---|-------------------------------------------------------------------------------|-------------|-------------|-------------|--------------|----------|-------------|
| TSS200 | TAC1     | 7  | 97361241/9736114<br>8/97361201/973611<br>14/97361244/97361<br>252 | 6 | cg01287975/cg02539<br>083/cg07550362/cg0<br>9236284/cg11873482<br>/cg17437939 | 0.312087028 | 0.366139039 | 0.500784109 | 0.188697082  | 2.83E-05 | 0.000166307 |
| TSS200 | TACR3    | 4  | 104641146/104641<br>033/104641124/104<br>641072                   | 4 | cg00875511/cg04535<br>008/cg19163049/cg2<br>4090629                           | 0.330819935 | 0.381400272 | 0.516370473 | 0.185550538  | 3.94E-06 | 2.86E-05    |
| TSS200 | TAS1R2   | 1  | 19186245/1918626<br>0                                             | 2 | cg07947459/cg20678<br>988                                                     | 0.757506495 | 0.608475239 | 0.437779341 | -0.319727154 | 7.48E-13 | 1.97E-10    |
| TSS200 | TAS2R40  | 7  | 142919080/142919<br>141                                           | 2 | cg02341670/cg22691<br>319                                                     | 0.77244144  | 0.626515364 | 0.49837982  | -0.27406162  | 1.60E-11 | 1.17E-09    |
| TSS200 | TBC1D3C  | 17 | 34808203/3459207<br>5                                             | 2 | cg16780784/cg23350<br>580                                                     | 0.57225207  | 0.476445956 | 0.411471289 | -0.160780781 | 2.05E-13 | 9.79E-11    |
| TSS200 | TBC1D3G  | 17 | 34808203                                                          | 1 | cg16780784                                                                    | 0.58803006  | 0.473529456 | 0.396497141 | -0.191532919 | 3.81E-12 | 4.74E-10    |
| TSS200 | TBX15    | 1  | 119532189/119532<br>352/119532195/119<br>532320                   | 4 | cg05940231/cg12664<br>119/cg25340966/cg2<br>6272623                           | 0.366163911 | 0.455126192 | 0.618629788 | 0.252465876  | 2.27E-10 | 7.00E-09    |
| TSS200 | TBX18    | 6  | 85474093/8547402<br>8/85474090/854740<br>87                       | 4 | cg02106850/cg04515<br>996/cg07028914/cg1<br>4068328                           | 0.38047449  | 0.474290124 | 0.573827582 | 0.193353092  | 1.03E-06 | 8.77E-06    |
| TSS200 | TCL1A    | 14 | 96180653/9618064<br>8/96180576/961806<br>43/96180598              | 5 | cg07445246/cg13282<br>837/cg19992633/cg2<br>4996565/cg27089768                | 0.409429202 | 0.510696565 | 0.602653592 | 0.19322439   | 1.35E-08 | 1.96E-07    |
| TSS200 | TCL6     | 14 | 96117415                                                          | 1 | cg07734106                                                                    | 0.572103825 | 0.465468094 | 0.400013436 | -0.172090389 | 4.39E-08 | 5.37E-07    |
| TSS200 | TCN1     | 11 | 59634218/5963419<br>1                                             | 2 | cg00187686/cg23741<br>006                                                     | 0.476723923 | 0.324451908 | 0.230647861 | -0.246076061 | 4.37E-11 | 2.18E-09    |
| TSS200 | TCP10L   | 21 | 33957957/3395784<br>6                                             | 2 | cg08949101/cg15713<br>719                                                     | 0.669835563 | 0.550494103 | 0.381136684 | -0.288698878 | 4.64E-13 | 1.66E-10    |
| TSS200 | TCTEX1D1 | 1  | 67218090/6721808<br>0/67217950/672181<br>35/67217984              | 5 | cg09318375/cg11824<br>639/cg16996144/cg1<br>7284804/cg19808205                | 0.224831671 | 0.295018495 | 0.415352769 | 0.190521098  | 4.36E-06 | 3.14E-05    |
| TSS200 | TDRG1    | 6  | 40346035/4034611<br>4/40346044                                    | 3 | cg02995731/cg08415<br>973/cg26748297                                          | 0.47634473  | 0.371496411 | 0.312484768 | -0.163859962 | 1.62E-10 | 5.45E-09    |
| TSS200 | TEKT1    | 17 | 6735063/6735195/6<br>735065/6735152/67<br>35146/6735116           | 6 | cg00414171/cg01990<br>878/cg05094548/cg0<br>7989568/cg15727185<br>/cg20354430 | 0.158426185 | 0.217603589 | 0.342974001 | 0.184547816  | 3.20E-06 | 2.39E-05    |
| TSS200 | TFEB     | 6  | 41704003                                                          | 1 | cg09490007                                                                    | 0.646303465 | 0.543771017 | 0.487805014 | -0.158498451 | 2.13E-06 | 1.68E-05    |
| TSS200 | TFF3     | 21 | 43735844                                                          | 1 | cg21970261                                                                    | 0.50459979  | 0.394474317 | 0.304437227 | -0.200162563 | 9.42E-11 | 3.71E-09    |



|        |        |    |                                                                                       |   |                                                                                              |             |             |             |              |             |             |
|--------|--------|----|---------------------------------------------------------------------------------------|---|----------------------------------------------------------------------------------------------|-------------|-------------|-------------|--------------|-------------|-------------|
| TSS200 | TFPI2  | 7  | 93520183/9352007<br>4/93520175/935201<br>72                                           | 4 | cg14377593/cg16934<br>178/cg22441533/cg2<br>6739865                                          | 0.108107687 | 0.218527103 | 0.371475189 | 0.263367502  | 2.62E-06    | 2.01E-05    |
| TSS200 | TG     | 8  | 133879048/133879<br>162                                                               | 2 | cg14340089/cg18235<br>635                                                                    | 0.616033933 | 0.538055742 | 0.43028305  | -0.185750883 | 2.34E-09    | 4.48E-08    |
| TSS200 | TGM3   | 20 | 2276435/2276526/2<br>276571/2276503                                                   | 4 | cg09561663/cg11195<br>933/cg12761282/cg2<br>4138234                                          | 0.667619143 | 0.589707739 | 0.509047856 | -0.158571287 | 8.56E-09    | 1.33E-07    |
| TSS200 | TGM4   | 3  | 44915918/4491598<br>5/44916012                                                        | 3 | cg09111917/cg18293<br>158/cg21616161                                                         | 0.712523233 | 0.590160375 | 0.460092709 | -0.252430523 | 1.19E-10    | 4.38E-09    |
| TSS200 | TGM5   | 15 | 43559170                                                                              | 1 | cg27496506                                                                                   | 0.60236013  | 0.494114083 | 0.40193165  | -0.20042848  | 3.78E-10    | 1.05E-08    |
| TSS200 | THBD   | 20 | 23030434/2303044<br>6/23030343/230304<br>42                                           | 4 | cg09083579/cg22152<br>407/cg24136114/cg2<br>5397597                                          | 0.195704543 | 0.208160946 | 0.360467495 | 0.164762953  | 0.001810921 | 0.007094762 |
| TSS200 | THBS4  | 5  | 79330929/7933079<br>9/79330943/793309<br>59                                           | 4 | cg00795341/cg05527<br>185/cg10784386/cg1<br>8110483                                          | 0.368587944 | 0.455905008 | 0.571257951 | 0.202670007  | 3.46E-05    | 0.000198859 |
| TSS200 | THEM5  | 1  | 151826205                                                                             | 1 | cg26292918                                                                                   | 0.46167944  | 0.378515772 | 0.298265282 | -0.163414158 | 5.58E-12    | 5.68E-10    |
| TSS200 | THSD7B | 2  | 137748455/137748<br>366/137748460/137<br>748382                                       | 4 | cg06848148/cg07412<br>043/cg08231096/cg1<br>5750500                                          | 0.750765971 | 0.672058824 | 0.557499951 | -0.19326602  | 1.55E-08    | 2.19E-07    |
| TSS200 | TK2    | 16 | 66584358                                                                              | 1 | cg09238666                                                                                   | 0.4455406   | 0.328500167 | 0.29134115  | -0.15419945  | 7.58E-09    | 1.20E-07    |
| TSS200 | TKTL2  | 4  | 164395093/164395<br>149                                                               | 2 | cg12267786/cg16413<br>535                                                                    | 0.70964706  | 0.626301142 | 0.550838093 | -0.158808967 | 4.33E-08    | 5.30E-07    |
| TSS200 | TLX1   | 10 | 102891045/102890<br>984/102890974/102<br>890886/102890986/<br>102891019               | 6 | cg02567119/cg03020<br>810/cg08908184/cg1<br>1196237/cg18964775<br>/cg25741023                | 0.180028495 | 0.168964721 | 0.331625611 | 0.151597116  | 0.001485164 | 0.005939526 |
| TSS200 | TLX1NB | 10 | 102891076/102891<br>045/102890984/102<br>890974/102890986/<br>102891019/102891<br>080 | 7 | cg02096397/cg02567<br>119/cg03020810/cg0<br>8908184/cg18964775<br>/cg25741023/cg2727<br>2677 | 0.17461684  | 0.155415108 | 0.326264762 | 0.151647922  | 0.00194113  | 0.007559812 |
| TSS200 | TLX3   | 5  | 170736180/170736<br>132/170736201/170<br>736251/170736245/<br>170736277               | 6 | cg02676375/cg05190<br>315/cg17833476/cg2<br>5942450/cg26517714<br>/cg26844246                | 0.376615909 | 0.390529986 | 0.531840525 | 0.155224617  | 0.000209849 | 0.001012581 |
| TSS200 | TM4SF4 | 3  | 149192304/149192<br>377                                                               | 2 | cg13235059/cg13688<br>966                                                                    | 0.3812444   | 0.288978125 | 0.227290243 | -0.153954157 | 1.03E-10    | 3.98E-09    |
| TSS200 | TM6SF1 | 15 | 83776271/8377626<br>9                                                                 | 2 | cg08452658/cg11167<br>100                                                                    | 0.151241291 | 0.376860035 | 0.565246468 | 0.414005177  | 6.07E-14    | 5.04E-11    |
| TSS200 | TMCO2  | 1  | 40713471                                                                              | 1 | cg18124737                                                                                   | 0.543647395 | 0.428685711 | 0.343484505 | -0.20016289  | 8.79E-10    | 2.03E-08    |

|        |          |    |                                                             |   |                                                                   |             |             |             |              |             |             |
|--------|----------|----|-------------------------------------------------------------|---|-------------------------------------------------------------------|-------------|-------------|-------------|--------------|-------------|-------------|
| TSS200 | TMCO5A   | 15 | 38227285                                                    | 1 | cg03998348                                                        | 0.67664391  | 0.564434928 | 0.434818514 | -0.241825396 | 1.90E-07    | 1.92E-06    |
| TSS200 | TMED6    | 16 | 69385761/69385827                                           | 2 | cg08627125/cg18368125                                             | 0.57885771  | 0.468375772 | 0.382623114 | -0.196234596 | 3.09E-11    | 1.72E-09    |
| TSS200 | TMEFF2   | 2  | 193059717/193059645                                         | 2 | cg01808545/cg06008912                                             | 0.226116285 | 0.341391714 | 0.472140502 | 0.246024217  | 3.76E-06    | 2.74E-05    |
| TSS200 | TMEM105  | 17 | 79304594/79304600/79304498/79304628/79304613/79304649       | 6 | cg03841376/cg09695261/cg11758345/cg21591452/cg21735384/cg25555068 | 0.642696368 | 0.572918681 | 0.481116411 | -0.161579957 | 7.08E-09    | 1.14E-07    |
| TSS200 | TMEM108  | 3  | 132757106/132756991/132757087/132756986/132757090/132757102 | 6 | cg02745211/cg05075118/cg06288251/cg17385936/cg18115215/cg24198558 | 0.335006086 | 0.438743076 | 0.612661876 | 0.27765579   | 4.49E-10    | 1.20E-08    |
| TSS200 | TMEM132D | 12 | 130388216/130388234                                         | 2 | cg12122146/cg23891360                                             | 0.432046123 | 0.547361186 | 0.713278861 | 0.281232739  | 1.24E-12    | 2.41E-10    |
| TSS200 | TMEM132E | 17 | 32907639/32907705/32907636/32907731                         | 4 | cg03442425/cg10451253/cg21745612/cg27213352                       | 0.330240289 | 0.433951689 | 0.587126273 | 0.256885984  | 2.61E-07    | 2.55E-06    |
| TSS200 | TMEM155  | 4  | 122686432/122686453/122686493/122686456                     | 4 | cg03227184/cg04638468/cg07978472/cg08553437                       | 0.299777159 | 0.451787739 | 0.640223931 | 0.340446772  | 2.61E-11    | 1.54E-09    |
| TSS200 | TMEM163  | 2  | 135476601/135476701/135476679                               | 3 | cg03556069/cg19589919/cg23057992                                  | 0.068451525 | 0.086850362 | 0.236914525 | 0.168463     | 0.000363374 | 0.001657518 |
| TSS200 | TMEM184A | 7  | 1596260/1596217/1596103/1596118/1596136                     | 5 | cg00335591/cg06194808/cg09990600/cg12503394/cg21368161            | 0.309717886 | 0.21227702  | 0.158921911 | -0.150795975 | 2.38E-11    | 1.49E-09    |
| TSS200 | TMEM196  | 7  | 19812479/19812570/19812578/19812548/19812592                | 5 | cg11876022/cg18505401/cg21657955/cg23181844/cg27341472            | 0.227853645 | 0.284924911 | 0.43160987  | 0.203756225  | 4.65E-06    | 3.32E-05    |
| TSS200 | TMEM215  | 9  | 32783463                                                    | 1 | cg14614901                                                        | 0.312512325 | 0.411833711 | 0.542524859 | 0.230012534  | 8.00E-09    | 1.26E-07    |
| TSS200 | TMEM26   | 10 | 63213391/63213385/63213396/63213339                         | 4 | cg00360414/cg06067842/cg12160258/cg18286501                       | 0.281732012 | 0.289902709 | 0.452608389 | 0.170876378  | 0.000120966 | 0.000616919 |
| TSS200 | TMEM40   | 3  | 12800836/12800816                                           | 2 | cg07908984/cg19384379                                             | 0.648811635 | 0.546956033 | 0.456400284 | -0.192411351 | 3.01E-12    | 4.35E-10    |
| TSS200 | TMEM90A  | 14 | 74892986                                                    | 1 | cg06204735                                                        | 0.359359645 | 0.4851486   | 0.670560677 | 0.311201032  | 4.78E-08    | 5.79E-07    |
| TSS200 | TMEM90B  | 20 | 24449734/24449668/24449760/24449704/24449804                | 5 | cg02997755/cg05347927/cg22452236/cg22479299/cg25300584            | 0.265945449 | 0.362779114 | 0.456381273 | 0.190435824  | 3.20E-07    | 3.06E-06    |
| TSS200 | TMIGD1   | 17 | 28661120                                                    | 1 | cg22547480                                                        | 0.586335145 | 0.474878183 | 0.353830964 | -0.232504181 | 9.03E-11    | 3.61E-09    |

|        |           |    |                                                      |   |                                                                |             |             |             |              |             |             |
|--------|-----------|----|------------------------------------------------------|---|----------------------------------------------------------------|-------------|-------------|-------------|--------------|-------------|-------------|
| TSS200 | TMPRSS11B | 4  | 69111580                                             | 1 | cg19510180                                                     | 0.714751535 | 0.542103178 | 0.4340898   | -0.280661735 | 5.39E-12    | 5.62E-10    |
| TSS200 | TMPRSS11F | 4  | 68995759                                             | 1 | cg20695587                                                     | 0.56302791  | 0.444433178 | 0.349888768 | -0.213139142 | 3.25E-12    | 4.45E-10    |
| TSS200 | TMPRSS4   | 11 | 117947611/117947<br>555/117947657/117<br>947628      | 4 | cg03634928/cg05775<br>918/cg25116503/cg2<br>7300950            | 0.47516815  | 0.390537706 | 0.311708605 | -0.163459545 | 1.21E-10    | 4.41E-09    |
| TSS200 | TMPRSS5   | 11 | 113577071/113577<br>118/113577120                    | 3 | cg15844374/cg18165<br>914/cg25460340                           | 0.781289865 | 0.614981269 | 0.563340545 | -0.21794932  | 1.08E-09    | 2.37E-08    |
| TSS200 | TMPRSS6   | 22 | 37499741/3749985<br>9                                | 2 | cg05754122/cg16971<br>128                                      | 0.547677188 | 0.451717842 | 0.383273891 | -0.164403297 | 1.47E-06    | 1.20E-05    |
| TSS200 | TMPRSS8   | 16 | 2892766/2892769/2<br>892912/2892809/28<br>92782      | 5 | cg01006802/cg03625<br>141/cg10186456/cg1<br>0448227/cg27137258 | 0.511066378 | 0.571128017 | 0.66412063  | 0.153054252  | 6.37E-08    | 7.45E-07    |
| TSS200 | TNFRSF25  | 1  | 6526319/6526325/6<br>526309/6526398                  | 4 | cg02064442/cg03893<br>150/cg10539898/cg2<br>3114616            | 0.470808438 | 0.574527461 | 0.638723134 | 0.167914697  | 6.99E-06    | 4.78E-05    |
| TSS200 | TNFRSF8   | 1  | 12123313/1212333<br>9/12123308/121232<br>62/12185845 | 5 | cg00653960/cg01966<br>612/cg14834850/cg1<br>9896198/cg22123711 | 0.268694715 | 0.332373553 | 0.452692939 | 0.183998225  | 4.83E-06    | 3.43E-05    |
| TSS200 | TNIP3     | 4  | 122137696                                            | 1 | cg05559643                                                     | 0.771613395 | 0.681577756 | 0.545177509 | -0.226435886 | 1.21E-06    | 1.01E-05    |
| TSS200 | TNNT2     | 1  | 201346876                                            | 1 | cg19233001                                                     | 0.55244492  | 0.455045644 | 0.399744355 | -0.152700565 | 1.51E-06    | 1.23E-05    |
| TSS200 | TNP1      | 2  | 217724794/217724<br>937/217724866                    | 3 | cg19384546/cg21808<br>287/cg24545125                           | 0.580238463 | 0.456472925 | 0.353513675 | -0.226724788 | 2.49E-12    | 3.89E-10    |
| TSS200 | TNS4      | 17 | 38657949/3865791<br>5/38657934/386578<br>75          | 4 | cg08074477/cg09303<br>236/cg20468081/cg2<br>5936381            | 0.498679745 | 0.402321397 | 0.322580061 | -0.176099684 | 4.35E-11    | 2.18E-09    |
| TSS200 | TP63      | 3  | 189349129/189507<br>396/189349021                    | 3 | cg04489243/cg06520<br>450/cg06720722                           | 0.719073787 | 0.641785876 | 0.566298702 | -0.152775085 | 5.29E-06    | 3.72E-05    |
| TSS200 | TREH      | 11 | 118550485/118550<br>461/118550443                    | 3 | cg09144398/cg15474<br>711/cg21424090                           | 0.506665405 | 0.425926917 | 0.356635091 | -0.150030314 | 6.35E-11    | 2.83E-09    |
| TSS200 | TREML3    | 6  | 41185715                                             | 1 | cg05143424                                                     | 0.806213305 | 0.763482017 | 0.578187677 | -0.228025628 | 5.08E-06    | 3.59E-05    |
| TSS200 | TRIM17    | 1  | 228604595                                            | 1 | cg18875460                                                     | 0.109818668 | 0.174334918 | 0.276380892 | 0.166562224  | 0.001847863 | 0.007221549 |
| TSS200 | TRIM53    | 11 | 89735737                                             | 1 | cg13218423                                                     | 0.39197496  | 0.291447678 | 0.211083082 | -0.180891878 | 6.62E-12    | 6.35E-10    |
| TSS200 | TRIM67    | 1  | 231298610/231298<br>651                              | 2 | cg21178978/cg27504<br>802                                      | 0.36290941  | 0.421774669 | 0.531577916 | 0.168668506  | 0.000184633 | 0.000901107 |
| TSS200 | TRIM71    | 3  | 32859445/3285940<br>7/32859377/328594<br>17/32859438 | 5 | cg17029062/cg19127<br>283/cg21124497/cg2<br>1484228/cg23528400 | 0.177171096 | 0.312241233 | 0.489104515 | 0.311933419  | 4.30E-08    | 5.27E-07    |

|        |         |    |                                                                         |   |                                                                               |             |             |             |              |             |             |
|--------|---------|----|-------------------------------------------------------------------------|---|-------------------------------------------------------------------------------|-------------|-------------|-------------|--------------|-------------|-------------|
| TSS200 | TRIM72  | 16 | 31225234                                                                | 1 | cg24918715                                                                    | 0.827228695 | 0.730094806 | 0.598446886 | -0.228781809 | 3.99E-07    | 3.72E-06    |
| TSS200 | TRIM9   | 14 | 51562550/5156252<br>6/51562486/515625<br>91                             | 4 | cg04234680/cg05021<br>896/cg15353061/cg2<br>5077778                           | 0.179649223 | 0.258085222 | 0.342889668 | 0.163240445  | 0.000118414 | 0.000605075 |
| TSS200 | TRMT12  | 8  | 125462982/125463<br>024/125463007                                       | 3 | cg09825146/cg11829<br>072/cg26141173                                          | 0.025965686 | 0.044628105 | 0.184920773 | 0.158955087  | 0.003930133 | 0.01423387  |
| TSS200 | TRPC4   | 13 | 38444087/3844405<br>2/38444134/384439<br>50/38444012                    | 5 | cg01764020/cg13549<br>719/cg15696906/cg1<br>9275632/cg20535787                | 0.235588367 | 0.307854211 | 0.42716698  | 0.191578613  | 1.47E-05    | 9.29E-05    |
| TSS200 | TRPC6   | 11 | 101454733/101454<br>683/101454765/101<br>454823/101454676/<br>101454680 | 6 | cg04553838/cg07013<br>734/cg14186937/cg2<br>3644960/cg23650423<br>/cg27296293 | 0.334916158 | 0.415615892 | 0.60046499  | 0.265548833  | 2.96E-09    | 5.48E-08    |
| TSS200 | TRPC7   | 5  | 135701240/135701<br>184                                                 | 2 | cg22770135/cg23409<br>403                                                     | 0.408309693 | 0.504725928 | 0.661992732 | 0.253683039  | 3.50E-11    | 1.88E-09    |
| TSS200 | TRPM5   | 11 | 2444462                                                                 | 1 | cg24894353                                                                    | 0.522255405 | 0.436107117 | 0.36481245  | -0.157442955 | 1.48E-09    | 3.05E-08    |
| TSS200 | TRPM8   | 2  | 234825859                                                               | 1 | cg23688111                                                                    | 0.34673836  | 0.280116867 | 0.190185001 | -0.156553359 | 1.05E-09    | 2.34E-08    |
| TSS200 | TSPAN11 | 12 | 31079694                                                                | 1 | cg21701379                                                                    | 0.280128765 | 0.375699956 | 0.461281841 | 0.181153076  | 1.91E-05    | 0.00011744  |
| TSS200 | TSPAN8  | 12 | 71551926                                                                | 1 | cg02965411                                                                    | 0.4956817   | 0.3893717   | 0.312714341 | -0.182967359 | 5.86E-13    | 1.78E-10    |
| TSS200 | TSPYL5  | 8  | 98290372/9829035<br>9/98290229/982903<br>61/98290310                    | 5 | cg00032205/cg00249<br>621/cg04917181/cg0<br>8858210/cg22319311                | 0.479892745 | 0.560587386 | 0.65569305  | 0.175800305  | 4.35E-10    | 1.17E-08    |
| TSS200 | TTBK1   | 6  | 43211213/4321120<br>8                                                   | 2 | cg16620382/cg27363<br>327                                                     | 0.211685645 | 0.279681931 | 0.453220344 | 0.241534699  | 0.000598988 | 0.002595613 |
| TSS200 | TTYH1   | 19 | 54926514/5492661<br>7/54926437                                          | 3 | cg15241920/cg15723<br>536/cg21883754                                          | 0.192593199 | 0.35211354  | 0.553464397 | 0.360871198  | 1.62E-07    | 1.67E-06    |
| TSS200 | TUSC3   | 8  | 15397637                                                                | 1 | cg16243756                                                                    | 0.34866517  | 0.475554461 | 0.627883064 | 0.279217894  | 1.30E-08    | 1.89E-07    |
| TSS200 | TWIST1  | 7  | 19157296/1915730<br>4/19157420/191573<br>439                            | 4 | cg00240432/cg09799<br>658/cg10420952/cg1<br>2926104                           | 0.124634029 | 0.213812571 | 0.414031915 | 0.289397886  | 5.84E-07    | 5.24E-06    |
| TSS200 | TYRP1   | 9  | 12693326                                                                | 1 | cg25989745                                                                    | 0.604146725 | 0.508024117 | 0.384553745 | -0.21959298  | 5.84E-07    | 5.24E-06    |
| TSS200 | UBD     | 6  | 29527870/2952788<br>5                                                   | 2 | cg05087623/cg05157<br>433                                                     | 0.62102572  | 0.5307049   | 0.44991987  | -0.17110585  | 5.68E-07    | 5.10E-06    |
| TSS200 | UBQLN3  | 11 | 5531235/5531199/5<br>531283                                             | 3 | cg13372231/cg15541<br>062/cg24229750                                          | 0.667960305 | 0.574863861 | 0.44839652  | -0.219563785 | 3.03E-08    | 3.89E-07    |
| TSS200 | UBQLNL  | 11 | 5538030                                                                 | 1 | cg09232851                                                                    | 0.76521776  | 0.69953415  | 0.536760745 | -0.228457015 | 3.58E-06    | 2.64E-05    |
| TSS200 | UCHL1   | 4  | 41258790/4125879<br>4                                                   | 2 | cg04178266/cg24715<br>245                                                     | 0.355670548 | 0.443175861 | 0.5294623   | 0.173791753  | 0.000307202 | 0.001423527 |
| TSS200 | UGT1A10 | 2  | 234544995/234545<br>110                                                 | 2 | cg19975800/cg26238<br>727                                                     | 0.517837795 | 0.412424044 | 0.324400152 | -0.193437643 | 7.47E-11    | 3.19E-09    |

|        |         |    |                                                                   |   |                                                                               |             |             |             |              |             |             |
|--------|---------|----|-------------------------------------------------------------------|---|-------------------------------------------------------------------------------|-------------|-------------|-------------|--------------|-------------|-------------|
| TSS200 | UNC13A  | 19 | 17799037                                                          | 1 | cg12075720                                                                    | 0.2873246   | 0.340007889 | 0.476782937 | 0.189458337  | 0.000309318 | 0.001432494 |
| TSS200 | UNC5C   | 4  | 96470237/9647028<br>6/96470349/964702<br>93/96470250              | 5 | cg07234102/cg11723<br>848/cg15984718/cg1<br>7334018/cg22634891                | 0.26381941  | 0.359211378 | 0.47920597  | 0.21538656   | 2.95E-07    | 2.84E-06    |
| TSS200 | UNC5D   | 8  | 35092876/3509282<br>3/35092870                                    | 3 | cg06010588/cg08000<br>065/cg26872137                                          | 0.431068495 | 0.468972635 | 0.612479635 | 0.18141114   | 1.09E-07    | 1.18E-06    |
| TSS200 | UNC80   | 2  | 210636560/210636<br>533/210636539                                 | 3 | cg04100532/cg09438<br>147/cg24938830                                          | 0.38753957  | 0.459278506 | 0.628306471 | 0.240766901  | 3.65E-06    | 2.68E-05    |
| TSS200 | UNCX    | 7  | 1272545/1272512/1<br>272559/1272515/12<br>72526/1272486           | 6 | cg05157140/cg08507<br>422/cg17294725/cg2<br>0870512/cg21158633<br>/cg21543987 | 0.340667745 | 0.361306234 | 0.521764314 | 0.181096569  | 2.33E-05    | 0.000140333 |
| TSS200 | USH2A   | 1  | 216596808                                                         | 1 | cg27566805                                                                    | 0.51911659  | 0.426679828 | 0.321774473 | -0.197342117 | 4.82E-12    | 5.24E-10    |
| TSS200 | USP17L2 | 8  | 11996358/1199632<br>7                                             | 2 | cg01055129/cg04900<br>893                                                     | 0.67856897  | 0.547141683 | 0.462403295 | -0.216165675 | 2.76E-11    | 1.59E-09    |
| TSS200 | USP6    | 17 | 5031675                                                           | 1 | cg23416909                                                                    | 0.651823145 | 0.6215993   | 0.490925905 | -0.16089724  | 3.23E-05    | 0.000186821 |
| TSS200 | UTF1    | 10 | 135043586                                                         | 1 | cg11234328                                                                    | 0.42125665  | 0.533051528 | 0.667157064 | 0.245900414  | 1.41E-12    | 2.62E-10    |
| TSS200 | VAMP5   | 2  | 85811471/8581142<br>1/85811432                                    | 3 | cg11108890/cg16719<br>560/cg19513321                                          | 0.385464956 | 0.505288313 | 0.57924543  | 0.193780475  | 5.92E-05    | 0.00032249  |
| TSS200 | VAT1L   | 16 | 77822438/7782235<br>0/77822299/778224<br>33/77822419/77822<br>441 | 6 | cg00497967/cg02214<br>096/cg03074283/cg0<br>4658772/cg07821427<br>/cg07857243 | 0.083508518 | 0.175044789 | 0.306165967 | 0.222657449  | 0.000609431 | 0.002637967 |
| TSS200 | VAV3    | 1  | 108231160                                                         | 1 | cg07243548                                                                    | 0.462081    | 0.338020622 | 0.255977832 | -0.206103168 | 4.30E-12    | 5.02E-10    |
| TSS200 | VCAN    | 5  | 82767394/8276729<br>7/82767450                                    | 3 | cg02551029/cg19540<br>689/cg21810188                                          | 0.130012098 | 0.174571956 | 0.370658713 | 0.240646615  | 2.87E-05    | 0.000168594 |
| TSS200 | VIL1    | 2  | 219283823                                                         | 1 | cg18970338                                                                    | 0.41553916  | 0.332385483 | 0.258843809 | -0.156695351 | 1.34E-09    | 2.82E-08    |
| TSS200 | VNN1    | 6  | 133035235/133035<br>379/133035266                                 | 3 | cg02184413/cg24964<br>103/cg25654653                                          | 0.38331087  | 0.279078594 | 0.22145863  | -0.16185224  | 1.85E-12    | 3.07E-10    |
| TSS200 | VPREB1  | 22 | 22599128/2259918<br>9                                             | 2 | cg03763796/cg25330<br>366                                                     | 0.371563065 | 0.215505522 | 0.142456698 | -0.229106367 | 6.70E-10    | 1.64E-08    |
| TSS200 | VSIG10L | 19 | 51845446                                                          | 1 | cg07056626                                                                    | 0.442133385 | 0.33737305  | 0.2721618   | -0.169971585 | 8.13E-11    | 3.36E-09    |
| TSS200 | VSTM2A  | 7  | 54609953/5460983<br>6/54609968/546098<br>19                       | 4 | cg03817667/cg08532<br>834/cg22131234/cg2<br>5022866                           | 0.378145683 | 0.450642006 | 0.543144761 | 0.164999077  | 6.49E-05    | 0.000349025 |
| TSS200 | VSX1    | 20 | 25062827/2506277<br>1/25062777/250628<br>60/25062823/25062<br>819 | 6 | cg01715455/cg01941<br>895/cg02631468/cg0<br>3111498/cg15272362<br>/cg16185834 | 0.327231481 | 0.389951827 | 0.576211427 | 0.248979946  | 6.69E-10    | 1.64E-08    |

|        |         |    |                                                                           |                                                                               |             |             |             |              |             |             |
|--------|---------|----|---------------------------------------------------------------------------|-------------------------------------------------------------------------------|-------------|-------------|-------------|--------------|-------------|-------------|
| TSS200 | VSX2    | 14 | 74706113/7470603<br>1/74706016/747060 5<br>62/74706074                    | cg09816693/cg12827<br>555/cg15416329/cg2<br>1057587/cg23118730                | 0.330851714 | 0.373553735 | 0.534947252 | 0.204095539  | 7.32E-08    | 8.38E-07    |
| TSS200 | VTCN1   | 1  | 117753741/117753<br>602/117753591/117 4<br>753616                         | cg04718492/cg15597<br>855/cg16408593/cg2<br>4006253                           | 0.47737598  | 0.381396872 | 0.303938705 | -0.173437275 | 5.35E-11    | 2.53E-09    |
| TSS200 | VWC2    | 7  | 49813088/4981310<br>2/49813111/498130 4<br>65                             | cg01893212/cg02467<br>990/cg09493505/cg1<br>4045872                           | 0.186555477 | 0.208329984 | 0.45091293  | 0.264357453  | 0.000294349 | 0.001370413 |
| TSS200 | WBSCR17 | 7  | 70597774/7059777<br>8/70597713/705976 5<br>87/70597599                    | cg02172150/cg08251<br>037/cg16005494/cg2<br>1135135/cg23839136                | 0.453998509 | 0.535313332 | 0.673429656 | 0.219431147  | 2.75E-11    | 1.59E-09    |
| TSS200 | WBSCR26 | 7  | 73149356                                                                  | cg17240725                                                                    | 0.345454875 | 0.253107767 | 0.190880347 | -0.154574528 | 9.70E-11    | 3.82E-09    |
| TSS200 | WDR17   | 4  | 176986922/176986<br>856/176986950/176 5<br>986787/176986845               | cg07760910/cg16974<br>909/cg18443378/cg2<br>2520644/cg24141863                | 0.100029361 | 0.214771414 | 0.303190996 | 0.203161634  | 8.39E-06    | 5.63E-05    |
| TSS200 | WDR86   | 7  | 151107285/151107<br>257/151107261                                         | cg10770742/cg17362<br>861/cg24068372                                          | 0.258717153 | 0.351823141 | 0.541493242 | 0.28277609   | 6.20E-07    | 5.52E-06    |
| TSS200 | WFDC13  | 20 | 44330621                                                                  | cg17890298                                                                    | 0.655958435 | 0.513161717 | 0.424119641 | -0.231838794 | 3.26E-13    | 1.34E-10    |
| TSS200 | WIF1    | 12 | 65515290/6551527<br>6                                                     | cg24166864/cg26397<br>188                                                     | 0.41899307  | 0.498607872 | 0.575173375 | 0.156180305  | 0.000281361 | 0.00131577  |
| TSS200 | WIPF3   | 7  | 29874333                                                                  | cg27182527                                                                    | 0.68072004  | 0.651343228 | 0.514045509 | -0.166674531 | 1.62E-05    | 0.00010147  |
| TSS200 | WISP3   | 6  | 112375302/112375<br>333/112375200/112 6<br>375186/112375324/<br>112375206 | cg07709205/cg10525<br>372/cg17694848/cg1<br>9804071/cg21773633<br>/cg26528298 | 0.544106227 | 0.454339027 | 0.370440439 | -0.173665788 | 2.61E-11    | 1.54E-09    |
| TSS200 | WNT2    | 7  | 116963492/116963<br>502/116963500                                         | cg01830294/cg06987<br>468/cg17339147                                          | 0.366105237 | 0.418289035 | 0.541441255 | 0.175336018  | 6.34E-06    | 4.38E-05    |
| TSS200 | XDH     | 2  | 31637622                                                                  | cg16862361                                                                    | 0.514609625 | 0.388478056 | 0.281634355 | -0.23297527  | 5.19E-12    | 5.51E-10    |
| TSS200 | XIRP1   | 3  | 39234137                                                                  | cg14694744                                                                    | 0.528002785 | 0.381264489 | 0.258521405 | -0.26948138  | 5.29E-16    | 8.34E-12    |
| TSS200 | XKR7    | 20 | 30555644                                                                  | cg16649052                                                                    | 0.2137369   | 0.264967606 | 0.386384568 | 0.172647668  | 0.001525389 | 0.006084962 |
| TSS200 | ZBTB38  | 3  | 141042988                                                                 | cg17495555                                                                    | 0.3893721   | 0.279197067 | 0.216185891 | -0.173186209 | 7.53E-12    | 6.98E-10    |
| TSS200 | ZBTB46  | 20 | 62436995/6243703<br>5/62437033                                            | cg02630914/cg21291<br>985/cg23831891                                          | 0.708620888 | 0.663210894 | 0.539145227 | -0.16947566  | 2.20E-08    | 2.96E-07    |
| TSS200 | ZFR2    | 19 | 3869086/3869172/3<br>869174                                               | cg13786089/cg15823<br>845/cg24876786                                          | 0.229491011 | 0.334829491 | 0.581684005 | 0.352192993  | 1.28E-08    | 1.87E-07    |
| TSS200 | ZG16    | 16 | 29789503                                                                  | cg06289826                                                                    | 0.50826192  | 0.415210722 | 0.345703609 | -0.162558311 | 4.38E-11    | 2.18E-09    |

|        |        |    |                                                                                                                                          |                                                                                                                                                  |             |             |             |             |             |             |
|--------|--------|----|------------------------------------------------------------------------------------------------------------------------------------------|--------------------------------------------------------------------------------------------------------------------------------------------------|-------------|-------------|-------------|-------------|-------------|-------------|
| TSS200 | ZIC1   | 3  | 147127012/147127<br>143/147127010/147 5<br>127137/147127097                                                                              | cg01227537/cg02647<br>941/cg14456683/cg1<br>4741939/cg18424634                                                                                   | 0.375980816 | 0.452008149 | 0.587370597 | 0.211389782 | 5.74E-09    | 9.52E-08    |
| TSS200 | ZIC4   | 3  | 147110322/147123<br>457/147124543/147<br>124523/147110378/<br>147110367/147123 11<br>429/147123475/147<br>124417/147110295/<br>147110229 | cg00235367/cg02387<br>803/cg05548555/cg0<br>6369327/cg07850418<br>/cg08812189/cg1679<br>0847/cg19516404/cg<br>21127068/cg2279650<br>9/cg27416372 | 0.323738729 | 0.38568618  | 0.520684173 | 0.196945444 | 1.08E-08    | 1.61E-07    |
| TSS200 | ZIK1   | 19 | 58095518/5809558<br>8/58095468/580955 6<br>81/58095445/58095<br>595                                                                      | cg00800512/cg01046<br>104/cg04342092/cg1<br>2060744/cg18435449<br>/cg18579862                                                                    | 0.370981891 | 0.542182535 | 0.688697526 | 0.317715635 | 5.18E-11    | 2.47E-09    |
| TSS200 | ZNF132 | 19 | 58951756/5895160<br>2/58951684/589515 6<br>99/58951672/58951<br>778                                                                      | cg00547077/cg03735<br>888/cg05249988/cg1<br>2042659/cg13877915<br>/cg24366702                                                                    | 0.176354115 | 0.30949705  | 0.432205603 | 0.255851487 | 1.37E-05    | 8.71E-05    |
| TSS200 | ZNF134 | 19 | 58125672/5812567 3<br>8/58125659                                                                                                         | cg02835214/cg07697<br>981/cg17655978                                                                                                             | 0.065203934 | 0.130905307 | 0.235507727 | 0.170303793 | 0.001996692 | 0.007753222 |
| TSS200 | ZNF135 | 19 | 58570454/5857042<br>7/58570419/585704 6<br>66/58570468/58570<br>491                                                                      | cg02473540/cg06454<br>760/cg08701621/cg0<br>9907936/cg16638540<br>/cg18430128                                                                    | 0.515488848 | 0.613870122 | 0.747959922 | 0.232471074 | 2.61E-11    | 1.54E-09    |
| TSS200 | ZNF154 | 19 | 58220657/5822066<br>2/58220718/582207 4<br>73                                                                                            | cg03234186/cg08668<br>790/cg12506930/cg2<br>6465391                                                                                              | 0.535933813 | 0.654501499 | 0.726430635 | 0.190496823 | 6.20E-09    | 1.01E-07    |
| TSS200 | ZNF167 | 3  | 44596538/4459651<br>2/44596684/445966 5<br>65/44596536                                                                                   | cg03646916/cg03795<br>847/cg08846783/cg1<br>9235095/cg21867345                                                                                   | 0.344665024 | 0.451960516 | 0.524335032 | 0.179670007 | 4.58E-05    | 0.000255995 |
| TSS200 | ZNF177 | 19 | 9473565/9473598/9<br>473691/9473684/94 6<br>73688/9473674                                                                                | cg05250458/cg05928<br>342/cg07788092/cg0<br>8065231/cg09578475<br>/cg13703871                                                                    | 0.499611157 | 0.613720865 | 0.713492797 | 0.21388164  | 1.26E-10    | 4.56E-09    |
| TSS200 | ZNF229 | 19 | 44952678/4495280<br>8/44952766/449526 6<br>65/44952730/44952<br>725                                                                      | cg09793279/cg09896<br>900/cg10166283/cg1<br>4056357/cg19915738<br>/cg22720041                                                                    | 0.294778567 | 0.383179016 | 0.492680462 | 0.197901896 | 2.68E-05    | 0.000158914 |
| TSS200 | ZNF254 | 19 | 24269890/2426996 2<br>8                                                                                                                  | cg09777776/cg17268<br>801                                                                                                                        | 0.223341051 | 0.255914403 | 0.389547305 | 0.166206254 | 0.00062037  | 0.002679433 |

|        |         |    |                                                                                                                                     |    |                                                                                                                                                                 |             |             |             |              |             |             |
|--------|---------|----|-------------------------------------------------------------------------------------------------------------------------------------|----|-----------------------------------------------------------------------------------------------------------------------------------------------------------------|-------------|-------------|-------------|--------------|-------------|-------------|
| TSS200 | ZNF256  | 19 | 58459218/5845914<br>2/58459139/584591<br>36/58459097/58459<br>248                                                                   | 6  | cg05119514/cg12555<br>306/cg16246961/cg2<br>2731359/cg23484087<br>/cg27388983                                                                                   | 0.101489456 | 0.147795324 | 0.335643988 | 0.234154532  | 8.55E-06    | 5.72E-05    |
| TSS200 | ZNF264  | 19 | 57702809/5770279<br>0/57702772/577026<br>97/57702803/57702<br>793                                                                   | 6  | cg12096988/cg15257<br>259/cg18576158/cg2<br>0715764/cg25800082<br>/cg26970847                                                                                   | 0.045250513 | 0.0991774   | 0.299380467 | 0.254129954  | 0.000223985 | 0.001073909 |
| TSS200 | ZNF280B | 22 | 22863655/2286366<br>3                                                                                                               | 2  | cg01223204/cg10719<br>664                                                                                                                                       | 0.630906455 | 0.482624208 | 0.339280491 | -0.291625964 | 2.94E-12    | 4.35E-10    |
| TSS200 | ZNF304  | 19 | 57862484/5786261<br>2/57862554/578626<br>27/57862480/57862<br>638                                                                   | 6  | cg00397851/cg13788<br>592/cg14015503/cg1<br>6848116/cg17849956<br>/cg21627760                                                                                   | 0.092965816 | 0.246682449 | 0.401504245 | 0.30853843   | 5.16E-07    | 4.68E-06    |
| TSS200 | ZNF331  | 19 | 54041329/5402411<br>0/54058440/540585<br>16/54041303/54023<br>999/54041308/5402<br>4023/54041163/540<br>58500/54024076/54<br>041251 | 12 | cg04522821/cg07952<br>047/cg08561667/cg0<br>8887146/cg10023249<br>/cg11332363/cg1560<br>7708/cg21525020/cg<br>22475353/cg2540722<br>7/cg26705425/cg272<br>96330 | 0.385072945 | 0.451300946 | 0.556284818 | 0.171211873  | 7.90E-07    | 6.88E-06    |
| TSS200 | ZNF334  | 20 | 45142244/4514225<br>8/45142214/451422<br>06/45142336                                                                                | 5  | cg07139762/cg10140<br>114/cg25828181/cg2<br>6238800/cg27385032                                                                                                  | 0.222102354 | 0.384134366 | 0.487326399 | 0.265224045  | 9.65E-08    | 1.06E-06    |
| TSS200 | ZNF347  | 19 | 53662467/5366243<br>9/53662353                                                                                                      | 3  | cg11081729/cg23052<br>615/cg27209110                                                                                                                            | 0.035441866 | 0.061775464 | 0.257478493 | 0.222036627  | 0.000596006 | 0.002583404 |
| TSS200 | ZNF354C | 5  | 178487465/178487<br>576/178487485/178<br>487500/178487481/<br>178487410                                                             | 6  | cg07470489/cg07515<br>940/cg08278489/cg1<br>0802132/cg11538128<br>/cg25942031                                                                                   | 0.228625668 | 0.322063171 | 0.46824192  | 0.239616253  | 3.86E-05    | 0.000219815 |
| TSS200 | ZNF415  | 19 | 53636226/5363630<br>9/53636229/536363<br>47                                                                                         | 4  | cg02886522/cg24892<br>510/cg26087117/cg2<br>7076144                                                                                                             | 0.222448654 | 0.324462103 | 0.383564948 | 0.161116294  | 0.002322917 | 0.008877868 |
| TSS200 | ZNF418  | 19 | 58446770/5844675<br>8/58446745/584467<br>83/58446898/58446<br>787                                                                   | 6  | cg11788523/cg12961<br>842/cg13668618/cg1<br>5060012/cg18673377<br>/cg21444693                                                                                   | 0.496433315 | 0.633033017 | 0.718227547 | 0.221794232  | 9.84E-10    | 2.22E-08    |
| TSS200 | ZNF43   | 19 | 22019044/2201909<br>4/22019059                                                                                                      | 3  | cg13858139/cg18875<br>716/cg19063564                                                                                                                            | 0.222900055 | 0.288537061 | 0.438528713 | 0.215628658  | 6.31E-07    | 5.60E-06    |



|        |        |    |                                                                                  |   |                                                                                                    |             |             |             |             |             |             |
|--------|--------|----|----------------------------------------------------------------------------------|---|----------------------------------------------------------------------------------------------------|-------------|-------------|-------------|-------------|-------------|-------------|
| TSS200 | ZNF454 | 5  | 178368071/178368123/178368160/178368185/178368205/178368183                      | 6 | cg02165355/cg03234732/cg10575261/cg16536329/cg20778451/cg23037403                                  | 0.412298729 | 0.466807437 | 0.627704703 | 0.215405974 | 5.12E-09    | 8.67E-08    |
| TSS200 | ZNF461 | 19 | 37157879/37157922/37157899/37157861/37157847/37157776                            | 6 | cg00498155/cg02306127/cg08066844/cg11419456/cg15131414/cg26613140                                  | 0.063699029 | 0.077798669 | 0.220632815 | 0.156933786 | 0.003388021 | 0.012462258 |
| TSS200 | ZNF471 | 19 | 57019069/57019016/57019022                                                       | 3 | cg00674365/cg11539780/cg19811761                                                                   | 0.426889097 | 0.439897093 | 0.604074329 | 0.177185232 | 0.000749437 | 0.003186268 |
| TSS200 | ZNF492 | 19 | 22816980/22817096/22817017/22817039/22816950                                     | 5 | cg05241461/cg06748831/cg11785166/cg23217946/cg24889512                                             | 0.29730671  | 0.401194691 | 0.561396058 | 0.264089348 | 1.98E-09    | 3.89E-08    |
| TSS200 | ZNF528 | 19 | 52900980/52900970/52900927/52900988/52900974                                     | 5 | cg09267217/cg12950007/cg20725941/cg22935432/cg27258025                                             | 0.142143558 | 0.254904129 | 0.339809338 | 0.197665781 | 0.001144182 | 0.004677887 |
| TSS200 | ZNF529 | 19 | 37096321/37064303/37096329/37064219/37064289/37064254/37064380/37096323/37064375 | 9 | cg02587316/cg03222310/cg05020604/cg07624650/cg07904448/cg09500430/cg17313483/cg18630667/cg27335720 | 0.263995848 | 0.338022123 | 0.441277201 | 0.177281353 | 1.56E-09    | 3.20E-08    |
| TSS200 | ZNF540 | 19 | 38042154/38042109/38042123                                                       | 3 | cg03320255/cg17431391/cg27389185                                                                   | 0.335901932 | 0.419555614 | 0.523873674 | 0.187971743 | 1.03E-07    | 1.13E-06    |
| TSS200 | ZNF542 | 19 | 56879662/56879432/56879369/56879554/56879559/56879418/56879571/56879613/56879645 | 9 | cg03146949/cg06942685/cg10638415/cg15708153/cg18787401/cg21493505/cg26309134/cg27062795/cg27477373 | 0.311414553 | 0.421541164 | 0.586709571 | 0.275295018 | 2.21E-09    | 4.27E-08    |
| TSS200 | ZNF543 | 19 | 57831834/57831819/57831705/57831816/57831849/57831684/57831678                   | 7 | cg01044608/cg01325460/cg01923740/cg14786398/cg17826375/cg20655405/cg23986470                       | 0.06741207  | 0.189605625 | 0.285694766 | 0.218282696 | 0.000319525 | 0.001475431 |
| TSS200 | ZNF544 | 19 | 58739944/58739986/58740004                                                       | 3 | cg00683895/cg01859739/cg16187092                                                                   | 0.042368174 | 0.090580143 | 0.222478302 | 0.180110128 | 0.002711621 | 0.010188122 |

|        |        |    |                                                                            |   |                                                                                              |             |             |             |             |             |             |
|--------|--------|----|----------------------------------------------------------------------------|---|----------------------------------------------------------------------------------------------|-------------|-------------|-------------|-------------|-------------|-------------|
| TSS200 | ZNF549 | 19 | 58038689/5803857<br>3/58038585/580386<br>33/58038588/58038<br>621          | 6 | cg01601746/cg06458<br>239/cg10729426/cg1<br>6697731/cg19060970<br>/cg20607331                | 0.285128359 | 0.456519629 | 0.650572955 | 0.365444596 | 3.64E-09    | 6.58E-08    |
| TSS200 | ZNF560 | 19 | 9609397/9609395/9<br>609335/9609422/96<br>09405/9609342                    | 6 | cg05221167/cg18568<br>589/cg18712973/cg1<br>9254119/cg19544372<br>/cg24818573                | 0.396684993 | 0.482161754 | 0.569145295 | 0.172460302 | 3.90E-10    | 1.07E-08    |
| TSS200 | ZNF568 | 19 | 37407060/3740704<br>1/37407214/374071<br>52/37407216/37407<br>123          | 6 | cg02370417/cg03584<br>288/cg05661809/cg1<br>5322783/cg20680720<br>/cg24052101                | 0.148157455 | 0.291012401 | 0.402926108 | 0.254768653 | 4.65E-05    | 0.000259182 |
| TSS200 | ZNF570 | 19 | 37959949/3795994<br>0/37959855/379598<br>64/37959961/37959<br>853          | 6 | cg04524120/cg07746<br>323/cg11237751/cg1<br>1737710/cg19655456<br>/cg21850254                | 0.068099201 | 0.114861064 | 0.227201987 | 0.159102787 | 0.000613586 | 0.00265304  |
| TSS200 | ZNF578 | 19 | 52956674/5295665<br>7/52956771/529566<br>83/52956729/52956<br>821          | 6 | cg11909748/cg12665<br>460/cg13461241/cg1<br>4582763/cg15449323<br>/cg21553182                | 0.43395605  | 0.516626312 | 0.657462475 | 0.223506425 | 1.30E-11    | 1.01E-09    |
| TSS200 | ZNF582 | 19 | 56904945/5690497<br>7/56904901/569049<br>97/56905032/56904<br>965/56905013 | 7 | cg02763101/cg08464<br>824/cg09568464/cg1<br>3916740/cg20984085<br>/cg22647407/cg2403<br>9631 | 0.192596768 | 0.301554531 | 0.450527057 | 0.257930289 | 3.19E-05    | 0.000185005 |
| TSS200 | ZNF586 | 19 | 58280832/5828089<br>1/58280927/582810<br>16/58281019/58280<br>994          | 6 | cg03584535/cg07685<br>728/cg13636880/cg1<br>8575209/cg20751795<br>/cg24298255                | 0.138086232 | 0.14550535  | 0.337383294 | 0.199297062 | 0.0029918   | 0.011123312 |
| TSS200 | ZNF625 | 19 | 12267676/1226768<br>5/12267592                                             | 3 | cg02914087/cg06429<br>617/cg17287725                                                         | 0.101405888 | 0.261550961 | 0.374411985 | 0.273006097 | 1.75E-05    | 0.00010938  |
| TSS200 | ZNF626 | 19 | 20844422                                                                   | 1 | cg01808171                                                                                   | 0.27876178  | 0.446592467 | 0.591171732 | 0.312409952 | 5.57E-09    | 9.29E-08    |
| TSS200 | ZNF660 | 3  | 44626453/4462626<br>9/44626304/446264<br>00                                | 4 | cg03340649/cg11542<br>789/cg15372508/cg2<br>1771463                                          | 0.128708754 | 0.209880812 | 0.33976017  | 0.211051416 | 6.55E-06    | 4.52E-05    |
| TSS200 | ZNF667 | 19 | 56988813/5698895<br>6/56988929/569889<br>35/56988778/56988<br>806          | 6 | cg00502665/cg07967<br>091/cg08687005/cg1<br>5805104/cg24464397<br>/cg26612735                | 0.335945727 | 0.442726872 | 0.572549724 | 0.236603998 | 4.29E-10    | 1.16E-08    |
| TSS200 | ZNF671 | 19 | 58239012/5823913<br>5                                                      | 2 | cg08048222/cg24016<br>939                                                                    | 0.220574027 | 0.315750092 | 0.473614271 | 0.253040244 | 3.04E-06    | 2.29E-05    |

|        |        |    |                                                                                         |   |                                                                                                         |             |             |             |              |             |             |
|--------|--------|----|-----------------------------------------------------------------------------------------|---|---------------------------------------------------------------------------------------------------------|-------------|-------------|-------------|--------------|-------------|-------------|
| TSS200 | ZNF677 | 19 | 53758289/5375829<br>7/53758233/537583<br>09                                             | 4 | cg06506966/cg09379<br>485/cg24114314/cg2<br>5404339                                                     | 0.141947758 | 0.240661004 | 0.43732722  | 0.295379463  | 8.83E-06    | 5.90E-05    |
| TSS200 | ZNF683 | 1  | 26699448                                                                                | 1 | cg06114363                                                                                              | 0.611410575 | 0.528032094 | 0.436944536 | -0.174466039 | 1.40E-05    | 8.88E-05    |
| TSS200 | ZNF75A | 16 | 3355361/3355411/3<br>355295                                                             | 3 | cg03004280/cg07306<br>531/cg16480692                                                                    | 0.240135958 | 0.370008164 | 0.553979262 | 0.313843304  | 9.75E-09    | 1.48E-07    |
| TSS200 | ZNF772 | 19 | 57989134/5798911<br>7/57989099/579889<br>64/57989027/57988<br>958                       | 6 | cg02298956/cg03526<br>224/cg03553544/cg2<br>3235772/cg24911359<br>/cg25419914                           | 0.115992377 | 0.203781421 | 0.334551282 | 0.218558904  | 6.50E-06    | 4.49E-05    |
| TSS200 | ZNF773 | 19 | 58011241/5801124<br>4/58011257                                                          | 3 | cg03612039/cg21117<br>673/cg22411784                                                                    | 0.088530294 | 0.154564377 | 0.266428029 | 0.177897735  | 0.000683576 | 0.002925978 |
| TSS200 | ZNF781 | 19 | 38183253/3818336<br>0/38183262/381832<br>59                                             | 4 | cg03611452/cg10701<br>051/cg14587524/cg2<br>5324105                                                     | 0.182495559 | 0.231975475 | 0.360267866 | 0.177772307  | 0.000298925 | 0.001388561 |
| TSS200 | ZNF788 | 19 | 12203066/1220302<br>9                                                                   | 2 | cg09489445/cg20773<br>651                                                                               | 0.156508032 | 0.269657983 | 0.497029508 | 0.340521476  | 2.40E-07    | 2.37E-06    |
| TSS200 | ZNF790 | 19 | 37329448/3732936<br>6/37329403/373293<br>30/37329475/37329<br>381/37329431              | 7 | cg06466031/cg07825<br>094/cg09567473/cg1<br>0400937/cg14195122<br>/cg18876786/cg2477<br>5172            | 0.09227895  | 0.14907985  | 0.280611718 | 0.188332768  | 0.000183121 | 0.00089567  |
| TSS200 | ZNF793 | 19 | 37997798/3799773<br>0/37997675/379978<br>31/37997817/37997<br>703/37997791/3799<br>7682 | 8 | cg02711801/cg07482<br>795/cg13181745/cg1<br>4732998/cg23296010<br>/cg24078985/cg2458<br>8375/cg25361907 | 0.087173797 | 0.202610546 | 0.329949659 | 0.242775862  | 2.34E-05    | 0.000140651 |
| TSS200 | ZNF814 | 19 | 58400494/5840057<br>4/58400559/584005<br>04                                             | 4 | cg15746696/cg18860<br>954/cg25400396/cg2<br>7112264                                                     | 0.34868974  | 0.438296465 | 0.601844211 | 0.253154471  | 1.26E-07    | 1.34E-06    |
| TSS200 | ZNF826 | 19 | 20607771                                                                                | 1 | cg25404914                                                                                              | 0.43316604  | 0.563562906 | 0.649471594 | 0.216305554  | 5.29E-06    | 3.72E-05    |
| TSS200 | ZNF829 | 19 | 37407284/3740737<br>4/37407214/374072<br>16/37407257                                    | 5 | cg02459604/cg03060<br>201/cg05661809/cg2<br>0680720/cg21761844                                          | 0.150904284 | 0.296808366 | 0.422480145 | 0.271575861  | 9.65E-05    | 0.000502624 |
| TSS200 | ZNF85  | 19 | 21106043/2110601<br>6/21106027/211060<br>36/21106053/21106<br>002                       | 6 | cg05310990/cg15690<br>721/cg19381810/cg2<br>1448033/cg23216292<br>/cg25464210                           | 0.283905038 | 0.392508137 | 0.572298856 | 0.288393818  | 1.88E-09    | 3.73E-08    |

|        |         |    |                                                                                                                        |    |                                                                                                                                                  |             |             |             |              |             |             |
|--------|---------|----|------------------------------------------------------------------------------------------------------------------------|----|--------------------------------------------------------------------------------------------------------------------------------------------------|-------------|-------------|-------------|--------------|-------------|-------------|
| TSS200 | ZNF876P | 4  | 206267/206282/206<br>232/206339                                                                                        | 4  | cg13535626/cg14186<br>187/cg18005867/cg2<br>3063647                                                                                              | 0.42917707  | 0.514725788 | 0.59120688  | 0.16202981   | 8.52E-08    | 9.56E-07    |
| TSS200 | ZNF879  | 5  | 178450758/178450<br>646/178450763/178<br>450595                                                                        | 4  | cg00601350/cg05244<br>234/cg17861295/cg2<br>5396971                                                                                              | 0.190092853 | 0.201390715 | 0.34142491  | 0.151332057  | 0.011926274 | 0.03798534  |
| TSS200 | ZNF880  | 19 | 52873085/5287312<br>5/52873106/528731<br>01/52873019                                                                   | 5  | cg02627531/cg09313<br>053/cg13393110/cg1<br>4224937/cg17650272                                                                                   | 0.167456923 | 0.248452032 | 0.394450676 | 0.226993753  | 0.000245164 | 0.001164105 |
| TSS200 | ZNF98   | 19 | 22605186/2260518<br>8/22605234/226051<br>51                                                                            | 4  | cg01436128/cg09768<br>178/cg10601582/cg1<br>3371839                                                                                              | 0.402760787 | 0.491516887 | 0.611237127 | 0.208476341  | 2.34E-10    | 7.12E-09    |
| TSS200 | ZSCAN12 | 6  | 28367644/2836757<br>1/28367544                                                                                         | 3  | cg18815343/cg25060<br>829/cg27577527                                                                                                             | 0.115882911 | 0.156114557 | 0.285765645 | 0.169882734  | 0.005423791 | 0.018922069 |
| TSS200 | ZSCAN18 | 19 | 58629828/5860976<br>4/58609793/586298<br>37/58629901/58629<br>967/58609744/5862<br>9975/58609806/586<br>09730/58609770 | 11 | cg03145999/cg07657<br>064/cg07924874/cg0<br>8873805/cg14231297<br>/cg17408527/cg1842<br>8688/cg18693673/cg<br>18888520/cg2203199<br>8/cg23229395 | 0.362318709 | 0.429500804 | 0.550129553 | 0.187810844  | 1.84E-05    | 0.000114047 |
| TSS200 | ZSCAN23 | 6  | 28411279/2841142<br>3/28411287/284112<br>85/28411378/28411<br>309                                                      | 6  | cg00651523/cg07836<br>142/cg09682330/cg1<br>4547644/cg21486944<br>/cg24703168                                                                    | 0.17786891  | 0.239535867 | 0.410736147 | 0.232867237  | 6.10E-07    | 5.44E-06    |
| TSS200 | ZSWIM2  | 2  | 187713986/187713<br>964/187713902/187<br>714068/187714055/<br>187714003                                                | 6  | cg05907046/cg07548<br>607/cg10396546/cg1<br>4762973/cg16516691<br>/cg24617723                                                                    | 0.238870902 | 0.309867499 | 0.478734976 | 0.239864075  | 3.47E-08    | 4.40E-07    |
| UTR5   | A2ML1   | 12 | 8975196/8975198                                                                                                        | 2  | cg03490200/cg13863<br>204                                                                                                                        | 0.798196353 | 0.682005733 | 0.605282773 | -0.19291358  | 5.85E-07    | 4.38E-06    |
| UTR5   | A4GNT   | 3  | 137851111                                                                                                              | 1  | cg17687282                                                                                                                                       | 0.555490305 | 0.439574633 | 0.352429409 | -0.203060896 | 4.65E-08    | 4.91E-07    |
| UTR5   | ABCA8   | 17 | 66942706/6695054<br>5                                                                                                  | 2  | cg03850529/cg21660<br>392                                                                                                                        | 0.63174626  | 0.588156994 | 0.461315914 | -0.170430346 | 8.89E-07    | 6.31E-06    |
| UTR5   | ABCB5   | 7  | 20656503/2068722<br>3/20689757                                                                                         | 3  | cg21202529/cg22066<br>521/cg22426329                                                                                                             | 0.781326097 | 0.685453402 | 0.590205333 | -0.191120763 | 1.04E-10    | 3.83E-09    |
| UTR5   | ABCC11  | 16 | 48266305                                                                                                               | 1  | cg07383076                                                                                                                                       | 0.5685022   | 0.461615661 | 0.343803182 | -0.224699018 | 4.87E-12    | 6.36E-10    |
| UTR5   | ABCC2   | 10 | 101542587                                                                                                              | 1  | cg14947634                                                                                                                                       | 0.80488305  | 0.72094985  | 0.644778177 | -0.160104873 | 0.00026172  | 0.001009608 |
| UTR5   | ACCSL   | 11 | 44069581                                                                                                               | 1  | cg23980760                                                                                                                                       | 0.65016958  | 0.530142694 | 0.413524532 | -0.236645048 | 3.77E-11    | 2.11E-09    |

|      |          |    |                                                         |   |                                                                                         |             |             |             |              |             |             |
|------|----------|----|---------------------------------------------------------|---|-----------------------------------------------------------------------------------------|-------------|-------------|-------------|--------------|-------------|-------------|
| UTR5 | ACER1    | 19 | 6333587/6333593                                         | 2 | cg12999109/cg19598519                                                                   | 0.732704423 | 0.602333214 | 0.524733277 | -0.207971145 | 1.37E-08    | 1.70E-07    |
| UTR5 | ACOT7    | 1  | 6420733/6453807/6420713/6445872/6445804                 | 5 | cg00821310/cg02568911/cg10219223/cg20414935/cg23095988                                  | 0.483786784 | 0.399748578 | 0.326385994 | -0.15740079  | 3.49E-11    | 2.03E-09    |
| UTR5 | ACSM5    | 16 | 20421627                                                | 1 | cg16736889                                                                              | 0.420887785 | 0.3644144   | 0.265794305 | -0.15509348  | 8.75E-07    | 6.23E-06    |
| UTR5 | ACSS3    | 12 | 81471882/81471867/81471884                              | 3 | cg10789281/cg13273396/cg26272220                                                        | 0.33108129  | 0.531606769 | 0.618354419 | 0.287273129  | 3.71E-08    | 4.05E-07    |
| UTR5 | ACTN2    | 1  | 236849942/236849966                                     | 2 | cg11215976/cg18770350                                                                   | 0.46544647  | 0.527563422 | 0.624981395 | 0.159534925  | 3.63E-07    | 2.93E-06    |
| UTR5 | ADAM28   | 8  | 24151625                                                | 1 | cg22915945                                                                              | 0.315348114 | 0.155805396 | 0.11973464  | -0.195613474 | 1.37E-07    | 1.25E-06    |
| UTR5 | ADAMTS1  | 21 | 28217676                                                | 1 | cg00472814                                                                              | 0.255875925 | 0.265509433 | 0.409879018 | 0.154003093  | 0.004952119 | 0.014068237 |
| UTR5 | ADAMTS18 | 16 | 77468893/77468850                                       | 2 | cg03238797/cg07568194                                                                   | 0.242036425 | 0.243960726 | 0.416279982 | 0.174243557  | 0.000215896 | 0.000852723 |
| UTR5 | ADAMTS5  | 21 | 28338836/28339334/28339262                              | 3 | cg03202077/cg15237494/cg23986671                                                        | 0.33495262  | 0.433389163 | 0.603467985 | 0.268515365  | 1.37E-08    | 1.70E-07    |
| UTR5 | ADAMTSL3 | 15 | 84323770/84323154/84322946/84323963                     | 4 | cg01152302/cg11611600/cg14230666/cg21377071                                             | 0.436340716 | 0.522116803 | 0.615921415 | 0.179580699  | 2.76E-10    | 7.96E-09    |
| UTR5 | ADARB2   | 10 | 1779432/1779667                                         | 2 | cg00467420/cg05307923                                                                   | 0.152456797 | 0.280145489 | 0.436033709 | 0.283576912  | 4.02E-07    | 3.18E-06    |
| UTR5 | ADCY8    | 8  | 132052779/132052702                                     | 2 | cg03120091/cg05229355                                                                   | 0.291294298 | 0.390955817 | 0.553517995 | 0.262223698  | 1.72E-09    | 3.10E-08    |
| UTR5 | ADCYAP1  | 18 | 905156/905382/905180/904963/905252/905127/905101/905177 | 8 | cg00128702/cg07211875/cg11773720/cg11850773/cg14200170/cg15194943/cg17059658/cg22388954 | 0.344375033 | 0.469901083 | 0.581655572 | 0.237280539  | 1.40E-08    | 1.74E-07    |
| UTR5 | ADH6     | 4  | 100140325/100140396                                     | 2 | cg06518271/cg08988543                                                                   | 0.581643105 | 0.443150483 | 0.352798286 | -0.228844819 | 6.58E-11    | 3.00E-09    |
| UTR5 | ADHFE1   | 8  | 67344720                                                | 1 | cg20912169                                                                              | 0.256459935 | 0.411193623 | 0.660422359 | 0.403962425  | 7.83E-11    | 3.23E-09    |
| UTR5 | ADIG     | 20 | 37209890                                                | 1 | cg17349406                                                                              | 0.62893823  | 0.49931435  | 0.415873145 | -0.213065085 | 4.12E-12    | 5.61E-10    |
| UTR5 | ADRA1A   | 8  | 26722635/26722861/26722496                              | 3 | cg07645844/cg17963840/cg21230493                                                        | 0.442435768 | 0.519901074 | 0.629701238 | 0.18726547   | 1.06E-07    | 1.01E-06    |
| UTR5 | AEBP1    | 7  | 44143998/44143993                                       | 2 | cg02126753/cg14249876                                                                   | 0.1369801   | 0.257681438 | 0.504188142 | 0.367208042  | 4.84E-07    | 3.72E-06    |
| UTR5 | AGR2     | 7  | 16841504/16844606                                       | 2 | cg02066184/cg21201572                                                                   | 0.587817313 | 0.470783503 | 0.342052432 | -0.245764881 | 1.52E-11    | 1.31E-09    |
| UTR5 | AGR3     | 7  | 16920271                                                | 1 | cg16702815                                                                              | 0.544244365 | 0.419571967 | 0.322374955 | -0.22186941  | 2.58E-11    | 1.74E-09    |
| UTR5 | AKNA     | 9  | 117150495                                               | 1 | cg14080475                                                                              | 0.2317446   | 0.393075678 | 0.524686191 | 0.292941591  | 4.74E-14    | 4.22E-11    |
| UTR5 | AKR1B1   | 7  | 134143823                                               | 1 | cg18416881                                                                              | 0.146743665 | 0.255080443 | 0.329499074 | 0.18275541   | 0.00348242  | 0.010288856 |

|      |          |    |                                                                                                                                                           |    |                                                                                                                                                                                           |             |             |             |              |             |             |
|------|----------|----|-----------------------------------------------------------------------------------------------------------------------------------------------------------|----|-------------------------------------------------------------------------------------------------------------------------------------------------------------------------------------------|-------------|-------------|-------------|--------------|-------------|-------------|
| UTR5 | AKR1B10  | 7  | 134212463                                                                                                                                                 | 1  | cg25171118                                                                                                                                                                                | 0.49394053  | 0.383134544 | 0.2866655   | -0.20727503  | 1.87E-10    | 5.82E-09    |
| UTR5 | ALDH3A1  | 17 | 19651653/1964897<br>2/19648925/196488<br>55/19648853/19650<br>069/19649051/1964<br>9293/19648718/196<br>51190/19649004/19<br>648970/19648846/1<br>9649191 | 14 | cg00516966/cg01471<br>036/cg05447343/cg0<br>6390079/cg11475454<br>/cg12258471/cg1278<br>7571/cg13295878/cg<br>15046965/cg1579681<br>9/cg15849060/cg189<br>57070/cg23098051/c<br>g23392390 | 0.529564653 | 0.440579233 | 0.376167973 | -0.15339668  | 1.34E-10    | 4.59E-09    |
| UTR5 | ALG1L    | 3  | 125655381/125655<br>407                                                                                                                                   | 2  | cg05084668/cg07473<br>553                                                                                                                                                                 | 0.68058229  | 0.463321817 | 0.311121282 | -0.369461008 | 2.07E-12    | 3.76E-10    |
| UTR5 | ALK      | 2  | 30144376/3014358<br>5/30143739/301441<br>52                                                                                                               | 4  | cg06905692/cg07443<br>217/cg12976501/cg1<br>8277754                                                                                                                                       | 0.264042581 | 0.363556944 | 0.467856574 | 0.203813992  | 6.02E-10    | 1.38E-08    |
| UTR5 | ALOX12B  | 17 | 7990985                                                                                                                                                   | 1  | cg05952715                                                                                                                                                                                | 0.777149395 | 0.686436261 | 0.583084073 | -0.194065322 | 1.15E-10    | 4.10E-09    |
| UTR5 | ALPI     | 2  | 233320854                                                                                                                                                 | 1  | cg08210297                                                                                                                                                                                | 0.528081415 | 0.441415483 | 0.3559656   | -0.172115815 | 8.65E-10    | 1.84E-08    |
| UTR5 | ALPP     | 2  | 233243398                                                                                                                                                 | 1  | cg19654061                                                                                                                                                                                | 0.600517355 | 0.462496261 | 0.365646864 | -0.234870491 | 8.19E-11    | 3.31E-09    |
| UTR5 | ALX4     | 11 | 44331629/4433162<br>3                                                                                                                                     | 2  | cg02504416/cg22931<br>182                                                                                                                                                                 | 0.231549365 | 0.276250108 | 0.424848216 | 0.193298851  | 4.13E-05    | 0.000192354 |
| UTR5 | AMPH     | 7  | 38670957/3867098<br>7/38670985/386710<br>01                                                                                                               | 4  | cg02383130/cg07926<br>691/cg10293925/cg2<br>6122980                                                                                                                                       | 0.220771274 | 0.30209     | 0.49313757  | 0.272366296  | 4.26E-06    | 2.50E-05    |
| UTR5 | AMTN     | 4  | 71384359                                                                                                                                                  | 1  | cg05329893                                                                                                                                                                                | 0.581913015 | 0.491348928 | 0.376376132 | -0.205536883 | 1.07E-06    | 7.43E-06    |
| UTR5 | ANK1     | 8  | 41754172/4152272<br>1/41754181/416550<br>78/41754060                                                                                                      | 5  | cg05166490/cg12439<br>423/cg17331296/cg2<br>6326633/cg26530758                                                                                                                            | 0.358238866 | 0.433221078 | 0.510682627 | 0.152443761  | 1.19E-07    | 1.11E-06    |
| UTR5 | ANKLE1   | 19 | 17392656                                                                                                                                                  | 1  | cg00433770                                                                                                                                                                                | 0.083000247 | 0.137272889 | 0.251535186 | 0.168534939  | 0.001854386 | 0.005824123 |
| UTR5 | ANKRD30B | 18 | 14748285/1474829<br>8/14748250                                                                                                                            | 3  | cg03014326/cg21281<br>009/cg24061208                                                                                                                                                      | 0.535134225 | 0.60648387  | 0.721314165 | 0.18617994   | 5.14E-06    | 2.96E-05    |
| UTR5 | ANKRD33B | 5  | 10564448/1056451<br>4                                                                                                                                     | 2  | cg07682578/cg09877<br>593                                                                                                                                                                 | 0.031648307 | 0.067566136 | 0.200698759 | 0.169050452  | 0.00116464  | 0.00384167  |
| UTR5 | ANKRD55  | 5  | 55529124/5541257<br>2                                                                                                                                     | 2  | cg11264935/cg22709<br>202                                                                                                                                                                 | 0.610293455 | 0.5384717   | 0.450503718 | -0.159789737 | 1.15E-07    | 1.08E-06    |
| UTR5 | ANO5     | 11 | 22214934/2221472<br>6                                                                                                                                     | 2  | cg19639184/cg20115<br>218                                                                                                                                                                 | 0.162117194 | 0.239535159 | 0.344009078 | 0.181891884  | 0.001526342 | 0.004886658 |

|      |          |    |                                                                                                    |   |                                                                                                                        |             |             |             |              |             |             |
|------|----------|----|----------------------------------------------------------------------------------------------------|---|------------------------------------------------------------------------------------------------------------------------|-------------|-------------|-------------|--------------|-------------|-------------|
| UTR5 | ANXA2    | 15 | 60689285/6068801<br>0/60689670/606830<br>59/60687284/60690 9<br>026/60688948/6068<br>9852/60688622 |   | cg02072495/cg06738<br>887/cg09533293/cg1<br>1681321/cg13313836<br>/cg13634501/cg1439<br>7690/cg22293140/cg<br>22365276 | 0.420798919 | 0.317853054 | 0.229039977 | -0.191758941 | 1.55E-12    | 3.31E-10    |
| UTR5 | ANXA9    | 1  | 150954826/150954<br>554                                                                            | 2 | cg13320146/cg20437<br>604                                                                                              | 0.51022676  | 0.410074872 | 0.3194991   | -0.19072766  | 7.53E-11    | 3.22E-09    |
| UTR5 | AOAH     | 7  | 36764019/3676414<br>0/36764082                                                                     | 3 | cg14451276/cg18652<br>683/cg25733272                                                                                   | 0.549081075 | 0.630627097 | 0.711896268 | 0.162815193  | 1.18E-09    | 2.32E-08    |
| UTR5 | AOX1     | 2  | 201450731/201450<br>743                                                                            | 2 | cg12627583/cg13875<br>120                                                                                              | 0.148069937 | 0.191967324 | 0.30264263  | 0.154572693  | 0.004463237 | 0.012799565 |
| UTR5 | APCS     | 1  | 159557632                                                                                          | 1 | cg03856044                                                                                                             | 0.480257805 | 0.425551878 | 0.307269341 | -0.172988464 | 7.47E-11    | 3.22E-09    |
| UTR5 | APOBEC3A | 22 | 39353650/3935355<br>0                                                                              | 2 | cg21345826/cg27504<br>369                                                                                              | 0.587978545 | 0.466772394 | 0.394652645 | -0.1933259   | 1.24E-09    | 2.41E-08    |
| UTR5 | AQP5     | 12 | 50355307                                                                                           | 1 | cg15336765                                                                                                             | 0.174818933 | 0.236789049 | 0.489375127 | 0.314556195  | 1.46E-10    | 4.86E-09    |
| UTR5 | ARHGAP20 | 11 | 110583036/110583<br>377                                                                            | 2 | cg03813168/cg26578<br>621                                                                                              | 0.096245742 | 0.161655252 | 0.26764626  | 0.171400518  | 0.000212975 | 0.00084312  |
| UTR5 | ARHGAP28 | 18 | 6835382/6834653                                                                                    | 2 | cg00402547/cg27314<br>249                                                                                              | 0.69040329  | 0.60615055  | 0.53742815  | -0.15297514  | 7.13E-09    | 9.90E-08    |
| UTR5 | ARL14    | 3  | 160395073                                                                                          | 1 | cg11896170                                                                                                             | 0.58850083  | 0.444467894 | 0.350764123 | -0.237736707 | 1.67E-12    | 3.47E-10    |
| UTR5 | ARMC3    | 10 | 23217173/2321701<br>7                                                                              | 2 | cg11710969/cg15193<br>782                                                                                              | 0.220265833 | 0.254205498 | 0.38360255  | 0.163336717  | 0.000177634 | 0.000714106 |
| UTR5 | ASB10    | 7  | 150884848/150884<br>429/150884914                                                                  | 3 | cg16537044/cg16564<br>894/cg26159905                                                                                   | 0.60730881  | 0.506939487 | 0.397815974 | -0.209492836 | 8.73E-11    | 3.43E-09    |
| UTR5 | ASB14    | 3  | 57326068                                                                                           | 1 | cg21455927                                                                                                             | 0.645924565 | 0.524519633 | 0.434560355 | -0.21136421  | 1.21E-12    | 2.89E-10    |
| UTR5 | ASB15    | 7  | 123249130/123252<br>579                                                                            | 2 | cg02300083/cg26067<br>096                                                                                              | 0.61231217  | 0.532766017 | 0.371533668 | -0.240778502 | 4.45E-07    | 3.46E-06    |
| UTR5 | ASCL3    | 11 | 8964544/8964505                                                                                    | 2 | cg02127238/cg18920<br>846                                                                                              | 0.818647735 | 0.756566697 | 0.657828745 | -0.16081899  | 2.99E-06    | 1.85E-05    |
| UTR5 | ASCL4    | 12 | 108168562/108168<br>987/108168824                                                                  | 3 | cg01952953/cg04290<br>586/cg13721169                                                                                   | 0.503941785 | 0.630292217 | 0.746275273 | 0.242333488  | 2.84E-11    | 1.85E-09    |
| UTR5 | ASTN1    | 1  | 177133946/177134<br>019                                                                            | 2 | cg06650419/cg14659<br>404                                                                                              | 0.207876626 | 0.272115327 | 0.411315161 | 0.203438536  | 4.18E-07    | 3.29E-06    |
| UTR5 | ATP10A   | 15 | 26108263                                                                                           | 1 | cg20174066                                                                                                             | 0.210780559 | 0.283416574 | 0.366172759 | 0.155392201  | 8.55E-06    | 4.69E-05    |
| UTR5 | ATP1B2   | 17 | 7554827/7554666/7<br>554357/7554513/75<br>54681                                                    | 5 | cg00053373/cg02705<br>837/cg03554817/cg0<br>6200013/cg22448889                                                         | 0.120678939 | 0.205364455 | 0.328424325 | 0.207745385  | 2.84E-06    | 1.76E-05    |
| UTR5 | B3GNT6   | 11 | 76750184/7674751<br>3/76750413                                                                     | 3 | cg01974921/cg06085<br>657/cg09467902                                                                                   | 0.678626115 | 0.531252989 | 0.432564527 | -0.246061588 | 7.50E-11    | 3.22E-09    |
| UTR5 | BAIAP2L2 | 22 | 38506623/3850658<br>9                                                                              | 2 | cg17838773/cg27505<br>627                                                                                              | 0.585663558 | 0.461452011 | 0.364674816 | -0.220988742 | 5.72E-11    | 2.74E-09    |
| UTR5 | BARHL2   | 1  | 91182777                                                                                           | 1 | cg18322569                                                                                                             | 0.486139255 | 0.506292575 | 0.753573723 | 0.267434468  | 6.83E-05    | 0.00030275  |

|      |          |    |                                                                                                                                       |    |                                                                                                                                                  |             |             |             |              |             |             |
|------|----------|----|---------------------------------------------------------------------------------------------------------------------------------------|----|--------------------------------------------------------------------------------------------------------------------------------------------------|-------------|-------------|-------------|--------------|-------------|-------------|
| UTR5 | BCAT1    | 12 | 25102274/2510207<br>2                                                                                                                 | 2  | cg04011247/cg10764<br>357                                                                                                                        | 0.202790783 | 0.308302367 | 0.516316832 | 0.313526049  | 1.76E-09    | 3.17E-08    |
| UTR5 | BCL2L15  | 1  | 114430031                                                                                                                             | 1  | cg24550026                                                                                                                                       | 0.46598524  | 0.326013478 | 0.250770314 | -0.215214926 | 1.16E-11    | 1.11E-09    |
| UTR5 | BDKRB1   | 14 | 96729656/9672795<br>5                                                                                                                 | 2  | cg05158854/cg23347<br>654                                                                                                                        | 0.43763738  | 0.290761967 | 0.20292176  | -0.23471562  | 3.63E-13    | 1.45E-10    |
| UTR5 | BEND4    | 4  | 42154385/4215484<br>0                                                                                                                 | 2  | cg05674475/cg10172<br>669                                                                                                                        | 0.214397236 | 0.342908991 | 0.455064775 | 0.240667539  | 1.39E-07    | 1.26E-06    |
| UTR5 | BEND5    | 1  | 49242513/4924251<br>9                                                                                                                 | 2  | cg11666087/cg16573<br>178                                                                                                                        | 0.065825382 | 0.246131481 | 0.318706693 | 0.25288131   | 0.000244154 | 0.000950415 |
| UTR5 | BEST3    | 12 | 70082885/7009300<br>8/70092840                                                                                                        | 3  | cg12596182/cg17277<br>939/cg23591609                                                                                                             | 0.585985325 | 0.471389889 | 0.406789225 | -0.1791961   | 2.92E-10    | 8.28E-09    |
| UTR5 | BHLHE23  | 20 | 61638149                                                                                                                              | 1  | cg21161253                                                                                                                                       | 0.108113161 | 0.261707707 | 0.349949555 | 0.241836394  | 7.75E-07    | 5.61E-06    |
| UTR5 | BIRC7    | 20 | 61867349                                                                                                                              | 1  | cg00895528                                                                                                                                       | 0.476063275 | 0.387165683 | 0.313177091 | -0.162886184 | 1.43E-08    | 1.77E-07    |
| UTR5 | BNIP1    | 1  | 151009588                                                                                                                             | 1  | cg11584936                                                                                                                                       | 0.86080939  | 0.759247922 | 0.646079755 | -0.214729635 | 1.82E-06    | 1.18E-05    |
| UTR5 | BRUNOL4  | 18 | 35145983/3514565<br>0                                                                                                                 | 2  | cg11154070/cg19492<br>446                                                                                                                        | 0.24945564  | 0.282276786 | 0.408337759 | 0.158882119  | 0.000224815 | 0.000883731 |
| UTR5 | BTNL3    | 5  | 180415938                                                                                                                             | 1  | cg02720155                                                                                                                                       | 0.51763518  | 0.42233935  | 0.341113614 | -0.176521566 | 1.48E-07    | 1.33E-06    |
| UTR5 | BVES     | 6  | 105584149/105584<br>216                                                                                                               | 2  | cg20624391/cg25280<br>433                                                                                                                        | 0.19679352  | 0.254422961 | 0.366656853 | 0.169863333  | 0.000714712 | 0.002471216 |
| UTR5 | C10orf81 | 10 | 115514781                                                                                                                             | 1  | cg18203466                                                                                                                                       | 0.55010488  | 0.414215044 | 0.325414677 | -0.224690203 | 1.98E-11    | 1.58E-09    |
| UTR5 | C10orf90 | 10 | 128209980                                                                                                                             | 1  | cg24143287                                                                                                                                       | 0.67340542  | 0.465538717 | 0.322228568 | -0.351176852 | 1.91E-12    | 3.63E-10    |
| UTR5 | C10orf99 | 10 | 85933586                                                                                                                              | 1  | cg10737718                                                                                                                                       | 0.41991726  | 0.323038672 | 0.257776177 | -0.162141083 | 4.24E-11    | 2.29E-09    |
| UTR5 | C11orf41 | 11 | 33563946                                                                                                                              | 1  | cg22937632                                                                                                                                       | 0.678477485 | 0.593174794 | 0.471460355 | -0.20701713  | 1.13E-08    | 1.46E-07    |
| UTR5 | C11orf53 | 11 | 111126790/111148<br>753                                                                                                               | 2  | cg19964761/cg27649<br>396                                                                                                                        | 0.807520505 | 0.7183644   | 0.614021768 | -0.193498737 | 1.20E-05    | 6.32E-05    |
| UTR5 | C11orf87 | 11 | 109293614/109293<br>070/109292894/109<br>293216/109294168/<br>109294233/109293<br>945/109294044/109<br>293068/109294190/<br>109294069 | 11 | cg00830817/cg04861<br>929/cg06719900/cg0<br>7142201/cg07180307<br>/cg07428323/cg1045<br>4766/cg13952556/cg<br>15948088/cg2185240<br>8/cg26014266 | 0.293567021 | 0.379175347 | 0.557336049 | 0.263769028  | 1.85E-09    | 3.29E-08    |
| UTR5 | C11orf94 | 11 | 45928805                                                                                                                              | 1  | cg04310460                                                                                                                                       | 0.54808115  | 0.430428489 | 0.356957232 | -0.191123918 | 5.65E-11    | 2.74E-09    |
| UTR5 | C12orf59 | 12 | 10331614/1033166<br>6                                                                                                                 | 2  | cg25494227/cg26718<br>420                                                                                                                        | 0.6664606   | 0.575493056 | 0.485267255 | -0.181193345 | 4.23E-07    | 3.31E-06    |
| UTR5 | C13orf38 | 13 | 36871878/3687164<br>6/36871962/368717<br>54/36871948/36871<br>943/36867876                                                            | 7  | cg04902286/cg07525<br>003/cg13258563/cg1<br>3455704/cg15167956<br>/cg26439710/cg2682<br>2330                                                     | 0.312398906 | 0.380508123 | 0.469342215 | 0.156943309  | 5.49E-06    | 3.14E-05    |



|      |           |    |                                                                     |   |                                                                                                         |             |             |             |              |             |             |
|------|-----------|----|---------------------------------------------------------------------|---|---------------------------------------------------------------------------------------------------------|-------------|-------------|-------------|--------------|-------------|-------------|
| UTR5 | C14orf180 | 14 | 105051261/105048<br>339/105048531/105 5<br>046247/105052560         |   | cg01952537/cg04141<br>770/cg13276428/cg1<br>5421520/cg18313013                                          | 0.556174145 | 0.442103461 | 0.37211446  | -0.184059685 | 1.19E-14    | 3.57E-11    |
| UTR5 | C14orf39  | 14 | 60952097/6095259<br>9/60952196/609524 5<br>05/60952738              |   | cg05255275/cg18240<br>143/cg18921771/cg2<br>3989821/cg27398547                                          | 0.28767244  | 0.40725815  | 0.622664336 | 0.334991896  | 6.54E-11    | 2.99E-09    |
| UTR5 | C15orf62  | 15 | 41062273/4106222<br>4                                               | 2 | cg05638787/cg07306<br>253                                                                               | 0.452227933 | 0.362755947 | 0.286699936 | -0.165527996 | 2.87E-11    | 1.86E-09    |
| UTR5 | C16orf11  | 16 | 612306/611985/611<br>384/613142/610895<br>/610499/611177/61<br>3006 | 8 | cg01994216/cg05325<br>887/cg07576033/cg0<br>8864283/cg08950915<br>/cg23008708/cg2416<br>0381/cg27558697 | 0.522122171 | 0.441372156 | 0.369168685 | -0.152953486 | 1.35E-12    | 3.05E-10    |
| UTR5 | C17orf104 | 17 | 42733976                                                            | 1 | cg22190438                                                                                              | 0.175055483 | 0.221011376 | 0.410953534 | 0.235898052  | 1.34E-06    | 9.08E-06    |
| UTR5 | C17orf46  | 17 | 43339476                                                            | 1 | cg17222164                                                                                              | 0.110370772 | 0.218942219 | 0.334238974 | 0.223868202  | 0.000188332 | 0.000754179 |
| UTR5 | C17orf47  | 17 | 56621578                                                            | 1 | cg26956135                                                                                              | 0.53089084  | 0.426637511 | 0.297128173 | -0.233762667 | 1.23E-13    | 7.31E-11    |
| UTR5 | C19orf21  | 19 | 751241/751159/752<br>860/755197                                     | 4 | cg04245402/cg14052<br>044/cg19546012/cg2<br>6813907                                                     | 0.557156342 | 0.448712193 | 0.352329909 | -0.204826433 | 9.75E-11    | 3.70E-09    |
| UTR5 | C19orf33  | 19 | 38794845/3879481<br>4                                               | 2 | cg00412772/cg11272<br>232                                                                               | 0.434242788 | 0.347337644 | 0.281336405 | -0.152906383 | 8.75E-10    | 1.85E-08    |
| UTR5 | C19orf75  | 19 | 51762753/5176111<br>6                                               | 2 | cg05619872/cg21930<br>712                                                                               | 0.50822113  | 0.406950344 | 0.293409632 | -0.214811498 | 2.13E-11    | 1.64E-09    |
| UTR5 | C1orf106  | 1  | 200864307/200864<br>223                                             | 2 | cg00971747/cg16257<br>559                                                                               | 0.53500073  | 0.427568308 | 0.344432727 | -0.190568003 | 2.74E-11    | 1.81E-09    |
| UTR5 | C1orf173  | 1  | 75139347/7513936<br>4                                               | 2 | cg24155871/cg27393<br>126                                                                               | 0.295957565 | 0.367192178 | 0.573761716 | 0.277804151  | 1.35E-07    | 1.24E-06    |
| UTR5 | C1orf226  | 1  | 162351664                                                           | 1 | cg25212701                                                                                              | 0.509942485 | 0.389087383 | 0.300863691 | -0.209078794 | 3.86E-12    | 5.51E-10    |
| UTR5 | C1orf70   | 1  | 1475737                                                             | 1 | cg16601494                                                                                              | 0.18564747  | 0.361693367 | 0.665361532 | 0.479714062  | 1.67E-10    | 5.40E-09    |
| UTR5 | C1QC      | 1  | 22970339/2297013<br>2                                               | 2 | cg00136477/cg17104<br>151                                                                               | 0.497507993 | 0.381689306 | 0.256685968 | -0.240822024 | 3.12E-13    | 1.29E-10    |
| UTR5 | C1QL2     | 2  | 119916017/119916<br>431                                             | 2 | cg00690148/cg26530<br>498                                                                               | 0.298093565 | 0.394724053 | 0.512992241 | 0.214898676  | 4.77E-09    | 7.20E-08    |
| UTR5 | C1QTNF8   | 16 | 1145964/1146194                                                     | 2 | cg06208229/cg07412<br>281                                                                               | 0.54548979  | 0.466190267 | 0.382244541 | -0.163245249 | 1.29E-10    | 4.43E-09    |
| UTR5 | C20orf103 | 20 | 9495495/9495326/9<br>495404                                         | 3 | cg12650655/cg20191<br>310/cg26582643                                                                    | 0.155063925 | 0.172190491 | 0.307051689 | 0.151987763  | 0.005606782 | 0.015687355 |
| UTR5 | C20orf71  | 20 | 31805291/3180518<br>2                                               | 2 | cg09742177/cg15131<br>258                                                                               | 0.67492102  | 0.584522178 | 0.477997677 | -0.196923343 | 2.99E-05    | 0.000143808 |
| UTR5 | C4BPB     | 1  | 207262428/207262<br>553/207262706                                   | 3 | cg14740771/cg21571<br>160/cg26407558                                                                    | 0.428842915 | 0.337610065 | 0.25503923  | -0.173803685 | 7.93E-12    | 8.70E-10    |
| UTR5 | C4orf26   | 4  | 76481269                                                            | 1 | cg16870215                                                                                              | 0.51492345  | 0.433237433 | 0.347102814 | -0.167820636 | 4.75E-09    | 7.18E-08    |

|      |          |    |                                                                                                                                              |    |                                                                                                                                                                            |             |             |             |              |             |             |
|------|----------|----|----------------------------------------------------------------------------------------------------------------------------------------------|----|----------------------------------------------------------------------------------------------------------------------------------------------------------------------------|-------------|-------------|-------------|--------------|-------------|-------------|
| UTR5 | C4orf49  | 4  | 140201433                                                                                                                                    | 1  | cg18065318                                                                                                                                                                 | 0.24092675  | 0.284793844 | 0.398248473 | 0.157321723  | 0.000128356 | 0.000533641 |
| UTR5 | C6orf105 | 6  | 11779039                                                                                                                                     | 1  | cg26761744                                                                                                                                                                 | 0.56337731  | 0.424441856 | 0.353218586 | -0.210158724 | 4.48E-10    | 1.11E-08    |
| UTR5 | C6orf222 | 6  | 36303570/3630445<br>6                                                                                                                        | 2  | cg11562147/cg13319<br>417                                                                                                                                                  | 0.54654998  | 0.457730333 | 0.395577541 | -0.150972439 | 7.36E-11    | 3.21E-09    |
| UTR5 | C8orf34  | 8  | 69351585/6935092<br>7                                                                                                                        | 2  | cg00280504/cg22199<br>118                                                                                                                                                  | 0.331943675 | 0.235495517 | 0.18020561  | -0.151738065 | 3.21E-11    | 1.98E-09    |
| UTR5 | C8orf46  | 8  | 67405742                                                                                                                                     | 1  | cg23704362                                                                                                                                                                 | 0.666288825 | 0.594698256 | 0.515657332 | -0.150631493 | 1.50E-05    | 7.74E-05    |
| UTR5 | C8orf85  | 8  | 117950473                                                                                                                                    | 1  | cg05996052                                                                                                                                                                 | 0.367959095 | 0.481860539 | 0.645422682 | 0.277463587  | 1.08E-12    | 2.76E-10    |
| UTR5 | C9orf152 | 9  | 112970404                                                                                                                                    | 1  | cg09596614                                                                                                                                                                 | 0.476353965 | 0.383152094 | 0.307880405 | -0.16847356  | 3.32E-10    | 9.10E-09    |
| UTR5 | C9orf47  | 9  | 91605893                                                                                                                                     | 1  | cg12972233                                                                                                                                                                 | 0.4305414   | 0.565103506 | 0.613298873 | 0.182757473  | 6.36E-07    | 4.70E-06    |
| UTR5 | C9orf50  | 9  | 132383003                                                                                                                                    | 1  | cg09731694                                                                                                                                                                 | 0.31731967  | 0.549861672 | 0.697157327 | 0.379837657  | 6.72E-16    | 4.47E-12    |
| UTR5 | CA10     | 17 | 50236572/5023720<br>5/50236087/502353<br>28/50236465/50235<br>737/50235393/5023<br>6765/50235965/502<br>37267/50235279/50<br>236344/50237315 | 13 | cg04881814/cg07398<br>767/cg08034077/cg1<br>4054928/cg14056110<br>/cg14073722/cg2040<br>5017/cg21328033/cg<br>22702328/cg2285525<br>5/cg24341611/cg250<br>39722/cg25592977 | 0.409826752 | 0.479281985 | 0.619400012 | 0.20957326   | 6.25E-10    | 1.42E-08    |
| UTR5 | CACNA1A  | 19 | 13617094/1361709<br>1                                                                                                                        | 2  | cg17509967/cg22491<br>927                                                                                                                                                  | 0.24286006  | 0.353768224 | 0.512181286 | 0.269321226  | 3.76E-07    | 3.01E-06    |
| UTR5 | CACNG3   | 16 | 24267226/2426739<br>9/24267559/242675<br>26/24266905                                                                                         | 5  | cg02692912/cg04441<br>477/cg04543289/cg0<br>7514158/cg17234150                                                                                                             | 0.338346394 | 0.442153518 | 0.596171655 | 0.257825261  | 2.71E-09    | 4.47E-08    |
| UTR5 | CACNG8   | 19 | 54466297                                                                                                                                     | 1  | cg08653692                                                                                                                                                                 | 0.27789309  | 0.375280813 | 0.674200927 | 0.396307837  | 1.20E-09    | 2.35E-08    |
| UTR5 | CADM2    | 3  | 85008678/8500858<br>7/85008156                                                                                                               | 3  | cg05152589/cg13331<br>200/cg26113636                                                                                                                                       | 0.306559718 | 0.336317308 | 0.462555287 | 0.155995569  | 1.36E-06    | 9.21E-06    |
| UTR5 | CALHM3   | 10 | 105238873/105238<br>964                                                                                                                      | 2  | cg04804772/cg11957<br>248                                                                                                                                                  | 0.55451158  | 0.463332944 | 0.39100485  | -0.16350673  | 5.45E-11    | 2.67E-09    |
| UTR5 | CALML4   | 15 | 68498251/6849799<br>2                                                                                                                        | 2  | cg05338167/cg11530<br>995                                                                                                                                                  | 0.45808637  | 0.373735086 | 0.304724143 | -0.153362227 | 6.76E-11    | 3.04E-09    |
| UTR5 | CAPN14   | 2  | 31440349/3143968<br>7                                                                                                                        | 2  | cg04132353/cg15941<br>014                                                                                                                                                  | 0.500511375 | 0.314608206 | 0.241193082 | -0.259318293 | 3.17E-10    | 8.78E-09    |
| UTR5 | CASS4    | 20 | 54987330/5498727<br>0                                                                                                                        | 2  | cg10463299/cg14303<br>122                                                                                                                                                  | 0.52536621  | 0.617127156 | 0.681160934 | 0.155794724  | 8.83E-07    | 6.28E-06    |
| UTR5 | CAV3     | 3  | 8775516                                                                                                                                      | 1  | cg06072564                                                                                                                                                                 | 0.72348022  | 0.657715439 | 0.519373645 | -0.204106575 | 7.73E-08    | 7.69E-07    |

|      |         |    |                                                                                                                        |    |                                                                                                                                                  |             |             |             |              |             |             |
|------|---------|----|------------------------------------------------------------------------------------------------------------------------|----|--------------------------------------------------------------------------------------------------------------------------------------------------|-------------|-------------|-------------|--------------|-------------|-------------|
| UTR5 | CBLN2   | 18 | 70210483/7021043<br>3/70209432/702095<br>51/70210025/70210 9<br>955/70210494/7021<br>0819/70211515                     |    | cg01908010/cg03561<br>455/cg13478228/cg1<br>5733692/cg17952513<br>/cg18596362/cg1920<br>2058/cg21529405/cg<br>21902544                           | 0.239248293 | 0.344807051 | 0.495925716 | 0.256677423  | 1.24E-09    | 2.41E-08    |
| UTR5 | CBLN4   | 20 | 54579355/5457981<br>4                                                                                                  | 2  | cg02501779/cg14184<br>078                                                                                                                        | 0.51584526  | 0.547781811 | 0.713582132 | 0.197736872  | 2.71E-09    | 4.47E-08    |
| UTR5 | CBS     | 21 | 44493901/4449472<br>2/44496012/444949<br>97/44495495/44494<br>906/44495595/4449<br>5288/44495223/444<br>95141/44495796 | 11 | cg01071153/cg01193<br>064/cg03559229/cg1<br>0457056/cg14364356<br>/cg15108590/cg1995<br>0455/cg24437122/cg<br>24496978/cg2614122<br>8/cg27024932 | 0.212937344 | 0.236612672 | 0.366228591 | 0.153291247  | 0.00020507  | 0.00081594  |
| UTR5 | CCDC105 | 19 | 15121591/1512159<br>6                                                                                                  | 2  | cg03928546/cg06522<br>681                                                                                                                        | 0.439871208 | 0.515696853 | 0.689640884 | 0.249769677  | 1.44E-09    | 2.69E-08    |
| UTR5 | CCDC114 | 19 | 48823178                                                                                                               | 1  | cg25533551                                                                                                                                       | 0.57711474  | 0.477702278 | 0.392349423 | -0.184765317 | 9.75E-11    | 3.70E-09    |
| UTR5 | CCDC30  | 1  | 43001072                                                                                                               | 1  | cg24501381                                                                                                                                       | 0.781376155 | 0.676996133 | 0.606270155 | -0.175106    | 1.72E-09    | 3.10E-08    |
| UTR5 | CCDC37  | 3  | 126113784/126113<br>918/126114064                                                                                      | 3  | cg00891278/cg19628<br>148/cg20707970                                                                                                             | 0.357535978 | 0.414504994 | 0.58240912  | 0.224873143  | 2.09E-07    | 1.80E-06    |
| UTR5 | CCDC42  | 17 | 8647944/8648035                                                                                                        | 2  | cg06468695/cg10057<br>436                                                                                                                        | 0.7384243   | 0.602032211 | 0.476622014 | -0.261802286 | 5.68E-12    | 6.95E-10    |
| UTR5 | CCDC8   | 19 | 46916741/4691652<br>0/46916588                                                                                         | 3  | cg06747432/cg15984<br>661/cg25987744                                                                                                             | 0.134449806 | 0.228445801 | 0.356166245 | 0.221716439  | 1.33E-06    | 9.00E-06    |
| UTR5 | CCNA1   | 13 | 37006063/3700612<br>7/37006265/370067<br>48/37006611/37006<br>734/37006340/3700<br>6107/37006116/370<br>06133          | 10 | cg02478448/cg05137<br>358/cg10158541/cg1<br>2571423/cg13060997<br>/cg16422907/cg1749<br>5912/cg18348647/cg<br>18948722/cg2698434<br>3            | 0.442595546 | 0.55143001  | 0.676126255 | 0.233530709  | 1.24E-12    | 2.91E-10    |
| UTR5 | CCT8L2  | 22 | 17073594                                                                                                               | 1  | cg07443748                                                                                                                                       | 0.56714542  | 0.458567933 | 0.362340368 | -0.204805052 | 3.14E-11    | 1.96E-09    |
| UTR5 | CD300LB | 17 | 72527607                                                                                                               | 1  | cg14075731                                                                                                                                       | 0.48006532  | 0.375505917 | 0.309218268 | -0.170847052 | 4.79E-08    | 5.03E-07    |
| UTR5 | CD34    | 1  | 208084456/208084<br>640/208084436                                                                                      | 3  | cg04292718/cg19591<br>881/cg21455438                                                                                                             | 0.243883901 | 0.37397278  | 0.541480049 | 0.297596148  | 3.75E-09    | 5.88E-08    |
| UTR5 | CD38    | 4  | 15779999/1578001<br>1                                                                                                  | 2  | cg02183671/cg24819<br>835                                                                                                                        | 0.21345019  | 0.439392783 | 0.552727605 | 0.339277415  | 6.81E-09    | 9.55E-08    |
| UTR5 | CDH10   | 5  | 24644878/2462279<br>1                                                                                                  | 2  | cg00068408/cg12559<br>474                                                                                                                        | 0.188328965 | 0.251849002 | 0.367313545 | 0.17898458   | 0.000262701 | 0.001013078 |

|      |        |    |                                                                                                                                                                                                                                                                                                                                           |    |                                                                                                                                                                                                                                                                                                                                                                                                                   |             |             |             |              |          |             |
|------|--------|----|-------------------------------------------------------------------------------------------------------------------------------------------------------------------------------------------------------------------------------------------------------------------------------------------------------------------------------------------|----|-------------------------------------------------------------------------------------------------------------------------------------------------------------------------------------------------------------------------------------------------------------------------------------------------------------------------------------------------------------------------------------------------------------------|-------------|-------------|-------------|--------------|----------|-------------|
| UTR5 | CDH2   | 18 | 25757211/2575743<br>8/25757202                                                                                                                                                                                                                                                                                                            | 3  | cg09313439/cg12208<br>258/cg13464915                                                                                                                                                                                                                                                                                                                                                                              | 0.291554003 | 0.338988742 | 0.495758347 | 0.204204344  | 1.28E-05 | 6.72E-05    |
| UTR5 | CDK3   | 17 | 73997417/7399728<br>7                                                                                                                                                                                                                                                                                                                     | 2  | cg10324640/cg15259<br>920                                                                                                                                                                                                                                                                                                                                                                                         | 0.61953952  | 0.50405365  | 0.439915459 | -0.179624061 | 2.77E-08 | 3.12E-07    |
| UTR5 | CDO1   | 5  | 115152386/115152<br>326                                                                                                                                                                                                                                                                                                                   | 2  | cg12880658/cg16265<br>906                                                                                                                                                                                                                                                                                                                                                                                         | 0.259336185 | 0.425709006 | 0.578118532 | 0.318782347  | 1.43E-08 | 1.77E-07    |
| UTR5 | CHAT   | 10 | 50822650/5082217<br>5/50820278/508210<br>93/50818153/50824<br>106/50817213/5082<br>2752/50821518/508<br>20604/50822606/50<br>817804/50818299/5<br>0821161/50818911/<br>50818652/5082165<br>2/50821031/508173<br>06/50820803/50822<br>158/50819500/5081<br>7810/50818707/508<br>21078/50821989/50<br>821597/50822391/5<br>0817651/50821053 | 30 | cg00378730/cg00586<br>644/cg01295399/cg0<br>2336542/cg02728050<br>/cg02949574/cg0610<br>8782/cg06300254/cg<br>06737561/cg0763721<br>3/cg08327532/cg089<br>96579/cg11389172/c<br>g11811216/cg140088<br>83/cg16494192/cg17<br>994569/cg18199666/<br>cg18592174/cg19535<br>607/cg20405893/cg2<br>0457796/cg23987444<br>/cg24109980/cg2515<br>5846/cg25207127/cg<br>25609507/cg2647365<br>1/cg26813646/cg275<br>91375 | 0.305213688 | 0.36475114  | 0.483683885 | 0.178470197  | 1.93E-07 | 1.69E-06    |
| UTR5 | CHODL  | 21 | 19617439                                                                                                                                                                                                                                                                                                                                  | 1  | cg21350575                                                                                                                                                                                                                                                                                                                                                                                                        | 0.49047568  | 0.565352933 | 0.691209159 | 0.200733479  | 2.36E-11 | 1.69E-09    |
| UTR5 | CHST11 | 12 | 104851172                                                                                                                                                                                                                                                                                                                                 | 1  | cg11425280                                                                                                                                                                                                                                                                                                                                                                                                        | 0.139467763 | 0.258243201 | 0.399273716 | 0.259805953  | 3.09E-06 | 1.90E-05    |
| UTR5 | CHST2  | 3  | 142838847/142839<br>578/142838938/142<br>839022/142838682                                                                                                                                                                                                                                                                                 | 5  | cg00995327/cg08774<br>368/cg08858437/cg0<br>9638407/cg17815252                                                                                                                                                                                                                                                                                                                                                    | 0.091566806 | 0.197840252 | 0.359917922 | 0.268351115  | 1.05E-06 | 7.33E-06    |
| UTR5 | CIDEA  | 18 | 12254690/1225436<br>5/12254377                                                                                                                                                                                                                                                                                                            | 3  | cg00590620/cg15063<br>116/cg20950011                                                                                                                                                                                                                                                                                                                                                                              | 0.29549468  | 0.381982467 | 0.449232986 | 0.153738306  | 6.59E-05 | 0.000292852 |
| UTR5 | CIDEC  | 3  | 9920572/9920615/9<br>920535/9920698                                                                                                                                                                                                                                                                                                       | 4  | cg05684195/cg07222<br>243/cg16856722/cg2<br>1562208                                                                                                                                                                                                                                                                                                                                                               | 0.511532463 | 0.413116494 | 0.330206432 | -0.181326032 | 1.95E-11 | 1.56E-09    |
| UTR5 | CLDN10 | 13 | 96085969/9608602<br>3/96204978                                                                                                                                                                                                                                                                                                            | 3  | cg08418978/cg22122<br>715/cg25032595                                                                                                                                                                                                                                                                                                                                                                              | 0.53449756  | 0.578368461 | 0.717565459 | 0.183067899  | 3.35E-06 | 2.04E-05    |
| UTR5 | CLEC4G | 19 | 7797031/7797052                                                                                                                                                                                                                                                                                                                           | 2  | cg16626670/cg19001<br>261                                                                                                                                                                                                                                                                                                                                                                                         | 0.557977435 | 0.466949472 | 0.397688936 | -0.160288499 | 1.98E-10 | 6.12E-09    |

|      |         |    |                                                                                                                                              |    |                                                                                                                                                                            |             |             |             |              |             |             |
|------|---------|----|----------------------------------------------------------------------------------------------------------------------------------------------|----|----------------------------------------------------------------------------------------------------------------------------------------------------------------------------|-------------|-------------|-------------|--------------|-------------|-------------|
| UTR5 | CLEC4M  | 19 | 7828144                                                                                                                                      | 1  | cg21372914                                                                                                                                                                 | 0.669008555 | 0.59473485  | 0.472102182 | -0.196906373 | 7.13E-07    | 5.20E-06    |
| UTR5 | CLIP4   | 2  | 29338636/2933909<br>1/29338432/293440<br>35/29343915/29339<br>076/29339307                                                                   | 7  | cg02774855/cg05038<br>216/cg08808128/cg1<br>5377152/cg19955105<br>/cg21972382/cg2605<br>2635                                                                               | 0.428963233 | 0.487489432 | 0.582906782 | 0.153943549  | 2.39E-08    | 2.74E-07    |
| UTR5 | CLLU1   | 12 | 92818240                                                                                                                                     | 1  | cg13003571                                                                                                                                                                 | 0.857301425 | 0.694630783 | 0.60484675  | -0.252454675 | 1.50E-09    | 2.79E-08    |
| UTR5 | CLPS    | 6  | 35765093                                                                                                                                     | 1  | cg01670608                                                                                                                                                                 | 0.617996745 | 0.516676956 | 0.4087381   | -0.209258645 | 3.20E-10    | 8.86E-09    |
| UTR5 | CLRN1   | 3  | 150690585/150661<br>892                                                                                                                      | 2  | cg17808195/cg26062<br>204                                                                                                                                                  | 0.44536716  | 0.323139761 | 0.221471445 | -0.223895715 | 7.69E-14    | 5.97E-11    |
| UTR5 | CLVS2   | 6  | 123318023/123317<br>714/123317875                                                                                                            | 3  | cg08737743/cg18210<br>226/cg24728018                                                                                                                                       | 0.21959894  | 0.268317521 | 0.382576382 | 0.162977442  | 0.000169222 | 0.000684056 |
| UTR5 | CMTM3   | 16 | 66638320/6663859<br>9/66638702/666384<br>07/66638396/66638<br>438/66638412/6663<br>8293/66638433/666<br>38210                                | 10 | cg00355909/cg03860<br>859/cg06314872/cg0<br>6445928/cg08601917<br>/cg08682544/cg0923<br>3013/cg23297477/cg<br>26560414/cg2665872<br>8                                      | 0.110735955 | 0.28202328  | 0.429371915 | 0.31863596   | 1.64E-08    | 1.98E-07    |
| UTR5 | CNGA3   | 2  | 98963582/9896677<br>9/98963134/989646<br>91/98962900/98964<br>186/98962974/9896<br>3585/98963408/989<br>64436/98986375/98<br>963062/98963768 | 13 | cg02076785/cg08327<br>518/cg10583000/cg1<br>6404530/cg18404308<br>/cg19370054/cg1967<br>1120/cg20581321/cg<br>20727142/cg2148853<br>8/cg22241124/cg247<br>78248/cg25045746 | 0.391719553 | 0.474355693 | 0.617267388 | 0.225547835  | 3.43E-10    | 9.23E-09    |
| UTR5 | CNRIP1  | 2  | 68546899/6854668<br>8/68547088/685471<br>41/68547052/68546<br>579                                                                            | 6  | cg00020052/cg04020<br>079/cg07594636/cg0<br>8157672/cg15313459<br>/cg24171907                                                                                              | 0.228849671 | 0.442461689 | 0.576738373 | 0.347888702  | 1.68E-09    | 3.06E-08    |
| UTR5 | CNTNAP2 | 7  | 145813915/145813<br>946/145813494                                                                                                            | 3  | cg07612562/cg16521<br>917/cg24887139                                                                                                                                       | 0.255507874 | 0.340686325 | 0.489679141 | 0.234171267  | 1.27E-09    | 2.45E-08    |
| UTR5 | CNTNAP4 | 16 | 76311266                                                                                                                                     | 1  | cg26577454                                                                                                                                                                 | 0.127225389 | 0.143523389 | 0.282300908 | 0.15507552   | 0.007209683 | 0.019692498 |
| UTR5 | COL20A1 | 20 | 61924802                                                                                                                                     | 1  | cg15278386                                                                                                                                                                 | 0.77746356  | 0.678887878 | 0.611441955 | -0.166021605 | 3.36E-06    | 2.04E-05    |
| UTR5 | COL23A1 | 5  | 178017376/178017<br>260/178017300                                                                                                            | 3  | cg20546002/cg22960<br>186/cg25552435                                                                                                                                       | 0.102119519 | 0.195361626 | 0.290433439 | 0.18831392   | 0.000642465 | 0.002248355 |
| UTR5 | COL24A1 | 1  | 86622113                                                                                                                                     | 1  | cg12644264                                                                                                                                                                 | 0.141704516 | 0.22757463  | 0.38242285  | 0.240718334  | 4.56E-05    | 0.000210214 |

|      |          |    |                                                                                 |   |                                                                                        |             |             |             |              |             |             |
|------|----------|----|---------------------------------------------------------------------------------|---|----------------------------------------------------------------------------------------|-------------|-------------|-------------|--------------|-------------|-------------|
| UTR5 | COL25A1  | 4  | 110223646/110223713/110223700/110223795/110223429/110223310/110223598/110223252 | 8 | cg02441747/cg06468908/cg10074544/cg1935021/cg19039028/cg23501177/cg25088758/cg26005761 | 0.235074504 | 0.326068794 | 0.47518805  | 0.240113546  | 2.41E-08    | 2.76E-07    |
| UTR5 | COL4A2   | 13 | 110959668/110960198/110959650/110959647/110960186/110960177                     | 6 | cg01956420/cg15871127/cg17541528/cg20327444/cg22757824/cg24089600                      | 0.340165647 | 0.420348213 | 0.536637432 | 0.196471785  | 4.77E-05    | 0.000218421 |
| UTR5 | COL5A1   | 9  | 137533851/137533949                                                             | 2 | cg14252519/cg26024843                                                                  | 0.33844217  | 0.423000736 | 0.548963739 | 0.210521569  | 8.50E-08    | 8.33E-07    |
| UTR5 | CPA4     | 7  | 129933014                                                                       | 1 | cg01796223                                                                             | 0.58549644  | 0.538058156 | 0.374964577 | -0.210531863 | 1.29E-06    | 8.76E-06    |
| UTR5 | CPEB1    | 15 | 83316640/83240550                                                               | 2 | cg04184836/cg06263843                                                                  | 0.148901132 | 0.251138156 | 0.324252168 | 0.175351036  | 7.43E-07    | 5.40E-06    |
| UTR5 | CPLX1    | 4  | 819151/819927/819227                                                            | 3 | cg11219917/cg11286023/cg12598635                                                       | 0.181021881 | 0.240983096 | 0.343469158 | 0.162447276  | 1.33E-06    | 9.00E-06    |
| UTR5 | CPN1     | 10 | 101841416/101841526                                                             | 2 | cg06024295/cg16409039                                                                  | 0.478950655 | 0.402232547 | 0.324959941 | -0.153990714 | 1.15E-08    | 1.47E-07    |
| UTR5 | CPNE8    | 12 | 39299364                                                                        | 1 | cg01963134                                                                             | 0.257536033 | 0.263024829 | 0.455733981 | 0.198197949  | 0.003417397 | 0.010114626 |
| UTR5 | CPXM1    | 20 | 2781262/2781241                                                                 | 2 | cg07113642/cg22304612                                                                  | 0.308282015 | 0.313874517 | 0.484651884 | 0.176369869  | 0.001250049 | 0.004091849 |
| UTR5 | CR1      | 1  | 207669576/207669544                                                             | 2 | cg05825950/cg18147366                                                                  | 0.083524104 | 0.161724098 | 0.2775816   | 0.194057496  | 2.55E-06    | 1.60E-05    |
| UTR5 | CR1L     | 1  | 207818493                                                                       | 1 | cg24557058                                                                             | 0.25046316  | 0.380392383 | 0.543904982 | 0.293441822  | 1.09E-07    | 1.03E-06    |
| UTR5 | CRH      | 8  | 67089831/67090581/67090250/67089887                                             | 4 | cg00603617/cg17305181/cg20329958/cg21878188                                            | 0.249373672 | 0.346949164 | 0.421601668 | 0.172227996  | 4.10E-07    | 3.24E-06    |
| UTR5 | CRISP1   | 6  | 49833706/49833873/49826783                                                      | 3 | cg04201526/cg10632722/cg16023304                                                       | 0.711031133 | 0.617335211 | 0.50707143  | -0.203959703 | 4.12E-10    | 1.05E-08    |
| UTR5 | CRISP3   | 6  | 49706534/49705127/49705602                                                      | 3 | cg09375907/cg24747763/cg27136847                                                       | 0.679797375 | 0.601978243 | 0.527467833 | -0.152329542 | 1.27E-08    | 1.60E-07    |
| UTR5 | CRISPLD1 | 8  | 75896975/75897115/75897310/75897297                                             | 4 | cg01410472/cg02942845/cg05624932/cg13534450                                            | 0.29672969  | 0.373407267 | 0.516262164 | 0.219532474  | 5.66E-09    | 8.26E-08    |
| UTR5 | CRMP1    | 4  | 5890289                                                                         | 1 | cg06256858                                                                             | 0.22577877  | 0.292910678 | 0.384815409 | 0.159036639  | 0.000164362 | 0.000666149 |
| UTR5 | CRYGD    | 2  | 208989209/208989248                                                             | 2 | cg17916432/cg22399133                                                                  | 0.566959963 | 0.630215325 | 0.747540161 | 0.180580199  | 1.86E-08    | 2.20E-07    |
| UTR5 | CSMD1    | 8  | 4852036                                                                         | 1 | cg12258042                                                                             | 0.56875419  | 0.654968889 | 0.762469864 | 0.193715674  | 1.56E-09    | 2.88E-08    |
| UTR5 | CTNNA3   | 10 | 69424581/69419453/69425930/69455804/69426778                                    | 5 | cg05668351/cg05766921/cg12768447/cg19996026/cg26297493                                 | 0.682086848 | 0.606561544 | 0.511104958 | -0.17098189  | 3.80E-12    | 5.48E-10    |

|      |         |    |                                                                                       |   |                                                                                              |             |             |             |              |             |             |
|------|---------|----|---------------------------------------------------------------------------------------|---|----------------------------------------------------------------------------------------------|-------------|-------------|-------------|--------------|-------------|-------------|
| UTR5 | CUX2    | 12 | 111471963                                                                             | 1 | cg09229912                                                                                   | 0.293054925 | 0.402388711 | 0.519260705 | 0.22620578   | 2.99E-08    | 3.34E-07    |
|      |         |    | 219030006/219030<br>123/219030898/219                                                 |   | cg00832199/cg13048<br>967/cg13519373/cg1                                                     |             |             |             |              |             |             |
| UTR5 | CXCR1   | 2  | 030752/219030830/<br>219031519/219031<br>640                                          | 7 | 5768138/cg15908708<br>/cg18467756/cg2002<br>5658                                             | 0.597961272 | 0.494546808 | 0.412102536 | -0.185858736 | 4.95E-11    | 2.52E-09    |
|      |         |    | 38303138/3830258<br>7/38302674/383031<br>45/38302892/38303<br>219                     | 6 | cg07078841/cg11751<br>707/cg16439198/cg1<br>8451022/cg23151000<br>/cg25856383                | 0.199766348 | 0.279891665 | 0.419449856 | 0.219683507  | 9.82E-07    | 6.91E-06    |
| UTR5 | CYP2C18 | 10 | 96443383                                                                              | 1 | cg14196507                                                                                   | 0.65630379  | 0.492147161 | 0.376205891 | -0.280097899 | 5.45E-11    | 2.67E-09    |
| UTR5 | CYYR1   | 21 | 27945413                                                                              | 1 | cg19678828                                                                                   | 0.535953395 | 0.613151833 | 0.695989627 | 0.160036232  | 1.28E-10    | 4.43E-09    |
| UTR5 | DAO     | 12 | 109273999/109274<br>241                                                               | 2 | cg12592321/cg22801<br>690                                                                    | 0.561895295 | 0.470840789 | 0.365507909 | -0.196387386 | 4.90E-10    | 1.18E-08    |
| UTR5 | DCC     | 18 | 49867117/4986654<br>8/49867126                                                        | 3 | cg06261937/cg21669<br>679/cg25266232                                                         | 0.332915208 | 0.41640653  | 0.524336224 | 0.191421016  | 5.94E-07    | 4.44E-06    |
| UTR5 | DCT     | 13 | 95131809                                                                              | 1 | cg05807291                                                                                   | 0.63958114  | 0.60577005  | 0.481196077 | -0.158385063 | 3.11E-05    | 0.000148962 |
|      |         |    | 101111261/101111<br>314/101111147/101<br>111427                                       | 4 | cg12829717/cg18603<br>154/cg18714412/cg2<br>7062369                                          | 0.150814596 | 0.191819361 | 0.359491989 | 0.208677393  | 0.000239496 | 0.000934337 |
| UTR5 | DDX25   | 11 | 125774406/125774<br>311                                                               | 2 | cg19792599/cg22097<br>425                                                                    | 0.42813761  | 0.496372142 | 0.590836425 | 0.162698815  | 6.87E-10    | 1.52E-08    |
|      |         |    | 186078568/186080<br>015/186075879/186<br>078847/186079142/<br>186078640/186079<br>367 | 7 | cg00404400/cg05287<br>817/cg07138366/cg1<br>0730421/cg15055817<br>/cg15548101/cg1665<br>7397 | 0.351788577 | 0.421841382 | 0.522981659 | 0.171193082  | 2.57E-08    | 2.93E-07    |
| UTR5 | DKK2    | 4  | 107957265/107957<br>362/107956955/107<br>957430/107957072                             | 5 | cg01471384/cg01962<br>428/cg08341316/cg1<br>3139972/cg26955835                               | 0.182295618 | 0.342343733 | 0.467727194 | 0.285431576  | 2.41E-08    | 2.76E-07    |
| UTR5 | DLEU7   | 13 | 51417846                                                                              | 1 | cg20170533                                                                                   | 0.44724189  | 0.564400672 | 0.69818495  | 0.25094306   | 5.19E-11    | 2.59E-09    |
| UTR5 | DLK1    | 14 | 101193397                                                                             | 1 | cg02874376                                                                                   | 0.4214206   | 0.485681622 | 0.585657955 | 0.164237355  | 1.88E-06    | 1.22E-05    |
| UTR5 | DNAH11  | 7  | 21582834                                                                              | 1 | cg05285902                                                                                   | 0.182962681 | 0.209432983 | 0.381891586 | 0.198928906  | 0.000344154 | 0.00128718  |
| UTR5 | DNAH9   | 17 | 11786412/1178801<br>6                                                                 | 2 | cg12626882/cg14135<br>174                                                                    | 0.500866753 | 0.436152728 | 0.339406835 | -0.161459918 | 2.09E-09    | 3.63E-08    |
|      |         |    | 78556512/7855653<br>4/78557094/785565<br>02                                           | 4 | cg08594606/cg09214<br>398/cg13747794/cg2<br>3366752                                          | 0.6657829   | 0.575533097 | 0.497727018 | -0.168055882 | 2.43E-10    | 7.23E-09    |
| UTR5 | DNAJA4  | 15 | 66955031/6694618<br>8                                                                 | 2 | cg09312407/cg17373<br>345                                                                    | 0.416816328 | 0.325444219 | 0.262663945 | -0.154152382 | 1.28E-10    | 4.43E-09    |
| UTR5 | DNASE2B | 1  | 84876625                                                                              | 1 | cg24868292                                                                                   | 0.522377195 | 0.38675595  | 0.301916732 | -0.220460463 | 8.45E-13    | 2.38E-10    |

|      |        |    |                                                                       |   |                                                                              |             |             |             |              |             |             |
|------|--------|----|-----------------------------------------------------------------------|---|------------------------------------------------------------------------------|-------------|-------------|-------------|--------------|-------------|-------------|
| UTR5 | DNM3   | 1  | 171810778                                                             | 1 | cg06211893                                                                   | 0.092526396 | 0.164498276 | 0.24640649  | 0.153880094  | 0.011113431 | 0.028801593 |
| UTR5 | DNMT3L | 21 | 45681834                                                              | 1 | cg15635600                                                                   | 0.53082813  | 0.4463379   | 0.377105464 | -0.153722666 | 1.90E-09    | 3.33E-08    |
| UTR5 | DOK5   | 20 | 53092474/53092334                                                     | 2 | cg00055557/cg20107395                                                        | 0.245197855 | 0.316964298 | 0.471235526 | 0.226037671  | 6.40E-06    | 3.61E-05    |
| UTR5 | DOK6   | 18 | 67068457                                                              | 1 | cg15916399                                                                   | 0.281403135 | 0.369422233 | 0.461386509 | 0.179983374  | 3.06E-12    | 4.87E-10    |
| UTR5 | DPP6   | 7  | 153584582/154002372/153584597/153584748/153584609                     | 5 | cg06495961/cg13544851/cg14523847/cg4011260/cg27032232                        | 0.464160719 | 0.551574422 | 0.688293491 | 0.224132772  | 3.32E-10    | 9.10E-09    |
| UTR5 | DQX1   | 2  | 74753358/74753281/74753334/74753312                                   | 4 | cg01410453/cg02034222/cg06151718/cg24544105                                  | 0.643364703 | 0.502117763 | 0.42691287  | -0.216451834 | 1.56E-09    | 2.88E-08    |
| UTR5 | DSPP   | 4  | 88530371                                                              | 1 | cg09590733                                                                   | 0.63317119  | 0.475644672 | 0.391535282 | -0.241635908 | 2.66E-08    | 3.03E-07    |
| UTR5 | DTX3   | 12 | 57998762/57998786/57998656                                            | 3 | cg11654179/cg17730484/cg19217692                                             | 0.092657477 | 0.100876562 | 0.279461681 | 0.186804204  | 0.001536626 | 0.00491451  |
| UTR5 | DYDC2  | 10 | 82119370/82116571/82117089/82119561/82117119/82116596/82117257        | 7 | cg00649199/cg01527459/cg03701427/cg05905523/cg06411551/cg12640394/cg17703212 | 0.45025132  | 0.565637193 | 0.67035718  | 0.22010586   | 5.01E-07    | 3.83E-06    |
| UTR5 | EBF1   | 5  | 158526693/158526614/158526642                                         | 3 | cg04217450/cg05530568/cg17009297                                             | 0.283888828 | 0.337726565 | 0.504129801 | 0.220240973  | 3.94E-06    | 2.34E-05    |
| UTR5 | ECEL1  | 2  | 233351921/233352148/233351564/233351609/233351525/233351735           | 6 | cg01228134/cg04593426/cg07503630/cg09736968/cg19047707/cg27023555            | 0.340520554 | 0.387458512 | 0.499138452 | 0.158617898  | 3.14E-05    | 0.000150396 |
| UTR5 | EDNRA  | 4  | 148402748/148402408/148402899/148402128/148402399/148405579/148402574 | 7 | cg03580568/cg04045079/cg05102394/cg12009023/cg20557687/cg23865342/cg24789447 | 0.415082923 | 0.487928112 | 0.590800429 | 0.175717506  | 1.23E-06    | 8.43E-06    |



|      |        |    |                                                                                                                                                                                                                                                                                                                                                                                                                                                                                                                                                     |                                                                                                                                                                                                                                                                                                                                                                                                                                                                                                                                                                                                                                                                     |             |             |             |             |          |             |
|------|--------|----|-----------------------------------------------------------------------------------------------------------------------------------------------------------------------------------------------------------------------------------------------------------------------------------------------------------------------------------------------------------------------------------------------------------------------------------------------------------------------------------------------------------------------------------------------------|---------------------------------------------------------------------------------------------------------------------------------------------------------------------------------------------------------------------------------------------------------------------------------------------------------------------------------------------------------------------------------------------------------------------------------------------------------------------------------------------------------------------------------------------------------------------------------------------------------------------------------------------------------------------|-------------|-------------|-------------|-------------|----------|-------------|
| UTR5 | EDNRB  | 13 | 78493182/7849365<br>7/78493100/784935<br>61/78493012/78493<br>066/78493704/7849<br>4064/78493878/784<br>94330/78549582/78<br>493651/78494010/7<br>8493313/78494272/<br>78494442/7849329<br>4/78493349/784935<br>90/78493920/78493<br>305/78493126/7849<br>3128/78495961/784<br>92922/78493854/78<br>549657/78493229/7<br>8493712/78494171/<br>78493297/7849336<br>5/78494067/784932<br>03/78493874/78493<br>564/78493232/7849<br>3666/78492916/784<br>93671/78493215/78<br>493205/78493282/7<br>8493958/78494462/<br>78493631/7849358<br>3/78492730 | cg01910869/cg02147<br>695/cg04390523/cg0<br>6057566/cg06179060<br>/cg06971129/cg0703<br>5515/cg07974719/cg<br>08321129/cg0863404<br>1/cg08983760/cg091<br>52886/cg09786383/c<br>g10016380/cg107647<br>62/cg11074192/cg12<br>602112/cg12847373/<br>cg12935136/cg12983<br>394/cg13434989/cg1<br>3818654/cg15836660<br>/cg16203262/cg1657<br>1983/cg16739796/cg<br>18003135/cg1803219<br>0/cg18568990/cg191<br>11971/cg19650157/c<br>g19742055/cg197595<br>02/cg19916212/cg21<br>364111/cg21675115/<br>cg22310279/cg22541<br>679/cg23316360/cg2<br>3494140/cg23702615<br>/cg23766591/cg2423<br>6409/cg24745738/cg<br>24942919/cg2571799<br>4/cg26022015/cg266<br>22320 | 0.366351187 | 0.458914464 | 0.565985089 | 0.199633903 | 4.80E-10 | 1.17E-08    |
| UTR5 | EFCAB1 | 8  | 49647734/4964780<br>9/49647717/496478 4<br>33                                                                                                                                                                                                                                                                                                                                                                                                                                                                                                       | cg08258526/cg11469<br>098/cg22836229/cg2<br>3562261                                                                                                                                                                                                                                                                                                                                                                                                                                                                                                                                                                                                                 | 0.371245304 | 0.41917724  | 0.54160763  | 0.170362326 | 2.10E-05 | 0.000104676 |
| UTR5 | EFEMP1 | 2  | 56150341/5615047<br>8/56150925/561504<br>75/56150255/56150 8<br>675/56150549/5614<br>9825                                                                                                                                                                                                                                                                                                                                                                                                                                                           | cg03122624/cg05385<br>513/cg08130988/cg1<br>6100120/cg20786074<br>/cg24719005/cg2504<br>6074/cg25711779                                                                                                                                                                                                                                                                                                                                                                                                                                                                                                                                                             | 0.317840707 | 0.370426108 | 0.494984797 | 0.17714409  | 5.95E-07 | 4.44E-06    |

|      |        |    |                                                                                                                                                                                       |    |                                                                                                                                                                                                          |             |             |             |              |             |             |
|------|--------|----|---------------------------------------------------------------------------------------------------------------------------------------------------------------------------------------|----|----------------------------------------------------------------------------------------------------------------------------------------------------------------------------------------------------------|-------------|-------------|-------------|--------------|-------------|-------------|
| UTR5 | EHD3   | 2  | 31457287/3145706<br>1/31456966/314570<br>58/31456964/31457<br>043                                                                                                                     | 6  | cg01163837/cg13795<br>465/cg15355118/cg2<br>4743639/cg25428398<br>/cg25840208                                                                                                                            | 0.113760179 | 0.296217255 | 0.397088917 | 0.283328738  | 1.09E-06    | 7.60E-06    |
| UTR5 | EHF    | 11 | 34642885/3465423<br>3                                                                                                                                                                 | 2  | cg18414381/cg18560<br>551                                                                                                                                                                                | 0.45383171  | 0.351679986 | 0.27473027  | -0.17910144  | 9.82E-12    | 9.95E-10    |
| UTR5 | ELF3   | 1  | 201979938/201979<br>846/201979764                                                                                                                                                     | 3  | cg02076020/cg07897<br>871/cg26328757                                                                                                                                                                     | 0.58622302  | 0.48765833  | 0.401774527 | -0.184448493 | 1.19E-10    | 4.18E-09    |
| UTR5 | ELOVL2 | 6  | 11044558/1104454<br>1                                                                                                                                                                 | 2  | cg05446010/cg22143<br>569                                                                                                                                                                                | 0.028742374 | 0.092247237 | 0.198802878 | 0.170060504  | 7.53E-05    | 0.000329781 |
| UTR5 | EMB    | 5  | 49737178/4973718<br>2/49736988                                                                                                                                                        | 3  | cg03179043/cg08722<br>065/cg18110165                                                                                                                                                                     | 0.230660551 | 0.447511756 | 0.520510282 | 0.289849731  | 2.05E-12    | 3.76E-10    |
| UTR5 | ENPP6  | 4  | 185139078                                                                                                                                                                             | 1  | cg08493463                                                                                                                                                                                               | 0.55805469  | 0.491997322 | 0.384458145 | -0.173596545 | 1.94E-11    | 1.56E-09    |
| UTR5 | EPHA10 | 1  | 38230769/3823077<br>9                                                                                                                                                                 | 2  | cg12128017/cg20510<br>207                                                                                                                                                                                | 0.302970382 | 0.384643194 | 0.540645805 | 0.237675423  | 1.60E-06    | 1.06E-05    |
| UTR5 | EPHA5  | 4  | 66535575                                                                                                                                                                              | 1  | cg02463418                                                                                                                                                                                               | 0.40428126  | 0.519426406 | 0.618419409 | 0.214138149  | 5.02E-05    | 0.000228442 |
| UTR5 | EPS8L3 | 1  | 110306507/110305<br>591                                                                                                                                                               | 2  | cg00515905/cg23957<br>643                                                                                                                                                                                | 0.531275918 | 0.421435061 | 0.3361768   | -0.195099118 | 1.09E-11    | 1.07E-09    |
| UTR5 | EPYC   | 12 | 91396741                                                                                                                                                                              | 1  | cg13548607                                                                                                                                                                                               | 0.853448815 | 0.784587617 | 0.691189509 | -0.162259306 | 0.000546175 | 0.001942058 |
| UTR5 | EVC    | 4  | 5713100/5712937/5<br>713005                                                                                                                                                           | 3  | cg16418810/cg17460<br>447/cg21210758                                                                                                                                                                     | 0.246805393 | 0.344737494 | 0.514194583 | 0.26738919   | 1.46E-09    | 2.72E-08    |
| UTR5 | EVC2   | 4  | 5708474/5710411/5<br>710767/5710407/57<br>09858/5710403/570<br>6354/5710319/5710<br>761/5710372/57100<br>16/5710098/571033<br>7                                                       | 13 | cg01290904/cg01834<br>022/cg03278643/cg0<br>5542338/cg05571820<br>/cg06426416/cg0742<br>1005/cg14654886/cg<br>17242664/cg1725545<br>0/cg22290744/cg236<br>65381/cg27434509                               | 0.446532783 | 0.50251781  | 0.602783279 | 0.156250495  | 3.06E-06    | 1.88E-05    |
| UTR5 | EYA4   | 6  | 133563342/133563<br>764/133564066/133<br>564466/133564546/<br>133562494/133563<br>868/133584189/133<br>563382/133564578/<br>133576214/133563<br>532/133562776/133<br>563779/133562774 | 15 | cg01401376/cg01805<br>282/cg06393563/cg0<br>6764333/cg08917489<br>/cg14270292/cg1481<br>7541/cg15246805/cg<br>17722675/cg1871422<br>4/cg20422212/cg216<br>07030/cg24176563/c<br>g24675448/cg266561<br>35 | 0.27335734  | 0.319411567 | 0.427561952 | 0.154204613  | 7.20E-06    | 4.01E-05    |
| UTR5 | FADS2  | 11 | 61595807                                                                                                                                                                              | 1  | cg25303599                                                                                                                                                                                               | 0.0880115   | 0.159008576 | 0.40492206  | 0.31691056   | 1.27E-05    | 6.67E-05    |
| UTR5 | FAIM2  | 12 | 50297588/5029758<br>1                                                                                                                                                                 | 2  | cg16115588/cg27188<br>703                                                                                                                                                                                | 0.355989765 | 0.464132031 | 0.593607943 | 0.237618178  | 2.37E-07    | 2.01E-06    |

|      |         |    |                                                                                                                         |    |                                                                                                                                     |             |             |             |              |          |            |
|------|---------|----|-------------------------------------------------------------------------------------------------------------------------|----|-------------------------------------------------------------------------------------------------------------------------------------|-------------|-------------|-------------|--------------|----------|------------|
| UTR5 | FAM102A | 9  | 130712990                                                                                                               | 1  | cg14080888                                                                                                                          | 0.56706459  | 0.456293178 | 0.4012331   | -0.16583149  | 6.72E-10 | 1.50E-08   |
| UTR5 | FAM115A | 7  | 143579698/143580147/143582146/143579951/143579665/143582308/143582630/143584683/143582499/143598702/143596849/143599078 | 12 | cg01030534/cg02245020/cg02266399/cg03225210/cg03514404/cg09671837/cg09846875/cg11067338/cg16807089/cg19548738/cg22280402/cg26309303 | 0.366802654 | 0.4564707   | 0.546040056 | 0.179237401  | 6.39E-11 | 2.95E-09   |
| UTR5 | FAM123A | 13 | 25745768/25745784                                                                                                       | 2  | cg14880499/cg22029275                                                                                                               | 0.23601127  | 0.382200712 | 0.570263075 | 0.334251805  | 4.43E-10 | 1.10E-08   |
| UTR5 | FAM124B | 2  | 225266656/225266580                                                                                                     | 2  | cg00698413/cg18890556                                                                                                               | 0.50715081  | 0.594005306 | 0.689245982 | 0.182095172  | 2.90E-09 | 4.71E-08   |
| UTR5 | FAM153A | 5  | 177196865                                                                                                               | 1  | cg06965744                                                                                                                          | 0.734184735 | 0.624720967 | 0.507362886 | -0.226821849 | 1.15E-09 | 2.28E-08   |
| UTR5 | FAM155A | 13 | 108519213/108518955/108519318                                                                                           | 3  | cg04607400/cg05383490/cg19839798                                                                                                    | 0.331693743 | 0.384843347 | 0.596236664 | 0.264542921  | 5.17E-08 | 5.37E-07   |
| UTR5 | FAM159B | 5  | 63986392                                                                                                                | 1  | cg10981909                                                                                                                          | 0.354039175 | 0.485957006 | 0.671355627 | 0.317316452  | 8.47E-10 | 1.81E-08   |
| UTR5 | FAM162B | 6  | 117086850                                                                                                               | 1  | cg07641160                                                                                                                          | 0.204753153 | 0.284185165 | 0.499210776 | 0.294457623  | 1.50E-06 | 1.00E-05   |
| UTR5 | FAM183A | 1  | 43613606                                                                                                                | 1  | cg20991612                                                                                                                          | 0.26131836  | 0.304062056 | 0.435364445 | 0.174046085  | 1.45E-06 | 9.69E-06   |
| UTR5 | FAM196B | 5  | 169407472/169404742/169331882/169350021/169333109/169407439/169398708/169322052/169373347/169390597/169361351           | 11 | cg00357551/cg00547068/cg03850213/cg09011473/cg09143964/cg12688234/cg14781262/cg15102430/cg22809017/cg23230904/cg27068707            | 0.695606819 | 0.605029072 | 0.520006523 | -0.175600295 | 1.58E-09 | 2.90E-08   |
| UTR5 | FAM26F  | 6  | 116783000                                                                                                               | 1  | cg15172529                                                                                                                          | 0.299070495 | 0.388476994 | 0.495076323 | 0.196005828  | 8.96E-05 | 0.00038672 |
| UTR5 | FAM43B  | 1  | 20879029/20879286/20879296                                                                                              | 3  | cg03754311/cg05771261/cg20404387                                                                                                    | 0.292133723 | 0.381013617 | 0.551905216 | 0.259771493  | 4.42E-08 | 4.70E-07   |
| UTR5 | FAM55D  | 11 | 114453402/114466093                                                                                                     | 2  | cg18384712/cg21833776                                                                                                               | 0.483290695 | 0.364575761 | 0.295816255 | -0.18747444  | 4.74E-10 | 1.16E-08   |
| UTR5 | FAM71C  | 12 | 100041844/100041683                                                                                                     | 2  | cg10635722/cg23170057                                                                                                               | 0.669029785 | 0.575467478 | 0.502464909 | -0.166564876 | 1.22E-07 | 1.13E-06   |
| UTR5 | FAM72B  | 1  | 120839380/120839385/120839390                                                                                           | 3  | cg00198436/cg07236150/cg09169215                                                                                                    | 0.066481005 | 0.145489607 | 0.294410058 | 0.227929053  | 5.58E-07 | 4.20E-06   |
| UTR5 | FBN1    | 15 | 48937856/48937213/48937319/48937958                                                                                     | 4  | cg03535663/cg04125371/cg12975862/cg19908534                                                                                         | 0.144832838 | 0.280812161 | 0.438539708 | 0.293706871  | 5.15E-07 | 3.92E-06   |
| UTR5 | FBN2    | 5  | 127873397/127873552/127873711                                                                                           | 3  | cg12940822/cg17958315/cg25084878                                                                                                    | 0.205810473 | 0.311272031 | 0.51417982  | 0.308369348  | 5.35E-07 | 4.05E-06   |

|      |          |    |                                                                                                               |    |                                                                                                                          |             |             |             |              |             |             |
|------|----------|----|---------------------------------------------------------------------------------------------------------------|----|--------------------------------------------------------------------------------------------------------------------------|-------------|-------------|-------------|--------------|-------------|-------------|
| UTR5 | FBXL7    | 5  | 15500714                                                                                                      | 1  | cg06577205                                                                                                               | 0.344421575 | 0.375808717 | 0.528633736 | 0.184212161  | 0.000116015 | 0.000488555 |
| UTR5 | FBXO39   | 17 | 6679564/6679597/6679781                                                                                       | 3  | cg02374745/cg20723355/cg21985295                                                                                         | 0.475388303 | 0.55881715  | 0.706998377 | 0.231610075  | 4.87E-10    | 1.18E-08    |
| UTR5 | FCRL3    | 1  | 157670328                                                                                                     | 1  | cg17134153                                                                                                               | 0.557148105 | 0.464769817 | 0.338287986 | -0.218860119 | 1.30E-07    | 1.20E-06    |
| UTR5 | FEZF2    | 3  | 62358825/62358610/62358980                                                                                    | 3  | cg14651453/cg18902742/cg19629292                                                                                         | 0.233843444 | 0.299242695 | 0.412969885 | 0.179126441  | 3.96E-05    | 0.00018541  |
| UTR5 | FGD5     | 3  | 14860482                                                                                                      | 1  | cg04943612                                                                                                               | 0.79655157  | 0.702215333 | 0.617282536 | -0.179269034 | 8.04E-08    | 7.95E-07    |
| UTR5 | FGF12    | 3  | 192126244/192445380/192126165/192126584/192444985/192445040/192445202/192126825/192126023/192445307/192126742 | 11 | cg00386551/cg02992632/cg04003850/cg04350913/cg04988476/cg07127762/cg15543551/cg16209795/cg18780257/cg19507527/cg21197774 | 0.226401814 | 0.310071935 | 0.455091224 | 0.22868941   | 3.10E-08    | 3.44E-07    |
| UTR5 | FGF3     | 11 | 69633716/69633959                                                                                             | 2  | cg15020425/cg17277529                                                                                                    | 0.226332898 | 0.26778208  | 0.377243639 | 0.150910741  | 5.81E-05    | 0.000260856 |
| UTR5 | FGF4     | 11 | 69590090/69590113                                                                                             | 2  | cg19831575/cg23964057                                                                                                    | 0.151178155 | 0.239285329 | 0.42840766  | 0.277229506  | 7.18E-07    | 5.24E-06    |
| UTR5 | FGF5     | 4  | 81187798/81187906                                                                                             | 2  | cg02002231/cg14197923                                                                                                    | 0.106380913 | 0.196157855 | 0.391203448 | 0.284822535  | 2.36E-05    | 0.000115707 |
| UTR5 | FGFBP1   | 4  | 15939889/15939862                                                                                             | 2  | cg09565002/cg13929970                                                                                                    | 0.54022117  | 0.435373733 | 0.351539527 | -0.188681643 | 1.67E-10    | 5.40E-09    |
| UTR5 | FHL5     | 6  | 97010903/97010439                                                                                             | 2  | cg03043157/cg23978322                                                                                                    | 0.533942893 | 0.4290563   | 0.364579459 | -0.169363433 | 7.48E-09    | 1.02E-07    |
| UTR5 | FIBIN    | 11 | 27015991/27015872/27015656/27015808/27015813                                                                  | 5  | cg01649773/cg04622802/cg07042914/cg07777008/cg15621260                                                                   | 0.483024114 | 0.554100422 | 0.667452933 | 0.184428819  | 4.00E-09    | 6.21E-08    |
| UTR5 | FLG2     | 1  | 152331529                                                                                                     | 1  | cg20694572                                                                                                               | 0.7220716   | 0.610989517 | 0.441182641 | -0.280888959 | 1.21E-08    | 1.54E-07    |
| UTR5 | FLJ20184 | 4  | 106473806                                                                                                     | 1  | cg27126442                                                                                                               | 0.54336524  | 0.439075839 | 0.345794486 | -0.197570754 | 2.09E-09    | 3.63E-08    |
| UTR5 | FLJ23834 | 7  | 105603743                                                                                                     | 1  | cg02661623                                                                                                               | 0.676365055 | 0.588094428 | 0.513351982 | -0.163013073 | 3.30E-05    | 0.000156784 |
| UTR5 | FNDC1    | 6  | 159590578                                                                                                     | 1  | cg14971597                                                                                                               | 0.174748926 | 0.286958762 | 0.397212366 | 0.222463441  | 1.04E-06    | 7.28E-06    |
| UTR5 | FOLH1    | 11 | 49230168/49230036                                                                                             | 2  | cg14775560/cg25346915                                                                                                    | 0.291977923 | 0.319281246 | 0.501149359 | 0.209171437  | 1.49E-05    | 7.72E-05    |
| UTR5 | FOLH1B   | 11 | 89392829                                                                                                      | 1  | cg02915544                                                                                                               | 0.59441058  | 0.412695106 | 0.265445155 | -0.328965425 | 2.35E-14    | 3.93E-11    |
| UTR5 | FOXD4L1  | 2  | 114256781/114256673                                                                                           | 2  | cg10602757/cg16708281                                                                                                    | 0.30246558  | 0.351444594 | 0.485350636 | 0.182885056  | 7.30E-07    | 5.31E-06    |
| UTR5 | FOXE1    | 9  | 100615796                                                                                                     | 1  | cg19292008                                                                                                               | 0.15018847  | 0.258647846 | 0.361871411 | 0.211682941  | 1.63E-05    | 8.34E-05    |
| UTR5 | FOXG1    | 14 | 29236323/29236476                                                                                             | 2  | cg10300684/cg10828337                                                                                                    | 0.355856943 | 0.45415355  | 0.627157636 | 0.271300694  | 1.32E-09    | 2.51E-08    |
| UTR5 | FOXI1    | 5  | 169532943                                                                                                     | 1  | cg16137007                                                                                                               | 0.638671515 | 0.549498461 | 0.479292482 | -0.159379033 | 4.34E-10    | 1.09E-08    |
| UTR5 | FOXL1    | 16 | 86612312                                                                                                      | 1  | cg00584450                                                                                                               | 0.517955895 | 0.582548389 | 0.693978082 | 0.176022187  | 3.16E-11    | 1.96E-09    |

|      |         |    |                                                                                                                                                                                 |    |                                                                                                                                                                                                                     |             |             |             |              |             |             |
|------|---------|----|---------------------------------------------------------------------------------------------------------------------------------------------------------------------------------|----|---------------------------------------------------------------------------------------------------------------------------------------------------------------------------------------------------------------------|-------------|-------------|-------------|--------------|-------------|-------------|
| UTR5 | FOXN4   | 12 | 109747000                                                                                                                                                                       | 1  | cg22326903                                                                                                                                                                                                          | 0.068558682 | 0.145944608 | 0.267626035 | 0.199067353  | 0.000908907 | 0.003078323 |
| UTR5 | FPR1    | 19 | 52254222/5225337<br>3                                                                                                                                                           | 2  | cg15811427/cg22152<br>605                                                                                                                                                                                           | 0.613606575 | 0.508523403 | 0.405170659 | -0.208435916 | 2.71E-08    | 3.07E-07    |
| UTR5 | FPR2    | 19 | 52265748/5226881<br>4/52266295/522666<br>42/52266482                                                                                                                            | 5  | cg03195665/cg04554<br>195/cg12306057/cg1<br>4203721/cg16726204                                                                                                                                                      | 0.592783775 | 0.494880604 | 0.417787033 | -0.174996742 | 1.57E-09    | 2.90E-08    |
| UTR5 | FRK     | 6  | 116381609/116381<br>904                                                                                                                                                         | 2  | cg16176600/cg26893<br>134                                                                                                                                                                                           | 0.429479963 | 0.340561322 | 0.272251695 | -0.157228267 | 8.52E-12    | 9.11E-10    |
| UTR5 | FSCN3   | 7  | 127233742                                                                                                                                                                       | 1  | cg16725721                                                                                                                                                                                                          | 0.80322332  | 0.700517317 | 0.613380168 | -0.189843152 | 4.00E-07    | 3.17E-06    |
| UTR5 | FSTL1   | 3  | 120169783/120169<br>821                                                                                                                                                         | 2  | cg03424342/cg15109<br>851                                                                                                                                                                                           | 0.275980793 | 0.326929212 | 0.451583101 | 0.175602309  | 0.000543829 | 0.001934274 |
| UTR5 | FUT3    | 19 | 5846599/5851255/5<br>846552/5846586/58<br>51465                                                                                                                                 | 5  | cg14529758/cg17471<br>102/cg19263069/cg1<br>9442149/cg26899156                                                                                                                                                      | 0.552526154 | 0.425135961 | 0.364135888 | -0.188390266 | 2.45E-07    | 2.07E-06    |
| UTR5 | FXD3    | 19 | 35606877/3560673<br>2/35607180/356072<br>21                                                                                                                                     | 4  | cg00480115/cg02633<br>817/cg02704949/cg2<br>1304163                                                                                                                                                                 | 0.51582892  | 0.421460122 | 0.329591473 | -0.186237447 | 2.35E-11    | 1.69E-09    |
| UTR5 | FZD10   | 12 | 130647213/130647<br>289                                                                                                                                                         | 2  | cg15928093/cg27232<br>145                                                                                                                                                                                           | 0.358142533 | 0.401554761 | 0.524662725 | 0.166520193  | 3.32E-09    | 5.28E-08    |
| UTR5 | GABRA5  | 15 | 27113913/2711191<br>1/27111949/271129<br>02/27112197/27111<br>940/27112430/2711<br>3511/27113322/271<br>12119/27113459/27<br>111993/27111884/2<br>7112287/27112305/<br>27112049 | 16 | cg00329728/cg01378<br>667/cg03325535/cg0<br>3462380/cg05044185<br>/cg10318222/cg1065<br>2393/cg11786657/cg<br>14508508/cg1566564<br>6/cg17481117/cg182<br>55240/cg20005743/c<br>g21276413/cg214029<br>21/cg22523852 | 0.378295317 | 0.453643683 | 0.563795061 | 0.185499744  | 3.59E-11    | 2.05E-09    |
| UTR5 | GABRA6  | 5  | 161112787                                                                                                                                                                       | 1  | cg22672790                                                                                                                                                                                                          | 0.391572255 | 0.294535011 | 0.191274473 | -0.200297782 | 4.56E-11    | 2.39E-09    |
| UTR5 | GABRB3  | 15 | 27018874                                                                                                                                                                        | 1  | cg01690182                                                                                                                                                                                                          | 0.349999235 | 0.444493578 | 0.569842055 | 0.21984282   | 1.05E-08    | 1.37E-07    |
| UTR5 | GAD2    | 10 | 26505442/2650550<br>3/26505440/265052<br>45                                                                                                                                     | 4  | cg04599297/cg09056<br>181/cg11328303/cg1<br>5850954                                                                                                                                                                 | 0.277074423 | 0.44180043  | 0.613517622 | 0.336443198  | 2.92E-10    | 8.28E-09    |
| UTR5 | GAL3ST3 | 11 | 65816027/6581379<br>0/65816521/658166<br>46/65816642/65816<br>463                                                                                                               | 6  | cg02839195/cg11287<br>219/cg14780632/cg1<br>5916004/cg21238818<br>/cg24960947                                                                                                                                       | 0.536715678 | 0.627212439 | 0.711567258 | 0.17485158   | 5.05E-10    | 1.20E-08    |

|      |         |    |                                                                                                               |    |                                                                                                                          |             |             |             |              |             |             |
|------|---------|----|---------------------------------------------------------------------------------------------------------------|----|--------------------------------------------------------------------------------------------------------------------------|-------------|-------------|-------------|--------------|-------------|-------------|
| UTR5 | GALNT13 | 2  | 154729200/154728735/154728468/154729059/154729917/154729995/154729622/154730326/154730157/154729189/154729763 | 11 | cg01011748/cg10033761/cg12079322/cg13101087/cg14630357/cg17130964/cg18118685/cg23762263/cg24412079/cg25703346/cg26660002 | 0.32878657  | 0.345853486 | 0.537751066 | 0.208964496  | 3.16E-08    | 3.50E-07    |
| UTR5 | GALNT14 | 2  | 31361104/31361371                                                                                             | 2  | cg05714219/cg24597158                                                                                                    | 0.05724639  | 0.146009878 | 0.298807256 | 0.241560866  | 8.02E-05    | 0.000349575 |
| UTR5 | GALNTL5 | 7  | 151664041/151653523/151664190/151664071/151653890                                                             | 5  | cg01760103/cg11727304/cg13835670/cg1565299/cg25310567                                                                    | 0.547648193 | 0.425118525 | 0.322293601 | -0.225354591 | 1.43E-13    | 7.73E-11    |
| UTR5 | GALNTL6 | 4  | 172734776/172734843/172734718                                                                                 | 3  | cg03413465/cg15533075/cg26588943                                                                                         | 0.276865617 | 0.363287785 | 0.517858048 | 0.240992432  | 8.58E-10    | 1.83E-08    |
| UTR5 | GALR1   | 18 | 74962216/74962133/74962369                                                                                    | 3  | cg01178451/cg03502002/cg04534765                                                                                         | 0.49479416  | 0.546031383 | 0.688295793 | 0.193501633  | 4.55E-07    | 3.52E-06    |
| UTR5 | GATA3   | 10 | 8097183/8097354/8096818/8097331/8096669/8096991                                                               | 6  | cg10008757/cg13409449/cg14098681/cg14327531/cg15330117/cg18599069                                                        | 0.227427828 | 0.243942861 | 0.389058727 | 0.161630899  | 0.000898001 | 0.003046376 |
| UTR5 | GATA4   | 8  | 11562367/11562685/11565530/11565277/11561724/11561728/11562155/11565725/11563023/11565351                     | 10 | cg00090147/cg03007522/cg06704518/cg14487356/cg14666113/cg18283386/cg21073927/cg24646414/cg24738627/cg25216696            | 0.304089279 | 0.399121798 | 0.562679571 | 0.258590292  | 3.77E-10    | 9.85E-09    |
| UTR5 | GATA5   | 20 | 61051021/61050885/61050914                                                                                    | 3  | cg12664464/cg14831174/cg16919517                                                                                         | 0.269452062 | 0.297427782 | 0.426344664 | 0.156892603  | 0.00203124  | 0.006314098 |
| UTR5 | GCM1    | 6  | 53013589/53011657                                                                                             | 2  | cg26023389/cg27550998                                                                                                    | 0.55671574  | 0.423751589 | 0.338603055 | -0.218112685 | 4.02E-12    | 5.61E-10    |
| UTR5 | GCNT3   | 15 | 59904009/59908160/59908622/59909035/59910436/59909007/59910408/59908999/59908652/59907427                     | 10 | cg02073465/cg05289698/cg05641048/cg06817269/cg09407660/cg11020468/cg19285777/cg22112110/cg23877385/cg25311764            | 0.626550447 | 0.541618708 | 0.461402301 | -0.165148146 | 8.20E-09    | 1.11E-07    |
| UTR5 | GDF6    | 8  | 97172961                                                                                                      | 1  | cg00421139                                                                                                               | 0.25141105  | 0.384316417 | 0.55991715  | 0.3085061    | 3.78E-08    | 4.10E-07    |

|      |          |    |                                                                                                                                                                          |    |                                                                                                                                                                                            |             |             |             |              |             |             |
|------|----------|----|--------------------------------------------------------------------------------------------------------------------------------------------------------------------------|----|--------------------------------------------------------------------------------------------------------------------------------------------------------------------------------------------|-------------|-------------|-------------|--------------|-------------|-------------|
| UTR5 | GFRA1    | 10 | 118032626/118032355/118032033/118031864/118032892/118032872/11803115/118031950/118032081/118032879/118032330/118031870/118032948/118031632/118032987/118031654/118032905 | 17 | cg03503087/cg04983142/cg06039355/cg06298519/cg08194313/cg13346013/cg13890706/cg17256532/cg18044663/cg18672939/cg19236679/cg19485539/cg23898073/cg24792682/cg25022687/cg27034576/cg27341926 | 0.212450643 | 0.305961437 | 0.49126561  | 0.278814968  | 7.29E-06    | 4.06E-05    |
| UTR5 | GFRA2    | 8  | 21645807/21646174/21645923/21645870                                                                                                                                      | 4  | cg00902636/cg06067208/cg09459291/cg14633783                                                                                                                                                | 0.166316193 | 0.209752566 | 0.325174522 | 0.158858329  | 0.002345091 | 0.007179961 |
| UTR5 | GIF      | 11 | 59612937                                                                                                                                                                 | 1  | cg01282204                                                                                                                                                                                 | 0.759301325 | 0.533209667 | 0.396963041 | -0.362338284 | 3.62E-14    | 3.95E-11    |
| UTR5 | GK2      | 4  | 80329368                                                                                                                                                                 | 1  | cg01807825                                                                                                                                                                                 | 0.51540091  | 0.413789967 | 0.324463386 | -0.190937524 | 1.54E-10    | 5.04E-09    |
| UTR5 | GLB1L3   | 11 | 134146324                                                                                                                                                                | 1  | cg18375494                                                                                                                                                                                 | 0.065705825 | 0.098374453 | 0.246427984 | 0.180722159  | 0.003831347 | 0.011186559 |
| UTR5 | GLDC     | 9  | 6645686                                                                                                                                                                  | 1  | cg17009433                                                                                                                                                                                 | 0.119558025 | 0.22920865  | 0.331112304 | 0.211554279  | 0.000997096 | 0.003334385 |
| UTR5 | GLIPR1L1 | 12 | 75728469/75728471                                                                                                                                                        | 2  | cg21087137/cg24234651                                                                                                                                                                      | 0.374702302 | 0.486920539 | 0.57722738  | 0.202525077  | 2.41E-08    | 2.76E-07    |
| UTR5 | GLRA3    | 4  | 175750373/175750109/175750280                                                                                                                                            | 3  | cg05424071/cg21094669/cg27517702                                                                                                                                                           | 0.22069827  | 0.294578594 | 0.467080559 | 0.24638229   | 8.08E-08    | 7.98E-07    |
| UTR5 | GLRB     | 4  | 157997526/157997363/157998201/157997750/157997554/157997880/157997367/157997360                                                                                          | 8  | cg08712866/cg09688546/cg10146199/cg10999932/cg11163620/cg13828794/cg16269431/cg22065614                                                                                                    | 0.223893995 | 0.308681188 | 0.499797991 | 0.275903996  | 3.38E-07    | 2.75E-06    |
| UTR5 | GLTPD2   | 17 | 4692287                                                                                                                                                                  | 1  | cg03704673                                                                                                                                                                                 | 0.617921565 | 0.51379225  | 0.435410741 | -0.182510824 | 1.98E-09    | 3.46E-08    |
| UTR5 | GNAL     | 18 | 11689284/11752215/11751566/11689206/11689218/11752089                                                                                                                    | 6  | cg09331011/cg10068300/cg14612428/cg15616946/cg15653282/cg25958283                                                                                                                          | 0.257031918 | 0.333332644 | 0.428672075 | 0.171640157  | 1.43E-11    | 1.27E-09    |
| UTR5 | GPC6     | 13 | 93879544/93879361/93879670/93879303                                                                                                                                      | 4  | cg12989574/cg16792800/cg18058689/cg19824907                                                                                                                                                | 0.36752897  | 0.43732878  | 0.647716442 | 0.280187472  | 5.95E-09    | 8.62E-08    |
| UTR5 | GPR115   | 6  | 47666329/47668044                                                                                                                                                        | 2  | cg14105536/cg20457051                                                                                                                                                                      | 0.641221538 | 0.496847425 | 0.380031241 | -0.261190297 | 4.04E-12    | 5.61E-10    |

|      |        |    |                                                                                                                                            |    |                                                                                                                                                           |             |             |             |              |             |             |
|------|--------|----|--------------------------------------------------------------------------------------------------------------------------------------------|----|-----------------------------------------------------------------------------------------------------------------------------------------------------------|-------------|-------------|-------------|--------------|-------------|-------------|
| UTR5 | GPR133 | 12 | 131438788/131438737/131438527/131438626/131438523/131438540                                                                                | 6  | cg02717046/cg19642421/cg20712263/cg21502466/cg22882539/cg23379751                                                                                         | 0.256900721 | 0.378264591 | 0.463866477 | 0.206965756  | 1.67E-06    | 1.10E-05    |
| UTR5 | GPR139 | 16 | 20084944/20085047                                                                                                                          | 2  | cg00938050/cg01126567                                                                                                                                     | 0.314935875 | 0.394364972 | 0.519040991 | 0.204105116  | 1.19E-08    | 1.51E-07    |
| UTR5 | GPR183 | 13 | 99959606                                                                                                                                   | 1  | cg16131748                                                                                                                                                | 0.503339165 | 0.602018767 | 0.683022432 | 0.179683267  | 4.96E-11    | 2.52E-09    |
| UTR5 | GPR6   | 6  | 110300308                                                                                                                                  | 1  | cg00613752                                                                                                                                                | 0.57212571  | 0.640209217 | 0.740149914 | 0.168024204  | 3.00E-09    | 4.86E-08    |
| UTR5 | GPR75  | 2  | 54085310/54087008/54087028/54086854/54084393/54087066                                                                                      | 6  | cg00933224/cg01876338/cg14832904/cg19592277/cg19911257/cg19961545                                                                                         | 0.681594619 | 0.769199809 | 0.854285538 | 0.172690919  | 1.54E-13    | 7.95E-11    |
| UTR5 | GPR83  | 11 | 94134446/94134580                                                                                                                          | 2  | cg03345037/cg07586272                                                                                                                                     | 0.23907202  | 0.323759189 | 0.475437886 | 0.236365866  | 3.15E-07    | 2.59E-06    |
| UTR5 | GPR85  | 7  | 112726089/11272659/112726653/112726547/112726774/112726802/112725899/112726538/112726549/112726541/112726869/112726396/112727423/112727506 | 14 | cg00851377/cg01491795/cg03119639/cg06931815/cg08220649/cg10129816/cg10336790/cg13251269/cg20019019/cg20513548/cg21852992/cg24310431/cg24786658/cg25263801 | 0.24230561  | 0.315573642 | 0.397332842 | 0.155027232  | 0.000176976 | 0.000711689 |
| UTR5 | GPR88  | 1  | 101004474/101004472                                                                                                                        | 2  | cg10298815/cg14855972                                                                                                                                     | 0.32309361  | 0.389216217 | 0.523344336 | 0.200250726  | 0.000317051 | 0.001196997 |
| UTR5 | GPX2   | 14 | 65409452                                                                                                                                   | 1  | cg09643186                                                                                                                                                | 0.557926885 | 0.447100383 | 0.363442959 | -0.194483926 | 5.04E-11    | 2.54E-09    |
| UTR5 | GREB1L | 18 | 18822817/18822994/18822637/18822579/18823249/18822927/18823107/18823509                                                                    | 8  | cg01562349/cg01655831/cg03735496/cg05109245/cg07653946/cg12473406/cg14034197/cg26518100                                                                   | 0.229694722 | 0.270573745 | 0.380273234 | 0.150578513  | 0.003667696 | 0.010768534 |
| UTR5 | GRIA1  | 5  | 152870258                                                                                                                                  | 1  | cg17020834                                                                                                                                                | 0.227224285 | 0.232838994 | 0.383978405 | 0.15675412   | 9.80E-05    | 0.000417762 |
| UTR5 | GRIA4  | 11 | 105481306/105481317/105480979/105481319/105481322/105481283/105481509/105481406/105481292                                                  | 9  | cg00343633/cg03225817/cg03243226/cg04747226/cg07972135/cg15603568/cg19343464/cg21217024/cg23559689                                                        | 0.280322231 | 0.413955547 | 0.601997234 | 0.321675003  | 1.68E-08    | 2.02E-07    |
| UTR5 | GRIK1  | 21 | 31312091/31311842                                                                                                                          | 2  | cg09542111/cg23475371                                                                                                                                     | 0.298044425 | 0.394232864 | 0.496377848 | 0.198333423  | 1.11E-07    | 1.04E-06    |



|      |         |    |                                                                                                                                                |    |                                                                                                                                                                                 |             |             |             |              |             |             |
|------|---------|----|------------------------------------------------------------------------------------------------------------------------------------------------|----|---------------------------------------------------------------------------------------------------------------------------------------------------------------------------------|-------------|-------------|-------------|--------------|-------------|-------------|
| UTR5 | GRIK2   | 6  | 101846916/101846905/101847058/101846872/101846967                                                                                              | 5  | cg10591607/cg18193094/cg21635870/cg24301620/cg26316946                                                                                                                          | 0.430119524 | 0.531147041 | 0.650800781 | 0.220681257  | 1.78E-10    | 5.64E-09    |
| UTR5 | GRIN2A  | 16 | 10276375/10276092/10274847/10275410/10274317/1027315/10275934/10275767/10276383/10274632/10276580/10276081/10274415/10276119/10274963/10276600 | 16 | cg00287829/cg02585344/cg03762483/cg03764381/cg04498349/cg04761722/cg05406943/cg06193383/cg06758670/cg06922606/cg09239744/cg09461286/cg15134033/cg16904585/cg18391758/cg24764979 | 0.195926575 | 0.243702152 | 0.378993939 | 0.183067364  | 2.18E-06    | 1.39E-05    |
| UTR5 | GRM1    | 6  | 146348913/146350434/146350618/146350230/146350131/146350585/146350041/146350346/146349488/146349527/146348901/14634890/146349312/146349638     | 14 | cg03478199/cg06015218/cg07218663/cg08076125/cg08958294/cg09558195/cg13371951/cg13722123/cg14526297/cg17199007/cg19512268/cg21725954/cg23696752/cg26256158                       | 0.323994011 | 0.399514664 | 0.511344383 | 0.187350372  | 2.77E-09    | 4.55E-08    |
| UTR5 | GRM7    | 3  | 6902824/6902845/6903019                                                                                                                        | 3  | cg17892178/cg18863595/cg27199820                                                                                                                                                | 0.435273323 | 0.5295267   | 0.687263277 | 0.251989955  | 7.76E-13    | 2.31E-10    |
| UTR5 | GRP     | 18 | 56887410/56887404                                                                                                                              | 2  | cg17093795/cg27338487                                                                                                                                                           | 0.37645826  | 0.466691264 | 0.559288411 | 0.182830151  | 4.00E-07    | 3.17E-06    |
| UTR5 | GSDMB   | 17 | 38074149/38074070/38074753                                                                                                                     | 3  | cg10057218/cg12360886/cg16822095                                                                                                                                                | 0.702448817 | 0.569832328 | 0.463117958 | -0.239330859 | 9.63E-09    | 1.27E-07    |
| UTR5 | GSDMC   | 8  | 130799007/130799093                                                                                                                            | 2  | cg05316065/cg26073844                                                                                                                                                           | 0.558587478 | 0.434942542 | 0.3371831   | -0.221404378 | 1.51E-10    | 4.97E-09    |
| UTR5 | GSTA3   | 6  | 52773711/52774462                                                                                                                              | 2  | cg02075593/cg12445586                                                                                                                                                           | 0.717886065 | 0.618936706 | 0.5224458   | -0.195440265 | 5.95E-09    | 8.62E-08    |
| UTR5 | GSX1    | 13 | 28366814                                                                                                                                       | 1  | cg26609631                                                                                                                                                                      | 0.432714115 | 0.458144839 | 0.595039364 | 0.162325249  | 6.08E-07    | 4.52E-06    |
| UTR5 | GUCA2B  | 1  | 42619118                                                                                                                                       | 1  | cg15976404                                                                                                                                                                      | 0.652472495 | 0.540815244 | 0.454725536 | -0.197746959 | 1.61E-09    | 2.94E-08    |
| UTR5 | GUCY1B3 | 4  | 156680256/156680207                                                                                                                            | 2  | cg03584891/cg16700392                                                                                                                                                           | 0.418848618 | 0.499077622 | 0.617188584 | 0.198339967  | 1.79E-09    | 3.19E-08    |
| UTR5 | GUCY2D  | 17 | 7906042/7906098                                                                                                                                | 2  | cg10020356/cg25465406                                                                                                                                                           | 0.24352308  | 0.337549628 | 0.4396389   | 0.19611582   | 0.000274942 | 0.001055036 |
| UTR5 | GYPC    | 2  | 127413831                                                                                                                                      | 1  | cg15975865                                                                                                                                                                      | 0.30371499  | 0.489046279 | 0.648228845 | 0.344513855  | 2.22E-08    | 2.57E-07    |
| UTR5 | GYS2    | 12 | 21757759                                                                                                                                       | 1  | cg04184278                                                                                                                                                                      | 0.744283985 | 0.595737211 | 0.455469341 | -0.288814644 | 4.46E-10    | 1.11E-08    |

|      |          |    |                                                             |   |                                                                   |             |             |             |              |             |             |
|------|----------|----|-------------------------------------------------------------|---|-------------------------------------------------------------------|-------------|-------------|-------------|--------------|-------------|-------------|
| UTR5 | HAND2    | 4  | 174451251/174450722/174451141                               | 3 | cg02774439/cg10541864/cg25102370                                  | 0.327494068 | 0.395729665 | 0.526202071 | 0.198708003  | 1.46E-05    | 7.56E-05    |
| UTR5 | HAPLN4   | 19 | 19373566/19373575                                           | 2 | cg01297721/cg22694191                                             | 0.33803368  | 0.375740819 | 0.525827877 | 0.187794197  | 0.000405526 | 0.001488007 |
| UTR5 | HBE1     | 11 | 5291298/5291214                                             | 2 | cg03306956/cg16279158                                             | 0.5609776   | 0.500748483 | 0.367565418 | -0.193412182 | 9.25E-09    | 1.23E-07    |
| UTR5 | HBQ1     | 16 | 230343/230341                                               | 2 | cg02401454/cg07703401                                             | 0.32724683  | 0.338138094 | 0.520321184 | 0.193074354  | 4.73E-05    | 0.000216952 |
| UTR5 | HCRTR2   | 6  | 55039232/55039259/55039382/55039295                         | 4 | cg10725720/cg13948987/cg17240815/cg27596495                       | 0.282031535 | 0.328409048 | 0.488993624 | 0.206962089  | 1.05E-07    | 1.00E-06    |
| UTR5 | HECW2    | 2  | 197454821/197456953/197457277/197456534/197399559/197328556 | 6 | cg12949542/cg13308279/cg13821072/cg16616765/cg20197814/cg23490246 | 0.5250839   | 0.403734391 | 0.307906789 | -0.217177111 | 6.49E-13    | 2.12E-10    |
| UTR5 | HEPHL1   | 11 | 93754390                                                    | 1 | cg18109485                                                        | 0.454738565 | 0.361792817 | 0.26383015  | -0.190908415 | 1.92E-12    | 3.63E-10    |
| UTR5 | HGD      | 3  | 120401058/120401095                                         | 2 | cg04546097/cg14527029                                             | 0.534031683 | 0.436645867 | 0.35923247  | -0.174799212 | 2.45E-10    | 7.26E-09    |
| UTR5 | HK3      | 5  | 176325836/176323419                                         | 2 | cg14709481/cg26455624                                             | 0.6726854   | 0.599768147 | 0.521455927 | -0.151229473 | 4.05E-09    | 6.27E-08    |
| UTR5 | HMGCS2   | 1  | 120311542                                                   | 1 | cg13976683                                                        | 0.542833315 | 0.417908067 | 0.341307155 | -0.20152616  | 4.79E-11    | 2.47E-09    |
| UTR5 | HMX2     | 10 | 124907708                                                   | 1 | cg19909787                                                        | 0.159048506 | 0.238984549 | 0.40401015  | 0.244961644  | 4.69E-06    | 2.73E-05    |
| UTR5 | HNF4A    | 20 | 43029994/43029992/43029997                                  | 3 | cg07064544/cg11542165/cg21058973                                  | 0.61706196  | 0.507987878 | 0.420796634 | -0.196265326 | 5.76E-10    | 1.33E-08    |
| UTR5 | HOXA2    | 7  | 27142204/27142275/27142200                                  | 3 | cg06055873/cg20747380/cg26069745                                  | 0.427260785 | 0.507594139 | 0.626423341 | 0.199162556  | 1.51E-05    | 7.80E-05    |
| UTR5 | HOXB8    | 17 | 46692248/46692168                                           | 2 | cg15539420/cg22913933                                             | 0.481826075 | 0.346464283 | 0.284562341 | -0.197263734 | 9.15E-05    | 0.000394069 |
| UTR5 | HOXC9    | 12 | 54393966/54393971                                           | 2 | cg05069426/cg12071536                                             | 0.28800951  | 0.364417672 | 0.572085011 | 0.284075501  | 5.59E-07    | 4.21E-06    |
| UTR5 | HRNR     | 1  | 152196597/152196415/152196106                               | 3 | cg07252308/cg11344574/cg26020982                                  | 0.661658033 | 0.553834609 | 0.482814003 | -0.17884403  | 8.79E-14    | 6.42E-11    |
| UTR5 | HS3ST3A1 | 17 | 13504687/13505174/13504472                                  | 3 | cg03436461/cg07480567/cg22583981                                  | 0.316983335 | 0.388993817 | 0.490615809 | 0.173632474  | 6.13E-05    | 0.000274353 |
| UTR5 | HS3ST4   | 16 | 25703528                                                    | 1 | cg27014135                                                        | 0.138987107 | 0.142758383 | 0.304199981 | 0.165212874  | 0.011901243 | 0.030556047 |
| UTR5 | HSPB2    | 11 | 111783499                                                   | 1 | cg12947833                                                        | 0.51617949  | 0.628325778 | 0.707200559 | 0.191021069  | 7.60E-11    | 3.22E-09    |
| UTR5 | HSPB3    | 5  | 53751493                                                    | 1 | cg01246617                                                        | 0.697327045 | 0.493130772 | 0.357341864 | -0.339985181 | 1.38E-14    | 3.57E-11    |
| UTR5 | HTN3     | 4  | 70896083                                                    | 1 | cg14948804                                                        | 0.57341634  | 0.450426156 | 0.325037164 | -0.248379176 | 6.94E-09    | 9.69E-08    |
| UTR5 | HTR5A    | 7  | 154862548                                                   | 1 | cg11298960                                                        | 0.458647245 | 0.538161761 | 0.638002945 | 0.1793557    | 6.67E-08    | 6.73E-07    |
| UTR5 | HTR7     | 10 | 92617429/92617562                                           | 2 | cg15364725/cg26135506                                             | 0.201898507 | 0.225477729 | 0.384857195 | 0.182958688  | 0.000187765 | 0.000752637 |
| UTR5 | HTRA3    | 4  | 8271507                                                     | 1 | cg09495977                                                        | 0.246006178 | 0.249152199 | 0.40332575  | 0.157319573  | 0.002922907 | 0.008765188 |

|      |         |    |                                                                   |   |                                                                               |             |             |             |              |             |             |
|------|---------|----|-------------------------------------------------------------------|---|-------------------------------------------------------------------------------|-------------|-------------|-------------|--------------|-------------|-------------|
| UTR5 | HYAL1   | 3  | 50341183/5034056<br>4/50341074/503412<br>93/50341009/50341<br>694 | 6 | cg06360465/cg10580<br>282/cg11607701/cg1<br>2930727/cg14943722<br>/cg20724227 | 0.677079064 | 0.550714635 | 0.473902068 | -0.203176996 | 6.44E-09    | 9.18E-08    |
| UTR5 | IBSP    | 4  | 88722338                                                          | 1 | cg16909685                                                                    | 0.68263131  | 0.55958395  | 0.432273336 | -0.250357974 | 1.83E-08    | 2.17E-07    |
| UTR5 | IFI27   | 14 | 94577218/9457710<br>1/94577514                                    | 3 | cg08036899/cg10778<br>971/cg20161089                                          | 0.46710237  | 0.384939517 | 0.315388636 | -0.151713734 | 2.70E-09    | 4.47E-08    |
| UTR5 | IFLTD1  | 12 | 25705953                                                          | 1 | cg15461781                                                                    | 0.743101665 | 0.645694244 | 0.503263105 | -0.23983856  | 2.64E-05    | 0.000128366 |
| UTR5 | IGFL2   | 19 | 46651227/4665108<br>7/46651553                                    | 3 | cg10833393/cg20459<br>022/cg21084674                                          | 0.684816412 | 0.582644956 | 0.532426605 | -0.152389807 | 1.18E-11    | 1.11E-09    |
| UTR5 | IGFL4   | 19 | 46544240                                                          | 1 | cg27048142                                                                    | 0.61426804  | 0.466338333 | 0.368022105 | -0.246245935 | 1.02E-09    | 2.06E-08    |
| UTR5 | IL12B   | 5  | 158754684/158757<br>456                                           | 2 | cg15216232/cg18307<br>303                                                     | 0.651192595 | 0.548948333 | 0.458741455 | -0.19245114  | 6.27E-08    | 6.36E-07    |
| UTR5 | IL18RAP | 2  | 103039542/103035<br>835/103038171                                 | 3 | cg13897122/cg21282<br>997/cg27361520                                          | 0.649130895 | 0.567147328 | 0.493154689 | -0.155976206 | 4.65E-08    | 4.91E-07    |
| UTR5 | IL22    | 12 | 68647280                                                          | 1 | cg11520493                                                                    | 0.83779575  | 0.797853883 | 0.657353691 | -0.180442059 | 3.79E-06    | 2.27E-05    |
| UTR5 | IL25    | 14 | 23842125                                                          | 1 | cg07258507                                                                    | 0.42593412  | 0.331148294 | 0.238360264 | -0.187573856 | 2.46E-11    | 1.71E-09    |
| UTR5 | IL4     | 5  | 132009630                                                         | 1 | cg12377972                                                                    | 0.79358193  | 0.722593817 | 0.610814186 | -0.182767744 | 1.10E-06    | 7.65E-06    |
| UTR5 | INHBA   | 7  | 41741428/4174263<br>0/41741671                                    | 3 | cg09138133/cg11079<br>619/cg15291905                                          | 0.69404725  | 0.619499531 | 0.528663752 | -0.165383498 | 1.82E-08    | 2.17E-07    |
| UTR5 | IRAK3   | 12 | 66583029/6658304<br>8                                             | 2 | cg01263292/cg26415<br>547                                                     | 0.088190073 | 0.150723497 | 0.330097085 | 0.241907013  | 2.15E-05    | 0.000106558 |
| UTR5 | IRF4    | 6  | 391936/392555/393<br>110/392131/391764                            | 5 | cg06392169/cg12612<br>118/cg12684209/cg1<br>2741420/cg17228900                | 0.237617969 | 0.435077595 | 0.610867689 | 0.37324972   | 1.36E-09    | 2.57E-08    |
| UTR5 | IRX4    | 5  | 1882775/1882871                                                   | 2 | cg03679565/cg03963<br>198                                                     | 0.296017495 | 0.365641589 | 0.537900323 | 0.241882828  | 0.000114971 | 0.000485145 |
| UTR5 | ITGA4   | 2  | 182322268/182322<br>058/182321855/182<br>322279/182321786         | 5 | cg06952671/cg10526<br>659/cg20415809/cg2<br>1995919/cg25652029                | 0.264610925 | 0.464160694 | 0.63316878  | 0.368557855  | 3.16E-10    | 8.78E-09    |
| UTR5 | ITIH4   | 3  | 52864659/5286469<br>4                                             | 2 | cg10929387/cg11645<br>453                                                     | 0.718289485 | 0.606850944 | 0.554575986 | -0.163713499 | 1.61E-06    | 1.07E-05    |
| UTR5 | ITIH5   | 10 | 7661611/7708869                                                   | 2 | cg00677195/cg04711<br>998                                                     | 0.50065485  | 0.566033614 | 0.659438561 | 0.158783711  | 6.94E-09    | 9.69E-08    |
| UTR5 | IVL     | 1  | 152881119/152881<br>815/152881930                                 | 3 | cg05440289/cg15486<br>123/cg21419383                                          | 0.762569447 | 0.6899959   | 0.60233433  | -0.160235116 | 2.25E-09    | 3.85E-08    |
| UTR5 | IYD     | 6  | 150690125/150690<br>143                                           | 2 | cg02307277/cg20416<br>179                                                     | 0.531765885 | 0.431119939 | 0.344286614 | -0.187479271 | 4.21E-11    | 2.28E-09    |
| UTR5 | IZUMO1  | 19 | 49249123/4924993<br>2/49250080                                    | 3 | cg08610426/cg10234<br>985/cg18537730                                          | 0.557122048 | 0.64113363  | 0.751633662 | 0.194511614  | 2.14E-08    | 2.50E-07    |

|      |         |    |                                                                                                                                                                                       |    |                                                                                                                                                                                                          |             |             |             |              |             |             |
|------|---------|----|---------------------------------------------------------------------------------------------------------------------------------------------------------------------------------------|----|----------------------------------------------------------------------------------------------------------------------------------------------------------------------------------------------------------|-------------|-------------|-------------|--------------|-------------|-------------|
| UTR5 | JAM2    | 21 | 27011788/2701196<br>3/27011793/270120<br>66                                                                                                                                           | 4  | cg02485200/cg13769<br>223/cg14553600/cg2<br>2627390                                                                                                                                                      | 0.114209011 | 0.203837442 | 0.343226049 | 0.229017038  | 1.60E-05    | 8.20E-05    |
| UTR5 | KAZALD1 | 10 | 102821427/102821<br>670/102822249/102<br>821684/102822002/<br>102821848/102822<br>201/102821552/102<br>821565                                                                         | 9  | cg07638935/cg08227<br>353/cg10342899/cg1<br>2060422/cg13269555<br>/cg15302379/cg1733<br>3042/cg23534216/cg<br>26605164                                                                                   | 0.422940507 | 0.313637413 | 0.238274637 | -0.18466587  | 5.25E-13    | 1.80E-10    |
| UTR5 | KCNA1   | 12 | 5019933/5019311/5<br>019482/5019091/50<br>20169/5020202                                                                                                                               | 6  | cg06204922/cg09487<br>611/cg10363246/cg1<br>2908522/cg16907029<br>/cg26590537                                                                                                                            | 0.213254822 | 0.335016138 | 0.536760808 | 0.323505987  | 1.83E-08    | 2.17E-07    |
| UTR5 | KCNA3   | 1  | 111217575/111217<br>497                                                                                                                                                               | 2  | cg01423964/cg11595<br>545                                                                                                                                                                                | 0.225400212 | 0.447031806 | 0.578786818 | 0.353386607  | 1.86E-11    | 1.53E-09    |
| UTR5 | KCNA5   | 12 | 5153174/5153288                                                                                                                                                                       | 2  | cg16897114/cg20792<br>062                                                                                                                                                                                | 0.322068494 | 0.458806277 | 0.587434582 | 0.265366088  | 7.63E-11    | 3.22E-09    |
| UTR5 | KCNA6   | 12 | 4919001/4919138/4<br>919081/4918391/49<br>18848                                                                                                                                       | 5  | cg01175812/cg11224<br>582/cg19870512/cg2<br>6162582/cg26858704                                                                                                                                           | 0.232089593 | 0.336341236 | 0.440985895 | 0.208896302  | 0.000989008 | 0.00331343  |
| UTR5 | KCNB1   | 20 | 48099146                                                                                                                                                                              | 1  | cg26709285                                                                                                                                                                                               | 0.531989195 | 0.600984622 | 0.722353068 | 0.190363873  | 4.13E-10    | 1.05E-08    |
| UTR5 | KCNC2   | 12 | 75601824/7560334<br>3/75601928/756034<br>01/75603184/75601<br>803/75603068/7560<br>3480                                                                                               | 8  | cg10148473/cg11308<br>277/cg16370491/cg1<br>8573383/cg21500166<br>/cg25820699/cg2607<br>4603/cg27154343                                                                                                  | 0.37640507  | 0.495046153 | 0.635358596 | 0.258953526  | 1.54E-10    | 5.03E-09    |
| UTR5 | KCNH4   | 17 | 40333009                                                                                                                                                                              | 1  | cg17812788                                                                                                                                                                                               | 0.175100328 | 0.203774286 | 0.3549292   | 0.179828873  | 0.000911142 | 0.003084209 |
| UTR5 | KCNH7   | 2  | 163695190/163695<br>111                                                                                                                                                               | 2  | cg10132588/cg14781<br>189                                                                                                                                                                                | 0.41570884  | 0.508834197 | 0.626071409 | 0.210362569  | 1.41E-10    | 4.77E-09    |
| UTR5 | KCNIP1  | 5  | 169931363/169931<br>092/169931241                                                                                                                                                     | 3  | cg01585372/cg08422<br>599/cg11284411                                                                                                                                                                     | 0.389190825 | 0.48636765  | 0.599274682 | 0.210083857  | 1.08E-08    | 1.40E-07    |
| UTR5 | KCNJ1   | 11 | 128729652/128737<br>201/128736844/128<br>712697/128712280/<br>128712399/128730<br>011/128712645/128<br>732986/128729883/<br>128712462/128729<br>960/128712417/128<br>711233/128712932 | 15 | cg04191300/cg04367<br>216/cg05193832/cg0<br>6995869/cg07168810<br>/cg07713705/cg1205<br>5220/cg12204555/cg<br>14631438/cg1512779<br>1/cg20962532/cg234<br>18180/cg25194720/c<br>g25751961/cg258373<br>40 | 0.706942754 | 0.645965869 | 0.55372432  | -0.153218433 | 1.54E-08    | 1.88E-07    |

|      |           |    |                                                       |   |                                                                   |             |             |             |              |             |             |
|------|-----------|----|-------------------------------------------------------|---|-------------------------------------------------------------------|-------------|-------------|-------------|--------------|-------------|-------------|
| UTR5 | KDR       | 4  | 55991683/55991701                                     | 2 | cg10740902/cg25722465                                             | 0.523004225 | 0.591848633 | 0.682941223 | 0.159936998  | 3.79E-10    | 9.88E-09    |
| UTR5 | KERA      | 12 | 91451819                                              | 1 | cg20332354                                                        | 0.574654435 | 0.43442825  | 0.333692345 | -0.24096209  | 4.87E-11    | 2.50E-09    |
| UTR5 | KHDRBS2   | 6  | 62995876/62996022/62995963                            | 3 | cg00472801/cg16587616/cg18239753                                  | 0.395316767 | 0.479496617 | 0.604159612 | 0.208842845  | 8.58E-08    | 8.39E-07    |
| UTR5 | KIAA0495  | 1  | 3663339/3663832/3663435/3663531/3663164/3663705       | 6 | cg01793449/cg05491852/cg10634619/cg15472784/cg23666378/cg25467973 | 0.449539479 | 0.568619208 | 0.703423341 | 0.253883862  | 8.91E-10    | 1.88E-08    |
| UTR5 | KIAA0802  | 18 | 8717926/8717905                                       | 2 | cg07955887/cg19522644                                             | 0.68367303  | 0.471543494 | 0.395284905 | -0.288388125 | 9.83E-13    | 2.71E-10    |
| UTR5 | KIRREL2   | 19 | 36347907/36347919                                     | 2 | cg00519185/cg09479015                                             | 0.162045664 | 0.267688109 | 0.350421579 | 0.188375915  | 0.000146957 | 0.000602097 |
| UTR5 | KLHL1     | 13 | 70682098/70682019/70682324/70682604/70682127/70682525 | 6 | cg01661350/cg12917718/cg20523861/cg23267558/cg24014143/cg24401870 | 0.368882528 | 0.435305449 | 0.519576602 | 0.150694074  | 7.49E-07    | 5.44E-06    |
| UTR5 | KLK12     | 19 | 51538134                                              | 1 | cg24368865                                                        | 0.46914602  | 0.380552894 | 0.280538386 | -0.188607634 | 2.98E-10    | 8.41E-09    |
| UTR5 | KLKB1     | 4  | 187148688                                             | 1 | cg12536028                                                        | 0.557554245 | 0.435691661 | 0.345760305 | -0.21179394  | 1.79E-10    | 5.65E-09    |
| UTR5 | KRT38     | 17 | 39597402                                              | 1 | cg25306838                                                        | 0.4231071   | 0.347799894 | 0.264167418 | -0.158939682 | 4.41E-10    | 1.10E-08    |
| UTR5 | KRT7      | 12 | 52627047                                              | 1 | cg09670128                                                        | 0.37070131  | 0.531059411 | 0.734100745 | 0.363399435  | 6.18E-11    | 2.88E-09    |
| UTR5 | KRT72     | 12 | 52995250/52995295                                     | 2 | cg18161890/cg20050826                                             | 0.537895373 | 0.634271478 | 0.723837475 | 0.185942103  | 1.89E-09    | 3.32E-08    |
| UTR5 | KRT80     | 12 | 52585695                                              | 1 | cg16432350                                                        | 0.55077068  | 0.459402311 | 0.381649923 | -0.169120757 | 1.30E-09    | 2.50E-08    |
| UTR5 | KRTAP24-1 | 21 | 31655261                                              | 1 | cg07172334                                                        | 0.56064531  | 0.332883772 | 0.239309864 | -0.321335446 | 3.78E-12    | 5.48E-10    |
| UTR5 | KY        | 3  | 134369828                                             | 1 | cg23201032                                                        | 0.232375405 | 0.286864915 | 0.3872008   | 0.154825395  | 0.000320049 | 0.001207214 |
| UTR5 | L1TD1     | 1  | 62660861/62664360/62660741/62660556/62660624/62662166 | 6 | cg03731268/cg11146821/cg12640000/cg19594218/cg23049458/cg27424906 | 0.471648051 | 0.338231044 | 0.296492537 | -0.175155514 | 1.88E-09    | 3.31E-08    |
| UTR5 | LAMA1     | 18 | 7117790                                               | 1 | cg18764577                                                        | 0.33890274  | 0.440777189 | 0.599022482 | 0.260119742  | 1.03E-11    | 1.03E-09    |
| UTR5 | LAMB3     | 1  | 209825747/209824825/209825678/209825672/209825731     | 5 | cg03977657/cg20416769/cg22502856/cg26107033/cg26533764            | 0.565542667 | 0.455648091 | 0.373599841 | -0.191942826 | 7.97E-11    | 3.27E-09    |
| UTR5 | LAYN      | 11 | 111411289/111411381                                   | 2 | cg02532096/cg03864000                                             | 0.291250943 | 0.420109953 | 0.501159723 | 0.20990878   | 7.65E-06    | 4.23E-05    |
| UTR5 | LCE1B     | 1  | 152784914                                             | 1 | cg07090653                                                        | 0.729669125 | 0.6528083   | 0.479028127 | -0.250640998 | 1.89E-06    | 1.23E-05    |
| UTR5 | LCE1D     | 1  | 152769246/152769896                                   | 2 | cg11583211/cg11835200                                             | 0.513716928 | 0.378414683 | 0.274873037 | -0.23884389  | 5.17E-13    | 1.80E-10    |
| UTR5 | LCE1E     | 1  | 152759772/152758755                                   | 2 | cg16987735/cg21065959                                             | 0.50352849  | 0.384179033 | 0.302360068 | -0.201168422 | 2.16E-10    | 6.60E-09    |
| UTR5 | LCE2D     | 1  | 152635878/152636074                                   | 2 | cg16361876/cg21312148                                             | 0.680842535 | 0.5766596   | 0.4701227   | -0.210719835 | 1.34E-07    | 1.23E-06    |

|      |              |    |                                         |   |                                             |             |             |             |              |             |             |
|------|--------------|----|-----------------------------------------|---|---------------------------------------------|-------------|-------------|-------------|--------------|-------------|-------------|
| UTR5 | LCE3D        | 1  | 152552494                               | 1 | cg20676475                                  | 0.71794003  | 0.551679256 | 0.380826986 | -0.337113044 | 2.19E-11    | 1.65E-09    |
| UTR5 | LCE3E        | 1  | 152538888/152538857                     | 2 | cg23110514/cg24000437                       | 0.577017838 | 0.439957958 | 0.318514782 | -0.258503056 | 1.33E-13    | 7.47E-11    |
| UTR5 | LCE6A        | 1  | 152815459/152815843                     | 2 | cg00998782/cg13366738                       | 0.582232658 | 0.480953378 | 0.40564598  | -0.176586678 | 5.28E-08    | 5.48E-07    |
| UTR5 | LCN2         | 9  | 130911792                               | 1 | cg22438810                                  | 0.47500126  | 0.371037206 | 0.284364823 | -0.190636437 | 4.28E-12    | 5.77E-10    |
| UTR5 | LELP1        | 1  | 153176083/153177032                     | 2 | cg02886578/cg21936464                       | 0.572080785 | 0.457009633 | 0.37048255  | -0.201598235 | 4.33E-06    | 2.54E-05    |
| UTR5 | LFNG         | 7  | 2557715                                 | 1 | cg20572537                                  | 0.539025405 | 0.371185094 | 0.294986845 | -0.24403856  | 2.44E-11    | 1.71E-09    |
| UTR5 | LGALS4       | 19 | 39303698                                | 1 | cg19419519                                  | 0.51058788  | 0.380183917 | 0.294491536 | -0.216096344 | 1.30E-10    | 4.46E-09    |
| UTR5 | LHFPL4       | 3  | 9594385/9595269/9594382/9595395         | 4 | cg04061117/cg06838365/cg19099050/cg19822251 | 0.399782828 | 0.469894613 | 0.597688253 | 0.197905426  | 2.04E-10    | 6.30E-09    |
| UTR5 | LILRA6       | 19 | 54746613                                | 1 | cg19835973                                  | 0.72572726  | 0.584950672 | 0.542445532 | -0.183281728 | 6.83E-05    | 0.000302509 |
| UTR5 | LILRB3       | 19 | 54726870                                | 1 | cg15816012                                  | 0.64083175  | 0.532339556 | 0.488177741 | -0.152654009 | 1.77E-06    | 1.16E-05    |
| UTR5 | LIN28        | 1  | 26737318/26737272                       | 2 | cg02388865/cg19706817                       | 0.316462558 | 0.4353874   | 0.497957273 | 0.181494715  | 7.56E-07    | 5.49E-06    |
| UTR5 | LIN28B       | 6  | 105405068                               | 1 | cg04560456                                  | 0.330428215 | 0.378783794 | 0.543564627 | 0.213136412  | 2.34E-06    | 1.49E-05    |
| UTR5 | LMO1         | 11 | 8285086/8284997/8285031                 | 3 | cg05245226/cg07283152/cg21460402            | 0.147183635 | 0.161614728 | 0.299076456 | 0.151892821  | 0.001208018 | 0.003972084 |
| UTR5 | LOC100302652 | 2  | 54087066                                | 1 | cg19961545                                  | 0.564480035 | 0.679589256 | 0.815680955 | 0.25120092   | 2.04E-13    | 9.39E-11    |
| UTR5 | LOC169834    | 9  | 115773738/115771599                     | 2 | cg00019877/cg14056849                       | 0.69703368  | 0.614172244 | 0.5114797   | -0.18555398  | 9.82E-08    | 9.40E-07    |
| UTR5 | LOC200726    | 2  | 207507528/207507163/207507421           | 3 | cg12848065/cg22944499/cg25146557            | 0.439611425 | 0.500116722 | 0.624982723 | 0.185371298  | 1.21E-07    | 1.13E-06    |
| UTR5 | LOC728392    | 17 | 5404508/5404330/5404337                 | 3 | cg06462347/cg22298430/cg27230784            | 0.06618335  | 0.104406035 | 0.269477279 | 0.203293929  | 0.000446186 | 0.001620089 |
| UTR5 | LONRF2       | 2  | 100939045/100938903/100938813/100938799 | 4 | cg07304692/cg14675211/cg14997226/cg23977631 | 0.084088822 | 0.258085331 | 0.391470726 | 0.307381903  | 4.06E-08    | 4.36E-07    |
| UTR5 | LOXHD1       | 18 | 44098826/44099028/44139159              | 3 | cg07931960/cg12934788/cg20454888            | 0.602301588 | 0.502350575 | 0.388695468 | -0.213606119 | 6.10E-11    | 2.86E-09    |
| UTR5 | LPA          | 6  | 161087339/161086715                     | 2 | cg10836120/cg17028067                       | 0.66854474  | 0.563267111 | 0.491352743 | -0.177191997 | 1.46E-07    | 1.32E-06    |
| UTR5 | LRFN4        | 11 | 66625106/66625164                       | 2 | cg11862081/cg15320059                       | 0.553181175 | 0.449167631 | 0.38776835  | -0.165412825 | 4.02E-13    | 1.56E-10    |
| UTR5 | LTF          | 3  | 46506374                                | 1 | cg15261665                                  | 0.51536741  | 0.585800356 | 0.667935541 | 0.152568131  | 6.48E-09    | 9.21E-08    |
| UTR5 | LUZP2        | 11 | 24518737/24518776                       | 2 | cg06931933/cg09717526                       | 0.277360133 | 0.309575603 | 0.460539434 | 0.183179302  | 2.11E-05    | 0.000104776 |

|      |          |    |                                                                                                                         |    |                                                                                                                                     |             |             |             |              |             |             |
|------|----------|----|-------------------------------------------------------------------------------------------------------------------------|----|-------------------------------------------------------------------------------------------------------------------------------------|-------------|-------------|-------------|--------------|-------------|-------------|
| UTR5 | LY6H     | 8  | 144241434/144242029/144241120/144241104/144241407/144241809                                                             | 6  | cg02539855/cg03699469/cg09528449/cg10821845/cg23484951/cg26663686                                                                   | 0.242604549 | 0.322622021 | 0.429467291 | 0.186862742  | 5.08E-05    | 0.000230732 |
| UTR5 | LYZL4    | 3  | 42451096/42451876/42451986                                                                                              | 3  | cg00212520/cg21044104/cg25867632                                                                                                    | 0.5998932   | 0.495703911 | 0.433341662 | -0.166551538 | 3.06E-08    | 3.41E-07    |
| UTR5 | LZTS1    | 8  | 20112763                                                                                                                | 1  | cg01664925                                                                                                                          | 0.648981185 | 0.574257428 | 0.496948045 | -0.15203314  | 5.23E-06    | 3.01E-05    |
| UTR5 | MAL      | 2  | 95691500                                                                                                                | 1  | cg22403344                                                                                                                          | 0.132396917 | 0.293686192 | 0.438046159 | 0.305649243  | 1.19E-08    | 1.52E-07    |
| UTR5 | MAP4K1   | 19 | 39108609                                                                                                                | 1  | cg19457477                                                                                                                          | 0.526199    | 0.639454106 | 0.724490768 | 0.198291768  | 8.73E-08    | 8.50E-07    |
| UTR5 | MAP9     | 4  | 156297854/156297942/156298050/156297858/156297616/156298002                                                             | 6  | cg03405515/cg03616357/cg08015755/cg15397448/cg17780956/cg20334243                                                                   | 0.167640528 | 0.307872058 | 0.421026315 | 0.253385787  | 3.36E-05    | 0.000159643 |
| UTR5 | 1-Mar    | 4  | 165119501/16511829/165118368/165118930/165118938/165118868/165304394                                                    | 7  | cg09248897/cg16244944/cg19400238/cg23679141/cg24132580/cg25932496/cg26320830                                                        | 0.713920753 | 0.617985136 | 0.563648559 | -0.150272193 | 2.41E-11    | 1.70E-09    |
| UTR5 | MARVELD2 | 5  | 68711277/68711640/68711519                                                                                              | 3  | cg02505827/cg04091702/cg16419724                                                                                                    | 0.41348682  | 0.316281989 | 0.256951732 | -0.156535088 | 3.68E-10    | 9.68E-09    |
| UTR5 | MC3R     | 20 | 54823878                                                                                                                | 1  | cg24298684                                                                                                                          | 0.450022515 | 0.331019572 | 0.246476718 | -0.203545797 | 1.68E-12    | 3.47E-10    |
| UTR5 | MDFI     | 6  | 41606317/41606439                                                                                                       | 2  | cg01350077/cg27200446                                                                                                               | 0.134761777 | 0.262817074 | 0.459091135 | 0.324329358  | 1.36E-06    | 9.17E-06    |
| UTR5 | MEI1     | 22 | 42095536                                                                                                                | 1  | cg11260046                                                                                                                          | 0.40945288  | 0.503480361 | 0.618011595 | 0.208558715  | 5.50E-06    | 3.14E-05    |
| UTR5 | MFRP     | 11 | 119217331                                                                                                               | 1  | cg09186818                                                                                                                          | 0.48301678  | 0.414818267 | 0.315081205 | -0.167935575 | 1.64E-09    | 2.99E-08    |
| UTR5 | MGAM     | 7  | 141695711/141695759                                                                                                     | 2  | cg01551699/cg18971054                                                                                                               | 0.521092418 | 0.434172056 | 0.3607364   | -0.160356018 | 8.10E-11    | 3.29E-09    |
| UTR5 | MGAT5B   | 17 | 74865068                                                                                                                | 1  | cg00654814                                                                                                                          | 0.078900668 | 0.159799848 | 0.252306276 | 0.173405608  | 1.20E-05    | 6.31E-05    |
| UTR5 | MGC26647 | 7  | 88424985                                                                                                                | 1  | cg19682786                                                                                                                          | 0.787220455 | 0.720656683 | 0.610087027 | -0.177133428 | 4.98E-06    | 2.88E-05    |
| UTR5 | MIA2     | 14 | 39703302                                                                                                                | 1  | cg24603941                                                                                                                          | 0.64484315  | 0.5140377   | 0.41682725  | -0.2280159   | 8.05E-09    | 1.10E-07    |
| UTR5 | MMD2     | 7  | 4998714/4998649                                                                                                         | 2  | cg26468007/cg27603283                                                                                                               | 0.263741423 | 0.340103578 | 0.49909633  | 0.235354907  | 3.27E-07    | 2.68E-06    |
| UTR5 | MME      | 3  | 154797867/154797508/154798079/154797592/154797589/154797563/154797958/154797677/154797779/154797947/154797917/154797892 | 12 | cg02108850/cg03648334/cg05962239/cg14750844/cg16580737/cg17344755/cg20216802/cg21496658/cg22471230/cg22955973/cg23209255/cg26872138 | 0.104540567 | 0.14668136  | 0.259106174 | 0.154565607  | 0.004505674 | 0.012915294 |
| UTR5 | MMP12    | 11 | 102745682                                                                                                               | 1  | cg20487452                                                                                                                          | 0.61555095  | 0.455733928 | 0.3300052   | -0.28554575  | 3.77E-14    | 3.95E-11    |

|      |         |    |                                                                                       |   |                                                                                              |             |             |             |              |             |             |
|------|---------|----|---------------------------------------------------------------------------------------|---|----------------------------------------------------------------------------------------------|-------------|-------------|-------------|--------------|-------------|-------------|
| UTR5 | MMP7    | 11 | 102401438                                                                             | 1 | cg25511807                                                                                   | 0.37490179  | 0.281074117 | 0.208489595 | -0.166412195 | 9.84E-11    | 3.70E-09    |
| UTR5 | MN1     | 22 | 28196834/2819719<br>7/28197091                                                        | 3 | cg00278028/cg26099<br>061/cg27269921                                                         | 0.19237339  | 0.270592073 | 0.392676425 | 0.200303036  | 0.00011587  | 0.000488278 |
| UTR5 | MRGPRX3 | 11 | 18157898/1815740<br>5                                                                 | 2 | cg07656579/cg10378<br>819                                                                    | 0.802569685 | 0.719069706 | 0.548679564 | -0.253890121 | 3.78E-07    | 3.03E-06    |
| UTR5 | MRPS21  | 1  | 150266604/150266<br>477/150266643/150<br>266645/150266311/<br>150266488/150266<br>313 | 7 | cg02460371/cg08293<br>086/cg09808343/cg1<br>5934674/cg18031008<br>/cg23819679/cg2653<br>5484 | 0.197437178 | 0.26105832  | 0.399404685 | 0.201967507  | 7.03E-05    | 0.000310574 |
| UTR5 | MS4A2   | 11 | 59856225                                                                              | 1 | cg27533472                                                                                   | 0.77252679  | 0.670307089 | 0.591417223 | -0.181109567 | 2.14E-09    | 3.70E-08    |
| UTR5 | MSC     | 8  | 72756656                                                                              | 1 | cg23710218                                                                                   | 0.321671095 | 0.438835856 | 0.545340823 | 0.223669728  | 1.26E-07    | 1.16E-06    |
| UTR5 | MST1    | 3  | 49726151                                                                              | 1 | cg17781925                                                                                   | 0.560604335 | 0.465950656 | 0.407951073 | -0.152653262 | 3.60E-10    | 9.55E-09    |
| UTR5 | MUC15   | 11 | 26593556/2659365<br>8                                                                 | 2 | cg03087937/cg06056<br>884                                                                    | 0.568207505 | 0.502954472 | 0.397117164 | -0.171090341 | 2.25E-07    | 1.93E-06    |
| UTR5 | MYF6    | 12 | 81101474                                                                              | 1 | cg20171297                                                                                   | 0.473562055 | 0.4037161   | 0.306037386 | -0.167524669 | 9.87E-10    | 2.01E-08    |
| UTR5 | MYH1    | 17 | 10421635/1042136<br>5                                                                 | 2 | cg00421089/cg00933<br>692                                                                    | 0.815634563 | 0.738517422 | 0.642775495 | -0.172859067 | 3.67E-08    | 4.01E-07    |
| UTR5 | MYH13   | 17 | 10276260                                                                              | 1 | cg21376148                                                                                   | 0.52202167  | 0.422401772 | 0.343106009 | -0.178915661 | 6.73E-09    | 9.47E-08    |
| UTR5 | MYH6    | 14 | 23876824/2387713<br>0                                                                 | 2 | cg10250660/cg14541<br>311                                                                    | 0.5903452   | 0.497532986 | 0.422626382 | -0.167718818 | 1.13E-10    | 4.05E-09    |
| UTR5 | MYL5    | 4  | 671791                                                                                | 1 | cg17073306                                                                                   | 0.415675175 | 0.343768378 | 0.262411736 | -0.153263439 | 7.29E-10    | 1.60E-08    |
| UTR5 | MYO1A   | 12 | 57443622/5744335<br>7                                                                 | 2 | cg09541248/cg22614<br>532                                                                    | 0.513802985 | 0.407921597 | 0.323402307 | -0.190400678 | 3.66E-11    | 2.07E-09    |
| UTR5 | MYOD1   | 11 | 17741243                                                                              | 1 | cg16519321                                                                                   | 0.279759915 | 0.339630044 | 0.473221386 | 0.193461471  | 6.49E-06    | 3.65E-05    |
| UTR5 | NAALAD2 | 11 | 89867819/8986791<br>1                                                                 | 2 | cg05500015/cg14304<br>817                                                                    | 0.282223865 | 0.356518817 | 0.438218755 | 0.15599489   | 0.001114024 | 0.003684506 |
| UTR5 | NCAM2   | 21 | 22370733/2237086<br>4/22370758                                                        | 3 | cg15681537/cg17475<br>987/cg25818292                                                         | 0.158762917 | 0.227909182 | 0.326792251 | 0.168029334  | 1.17E-05    | 6.18E-05    |
| UTR5 | NCAN    | 19 | 19323996/1932281<br>8/19327542/193233<br>30/19322902/19325<br>920                     | 6 | cg02918253/cg08249<br>988/cg13118849/cg1<br>5976079/cg17767542<br>/cg26856607                | 0.38890778  | 0.459038992 | 0.555911934 | 0.167004154  | 2.22E-08    | 2.58E-07    |
| UTR5 | NEFL    | 8  | 24814126/2481403<br>5                                                                 | 2 | cg22978087/cg24032<br>666                                                                    | 0.368008958 | 0.387229822 | 0.542913533 | 0.174904575  | 2.80E-05    | 0.000135081 |
| UTR5 | NEFM    | 8  | 24773148/2477287<br>8/24773060/247712<br>73/24772513                                  | 5 | cg01583969/cg02002<br>551/cg12026749/cg1<br>8267374/cg26980244                               | 0.38603517  | 0.488248139 | 0.589292386 | 0.203257216  | 2.45E-07    | 2.07E-06    |
| UTR5 | NELL1   | 11 | 20691161/2069118<br>0/20691126                                                        | 3 | cg14689623/cg20113<br>732/cg23861668                                                         | 0.302093187 | 0.3874827   | 0.537339132 | 0.235245945  | 3.54E-07    | 2.87E-06    |
| UTR5 | NETO1   | 18 | 70534767/7053453<br>4                                                                 | 2 | cg18448581/cg26186<br>727                                                                    | 0.328851298 | 0.397823596 | 0.482569505 | 0.153718207  | 3.56E-10    | 9.49E-09    |



|      |         |    |                                                                                                                                                                 |    |                                                                                                                                                                                 |             |             |             |              |             |             |
|------|---------|----|-----------------------------------------------------------------------------------------------------------------------------------------------------------------|----|---------------------------------------------------------------------------------------------------------------------------------------------------------------------------------|-------------|-------------|-------------|--------------|-------------|-------------|
| UTR5 | NEUROD6 | 7  | 31379820/31380390                                                                                                                                               | 2  | cg25597535/cg26312920                                                                                                                                                           | 0.380424165 | 0.292083483 | 0.224579068 | -0.155845097 | 5.07E-10    | 1.20E-08    |
| UTR5 | NEUROG3 | 10 | 71333037/71332804                                                                                                                                               | 2  | cg03425110/cg17583413                                                                                                                                                           | 0.225495702 | 0.331307686 | 0.573642898 | 0.348147196  | 6.76E-10    | 1.50E-08    |
| UTR5 | NFAM1   | 22 | 42828386                                                                                                                                                        | 1  | cg03365751                                                                                                                                                                      | 0.54159879  | 0.634140517 | 0.700656695 | 0.159057905  | 2.06E-09    | 3.59E-08    |
| UTR5 | NGB     | 14 | 77737621/77737495                                                                                                                                               | 2  | cg02181639/cg02881570                                                                                                                                                           | 0.375804095 | 0.441153767 | 0.623488245 | 0.24768415   | 3.50E-07    | 2.84E-06    |
| UTR5 | NKX2-2  | 20 | 21494547                                                                                                                                                        | 1  | cg17029168                                                                                                                                                                      | 0.2650935   | 0.329316172 | 0.497733132 | 0.232639632  | 1.83E-05    | 9.27E-05    |
| UTR5 | NKX2-3  | 10 | 101292766                                                                                                                                                       | 1  | cg08287265                                                                                                                                                                      | 0.209799967 | 0.241813265 | 0.370159051 | 0.160359085  | 0.001187002 | 0.003909199 |
| UTR5 | NMBR    | 6  | 142409831                                                                                                                                                       | 1  | cg08109815                                                                                                                                                                      | 0.430450735 | 0.510800806 | 0.609909305 | 0.17945857   | 1.22E-11    | 1.12E-09    |
| UTR5 | NOS2    | 17 | 26127480/26127522/26127542/26127537/26127438                                                                                                                    | 5  | cg02196147/cg06301529/cg07150830/cg07704981/cg26853415                                                                                                                          | 0.531012951 | 0.422848119 | 0.331358986 | -0.199653965 | 1.43E-10    | 4.82E-09    |
| UTR5 | NOVA1   | 14 | 27066771                                                                                                                                                        | 1  | cg15602241                                                                                                                                                                      | 0.21546241  | 0.203697178 | 0.385430986 | 0.169968576  | 0.000721205 | 0.00249158  |
| UTR5 | NPAS4   | 11 | 66188522                                                                                                                                                        | 1  | cg14699728                                                                                                                                                                      | 0.61101075  | 0.731231661 | 0.824678177 | 0.213667427  | 1.72E-11    | 1.44E-09    |
| UTR5 | NPHS1   | 19 | 36342859                                                                                                                                                        | 1  | cg04941018                                                                                                                                                                      | 0.64290901  | 0.533100622 | 0.438364864 | -0.204544146 | 1.45E-09    | 2.71E-08    |
| UTR5 | NPR3    | 5  | 32711881                                                                                                                                                        | 1  | cg01252672                                                                                                                                                                      | 0.087079092 | 0.174021886 | 0.459977908 | 0.372898816  | 1.57E-06    | 1.04E-05    |
| UTR5 | NPY     | 7  | 24324570/24324435/24323939/24323840                                                                                                                             | 4  | cg11475550/cg12614105/cg21097881/cg25884711                                                                                                                                     | 0.288807862 | 0.444132025 | 0.564067368 | 0.275259506  | 3.62E-09    | 5.67E-08    |
| UTR5 | NR1I3   | 1  | 161206502/161207966                                                                                                                                             | 2  | cg17028814/cg25214346                                                                                                                                                           | 0.60810911  | 0.493879067 | 0.394479575 | -0.213629535 | 1.11E-10    | 4.03E-09    |
| UTR5 | NR2E1   | 6  | 108487388/108487506/108487903/108487820                                                                                                                         | 4  | cg02062480/cg03383382/cg06559274/cg19697981                                                                                                                                     | 0.240879177 | 0.25947047  | 0.396833913 | 0.155954736  | 2.00E-05    | 0.000100253 |
| UTR5 | NRG2    | 5  | 139422822/139422829                                                                                                                                             | 2  | cg02128325/cg02725413                                                                                                                                                           | 0.080611928 | 0.140070739 | 0.251405918 | 0.17079399   | 0.000972439 | 0.003261443 |
| UTR5 | NTF4    | 19 | 49566731                                                                                                                                                        | 1  | cg25937395                                                                                                                                                                      | 0.488421705 | 0.397439061 | 0.335996991 | -0.152424714 | 2.65E-11    | 1.77E-09    |
| UTR5 | NTNG1   | 1  | 107684059/107682963/107683725/107684339/107683187/107683775/107684425/107684255/107682798/107688142/107683715/107682674/107684751/107683532/107683677/107682818 | 16 | cg01559617/cg02361557/cg02636497/cg06368118/cg07005523/cg07155336/cg07470367/cg09508770/cg09822538/cg10887385/cg11396157/cg15128200/cg15697822/cg16136098/cg18200760/cg20170831 | 0.16137007  | 0.212047113 | 0.318257479 | 0.156887409  | 0.000432347 | 0.001575751 |
| UTR5 | NTRK3   | 15 | 88799523/88799526                                                                                                                                               | 2  | cg11525479/cg27034819                                                                                                                                                           | 0.074820707 | 0.151314393 | 0.25776619  | 0.182945484  | 2.58E-07    | 2.17E-06    |

|      |          |    |                                              |   |                                                        |             |             |             |              |             |             |
|------|----------|----|----------------------------------------------|---|--------------------------------------------------------|-------------|-------------|-------------|--------------|-------------|-------------|
| UTR5 | NTSR1    | 20 | 61340542/61340340                            | 2 | cg00254133/cg08678514                                  | 0.26435482  | 0.305493228 | 0.441554541 | 0.177199721  | 1.79E-05    | 9.08E-05    |
| UTR5 | NWD1     | 19 | 16844603/16830859                            | 2 | cg10589577/cg21035374                                  | 0.46745219  | 0.38020425  | 0.290009155 | -0.177443035 | 6.02E-10    | 1.38E-08    |
| UTR5 | NXPH1    | 7  | 8475198/8474544/8473990/8474830              | 4 | cg02124383/cg03099208/cg06444755/cg19469357            | 0.352218618 | 0.427701069 | 0.534196289 | 0.181977671  | 1.92E-07    | 1.68E-06    |
| UTR5 | ODF3     | 11 | 196824/197224                                | 2 | cg04874875/cg16225091                                  | 0.759704613 | 0.695349486 | 0.586404105 | -0.173300508 | 9.80E-07    | 6.91E-06    |
| UTR5 | OLIG2    | 21 | 34398532/34398263/34398849/34398265          | 4 | cg05724110/cg09793121/cg14843922/cg22869726            | 0.317999256 | 0.411034344 | 0.58256032  | 0.264561064  | 2.43E-09    | 4.12E-08    |
| UTR5 | OLIG3    | 6  | 137815333                                    | 1 | cg03889226                                             | 0.18031487  | 0.24152574  | 0.411535868 | 0.231220998  | 5.07E-06    | 2.93E-05    |
| UTR5 | OPCML    | 11 | 133402230/132812991/133402246                | 3 | cg03923934/cg09314708/cg19349861                       | 0.329729523 | 0.404297156 | 0.49141755  | 0.161688028  | 6.17E-06    | 3.48E-05    |
| UTR5 | OPRK1    | 8  | 54163693/54164161/54163622/54164051/54164081 | 5 | cg06808751/cg07303244/cg10095242/cg11701471/cg25990647 | 0.381651307 | 0.471933456 | 0.620641206 | 0.238989899  | 1.88E-09    | 3.32E-08    |
| UTR5 | OR2B3    | 6  | 29055042                                     | 1 | cg27458549                                             | 0.723920105 | 0.577724044 | 0.444687195 | -0.27923291  | 4.11E-09    | 6.34E-08    |
| UTR5 | OR5V1    | 6  | 29323978                                     | 1 | cg19323832                                             | 0.791713435 | 0.679382694 | 0.539983595 | -0.25172984  | 6.64E-06    | 3.72E-05    |
| UTR5 | OTP      | 5  | 76934461/76934501                            | 2 | cg21097283/cg24231716                                  | 0.199478577 | 0.271493168 | 0.380937562 | 0.181458985  | 6.10E-07    | 4.53E-06    |
| UTR5 | PABPC3   | 13 | 25670319/25670327                            | 2 | cg18474108/cg21341928                                  | 0.531042993 | 0.58932225  | 0.686503539 | 0.155460546  | 5.70E-09    | 8.31E-08    |
| UTR5 | PATE3    | 11 | 125658038                                    | 1 | cg09752271                                             | 0.421375365 | 0.327739161 | 0.242760424 | -0.178614941 | 6.08E-07    | 4.52E-06    |
| UTR5 | PAX4     | 7  | 127255636/127255591                          | 2 | cg20082779/cg20672477                                  | 0.489752483 | 0.415560414 | 0.330597914 | -0.159154569 | 2.61E-09    | 4.35E-08    |
| UTR5 | PAX7     | 1  | 18957632/18958084                            | 2 | cg11428724/cg13969001                                  | 0.182770352 | 0.194844565 | 0.339914824 | 0.157144472  | 0.003890899 | 0.011339086 |
| UTR5 | PCDH10   | 4  | 134070598/134070819                          | 2 | cg14410319/cg14795750                                  | 0.2297729   | 0.321316182 | 0.433004927 | 0.203232027  | 4.65E-07    | 3.58E-06    |
| UTR5 | PCDH17   | 13 | 58206058/58206036                            | 2 | cg00208153/cg14893163                                  | 0.31001712  | 0.411174189 | 0.570123352 | 0.260106232  | 6.67E-10    | 1.49E-08    |
| UTR5 | PCDH8    | 13 | 53422691                                     | 1 | cg27360326                                             | 0.40974839  | 0.4804092   | 0.591171164 | 0.181422774  | 7.41E-05    | 0.000325595 |
| UTR5 | PCDHA9   | 5  | 140227765                                    | 1 | cg11445191                                             | 0.54467526  | 0.461306417 | 0.347419155 | -0.197256105 | 3.44E-05    | 0.000163204 |
| UTR5 | PCDHB5   | 5  | 140514944/140514811/140514824                | 3 | cg18021368/cg19568544/cg24583624                       | 0.462452523 | 0.553871594 | 0.665145345 | 0.202692822  | 2.85E-09    | 4.65E-08    |
| UTR5 | PCDHGA11 | 5  | 140800586/140800629/140800761                | 3 | cg05870739/cg10679597/cg24954895                       | 0.41512593  | 0.572358914 | 0.715389425 | 0.300263495  | 1.72E-11    | 1.44E-09    |
| UTR5 | PCDHGA12 | 5  | 140810260/140810161                          | 2 | cg07802710/cg11647681                                  | 0.345940625 | 0.459376522 | 0.5954184   | 0.249477775  | 2.10E-08    | 2.46E-07    |
| UTR5 | PCDHGA2  | 5  | 140718405                                    | 1 | cg03617826                                             | 0.35435397  | 0.444526017 | 0.568896195 | 0.214542225  | 1.56E-07    | 1.40E-06    |

|      |          |    |                                                                |   |                                                                              |             |             |             |              |             |             |
|------|----------|----|----------------------------------------------------------------|---|------------------------------------------------------------------------------|-------------|-------------|-------------|--------------|-------------|-------------|
| UTR5 | PCDHGA8  | 5  | 140772256/140772286/140772182                                  | 3 | cg14458068/cg21117330/cg26811372                                             | 0.564974788 | 0.664611019 | 0.729108303 | 0.164133515  | 1.12E-07    | 1.06E-06    |
| UTR5 | PCDHGB7  | 5  | 140797286                                                      | 1 | cg23563234                                                                   | 0.48308974  | 0.586047222 | 0.681570527 | 0.198480787  | 6.83E-07    | 5.01E-06    |
| UTR5 | PCDHGC3  | 5  | 140855582                                                      | 1 | cg10858746                                                                   | 0.104250289 | 0.151458377 | 0.272282888 | 0.168032599  | 0.005111005 | 0.01447321  |
| UTR5 | PCK1     | 20 | 56136167                                                       | 1 | cg20605413                                                                   | 0.399125295 | 0.314853322 | 0.242899114 | -0.156226181 | 2.25E-10    | 6.80E-09    |
| UTR5 | PCOLCE   | 7  | 100200009/10019982/100199952/100200003                         | 4 | cg02797569/cg06402330/cg26777475/cg27069566                                  | 0.633549886 | 0.575186529 | 0.459504847 | -0.17404504  | 1.90E-08    | 2.24E-07    |
| UTR5 | PCP4L1   | 1  | 161228674                                                      | 1 | cg11912330                                                                   | 0.16781842  | 0.160256398 | 0.392305085 | 0.224486665  | 0.000207649 | 0.00082435  |
| UTR5 | PCSK2    | 20 | 17207697                                                       | 1 | cg27343616                                                                   | 0.308719235 | 0.355116233 | 0.475753955 | 0.16703472   | 5.03E-08    | 5.25E-07    |
| UTR5 | PDCD1LG2 | 9  | 5515324                                                        | 1 | cg14351952                                                                   | 0.812666195 | 0.682149372 | 0.589016491 | -0.223649704 | 7.47E-09    | 1.02E-07    |
| UTR5 | PDE1B    | 12 | 54955143/54943545/54943484                                     | 3 | cg01961252/cg15927682/cg24020814                                             | 0.248393013 | 0.331568553 | 0.422807558 | 0.174414545  | 8.91E-06    | 4.88E-05    |
| UTR5 | PDE4A    | 19 | 10531434                                                       | 1 | cg23103993                                                                   | 0.095087647 | 0.097623676 | 0.362455849 | 0.267368202  | 0.00012013  | 0.000503831 |
| UTR5 | PDGFD    | 11 | 104034754/104034982                                            | 2 | cg02120582/cg18403606                                                        | 0.049574196 | 0.177355176 | 0.363817949 | 0.314243754  | 8.35E-07    | 5.98E-06    |
| UTR5 | PENK     | 8  | 57358651/57358713/57359200/57359258/57358625/57358590/57358928 | 7 | cg03483150/cg04612444/cg06066137/cg10397440/cg18742346/cg21694941/cg24645221 | 0.405802708 | 0.492353038 | 0.610716113 | 0.204913405  | 1.93E-12    | 3.63E-10    |
| UTR5 | PEX5L    | 3  | 179754483                                                      | 1 | cg03175305                                                                   | 0.176515565 | 0.282426469 | 0.423390118 | 0.246874553  | 1.27E-07    | 1.17E-06    |
| UTR5 | PGLYRP1  | 19 | 46526321                                                       | 1 | cg14001023                                                                   | 0.593738825 | 0.692920044 | 0.795988614 | 0.202249789  | 2.86E-10    | 8.16E-09    |
| UTR5 | PHF21B   | 22 | 45405627/45405624/45405768/45405621                            | 4 | cg15679813/cg20495645/cg20525183/cg25976257                                  | 0.094925203 | 0.148587111 | 0.297336512 | 0.202411309  | 9.48E-06    | 5.14E-05    |
| UTR5 | PHGR1    | 15 | 40644728/40644696                                              | 2 | cg00114694/cg16058105                                                        | 0.508438575 | 0.392952178 | 0.299063073 | -0.209375502 | 2.30E-11    | 1.69E-09    |
| UTR5 | PHOX2A   | 11 | 71955113/71955164                                              | 2 | cg13103303/cg19651694                                                        | 0.364023335 | 0.428198539 | 0.596162923 | 0.232139588  | 3.48E-10    | 9.33E-09    |
| UTR5 | PI15     | 8  | 75737456                                                       | 1 | cg00128482                                                                   | 0.451085095 | 0.333594339 | 0.249696736 | -0.201388359 | 8.82E-09    | 1.19E-07    |
| UTR5 | PIK3R6   | 17 | 8762014/8770954/8770908                                        | 3 | cg00409104/cg09209669/cg24092340                                             | 0.414249083 | 0.299857572 | 0.223271247 | -0.190977836 | 9.26E-12    | 9.57E-10    |
| UTR5 | PLA1A    | 3  | 119316759                                                      | 1 | cg15362455                                                                   | 0.425528655 | 0.340435272 | 0.265920373 | -0.159608282 | 7.83E-11    | 3.23E-09    |
| UTR5 | PLA2G4F  | 15 | 42448786/42448760                                              | 2 | cg10917153/cg16920001                                                        | 0.482703    | 0.393574192 | 0.321426993 | -0.161276007 | 7.69E-11    | 3.22E-09    |
| UTR5 | PLCZ1    | 12 | 18890872/18890579                                              | 2 | cg06233731/cg25573386                                                        | 0.56617049  | 0.462223856 | 0.365700895 | -0.200469595 | 1.10E-09    | 2.19E-08    |
| UTR5 | PLEKHA4  | 19 | 49371285/49371079                                              | 2 | cg06339706/cg06705122                                                        | 0.613221388 | 0.533954208 | 0.430637975 | -0.182583413 | 8.84E-09    | 1.19E-07    |
| UTR5 | PLSCR5   | 3  | 146323078                                                      | 1 | cg22594071                                                                   | 0.469473455 | 0.390588256 | 0.302888591 | -0.166584864 | 9.13E-10    | 1.90E-08    |

|      |          |    |                                                                                           |    |                                                                                                               |             |             |             |              |             |             |
|------|----------|----|-------------------------------------------------------------------------------------------|----|---------------------------------------------------------------------------------------------------------------|-------------|-------------|-------------|--------------|-------------|-------------|
| UTR5 | PNLIPRP1 | 10 | 118350608                                                                                 | 1  | cg23148094                                                                                                    | 0.59423929  | 0.479172828 | 0.389032045 | -0.205207245 | 8.24E-11    | 3.31E-09    |
| UTR5 | POM121L2 | 6  | 27280010                                                                                  | 1  | cg07085962                                                                                                    | 0.085615451 | 0.126727028 | 0.278740917 | 0.193125467  | 0.000584613 | 0.002068657 |
| UTR5 | POU4F2   | 4  | 147560282/147560286/147560126                                                             | 3  | cg02610222/cg14631165/cg24199834                                                                              | 0.322328865 | 0.391729356 | 0.513645348 | 0.191316483  | 1.32E-10    | 4.53E-09    |
| UTR5 | POU4F3   | 5  | 145718669/145718597                                                                       | 2  | cg17871749/cg23303408                                                                                         | 0.331677935 | 0.393681303 | 0.499733048 | 0.168055113  | 1.26E-06    | 8.62E-06    |
| UTR5 | PPFIA4   | 1  | 203020566/203020617/203020660                                                             | 3  | cg00594917/cg10952234/cg24000087                                                                              | 0.729849245 | 0.657511617 | 0.57815983  | -0.151689415 | 1.56E-06    | 1.04E-05    |
| UTR5 | PPP1R16B | 20 | 37462474/37464179/37435477/37435204/37435716/37438823/37434409/37434552/37435119/37434950 | 10 | cg02811473/cg03288217/cg03563630/cg06733470/cg07906520/cg18674961/cg22128431/cg24834740/cg25433624/cg25932164 | 0.274278028 | 0.353648219 | 0.458385561 | 0.184107533  | 2.14E-06    | 1.37E-05    |
| UTR5 | PPP1R1B  | 17 | 37783488/37785426/37784895                                                                | 3  | cg10498434/cg18575532/cg21320242                                                                              | 0.626764635 | 0.5270592   | 0.408900736 | -0.217863899 | 9.83E-11    | 3.70E-09    |
| UTR5 | PPP2R2C  | 4  | 6473964                                                                                   | 1  | cg18013519                                                                                                    | 0.07588347  | 0.151003771 | 0.353179632 | 0.277296162  | 4.14E-06    | 2.45E-05    |
| UTR5 | PRDM11   | 11 | 45115584/45115819                                                                         | 2  | cg03470671/cg20227165                                                                                         | 0.7306028   | 0.644063231 | 0.521855536 | -0.208747264 | 2.90E-08    | 3.26E-07    |
| UTR5 | PRDM14   | 8  | 70982285/70983348/70983079/70983532/70982255/70983530/70982935/70982867                   | 8  | cg02919936/cg07719492/cg10457247/cg14928902/cg17450425/cg19363499/cg21135533/cg23758305                       | 0.226713718 | 0.269793244 | 0.399402039 | 0.172688321  | 0.000121324 | 0.000507981 |
| UTR5 | PRG2     | 11 | 57157508/57157607/57157632                                                                | 3  | cg04549076/cg08773180/cg12819873                                                                              | 0.648617448 | 0.560375756 | 0.48030543  | -0.168312018 | 5.23E-11    | 2.59E-09    |
| UTR5 | PRG4     | 1  | 186265765/186265423                                                                       | 2  | cg12626411/cg24669741                                                                                         | 0.49889375  | 0.420284861 | 0.317732418 | -0.181161332 | 2.71E-10    | 7.85E-09    |
| UTR5 | PRIMA1   | 14 | 94254351/94254726/94254586/94254131                                                       | 4  | cg06133145/cg10002178/cg20895877/cg23889730                                                                   | 0.349452212 | 0.421909473 | 0.624263842 | 0.27481163   | 1.32E-09    | 2.51E-08    |
| UTR5 | PRMT8    | 12 | 3600764/3600666                                                                           | 2  | cg11596580/cg23739862                                                                                         | 0.27294165  | 0.299425    | 0.423234441 | 0.150292791  | 4.65E-05    | 0.000213552 |
| UTR5 | PRND     | 20 | 4702581/4704964                                                                           | 2  | cg09906458/cg15795984                                                                                         | 0.57554116  | 0.446774367 | 0.330079114 | -0.245462046 | 1.90E-13    | 9.07E-11    |
| UTR5 | PROCA1   | 17 | 27038861/27038686                                                                         | 2  | cg02685896/cg24841318                                                                                         | 0.159798654 | 0.293014926 | 0.409614889 | 0.249816236  | 7.27E-07    | 5.30E-06    |
| UTR5 | PRSS27   | 16 | 2770211/2770429/2770336/2770298                                                           | 4  | cg01195196/cg05144884/cg12391048/cg16444062                                                                   | 0.74622224  | 0.619735257 | 0.552289117 | -0.193933123 | 2.05E-07    | 1.78E-06    |

|      |           |    |                                                                                                                                                                                                       |                                                                                                                                                                                                                                               |             |             |             |              |             |             |
|------|-----------|----|-------------------------------------------------------------------------------------------------------------------------------------------------------------------------------------------------------|-----------------------------------------------------------------------------------------------------------------------------------------------------------------------------------------------------------------------------------------------|-------------|-------------|-------------|--------------|-------------|-------------|
| UTR5 | PRSS35    | 6  | 84227227/8423224<br>1/84222360/842325 5<br>99/84222308                                                                                                                                                | cg06032735/cg09115<br>026/cg15269863/cg1<br>6162611/cg26156382                                                                                                                                                                                | 0.510103054 | 0.422760453 | 0.356038143 | -0.154064911 | 3.47E-11    | 2.03E-09    |
| UTR5 | PTGFR     | 1  | 78957253/7895751<br>5/78956905/789568<br>45/78957682/78957<br>203/78956847                                                                                                                            | cg00701741/cg02859<br>837/cg03495868/cg0<br>3949391/cg19403909<br>/cg24924936/cg2704<br>6936                                                                                                                                                  | 0.406667808 | 0.473427984 | 0.594946235 | 0.188278427  | 2.11E-10    | 6.49E-09    |
| UTR5 | PVRL4     | 1  | 161059267/161059<br>327                                                                                                                                                                               | cg10841756/cg22585<br>988                                                                                                                                                                                                                     | 0.561919435 | 0.461592733 | 0.371334232 | -0.190585203 | 8.87E-11    | 3.46E-09    |
| UTR5 | QRFPR     | 4  | 122302007/122301<br>996/122301816                                                                                                                                                                     | cg00015770/cg14012<br>124/cg16326674                                                                                                                                                                                                          | 0.311049757 | 0.38931335  | 0.538028636 | 0.226978879  | 3.89E-07    | 3.10E-06    |
| UTR5 | RAB11FIP3 | 16 | 475948/524857                                                                                                                                                                                         | cg05098233/cg07740<br>599                                                                                                                                                                                                                     | 0.558404785 | 0.414761883 | 0.311925982 | -0.246478803 | 2.49E-11    | 1.71E-09    |
| UTR5 | RAB17     | 2  | 238499464                                                                                                                                                                                             | cg01157280                                                                                                                                                                                                                                    | 0.594524595 | 0.492280311 | 0.398829073 | -0.195695522 | 3.57E-10    | 9.49E-09    |
| UTR5 | RAB25     | 1  | 156031182                                                                                                                                                                                             | cg19580810                                                                                                                                                                                                                                    | 0.566289525 | 0.4548067   | 0.357817941 | -0.208471584 | 2.48E-10    | 7.30E-09    |
| UTR5 | RAB34     | 17 | 27044745/2704432<br>2/27044685/270446<br>29                                                                                                                                                           | cg02530437/cg12873<br>610/cg18686527/cg2<br>1816330                                                                                                                                                                                           | 0.40829401  | 0.526384144 | 0.650034676 | 0.241740666  | 5.93E-11    | 2.79E-09    |
| UTR5 | RAB37     | 17 | 72667394/7273296<br>4/72667378/726677<br>09                                                                                                                                                           | cg03932361/cg10817<br>887/cg12448933/cg1<br>6347279                                                                                                                                                                                           | 0.332886797 | 0.389007527 | 0.490841823 | 0.157955025  | 5.76E-10    | 1.33E-08    |
| UTR5 | RAB6C     | 2  | 130737494/130737<br>664                                                                                                                                                                               | cg06288154/cg09676<br>860                                                                                                                                                                                                                     | 0.28602157  | 0.337789244 | 0.468909518 | 0.182887948  | 4.89E-10    | 1.18E-08    |
| UTR5 | RALYL     | 8  | 85096037/8526709<br>4/85096835/850970<br>56/85095498/85097<br>429/85178030/8509<br>7246/85129152/850<br>97157/85165845/85<br>097031/85096015/8<br>5096868/85097049/<br>85095654/8509719<br>5/85095697 | cg00034076/cg00431<br>317/cg01538821/cg0<br>4842146/cg05716166<br>/cg14153637/cg1676<br>9791/cg17215863/cg<br>17822502/cg1801619<br>4/cg21163701/cg216<br>71806/cg22403811/c<br>g23458558/cg236497<br>08/cg23777958/cg25<br>757598/cg26669044 | 0.426563578 | 0.440956065 | 0.57732122  | 0.150757642  | 6.18E-07    | 4.58E-06    |
| UTR5 | RAPSN     | 11 | 47470633/4747067<br>4                                                                                                                                                                                 | cg01947936/cg15679<br>098                                                                                                                                                                                                                     | 0.77149761  | 0.72687405  | 0.617255845 | -0.154241765 | 1.52E-05    | 7.83E-05    |
| UTR5 | RAX       | 18 | 56940463                                                                                                                                                                                              | cg05945059                                                                                                                                                                                                                                    | 0.46560232  | 0.527555411 | 0.639636873 | 0.174034553  | 1.37E-09    | 2.58E-08    |
| UTR5 | RBP1      | 3  | 139258658                                                                                                                                                                                             | cg06208339                                                                                                                                                                                                                                    | 0.123450014 | 0.144507533 | 0.277254184 | 0.15380417   | 0.002334998 | 0.007150824 |
| UTR5 | RCSD1     | 1  | 167599527/167599<br>631                                                                                                                                                                               | cg00450304/cg02079<br>933                                                                                                                                                                                                                     | 0.026154343 | 0.066027011 | 0.212225592 | 0.186071249  | 0.00069075  | 0.002397047 |

|      |        |    |                                                                                                                                                                                     |    |                                                                                                                                                                                                                             |             |             |             |              |             |             |
|------|--------|----|-------------------------------------------------------------------------------------------------------------------------------------------------------------------------------------|----|-----------------------------------------------------------------------------------------------------------------------------------------------------------------------------------------------------------------------------|-------------|-------------|-------------|--------------|-------------|-------------|
| UTR5 | RDH5   | 12 | 56114155/56114269                                                                                                                                                                   | 2  | cg02192520/cg17243643                                                                                                                                                                                                       | 0.52343967  | 0.430334986 | 0.336311564 | -0.187128106 | 9.38E-10    | 1.95E-08    |
| UTR5 | REP15  | 12 | 27849452                                                                                                                                                                            | 1  | cg07809176                                                                                                                                                                                                                  | 0.483809695 | 0.390924644 | 0.323047568 | -0.160762127 | 3.58E-08    | 3.92E-07    |
| UTR5 | RERG   | 12 | 15374175/15371727/15373987/15374303                                                                                                                                                 | 4  | cg08830758/cg12642725/cg19205533/cg24979348                                                                                                                                                                                 | 0.301404652 | 0.3551473   | 0.462855066 | 0.161450414  | 0.000119835 | 0.000502765 |
| UTR5 | RIC3   | 11 | 8190565/8190572                                                                                                                                                                     | 2  | cg08383315/cg25778535                                                                                                                                                                                                       | 0.300068005 | 0.452253319 | 0.576551684 | 0.276483679  | 7.12E-11    | 3.17E-09    |
| UTR5 | RICS   | 11 | 128893940/128893851                                                                                                                                                                 | 2  | cg03231860/cg20892287                                                                                                                                                                                                       | 0.463703378 | 0.359730039 | 0.284669923 | -0.179033455 | 3.32E-11    | 2.01E-09    |
| UTR5 | RLBP1  | 15 | 89764836/89764895                                                                                                                                                                   | 2  | cg10173075/cg15808008                                                                                                                                                                                                       | 0.640042538 | 0.455113978 | 0.3678254   | -0.272217138 | 2.52E-13    | 1.08E-10    |
| UTR5 | RNASE1 | 14 | 21270575/21270924/21270850/21270407/21271018                                                                                                                                        | 5  | cg05153345/cg05958352/cg08122234/cg13787135/cg18836485                                                                                                                                                                      | 0.552248462 | 0.451036064 | 0.35464128  | -0.197607182 | 2.73E-10    | 7.88E-09    |
| UTR5 | RNF150 | 4  | 142054417/142054329/142054254/142054446/142053970                                                                                                                                   | 5  | cg03563667/cg06340552/cg18120376/cg20599022/cg24053721                                                                                                                                                                      | 0.144494352 | 0.226072682 | 0.346786786 | 0.202292435  | 0.000279212 | 0.001070758 |
| UTR5 | RNF175 | 4  | 154681066/154681197/154681323/154681128                                                                                                                                             | 4  | cg01440841/cg02647878/cg08660876/cg18355902                                                                                                                                                                                 | 0.295499914 | 0.337412067 | 0.46049854  | 0.164998626  | 0.000599655 | 0.002112961 |
| UTR5 | RNF186 | 1  | 20141662                                                                                                                                                                            | 1  | cg04994456                                                                                                                                                                                                                  | 0.51651407  | 0.408298611 | 0.333090264 | -0.183423806 | 4.56E-10    | 1.12E-08    |
| UTR5 | RNF220 | 1  | 44872463/44871429/44870976/44873692/44871606/44873064/44873592/44874524/44871634/44873229/44872075/44873057/44874649/44877749/44872502/44871099/44874576/44871297/44871156/44872657 | 20 | cg00023154/cg00825951/cg01267315/cg01422881/cg03946896/cg04023150/cg04541474/cg05597624/cg06550214/cg10224098/cg13675568/cg14403130/cg15590950/cg15830864/cg16822216/cg17243637/cg19719902/cg24515341/cg26035323/cg26341102 | 0.204029068 | 0.268822602 | 0.362602666 | 0.158573598  | 3.57E-09    | 5.61E-08    |
| UTR5 | RNF43  | 17 | 56493260/56494554                                                                                                                                                                   | 2  | cg14398214/cg24835159                                                                                                                                                                                                       | 0.481662105 | 0.379250986 | 0.29474697  | -0.186915135 | 8.94E-11    | 3.48E-09    |
| UTR5 | RSPO2  | 8  | 109095568/10909572/109094880/109095264/109095782/109095388                                                                                                                          | 6  | cg00910695/cg04050867/cg07390122/cg14070647/cg14733048/cg20061155                                                                                                                                                           | 0.274606971 | 0.358213946 | 0.512446105 | 0.237839134  | 2.13E-08    | 2.49E-07    |

|      |         |    |                                                                                                                         |    |                                                                                                                                       |             |             |             |              |             |             |
|------|---------|----|-------------------------------------------------------------------------------------------------------------------------|----|---------------------------------------------------------------------------------------------------------------------------------------|-------------|-------------|-------------|--------------|-------------|-------------|
| UTR5 | RSPO3   | 6  | 127440104                                                                                                               | 1  | cg09979256                                                                                                                            | 0.094536832 | 0.195482422 | 0.362228321 | 0.26769149   | 2.01E-05    | 0.0001005   |
| UTR5 | RSPO4   | 20 | 982831                                                                                                                  | 1  | cg01188592                                                                                                                            | 0.303446555 | 0.340147172 | 0.454667214 | 0.151220659  | 0.000408172 | 0.001495715 |
| UTR5 | RXFP3   | 5  | 33936752/3393652<br>0/33936597                                                                                          | 3  | cg02341815/cg02640<br>041/cg03909500                                                                                                  | 0.351970218 | 0.438276889 | 0.550538432 | 0.198568213  | 1.41E-07    | 1.29E-06    |
| UTR5 | RXRG    | 1  | 165414189/165414<br>332/165414379                                                                                       | 3  | cg00349776/cg08905<br>496/cg10364513                                                                                                  | 0.201971838 | 0.243573256 | 0.353013446 | 0.151041608  | 0.001049961 | 0.003490304 |
| UTR5 | RYR1    | 19 | 38924347/3892434<br>9/38924436                                                                                          | 3  | cg04571321/cg05471<br>297/cg06740600                                                                                                  | 0.19628607  | 0.287594851 | 0.464376086 | 0.268090016  | 1.11E-05    | 5.91E-05    |
| UTR5 | S100A14 | 1  | 153588782                                                                                                               | 1  | cg25433648                                                                                                                            | 0.517648555 | 0.412206472 | 0.3245839   | -0.193064655 | 9.46E-11    | 3.66E-09    |
| UTR5 | S100A16 | 1  | 153581750/153581<br>494/153581535/153<br>581793/153581655/<br>153584920                                                 | 6  | cg04990202/cg07910<br>075/cg11820824/cg1<br>8859033/cg19255608<br>/cg23499956                                                         | 0.430958912 | 0.349746561 | 0.274321637 | -0.156637274 | 1.74E-09    | 3.13E-08    |
| UTR5 | S100A7  | 1  | 153432128/153432<br>054                                                                                                 | 2  | cg02892624/cg17421<br>062                                                                                                             | 0.527180345 | 0.421562317 | 0.323614475 | -0.20356587  | 3.42E-11    | 2.03E-09    |
| UTR5 | S100A7A | 1  | 153389957/153389<br>629                                                                                                 | 2  | cg11790580/cg24255<br>159                                                                                                             | 0.558100615 | 0.449242547 | 0.323893911 | -0.234206704 | 2.71E-12    | 4.68E-10    |
| UTR5 | S100P   | 4  | 6695614                                                                                                                 | 1  | cg26233331                                                                                                                            | 0.376429735 | 0.286374472 | 0.222196445 | -0.15423329  | 7.80E-11    | 3.23E-09    |
| UTR5 | S1PR1   | 1  | 101702519/101702<br>744/101704473/101<br>704504/101703628/<br>101703749/101702<br>602/101704441/101<br>702782/101702689 | 10 | cg04156369/cg05053<br>688/cg07400091/cg1<br>0020333/cg10210739<br>/cg17859448/cg1832<br>3466/cg18757941/cg<br>20166532/cg2138504<br>7 | 0.119261569 | 0.172882457 | 0.29512414  | 0.175862572  | 1.46E-05    | 7.56E-05    |
| UTR5 | SAA4    | 11 | 18258153/1825805<br>5/18258323                                                                                          | 3  | cg04334121/cg22288<br>982/cg22587758                                                                                                  | 0.612559677 | 0.52097017  | 0.442492719 | -0.170066957 | 2.74E-14    | 3.93E-11    |
| UTR5 | SALL1   | 16 | 51184392/5118398<br>8/51183533/511805<br>21/51184355/51184<br>379/51184205/5118<br>3473/51183363/511<br>84152           | 10 | cg00582524/cg02288<br>754/cg02417084/cg0<br>3961481/cg04550052<br>/cg04698114/cg0484<br>4564/cg08199953/cg<br>08878368/cg1029747<br>3 | 0.339892097 | 0.439168399 | 0.539588305 | 0.199696208  | 1.39E-07    | 1.27E-06    |
| UTR5 | SAMD3   | 6  | 130537970/130543<br>838                                                                                                 | 2  | cg09345868/cg11249<br>120                                                                                                             | 0.85004046  | 0.761382511 | 0.63501365  | -0.21502681  | 2.17E-06    | 1.39E-05    |
| UTR5 | SAMD4A  | 14 | 55222988/5522675<br>5                                                                                                   | 2  | cg13994599/cg21554<br>616                                                                                                             | 0.603148065 | 0.55176655  | 0.4454153   | -0.157732765 | 5.82E-07    | 4.36E-06    |
| UTR5 | SCEL    | 13 | 78125149                                                                                                                | 1  | cg13446874                                                                                                                            | 0.7497091   | 0.664911083 | 0.591769614 | -0.157939486 | 6.88E-07    | 5.04E-06    |
| UTR5 | SCGB1D1 | 11 | 61957732                                                                                                                | 1  | cg07532354                                                                                                                            | 0.46097693  | 0.372608122 | 0.283897536 | -0.177079394 | 6.07E-10    | 1.39E-08    |
| UTR5 | SCGB2A1 | 11 | 61976195/6197617<br>4                                                                                                   | 2  | cg06334737/cg16986<br>846                                                                                                             | 0.56752183  | 0.431454211 | 0.326036145 | -0.241485685 | 5.46E-11    | 2.67E-09    |

|      |           |    |                                                                                                                         |    |                                                                                                                                                                      |             |             |             |              |             |             |
|------|-----------|----|-------------------------------------------------------------------------------------------------------------------------|----|----------------------------------------------------------------------------------------------------------------------------------------------------------------------|-------------|-------------|-------------|--------------|-------------|-------------|
| UTR5 | SCGB2A2   | 11 | 62037659                                                                                                                | 1  | cg22862656                                                                                                                                                           | 0.81272038  | 0.609554289 | 0.447701014 | -0.365019366 | 1.48E-11    | 1.29E-09    |
| UTR5 | SCN2B     | 11 | 118047203                                                                                                               | 1  | cg10513118                                                                                                                                                           | 0.491962675 | 0.402305178 | 0.320984305 | -0.17097837  | 4.66E-08    | 4.92E-07    |
| UTR5 | SCTR      | 2  | 120281999/120281813                                                                                                     | 2  | cg07176264/cg20505223                                                                                                                                                | 0.287517405 | 0.314268917 | 0.480911932 | 0.193394527  | 4.00E-05    | 0.000186988 |
| UTR5 | SDC2      | 8  | 97506180/97506251                                                                                                       | 2  | cg14538332/cg16935295                                                                                                                                                | 0.12978423  | 0.237232389 | 0.44108355  | 0.31129932   | 3.81E-06    | 2.28E-05    |
| UTR5 | SEC31B    | 10 | 102279330/102278918/102279373/102279455                                                                                 | 4  | cg01072942/cg02593403/cg20831708/cg26381313                                                                                                                          | 0.41692605  | 0.507569263 | 0.603449915 | 0.186523865  | 1.09E-09    | 2.17E-08    |
| UTR5 | SELENBP1  | 1  | 151345123                                                                                                               | 1  | cg24480379                                                                                                                                                           | 0.490887215 | 0.421913322 | 0.335055195 | -0.15583202  | 1.12E-08    | 1.45E-07    |
| UTR5 | SERINC4   | 15 | 44092166                                                                                                                | 1  | cg02556940                                                                                                                                                           | 0.86925858  | 0.809470183 | 0.6736888   | -0.19556978  | 1.03E-05    | 5.54E-05    |
| UTR5 | SERPINB11 | 18 | 61375622                                                                                                                | 1  | cg17192315                                                                                                                                                           | 0.679125675 | 0.548245278 | 0.4215508   | -0.257574875 | 2.71E-08    | 3.07E-07    |
| UTR5 | SERPINB2  | 18 | 61557735/61557687                                                                                                       | 2  | cg20875821/cg23582644                                                                                                                                                | 0.56843992  | 0.429821339 | 0.336689211 | -0.231750709 | 2.78E-12    | 4.70E-10    |
| UTR5 | SERPINB5  | 18 | 61144250/61144339/61144177/61144150                                                                                     | 4  | cg08411049/cg15422147/cg20837735/cg21807034                                                                                                                          | 0.514257392 | 0.4132338   | 0.328815711 | -0.185441681 | 1.06E-09    | 2.12E-08    |
| UTR5 | SFMBT2    | 10 | 7452391/7446012/7451314/7451838/7452950/7450456/7451376/7453329/7452815/7450355/7449665/7448857/7451822/7452242/7452598 | 15 | cg01056653/cg02980650/cg09060610/cg12328063/cg12767281/cg15248577/cg20299663/cg20506184/cg20506550/cg22862480/cg22881174/cg24020806/cg25291138/cg26076412/cg26878816 | 0.267518479 | 0.38926313  | 0.529735242 | 0.262216762  | 3.69E-07    | 2.96E-06    |
| UTR5 | SFN       | 1  | 27189679/27189648                                                                                                       | 2  | cg13466284/cg17330303                                                                                                                                                | 0.55060472  | 0.469117461 | 0.397089241 | -0.153515479 | 1.54E-09    | 2.85E-08    |
| UTR5 | SFTA3     | 14 | 36982649/36982447                                                                                                       | 2  | cg01611862/cg04926361                                                                                                                                                | 0.306812683 | 0.387726467 | 0.485149523 | 0.17833684   | 1.33E-07    | 1.22E-06    |
| UTR5 | SGCE      | 7  | 94285501/94285520                                                                                                       | 2  | cg04366249/cg14388858                                                                                                                                                | 0.168816405 | 0.201851454 | 0.330592637 | 0.161776232  | 0.001810142 | 0.005708343 |
| UTR5 | SGCZ      | 8  | 15095163                                                                                                                | 1  | cg16266667                                                                                                                                                           | 0.35641897  | 0.505215806 | 0.654992595 | 0.298573625  | 4.45E-09    | 6.80E-08    |
| UTR5 | SH2D4B    | 10 | 82297793/82300600/82297920/82300588                                                                                     | 4  | cg08772206/cg10374402/cg10859151/cg22633936                                                                                                                          | 0.667622097 | 0.592609963 | 0.515918545 | -0.151703551 | 1.91E-11    | 1.55E-09    |
| UTR5 | SH3GL3    | 15 | 84116151/84116115/84116107                                                                                              | 3  | cg09201151/cg21145136/cg22946150                                                                                                                                     | 0.231795257 | 0.242610657 | 0.400988149 | 0.169192892  | 0.002187862 | 0.006745183 |
| UTR5 | SHC3      | 9  | 91793648                                                                                                                | 1  | cg13351583                                                                                                                                                           | 0.24135894  | 0.329513467 | 0.48266265  | 0.24130371   | 3.52E-05    | 0.000166488 |
| UTR5 | SHISA9    | 16 | 12995568/12995603                                                                                                       | 2  | cg02482218/cg04106647                                                                                                                                                | 0.223821843 | 0.279243776 | 0.446874112 | 0.223052269  | 1.00E-05    | 5.38E-05    |
| UTR5 | SIGLEC12  | 19 | 52004992                                                                                                                | 1  | cg27086014                                                                                                                                                           | 0.48186367  | 0.415249422 | 0.329431645 | -0.152432025 | 3.37E-06    | 2.05E-05    |



|      |          |    |                                                                                                    |    |                                                                                                                          |             |             |             |              |          |             |
|------|----------|----|----------------------------------------------------------------------------------------------------|----|--------------------------------------------------------------------------------------------------------------------------|-------------|-------------|-------------|--------------|----------|-------------|
| UTR5 | SIM1     | 6  | 100911526/100911550                                                                                | 2  | cg12865837/cg24592906                                                                                                    | 0.328473495 | 0.406196656 | 0.5159396   | 0.187466105  | 2.70E-07 | 2.26E-06    |
| UTR5 | SIRPG    | 20 | 1638393                                                                                            | 1  | cg15722679                                                                                                               | 0.39737777  | 0.292677606 | 0.216841866 | -0.180535904 | 4.52E-07 | 3.50E-06    |
| UTR5 | SIX6     | 14 | 60975964/60976115                                                                                  | 2  | cg06785999/cg14186066                                                                                                    | 0.393968125 | 0.517370867 | 0.66005525  | 0.266087125  | 1.07E-10 | 3.93E-09    |
| UTR5 | SLC11A1  | 2  | 219246985/219247055                                                                                | 2  | cg05007997/cg18854666                                                                                                    | 0.626903165 | 0.502097061 | 0.37951783  | -0.247385335 | 9.88E-11 | 3.70E-09    |
| UTR5 | SLC12A5  | 20 | 44657838/44657948/44650380                                                                         | 3  | cg10439765/cg22752533/cg23720732                                                                                         | 0.339649725 | 0.428707452 | 0.522097081 | 0.182447356  | 6.88E-08 | 6.93E-07    |
| UTR5 | SLC13A5  | 17 | 6616653                                                                                            | 1  | cg16652063                                                                                                               | 0.406413895 | 0.545217111 | 0.646828482 | 0.240414587  | 1.23E-08 | 1.56E-07    |
| UTR5 | SLC16A4  | 1  | 110933248/110933345                                                                                | 2  | cg09494546/cg25320780                                                                                                    | 0.696382015 | 0.540663081 | 0.445331232 | -0.251050783 | 1.45E-10 | 4.84E-09    |
| UTR5 | SLC18A2  | 10 | 119000991/119000927/119001066                                                                      | 3  | cg00512279/cg08521987/cg19721867                                                                                         | 0.234134234 | 0.306309958 | 0.424603072 | 0.190468838  | 7.65E-05 | 0.000334991 |
| UTR5 | SLC18A3  | 10 | 50818652/50818707                                                                                  | 2  | cg16494192/cg24109980                                                                                                    | 0.36460248  | 0.436509039 | 0.568479809 | 0.203877329  | 8.45E-07 | 6.04E-06    |
| UTR5 | SLC22A10 | 11 | 63057478/63057592                                                                                  | 2  | cg01306183/cg16351441                                                                                                    | 0.60468788  | 0.479163578 | 0.355024259 | -0.249663621 | 3.71E-10 | 9.72E-09    |
| UTR5 | SLC22A16 | 6  | 110797797                                                                                          | 1  | cg05415020                                                                                                               | 0.42231626  | 0.479833089 | 0.615592823 | 0.193276563  | 9.92E-09 | 1.30E-07    |
| UTR5 | SLC22A24 | 11 | 62911616                                                                                           | 1  | cg16950247                                                                                                               | 0.52666063  | 0.380126061 | 0.307141736 | -0.219518894 | 1.83E-13 | 9.06E-11    |
| UTR5 | SLC22A8  | 11 | 62783123/62783272/62782446                                                                         | 3  | cg06917325/cg22306408/cg24011351                                                                                         | 0.640748493 | 0.567121428 | 0.446527155 | -0.194221338 | 5.93E-08 | 6.08E-07    |
| UTR5 | SLC23A3  | 2  | 220034739                                                                                          | 1  | cg15797218                                                                                                               | 0.56123755  | 0.462417461 | 0.394757336 | -0.166480214 | 3.45E-11 | 2.03E-09    |
| UTR5 | SLC24A4  | 14 | 92788960/92790097/92790580/92789193/92790364/92790798/92790711/92790285/92789092/92789500/92790072 | 11 | cg01064918/cg01802258/cg04556542/cg04880732/cg07285995/cg10113212/cg11294692/cg18229521/cg18587837/cg22138430/cg24766334 | 0.23921772  | 0.317027636 | 0.398084526 | 0.158866806  | 5.60E-07 | 4.21E-06    |
| UTR5 | SLC25A34 | 1  | 16062915/16062894                                                                                  | 2  | cg03970032/cg15616400                                                                                                    | 0.583427555 | 0.495090472 | 0.428497568 | -0.154929987 | 7.76E-11 | 3.23E-09    |
| UTR5 | SLC26A9  | 1  | 205897159/205906409/205909935/205897165                                                            | 4  | cg06437052/cg11335179/cg16003790/cg22863880                                                                              | 0.667467823 | 0.586239322 | 0.508433944 | -0.159033878 | 3.81E-09 | 5.93E-08    |
| UTR5 | SLC27A6  | 5  | 128301328/128301232/128301230/128301488                                                            | 4  | cg02841155/cg07103493/cg17391928/cg25555059                                                                              | 0.405231333 | 0.465439279 | 0.578193858 | 0.172962525  | 6.52E-07 | 4.80E-06    |
| UTR5 | SLC32A1  | 20 | 37353117/37353158/37353126                                                                         | 3  | cg08313939/cg10216615/cg24454144                                                                                         | 0.250015918 | 0.34512885  | 0.489483206 | 0.239467288  | 2.72E-11 | 1.81E-09    |
| UTR5 | SLC35F1  | 6  | 118228869/118228871                                                                                | 2  | cg11430157/cg26532358                                                                                                    | 0.100903596 | 0.172972118 | 0.269015835 | 0.168112239  | 1.81E-05 | 9.19E-05    |

|      |         |    |                                                                                                                               |    |                                                                                                                                                           |             |             |             |              |          |             |
|------|---------|----|-------------------------------------------------------------------------------------------------------------------------------|----|-----------------------------------------------------------------------------------------------------------------------------------------------------------|-------------|-------------|-------------|--------------|----------|-------------|
| UTR5 | SLC35F3 | 1  | 234040765/234040781                                                                                                           | 2  | cg05051043/cg09424759                                                                                                                                     | 0.30379271  | 0.357964728 | 0.510501209 | 0.206708499  | 1.30E-06 | 8.84E-06    |
| UTR5 | SLC36A2 | 5  | 150727045                                                                                                                     | 1  | cg19562321                                                                                                                                                | 0.47641976  | 0.321748678 | 0.196324459 | -0.280095301 | 1.44E-14 | 3.57E-11    |
| UTR5 | SLC36A3 | 5  | 150683039/150683178                                                                                                           | 2  | cg00109131/cg22445920                                                                                                                                     | 0.750848095 | 0.711970936 | 0.588135614 | -0.162712481 | 1.18E-07 | 1.10E-06    |
| UTR5 | SLC39A4 | 8  | 145642243/145641882                                                                                                           | 2  | cg06700234/cg22059438                                                                                                                                     | 0.54565889  | 0.434823242 | 0.340892114 | -0.204766776 | 2.90E-11 | 1.87E-09    |
| UTR5 | SLC39A5 | 12 | 56624552/56623826/56623942                                                                                                    | 3  | cg00668685/cg08214142/cg12745325                                                                                                                          | 0.482296458 | 0.380748719 | 0.313085075 | -0.169211383 | 5.42E-12 | 6.79E-10    |
| UTR5 | SLC44A5 | 1  | 76076088/76053565                                                                                                             | 2  | cg15977773/cg17868936                                                                                                                                     | 0.582668055 | 0.55741365  | 0.432408841 | -0.150259214 | 5.63E-07 | 4.23E-06    |
| UTR5 | SLC4A1  | 17 | 42344234/42345488/42345478                                                                                                    | 3  | cg02998129/cg03580247/cg16063416                                                                                                                          | 0.768574982 | 0.663660937 | 0.539253386 | -0.229321595 | 1.87E-10 | 5.82E-09    |
| UTR5 | SLC5A1  | 22 | 32439052/32439254/32439259                                                                                                    | 3  | cg03604322/cg03962522/cg09547224                                                                                                                          | 0.427942595 | 0.368783344 | 0.251296545 | -0.17664605  | 1.57E-06 | 1.04E-05    |
| UTR5 | SLC5A11 | 16 | 24864984/24857601/24865363/24857579/24862006                                                                                  | 5  | cg04022912/cg04756594/cg06028605/cg23280807/cg26870567                                                                                                    | 0.516950245 | 0.421185069 | 0.346774797 | -0.170175448 | 2.15E-10 | 6.59E-09    |
| UTR5 | SLC6A17 | 1  | 110693985/110697298/110694747/110693757/110693237/110693612/110694263                                                         | 7  | cg01791587/cg05348973/cg05783233/cg05949020/cg11885396/cg13048512/cg15374686                                                                              | 0.304254397 | 0.390263773 | 0.532612144 | 0.228357747  | 2.61E-09 | 4.35E-08    |
| UTR5 | SLC6A2  | 16 | 55690564                                                                                                                      | 1  | cg04490714                                                                                                                                                | 0.321060065 | 0.374514678 | 0.499764455 | 0.17870439   | 1.23E-05 | 6.49E-05    |
| UTR5 | SLC8A3  | 14 | 70653919/70654290/70654639/70655686/70653719/70654824/70654597/70536311/70546695/70654247/70655056/70655382/70652710/70653964 | 14 | cg00890485/cg01646639/cg04140862/cg05203877/cg10848272/cg12858895/cg13652513/cg15971826/cg16799926/cg19545232/cg20267521/cg20409590/cg22823236/cg23241781 | 0.288400506 | 0.360642314 | 0.460250721 | 0.171850215  | 1.21E-06 | 8.32E-06    |
| UTR5 | SLC9A11 | 1  | 173571308/173571345/173572181                                                                                                 | 3  | cg02890044/cg15975283/cg25096142                                                                                                                          | 0.790686825 | 0.674756647 | 0.601773645 | -0.18891318  | 5.56E-09 | 8.15E-08    |
| UTR5 | SLFN11  | 17 | 33698288/33700513/33700230/33700295/33700255/33700180                                                                         | 6  | cg01723139/cg05504685/cg08764758/cg12581244/cg18411103/cg25054416                                                                                         | 0.365546976 | 0.434115784 | 0.515931222 | 0.150384246  | 4.61E-07 | 3.56E-06    |
| UTR5 | SLIT1   | 10 | 98945465/98945664                                                                                                             | 2  | cg02741216/cg13196826                                                                                                                                     | 0.077506079 | 0.132029509 | 0.305303885 | 0.227797806  | 9.23E-05 | 0.000396439 |

|      |         |    |                                                                                         |   |                                                                                                         |             |             |             |              |             |             |
|------|---------|----|-----------------------------------------------------------------------------------------|---|---------------------------------------------------------------------------------------------------------|-------------|-------------|-------------|--------------|-------------|-------------|
| UTR5 | SLIT2   | 4  | 20255264/2025534<br>3                                                                   | 2 | cg03742003/cg08428<br>452                                                                               | 0.257782725 | 0.366029311 | 0.529762009 | 0.271979284  | 1.72E-07    | 1.52E-06    |
| UTR5 | SLIT3   | 5  | 168727752/168728<br>081/168727762/168<br>728076                                         | 4 | cg01663016/cg07136<br>998/cg09073398/cg1<br>1732619                                                     | 0.318936618 | 0.409686742 | 0.554919341 | 0.235982722  | 1.46E-07    | 1.32E-06    |
| UTR5 | SLITRK1 | 13 | 84456486/8445612<br>7/84455742/844564<br>10/84456171/84456<br>308/84455651/8445<br>6258 | 8 | cg01729717/cg07104<br>706/cg10236414/cg1<br>8215217/cg19696317<br>/cg20312205/cg2205<br>7720/cg26998274 | 0.356682661 | 0.463665988 | 0.606855882 | 0.250173222  | 2.80E-12    | 4.70E-10    |
| UTR5 | SLITRK5 | 13 | 88326918/8832487<br>9/88325384/883267<br>52/88326244/88325<br>263/88326635              | 7 | cg04479219/cg06682<br>197/cg07710481/cg1<br>2271981/cg16821446<br>/cg19109538/cg1957<br>7779            | 0.225055161 | 0.301587606 | 0.457285961 | 0.2322308    | 7.74E-08    | 7.69E-07    |
| UTR5 | SLMAP   | 3  | 57743377                                                                                | 1 | cg15172734                                                                                              | 0.39085969  | 0.310144111 | 0.230296577 | -0.160563113 | 2.30E-07    | 1.97E-06    |
| UTR5 | SLN     | 11 | 107582734/107578<br>665/107579390/107<br>578793                                         | 4 | cg12237269/cg14434<br>149/cg21832801/cg2<br>7262398                                                     | 0.479840683 | 0.406178433 | 0.322702748 | -0.157137935 | 3.41E-09    | 5.42E-08    |
| UTR5 | SMAGP   | 12 | 51663310/5166348<br>4                                                                   | 2 | cg07663278/cg21513<br>385                                                                               | 0.418494155 | 0.319970672 | 0.2576271   | -0.160867055 | 5.94E-11    | 2.79E-09    |
| UTR5 | SMOC1   | 14 | 70346221/7034615<br>1                                                                   | 2 | cg15996043/cg18493<br>027                                                                               | 0.080132343 | 0.181771166 | 0.361537276 | 0.281404933  | 5.10E-06    | 2.94E-05    |
| UTR5 | SNAP91  | 6  | 84417933/8441865<br>9/84418789/844187<br>24/84418433                                    | 5 | cg07335294/cg15950<br>068/cg16334314/cg2<br>1688264/cg24190603                                          | 0.314300099 | 0.403981004 | 0.583119889 | 0.26881979   | 1.59E-10    | 5.16E-09    |
| UTR5 | SNCG    | 10 | 88718317/8871839<br>3                                                                   | 2 | cg03677069/cg21012<br>874                                                                               | 0.497614665 | 0.392017356 | 0.296029682 | -0.201584983 | 9.97E-11    | 3.73E-09    |
| UTR5 | SNTG2   | 2  | 946648                                                                                  | 1 | cg09426834                                                                                              | 0.305865165 | 0.362097389 | 0.540930227 | 0.235065062  | 1.41E-06    | 9.50E-06    |
| UTR5 | SORCS3  | 10 | 106400880                                                                               | 1 | cg16787600                                                                                              | 0.341068585 | 0.5001111   | 0.680446518 | 0.339377933  | 1.49E-10    | 4.94E-09    |
| UTR5 | SOX1    | 13 | 112721950                                                                               | 1 | cg16705627                                                                                              | 0.63466706  | 0.682100433 | 0.805633495 | 0.170966435  | 4.07E-09    | 6.30E-08    |
| UTR5 | SOX14   | 3  | 137483617                                                                               | 1 | cg06613095                                                                                              | 0.181116544 | 0.230885608 | 0.385953961 | 0.204837417  | 0.003543619 | 0.010449761 |
| UTR5 | SOX17   | 8  | 55370544/5537057<br>9                                                                   | 2 | cg02919422/cg26059<br>468                                                                               | 0.485218765 | 0.550892078 | 0.669415714 | 0.184196949  | 1.00E-08    | 1.31E-07    |
| UTR5 | SOX7    | 8  | 10588013                                                                                | 1 | cg08056146                                                                                              | 0.078167564 | 0.105904248 | 0.230397847 | 0.152230283  | 0.005176467 | 0.014615213 |
| UTR5 | SPAG4L  | 20 | 31592147                                                                                | 1 | cg02510802                                                                                              | 0.74023952  | 0.573631311 | 0.371162491 | -0.369077029 | 4.41E-12    | 5.82E-10    |
| UTR5 | SPAG6   | 10 | 22634432/2263443<br>9                                                                   | 2 | cg05099508/cg24031<br>355                                                                               | 0.14319122  | 0.251403974 | 0.375843679 | 0.23265246   | 1.01E-05    | 5.41E-05    |
| UTR5 | SPATA16 | 3  | 172859022/172858<br>917/172858390/172<br>841689/172856620/<br>172858969                 | 6 | cg01216369/cg06577<br>725/cg06728232/cg1<br>6760223/cg19391006<br>/cg19933965                           | 0.789834203 | 0.669323656 | 0.528735991 | -0.261098212 | 9.73E-10    | 2.00E-08    |

|      |        |    |                                                                                                                                                                                                                                                                                               |    |                                                                                                                                                                                                                                                                                                                                                           |             |             |             |              |             |             |          |
|------|--------|----|-----------------------------------------------------------------------------------------------------------------------------------------------------------------------------------------------------------------------------------------------------------------------------------------------|----|-----------------------------------------------------------------------------------------------------------------------------------------------------------------------------------------------------------------------------------------------------------------------------------------------------------------------------------------------------------|-------------|-------------|-------------|--------------|-------------|-------------|----------|
| UTR5 | SPATS1 | 6  | 44310640/4431044<br>5                                                                                                                                                                                                                                                                         | 2  | cg05010967/cg09662<br>584                                                                                                                                                                                                                                                                                                                                 | 0.316295765 | 0.389153327 | 0.488022368 | 0.171726603  | 7.81E-07    | 5.64E-06    |          |
| UTR5 | SPG20  | 13 | 36920965/3691996<br>0/36919819/369197<br>38/36920813/36924<br>539/36920644/3692<br>0987/36919344/369<br>21107/36944294/36<br>919409/36916913/3<br>6920685/36920771/<br>36921096/3692033<br>2/36919905/369273<br>79/36919674/36920<br>975/36920662/3692<br>1003/36918614/369<br>20660/36921174 | 26 | cg00576301/cg00947<br>032/cg01404317/cg0<br>3966514/cg04117229<br>/cg04610375/cg0493<br>9555/cg05123138/cg<br>09072216/cg0918484<br>2/cg09190748/cg105<br>58887/cg11583802/c<br>g12363807/cg139964<br>05/cg15390960/cg16<br>741041/cg18755783/<br>cg19712291/cg20691<br>205/cg22170732/cg2<br>2609576/cg22831315<br>/cg25179758/cg2546<br>8863/cg25921358 |             | 0.199111736 | 0.263337087 | 0.374902111  | 0.175790375 | 1.17E-05    | 6.21E-05 |
| UTR5 | SPHKAP | 2  | 229046325                                                                                                                                                                                                                                                                                     | 1  | cg04072323                                                                                                                                                                                                                                                                                                                                                | 0.285360715 | 0.389797139 | 0.577976023 | 0.292615308  | 6.01E-09    | 8.67E-08    |          |
| UTR5 | SPO11  | 20 | 55904856/5590487<br>5                                                                                                                                                                                                                                                                         | 2  | cg19911058/cg26645<br>834                                                                                                                                                                                                                                                                                                                                 | 0.728778565 | 0.583588719 | 0.48247803  | -0.246300535 | 1.48E-12    | 3.26E-10    |          |
| UTR5 | SPOCK1 | 5  | 136834877/136834<br>294/136834863/136<br>834492/136834453/<br>136834392/136834<br>464                                                                                                                                                                                                         | 7  | cg05143123/cg09054<br>633/cg12832649/cg1<br>4650610/cg18263365<br>/cg18603028/cg2484<br>7829                                                                                                                                                                                                                                                              | 0.263187511 | 0.34068157  | 0.506172196 | 0.242984685  | 1.88E-07    | 1.65E-06    |          |
| UTR5 | SPOCK3 | 4  | 168155510/168155<br>695/168155687                                                                                                                                                                                                                                                             | 3  | cg00901765/cg09722<br>742/cg13913012                                                                                                                                                                                                                                                                                                                      | 0.134281269 | 0.199346221 | 0.333962825 | 0.199681555  | 3.23E-06    | 1.98E-05    |          |
| UTR5 | SPRR1A | 1  | 152957379/152957<br>018                                                                                                                                                                                                                                                                       | 2  | cg07909128/cg27569<br>034                                                                                                                                                                                                                                                                                                                                 | 0.68510742  | 0.56492285  | 0.513602959 | -0.171504461 | 9.18E-06    | 5.00E-05    |          |
| UTR5 | SRD5A2 | 2  | 31805970                                                                                                                                                                                                                                                                                      | 1  | cg18948125                                                                                                                                                                                                                                                                                                                                                | 0.494859255 | 0.564542572 | 0.671387095 | 0.17652784   | 1.70E-11    | 1.44E-09    |          |
| UTR5 | SST    | 3  | 187388148/187388<br>128                                                                                                                                                                                                                                                                       | 2  | cg02164046/cg16927<br>040                                                                                                                                                                                                                                                                                                                                 | 0.42472524  | 0.517541022 | 0.644218814 | 0.219493574  | 2.32E-11    | 1.69E-09    |          |
| UTR5 | SSTR2  | 17 | 71162349/7116150<br>2/71161322/711619<br>26/71162393/71161<br>178/71161796/7116<br>2159/71161160/711<br>61415/71161258                                                                                                                                                                        | 11 | cg00902823/cg03693<br>811/cg06685177/cg0<br>9563244/cg09584801<br>/cg13344169/cg1423<br>2289/cg18248022/cg<br>21547708/cg2672919<br>7/cg27066284                                                                                                                                                                                                          | 0.12660554  | 0.194900051 | 0.292620743 | 0.166015203  | 0.000143893 | 0.000591301 |          |

|      |            |    |                                                                                                                               |    |                                                                                                                                                           |             |             |             |              |             |             |
|------|------------|----|-------------------------------------------------------------------------------------------------------------------------------|----|-----------------------------------------------------------------------------------------------------------------------------------------------------------|-------------|-------------|-------------|--------------|-------------|-------------|
| UTR5 | ST6GALNAC1 | 17 | 74639849/74639793/74639731                                                                                                    | 3  | cg11469587/cg13015534/cg15503752                                                                                                                          | 0.385521762 | 0.281389767 | 0.225724409 | -0.159797353 | 2.00E-11    | 1.58E-09    |
| UTR5 | ST6GALNAC5 | 1  | 77333229/77333198                                                                                                             | 2  | cg04077662/cg06201642                                                                                                                                     | 0.26808874  | 0.377675175 | 0.53033383  | 0.26224509   | 1.48E-07    | 1.33E-06    |
| UTR5 | ST8SIA1    | 12 | 22487437/22487459/22487219                                                                                                    | 3  | cg09354309/cg10333808/cg24723331                                                                                                                          | 0.135148496 | 0.178398841 | 0.346324339 | 0.211175843  | 0.00031756  | 0.001198556 |
| UTR5 | ST8SIA3    | 18 | 55019843                                                                                                                      | 1  | cg13096208                                                                                                                                                | 0.440201565 | 0.552931606 | 0.745647236 | 0.305445671  | 1.71E-12    | 3.47E-10    |
| UTR5 | ST8SIA4    | 5  | 100238977/100238983/100238819                                                                                                 | 3  | cg03975797/cg04380513/cg18428516                                                                                                                          | 0.123182906 | 0.209479751 | 0.350628455 | 0.227445549  | 7.85E-06    | 4.34E-05    |
| UTR5 | STAB2      | 12 | 103981113                                                                                                                     | 1  | cg10622586                                                                                                                                                | 0.53435505  | 0.432629811 | 0.376232255 | -0.158122795 | 1.01E-09    | 2.05E-08    |
| UTR5 | STAP1      | 4  | 68424495                                                                                                                      | 1  | cg12879425                                                                                                                                                | 0.515848295 | 0.456623606 | 0.33362903  | -0.182219265 | 0.000125038 | 0.000521071 |
| UTR5 | STMN2      | 8  | 80523413                                                                                                                      | 1  | cg09071889                                                                                                                                                | 0.37668888  | 0.499617317 | 0.643886368 | 0.267197488  | 1.24E-09    | 2.42E-08    |
| UTR5 | STOX2      | 4  | 184826953/184827086/184827754/184827491/184826704                                                                             | 5  | cg01758805/cg02071076/cg02500300/cg06367693/cg11354594                                                                                                    | 0.222166173 | 0.24050692  | 0.39943448  | 0.177268306  | 0.00033048  | 0.00124203  |
| UTR5 | STRA6      | 15 | 74495354/74496040/74494909/74494861/74501317/74495109/74495603/74494781/74495657/74496576/74495637/74494854/74494900/74495384 | 14 | cg00075967/cg00316939/cg00597876/cg01332054/cg11680605/cg11787522/cg13888509/cg17516330/cg18640660/cg21068293/cg22672067/cg23887948/cg26451735/cg26774156 | 0.598030574 | 0.521504559 | 0.435804479 | -0.162226096 | 3.65E-12    | 5.48E-10    |
| UTR5 | STX19      | 3  | 93740824/93747410                                                                                                             | 2  | cg16645976/cg27200466                                                                                                                                     | 0.58232939  | 0.443080756 | 0.341259436 | -0.241069954 | 2.25E-11    | 1.67E-09    |
| UTR5 | SUNC1      | 7  | 48068665                                                                                                                      | 1  | cg23509098                                                                                                                                                | 0.70715429  | 0.561490989 | 0.376269341 | -0.330884949 | 9.92E-14    | 6.84E-11    |
| UTR5 | SUSD5      | 3  | 33260366                                                                                                                      | 1  | cg09463233                                                                                                                                                | 0.175253587 | 0.312971031 | 0.436781936 | 0.261528349  | 9.08E-06    | 4.96E-05    |
| UTR5 | SV2A       | 1  | 149889364/149889361/149889339/149889330                                                                                       | 4  | cg01705587/cg04927502/cg11085602/cg24629122                                                                                                               | 0.090721684 | 0.157913011 | 0.265194618 | 0.174472933  | 6.84E-05    | 0.000303113 |
| UTR5 | SYCP1      | 1  | 115397857/115397597/115398073/115397616                                                                                       | 4  | cg10440578/cg18087477/cg18396987/cg27332337                                                                                                               | 0.495611519 | 0.594240294 | 0.681232969 | 0.185621451  | 6.64E-10    | 1.49E-08    |
| UTR5 | SYCP2L     | 6  | 10887185                                                                                                                      | 1  | cg26237681                                                                                                                                                | 0.159986403 | 0.224231299 | 0.459437943 | 0.29945154   | 3.42E-06    | 2.07E-05    |
| UTR5 | SYT8       | 11 | 1855746                                                                                                                       | 1  | cg03861143                                                                                                                                                | 0.55054825  | 0.440729306 | 0.354293586 | -0.196254664 | 1.30E-11    | 1.18E-09    |
| UTR5 | SYT9       | 11 | 7273378                                                                                                                       | 1  | cg22723056                                                                                                                                                | 0.207953585 | 0.270369861 | 0.429017443 | 0.221063858  | 7.66E-05    | 0.000335215 |

|      |       |   |                                                                                                                                                                                                                                                                                                                                                                                                                                                                                                                                                                                         |    |                                                                                                                                                                                                                                                                                                                                                                                                                                                                                                                                                                                                                                           |             |             |             |             |             |             |
|------|-------|---|-----------------------------------------------------------------------------------------------------------------------------------------------------------------------------------------------------------------------------------------------------------------------------------------------------------------------------------------------------------------------------------------------------------------------------------------------------------------------------------------------------------------------------------------------------------------------------------------|----|-------------------------------------------------------------------------------------------------------------------------------------------------------------------------------------------------------------------------------------------------------------------------------------------------------------------------------------------------------------------------------------------------------------------------------------------------------------------------------------------------------------------------------------------------------------------------------------------------------------------------------------------|-------------|-------------|-------------|-------------|-------------|-------------|
| UTR5 | SYTL3 | 6 | 159071106/159084<br>032/159075773/159<br>071076                                                                                                                                                                                                                                                                                                                                                                                                                                                                                                                                         | 4  | cg00370106/cg10296<br>205/cg11879354/cg1<br>7768957                                                                                                                                                                                                                                                                                                                                                                                                                                                                                                                                                                                       | 0.454297626 | 0.352622036 | 0.269022336 | -0.18527529 | 1.75E-08    | 2.10E-07    |
| UTR5 | T     | 6 | 166581272/166581<br>538/166581519/166<br>581929                                                                                                                                                                                                                                                                                                                                                                                                                                                                                                                                         | 4  | cg00070318/cg05478<br>631/cg07991951/cg2<br>3688510                                                                                                                                                                                                                                                                                                                                                                                                                                                                                                                                                                                       | 0.201115466 | 0.265016835 | 0.374334827 | 0.173219361 | 0.000614666 | 0.002160212 |
| UTR5 | TAC1  | 7 | 97361759/9736140<br>8                                                                                                                                                                                                                                                                                                                                                                                                                                                                                                                                                                   | 2  | cg14221171/cg16288<br>089                                                                                                                                                                                                                                                                                                                                                                                                                                                                                                                                                                                                                 | 0.38903177  | 0.447987311 | 0.610351032 | 0.221319262 | 1.29E-05    | 6.77E-05    |
| UTR5 | TACR3 | 4 | 104640833                                                                                                                                                                                                                                                                                                                                                                                                                                                                                                                                                                               | 1  | cg16461251                                                                                                                                                                                                                                                                                                                                                                                                                                                                                                                                                                                                                                | 0.38470884  | 0.475705944 | 0.620553073 | 0.235844233 | 6.65E-09    | 9.39E-08    |
| UTR5 | TBX15 | 1 | 119530144/119529<br>930/119527008/119<br>531718/119529360/<br>119530600/119528<br>018/119526783/119<br>529219/119522637/<br>119528424/119528<br>638/119532093/119<br>529266/119524323/<br>119527884/119532<br>116/119521928/119<br>527156/119522425/<br>119522386/119527<br>638/119531122/119<br>532044/119528688/<br>119520934/119526<br>060/119502537/119<br>522855/119526437/<br>119528164/119531<br>625/119530677/119<br>527111/119522188/<br>119530048/119526<br>882/119530932/119<br>526255/119531857/<br>119532056/119531<br>093/119527377/119<br>519115/119530702/<br>119528848 | 46 | cg00173504/cg02177<br>231/cg02829688/cg0<br>3760839/cg03989260<br>/cg04550737/cg0470<br>7332/cg05172122/cg<br>05363616/cg0615865<br>0/cg06204711/cg078<br>20868/cg07892597/c<br>g09260773/cg097897<br>68/cg10145246/cg10<br>703826/cg11391335/<br>cg13080379/cg13245<br>593/cg13655674/cg1<br>4175690/cg14415885<br>/cg14565725/cg1551<br>3743/cg15553612/cg<br>16990168/cg1786807<br>9/cg18944010/cg197<br>30691/cg21170796/c<br>g21295088/cg213923<br>41/cg21647227/cg22<br>378919/cg23588217/<br>cg24144440/cg24475<br>782/cg24720355/cg2<br>4842086/cg24884142<br>/cg25755283/cg2610<br>4752/cg26164798/cg<br>27262412/cg2751768<br>1 | 0.360006966 | 0.408948693 | 0.531217371 | 0.171210405 | 2.12E-07    | 1.83E-06    |

|      |          |    |                                                                                                                                                                                 |    |                                                                                                                                                                                                                     |             |             |             |              |             |             |
|------|----------|----|---------------------------------------------------------------------------------------------------------------------------------------------------------------------------------|----|---------------------------------------------------------------------------------------------------------------------------------------------------------------------------------------------------------------------|-------------|-------------|-------------|--------------|-------------|-------------|
| UTR5 | TBX20    | 7  | 35293537/3529330<br>9/35293279/352932<br>45                                                                                                                                     | 4  | cg02008154/cg08959<br>216/cg10778441/cg1<br>8249173                                                                                                                                                                 | 0.31528686  | 0.383309981 | 0.471653007 | 0.156366147  | 0.000679395 | 0.002362931 |
| UTR5 | TCF21    | 6  | 134210273/134210<br>279/134210307                                                                                                                                               | 3  | cg12468478/cg17470<br>942/cg24157171                                                                                                                                                                                | 0.345662453 | 0.370698205 | 0.496025864 | 0.150363411  | 3.84E-06    | 2.29E-05    |
| UTR5 | TCP10    | 6  | 167797877                                                                                                                                                                       | 1  | cg19930296                                                                                                                                                                                                          | 0.7115431   | 0.607950922 | 0.492313495 | -0.219229605 | 3.59E-08    | 3.93E-07    |
| UTR5 | TCP10L   | 21 | 33956668/3395729<br>0                                                                                                                                                           | 2  | cg04986276/cg20857<br>253                                                                                                                                                                                           | 0.525256333 | 0.431422028 | 0.353399936 | -0.171856396 | 1.34E-12    | 3.05E-10    |
| UTR5 | TCP10L2  | 6  | 167584900/167584<br>201                                                                                                                                                         | 2  | cg11121709/cg16214<br>245                                                                                                                                                                                           | 0.718269    | 0.609363256 | 0.498562314 | -0.219706686 | 6.80E-08    | 6.85E-07    |
| UTR5 | TCTEX1D1 | 1  | 67218505/6721827<br>5/67218165                                                                                                                                                  | 3  | cg19159365/cg24161<br>501/cg25339566                                                                                                                                                                                | 0.339405563 | 0.419645643 | 0.538412515 | 0.199006952  | 1.56E-05    | 8.04E-05    |
| UTR5 | TDO2     | 4  | 156824883                                                                                                                                                                       | 1  | cg04795662                                                                                                                                                                                                          | 0.510825065 | 0.410470811 | 0.313949386 | -0.196875679 | 2.15E-07    | 1.85E-06    |
| UTR5 | TEKT1    | 17 | 6734991/6734940                                                                                                                                                                 | 2  | cg13337865/cg20663<br>042                                                                                                                                                                                           | 0.189928838 | 0.21198984  | 0.389665511 | 0.199736674  | 4.53E-06    | 2.65E-05    |
| UTR5 | TEKT2    | 1  | 36549719/3654972<br>6                                                                                                                                                           | 2  | cg19644018/cg24813<br>212                                                                                                                                                                                           | 0.123482982 | 0.178071389 | 0.275627008 | 0.152144026  | 0.000826083 | 0.002827919 |
| UTR5 | TEKT5    | 16 | 10788751                                                                                                                                                                        | 1  | cg01573635                                                                                                                                                                                                          | 0.47936451  | 0.369222778 | 0.292530468 | -0.186834042 | 1.50E-12    | 3.26E-10    |
| UTR5 | TET1     | 10 | 70321580/7032021<br>3/70320532/703213<br>83/70320734/70321<br>668/70321959/7032<br>1574/70321243/703<br>21874/70322874/70<br>322442/70320470/7<br>0321770/70321554/<br>70321889 | 16 | cg02774862/cg03651<br>138/cg03756448/cg0<br>6767766/cg09183181<br>/cg09978996/cg1040<br>3849/cg12630147/cg<br>13848707/cg1525423<br>8/cg17817532/cg191<br>27638/cg19439331/c<br>g20326704/cg233503<br>36/cg25926515 | 0.376264301 | 0.463444731 | 0.534331812 | 0.158067511  | 5.85E-09    | 8.50E-08    |
| UTR5 | TF       | 3  | 133465180                                                                                                                                                                       | 1  | cg24879335                                                                                                                                                                                                          | 0.359086565 | 0.403408922 | 0.534619114 | 0.175532549  | 7.70E-05    | 0.000336616 |
| UTR5 | TFEC     | 7  | 115670795                                                                                                                                                                       | 1  | cg15339605                                                                                                                                                                                                          | 0.260855737 | 0.142948516 | 0.083422935 | -0.177432802 | 2.39E-08    | 2.74E-07    |
| UTR5 | TFF1     | 21 | 43786627                                                                                                                                                                        | 1  | cg06099014                                                                                                                                                                                                          | 0.495460795 | 0.409595083 | 0.328818418 | -0.166642377 | 2.91E-11    | 1.87E-09    |
| UTR5 | TFPI2    | 7  | 93520036/9352002<br>4/93520012                                                                                                                                                  | 3  | cg14775114/cg17338<br>208/cg24531255                                                                                                                                                                                | 0.139304337 | 0.329598872 | 0.545375324 | 0.406070988  | 2.55E-11    | 1.74E-09    |
| UTR5 | TGM3     | 20 | 2276663                                                                                                                                                                         | 1  | cg24731241                                                                                                                                                                                                          | 0.624083145 | 0.540739672 | 0.429558477 | -0.194524668 | 2.28E-10    | 6.88E-09    |
| UTR5 | TGM4     | 3  | 44916102                                                                                                                                                                        | 1  | cg26264008                                                                                                                                                                                                          | 0.49521531  | 0.4171876   | 0.333413573 | -0.161801737 | 1.62E-08    | 1.96E-07    |
| UTR5 | THBS4    | 5  | 79331047/7933113<br>5                                                                                                                                                           | 2  | cg03336086/cg23244<br>289                                                                                                                                                                                           | 0.21131581  | 0.27488459  | 0.410746151 | 0.199430341  | 2.79E-05    | 0.000134558 |
| UTR5 | THEM5    | 1  | 151826167/151826<br>123                                                                                                                                                         | 2  | cg11344950/cg18081<br>104                                                                                                                                                                                           | 0.50145591  | 0.420248339 | 0.32742578  | -0.17403013  | 1.44E-10    | 4.82E-09    |

|      |          |    |                                                                                                               |    |                                                                                                                          |             |             |             |              |             |             |
|------|----------|----|---------------------------------------------------------------------------------------------------------------|----|--------------------------------------------------------------------------------------------------------------------------|-------------|-------------|-------------|--------------|-------------|-------------|
| UTR5 | THY1     | 11 | 119293385/119291765/119293601/119292885/119292737/119293861/119293780/119293869/119293863/119292770           | 10 | cg02455397/cg02632800/cg02955631/cg04976484/cg05916744/cg10601287/cg12508624/cg16566400/cg17236709/cg20884984            | 0.216442944 | 0.280876213 | 0.40587568  | 0.189432736  | 6.44E-07    | 4.75E-06    |
| UTR5 | TLL1     | 4  | 166794471/166794895/166794971/166794786                                                                       | 4  | cg08570521/cg09669853/cg19898128/cg24521633                                                                              | 0.14149001  | 0.220108282 | 0.378027405 | 0.236537396  | 9.05E-06    | 4.95E-05    |
| UTR5 | TLX1     | 10 | 102891076/102891280/102891080                                                                                 | 3  | cg02096397/cg05329692/cg27272677                                                                                         | 0.223234961 | 0.216491831 | 0.393620272 | 0.170385311  | 0.000543386 | 0.001933252 |
| UTR5 | TLX3     | 5  | 170736335                                                                                                     | 1  | cg02743222                                                                                                               | 0.338009175 | 0.343386228 | 0.514287045 | 0.17627787   | 0.001138108 | 0.003760152 |
| UTR5 | TM4SF19  | 3  | 196065189/196065106                                                                                           | 2  | cg02322879/cg05556202                                                                                                    | 0.732734068 | 0.6506297   | 0.554201373 | -0.178532695 | 6.22E-08    | 6.32E-07    |
| UTR5 | TM4SF4   | 3  | 149192609                                                                                                     | 1  | cg05483388                                                                                                               | 0.533137955 | 0.438724928 | 0.357236132 | -0.175901823 | 3.76E-12    | 5.48E-10    |
| UTR5 | TM6SF1   | 15 | 83776422/83776420                                                                                             | 2  | cg03063639/cg26460092                                                                                                    | 0.288529638 | 0.477104186 | 0.674643993 | 0.386114356  | 3.82E-14    | 3.95E-11    |
| UTR5 | TMCO5A   | 15 | 38228220                                                                                                      | 1  | cg03832697                                                                                                               | 0.73689691  | 0.667293122 | 0.542543155 | -0.194353755 | 2.33E-06    | 1.48E-05    |
| UTR5 | TMEFF2   | 2  | 193059405                                                                                                     | 1  | cg06856528                                                                                                               | 0.23311806  | 0.307321056 | 0.414922759 | 0.181804699  | 4.02E-05    | 0.000187886 |
| UTR5 | TMEM126A | 11 | 85359218/85359560                                                                                             | 2  | cg06698742/cg26796873                                                                                                    | 0.426457665 | 0.344058511 | 0.248411477 | -0.178046188 | 3.74E-10    | 9.79E-09    |
| UTR5 | TMEM130  | 7  | 98467571                                                                                                      | 1  | cg01307939                                                                                                               | 0.072572016 | 0.210948573 | 0.306677468 | 0.234105452  | 2.16E-11    | 1.65E-09    |
| UTR5 | TMEM132D | 12 | 130388198                                                                                                     | 1  | cg23266743                                                                                                               | 0.351685445 | 0.429984967 | 0.534556495 | 0.18287105   | 2.16E-06    | 1.38E-05    |
| UTR5 | TMEM139  | 7  | 142982463/142982262                                                                                           | 2  | cg08261841/cg26511386                                                                                                    | 0.576420968 | 0.44608855  | 0.335559352 | -0.240861615 | 4.41E-12    | 5.82E-10    |
| UTR5 | TMEM155  | 4  | 122685352/122686269/122685570/122686038/122685651/122685145/122685675/122685641/122684903/122685423/122686319 | 11 | cg03077077/cg05396987/cg10620484/cg10863741/cg13640145/cg14654731/cg16790291/cg18149485/cg19122004/cg19737970/cg21077559 | 0.465590966 | 0.536994112 | 0.62922631  | 0.163635344  | 4.87E-08    | 5.09E-07    |
| UTR5 | TMEM196  | 7  | 19812327                                                                                                      | 1  | cg08991339                                                                                                               | 0.276333955 | 0.324308372 | 0.432952155 | 0.1566182    | 1.58E-05    | 8.11E-05    |
| UTR5 | TMEM215  | 9  | 32783516                                                                                                      | 1  | cg11308840                                                                                                               | 0.262321    | 0.324663561 | 0.42953105  | 0.16721005   | 4.92E-05    | 0.000224677 |
| UTR5 | TMEM220  | 17 | 10633470                                                                                                      | 1  | cg01275588                                                                                                               | 0.219031841 | 0.251888634 | 0.387590759 | 0.168558918  | 0.010184019 | 0.026609717 |
| UTR5 | TMEM71   | 8  | 133772657/133772889/133772742                                                                                 | 3  | cg03141298/cg20955688/cg27159719                                                                                         | 0.321192697 | 0.169322804 | 0.169164931 | -0.152027765 | 9.77E-06    | 5.28E-05    |
| UTR5 | TMEM79   | 1  | 156254149/156254757                                                                                           | 2  | cg00249974/cg05954120                                                                                                    | 0.63132282  | 0.508628472 | 0.461014418 | -0.170308402 | 4.96E-09    | 7.40E-08    |



|      |           |    |                                                                                                                                                                    |    |                                                                                                                                                                                                           |             |             |             |              |             |             |
|------|-----------|----|--------------------------------------------------------------------------------------------------------------------------------------------------------------------|----|-----------------------------------------------------------------------------------------------------------------------------------------------------------------------------------------------------------|-------------|-------------|-------------|--------------|-------------|-------------|
| UTR5 | TMEM90B   | 20 | 24455463/2445035<br>3/24452036/244510<br>84/24449865/24449<br>916/24451518/2445<br>2131/24451769/244<br>50698/24450361/24<br>452007/24451890/2<br>4451428/24452091 | 15 | cg06271023/cg09623<br>400/cg12831866/cg1<br>5343461/cg16098981<br>/cg16120788/cg1679<br>3866/cg16847695/cg<br>17523124/cg1773984<br>1/cg19654195/cg213<br>38660/cg23849311/c<br>g24504569/cg245980<br>87  | 0.248426224 | 0.327700825 | 0.422902594 | 0.17447637   | 1.80E-05    | 9.13E-05    |
| UTR5 | TMPRSS11B | 4  | 69111391                                                                                                                                                           | 1  | cg06399881                                                                                                                                                                                                | 0.723383995 | 0.599150383 | 0.495239614 | -0.228144381 | 1.62E-09    | 2.96E-08    |
| UTR5 | TMPRSS11E | 4  | 69313197                                                                                                                                                           | 1  | cg24792113                                                                                                                                                                                                | 0.396462015 | 0.294216533 | 0.240996355 | -0.15546566  | 1.26E-09    | 2.44E-08    |
| UTR5 | TMPRSS4   | 11 | 117947997/117947<br>877                                                                                                                                            | 2  | cg05416223/cg22957<br>898                                                                                                                                                                                 | 0.420708625 | 0.338771175 | 0.268289677 | -0.152418948 | 8.31E-11    | 3.33E-09    |
| UTR5 | TMTC1     | 12 | 29925201/2993607<br>5/29937343/299358<br>73/29936839/29936<br>174/29936407/2993<br>7188/29932047/299<br>36486/29935411/29<br>936972/29936125/2<br>9936845/29937585 | 15 | cg01401465/cg04822<br>518/cg06630204/cg0<br>8275602/cg08729318<br>/cg10512875/cg1271<br>8339/cg13239483/cg<br>13318543/cg1343430<br>8/cg14258853/cg157<br>20995/cg19792268/c<br>g201401110/cg207847<br>75 | 0.327751996 | 0.374996381 | 0.4922112   | 0.164459204  | 9.40E-07    | 6.64E-06    |
| UTR5 | TNFAIP2   | 14 | 103592734                                                                                                                                                          | 1  | cg04264002                                                                                                                                                                                                | 0.54440615  | 0.451647061 | 0.385773686 | -0.158632464 | 1.62E-06    | 1.07E-05    |
| UTR5 | TNS4      | 17 | 38657310/3865549<br>2/38655903                                                                                                                                     | 3  | cg08696192/cg15379<br>400/cg27016929                                                                                                                                                                      | 0.46670449  | 0.350242465 | 0.277668714 | -0.189035776 | 2.25E-13    | 9.98E-11    |
| UTR5 | TP63      | 3  | 189349278                                                                                                                                                          | 1  | cg04483101                                                                                                                                                                                                | 0.789884795 | 0.654894444 | 0.517826005 | -0.27205879  | 2.99E-07    | 2.47E-06    |
| UTR5 | TPD52     | 8  | 80992750/8108382<br>9                                                                                                                                              | 2  | cg16773115/cg22273<br>042                                                                                                                                                                                 | 0.61247576  | 0.492659661 | 0.383975359 | -0.228500401 | 2.19E-11    | 1.65E-09    |
| UTR5 | TPD52L3   | 9  | 6328386/6328493                                                                                                                                                    | 2  | cg03485840/cg14286<br>682                                                                                                                                                                                 | 0.624802443 | 0.523139206 | 0.448331048 | -0.176471395 | 7.60E-11    | 3.22E-09    |
| UTR5 | TPM4      | 19 | 16178426/1618736<br>4                                                                                                                                              | 2  | cg22270364/cg25593<br>560                                                                                                                                                                                 | 0.784131385 | 0.736797406 | 0.588106991 | -0.196024394 | 0.000303998 | 0.001156514 |
| UTR5 | TPTE2     | 13 | 20110871                                                                                                                                                           | 1  | cg19950767                                                                                                                                                                                                | 0.73145477  | 0.68496045  | 0.573175373 | -0.158279397 | 2.86E-06    | 1.78E-05    |
| UTR5 | TREM2     | 6  | 41130917                                                                                                                                                           | 1  | cg01980222                                                                                                                                                                                                | 0.5824335   | 0.493762728 | 0.41245735  | -0.16997615  | 2.57E-06    | 1.62E-05    |

|      |         |    |                                                                                                                         |    |                                                                                                                                       |             |             |             |              |             |             |
|------|---------|----|-------------------------------------------------------------------------------------------------------------------------|----|---------------------------------------------------------------------------------------------------------------------------------------|-------------|-------------|-------------|--------------|-------------|-------------|
| UTR5 | TRH     | 3  | 129693613/129693<br>586/129694057/129<br>693791/129694487/<br>129693385/129694<br>156/129693370/129<br>693489/129694392 | 10 | cg01009664/cg02700<br>891/cg05013728/cg0<br>5835982/cg08195943<br>/cg11940285/cg1459<br>5003/cg18862481/cg<br>22512438/cg2293160<br>4 | 0.303001046 | 0.394063468 | 0.582192628 | 0.279191582  | 2.75E-09    | 4.52E-08    |
| UTR5 | TRIM31  | 6  | 30080782/3008064<br>2                                                                                                   | 2  | cg00679556/cg03339<br>321                                                                                                             | 0.54873495  | 0.415189644 | 0.298069295 | -0.250665655 | 1.89E-12    | 3.63E-10    |
| UTR5 | TRIM42  | 3  | 140396963                                                                                                               | 1  | cg06090362                                                                                                                            | 0.55280799  | 0.451339978 | 0.374193964 | -0.178614026 | 5.27E-08    | 5.46E-07    |
| UTR5 | TRIM43B | 2  | 96149768                                                                                                                | 1  | cg00135121                                                                                                                            | 0.803248445 | 0.751737411 | 0.639437432 | -0.163811013 | 1.30E-06    | 8.83E-06    |
| UTR5 | TRIM61  | 4  | 165898666/165898<br>707                                                                                                 | 2  | cg16691177/cg25147<br>158                                                                                                             | 0.521835355 | 0.616170856 | 0.697822795 | 0.17598744   | 8.25E-09    | 1.12E-07    |
| UTR5 | TRIM71  | 3  | 32859558                                                                                                                | 1  | cg23243038                                                                                                                            | 0.213643365 | 0.280635194 | 0.42770525  | 0.214061885  | 3.59E-05    | 0.000169486 |
| UTR5 | TRPC6   | 11 | 101454317/101454<br>626                                                                                                 | 2  | cg03411507/cg11016<br>563                                                                                                             | 0.33482509  | 0.403225172 | 0.58180788  | 0.24698279   | 2.97E-11    | 1.89E-09    |
| UTR5 | TRPC7   | 5  | 135701094/135701<br>050                                                                                                 | 2  | cg06448705/cg23288<br>973                                                                                                             | 0.416880065 | 0.493009661 | 0.615086455 | 0.19820639   | 1.17E-08    | 1.50E-07    |
| UTR5 | TRPM6   | 9  | 77502963                                                                                                                | 1  | cg16509045                                                                                                                            | 0.516212135 | 0.397709394 | 0.298444241 | -0.217767894 | 2.33E-11    | 1.69E-09    |
| UTR5 | TSPAN16 | 19 | 11406877                                                                                                                | 1  | cg25382751                                                                                                                            | 0.71516107  | 0.638278567 | 0.526796245 | -0.188364825 | 5.46E-06    | 3.13E-05    |
| UTR5 | TSPYL5  | 8  | 98290148                                                                                                                | 1  | cg18233405                                                                                                                            | 0.201159378 | 0.305637734 | 0.42233355  | 0.221174172  | 2.20E-09    | 3.78E-08    |
| UTR5 | TSSK6   | 19 | 19626428/1962625<br>1                                                                                                   | 2  | cg03854071/cg23069<br>923                                                                                                             | 0.632560395 | 0.530680122 | 0.459436059 | -0.173124336 | 3.76E-09    | 5.88E-08    |
| UTR5 | TTN     | 2  | 179672121/179672<br>126                                                                                                 | 2  | cg05185019/cg10859<br>358                                                                                                             | 0.776356565 | 0.58309665  | 0.495723477 | -0.280633088 | 8.73E-09    | 1.17E-07    |
| UTR5 | TUSC3   | 8  | 15397899/1539773<br>1/15397729                                                                                          | 3  | cg03032098/cg03127<br>174/cg18145877                                                                                                  | 0.356067475 | 0.480679052 | 0.611933545 | 0.25586607   | 3.46E-09    | 5.46E-08    |
| UTR5 | TWIST1  | 7  | 19157193/1915726<br>3                                                                                                   | 2  | cg17839237/cg24446<br>548                                                                                                             | 0.083262939 | 0.206188919 | 0.519511387 | 0.436248448  | 2.31E-07    | 1.97E-06    |
| UTR5 | TXLNB   | 6  | 139613145                                                                                                               | 1  | cg18953104                                                                                                                            | 0.409258315 | 0.539306706 | 0.625136177 | 0.215877862  | 1.34E-09    | 2.54E-08    |
| UTR5 | UBE2QL1 | 5  | 6449001                                                                                                                 | 1  | cg26692294                                                                                                                            | 0.08178838  | 0.158280672 | 0.276657516 | 0.194869137  | 3.83E-05    | 0.000179623 |
| UTR5 | UCHL1   | 4  | 41258910/4125893<br>5                                                                                                   | 2  | cg07068756/cg16142<br>306                                                                                                             | 0.180193261 | 0.216928306 | 0.377133643 | 0.196940382  | 0.001489093 | 0.004780974 |
| UTR5 | UGT1A6  | 2  | 234601254/234600<br>423/234601443/234<br>601954                                                                         | 4  | cg04449108/cg23338<br>993/cg23510527/cg2<br>3874600                                                                                   | 0.583247518 | 0.479041402 | 0.415079109 | -0.168168409 | 9.67E-11    | 3.69E-09    |
| UTR5 | UGT3A1  | 5  | 35991382                                                                                                                | 1  | cg19897071                                                                                                                            | 0.50859441  | 0.588819472 | 0.686613518 | 0.178019108  | 2.84E-08    | 3.20E-07    |
| UTR5 | UGT3A2  | 5  | 36066972/3606694<br>4                                                                                                   | 2  | cg10140794/cg27638<br>727                                                                                                             | 0.24182068  | 0.320017039 | 0.399293809 | 0.157473129  | 2.25E-06    | 1.43E-05    |
| UTR5 | UMOD    | 16 | 20363009/2036371<br>1                                                                                                   | 2  | cg04231019/cg07456<br>201                                                                                                             | 0.656458963 | 0.488502464 | 0.322445711 | -0.334013251 | 6.88E-13    | 2.19E-10    |
| UTR5 | UNC45B  | 17 | 33475031/3347491<br>4                                                                                                   | 2  | cg25013053/cg26751<br>372                                                                                                             | 0.82058443  | 0.772294197 | 0.670343723 | -0.150240707 | 3.65E-06    | 2.19E-05    |
| UTR5 | UNC5C   | 4  | 96470053/9647009<br>4                                                                                                   | 2  | cg00329039/cg10520<br>887                                                                                                             | 0.247111658 | 0.332582539 | 0.448170536 | 0.201058879  | 3.76E-06    | 2.25E-05    |

|      |        |    |                                                                                                                      |    |                                                                                                                                                |             |             |             |              |             |             |
|------|--------|----|----------------------------------------------------------------------------------------------------------------------|----|------------------------------------------------------------------------------------------------------------------------------------------------|-------------|-------------|-------------|--------------|-------------|-------------|
| UTR5 | UNC5CL | 6  | 41006345                                                                                                             | 1  | cg09489757                                                                                                                                     | 0.76133877  | 0.690613439 | 0.568967068 | -0.192371702 | 4.74E-07    | 3.65E-06    |
| UTR5 | UNC80  | 2  | 210636748/210636783                                                                                                  | 2  | cg13347071/cg24915947                                                                                                                          | 0.29672162  | 0.357229878 | 0.484749443 | 0.188027823  | 1.03E-06    | 7.25E-06    |
| UTR5 | UPK1B  | 3  | 118903257/118895485                                                                                                  | 2  | cg04857792/cg15717250                                                                                                                          | 0.638241475 | 0.519996278 | 0.429178418 | -0.209063057 | 3.31E-08    | 3.65E-07    |
| UTR5 | USH2A  | 1  | 216596639                                                                                                            | 1  | cg15590780                                                                                                                                     | 0.428820805 | 0.352626139 | 0.254043968 | -0.174776837 | 5.18E-12    | 6.55E-10    |
| UTR5 | USP44  | 12 | 95941920/95941571/95942287/95945120/95942964/95943114/95945082/95942907/95942847/95941988/95942761/95941869/95939442 | 13 | cg00927554/cg03162823/cg03308628/cg03453449/cg07783282/cg09883286/cg11069430/cg13879483/cg17368254/cg22538054/cg22802813/cg23982858/cg26561986 | 0.329253982 | 0.384570931 | 0.534045518 | 0.204791536  | 4.01E-06    | 2.38E-05    |
| UTR5 | VAT1L  | 16 | 77822500                                                                                                             | 1  | cg01256089                                                                                                                                     | 0.105097593 | 0.179936416 | 0.274560032 | 0.169462439  | 0.001965622 | 0.006134719 |
| UTR5 | VCAM1  | 1  | 101185311                                                                                                            | 1  | cg25762679                                                                                                                                     | 0.47501733  | 0.571155178 | 0.627295764 | 0.152278434  | 2.94E-06    | 1.82E-05    |
| UTR5 | VEGFC  | 4  | 177713813                                                                                                            | 1  | cg13378388                                                                                                                                     | 0.29362454  | 0.326766511 | 0.49613375  | 0.20250921   | 0.000434442 | 0.001581944 |
| UTR5 | VIPR2  | 7  | 158937610/158937494                                                                                                  | 2  | cg03976877/cg13794530                                                                                                                          | 0.344609673 | 0.441673113 | 0.646611789 | 0.302002116  | 8.30E-13    | 2.38E-10    |
| UTR5 | VSTM2A | 7  | 54610022/54610192/54610139/54610320                                                                                  | 4  | cg02910208/cg03775422/cg04024095/cg14304469                                                                                                    | 0.27133063  | 0.342809737 | 0.472008952 | 0.200678322  | 2.41E-05    | 0.000118037 |
| UTR5 | VSTM2L | 20 | 36531652                                                                                                             | 1  | cg26366107                                                                                                                                     | 0.115763061 | 0.169990506 | 0.278770598 | 0.163007538  | 0.000469668 | 0.001696767 |
| UTR5 | VSX1   | 20 | 25062754                                                                                                             | 1  | cg00043788                                                                                                                                     | 0.33244861  | 0.353225556 | 0.551050359 | 0.218601749  | 3.99E-07    | 3.17E-06    |
| UTR5 | VSX2   | 14 | 74706196                                                                                                             | 1  | cg07573727                                                                                                                                     | 0.28435026  | 0.385045844 | 0.5782105   | 0.29386024   | 9.35E-08    | 9.03E-07    |
| UTR5 | VWC2   | 7  | 49813763/49814781/49814435/49814597/49813486                                                                         | 5  | cg00333226/cg05470523/cg07039180/cg07379434/cg18206027                                                                                         | 0.204754923 | 0.225809094 | 0.388402172 | 0.183647249  | 4.99E-05    | 0.000227525 |
| UTR5 | WDR17  | 4  | 176987577/176987020/176987313/176987359/176987009/176987453/176987174                                                | 7  | cg03909602/cg08095852/cg08684639/cg11674404/cg11923920/cg25276412/cg27486637                                                                   | 0.135154711 | 0.249051956 | 0.361266876 | 0.226112166  | 3.29E-07    | 2.69E-06    |
| UTR5 | WDR86  | 7  | 151106990                                                                                                            | 1  | cg12433277                                                                                                                                     | 0.31276473  | 0.418221856 | 0.539497191 | 0.226732461  | 7.03E-07    | 5.13E-06    |
| UTR5 | WISP3  | 6  | 112375302/112375333/112375324                                                                                        | 3  | cg07709205/cg10525372/cg21773633                                                                                                               | 0.52809172  | 0.437901892 | 0.354784148 | -0.173307572 | 2.37E-11    | 1.69E-09    |
| UTR5 | WNT2   | 7  | 116963259/116963193                                                                                                  | 2  | cg07697895/cg27331524                                                                                                                          | 0.269514918 | 0.365072882 | 0.541466436 | 0.271951519  | 9.01E-10    | 1.89E-08    |
| UTR5 | XKR3   | 22 | 17290861                                                                                                             | 1  | cg07193389                                                                                                                                     | 0.405922355 | 0.307553306 | 0.238541805 | -0.16738055  | 7.81E-12    | 8.70E-10    |
| UTR5 | XKR7   | 20 | 30555908                                                                                                             | 1  | cg18405539                                                                                                                                     | 0.09956515  | 0.173101257 | 0.264530641 | 0.164965491  | 0.002093947 | 0.006487889 |

|      |        |    |                                                                                                                                                                 |    |                                                                                                                                                                                 |             |             |             |              |             |             |
|------|--------|----|-----------------------------------------------------------------------------------------------------------------------------------------------------------------|----|---------------------------------------------------------------------------------------------------------------------------------------------------------------------------------|-------------|-------------|-------------|--------------|-------------|-------------|
| UTR5 | ZEB2   | 2  | 145277807/145277646/145277852/145277659/145277790/145274975/145275363/145277734/145275322/145275197/145277741/145275441/145275868/145275199/145277596/145277843 | 16 | cg00323965/cg03424727/cg04836221/cg07246225/cg09670616/cg11540007/cg13887004/cg14421309/cg15120754/cg17751438/cg19123296/cg19190728/cg20177310/cg21701531/cg23639412/cg26522240 | 0.111480049 | 0.145501947 | 0.293038442 | 0.181558394  | 3.11E-05    | 0.000148962 |
| UTR5 | ZFP28  | 19 | 57050370/57050367/57050359                                                                                                                                      | 3  | cg21970554/cg22054362/cg24152605                                                                                                                                                | 0.279058381 | 0.324144566 | 0.470186472 | 0.191128091  | 0.000719048 | 0.002484821 |
| UTR5 | ZFP82  | 19 | 36909326/36906819/36909413/36909418                                                                                                                             | 4  | cg07900968/cg19750174/cg24724633/cg25886284                                                                                                                                     | 0.340750433 | 0.49869339  | 0.634785768 | 0.294035336  | 4.39E-08    | 4.67E-07    |
| UTR5 | ZIC1   | 3  | 147127579/147127662/147127193/147127898                                                                                                                         | 4  | cg01610632/cg04738965/cg05073035/cg26375057                                                                                                                                     | 0.444019475 | 0.510451474 | 0.642729435 | 0.19870996   | 8.96E-10    | 1.88E-08    |
| UTR5 | ZIK1   | 19 | 58095659                                                                                                                                                        | 1  | cg26246807                                                                                                                                                                      | 0.375614655 | 0.597706644 | 0.758164927 | 0.382550272  | 1.78E-10    | 5.64E-09    |
| UTR5 | ZNF132 | 19 | 58951434                                                                                                                                                        | 1  | cg19776201                                                                                                                                                                      | 0.121933814 | 0.220579396 | 0.34146989  | 0.219536076  | 8.65E-05    | 0.000374994 |
| UTR5 | ZNF134 | 19 | 58125953/58129233/58125867/58126053                                                                                                                             | 4  | cg08849574/cg13715319/cg18113994/cg23950001                                                                                                                                     | 0.196277209 | 0.338983166 | 0.474386418 | 0.278109209  | 3.00E-07    | 2.48E-06    |
| UTR5 | ZNF135 | 19 | 58570995/58570790                                                                                                                                               | 2  | cg22457238/cg22748799                                                                                                                                                           | 0.36675218  | 0.4747417   | 0.624085245 | 0.257333065  | 1.52E-09    | 2.83E-08    |
| UTR5 | ZNF154 | 19 | 58220370/58220494/58220516                                                                                                                                      | 3  | cg05661282/cg21790626/cg27049766                                                                                                                                                | 0.477791493 | 0.60086215  | 0.697451393 | 0.219659901  | 1.32E-09    | 2.51E-08    |
| UTR5 | ZNF169 | 9  | 97021919/97022269/97025960/97040460/97021966                                                                                                                    | 5  | cg09923314/cg13980266/cg14032959/cg15264273/cg16093876                                                                                                                          | 0.444990219 | 0.331727033 | 0.25659538  | -0.188394839 | 5.36E-13    | 1.80E-10    |
| UTR5 | ZNF177 | 19 | 9476402/9473696/9473715/9474128/9473880/9473781                                                                                                                 | 6  | cg02672003/cg09643544/cg12089570/cg14737994/cg17283453/cg24189904                                                                                                               | 0.483899472 | 0.57424297  | 0.674350926 | 0.190451454  | 1.06E-10    | 3.90E-09    |
| UTR5 | ZNF208 | 19 | 22193724                                                                                                                                                        | 1  | cg26938561                                                                                                                                                                      | 0.51009076  | 0.573753211 | 0.687665023 | 0.177574263  | 2.48E-11    | 1.71E-09    |
| UTR5 | ZNF238 | 1  | 244214593/244214679                                                                                                                                             | 2  | cg01105418/cg23829949                                                                                                                                                           | 0.551873955 | 0.439334472 | 0.352255439 | -0.199618516 | 3.77E-12    | 5.48E-10    |
| UTR5 | ZNF256 | 19 | 58458917/58458979                                                                                                                                               | 2  | cg14556070/cg20176532                                                                                                                                                           | 0.177109025 | 0.217259773 | 0.435286696 | 0.258177672  | 3.65E-05    | 0.000171958 |

|      |         |    |                                                                            |   |                                                                                              |             |             |             |              |             |             |
|------|---------|----|----------------------------------------------------------------------------|---|----------------------------------------------------------------------------------------------|-------------|-------------|-------------|--------------|-------------|-------------|
| UTR5 | ZNF257  | 19 | 22235281/2223527<br>2/22235409                                             | 3 | cg02912127/cg24072<br>202/cg25514554                                                         | 0.40164807  | 0.510587817 | 0.599723843 | 0.198075773  | 4.12E-10    | 1.05E-08    |
| UTR5 | ZNF264  | 19 | 57702917/5770292<br>7/57703144/577029<br>94                                | 4 | cg08504049/cg22307<br>908/cg23257840/cg2<br>4150232                                          | 0.064751927 | 0.119210851 | 0.293953594 | 0.229201667  | 0.000249647 | 0.000969062 |
| UTR5 | ZNF280A | 22 | 22874447/2287459<br>0                                                      | 2 | cg08088989/cg20403<br>031                                                                    | 0.670706765 | 0.544298861 | 0.4968019   | -0.173904865 | 2.72E-05    | 0.000131645 |
| UTR5 | ZNF285A | 19 | 44905343                                                                   | 1 | cg09030119                                                                                   | 0.315716085 | 0.3535753   | 0.481396682 | 0.165680597  | 9.52E-05    | 0.000407002 |
| UTR5 | ZNF304  | 19 | 57862713                                                                   | 1 | cg07494047                                                                                   | 0.084922142 | 0.236218978 | 0.429114705 | 0.344192563  | 2.47E-07    | 2.08E-06    |
| UTR5 | ZNF382  | 19 | 37096321/3709648<br>7/37096329/370997<br>02/37096323/37096<br>816/37096588 | 7 | cg02587316/cg04332<br>534/cg05020604/cg1<br>5463135/cg18630667<br>/cg20440041/cg2251<br>7995 | 0.480212297 | 0.564451695 | 0.653332141 | 0.173119844  | 4.51E-10    | 1.11E-08    |
| UTR5 | ZNF385D | 3  | 21792684/2179243<br>4/21792543                                             | 3 | cg00485194/cg18267<br>381/cg18503679                                                         | 0.322803982 | 0.428720288 | 0.56774422  | 0.244940238  | 1.32E-09    | 2.51E-08    |
| UTR5 | ZNF389  | 6  | 28129556/2812961<br>6                                                      | 2 | cg08968635/cg26335<br>602                                                                    | 0.29862421  | 0.420266606 | 0.550124559 | 0.251500349  | 8.40E-07    | 6.02E-06    |
| UTR5 | ZNF418  | 19 | 58446600/5844643<br>6/58446669/584463<br>12                                | 4 | cg07474494/cg08648<br>727/cg11998703/cg2<br>6671652                                          | 0.385154163 | 0.514900719 | 0.658765421 | 0.273611258  | 3.60E-10    | 9.55E-09    |
| UTR5 | ZNF492  | 19 | 22817371/2281717<br>6/22817496/228173<br>48/22817774                       | 5 | cg01485075/cg03230<br>154/cg18365865/cg1<br>8599790/cg21466963                               | 0.321620655 | 0.403231496 | 0.556110682 | 0.234490027  | 6.48E-09    | 9.21E-08    |
| UTR5 | ZNF543  | 19 | 57831909                                                                   | 1 | cg04696193                                                                                   | 0.090497869 | 0.197819797 | 0.282008214 | 0.191510345  | 0.000735246 | 0.002535852 |
| UTR5 | ZNF544  | 19 | 58740365/5874045<br>5/58740549/587408<br>61/58740253/58740<br>255/58740747 | 7 | cg04352026/cg08397<br>273/cg10051935/cg1<br>4386312/cg21155461<br>/cg21747958/cg2416<br>7652 | 0.134519428 | 0.196379974 | 0.323874238 | 0.18935481   | 0.001708222 | 0.005418614 |
| UTR5 | ZNF547  | 19 | 57875238/5787498<br>8/57875014/578780<br>74/57875295                       | 5 | cg03007201/cg10066<br>151/cg12230795/cg1<br>7313042/cg21068576                               | 0.108855118 | 0.166959063 | 0.285722302 | 0.176867184  | 4.08E-05    | 0.000190216 |
| UTR5 | ZNF549  | 19 | 58038856/5803874<br>2                                                      | 2 | cg07054095/cg13644<br>629                                                                    | 0.160202411 | 0.300530641 | 0.464759873 | 0.304557462  | 5.76E-09    | 8.37E-08    |
| UTR5 | ZNF560  | 19 | 9609204/9605778/9<br>609152/9608947/96<br>08637                            | 5 | cg04062391/cg11396<br>499/cg15222651/cg1<br>6646743/cg18452695                               | 0.473421404 | 0.548576922 | 0.629188636 | 0.155767232  | 5.13E-10    | 1.21E-08    |

|      |         |    |                                                                                         |   |                                                                                                         |             |             |             |             |             |             |
|------|---------|----|-----------------------------------------------------------------------------------------|---|---------------------------------------------------------------------------------------------------------|-------------|-------------|-------------|-------------|-------------|-------------|
| UTR5 | ZNF568  | 19 | 37407284/3740737<br>4/37407462/374098<br>26/37407486/37407<br>889/37407257/3740<br>7413 | 8 | cg02459604/cg03060<br>201/cg03443751/cg0<br>3530260/cg20154403<br>/cg21117780/cg2176<br>1844/cg26612849 | 0.231325747 | 0.337568668 | 0.433281885 | 0.201956138 | 5.44E-05    | 0.000246066 |
| UTR5 | ZNF586  | 19 | 58281117                                                                                | 1 | cg22956410                                                                                              | 0.104819689 | 0.117110548 | 0.328906385 | 0.224086697 | 0.001471101 | 0.004729329 |
| UTR5 | ZNF606  | 19 | 58513648/5851411<br>9/58513526/585140<br>22/58513203/58514<br>694/58514497              | 7 | cg00664634/cg01214<br>989/cg06368093/cg0<br>8397818/cg11740087<br>/cg12259537/cg2548<br>0379            | 0.307946371 | 0.380300445 | 0.485988408 | 0.178042036 | 5.74E-06    | 3.27E-05    |
| UTR5 | ZNF625  | 19 | 12267308/1226746<br>4/12266489                                                          | 3 | cg00875960/cg17892<br>556/cg22606224                                                                    | 0.285091691 | 0.489904084 | 0.591177046 | 0.306085355 | 1.47E-07    | 1.33E-06    |
| UTR5 | ZNF660  | 3  | 44626538/4462686<br>0/44626697/446264<br>92/44629283                                    | 5 | cg01139508/cg15688<br>619/cg17536166/cg2<br>2598028/cg27607520                                          | 0.277848656 | 0.340552112 | 0.450679912 | 0.172831256 | 3.02E-06    | 1.86E-05    |
| UTR5 | ZNF671  | 19 | 58238987/5823892<br>8                                                                   | 2 | cg11977686/cg19246<br>110                                                                               | 0.266571018 | 0.393356944 | 0.579648984 | 0.313077966 | 5.62E-08    | 5.79E-07    |
| UTR5 | ZNF677  | 19 | 53758055/5375791<br>0/53757677/537580<br>31                                             | 4 | cg03217253/cg18335<br>068/cg21907914/cg2<br>4685755                                                     | 0.335146615 | 0.442322344 | 0.568818125 | 0.23367151  | 7.11E-08    | 7.13E-07    |
| UTR5 | ZNF772  | 19 | 57988860                                                                                | 1 | cg26929012                                                                                              | 0.085492994 | 0.170699922 | 0.28206878  | 0.196575786 | 1.47E-05    | 7.64E-05    |
| UTR5 | ZNF773  | 19 | 58011393/5801130<br>9/58011345                                                          | 3 | cg00757182/cg09555<br>914/cg22806837                                                                    | 0.039144991 | 0.141414265 | 0.224253849 | 0.185108858 | 0.000296824 | 0.001130958 |
| UTR5 | ZNF781  | 19 | 38183130/3818277<br>3/38182950/381800<br>21/38183210/38183<br>055                       | 6 | cg04784475/cg06940<br>614/cg09449030/cg1<br>7823234/cg22521696<br>/cg25875213                           | 0.127790987 | 0.181818997 | 0.328970448 | 0.20117946  | 0.000338656 | 0.001268912 |
| UTR5 | ZNF793  | 19 | 37998171/3799928<br>1/37997867/379979<br>91                                             | 4 | cg04818919/cg12283<br>916/cg15139588/cg1<br>8154014                                                     | 0.290045332 | 0.378452602 | 0.504859287 | 0.214813955 | 1.59E-06    | 1.05E-05    |
| UTR5 | ZNF804A | 2  | 185463132/185463<br>209/185463583/185<br>463588/185463218                               | 5 | cg00554682/cg13107<br>760/cg13536757/cg1<br>6573328/cg21245277                                          | 0.093647484 | 0.124077633 | 0.269781843 | 0.176134359 | 0.000321392 | 0.001211175 |
| UTR5 | ZNF813  | 19 | 53971035/5397392<br>0/53971464                                                          | 3 | cg12142445/cg22866<br>218/cg27264706                                                                    | 0.11934244  | 0.204465153 | 0.378819685 | 0.259477245 | 4.20E-05    | 0.000195457 |
| UTR5 | ZNF814  | 19 | 58400325/5840027<br>5                                                                   | 2 | cg15759937/cg24124<br>798                                                                               | 0.218604415 | 0.327995989 | 0.5074221   | 0.288817685 | 5.60E-07    | 4.21E-06    |

|       |          |    |                                                                            |   |                                                                                              |             |             |             |              |             |             |
|-------|----------|----|----------------------------------------------------------------------------|---|----------------------------------------------------------------------------------------------|-------------|-------------|-------------|--------------|-------------|-------------|
| UTR5  | ZNF829   | 19 | 37407060/3740704<br>1/37406349/374071<br>52/37406932/37406<br>949/37407123 | 7 | cg02370417/cg03584<br>288/cg09560297/cg1<br>5322783/cg15746891<br>/cg21292152/cg2405<br>2101 | 0.204806073 | 0.325622321 | 0.425634913 | 0.220828841  | 4.02E-05    | 0.000187652 |
| UTR5  | ZNF880   | 19 | 52873173                                                                   | 1 | cg03005603                                                                                   | 0.264131695 | 0.347941017 | 0.448765031 | 0.184633336  | 0.00027543  | 0.001056581 |
| UTR5  | ZSCAN18  | 19 | 58609269/5860947<br>3/58609361/586070<br>35/58609618/58609<br>602          | 6 | cg00370414/cg06243<br>556/cg21653184/cg2<br>1890309/cg22721334<br>/cg25784220                | 0.447807464 | 0.506429461 | 0.601717486 | 0.153910022  | 0.000176876 | 0.00071152  |
| UTR5  | ZSCAN23  | 6  | 28411271/2841103<br>0/28411240                                             | 3 | cg06818710/cg07838<br>603/cg13525197                                                         | 0.204968139 | 0.274659697 | 0.464516997 | 0.259548858  | 5.29E-07    | 4.02E-06    |
| EXON1 | A1CF     | 10 | 52645399/5264540<br>8                                                      | 2 | cg03817621/cg24411<br>946                                                                    | 0.63791302  | 0.522432422 | 0.415836795 | -0.222076225 | 2.68E-11    | 2.08E-09    |
| EXON1 | A2ML1    | 12 | 8975196/8975198                                                            | 2 | cg03490200/cg13863<br>204                                                                    | 0.798196353 | 0.682005733 | 0.605282773 | -0.19291358  | 5.85E-07    | 5.52E-06    |
| EXON1 | A4GNT    | 3  | 137851111                                                                  | 1 | cg17687282                                                                                   | 0.555490305 | 0.439574633 | 0.352429409 | -0.203060896 | 4.65E-08    | 6.18E-07    |
| EXON1 | ABCB5    | 7  | 20687223                                                                   | 1 | cg22066521                                                                                   | 0.840938375 | 0.707326378 | 0.538969    | -0.301969375 | 6.19E-12    | 7.73E-10    |
| EXON1 | ABCC11   | 16 | 48265760                                                                   | 1 | cg09228051                                                                                   | 0.527173005 | 0.33331525  | 0.231701973 | -0.295471032 | 8.37E-12    | 9.97E-10    |
| EXON1 | ABCC2    | 10 | 101542587                                                                  | 1 | cg14947634                                                                                   | 0.80488305  | 0.72094985  | 0.644778177 | -0.160104873 | 2.62E-04    | 0.001249793 |
| EXON1 | ABCC9    | 12 | 22089560                                                                   | 1 | cg20025970                                                                                   | 0.69504631  | 0.639950522 | 0.503078109 | -0.191968201 | 0.000783363 | 0.003331118 |
| EXON1 | ACAN     | 15 | 89346989/8934679<br>5                                                      | 2 | cg03184141/cg20510<br>724                                                                    | 0.3016413   | 0.409444617 | 0.493055441 | 0.191414141  | 2.26E-07    | 2.43E-06    |
| EXON1 | ACCSL    | 11 | 44069581                                                                   | 1 | cg23980760                                                                                   | 0.65016958  | 0.530142694 | 0.413524532 | -0.236645048 | 3.77E-11    | 2.64E-09    |
| EXON1 | ACER1    | 19 | 6333587/6333593/6<br>333547                                                | 3 | cg12999109/cg19598<br>519/cg25221254                                                         | 0.7483543   | 0.623571344 | 0.550758623 | -0.197595677 | 4.60E-09    | 9.04E-08    |
| EXON1 | ACSS3    | 12 | 81472177/8147193<br>8/81471882/814718<br>67/81472118/81471<br>884          | 6 | cg01283289/cg05143<br>887/cg10789281/cg1<br>3273396/cg24711649<br>/cg26272220                | 0.333184308 | 0.50958241  | 0.580906063 | 0.247721755  | 1.52E-07    | 1.73E-06    |
| EXON1 | ACTN2    | 1  | 236849942/236849<br>966/236849994                                          | 3 | cg11215976/cg18770<br>350/cg20482698                                                         | 0.455674445 | 0.51672723  | 0.614542092 | 0.158867647  | 5.04E-07    | 4.83E-06    |
| EXON1 | ADAM28   | 8  | 24151625                                                                   | 1 | cg22915945                                                                                   | 0.315348114 | 0.155805396 | 0.11973464  | -0.195613474 | 1.37E-07    | 1.58E-06    |
| EXON1 | ADAMTS16 | 5  | 5140646                                                                    | 1 | cg22784954                                                                                   | 0.491887775 | 0.589761867 | 0.707872386 | 0.215984611  | 5.30E-08    | 6.91E-07    |
| EXON1 | ADAMTS18 | 16 | 77468893/7746885<br>0                                                      | 2 | cg03238797/cg07568<br>194                                                                    | 0.242036425 | 0.243960726 | 0.416279982 | 0.174243557  | 0.000215896 | 0.001055074 |
| EXON1 | ADAMTS2  | 5  | 178772203                                                                  | 1 | cg05214690                                                                                   | 0.1248214   | 0.207791128 | 0.320605475 | 0.195784076  | 1.09E-06    | 9.64E-06    |
| EXON1 | ADAMTS20 | 12 | 43945680                                                                   | 1 | cg11751806                                                                                   | 0.336769935 | 0.441441006 | 0.572781686 | 0.236011751  | 9.48E-08    | 1.15E-06    |

|       |         |    |                                                                     |   |                                                                                              |             |             |             |              |          |          |
|-------|---------|----|---------------------------------------------------------------------|---|----------------------------------------------------------------------------------------------|-------------|-------------|-------------|--------------|----------|----------|
| EXON1 | ADAMTS5 | 21 | 28338836/2833785<br>7/28337869/283393 5<br>34/28339262              |   | cg03202077/cg08979<br>041/cg12078031/cg1<br>5237494/cg23986671                               | 0.375383208 | 0.462682385 | 0.618631833 | 0.243248625  | 1.98E-08 | 3.03E-07 |
| EXON1 | ADARB2  | 10 | 1779432/1779667                                                     | 2 | cg00467420/cg05307<br>923                                                                    | 0.152456797 | 0.280145489 | 0.436033709 | 0.283576912  | 4.02E-07 | 3.98E-06 |
| EXON1 | ADCY4   | 14 | 24803807                                                            | 1 | cg16761581                                                                                   | 0.166709615 | 0.198068025 | 0.323555559 | 0.156845975  | 6.77E-03 | 2.29E-02 |
| EXON1 | ADCY8   | 8  | 132052779/132052<br>702/132052044                                   | 3 | cg03120091/cg05229<br>355/cg12446629                                                         | 0.339781073 | 0.426269307 | 0.570765788 | 0.230984715  | 9.65E-10 | 2.53E-08 |
| EXON1 | ADCYAP1 | 18 | 905382/905450/904<br>963                                            | 3 | cg07211875/cg07376<br>535/cg11850773                                                         | 0.377236108 | 0.476772894 | 0.589408932 | 0.212172823  | 4.26E-09 | 8.48E-08 |
| EXON1 | ADH6    | 4  | 100140325/100140<br>396                                             | 2 | cg06518271/cg08988<br>543                                                                    | 0.581643105 | 0.443150483 | 0.352798286 | -0.228844819 | 6.58E-11 | 3.84E-09 |
| EXON1 | ADHFE1  | 8  | 67344720                                                            | 1 | cg20912169                                                                                   | 0.256459935 | 0.411193623 | 0.660422359 | 0.403962425  | 7.83E-11 | 4.17E-09 |
| EXON1 | ADIG    | 20 | 37209999/3720989<br>0                                               | 2 | cg14271690/cg17349<br>406                                                                    | 0.718053708 | 0.592508044 | 0.524476436 | -0.193577271 | 2.90E-09 | 6.04E-08 |
| EXON1 | ADRA1A  | 8  | 26721870/2672263<br>5/26721736/267228 5<br>61/26722496              |   | cg02409177/cg07645<br>844/cg09557462/cg1<br>7963840/cg21230493                               | 0.437989944 | 0.51766866  | 0.635304282 | 0.197314338  | 3.47E-08 | 4.89E-07 |
| EXON1 | ADRA2C  | 4  | 3769558/3769468/3<br>768458/3768638/37<br>69754/3768555/376<br>9810 | 7 | cg02086094/cg04167<br>239/cg04888241/cg0<br>6149034/cg10231049<br>/cg10235817/cg1324<br>4559 | 0.370857996 | 0.418502919 | 0.532037665 | 0.161179669  | 8.11E-10 | 2.24E-08 |
| EXON1 | AEBP1   | 7  | 44143998/4414443<br>4/44144360/441439 5<br>93/44144279              |   | cg02126753/cg06128<br>448/cg08739576/cg1<br>4249876/cg27493928                               | 0.14101586  | 0.261169783 | 0.450443613 | 0.309427753  | 1.39E-07 | 1.60E-06 |
| EXON1 | AGR2    | 7  | 16844606                                                            | 1 | cg21201572                                                                                   | 0.58272229  | 0.446446089 | 0.331783418 | -0.250938872 | 8.14E-12 | 9.97E-10 |
| EXON1 | AKR1B1  | 7  | 134143823                                                           | 1 | cg18416881                                                                                   | 0.146743665 | 0.255080443 | 0.329499074 | 0.18275541   | 3.48E-03 | 1.27E-02 |
| EXON1 | AKR1B10 | 7  | 134212463                                                           | 1 | cg25171118                                                                                   | 0.49394053  | 0.383134544 | 0.2866655   | -0.20727503  | 1.87E-10 | 7.41E-09 |
| EXON1 | AKR1C4  | 10 | 5238881                                                             | 1 | cg09272256                                                                                   | 0.60339281  | 0.527832572 | 0.434293668 | -0.169099142 | 1.01E-07 | 1.21E-06 |
| EXON1 | ALDH3B2 | 11 | 67442075/6744206<br>7                                               | 2 | cg07891457/cg20420<br>868                                                                    | 0.60026377  | 0.482674306 | 0.378574191 | -0.221689579 | 1.70E-10 | 7.02E-09 |
| EXON1 | ALK     | 2  | 30142990/3014437<br>6/30143585/301437 5<br>39/30144152              |   | cg02355885/cg06905<br>692/cg07443217/cg1<br>2976501/cg18277754                               | 0.264042581 | 0.363556944 | 0.467856574 | 0.203813992  | 6.02E-10 | 1.74E-08 |
| EXON1 | ALOX12B | 17 | 7990705/7990985                                                     | 2 | cg03742272/cg05952<br>715                                                                    | 0.754120235 | 0.663542361 | 0.559306527 | -0.194813708 | 1.12E-09 | 2.82E-08 |
| EXON1 | ALPI    | 2  | 233320854                                                           | 1 | cg08210297                                                                                   | 0.528081415 | 0.441415483 | 0.3559656   | -0.172115815 | 8.65E-10 | 2.34E-08 |
| EXON1 | ALPL    | 1  | 21835945                                                            | 1 | cg05364759                                                                                   | 0.215893632 | 0.240307554 | 0.424732568 | 0.208838937  | 3.99E-06 | 3.01E-05 |



|       |          |    |                                                      |   |                                                                |             |             |             |              |          |             |
|-------|----------|----|------------------------------------------------------|---|----------------------------------------------------------------|-------------|-------------|-------------|--------------|----------|-------------|
| EXON1 | ALPP     | 2  | 233243398                                            | 1 | cg19654061                                                     | 0.600517355 | 0.462496261 | 0.365646864 | -0.234870491 | 8.19E-11 | 4.31E-09    |
| EXON1 | ALX3     | 1  | 110613072                                            | 1 | cg05622465                                                     | 0.163861709 | 0.208511138 | 0.372320473 | 0.208458764  | 1.65E-04 | 0.000833103 |
| EXON1 | ALX4     | 11 | 44331629/4433157<br>7/44331362/443316<br>23          | 4 | cg02504416/cg04988<br>423/cg15817236/cg2<br>2931182            | 0.194598571 | 0.243938988 | 0.385977323 | 0.191378752  | 1.72E-05 | 0.000110777 |
| EXON1 | AMOTL1   | 11 | 94501636/9450171<br>8                                | 2 | cg09671810/cg11117<br>364                                      | 0.232078258 | 0.281349986 | 0.4418333   | 0.209755043  | 6.48E-04 | 0.002813595 |
| EXON1 | AMPH     | 7  | 38670957/3867098<br>7/38670985/386710<br>01          | 4 | cg02383130/cg07926<br>691/cg10293925/cg2<br>6122980            | 0.220771274 | 0.30209     | 0.49313757  | 0.272366296  | 4.26E-06 | 3.18E-05    |
| EXON1 | AMTN     | 4  | 71384359                                             | 1 | cg05329893                                                     | 0.581913015 | 0.491348928 | 0.376376132 | -0.205536883 | 1.07E-06 | 9.45E-06    |
| EXON1 | ANGPT2   | 8  | 6420726/6420242/6<br>420770/6420506                  | 4 | cg02402368/cg02548<br>132/cg03631656/cg2<br>4670715            | 0.420858167 | 0.479337611 | 0.591663792 | 0.170805626  | 1.73E-06 | 1.44E-05    |
| EXON1 | ANGPTL2  | 9  | 129884948                                            | 1 | cg13662634                                                     | 0.438163435 | 0.511000944 | 0.598008373 | 0.159844938  | 3.47E-10 | 1.15E-08    |
| EXON1 | ANK1     | 8  | 41754172/4152272<br>1/41754181/416550<br>78/41754060 | 5 | cg05166490/cg12439<br>423/cg17331296/cg2<br>6326633/cg26530758 | 0.358238866 | 0.433221078 | 0.510682627 | 0.152443761  | 1.19E-07 | 1.39E-06    |
| EXON1 | ANKLE1   | 19 | 17392656/1739277<br>0                                | 2 | cg00433770/cg27101<br>125                                      | 0.088966223 | 0.134141224 | 0.257005048 | 0.168038825  | 1.21E-03 | 0.004910921 |
| EXON1 | ANKRD30B | 18 | 14748439/1474828<br>5/14748298/147482<br>50          | 4 | cg02992546/cg03014<br>326/cg21281009/cg2<br>4061208            | 0.538124739 | 0.616041    | 0.721766368 | 0.183641629  | 1.35E-06 | 1.17E-05    |
| EXON1 | ANKRD33B | 5  | 10564690/1056444<br>8/10564514                       | 3 | cg01259029/cg07682<br>578/cg09877593                           | 0.060307918 | 0.132939988 | 0.281293543 | 0.220985625  | 2.46E-05 | 0.000151172 |
| EXON1 | ANKRD34C | 15 | 79575485/7957533<br>4                                | 2 | cg06015523/cg25456<br>849                                      | 0.516340225 | 0.635969644 | 0.737739055 | 0.22139883   | 2.06E-11 | 1.81E-09    |
| EXON1 | ANKRD55  | 5  | 55529124/5541257<br>2                                | 2 | cg11264935/cg22709<br>202                                      | 0.610293455 | 0.5384717   | 0.450503718 | -0.159789737 | 1.15E-07 | 1.36E-06    |
| EXON1 | ANKS4B   | 16 | 21245151                                             | 1 | cg26937434                                                     | 0.567352275 | 0.405970672 | 0.279589323 | -0.287762952 | 6.89E-11 | 3.86E-09    |
| EXON1 | ANO5     | 11 | 22214934/2221472<br>6                                | 2 | cg19639184/cg20115<br>218                                      | 0.162117194 | 0.239535159 | 0.344009078 | 0.181891884  | 1.53E-03 | 0.00607095  |
| EXON1 | ANP32C   | 4  | 165118829/165118<br>368                              | 2 | cg16244944/cg19400<br>238                                      | 0.713920753 | 0.617985136 | 0.563648559 | -0.150272193 | 2.41E-11 | 1.97E-09    |
| EXON1 | ANXA13   | 8  | 124749564                                            | 1 | cg00283535                                                     | 0.51764548  | 0.418693367 | 0.325426782 | -0.192218698 | 5.39E-10 | 1.61E-08    |
| EXON1 | ANXA9    | 1  | 150954826/150954<br>554                              | 2 | cg13320146/cg20437<br>604                                      | 0.51022676  | 0.410074872 | 0.3194991   | -0.19072766  | 7.53E-11 | 4.10E-09    |
| EXON1 | AOAH     | 7  | 36764019/3676414<br>0/36764082                       | 3 | cg14451276/cg18652<br>683/cg25733272                           | 0.549081075 | 0.630627097 | 0.711896268 | 0.162815193  | 1.18E-09 | 2.95E-08    |
| EXON1 | AOX1     | 2  | 201450731/201450<br>743                              | 2 | cg12627583/cg13875<br>120                                      | 0.148069937 | 0.191967324 | 0.30264263  | 0.154572693  | 4.46E-03 | 0.015799883 |
| EXON1 | APBB1IP  | 10 | 26727318                                             | 1 | cg05475934                                                     | 0.381048095 | 0.5482303   | 0.644688227 | 0.263640132  | 1.54E-09 | 3.65E-08    |

|       |          |    |                                                                                           |   |                                                                                                    |             |             |             |              |          |             |
|-------|----------|----|-------------------------------------------------------------------------------------------|---|----------------------------------------------------------------------------------------------------|-------------|-------------|-------------|--------------|----------|-------------|
| EXON1 | APCS     | 1  | 159557632                                                                                 | 1 | cg03856044                                                                                         | 0.480257805 | 0.425551878 | 0.307269341 | -0.172988464 | 7.47E-11 | 4.10E-09    |
| EXON1 | APOBEC3A | 22 | 39353650/39353550                                                                         | 2 | cg21345826/cg27504369                                                                              | 0.587978545 | 0.466772394 | 0.394652645 | -0.1933259   | 1.24E-09 | 3.06E-08    |
| EXON1 | AQP10    | 1  | 154293651                                                                                 | 1 | cg01359534                                                                                         | 0.53928651  | 0.470388844 | 0.383903682 | -0.155382828 | 1.41E-08 | 2.30E-07    |
| EXON1 | AQP5     | 12 | 50355995/50355307/50355821                                                                | 3 | cg04450003/cg15336765/cg23855989                                                                   | 0.482038021 | 0.539928161 | 0.664679767 | 0.182641746  | 6.85E-11 | 3.86E-09    |
| EXON1 | ARHGAP20 | 11 | 110583377                                                                                 | 1 | cg26578621                                                                                         | 0.14361743  | 0.229177771 | 0.37131297  | 0.22769554   | 4.07E-05 | 0.000236852 |
| EXON1 | ARHGDIB  | 12 | 15114494                                                                                  | 1 | cg10087172                                                                                         | 0.274435595 | 0.179145101 | 0.097067151 | -0.177368444 | 9.82E-08 | 1.18E-06    |
| EXON1 | ARL14    | 3  | 160395073/160395719/160395420                                                             | 3 | cg11896170/cg20725880/cg24147596                                                                   | 0.510067087 | 0.394944848 | 0.3051834   | -0.204883687 | 1.32E-12 | 3.13E-10    |
| EXON1 | ARMC3    | 10 | 23217017                                                                                  | 1 | cg15193782                                                                                         | 0.125462671 | 0.184802217 | 0.35818351  | 0.232720839  | 3.57E-05 | 0.000210463 |
| EXON1 | ASB10    | 7  | 150884003/150884641/150884848/150884429/150884914                                         | 5 | cg13289321/cg13594957/cg16537044/cg16564894/cg26159905                                             | 0.676565363 | 0.59461537  | 0.510523753 | -0.16604161  | 8.31E-11 | 4.31E-09    |
| EXON1 | ASB15    | 7  | 123249130                                                                                 | 1 | cg02300083                                                                                         | 0.61231217  | 0.532766017 | 0.371533668 | -0.240778502 | 4.45E-07 | 4.34E-06    |
| EXON1 | ASB17    | 1  | 76397847                                                                                  | 1 | cg17041296                                                                                         | 0.71839635  | 0.680643083 | 0.568250468 | -0.150145882 | 3.08E-04 | 0.001442789 |
| EXON1 | ASB4     | 7  | 95115354/95115289                                                                         | 2 | cg11554605/cg26847490                                                                              | 0.62529292  | 0.502638811 | 0.408500291 | -0.216792629 | 2.51E-10 | 9.14E-09    |
| EXON1 | ASCL1    | 12 | 103352235/103352326/103352000/103351987/103352694/103352294/103352454/103352267/103351855 | 9 | cg02246645/cg03700449/cg16712637/cg16921310/cg17015844/cg20718350/cg22356339/cg27420520/cg27569040 | 0.10422316  | 0.15695333  | 0.269524773 | 0.165301613  | 2.32E-05 | 0.000144054 |
| EXON1 | ASCL4    | 12 | 108169569/108168562/108169928/108168987/108168824/108169020/108170183/108169333           | 8 | cg01295392/cg01952953/cg01985833/cg04290586/cg13721169/cg20443254/cg23699926/cg24856726            | 0.505613222 | 0.609480159 | 0.716396462 | 0.21078324   | 1.36E-12 | 3.13E-10    |
| EXON1 | ASTN1    | 1  | 177133737/177133946/177133536/177133734/177134019/177133566                               | 6 | cg00319545/cg06650419/cg12268575/cg12907702/cg14659404/cg17105834                                  | 0.232585843 | 0.300357935 | 0.409380638 | 0.176794795  | 1.37E-07 | 1.58E-06    |
| EXON1 | ATP10A   | 15 | 26108084/26108263                                                                         | 2 | cg17793621/cg20174066                                                                              | 0.274127209 | 0.360125318 | 0.474313777 | 0.200186568  | 5.59E-08 | 7.23E-07    |
| EXON1 | ATP13A4  | 3  | 193272561/193272655                                                                       | 2 | cg05820087/cg09216823                                                                              | 0.459120505 | 0.357587378 | 0.275725277 | -0.183395228 | 3.53E-10 | 1.17E-08    |

|       |          |    |                                                                                           |   |                                                                                                         |             |             |             |              |             |             |
|-------|----------|----|-------------------------------------------------------------------------------------------|---|---------------------------------------------------------------------------------------------------------|-------------|-------------|-------------|--------------|-------------|-------------|
| EXON1 | ATP1B2   | 17 | 7554827/7554930/7<br>554666/7554357/75 6<br>54513/7554681                                 | 6 | cg00053373/cg00996<br>262/cg02705837/cg0<br>3554817/cg06200013<br>/cg22448889                           | 0.120678939 | 0.205364455 | 0.328424325 | 0.207745385  | 2.84E-06    | 2.23E-05    |
| EXON1 | AUTS2    | 7  | 69064884/6906486<br>8/69063971/690640 5<br>93/69064801                                    | 5 | cg00585733/cg08676<br>249/cg13234848/cg1<br>7027195/cg21393713                                          | 0.191128351 | 0.340246041 | 0.468972373 | 0.277844022  | 1.46E-06    | 1.24E-05    |
| EXON1 | B4GALT2  | 1  | 44446201                                                                                  | 1 | cg02416986                                                                                              | 0.578692005 | 0.510638594 | 0.420132314 | -0.158559691 | 2.96E-07    | 3.07E-06    |
| EXON1 | BAI1     | 8  | 143545949/143545<br>940/143545478/143<br>545789/143545574/<br>143545390                   | 6 | cg00713567/cg02478<br>907/cg03924566/cg0<br>9968723/cg14695492<br>/cg21210789                           | 0.33967415  | 0.404488839 | 0.493859428 | 0.154185278  | 2.33E-06    | 1.87E-05    |
| EXON1 | BAIAP2L2 | 22 | 38506623/3850658<br>9                                                                     | 2 | cg17838773/cg27505<br>627                                                                               | 0.585663558 | 0.461452011 | 0.364674816 | -0.220988742 | 5.72E-11    | 3.47E-09    |
| EXON1 | BARHL1   | 9  | 135458173/135458<br>625                                                                   | 2 | cg12622986/cg14375<br>461                                                                               | 0.290552243 | 0.358053772 | 0.48756932  | 0.197017078  | 1.39E-08    | 2.28E-07    |
| EXON1 | BARHL2   | 1  | 91182534/9118270<br>8/91182731/911822<br>88/91182215/91182 8<br>128/91182777/9118<br>2305 | 8 | cg01921432/cg06384<br>463/cg06959142/cg1<br>3486820/cg13975503<br>/cg15979173/cg1832<br>2569/cg26332310 | 0.349082339 | 0.386844012 | 0.539468922 | 0.190386583  | 9.16E-06    | 6.28E-05    |
| EXON1 | BCAT1    | 12 | 25102274/2510207<br>2                                                                     | 2 | cg04011247/cg10764<br>357                                                                               | 0.202790783 | 0.308302367 | 0.516316832 | 0.313526049  | 1.76E-09    | 4.04E-08    |
| EXON1 | BCL2L15  | 1  | 114429965/114430<br>031                                                                   | 2 | cg13801402/cg24550<br>026                                                                               | 0.494552815 | 0.351283019 | 0.268456568 | -0.226096247 | 3.11E-12    | 5.21E-10    |
| EXON1 | BEND4    | 4  | 42154840                                                                                  | 1 | cg10172669                                                                                              | 0.29211493  | 0.440483528 | 0.56288045  | 0.27076552   | 3.95E-08    | 5.44E-07    |
| EXON1 | BEND5    | 1  | 49242359/4924251<br>3/49242519                                                            | 3 | cg06744574/cg11666<br>087/cg16573178                                                                    | 0.07530915  | 0.259731009 | 0.33691097  | 0.26160182   | 5.14E-05    | 0.000293061 |
| EXON1 | BEST2    | 19 | 12863557                                                                                  | 1 | cg19743791                                                                                              | 0.656048925 | 0.50185895  | 0.384092309 | -0.271956616 | 1.15E-11    | 1.24E-09    |
| EXON1 | BFSP2    | 3  | 133118839/133118<br>940                                                                   | 2 | cg12354382/cg25249<br>068                                                                               | 0.63191017  | 0.508993228 | 0.392938859 | -0.238971311 | 4.83E-12    | 6.55E-10    |
| EXON1 | BIRC7    | 20 | 61867349/6186753<br>3                                                                     | 2 | cg00895528/cg17237<br>881                                                                               | 0.476063275 | 0.387165683 | 0.313177091 | -0.162886184 | 1.43E-08    | 2.32E-07    |
| EXON1 | BLK      | 8  | 11351571/1135184<br>6                                                                     | 2 | cg03860768/cg19882<br>315                                                                               | 0.64872187  | 0.556635978 | 0.453380141 | -0.195341729 | 1.52E-08    | 2.43E-07    |
| EXON1 | BMP10    | 2  | 69098569/6909827<br>2                                                                     | 2 | cg10976975/cg11308<br>639                                                                               | 0.75313066  | 0.702807206 | 0.579605368 | -0.173525292 | 3.46E-05    | 0.000204814 |
| EXON1 | BMP6     | 6  | 7727270                                                                                   | 1 | cg16392727                                                                                              | 0.126534887 | 0.229251004 | 0.328189528 | 0.201654641  | 0.002856053 | 0.010628053 |
| EXON1 | BPIL1    | 20 | 31595432/3159550<br>9                                                                     | 2 | cg08918845/cg08925<br>606                                                                               | 0.5670372   | 0.468596339 | 0.350106768 | -0.216930432 | 1.39E-12    | 3.13E-10    |
| EXON1 | BRDT     | 1  | 92415048/9241498<br>5/92415145                                                            | 3 | cg03136151/cg08172<br>037/cg09250199                                                                    | 0.88405712  | 0.780984089 | 0.702533286 | -0.181523834 | 1.60E-05    | 0.0001042   |

|       |           |    |                                                      |   |                                                                |             |             |             |              |             |             |
|-------|-----------|----|------------------------------------------------------|---|----------------------------------------------------------------|-------------|-------------|-------------|--------------|-------------|-------------|
| EXON1 | BRUNOL4   | 18 | 35145535/3514535<br>3/35145983/351454<br>73/35145650 | 5 | cg06761921/cg07300<br>558/cg11154070/cg1<br>8397864/cg19492446 | 0.214005816 | 0.26576577  | 0.401787196 | 0.18778138   | 2.62E-05    | 0.000160048 |
| EXON1 | BSX       | 11 | 122852284                                            | 1 | cg16167240                                                     | 0.40348509  | 0.487954133 | 0.636420345 | 0.232935255  | 4.60E-10    | 1.41E-08    |
| EXON1 | BTNL3     | 5  | 180415938                                            | 1 | cg02720155                                                     | 0.51763518  | 0.42233935  | 0.341113614 | -0.176521566 | 1.48E-07    | 1.69E-06    |
| EXON1 | BTNL8     | 5  | 180326186/180326<br>142                              | 2 | cg03723845/cg24024<br>214                                      | 0.531435345 | 0.419498567 | 0.334261309 | -0.197174036 | 2.30E-11    | 1.92E-09    |
| EXON1 | BVES      | 6  | 105584149/105584<br>216                              | 2 | cg20624391/cg25280<br>433                                      | 0.19679352  | 0.254422961 | 0.366656853 | 0.169863333  | 0.000714712 | 0.003062822 |
| EXON1 | C10orf90  | 10 | 128209980                                            | 1 | cg24143287                                                     | 0.67340542  | 0.465538717 | 0.322228568 | -0.351176852 | 1.91E-12    | 3.84E-10    |
| EXON1 | C10orf93  | 10 | 134755955                                            | 1 | cg23962250                                                     | 0.26105547  | 0.337518594 | 0.460069805 | 0.199014335  | 0.000211436 | 0.001036725 |
| EXON1 | C10orf96  | 10 | 118084109                                            | 1 | cg24407204                                                     | 0.66575674  | 0.546362117 | 0.49450745  | -0.17124929  | 1.43E-06    | 1.22E-05    |
| EXON1 | C10orf99  | 10 | 85933586                                             | 1 | cg10737718                                                     | 0.41991726  | 0.323038672 | 0.257776177 | -0.162141083 | 4.24E-11    | 2.84E-09    |
| EXON1 | C11orf41  | 11 | 33563946                                             | 1 | cg22937632                                                     | 0.678477485 | 0.593174794 | 0.471460355 | -0.20701713  | 1.13E-08    | 1.90E-07    |
| EXON1 | C11orf53  | 11 | 111126790                                            | 1 | cg19964761                                                     | 0.807520505 | 0.7183644   | 0.614021768 | -0.193498737 | 1.20E-05    | 8.00E-05    |
| EXON1 | C11orf87  | 11 | 109292894                                            | 1 | cg06719900                                                     | 0.405233015 | 0.474809478 | 0.586746568 | 0.181513553  | 2.75E-08    | 4.04E-07    |
| EXON1 | C11orf94  | 11 | 45928805                                             | 1 | cg04310460                                                     | 0.54808115  | 0.430428489 | 0.356957232 | -0.191123918 | 5.65E-11    | 3.45E-09    |
| EXON1 | C12orf56  | 12 | 64784177/6478417<br>3/64784252                       | 3 | cg04162059/cg13446<br>772/cg19998368                           | 0.313611043 | 0.367380625 | 0.513623067 | 0.200012023  | 2.80E-08    | 4.10E-07    |
| EXON1 | C12orf59  | 12 | 10331614/1033166<br>6                                | 2 | cg25494227/cg26718<br>420                                      | 0.6664606   | 0.575493056 | 0.485267255 | -0.181193345 | 4.23E-07    | 4.16E-06    |
| EXON1 | C12orf74  | 12 | 93096844                                             | 1 | cg25382573                                                     | 0.444039435 | 0.343317206 | 0.267986741 | -0.176052694 | 9.39E-10    | 2.49E-08    |
| EXON1 | C13orf38  | 13 | 36871878/3687196<br>2/36871948/368719<br>43          | 4 | cg04902286/cg13258<br>563/cg15167956/cg2<br>6439710            | 0.186418729 | 0.267530791 | 0.371579939 | 0.18516121   | 2.38E-05    | 0.000147161 |
| EXON1 | C16orf73  | 16 | 1922149/1922155                                      | 2 | cg05041351/cg07775<br>371                                      | 0.155952418 | 0.191239859 | 0.348454698 | 0.19250228   | 5.85E-06    | 4.21E-05    |
| EXON1 | C17orf104 | 17 | 42733994/4273397<br>6                                | 2 | cg21095561/cg22190<br>438                                      | 0.268131321 | 0.326896583 | 0.53463631  | 0.266504989  | 2.84E-07    | 2.96E-06    |
| EXON1 | C17orf105 | 17 | 41857926                                             | 1 | cg18515343                                                     | 0.733378725 | 0.646996922 | 0.527324627 | -0.206054098 | 7.69E-09    | 1.39E-07    |
| EXON1 | C17orf46  | 17 | 43339476                                             | 1 | cg17222164                                                     | 0.110370772 | 0.218942219 | 0.334238974 | 0.223868202  | 0.000188332 | 0.000934525 |
| EXON1 | C17orf47  | 17 | 56621448/5662157<br>8                                | 2 | cg11890622/cg26956<br>135                                      | 0.637106035 | 0.543989381 | 0.434952645 | -0.20215339  | 8.65E-10    | 2.34E-08    |
| EXON1 | C19orf21  | 19 | 751159                                               | 1 | cg14052044                                                     | 0.585568995 | 0.485448128 | 0.386443682 | -0.199125313 | 4.48E-10    | 1.38E-08    |
| EXON1 | C19orf33  | 19 | 38794845/3879481<br>4                                | 2 | cg00412772/cg11272<br>232                                      | 0.434242788 | 0.347337644 | 0.281336405 | -0.152906383 | 8.75E-10    | 2.37E-08    |
| EXON1 | C19orf75  | 19 | 51761116                                             | 1 | cg21930712                                                     | 0.50822113  | 0.406950344 | 0.293409632 | -0.214811498 | 2.13E-11    | 1.85E-09    |
| EXON1 | C1orf114  | 1  | 169396635/169396<br>637                              | 2 | cg00100121/cg13958<br>426                                      | 0.12173728  | 0.250425353 | 0.371139035 | 0.249401754  | 2.96E-05    | 0.000178824 |
| EXON1 | C1orf173  | 1  | 75139347/7513936<br>4                                | 2 | cg24155871/cg27393<br>126                                      | 0.295957565 | 0.367192178 | 0.573761716 | 0.277804151  | 1.35E-07    | 1.56E-06    |
| EXON1 | C1orf190  | 1  | 46669221                                             | 1 | cg15696662                                                     | 0.304778516 | 0.346362061 | 0.460521201 | 0.155742685  | 0.004869277 | 0.017072798 |

|       |           |    |                                                                |   |                                                                              |             |             |             |              |             |             |
|-------|-----------|----|----------------------------------------------------------------|---|------------------------------------------------------------------------------|-------------|-------------|-------------|--------------|-------------|-------------|
| EXON1 | C1orf70   | 1  | 1475675/1475737                                                | 2 | cg16306898/cg16601494                                                        | 0.134715278 | 0.32452273  | 0.606946738 | 0.472231459  | 6.77E-11    | 3.86E-09    |
| EXON1 | C1orf94   | 1  | 34642862/34642899/34632658/34642745/34642609/34643106/34642605 | 7 | cg04025150/cg04323427/cg09270225/cg13329248/cg16348470/cg18328755/cg22697574 | 0.375496506 | 0.460387739 | 0.595330099 | 0.219833593  | 2.03E-10    | 7.89E-09    |
| EXON1 | C1QC      | 1  | 22970132                                                       | 1 | cg17104151                                                                   | 0.46445252  | 0.340469811 | 0.226817273 | -0.237635247 | 5.28E-13    | 1.76E-10    |
| EXON1 | C1QL1     | 17 | 43045368/43045014/43045372/43045386/43045068                   | 5 | cg03385864/cg04819499/cg13818573/cg15891422/cg19226007                       | 0.184384351 | 0.250416889 | 0.353737757 | 0.169353406  | 2.05E-05    | 0.000129091 |
| EXON1 | C1QL2     | 2  | 119916017/119915729/119915368/119915783/119916431              | 5 | cg00690148/cg10996058/cg15089219/cg20470857/cg26530498                       | 0.339145462 | 0.416204746 | 0.524014235 | 0.184868773  | 3.99E-10    | 1.28E-08    |
| EXON1 | C1QL3     | 10 | 16563821/16562917/16563586/16562626/16562998                   | 5 | cg10982433/cg11880855/cg15345154/cg24037897/cg25104555                       | 0.106647108 | 0.180994227 | 0.363638429 | 0.256991321  | 6.55E-06    | 4.66E-05    |
| EXON1 | C1QTNF5   | 11 | 119217331                                                      | 1 | cg09186818                                                                   | 0.48301678  | 0.414818267 | 0.315081205 | -0.167935575 | 1.64E-09    | 3.80E-08    |
| EXON1 | C20orf103 | 20 | 9495495/9495326/9495404                                        | 3 | cg12650655/cg20191310/cg26582643                                             | 0.155063925 | 0.172190491 | 0.307051689 | 0.151987763  | 0.005606782 | 0.019401547 |
| EXON1 | C20orf186 | 20 | 31669392                                                       | 1 | cg04087207                                                                   | 0.476719275 | 0.355235783 | 0.264749995 | -0.21196928  | 1.47E-11    | 1.45E-09    |
| EXON1 | C20orf200 | 20 | 61148684                                                       | 1 | cg00499838                                                                   | 0.182461058 | 0.260689047 | 0.378726132 | 0.196265074  | 1.15E-05    | 7.72E-05    |
| EXON1 | C20orf71  | 20 | 31805291/31805182                                              | 2 | cg09742177/cg15131258                                                        | 0.67492102  | 0.584522178 | 0.477997677 | -0.196923343 | 2.99E-05    | 0.000180139 |
| EXON1 | C2orf74   | 2  | 61372316/61372256                                              | 2 | cg10580144/cg18158151                                                        | 0.310297213 | 0.508793317 | 0.667898914 | 0.357601701  | 4.61E-12    | 6.53E-10    |
| EXON1 | C2orf90   | 2  | 903676                                                         | 1 | cg09613130                                                                   | 0.83853972  | 0.775605406 | 0.631398655 | -0.207141065 | 1.39E-05    | 9.14E-05    |
| EXON1 | C3AR1     | 12 | 8218922                                                        | 1 | cg09238677                                                                   | 0.39392092  | 0.260403385 | 0.177022935 | -0.216897985 | 4.71E-08    | 6.24E-07    |
| EXON1 | C3orf22   | 3  | 126277693                                                      | 1 | cg24389347                                                                   | 0.61844124  | 0.53159915  | 0.418475436 | -0.199965804 | 9.89E-09    | 1.71E-07    |
| EXON1 | C4BPB     | 1  | 207262706                                                      | 1 | cg26407558                                                                   | 0.34993362  | 0.263663656 | 0.197965268 | -0.151968352 | 1.57E-13    | 7.71E-11    |
| EXON1 | C4orf39   | 4  | 165878742/165878219/165878136/165878317                        | 4 | cg03508095/cg08992305/cg11630554/cg13684141                                  | 0.110093365 | 0.199651663 | 0.266455738 | 0.156362372  | 0.001948892 | 0.007573998 |
| EXON1 | C4orf49   | 4  | 140201433/140201262                                            | 2 | cg18065318/cg20710842                                                        | 0.1592298   | 0.219469219 | 0.337969581 | 0.178739781  | 3.57E-05    | 0.00021047  |
| EXON1 | C6orf105  | 6  | 11778902/11779039                                              | 2 | cg14178895/cg26761744                                                        | 0.471314278 | 0.342208347 | 0.284761011 | -0.186553266 | 2.10E-10    | 8.12E-09    |
| EXON1 | C7orf52   | 7  | 100823377/100823400                                            | 2 | cg14562712/cg19828791                                                        | 0.218592698 | 0.287711292 | 0.3996654   | 0.181072703  | 0.000297605 | 0.001400077 |
| EXON1 | C7orf72   | 7  | 50136102                                                       | 1 | cg09857577                                                                   | 0.506747495 | 0.374728667 | 0.237272214 | -0.269475281 | 1.51E-12    | 3.13E-10    |

|       |           |    |                                                                                         |   |                                                                                                         |             |             |             |              |             |             |
|-------|-----------|----|-----------------------------------------------------------------------------------------|---|---------------------------------------------------------------------------------------------------------|-------------|-------------|-------------|--------------|-------------|-------------|
| EXON1 | C8orf34   | 8  | 69351585/6935092<br>7                                                                   | 2 | cg00280504/cg22199<br>118                                                                               | 0.331943675 | 0.235495517 | 0.18020561  | -0.151738065 | 3.21E-11    | 2.36E-09    |
| EXON1 | C8orf46   | 8  | 67405742                                                                                | 1 | cg23704362                                                                                              | 0.666288825 | 0.594698256 | 0.515657332 | -0.150631493 | 1.50E-05    | 9.80E-05    |
| EXON1 | C8orf85   | 8  | 117950504/117950<br>473                                                                 | 2 | cg04271218/cg05996<br>052                                                                               | 0.378524738 | 0.489477106 | 0.632894352 | 0.254369615  | 7.95E-13    | 2.34E-10    |
| EXON1 | C9orf129  | 9  | 96108467                                                                                | 1 | cg10065823                                                                                              | 0.36883572  | 0.460165744 | 0.576210927 | 0.207375207  | 7.11E-07    | 6.58E-06    |
| EXON1 | C9orf144B | 9  | 34729282/3472935<br>5                                                                   | 2 | cg09187598/cg14598<br>211                                                                               | 0.819016255 | 0.76346715  | 0.643566423 | -0.175449832 | 2.19E-06    | 1.77E-05    |
| EXON1 | C9orf152  | 9  | 112970404                                                                               | 1 | cg09596614                                                                                              | 0.476353965 | 0.383152094 | 0.307880405 | -0.16847356  | 3.32E-10    | 1.12E-08    |
| EXON1 | C9orf47   | 9  | 91605893/9160599<br>9                                                                   | 2 | cg12972233/cg20083<br>676                                                                               | 0.437742505 | 0.562415053 | 0.589325675 | 0.15158317   | 4.62E-06    | 3.43E-05    |
| EXON1 | C9orf50   | 9  | 132383003/132382<br>812/132382433                                                       | 3 | cg09731694/cg13405<br>887/cg14015706                                                                    | 0.231429344 | 0.52166887  | 0.667683026 | 0.436253682  | 4.86E-16    | 6.43E-12    |
| EXON1 | CA10      | 17 | 50236087/5023532<br>8/50235737/502353<br>93/50236765/50235<br>965/50235279/5023<br>7315 | 8 | cg08034077/cg14054<br>928/cg14073722/cg2<br>0405017/cg21328033<br>/cg22702328/cg2434<br>1611/cg25592977 | 0.427952226 | 0.501691851 | 0.638853658 | 0.210901432  | 5.56E-10    | 1.65E-08    |
| EXON1 | CA9       | 9  | 35674000                                                                                | 1 | cg20610181                                                                                              | 0.560768595 | 0.46196675  | 0.385375305 | -0.17539329  | 1.71E-07    | 1.91E-06    |
| EXON1 | CACNA1A   | 19 | 13617012/1361709<br>4/13616871/136170<br>91                                             | 4 | cg17509220/cg17509<br>967/cg22187630/cg2<br>2491927                                                     | 0.31954001  | 0.413770184 | 0.546276039 | 0.226736029  | 6.72E-07    | 6.25E-06    |
| EXON1 | CACNG3    | 16 | 24267226/2426739<br>9/24267559/242675<br>26/24266905                                    | 5 | cg02692912/cg04441<br>477/cg04543289/cg0<br>7514158/cg17234150                                          | 0.338346394 | 0.442153518 | 0.596171655 | 0.257825261  | 2.71E-09    | 5.69E-08    |
| EXON1 | CACNG8    | 19 | 54466297/5446653<br>8/54466441                                                          | 3 | cg08653692/cg22049<br>569/cg24415208                                                                    | 0.344097342 | 0.443230114 | 0.651466188 | 0.307368846  | 3.14E-10    | 1.08E-08    |
| EXON1 | CADM2     | 3  | 85008678/8500858<br>7/85008786/850081<br>56                                             | 4 | cg05152589/cg13331<br>200/cg22380921/cg2<br>6113636                                                     | 0.306559718 | 0.336317308 | 0.462555287 | 0.155995569  | 1.36E-06    | 1.18E-05    |
| EXON1 | CALCB     | 11 | 15095178                                                                                | 1 | cg23558842                                                                                              | 0.303237325 | 0.309508378 | 0.475860182 | 0.172622857  | 0.003155125 | 0.011636146 |
| EXON1 | CALML4    | 15 | 68498251/6849799<br>2                                                                   | 2 | cg05338167/cg11530<br>995                                                                               | 0.45808637  | 0.373735086 | 0.304724143 | -0.153362227 | 6.76E-11    | 3.86E-09    |
| EXON1 | CALN1     | 7  | 71801793/7187711<br>3/71802184/718771<br>55/71877237                                    | 5 | cg05223720/cg10928<br>348/cg17239236/cg1<br>7932934/cg21003606                                          | 0.31873279  | 0.456246006 | 0.562331473 | 0.243598683  | 2.04E-09    | 4.54E-08    |
| EXON1 | CAPN8     | 1  | 223853145                                                                               | 1 | cg19249749                                                                                              | 0.867833045 | 0.762871883 | 0.662754586 | -0.205078459 | 5.48E-05    | 0.000310349 |
| EXON1 | CARD11    | 7  | 3083541/3083333/3<br>083338                                                             | 3 | cg14549249/cg16842<br>053/cg26937500                                                                    | 0.125202067 | 0.265370706 | 0.413698738 | 0.288496671  | 4.40E-06    | 3.28E-05    |

|       |         |    |                                                                                                  |   |                                                                                                                        |             |             |             |              |             |             |
|-------|---------|----|--------------------------------------------------------------------------------------------------|---|------------------------------------------------------------------------------------------------------------------------|-------------|-------------|-------------|--------------|-------------|-------------|
| EXON1 | CARD6   | 5  | 40841590/4084157<br>9/40841493                                                                   | 3 | cg05981038/cg16250<br>754/cg26818786                                                                                   | 0.485350275 | 0.404721856 | 0.264265357 | -0.221084918 | 1.37E-06    | 1.18E-05    |
| EXON1 | CASS4   | 20 | 54987330                                                                                         | 1 | cg10463299                                                                                                             | 0.537502275 | 0.622229189 | 0.705192095 | 0.16768982   | 2.64E-07    | 2.76E-06    |
| EXON1 | CBLN2   | 18 | 70211515                                                                                         | 1 | cg21902544                                                                                                             | 0.273541708 | 0.40733855  | 0.624527209 | 0.350985502  | 2.53E-09    | 5.39E-08    |
| EXON1 | CBLN4   | 20 | 54579084/5457935<br>5/54579814                                                                   | 3 | cg01729827/cg02501<br>779/cg14184078                                                                                   | 0.484643977 | 0.508003546 | 0.681354433 | 0.196710457  | 9.32E-10    | 2.48E-08    |
| EXON1 | CCDC105 | 19 | 15122142/1512159<br>1/15122135/151215<br>96/15122181/15121<br>913                                | 6 | cg02241330/cg03928<br>546/cg04768697/cg0<br>6522681/cg14884776<br>/cg18721420                                          | 0.373889938 | 0.45019532  | 0.586352816 | 0.212462878  | 4.27E-10    | 1.34E-08    |
| EXON1 | CCDC114 | 19 | 48823178                                                                                         | 1 | cg25533551                                                                                                             | 0.57711474  | 0.477702278 | 0.392349423 | -0.184765317 | 9.75E-11    | 4.75E-09    |
| EXON1 | CCDC140 | 2  | 223162881/223163<br>033/223162875                                                                | 3 | cg06916239/cg23546<br>474/cg25596297                                                                                   | 0.422570955 | 0.382108772 | 0.580172291 | 0.157601336  | 0.006122858 | 0.020962548 |
| EXON1 | CCDC36  | 3  | 49236946                                                                                         | 1 | cg03540175                                                                                                             | 0.61096671  | 0.660020428 | 0.798652814 | 0.187686104  | 9.92E-10    | 2.58E-08    |
| EXON1 | CCDC37  | 3  | 126113784                                                                                        | 1 | cg00891278                                                                                                             | 0.319879045 | 0.361500828 | 0.544311159 | 0.224432114  | 4.67E-06    | 3.46E-05    |
| EXON1 | CCDC42  | 17 | 8647944/8648035                                                                                  | 2 | cg06468695/cg10057<br>436                                                                                              | 0.7384243   | 0.602032211 | 0.476622014 | -0.261802286 | 5.68E-12    | 7.30E-10    |
| EXON1 | CCDC54  | 3  | 107097413                                                                                        | 1 | cg15507901                                                                                                             | 0.576766305 | 0.438565783 | 0.374125105 | -0.2026412   | 1.27E-07    | 1.47E-06    |
| EXON1 | CCKBR   | 11 | 6281180/6280988/6<br>281197/6281235/62<br>81104                                                  | 5 | cg01487187/cg06646<br>346/cg20209956/cg2<br>1957616/cg26686277                                                         | 0.111458803 | 0.146587496 | 0.286460796 | 0.175001993  | 0.000290053 | 0.001369908 |
| EXON1 | CCL1    | 17 | 32690127                                                                                         | 1 | cg20556988                                                                                                             | 0.7418272   | 0.594454389 | 0.491574041 | -0.250253159 | 3.51E-08    | 4.94E-07    |
| EXON1 | CCL20   | 2  | 228678693                                                                                        | 1 | cg21643045                                                                                                             | 0.589008875 | 0.466751633 | 0.372675441 | -0.216333434 | 1.07E-11    | 1.20E-09    |
| EXON1 | CCNA1   | 13 | 37006063/3700612<br>7/37006265/370067<br>48/37006611/37006<br>734/37006107/3700<br>6116/37006133 | 9 | cg02478448/cg05137<br>358/cg10158541/cg1<br>2571423/cg13060997<br>/cg16422907/cg1834<br>8647/cg18948722/cg<br>26984343 | 0.423211149 | 0.540206756 | 0.67690676  | 0.253695611  | 9.77E-13    | 2.68E-10    |
| EXON1 | CCT8L2  | 22 | 17073594                                                                                         | 1 | cg07443748                                                                                                             | 0.56714542  | 0.458567933 | 0.362340368 | -0.204805052 | 3.14E-11    | 2.33E-09    |
| EXON1 | CD226   | 18 | 67624071                                                                                         | 1 | cg13164537                                                                                                             | 0.54714104  | 0.614850244 | 0.710015336 | 0.162874296  | 3.58E-10    | 1.17E-08    |
| EXON1 | CD34    | 1  | 208084456/208084<br>415/208084640/208<br>084436                                                  | 4 | cg04292718/cg16115<br>720/cg19591881/cg2<br>1455438                                                                    | 0.238943501 | 0.37336436  | 0.543432812 | 0.304489311  | 2.42E-09    | 5.20E-08    |
| EXON1 | CD38    | 4  | 15779999/1578001<br>1/15780238                                                                   | 3 | cg02183671/cg24819<br>835/cg26043257                                                                                   | 0.21345019  | 0.439392783 | 0.552727605 | 0.339277415  | 6.81E-09    | 1.26E-07    |
| EXON1 | CD40    | 20 | 44746944/4474700<br>6                                                                            | 2 | cg01943874/cg21601<br>405                                                                                              | 0.20207869  | 0.279558925 | 0.410242973 | 0.208164283  | 2.28E-06    | 1.83E-05    |

|       |       |    |                                                                                                  |   |                                                                                                                        |             |             |             |             |             |             |
|-------|-------|----|--------------------------------------------------------------------------------------------------|---|------------------------------------------------------------------------------------------------------------------------|-------------|-------------|-------------|-------------|-------------|-------------|
| EXON1 | CDH10 | 5  | 24644878                                                                                         | 1 | cg00068408                                                                                                             | 0.188328965 | 0.251849002 | 0.367313545 | 0.17898458  | 0.000262701 | 0.001253706 |
| EXON1 | CDH12 | 5  | 22853730/2285370<br>3/22853464                                                                   | 3 | cg10303842/cg18394<br>953/cg26227411                                                                                   | 0.289133825 | 0.333335681 | 0.461759328 | 0.172625503 | 0.000135084 | 0.000692108 |
| EXON1 | CDH13 | 16 | 82660630/8266072<br>7/82660596/826606<br>70                                                      | 4 | cg01301138/cg05374<br>412/cg05949171/cg0<br>8747377                                                                    | 0.213631258 | 0.243126457 | 0.375924352 | 0.162293094 | 0.001413874 | 0.005667923 |
| EXON1 | CDH18 | 5  | 19988200/1998828<br>8                                                                            | 2 | cg06076122/cg06781<br>712                                                                                              | 0.272073128 | 0.394306767 | 0.572143656 | 0.300070528 | 1.14E-07    | 1.35E-06    |
| EXON1 | CDH2  | 18 | 25757211/2575743<br>8/25757202                                                                   | 3 | cg09313439/cg12208<br>258/cg13464915                                                                                   | 0.291554003 | 0.338988742 | 0.495758347 | 0.204204344 | 1.28E-05    | 8.50E-05    |
| EXON1 | CDH8  | 16 | 62070005                                                                                         | 1 | cg09515947                                                                                                             | 0.33996726  | 0.47995985  | 0.651866577 | 0.311899317 | 4.34E-11    | 2.88E-09    |
| EXON1 | CDO1  | 5  | 115152019/115152<br>386/115152326                                                                | 3 | cg07405021/cg12880<br>658/cg16265906                                                                                   | 0.245180578 | 0.397157344 | 0.52278282  | 0.277602243 | 6.74E-08    | 8.51E-07    |
| EXON1 | CHAT  | 10 | 50822175/5081721<br>3/50821161/508221<br>58/50822391                                             | 5 | cg00586644/cg06108<br>782/cg11811216/cg2<br>0405893/cg26473651                                                         | 0.22912098  | 0.286928603 | 0.436374917 | 0.207253937 | 3.90E-07    | 3.88E-06    |
| EXON1 | CHODL | 21 | 19617439                                                                                         | 1 | cg21350575                                                                                                             | 0.49047568  | 0.565352933 | 0.691209159 | 0.200733479 | 2.36E-11    | 1.95E-09    |
| EXON1 | CHRM1 | 11 | 62688751/6268874<br>8                                                                            | 2 | cg00987015/cg03360<br>907                                                                                              | 0.522923135 | 0.447229633 | 0.363043625 | -0.15987951 | 6.11E-10    | 1.76E-08    |
| EXON1 | CHRM2 | 7  | 136553595/136553<br>882/136553855/136<br>554160/136553682/<br>136553868/136553<br>884/136553728  | 8 | cg00973677/cg07664<br>198/cg08323651/cg2<br>0847733/cg22471517<br>/cg24228819/cg2457<br>5234/cg25632105                | 0.330892161 | 0.431609421 | 0.583658591 | 0.25276643  | 2.42E-12    | 4.39E-10    |
| EXON1 | CHST2 | 3  | 142838847/142838<br>938/142839022/142<br>838682                                                  | 4 | cg00995327/cg08858<br>437/cg09638407/cg1<br>7815252                                                                    | 0.088903637 | 0.191432253 | 0.350789196 | 0.261885559 | 2.35E-06    | 1.89E-05    |
| EXON1 | CIDEA | 18 | 12254690/1225436<br>5/12254377                                                                   | 3 | cg00590620/cg15063<br>116/cg20950011                                                                                   | 0.29549468  | 0.381982467 | 0.449232986 | 0.153738306 | 6.59E-05    | 0.000365133 |
| EXON1 | CLDN5 | 22 | 19511707/1951271<br>2/19512084/195119<br>87/19512320/19510<br>877/19511967/1951<br>2228/19510977 | 9 | cg00811132/cg04463<br>638/cg06315607/cg0<br>9092054/cg09446908<br>/cg17411190/cg1757<br>7122/cg20486569/cg<br>21872764 | 0.223979252 | 0.274254651 | 0.411113158 | 0.187133906 | 1.15E-07    | 1.36E-06    |



|       |         |    |                                                                                                               |    |                                                                                                                                       |             |             |             |              |             |             |
|-------|---------|----|---------------------------------------------------------------------------------------------------------------|----|---------------------------------------------------------------------------------------------------------------------------------------|-------------|-------------|-------------|--------------|-------------|-------------|
| EXON1 | CLEC14A | 14 | 38725536/3872467<br>5/38724255/387253<br>12/38723500/38724<br>648/38724945                                    | 7  | cg04681600/cg05057<br>720/cg06284231/cg0<br>8139247/cg16125874<br>/cg16404157/cg2328<br>8059                                          | 0.496551778 | 0.5404342   | 0.649950598 | 0.15339882   | 1.56E-07    | 1.76E-06    |
| EXON1 | CLEC2L  | 7  | 139208852                                                                                                     | 1  | cg08832906                                                                                                                            | 0.360356285 | 0.359281556 | 0.511563559 | 0.151207274  | 0.002696784 | 0.010106448 |
| EXON1 | CLEC4G  | 19 | 7797031/7797052                                                                                               | 2  | cg16626670/cg19001<br>261                                                                                                             | 0.557977435 | 0.466949472 | 0.397688936 | -0.160288499 | 1.98E-10    | 7.76E-09    |
| EXON1 | CLEC4M  | 19 | 7828144                                                                                                       | 1  | cg21372914                                                                                                                            | 0.669008555 | 0.59473485  | 0.472102182 | -0.196906373 | 7.13E-07    | 6.59E-06    |
| EXON1 | CLEC7A  | 12 | 10282621                                                                                                      | 1  | cg26066361                                                                                                                            | 0.587201725 | 0.487356139 | 0.373359232 | -0.213842493 | 4.60E-06    | 3.42E-05    |
| EXON1 | CLIC6   | 21 | 36042752/3604234<br>4/36042224/360416<br>99/36042464/36042<br>170                                             | 6  | cg02488385/cg04125<br>350/cg04497512/cg1<br>0722799/cg12742338<br>/cg17935217                                                         | 0.476268398 | 0.52168884  | 0.654676344 | 0.178407947  | 0.000176199 | 0.000880597 |
| EXON1 | CLIP4   | 2  | 29338432                                                                                                      | 1  | cg08808128                                                                                                                            | 0.152998709 | 0.321004766 | 0.562527791 | 0.409529082  | 1.97E-11    | 1.77E-09    |
| EXON1 | CLLU1   | 12 | 92818240                                                                                                      | 1  | cg13003571                                                                                                                            | 0.857301425 | 0.694630783 | 0.60484675  | -0.252454675 | 1.50E-09    | 3.56E-08    |
| EXON1 | CLPS    | 6  | 35765093                                                                                                      | 1  | cg01670608                                                                                                                            | 0.617996745 | 0.516676956 | 0.4087381   | -0.209258645 | 3.20E-10    | 1.09E-08    |
| EXON1 | CLRN3   | 10 | 129690850                                                                                                     | 1  | cg20424781                                                                                                                            | 0.589042825 | 0.441748633 | 0.349449841 | -0.239592984 | 3.54E-11    | 2.52E-09    |
| EXON1 | CLVS2   | 6  | 123317714/123317<br>875                                                                                       | 2  | cg18210226/cg24728<br>018                                                                                                             | 0.21959894  | 0.268317521 | 0.382576382 | 0.162977442  | 0.000169222 | 0.000849816 |
| EXON1 | CMTM3   | 16 | 66638320/6663859<br>9/66638702/666384<br>07/66638396/66638<br>438/66638412/6663<br>8293/66638433/666<br>38210 | 10 | cg00355909/cg03860<br>859/cg06314872/cg0<br>6445928/cg08601917<br>/cg08682544/cg0923<br>3013/cg23297477/cg<br>26560414/cg2665872<br>8 | 0.110735955 | 0.28202328  | 0.429371915 | 0.31863596   | 1.64E-08    | 2.57E-07    |
| EXON1 | CNGA3   | 2  | 98962900/9896297<br>4                                                                                         | 2  | cg18404308/cg19671<br>120                                                                                                             | 0.331170344 | 0.394459683 | 0.577932857 | 0.246762513  | 5.73E-09    | 1.09E-07    |
| EXON1 | CNGB3   | 8  | 87755844                                                                                                      | 1  | cg21221571                                                                                                                            | 0.71771295  | 0.659968667 | 0.5530391   | -0.16467385  | 7.15E-05    | 0.00039234  |
| EXON1 | CNRIP1  | 2  | 68546899/6854668<br>8/68546507/685470<br>88/68547141/68546<br>467/68547052/6854<br>6579                       | 8  | cg00020052/cg04020<br>079/cg07080358/cg0<br>7594636/cg08157672<br>/cg11573679/cg1531<br>3459/cg24171907                               | 0.217559235 | 0.445870725 | 0.58209091  | 0.364531675  | 8.42E-10    | 2.32E-08    |
| EXON1 | CNTN1   | 12 | 41086365                                                                                                      | 1  | cg08990926                                                                                                                            | 0.200349787 | 0.302127793 | 0.453710018 | 0.253360231  | 3.30E-06    | 2.55E-05    |
| EXON1 | CNTNAP2 | 7  | 145814003/145813<br>915/145813946/145<br>813494                                                               | 4  | cg05422683/cg07612<br>562/cg16521917/cg2<br>4887139                                                                                   | 0.255183548 | 0.334700622 | 0.482120427 | 0.22693688   | 1.90E-09    | 4.29E-08    |
| EXON1 | CNTNAP4 | 16 | 76311266                                                                                                      | 1  | cg26577454                                                                                                                            | 0.127225389 | 0.143523389 | 0.282300908 | 0.15507552   | 0.007209683 | 0.024281287 |

|       |            |    |                                                             |   |                                                                   |             |             |             |              |             |             |
|-------|------------|----|-------------------------------------------------------------|---|-------------------------------------------------------------------|-------------|-------------|-------------|--------------|-------------|-------------|
| EXON1 | CNTNAP5    | 2  | 124783243/124782885/124783254                               | 3 | cg01308258/cg11344566/cg16198087                                  | 0.349953968 | 0.431409758 | 0.560647352 | 0.210693385  | 1.25E-08    | 2.07E-07    |
| EXON1 | COL22A1    | 8  | 139926188                                                   | 1 | cg12304113                                                        | 0.17062913  | 0.248627404 | 0.343433726 | 0.172804596  | 8.91E-06    | 6.15E-05    |
| EXON1 | COL23A1    | 5  | 178017376/178017260/178017300                               | 3 | cg20546002/cg22960186/cg25552435                                  | 0.102119519 | 0.195361626 | 0.290433439 | 0.18831392   | 0.000642465 | 0.002790271 |
| EXON1 | COL24A1    | 1  | 86622113                                                    | 1 | cg12644264                                                        | 0.141704516 | 0.22757463  | 0.38242285  | 0.240718334  | 4.56E-05    | 0.000262689 |
| EXON1 | COL25A1    | 4  | 110223646/110223713/110223700/110223795/110223429/110223598 | 6 | cg02441747/cg06468908/cg10074544/cg11935021/cg19039028/cg25088758 | 0.256102573 | 0.356471273 | 0.53354126  | 0.277438687  | 3.02E-08    | 4.35E-07    |
| EXON1 | COL5A1     | 9  | 137533851/137533949                                         | 2 | cg14252519/cg26024843                                             | 0.33844217  | 0.423000736 | 0.548963739 | 0.210521569  | 8.50E-08    | 1.05E-06    |
| EXON1 | COL8A2     | 1  | 36565739/36565772                                           | 2 | cg15818357/cg18931815                                             | 0.555285925 | 0.438568967 | 0.331806073 | -0.223479852 | 1.40E-12    | 3.13E-10    |
| EXON1 | CPA4       | 7  | 129933014                                                   | 1 | cg01796223                                                        | 0.58549644  | 0.538058156 | 0.374964577 | -0.210531863 | 1.29E-06    | 1.12E-05    |
| EXON1 | CPB2       | 13 | 46679081                                                    | 1 | cg14662172                                                        | 0.886822105 | 0.825670706 | 0.627236732 | -0.259585373 | 2.19E-06    | 1.77E-05    |
| EXON1 | CPNE8      | 12 | 39299364/39299326                                           | 2 | cg01963134/cg13603508                                             | 0.245409402 | 0.243125381 | 0.406029529 | 0.160620127  | 0.00743476  | 0.024944063 |
| EXON1 | CPXM1      | 20 | 2781262/2781122/2781241                                     | 3 | cg07113642/cg15547669/cg22304612                                  | 0.261711148 | 0.28907327  | 0.448230117 | 0.186518969  | 0.000704961 | 0.003024954 |
| EXON1 | CR1        | 1  | 207669716/207669576/207669544                               | 3 | cg02588107/cg05825950/cg18147366                                  | 0.083524104 | 0.161724098 | 0.2775816   | 0.194057496  | 2.55E-06    | 2.02E-05    |
| EXON1 | CR1L       | 1  | 207818493                                                   | 1 | cg24557058                                                        | 0.25046316  | 0.380392383 | 0.543904982 | 0.293441822  | 1.09E-07    | 1.30E-06    |
| EXON1 | CREB5      | 7  | 28338985/28452289/28475265                                  | 3 | cg02611282/cg16534307/cg20306842                                  | 0.534178985 | 0.427034094 | 0.331157832 | -0.203021153 | 2.73E-10    | 9.80E-09    |
| EXON1 | CRH        | 8  | 67090581                                                    | 1 | cg17305181                                                        | 0.42448583  | 0.523840244 | 0.664674323 | 0.240188493  | 1.15E-10    | 5.33E-09    |
| EXON1 | CRHR2      | 7  | 30721888/30721797/30722114                                  | 3 | cg04922810/cg04923928/cg24610236                                  | 0.197184223 | 0.25295113  | 0.364745407 | 0.167561184  | 7.36E-06    | 5.17E-05    |
| EXON1 | CRISPLD1   | 8  | 75896975/75897115                                           | 2 | cg01410472/cg02942845                                             | 0.29672969  | 0.373407267 | 0.516262164 | 0.219532474  | 5.66E-09    | 1.08E-07    |
| EXON1 | CRYGD      | 2  | 208989209/208989248                                         | 2 | cg17916432/cg22399133                                             | 0.566959963 | 0.630215325 | 0.747540161 | 0.180580199  | 1.86E-08    | 2.86E-07    |
| EXON1 | CSF2       | 5  | 131409637/131409634                                         | 2 | cg02196805/cg08686879                                             | 0.686377968 | 0.581226558 | 0.467545507 | -0.218832461 | 2.59E-09    | 5.50E-08    |
| EXON1 | CSGALNACT1 | 8  | 19459672/19459996/19539991                                  | 3 | cg15232539/cg17470251/cg23328404                                  | 0.373529295 | 0.285281789 | 0.213618641 | -0.159910654 | 2.35E-07    | 2.51E-06    |
| EXON1 | CSMD1      | 8  | 4852036                                                     | 1 | cg12258042                                                        | 0.56875419  | 0.654968889 | 0.762469864 | 0.193715674  | 1.56E-09    | 3.67E-08    |
| EXON1 | CSN2       | 4  | 70826695                                                    | 1 | cg21945989                                                        | 0.64838953  | 0.593371167 | 0.49804175  | -0.15034778  | 0.001902626 | 0.00740943  |
| EXON1 | CST5       | 20 | 23860242                                                    | 1 | cg01454519                                                        | 0.74384544  | 0.624202256 | 0.553199659 | -0.190645781 | 1.95E-06    | 1.60E-05    |
| EXON1 | CTNNA3     | 10 | 69455804                                                    | 1 | cg19996026                                                        | 0.509914225 | 0.4564797   | 0.297704323 | -0.212209902 | 4.91E-07    | 4.72E-06    |

|       |         |    |                                                            |   |                                                                   |             |             |             |              |             |             |
|-------|---------|----|------------------------------------------------------------|---|-------------------------------------------------------------------|-------------|-------------|-------------|--------------|-------------|-------------|
| EXON1 | CUX2    | 12 | 111471963                                                  | 1 | cg09229912                                                        | 0.293054925 | 0.402388711 | 0.519260705 | 0.22620578   | 2.99E-08    | 4.32E-07    |
| EXON1 | CXCR1   | 2  | 219031640                                                  | 1 | cg20025658                                                        | 0.438184495 | 0.294536117 | 0.207657482 | -0.230527013 | 3.43E-12    | 5.46E-10    |
| EXON1 | CYP26C1 | 10 | 94821085                                                   | 1 | cg20322977                                                        | 0.505071995 | 0.608325311 | 0.722379009 | 0.217307014  | 9.80E-11    | 4.75E-09    |
| EXON1 | CYP2B6  | 19 | 41497222                                                   | 1 | cg19756068                                                        | 0.47676136  | 0.393884778 | 0.323333391 | -0.153427969 | 9.62E-11    | 4.71E-09    |
| EXON1 | CYP2C18 | 10 | 96443383                                                   | 1 | cg14196507                                                        | 0.65630379  | 0.492147161 | 0.376205891 | -0.280097899 | 5.45E-11    | 3.35E-09    |
| EXON1 | CYP3A5  | 7  | 99277496                                                   | 1 | cg15257783                                                        | 0.496916545 | 0.41772885  | 0.330803141 | -0.166113404 | 1.72E-10    | 7.06E-09    |
| EXON1 | CYYR1   | 21 | 27945413                                                   | 1 | cg19678828                                                        | 0.535953395 | 0.613151833 | 0.695989627 | 0.160036232  | 1.28E-10    | 5.73E-09    |
| EXON1 | D4S234E | 4  | 4388505                                                    | 1 | cg13432708                                                        | 0.152787557 | 0.195513763 | 0.351984998 | 0.199197441  | 0.00167928  | 0.006613632 |
| EXON1 | DAB1    | 1  | 58716018/58716033                                          | 2 | cg00848728/cg24351410                                             | 0.21101627  | 0.301038222 | 0.424539043 | 0.213522773  | 1.02E-06    | 9.12E-06    |
| EXON1 | DAO     | 12 | 109273999                                                  | 1 | cg12592321                                                        | 0.561895295 | 0.470840789 | 0.365507909 | -0.196387386 | 4.90E-10    | 1.49E-08    |
| EXON1 | DBC1    | 9  | 122131497                                                  | 1 | cg06602847                                                        | 0.41118854  | 0.459553056 | 0.602685645 | 0.191497105  | 4.05E-05    | 0.000235707 |
| EXON1 | DBX1    | 11 | 20181725                                                   | 1 | cg13445796                                                        | 0.474141205 | 0.593457472 | 0.754344464 | 0.280203259  | 7.58E-10    | 2.12E-08    |
| EXON1 | DBX2    | 12 | 45444420/45444767/45444623                                 | 3 | cg02332982/cg07469402/cg19788831                                  | 0.371399733 | 0.478532342 | 0.592899759 | 0.221500027  | 1.07E-08    | 1.83E-07    |
| EXON1 | DCC     | 18 | 49867117/49866548/49867126                                 | 3 | cg06261937/cg21669679/cg25266232                                  | 0.332915208 | 0.41640653  | 0.524336224 | 0.191421016  | 5.94E-07    | 5.60E-06    |
| EXON1 | DCLK1   | 13 | 36705446                                                   | 1 | cg20219457                                                        | 0.321214625 | 0.385892277 | 0.57984025  | 0.258625625  | 5.24E-06    | 3.83E-05    |
| EXON1 | DCT     | 13 | 95131809                                                   | 1 | cg05807291                                                        | 0.63958114  | 0.60577005  | 0.481196077 | -0.158385063 | 3.11E-05    | 0.000186313 |
| EXON1 | DDX25   | 11 | 125774447/125774406/125774311                              | 3 | cg11413039/cg19792599/cg22097425                                  | 0.448469455 | 0.519013998 | 0.623313264 | 0.174843809  | 3.77E-10    | 1.21E-08    |
| EXON1 | DEFB125 | 20 | 68396                                                      | 1 | cg01958189                                                        | 0.495010375 | 0.382493333 | 0.299602441 | -0.195407934 | 2.40E-06    | 1.92E-05    |
| EXON1 | DEFB132 | 20 | 238452                                                     | 1 | cg00545462                                                        | 0.47173859  | 0.374398744 | 0.261537495 | -0.210201095 | 4.03E-13    | 1.48E-10    |
| EXON1 | DEFB135 | 8  | 11839844                                                   | 1 | cg22743884                                                        | 0.656798795 | 0.489811556 | 0.313000655 | -0.34379814  | 7.45E-14    | 5.19E-11    |
| EXON1 | DFNA5   | 7  | 24797363/24797486                                          | 2 | cg04770504/cg24805239                                             | 0.13050853  | 0.192500801 | 0.322753753 | 0.192245224  | 0.000123079 | 0.000637264 |
| EXON1 | DISP1   | 1  | 223101848/223101782                                        | 2 | cg10942056/cg13952483                                             | 0.58366515  | 0.478180539 | 0.432368886 | -0.151296264 | 5.76E-06    | 4.15E-05    |
| EXON1 | DKK2    | 4  | 107956556/10795265/107957362/107956955/107957430/107957072 | 6 | cg00594011/cg01471384/cg01962428/cg08341316/cg13139972/cg26955835 | 0.202380163 | 0.362494168 | 0.489249718 | 0.286869556  | 6.91E-09    | 1.27E-07    |
| EXON1 | DLEU7   | 13 | 51417686/51417469/51417846                                 | 3 | cg06679720/cg17241776/cg20170533                                  | 0.42299608  | 0.534649796 | 0.6745798   | 0.25158372   | 1.18E-11    | 1.25E-09    |
| EXON1 | DLK1    | 14 | 101193397/101193432                                        | 2 | cg02874376/cg21575295                                             | 0.365188708 | 0.426066808 | 0.524482223 | 0.159293515  | 5.18E-07    | 4.94E-06    |
| EXON1 | DMRT1   | 9  | 841850                                                     | 1 | cg03168582                                                        | 0.093905036 | 0.264365498 | 0.371218771 | 0.277313735  | 0.000187585 | 0.000932219 |
| EXON1 | DNAH11  | 7  | 21582834                                                   | 1 | cg05285902                                                        | 0.182962681 | 0.209432983 | 0.381891586 | 0.198928906  | 0.000344154 | 0.00159524  |

|       |        |    |                                                                                         |   |                                                                                              |             |             |             |              |             |             |
|-------|--------|----|-----------------------------------------------------------------------------------------|---|----------------------------------------------------------------------------------------------|-------------|-------------|-------------|--------------|-------------|-------------|
| EXON1 | DNAJA4 | 15 | 78556512/7855653<br>4/78557094/785565 4<br>02                                           | 4 | cg08594606/cg09214<br>398/cg13747794/cg2<br>3366752                                          | 0.6657829   | 0.575533097 | 0.497727018 | -0.168055882 | 2.43E-10    | 8.98E-09    |
| EXON1 | DNM3   | 1  | 171810910/171810<br>778                                                                 | 2 | cg05377226/cg06211<br>893                                                                    | 0.092526396 | 0.164498276 | 0.24640649  | 0.153880094  | 0.011113431 | 0.035537727 |
| EXON1 | DNMT3L | 21 | 45681834                                                                                | 1 | cg15635600                                                                                   | 0.53082813  | 0.4463379   | 0.377105464 | -0.153722666 | 1.90E-09    | 4.29E-08    |
| EXON1 | DOK5   | 20 | 53092474/5309233<br>4                                                                   | 2 | cg00055557/cg20107<br>395                                                                    | 0.245197855 | 0.316964298 | 0.471235526 | 0.226037671  | 6.40E-06    | 4.56E-05    |
| EXON1 | DOK6   | 18 | 67068457                                                                                | 1 | cg15916399                                                                                   | 0.281403135 | 0.369422233 | 0.461386509 | 0.179983374  | 3.06E-12    | 5.19E-10    |
| EXON1 | DPP6   | 7  | 153749964/153584<br>582/154002372/153<br>584597/154002618/ 7<br>153584748/153584<br>609 | 7 | cg02855576/cg06495<br>961/cg13544851/cg1<br>4523847/cg21389309<br>/cg24011260/cg2703<br>2232 | 0.469985229 | 0.554915753 | 0.688593164 | 0.218607935  | 3.04E-10    | 1.06E-08    |
| EXON1 | DPPA2  | 3  | 109035305                                                                               | 1 | cg15286037                                                                                   | 0.631205185 | 0.5388412   | 0.435731673 | -0.195473512 | 1.06E-08    | 1.82E-07    |
| EXON1 | DPYS   | 8  | 105479248/105479<br>058/105479215                                                       | 3 | cg05736768/cg10303<br>487/cg17087640                                                         | 0.35026123  | 0.397745774 | 0.506450508 | 0.156189278  | 1.89E-05    | 0.000120632 |
| EXON1 | DQX1   | 2  | 74753358/7475328<br>1/74753334/747533<br>4<br>12                                        | 4 | cg01410453/cg02034<br>222/cg06151718/cg2<br>4544105                                          | 0.643364703 | 0.502117763 | 0.42691287  | -0.216451834 | 1.56E-09    | 3.67E-08    |
| EXON1 | DRD4   | 11 | 637491                                                                                  | 1 | cg09607276                                                                                   | 0.33616394  | 0.423128867 | 0.532067159 | 0.195903219  | 2.30E-06    | 1.85E-05    |
| EXON1 | DSCAM  | 21 | 42218932/4221855<br>1/42218964                                                          | 3 | cg09880551/cg10644<br>072/cg21173447                                                         | 0.275889612 | 0.313908063 | 0.431539523 | 0.155649911  | 0.00019725  | 0.000976214 |
| EXON1 | DYDC2  | 10 | 82116571                                                                                | 1 | cg01527459                                                                                   | 0.2575856   | 0.335183755 | 0.495825223 | 0.238239623  | 0.000142361 | 0.000725425 |
| EXON1 | DZIP1  | 13 | 96296844/9629670<br>8                                                                   | 2 | cg00756058/cg08386<br>091                                                                    | 0.092726217 | 0.112865545 | 0.25564515  | 0.162918934  | 0.003179271 | 0.011718745 |
| EXON1 | EBF1   | 5  | 158526693/158526<br>614/158526642                                                       | 3 | cg04217450/cg05530<br>568/cg17009297                                                         | 0.283888828 | 0.337726565 | 0.504129801 | 0.220240973  | 3.94E-06    | 2.98E-05    |
| EXON1 | EBF2   | 8  | 25902284                                                                                | 1 | cg22841810                                                                                   | 0.22877555  | 0.283158901 | 0.411130284 | 0.182354734  | 0.002885229 | 0.010724554 |
| EXON1 | EDNRA  | 4  | 148402408/148402<br>128/148402399                                                       | 3 | cg04045079/cg12009<br>023/cg20557687                                                         | 0.32039387  | 0.400135897 | 0.534961491 | 0.214567621  | 1.85E-06    | 1.53E-05    |
| EXON1 | EFCAB1 | 8  | 49647734/4964780<br>9/49647703/496477<br>17/49647833                                    | 5 | cg08258526/cg11469<br>098/cg15397374/cg2<br>2836229/cg23562261                               | 0.369355676 | 0.425960703 | 0.55363708  | 0.184281404  | 6.40E-06    | 4.56E-05    |
| EXON1 | EFCAB3 | 17 | 60447682                                                                                | 1 | cg17876595                                                                                   | 0.77645862  | 0.605235417 | 0.423534982 | -0.352923638 | 1.13E-11    | 1.24E-09    |
| EXON1 | EFCAB9 | 5  | 171621251                                                                               | 1 | cg14069601                                                                                   | 0.740556155 | 0.6604426   | 0.560342682 | -0.180213473 | 4.01E-07    | 3.97E-06    |
| EXON1 | EFEMP1 | 2  | 56150341/5615092<br>5/56150255                                                          | 3 | cg03122624/cg08130<br>988/cg20786074                                                         | 0.30868343  | 0.372410063 | 0.482420894 | 0.173737464  | 7.84E-06    | 5.47E-05    |
| EXON1 | EFHA2  | 8  | 16885000                                                                                | 1 | cg12097222                                                                                   | 0.533506075 | 0.625467383 | 0.735539968 | 0.202033893  | 3.36E-13    | 1.31E-10    |

|       |        |    |                                                                                                                                                                                                                      |    |                                                                                                                                                                                                                                    |             |             |             |              |             |             |
|-------|--------|----|----------------------------------------------------------------------------------------------------------------------------------------------------------------------------------------------------------------------|----|------------------------------------------------------------------------------------------------------------------------------------------------------------------------------------------------------------------------------------|-------------|-------------|-------------|--------------|-------------|-------------|
| EXON1 | EGFL7  | 9  | 139557460                                                                                                                                                                                                            | 1  | cg17443080                                                                                                                                                                                                                         | 0.562301065 | 0.448419544 | 0.348661809 | -0.213639256 | 6.72E-13    | 2.12E-10    |
| EXON1 | EHD3   | 2  | 31457287/3145760<br>8/31457061/314569<br>66/31457058/31456<br>964/31457043                                                                                                                                           | 7  | cg01163837/cg08251<br>399/cg13795465/cg1<br>5355118/cg24743639<br>/cg25428398/cg2584<br>0208                                                                                                                                       | 0.301393544 | 0.441993062 | 0.52556991  | 0.224176366  | 1.34E-07    | 1.55E-06    |
| EXON1 | EID3   | 12 | 104697620/104697<br>983/104697631                                                                                                                                                                                    | 3  | cg00588621/cg01848<br>457/cg05057777                                                                                                                                                                                               | 0.58006345  | 0.645740822 | 0.735975395 | 0.155911945  | 5.02E-11    | 3.15E-09    |
| EXON1 | ELF3   | 1  | 201979938/201979<br>846/201979764                                                                                                                                                                                    | 3  | cg02076020/cg07897<br>871/cg26328757                                                                                                                                                                                               | 0.58622302  | 0.48765833  | 0.401774527 | -0.184448493 | 1.19E-10    | 5.44E-09    |
| EXON1 | ELOVL2 | 6  | 11044558/1104454<br>1                                                                                                                                                                                                | 2  | cg05446010/cg22143<br>569                                                                                                                                                                                                          | 0.028742374 | 0.092247237 | 0.198802878 | 0.170060504  | 7.53E-05    | 0.000410365 |
| EXON1 | ELOVL4 | 6  | 80656973/8065719<br>3                                                                                                                                                                                                | 2  | cg02169734/cg21992<br>350                                                                                                                                                                                                          | 0.0539617   | 0.107211908 | 0.257500826 | 0.203539126  | 0.000204501 | 0.001006148 |
| EXON1 | EMB    | 5  | 49737178/4973718<br>2/49736988                                                                                                                                                                                       | 3  | cg03179043/cg08722<br>065/cg18110165                                                                                                                                                                                               | 0.230660551 | 0.447511756 | 0.520510282 | 0.289849731  | 2.05E-12    | 4.05E-10    |
| EXON1 | ENPP3  | 6  | 131958550                                                                                                                                                                                                            | 1  | cg25461865                                                                                                                                                                                                                         | 0.515706525 | 0.403366617 | 0.334653768 | -0.181052757 | 5.68E-10    | 1.67E-08    |
| EXON1 | ENPP6  | 4  | 185139078                                                                                                                                                                                                            | 1  | cg08493463                                                                                                                                                                                                                         | 0.55805469  | 0.491997322 | 0.384458145 | -0.173596545 | 1.94E-11    | 1.75E-09    |
| EXON1 | EPHA10 | 1  | 38230769/3823077<br>9                                                                                                                                                                                                | 2  | cg12128017/cg20510<br>207                                                                                                                                                                                                          | 0.302970382 | 0.384643194 | 0.540645805 | 0.237675423  | 1.60E-06    | 1.35E-05    |
| EXON1 | EPHA5  | 4  | 66535575/6653538<br>3/66535403/665354<br>12/66535351                                                                                                                                                                 | 5  | cg02463418/cg09009<br>536/cg12682684/cg1<br>4810013/cg25798792                                                                                                                                                                     | 0.38301656  | 0.469309788 | 0.564483564 | 0.181467004  | 1.01E-06    | 8.98E-06    |
| EXON1 | EPHA6  | 3  | 96533699/9653352<br>0/96533511/965335<br>30/96533824                                                                                                                                                                 | 5  | cg05827732/cg09301<br>294/cg11410023/cg1<br>5405439/cg26364205                                                                                                                                                                     | 0.30481357  | 0.351154689 | 0.518230145 | 0.213416575  | 2.50E-05    | 0.000153618 |
| EXON1 | EPS8L3 | 1  | 110306507                                                                                                                                                                                                            | 1  | cg00515905                                                                                                                                                                                                                         | 0.58956258  | 0.476793306 | 0.375044255 | -0.214518325 | 4.24E-11    | 2.84E-09    |
| EXON1 | ERBB4  | 2  | 213403212/213403<br>321                                                                                                                                                                                              | 2  | cg07015629/cg19079<br>194                                                                                                                                                                                                          | 0.22029798  | 0.223880067 | 0.386143727 | 0.165845747  | 5.79E-05    | 0.000324929 |
| EXON1 | ESR1   | 6  | 152129388/152011<br>656/152128535/152<br>129036/152128515/<br>152128634/152128<br>865/152126938/152<br>011666/152128471/ 17<br>152129400/152126<br>895/152128483/152<br>128584/152128588/<br>152128537/152128<br>528 | 17 | cg00920970/cg04211<br>581/cg05171584/cg1<br>1251858/cg11813455<br>/cg13612689/cg1598<br>0539/cg17264271/cg<br>18007957/cg1941114<br>6/cg20253551/cg211<br>57690/cg21950534/c<br>g22839866/cg230092<br>21/cg23467008/cg24<br>900983 | 0.310897523 | 0.382499544 | 0.479582414 | 0.16868489   | 2.04E-07    | 2.22E-06    |

|       |         |    |                                                                                           |   |                                                                                                    |             |             |             |              |             |             |
|-------|---------|----|-------------------------------------------------------------------------------------------|---|----------------------------------------------------------------------------------------------------|-------------|-------------|-------------|--------------|-------------|-------------|
| EXON1 | EVC     | 4  | 5713100/5712937/5713005                                                                   | 3 | cg16418810/cg17460447/cg21210758                                                                   | 0.246805393 | 0.344737494 | 0.514194583 | 0.26738919   | 1.46E-09    | 3.49E-08    |
| EXON1 | EVC2    | 4  | 5710767/5710761/5710016/5710098                                                           | 4 | cg03278643/cg17242664/cg22290744/cg23665381                                                        | 0.300297383 | 0.386255564 | 0.527761918 | 0.227464536  | 1.95E-06    | 1.60E-05    |
| EXON1 | EYA4    | 6  | 133562494/133562776/133562774                                                             | 3 | cg14270292/cg24176563/cg26656135                                                                   | 0.247029795 | 0.351895392 | 0.483049186 | 0.236019391  | 4.25E-06    | 3.18E-05    |
| EXON1 | FADS2   | 11 | 61595956/61596068/61595807                                                                | 3 | cg07005513/cg16576620/cg25303599                                                                   | 0.104630764 | 0.177917187 | 0.324015462 | 0.219384698  | 5.63E-05    | 0.00031733  |
| EXON1 | FADS6   | 17 | 72889549                                                                                  | 1 | cg00266322                                                                                         | 0.164498418 | 0.244591401 | 0.396734987 | 0.23223657   | 4.85E-05    | 0.000277888 |
| EXON1 | FAIM2   | 12 | 50297588/50297581                                                                         | 2 | cg16115588/cg27188703                                                                              | 0.355989765 | 0.464132031 | 0.593607943 | 0.237618178  | 2.37E-07    | 2.52E-06    |
| EXON1 | FAM110B | 8  | 58907242                                                                                  | 1 | cg17151990                                                                                         | 0.248215041 | 0.292197493 | 0.424324382 | 0.176109341  | 0.000763723 | 0.003252829 |
| EXON1 | FAM123A | 13 | 25745406/25743608/25743999/2574568/25744676/25745784                                      | 6 | cg07920503/cg11030811/cg13055385/cg14880499/cg18815647/cg22029275                                  | 0.519146995 | 0.603244805 | 0.707382414 | 0.188235419  | 1.57E-09    | 3.69E-08    |
| EXON1 | FAM132A | 1  | 1181956                                                                                   | 1 | cg04719903                                                                                         | 0.244664875 | 0.288058028 | 0.459094609 | 0.214429734  | 2.78E-05    | 0.000168355 |
| EXON1 | FAM155A | 13 | 108518237/108519213/108518955/108518179/108518152/108518445/108518621/108518419/108519318 | 9 | cg03333286/cg04607400/cg05383490/cg07223990/cg13398192/cg14119999/cg15669183/cg17673237/cg19839798 | 0.354260508 | 0.408212486 | 0.565954616 | 0.211694108  | 8.64E-08    | 1.06E-06    |
| EXON1 | FAM159A | 1  | 53099248                                                                                  | 1 | cg18146843                                                                                         | 0.36751812  | 0.476092667 | 0.610046791 | 0.242528671  | 1.08E-08    | 1.84E-07    |
| EXON1 | FAM159B | 5  | 63986392                                                                                  | 1 | cg10981909                                                                                         | 0.354039175 | 0.485957006 | 0.671355627 | 0.317316452  | 8.47E-10    | 2.32E-08    |
| EXON1 | FAM162B | 6  | 117086850/117086601                                                                       | 2 | cg07641160/cg23367608                                                                              | 0.232302324 | 0.278231633 | 0.45443854  | 0.222136216  | 1.08E-06    | 9.58E-06    |
| EXON1 | FAM183A | 1  | 43613627/43613606                                                                         | 2 | cg12059147/cg20991612                                                                              | 0.26131836  | 0.304062056 | 0.435364445 | 0.174046085  | 1.45E-06    | 1.23E-05    |
| EXON1 | FAM19A2 | 12 | 62585204/62585579/62585877/62586425/62585467/62586267/62586003                            | 7 | cg00089798/cg03001945/cg12243597/cg15736338/cg20010506/cg20041366/cg26953435                       | 0.348404564 | 0.437283461 | 0.569949066 | 0.221544502  | 1.21E-10    | 5.44E-09    |
| EXON1 | FAM19A4 | 3  | 68981503                                                                                  | 1 | cg23967169                                                                                         | 0.309262405 | 0.36991745  | 0.578523827 | 0.269261422  | 3.01E-08    | 4.34E-07    |
| EXON1 | FAM19A5 | 22 | 48972349/48885506/48885446/48972331                                                       | 4 | cg06273376/cg19030607/cg22643811/cg22989103                                                        | 0.277995578 | 0.356453258 | 0.479829676 | 0.201834097  | 7.58E-09    | 1.37E-07    |
| EXON1 | FAM26E  | 6  | 116832940                                                                                 | 1 | cg23741330                                                                                         | 0.508259095 | 0.4046786   | 0.306573218 | -0.201685877 | 9.92E-13    | 2.68E-10    |

|       |        |    |                                                                                           |    |                                                                                                               |             |             |             |              |             |             |
|-------|--------|----|-------------------------------------------------------------------------------------------|----|---------------------------------------------------------------------------------------------------------------|-------------|-------------|-------------|--------------|-------------|-------------|
| EXON1 | FAM3D  | 3  | 58652346/58652503                                                                         | 2  | cg02194211/cg24121168                                                                                         | 0.547127148 | 0.456620672 | 0.382733141 | -0.164394007 | 1.20E-10    | 5.44E-09    |
| EXON1 | FAM43B | 1  | 20880663/20879813/20879029/20880461/20879286/20879644/20879547/20880378/20879296/20880591 | 10 | cg00527174/cg02582387/cg03754311/cg04850423/cg05771261/cg06393286/cg12768681/cg17543296/cg20404387/cg23993425 | 0.266384089 | 0.336156505 | 0.456769948 | 0.190385859  | 7.44E-09    | 1.35E-07    |
| EXON1 | FAM72B | 1  | 120839380/120839385/120839390                                                             | 3  | cg00198436/cg07236150/cg09169215                                                                              | 0.066481005 | 0.145489607 | 0.294410058 | 0.227929053  | 5.58E-07    | 5.29E-06    |
| EXON1 | FBN1   | 15 | 48937856/48937958                                                                         | 2  | cg03535663/cg19908534                                                                                         | 0.11212821  | 0.219897732 | 0.34313974  | 0.231011531  | 4.17E-05    | 0.00024232  |
| EXON1 | FBN2   | 5  | 127873283/12787397/127873106/127873552/127873711                                          | 5  | cg05209584/cg12940822/cg17564775/cg17958315/cg25084878                                                        | 0.26655335  | 0.371927499 | 0.558581465 | 0.292028115  | 1.74E-07    | 1.93E-06    |
| EXON1 | FBXL21 | 5  | 135266135                                                                                 | 1  | cg01283246                                                                                                    | 0.340430175 | 0.415659217 | 0.519995168 | 0.179564993  | 9.29E-05    | 0.000494763 |
| EXON1 | FBXL7  | 5  | 15500714                                                                                  | 1  | cg06577205                                                                                                    | 0.344421575 | 0.375808717 | 0.528633736 | 0.184212161  | 0.000116015 | 0.000603524 |
| EXON1 | FBXO39 | 17 | 6679564                                                                                   | 1  | cg02374745                                                                                                    | 0.51562654  | 0.604659667 | 0.748948491 | 0.233321951  | 2.26E-10    | 8.48E-09    |
| EXON1 | FERD3L | 7  | 19184427/19184950/19184555/19184961                                                       | 4  | cg02503874/cg10477621/cg23536473/cg25691167                                                                   | 0.403259229 | 0.521929385 | 0.647663228 | 0.244404     | 1.13E-11    | 1.24E-09    |
| EXON1 | FEZF2  | 3  | 62358980                                                                                  | 1  | cg19629292                                                                                                    | 0.211013726 | 0.295144095 | 0.404459859 | 0.193446134  | 0.000369415 | 0.001701599 |
| EXON1 | FGB    | 4  | 155484272                                                                                 | 1  | cg21082050                                                                                                    | 0.60566691  | 0.555381978 | 0.422779214 | -0.182887696 | 4.55E-07    | 4.42E-06    |
| EXON1 | FGF10  | 5  | 44388688/44388596                                                                         | 2  | cg14654926/cg22574802                                                                                         | 0.24725103  | 0.306616033 | 0.40693698  | 0.15968595   | 1.16E-05    | 7.75E-05    |
| EXON1 | FGF12  | 3  | 192126244/192445380/192126165/192126584/192126825/192126023/192445307/192126742           | 8  | cg00386551/cg02992632/cg04003850/cg04350913/cg16209795/cg18780257/cg19507527/cg21197774                       | 0.1959348   | 0.283200399 | 0.43707825  | 0.241143451  | 3.80E-08    | 5.26E-07    |
| EXON1 | FGF4   | 11 | 69590090/69590113                                                                         | 2  | cg19831575/cg23964057                                                                                         | 0.151178155 | 0.239285329 | 0.42840766  | 0.277229506  | 7.18E-07    | 6.63E-06    |
| EXON1 | FGF5   | 4  | 81187798/81187906                                                                         | 2  | cg02002231/cg14197923                                                                                         | 0.106380913 | 0.196157855 | 0.391203448 | 0.284822535  | 2.36E-05    | 0.000145811 |
| EXON1 | FHL5   | 6  | 97010439                                                                                  | 1  | cg23978322                                                                                                    | 0.786763655 | 0.627829161 | 0.527864168 | -0.258899487 | 2.96E-08    | 4.29E-07    |
| EXON1 | FIGLA  | 2  | 71017557/71017637/71017541                                                                | 3  | cg00469856/cg16907558/cg22650617                                                                              | 0.34936377  | 0.449135156 | 0.614173406 | 0.264809636  | 4.35E-10    | 1.36E-08    |
| EXON1 | FLI1   | 11 | 128564106/128563903/128562408                                                             | 3  | cg06072021/cg06172475/cg17476271                                                                              | 0.115084187 | 0.270050914 | 0.480289485 | 0.365205298  | 9.37E-06    | 6.41E-05    |

|       |          |    |                                                                                                 |   |                                                                                                         |             |             |             |              |             |             |
|-------|----------|----|-------------------------------------------------------------------------------------------------|---|---------------------------------------------------------------------------------------------------------|-------------|-------------|-------------|--------------|-------------|-------------|
| EXON1 | FLJ20184 | 4  | 106473806                                                                                       | 1 | cg27126442                                                                                              | 0.54336524  | 0.439075839 | 0.345794486 | -0.197570754 | 2.09E-09    | 4.62E-08    |
| EXON1 | FLJ23834 | 7  | 105603743                                                                                       | 1 | cg02661623                                                                                              | 0.676365055 | 0.588094428 | 0.513351982 | -0.163013073 | 3.30E-05    | 0.000196301 |
| EXON1 | FLRT2    | 14 | 85996499/8599675<br>1/85996495/859968<br>73                                                     | 4 | cg01711160/cg05855<br>039/cg17410236/cg2<br>5120290                                                     | 0.387769243 | 0.505374665 | 0.658286638 | 0.270517395  | 1.76E-10    | 7.11E-09    |
| EXON1 | FMN2     | 1  | 240255377/240256<br>014/240256644/240<br>256603/240255691/<br>240255627/240256<br>019/240255486 | 8 | cg02574509/cg05658<br>491/cg06400704/cg1<br>5031661/cg17012160<br>/cg22931725/cg2464<br>3282/cg25208017 | 0.195649768 | 0.235530623 | 0.356289674 | 0.160639906  | 0.00079231  | 0.003363494 |
| EXON1 | FNDC1    | 6  | 159590578                                                                                       | 1 | cg14971597                                                                                              | 0.174748926 | 0.286958762 | 0.397212366 | 0.222463441  | 1.04E-06    | 9.25E-06    |
| EXON1 | FOLH1    | 11 | 49230168/4923003<br>6                                                                           | 2 | cg14775560/cg25346<br>915                                                                               | 0.291977923 | 0.319281246 | 0.501149359 | 0.209171437  | 1.49E-05    | 9.78E-05    |
| EXON1 | FOLH1B   | 11 | 89392829                                                                                        | 1 | cg02915544                                                                                              | 0.59441058  | 0.412695106 | 0.265445155 | -0.328965425 | 2.35E-14    | 3.78E-11    |
| EXON1 | FOXC2    | 16 | 86602533/8660233<br>9/86601024/866015<br>20/86601361/86601<br>133/86602083/8660<br>2471         | 8 | cg03190266/cg03613<br>339/cg04081201/cg0<br>4510512/cg07844659<br>/cg08384637/cg0919<br>5198/cg26948907 | 0.264726497 | 0.320529613 | 0.448292781 | 0.183566284  | 8.88E-07    | 8.01E-06    |
| EXON1 | FOXE1    | 9  | 100618041/100617<br>710/100616607/100<br>617370/100615796/<br>100617999/100616<br>469           | 7 | cg04007303/cg13696<br>609/cg13791254/cg1<br>7702692/cg19292008<br>/cg21174841/cg2439<br>3316            | 0.33428108  | 0.428452115 | 0.533851838 | 0.199570757  | 8.32E-09    | 1.48E-07    |
| EXON1 | FOXF1    | 16 | 86544346/8654430<br>8/86544787/865443<br>39/86544658                                            | 5 | cg00314966/cg08157<br>228/cg10514097/cg2<br>5971347/cg27122536                                          | 0.21386133  | 0.244452614 | 0.425902228 | 0.212040898  | 1.20E-07    | 1.40E-06    |
| EXON1 | FOXF2    | 6  | 1390998/1390361/1<br>390622/1391265/13<br>90838/1391207                                         | 6 | cg02386403/cg02547<br>269/cg12221475/cg1<br>7305266/cg24151352<br>/cg26987597                           | 0.250818699 | 0.285224878 | 0.423519598 | 0.172700899  | 0.000222651 | 0.00108488  |
| EXON1 | FOXG1    | 14 | 29236535/2923689<br>8/29236323/292364<br>76/29238731/29237<br>202/29237480                      | 7 | cg05872306/cg07489<br>048/cg10300684/cg1<br>0828337/cg12150366<br>/cg16582779/cg1680<br>4284            | 0.45243924  | 0.523635318 | 0.654720264 | 0.202281024  | 8.33E-11    | 4.31E-09    |
| EXON1 | FOXI2    | 10 | 129535786/129535<br>669/129535898/129<br>535968/129535893                                       | 5 | cg02595832/cg07918<br>545/cg13929328/cg1<br>9884262/cg26115633                                          | 0.477692066 | 0.541990444 | 0.67681477  | 0.199122704  | 1.12E-07    | 1.34E-06    |



|       |        |    |                                                                                                       |    |                                                                                                                          |             |             |             |              |             |             |
|-------|--------|----|-------------------------------------------------------------------------------------------------------|----|--------------------------------------------------------------------------------------------------------------------------|-------------|-------------|-------------|--------------|-------------|-------------|
| EXON1 | FOXN4  | 12 | 109747000                                                                                             | 1  | cg22326903                                                                                                               | 0.068558682 | 0.145944608 | 0.267626035 | 0.199067353  | 0.000908907 | 0.003803836 |
| EXON1 | FPR2   | 19 | 52266642                                                                                              | 1  | cg14203721                                                                                                               | 0.69256589  | 0.55737735  | 0.455171773 | -0.237394117 | 3.72E-06    | 2.84E-05    |
| EXON1 | FREM3  | 4  | 144621089/144621385/144620341/144618119                                                               | 4  | cg00816770/cg04514249/cg04993441/cg19172665                                                                              | 0.536107185 | 0.621068931 | 0.699362274 | 0.163255089  | 4.27E-09    | 8.48E-08    |
| EXON1 | FRK    | 6  | 116381609/116381904                                                                                   | 2  | cg16176600/cg26893134                                                                                                    | 0.429479963 | 0.340561322 | 0.272251695 | -0.157228267 | 8.52E-12    | 9.97E-10    |
| EXON1 | FSCN3  | 7  | 127233742                                                                                             | 1  | cg16725721                                                                                                               | 0.80322332  | 0.700517317 | 0.613380168 | -0.189843152 | 4.00E-07    | 3.97E-06    |
| EXON1 | FSTL1  | 3  | 120169783/120169821                                                                                   | 2  | cg03424342/cg15109851                                                                                                    | 0.275980793 | 0.326929212 | 0.451583101 | 0.175602309  | 0.000543829 | 0.002403715 |
| EXON1 | FUT3   | 19 | 5851465                                                                                               | 1  | cg26899156                                                                                                               | 0.40437472  | 0.318910683 | 0.251205532 | -0.153169188 | 9.96E-10    | 2.58E-08    |
| EXON1 | FUT9   | 6  | 96463902/96463959                                                                                     | 2  | cg01758512/cg25114913                                                                                                    | 0.474523435 | 0.551099139 | 0.648341002 | 0.173817567  | 3.02E-10    | 1.06E-08    |
| EXON1 | FZD10  | 12 | 130647890/130648987/130649720/130647213/130647874/130648519/130647580/130647289                       | 8  | cg01568919/cg07742404/cg13859208/cg15928093/cg16498194/cg22347212/cg23054883/cg27232145                                  | 0.409506219 | 0.47294812  | 0.583741882 | 0.174235663  | 1.10E-09    | 2.80E-08    |
| EXON1 | G6PC   | 17 | 41053112                                                                                              | 1  | cg10596768                                                                                                               | 0.47740397  | 0.409225667 | 0.261498982 | -0.215904988 | 4.51E-08    | 6.03E-07    |
| EXON1 | GABBR1 | 6  | 29595349/29595335/29595653/29595299/29595315/29595506/29595661/29600642/29595491/29595347             | 10 | cg00594408/cg02014853/cg06078334/cg08093277/cg08862148/cg15385139/cg18344922/cg19456996/cg20997792/cg25729445            | 0.295175135 | 0.368277819 | 0.446131639 | 0.150956504  | 7.23E-07    | 6.66E-06    |
| EXON1 | GABRA5 | 15 | 27111911/27111949/27112197/271111940/271112430/271112119/27111993/27111884/27112287/27112305/27112049 | 11 | cg01378667/cg03325535/cg05044185/cg10318222/cg10652393/cg15665646/cg18255240/cg20005743/cg21276413/cg21402921/cg22523852 | 0.318817158 | 0.398405872 | 0.515148873 | 0.196331715  | 6.96E-11    | 3.89E-09    |
| EXON1 | GABRA6 | 5  | 161112787                                                                                             | 1  | cg22672790                                                                                                               | 0.391572255 | 0.294535011 | 0.191274473 | -0.200297782 | 4.56E-11    | 2.99E-09    |
| EXON1 | GABRB3 | 15 | 27018874/27018037                                                                                     | 2  | cg01690182/cg18026588                                                                                                    | 0.345069133 | 0.4230742   | 0.546525002 | 0.20145587   | 4.64E-09    | 9.07E-08    |
| EXON1 | GABRR3 | 3  | 97753734                                                                                              | 1  | cg02058357                                                                                                               | 0.70333369  | 0.615681872 | 0.507811586 | -0.195522104 | 7.47E-06    | 5.24E-05    |
| EXON1 | GAD2   | 10 | 26505442/26505503/26505440/26505245                                                                   | 4  | cg04599297/cg09056181/cg11328303/cg15850954                                                                              | 0.277074423 | 0.44180043  | 0.613517622 | 0.336443198  | 2.92E-10    | 1.03E-08    |

|       |         |    |                                                                                                               |   |                                                                                                                        |             |             |             |              |             |             |
|-------|---------|----|---------------------------------------------------------------------------------------------------------------|---|------------------------------------------------------------------------------------------------------------------------|-------------|-------------|-------------|--------------|-------------|-------------|
| EXON1 | GAL3ST3 | 11 | 65816521/6581664<br>6/65816642                                                                                | 3 | cg14780632/cg15916<br>004/cg21238818                                                                                   | 0.443559352 | 0.545256459 | 0.6444654   | 0.201094648  | 9.52E-11    | 4.69E-09    |
| EXON1 | GALNT13 | 2  | 154728735/154728<br>468                                                                                       | 2 | cg10033761/cg12079<br>322                                                                                              | 0.429723645 | 0.429760575 | 0.596179464 | 0.166455819  | 3.83E-08    | 5.30E-07    |
| EXON1 | GALNT14 | 2  | 31361104/3136137<br>1                                                                                         | 2 | cg05714219/cg24597<br>158                                                                                              | 0.05724639  | 0.146009878 | 0.298807256 | 0.241560866  | 8.02E-05    | 0.000434104 |
| EXON1 | GALNT9  | 12 | 132690570/132905<br>819/132905735/132<br>905611/132690536                                                     | 5 | cg01658960/cg02228<br>111/cg04606861/cg0<br>5143633/cg15128141                                                         | 0.38866032  | 0.454216559 | 0.576499965 | 0.187839645  | 7.64E-08    | 9.52E-07    |
| EXON1 | GALNTL6 | 4  | 172734776/172734<br>843/172734718                                                                             | 3 | cg03413465/cg15533<br>075/cg26588943                                                                                   | 0.276865617 | 0.363287785 | 0.517858048 | 0.240992432  | 8.58E-10    | 2.34E-08    |
| EXON1 | GALR1   | 18 | 74962216/7496213<br>3/74962369/749626<br>72/74962794                                                          | 5 | cg01178451/cg03502<br>002/cg04534765/cg0<br>6360427/cg10390058                                                         | 0.4910424   | 0.546092374 | 0.680061158 | 0.189018758  | 5.01E-08    | 6.60E-07    |
| EXON1 | GATA4   | 8  | 11561724/1156172<br>8                                                                                         | 2 | cg14666113/cg18283<br>386                                                                                              | 0.206845058 | 0.371160593 | 0.619421941 | 0.412576883  | 1.47E-11    | 1.45E-09    |
| EXON1 | GATA5   | 20 | 61051021                                                                                                      | 1 | cg12664464                                                                                                             | 0.24066349  | 0.317183878 | 0.472858841 | 0.232195351  | 8.96E-05    | 0.000479981 |
| EXON1 | GCM1    | 6  | 53013589                                                                                                      | 1 | cg26023389                                                                                                             | 0.55671574  | 0.423751589 | 0.338603055 | -0.218112685 | 4.02E-12    | 6.05E-10    |
| EXON1 | GCM2    | 6  | 10882043/1088194<br>9/10882050                                                                                | 3 | cg02844545/cg22851<br>295/cg25861699                                                                                   | 0.29229044  | 0.380182044 | 0.518191273 | 0.225900833  | 1.99E-07    | 2.17E-06    |
| EXON1 | GCNT3   | 15 | 59904009                                                                                                      | 1 | cg02073465                                                                                                             | 0.46463514  | 0.361757133 | 0.278809759 | -0.185825381 | 3.66E-10    | 1.19E-08    |
| EXON1 | GDF6    | 8  | 97172961/9717282<br>5                                                                                         | 2 | cg00421139/cg05701<br>791                                                                                              | 0.27426345  | 0.383657553 | 0.526804948 | 0.252541498  | 1.35E-08    | 2.21E-07    |
| EXON1 | GFRA1   | 10 | 118032892/118032<br>872/118033115/118<br>032879/118032948/<br>118031632/118032<br>987/118031654/118<br>032905 | 9 | cg08194313/cg13346<br>013/cg13890706/cg1<br>8672939/cg23898073<br>/cg24792682/cg2502<br>2687/cg27034576/cg<br>27341926 | 0.191021015 | 0.299478243 | 0.461559397 | 0.270538381  | 2.51E-05    | 0.00015391  |
| EXON1 | GFRA2   | 8  | 21645807/2164617<br>4/21645923/216458<br>70                                                                   | 4 | cg00902636/cg06067<br>208/cg09459291/cg1<br>4633783                                                                    | 0.166316193 | 0.209752566 | 0.325174522 | 0.158858329  | 0.002345091 | 0.0088896   |
| EXON1 | GHSR    | 3  | 172165696/172166<br>182/172165884/172<br>165517                                                               | 4 | cg03587978/cg07852<br>825/cg10109500/cg1<br>8875012                                                                    | 0.359880243 | 0.427030631 | 0.542640266 | 0.182760023  | 8.32E-11    | 4.31E-09    |
| EXON1 | GIF     | 11 | 59612937                                                                                                      | 1 | cg01282204                                                                                                             | 0.759301325 | 0.533209667 | 0.396963041 | -0.362338284 | 3.62E-14    | 3.78E-11    |
| EXON1 | GIPC3   | 19 | 3585609                                                                                                       | 1 | cg26797585                                                                                                             | 0.090448185 | 0.131938538 | 0.24506883  | 0.154620645  | 0.000893599 | 0.003745883 |
| EXON1 | GJC2    | 1  | 228337626                                                                                                     | 1 | cg08228672                                                                                                             | 0.699027695 | 0.637135711 | 0.506537068 | -0.192490627 | 5.95E-07    | 5.60E-06    |
| EXON1 | GJD2    | 15 | 35046650                                                                                                      | 1 | cg14576896                                                                                                             | 0.336838605 | 0.433453756 | 0.548715186 | 0.211876581  | 3.73E-08    | 5.17E-07    |

|       |          |    |                                                                         |   |                                                                                         |             |             |             |              |             |             |
|-------|----------|----|-------------------------------------------------------------------------|---|-----------------------------------------------------------------------------------------|-------------|-------------|-------------|--------------|-------------|-------------|
| EXON1 | GLB1L3   | 11 | 134146324                                                               | 1 | cg18375494                                                                              | 0.065705825 | 0.098374453 | 0.246427984 | 0.180722159  | 0.003831347 | 0.013833147 |
| EXON1 | GLDC     | 9  | 6645468/6645686                                                         | 2 | cg11747771/cg17009433                                                                   | 0.118373012 | 0.231472501 | 0.38422785  | 0.265854839  | 2.71E-05    | 0.000164629 |
| EXON1 | GLIPR1L1 | 12 | 75728469/75728471                                                       | 2 | cg21087137/cg24234651                                                                   | 0.374702302 | 0.486920539 | 0.57722738  | 0.202525077  | 2.41E-08    | 3.61E-07    |
| EXON1 | GLRA3    | 4  | 175750373/175750109/175750280                                           | 3 | cg05424071/cg21094669/cg27517702                                                        | 0.22069827  | 0.294578594 | 0.467080559 | 0.24638229   | 8.08E-08    | 1.00E-06    |
| EXON1 | GLRB     | 4  | 157997363/157997554/157997367/157997360                                 | 4 | cg09688546/cg11163620/cg16269431/cg22065614                                             | 0.223893995 | 0.308681188 | 0.499797991 | 0.275903996  | 3.38E-07    | 3.43E-06    |
| EXON1 | GNAL     | 18 | 11752538/11689284/11752215/11689613/11751566/11689206/11689218/11752089 | 8 | cg06522054/cg09331011/cg10068300/cg12585806/cg14612428/cg15616946/cg15653282/cg25958283 | 0.233843885 | 0.31017893  | 0.396972271 | 0.163128386  | 1.08E-10    | 5.09E-09    |
| EXON1 | GPC6     | 13 | 93879769/93879544/93879361/93879670/93879303                            | 5 | cg07576142/cg12989574/cg16792800/cg18058689/cg19824907                                  | 0.360206601 | 0.431576618 | 0.653171036 | 0.292964435  | 2.57E-08    | 3.81E-07    |
| EXON1 | GPNMB    | 7  | 23286463/23286319/23286539                                              | 3 | cg08455073/cg14444376/cg17274742                                                        | 0.680779238 | 0.591910219 | 0.485355214 | -0.195424024 | 8.49E-11    | 4.37E-09    |
| EXON1 | GPR115   | 6  | 47666329                                                                | 1 | cg14105536                                                                              | 0.624055265 | 0.479605228 | 0.351843545 | -0.27221172  | 4.64E-13    | 1.66E-10    |
| EXON1 | GPR128   | 3  | 100328745/100328713                                                     | 2 | cg04071964/cg23855093                                                                   | 0.52189019  | 0.364772678 | 0.299061832 | -0.222828358 | 3.32E-15    | 2.19E-11    |
| EXON1 | GPR133   | 12 | 131438788/131438737/131438527/131438626/131438523/131438540             | 6 | cg02717046/cg19642421/cg20712263/cg21502466/cg22882539/cg23379751                       | 0.256900721 | 0.378264591 | 0.463866477 | 0.206965756  | 1.67E-06    | 1.39E-05    |
| EXON1 | GPR139   | 16 | 20084944/20085047/20084851                                              | 3 | cg00938050/cg01126567/cg01944044                                                        | 0.292818248 | 0.375403906 | 0.500397327 | 0.20757908   | 9.72E-08    | 1.17E-06    |
| EXON1 | GPR149   | 3  | 154146816/154146871/154146536/154146704                                 | 4 | cg02589901/cg04919274/cg08447525/cg26856316                                             | 0.324658003 | 0.404312196 | 0.523140693 | 0.198482691  | 2.57E-10    | 9.32E-09    |
| EXON1 | GPR183   | 13 | 99959606                                                                | 1 | cg16131748                                                                              | 0.503339165 | 0.602018767 | 0.683022432 | 0.179683267  | 4.96E-11    | 3.15E-09    |
| EXON1 | GPR31    | 6  | 167571172                                                               | 1 | cg22182975                                                                              | 0.823243145 | 0.702426    | 0.629086391 | -0.194156754 | 2.45E-08    | 3.66E-07    |
| EXON1 | GPR75    | 2  | 54087008/54087028/54087066                                              | 3 | cg01876338/cg14832904/cg19961545                                                        | 0.543281248 | 0.671198724 | 0.80921843  | 0.265937182  | 6.06E-14    | 4.72E-11    |
| EXON1 | GPR83    | 11 | 94134446/94134580/94134235                                              | 3 | cg03345037/cg07586272/cg22325703                                                        | 0.24938343  | 0.344388867 | 0.465161561 | 0.215778131  | 7.01E-08    | 8.80E-07    |

|       |        |    |                                                                |   |                                                                              |             |             |              |              |             |             |
|-------|--------|----|----------------------------------------------------------------|---|------------------------------------------------------------------------------|-------------|-------------|--------------|--------------|-------------|-------------|
| EXON1 | GPR85  | 7  | 112726089/112726538/112726541/112726396/112727506              | 5 | cg00851377/cg13251269/cg20513548/cg24310431/cg25263801                       | 0.284175822 | 0.365147168 | 0.439890258  | 0.155714437  | 0.000160892 | 0.000811455 |
| EXON1 | GPT2   | 16 | 46919112/46919194                                              | 2 | cg03533472/cg23684449                                                        | 0.68016188  | 0.507733967 | 0.4307959    | -0.24936598  | 2.41E-07    | 2.56E-06    |
| EXON1 | GPX2   | 14 | 65409452/65409354                                              | 2 | cg09643186/cg19502457                                                        | 0.551342598 | 0.449911528 | 0.374119852  | -0.177222745 | 1.05E-10    | 4.95E-09    |
| EXON1 | GPX7   | 1  | 53068197/53068181                                              | 2 | cg16557944/cg20950465                                                        | 0.104817322 | 0.149943626 | 0.313647448  | 0.208830126  | 0.000146528 | 0.000744399 |
| EXON1 | GRASP  | 12 | 52400907                                                       | 1 | cg04034767                                                                   | 0.093413792 | 0.201368981 | 0.460650285  | 0.367236493  | 1.13E-06    | 9.93E-06    |
| EXON1 | GRIA1  | 5  | 152870490/152870258                                            | 2 | cg08578734/cg17020834                                                        | 0.255845245 | 0.277135519 | 0.417668555  | 0.16182331   | 0.00013114  | 0.000675303 |
| EXON1 | GRIA2  | 4  | 158141936                                                      | 1 | cg25148589                                                                   | 0.41564434  | 0.496915111 | 0.609750136  | 0.194105796  | 2.22E-07    | 2.38E-06    |
| EXON1 | GRIA4  | 11 | 105480979/105481802/105481509                                  | 3 | cg03243226/cg09980522/cg19343464                                             | 0.278805595 | 0.397171828 | 0.567878198  | 0.289072603  | 6.78E-09    | 1.25E-07    |
| EXON1 | GRID1  | 10 | 88126089/88126104                                              | 2 | cg03356747/cg03370738                                                        | 0.110334487 | 0.1974978   | 0.303397618  | 0.193063131  | 0.000132632 | 0.000681658 |
| EXON1 | GRIK1  | 21 | 31311797/31312091/31311842                                     | 3 | cg09199698/cg09542111/cg23475371                                             | 0.305930122 | 0.396502452 | 0.500280458  | 0.194350336  | 5.42E-08    | 7.04E-07    |
| EXON1 | GRIK2  | 6  | 101846916/101846905/101847058/101846872/101846967              | 5 | cg10591607/cg18193094/cg21635870/cg24301620/cg26316946                       | 0.430119524 | 0.531147041 | 0.650800781  | 0.220681257  | 1.78E-10    | 7.14E-09    |
| EXON1 | GRIK3  | 1  | 37499649                                                       | 1 | cg20168230                                                                   | 0.414037925 | 0.498189444 | 0.588076255  | 0.17403833   | 3.89E-09    | 7.79E-08    |
| EXON1 | GRIN2A | 16 | 10276092/10275934/10275767/10276580/10276081/10276119/10276600 | 7 | cg02585344/cg05406943/cg06193383/cg09239744/cg09461286/cg16904585/cg24764979 | 0.142133897 | 0.16958455  | 0.3144497083 | 0.172363186  | 3.31E-05    | 0.000196844 |
| EXON1 | GRM1   | 6  | 146348913/146348901/146348890                                  | 3 | cg03478199/cg19512268/cg21725954                                             | 0.342325205 | 0.398700128 | 0.542430305  | 0.2001051    | 7.56E-07    | 6.94E-06    |
| EXON1 | GRM7   | 3  | 6903153/6902824/6902845/6903327/6903019                        | 5 | cg02332525/cg17892178/cg18863595/cg21187352/cg27199820                       | 0.444673461 | 0.536179492 | 0.688703268  | 0.244029807  | 1.07E-12    | 2.80E-10    |
| EXON1 | GRP    | 18 | 56887410/56887404                                              | 2 | cg17093795/cg27338487                                                        | 0.37645826  | 0.466691264 | 0.559288411  | 0.182830151  | 4.00E-07    | 3.97E-06    |
| EXON1 | GRXCR1 | 4  | 42895607                                                       | 1 | cg14184077                                                                   | 0.715493885 | 0.63083845  | 0.511156164  | -0.204337721 | 1.23E-05    | 8.21E-05    |
| EXON1 | GSC    | 14 | 95236123                                                       | 1 | cg10042799                                                                   | 0.11632951  | 0.085090548 | 0.282819955  | 0.166490446  | 0.0060141   | 0.020648982 |
| EXON1 | GSDMB  | 17 | 38073560                                                       | 1 | cg21300187                                                                   | 0.86010892  | 0.746410522 | 0.623917     | -0.23619192  | 2.27E-06    | 1.83E-05    |
| EXON1 | GSDMC  | 8  | 130799007/130799093                                            | 2 | cg05316065/cg26073844                                                        | 0.558587478 | 0.434942542 | 0.3371831    | -0.221404378 | 1.51E-10    | 6.51E-09    |

|       |          |    |                                                             |   |                                                                   |             |             |             |              |             |             |
|-------|----------|----|-------------------------------------------------------------|---|-------------------------------------------------------------------|-------------|-------------|-------------|--------------|-------------|-------------|
| EXON1 | GSTM2    | 1  | 110210684/110210770/110210699                               | 3 | cg03070194/cg07219542/cg08142344                                  | 0.115605779 | 0.204242237 | 0.294182994 | 0.178577215  | 4.04E-07    | 4.00E-06    |
| EXON1 | GSX1     | 13 | 28366814                                                    | 1 | cg26609631                                                        | 0.432714115 | 0.458144839 | 0.595039364 | 0.162325249  | 6.08E-07    | 5.69E-06    |
| EXON1 | GTSF1L   | 20 | 42355625/42354942/42354839                                  | 3 | cg11398517/cg23727943/cg24118151                                  | 0.713177073 | 0.624946717 | 0.555956691 | -0.157220382 | 1.69E-11    | 1.61E-09    |
| EXON1 | GUCA2A   | 1  | 42630335                                                    | 1 | cg05398883                                                        | 0.584170085 | 0.446874589 | 0.356594955 | -0.22757513  | 5.78E-11    | 3.47E-09    |
| EXON1 | GUCA2B   | 1  | 42619118/42619163                                           | 2 | cg15976404/cg19728577                                             | 0.652472495 | 0.540815244 | 0.454725536 | -0.197746959 | 1.61E-09    | 3.75E-08    |
| EXON1 | GUCY1B3  | 4  | 156680256/156680207                                         | 2 | cg03584891/cg16700392                                             | 0.418848618 | 0.499077622 | 0.617188584 | 0.198339967  | 1.79E-09    | 4.08E-08    |
| EXON1 | GYPC     | 2  | 127413831                                                   | 1 | cg15975865                                                        | 0.30371499  | 0.489046279 | 0.648228845 | 0.344513855  | 2.22E-08    | 3.35E-07    |
| EXON1 | GYS2     | 12 | 21757759/21757466                                           | 2 | cg04184278/cg06141025                                             | 0.64837717  | 0.5401587   | 0.437659693 | -0.210717477 | 1.17E-09    | 2.92E-08    |
| EXON1 | HAND2    | 4  | 174450016/174451251/174450722/174450353/174450408/174451141 | 6 | cg01580681/cg02774439/cg10541864/cg15707093/cg19178853/cg25102370 | 0.300950688 | 0.391175132 | 0.534724169 | 0.233773481  | 8.90E-07    | 8.02E-06    |
| EXON1 | HAPLN4   | 19 | 19373566/19373575                                           | 2 | cg01297721/cg22694191                                             | 0.33803368  | 0.375740819 | 0.525827877 | 0.187794197  | 0.000405526 | 0.001847349 |
| EXON1 | HBE1     | 11 | 5291298/5291214                                             | 2 | cg03306956/cg16279158                                             | 0.5609776   | 0.500748483 | 0.367565418 | -0.193412182 | 9.25E-09    | 1.62E-07    |
| EXON1 | HBQ1     | 16 | 230343/230341                                               | 2 | cg02401454/cg07703401                                             | 0.32724683  | 0.338138094 | 0.520321184 | 0.193074354  | 4.73E-05    | 0.000271373 |
| EXON1 | HCK      | 20 | 30640164/30640256/30640121                                  | 3 | cg08623947/cg13042543/cg24606935                                  | 0.094874883 | 0.177125793 | 0.29829087  | 0.203415987  | 0.000378298 | 0.00173647  |
| EXON1 | HCRTR2   | 6  | 55039232/55039259/55039382/55039295                         | 4 | cg10725720/cg13948987/cg17240815/cg27596495                       | 0.282031535 | 0.328409048 | 0.488993624 | 0.206962089  | 1.05E-07    | 1.26E-06    |
| EXON1 | HECW1    | 7  | 43152254/43152468                                           | 2 | cg08039116/cg17438849                                             | 0.341357783 | 0.396508517 | 0.493948634 | 0.152590852  | 2.01E-06    | 1.64E-05    |
| EXON1 | HELT     | 4  | 185940173                                                   | 1 | cg17186107                                                        | 0.251086025 | 0.284845711 | 0.490349859 | 0.239263834  | 7.71E-07    | 7.05E-06    |
| EXON1 | HEPACAM2 | 7  | 92848714/92855729                                           | 2 | cg04992673/cg11058951                                             | 0.704928635 | 0.603657517 | 0.540253266 | -0.164675369 | 1.18E-10    | 5.40E-09    |
| EXON1 | HEPHL1   | 11 | 93754390                                                    | 1 | cg18109485                                                        | 0.454738565 | 0.361792817 | 0.26383015  | -0.190908415 | 1.92E-12    | 3.84E-10    |
| EXON1 | HEPN1    | 11 | 124789499/124790365                                         | 2 | cg20325560/cg22871233                                             | 0.86396429  | 0.800697256 | 0.701462732 | -0.162501558 | 1.43E-05    | 9.42E-05    |
| EXON1 | HES3     | 1  | 6304272                                                     | 1 | cg22699074                                                        | 0.35536053  | 0.423482011 | 0.517931182 | 0.162570652  | 0.000234729 | 0.001134124 |
| EXON1 | HFE2     | 1  | 145413337/145413193                                         | 2 | cg00987513/cg06589885                                             | 0.715596228 | 0.667351964 | 0.561544945 | -0.154051282 | 5.60E-08    | 7.24E-07    |
| EXON1 | HGD      | 3  | 120401058/120401095                                         | 2 | cg04546097/cg14527029                                             | 0.534031683 | 0.436645867 | 0.35923247  | -0.174799212 | 2.45E-10    | 9.01E-09    |
| EXON1 | HHLA1    | 8  | 133117493                                                   | 1 | cg18187729                                                        | 0.47645342  | 0.331186889 | 0.240830777 | -0.235622643 | 2.35E-13    | 1.07E-10    |
| EXON1 | HIST1H4F | 6  | 26240920/26240782/26240939                                  | 3 | cg08260959/cg10723962/cg21425842                                  | 0.396915558 | 0.543511659 | 0.643314298 | 0.246398741  | 7.04E-09    | 1.29E-07    |

|       |          |    |                                                       |   |                                                                   |             |             |             |              |             |             |
|-------|----------|----|-------------------------------------------------------|---|-------------------------------------------------------------------|-------------|-------------|-------------|--------------|-------------|-------------|
| EXON1 | HMGCS2   | 1  | 120311542/120311439                                   | 2 | cg13976683/cg22718139                                             | 0.542833315 | 0.417908067 | 0.341307155 | -0.20152616  | 4.79E-11    | 3.07E-09    |
| EXON1 | HMX2     | 10 | 124907942/124908083/124907708                         | 3 | cg00474465/cg05189242/cg19909787                                  | 0.179368496 | 0.209047892 | 0.348239122 | 0.168870626  | 6.78E-05    | 0.000374947 |
| EXON1 | HMX3     | 10 | 124895886/124895638/124895697/124895693               | 4 | cg10491556/cg11628754/cg19564098/cg20403498                       | 0.153732523 | 0.206982268 | 0.329484849 | 0.175752327  | 0.000155028 | 0.000784569 |
| EXON1 | HNF4A    | 20 | 43029994/43029992/43029997/42984453                   | 4 | cg07064544/cg11542165/cg21058973/cg23792485                       | 0.643394972 | 0.525393524 | 0.420941898 | -0.222453073 | 4.99E-11    | 3.15E-09    |
| EXON1 | HOXA2    | 7  | 27142100/27142204/27141774/27142275/27142200          | 5 | cg04481096/cg06055873/cg17353412/cg20747380/cg26069745            | 0.408681513 | 0.517218417 | 0.664497248 | 0.255815735  | 5.11E-07    | 4.89E-06    |
| EXON1 | HOXB8    | 17 | 46692021/46692008/46691820/46692248/46692168          | 5 | cg04453140/cg06760710/cg08151857/cg15539420/cg22913933            | 0.440359205 | 0.310490867 | 0.262706035 | -0.17765317  | 2.86E-05    | 0.00017313  |
| EXON1 | HOXC10   | 12 | 54379609/54379056                                     | 2 | cg00699029/cg26153631                                             | 0.432911375 | 0.499609328 | 0.628421255 | 0.19550988   | 3.61E-08    | 5.03E-07    |
| EXON1 | HOXC11   | 12 | 54367460/54367250/54367008/54366909                   | 4 | cg03536474/cg07123069/cg15830509/cg22709192                       | 0.366256267 | 0.424192346 | 0.532338264 | 0.166081997  | 4.14E-08    | 5.63E-07    |
| EXON1 | HOXC13   | 12 | 54333179/54333323/54333224/54332992/54332695/54332624 | 6 | cg03972398/cg07892422/cg11255394/cg16856286/cg19977966/cg25671500 | 0.406879896 | 0.47553009  | 0.578163491 | 0.171283595  | 2.70E-09    | 5.69E-08    |
| EXON1 | HOXC9    | 12 | 54393966/54393971/54394194/54394212/54394116          | 5 | cg05069426/cg12071536/cg12699286/cg24500832/cg25456468            | 0.295738199 | 0.348657289 | 0.573071898 | 0.2773337    | 9.21E-08    | 1.12E-06    |
| EXON1 | HS3ST2   | 16 | 22826113/22826243/22826117                            | 3 | cg03757784/cg08214995/cg19064258                                  | 0.366387783 | 0.449275592 | 0.592313416 | 0.225925633  | 2.05E-07    | 2.23E-06    |
| EXON1 | HS3ST3A1 | 17 | 13504687/13504008/13505174/13504399/13504472          | 5 | cg03436461/cg04211115/cg07480567/cg18255166/cg22583981            | 0.371618757 | 0.451906654 | 0.555304765 | 0.183686008  | 1.02E-07    | 1.22E-06    |
| EXON1 | HSPB2    | 11 | 111783563/111783499                                   | 2 | cg11694519/cg12947833                                             | 0.51541418  | 0.643971275 | 0.732348393 | 0.216934213  | 1.24E-10    | 5.58E-09    |
| EXON1 | HSPB3    | 5  | 53751493/53751919/53752133                            | 3 | cg01246617/cg11391732/cg21168101                                  | 0.760983625 | 0.678681707 | 0.60616392  | -0.154819705 | 2.01E-09    | 4.51E-08    |

|       |       |    |                                                                            |   |                                                                                              |             |             |             |              |             |             |
|-------|-------|----|----------------------------------------------------------------------------|---|----------------------------------------------------------------------------------------------|-------------|-------------|-------------|--------------|-------------|-------------|
| EXON1 | HTR1A | 5  | 63257499/6325692<br>6/63256619/632562<br>85/63257092                       | 5 | cg04427003/cg04799<br>838/cg10588470/cg2<br>3448729/cg27615388                               | 0.423006308 | 0.497169644 | 0.577117131 | 0.154110823  | 4.52E-09    | 8.89E-08    |
| EXON1 | HTR1B | 6  | 78172691/7817233<br>7/78172192/781729<br>50                                | 4 | cg00181439/cg15368<br>905/cg21232620/cg2<br>5763788                                          | 0.398094659 | 0.482755352 | 0.627270459 | 0.2291758    | 3.17E-10    | 1.09E-08    |
| EXON1 | HTR1E | 6  | 87647154/8764739<br>9/87647147/876473<br>76/87647129/87647<br>527/87647370 | 7 | cg02928916/cg04278<br>702/cg07833420/cg0<br>9297468/cg09863441<br>/cg10135483/cg1477<br>4364 | 0.273100513 | 0.369062302 | 0.56478146  | 0.291680947  | 5.87E-09    | 1.11E-07    |
| EXON1 | HTR3E | 3  | 183817976/183818<br>368                                                    | 2 | cg01953456/cg26153<br>642                                                                    | 0.632772755 | 0.5249243   | 0.437669218 | -0.195103537 | 9.38E-09    | 1.64E-07    |
| EXON1 | HTR7  | 10 | 92617162/9261742<br>9/92617562                                             | 3 | cg06291867/cg15364<br>725/cg26135506                                                         | 0.283561111 | 0.327760229 | 0.454404764 | 0.170843653  | 3.53E-05    | 0.000208598 |
| EXON1 | HTRA3 | 4  | 8271507/8271792                                                            | 2 | cg09495977/cg23365<br>637                                                                    | 0.246006178 | 0.249152199 | 0.40332575  | 0.157319573  | 0.002922907 | 0.010849365 |
| EXON1 | IFNA8 | 9  | 21409505                                                                   | 1 | cg15669228                                                                                   | 0.68945982  | 0.614549933 | 0.486504291 | -0.202955529 | 5.16E-08    | 6.76E-07    |
| EXON1 | IGFL3 | 19 | 46627896                                                                   | 1 | cg15507486                                                                                   | 0.5851034   | 0.4689182   | 0.341397627 | -0.243705773 | 6.11E-12    | 7.73E-10    |
| EXON1 | IGFL4 | 19 | 46544240                                                                   | 1 | cg27048142                                                                                   | 0.61426804  | 0.466338333 | 0.368022105 | -0.246245935 | 1.02E-09    | 2.62E-08    |
| EXON1 | IL12B | 5  | 158757456                                                                  | 1 | cg18307303                                                                                   | 0.651192595 | 0.548948333 | 0.458741455 | -0.19245114  | 6.27E-08    | 7.99E-07    |
| EXON1 | IL1F9 | 2  | 113735612                                                                  | 1 | cg15657888                                                                                   | 0.43023582  | 0.325292839 | 0.273220991 | -0.157014829 | 4.65E-12    | 6.53E-10    |
| EXON1 | IL1R2 | 2  | 102615524/102608<br>349                                                    | 2 | cg12910851/cg20340<br>242                                                                    | 0.41936118  | 0.312422933 | 0.241203418 | -0.178157762 | 7.27E-11    | 4.02E-09    |
| EXON1 | IL22  | 12 | 68647280                                                                   | 1 | cg11520493                                                                                   | 0.83779575  | 0.797853883 | 0.657353691 | -0.180442059 | 3.79E-06    | 2.89E-05    |
| EXON1 | IL25  | 14 | 23842125                                                                   | 1 | cg07258507                                                                                   | 0.42593412  | 0.331148294 | 0.238360264 | -0.187573856 | 2.46E-11    | 1.98E-09    |
| EXON1 | IL4   | 5  | 132009630                                                                  | 1 | cg12377972                                                                                   | 0.79358193  | 0.722593817 | 0.610814186 | -0.182767744 | 1.10E-06    | 9.70E-06    |
| EXON1 | INHBA | 7  | 41742630                                                                   | 1 | cg11079619                                                                                   | 0.67982674  | 0.570753806 | 0.474324818 | -0.205501922 | 3.82E-08    | 5.28E-07    |
| EXON1 | INHBB | 2  | 121104029/121104<br>187                                                    | 2 | cg02173749/cg03699<br>182                                                                    | 0.185696665 | 0.210141327 | 0.36664773  | 0.180951065  | 8.47E-05    | 0.000455244 |
| EXON1 | IQCF2 | 3  | 51895692                                                                   | 1 | cg14940420                                                                                   | 0.690985415 | 0.567873522 | 0.437973032 | -0.253012383 | 1.92E-07    | 2.11E-06    |
| EXON1 | IRAK3 | 12 | 66583029/6658320<br>3/66583048                                             | 3 | cg01263292/cg10389<br>229/cg26415547                                                         | 0.092280667 | 0.152925613 | 0.311538727 | 0.21925806   | 1.53E-05    | 9.98E-05    |
| EXON1 | IRF4  | 6  | 391764                                                                     | 1 | cg17228900                                                                                   | 0.100866439 | 0.314322966 | 0.585962585 | 0.485096146  | 1.58E-08    | 2.49E-07    |
| EXON1 | IRX4  | 5  | 1882775/1882871                                                            | 2 | cg03679565/cg03963<br>198                                                                    | 0.296017495 | 0.365641589 | 0.537900323 | 0.241882828  | 0.000114971 | 0.000599033 |

|       |         |    |                                                                                                                                                 |                                                                                                                                                                            |             |             |             |              |            |             |
|-------|---------|----|-------------------------------------------------------------------------------------------------------------------------------------------------|----------------------------------------------------------------------------------------------------------------------------------------------------------------------------|-------------|-------------|-------------|--------------|------------|-------------|
| EXON1 | ISLR2   | 15 | 74422275/7442275<br>0/74421935/744218<br>57/74421739/74421<br>848/74422935/7442 13<br>1887/74422761/744<br>22282/74422933/74<br>421918/74421909 | cg00550503/cg02378<br>847/cg02709205/cg0<br>6041677/cg07216112<br>/cg08703540/cg1131<br>5754/cg12017911/cg<br>21063758/cg2315288<br>5/cg24374861/cg257<br>05558/cg27200833 | 0.211121754 | 0.244540606 | 0.386707196 | 0.175585442  | 2.07E-05   | 0.000130371 |
| EXON1 | ITGA4   | 2  | 182322268/182322<br>058/182321855/182 6<br>322279/182322501/<br>182321786                                                                       | cg06952671/cg10526<br>659/cg20415809/cg2<br>1995919/cg25024074<br>/cg25652029                                                                                              | 0.260763156 | 0.458986749 | 0.611804352 | 0.351041196  | 4.37E-10   | 1.36E-08    |
| EXON1 | ITGA8   | 10 | 15761657                                                                                                                                        | cg01078989                                                                                                                                                                 | 0.197064855 | 0.313386939 | 0.426789773 | 0.229724918  | 4.06E-06   | 3.06E-05    |
| EXON1 | ITGB6   | 2  | 161056520                                                                                                                                       | cg21105318                                                                                                                                                                 | 0.499303555 | 0.393083061 | 0.310163259 | -0.189140296 | 2.60E-11   | 2.03E-09    |
| EXON1 | ITIH2   | 10 | 7745454                                                                                                                                         | cg06224510                                                                                                                                                                 | 0.52290188  | 0.361924694 | 0.230658309 | -0.292243571 | 9.34E-14   | 5.47E-11    |
| EXON1 | ITIH4   | 3  | 52864659/5286469 2<br>4                                                                                                                         | cg10929387/cg11645<br>453                                                                                                                                                  | 0.718289485 | 0.606850944 | 0.554575986 | -0.163713499 | 1.61E-06   | 1.35E-05    |
| EXON1 | ITIH5   | 10 | 7661611/7708869/7 3<br>708805                                                                                                                   | cg00677195/cg04711<br>998/cg22444507                                                                                                                                       | 0.393885451 | 0.476519057 | 0.592943632 | 0.199058181  | 4.97E-09   | 9.60E-08    |
| EXON1 | IYD     | 6  | 150690125/150690 2<br>143                                                                                                                       | cg02307277/cg20416<br>179                                                                                                                                                  | 0.531765885 | 0.431119939 | 0.344286614 | -0.187479271 | 4.21E-11   | 2.84E-09    |
| EXON1 | IZUMO1  | 19 | 49249932/4925008 2<br>0                                                                                                                         | cg10234985/cg18537<br>730                                                                                                                                                  | 0.491661105 | 0.579073742 | 0.712085841 | 0.220424736  | 2.33E-09   | 5.04E-08    |
| EXON1 | JAKMIP1 | 4  | 6202091                                                                                                                                         | cg01519742                                                                                                                                                                 | 0.131983322 | 0.208737012 | 0.290841264 | 0.158857942  | 1.47E-05   | 9.66E-05    |
| EXON1 | JAM2    | 21 | 27011788/2701217 5<br>6/27011963/270117<br>93/27012066                                                                                          | cg02485200/cg03382<br>304/cg13769223/cg1<br>4553600/cg22627390                                                                                                             | 0.119049045 | 0.211693495 | 0.363780131 | 0.244731086  | 3.83E-06   | 2.91E-05    |
| EXON1 | JAM3    | 11 | 133938941                                                                                                                                       | cg02174225                                                                                                                                                                 | 0.125843112 | 0.265508881 | 0.442115258 | 0.316272146  | 9.84E-08   | 1.18E-06    |
| EXON1 | JPH3    | 16 | 87636539/8763678 3<br>2/87636594                                                                                                                | cg08145698/cg09552<br>213/cg10453425                                                                                                                                       | 0.133119763 | 0.238026907 | 0.346069867 | 0.212950105  | 1.40E-06   | 1.20E-05    |
| EXON1 | KANK1   | 9  | 707166                                                                                                                                          | cg14399863                                                                                                                                                                 | 0.515628    | 0.623913972 | 0.715907782 | 0.200279782  | 4.18E-09   | 8.34E-08    |
| EXON1 | KATNAL2 | 18 | 44526867                                                                                                                                        | cg05529506                                                                                                                                                                 | 0.053363597 | 0.135794353 | 0.245377774 | 0.192014177  | 0.00010515 | 0.000552214 |
| EXON1 | KAZALD1 | 10 | 102821427/102821 6<br>670/102821684/102<br>821848/102821552/<br>102821565                                                                       | cg07638935/cg08227<br>353/cg12060422/cg1<br>5302379/cg23534216<br>/cg26605164                                                                                              | 0.448643923 | 0.345533509 | 0.266995382 | -0.181648541 | 2.94E-12   | 5.13E-10    |
| EXON1 | KCNA1   | 12 | 5019311/5019482/5 3<br>019091                                                                                                                   | cg09487611/cg10363<br>246/cg12908522                                                                                                                                       | 0.126730906 | 0.241964179 | 0.476888771 | 0.350157865  | 1.56E-07   | 1.76E-06    |



|       |          |    |                                                                                                     |    |                                                                                                               |             |             |             |              |             |             |
|-------|----------|----|-----------------------------------------------------------------------------------------------------|----|---------------------------------------------------------------------------------------------------------------|-------------|-------------|-------------|--------------|-------------|-------------|
| EXON1 | KCNA3    | 1  | 111217575/111217497/111216387/111216000/111216839/111214851/111216332/111217194/111216661/111217406 | 10 | cg01423964/cg11595545/cg13925011/cg14200574/cg15726426/cg17033047/cg19942256/cg20302133/cg21286921/cg26013553 | 0.385808761 | 0.49588748  | 0.584506598 | 0.198697838  | 2.82E-12    | 4.99E-10    |
| EXON1 | KCNA4    | 11 | 30038310/30038286                                                                                   | 2  | cg15183083/cg27319123                                                                                         | 0.342299205 | 0.441663047 | 0.574568002 | 0.232268797  | 1.70E-07    | 1.90E-06    |
| EXON1 | KCNC2    | 12 | 75603343/75603401/75603184/75603068/75603480                                                        | 5  | cg11308277/cg18573383/cg21500166/cg26074603/cg27154343                                                        | 0.382166804 | 0.505617997 | 0.63906464  | 0.256897836  | 3.01E-10    | 1.06E-08    |
| EXON1 | KCNH5    | 14 | 63511872                                                                                            | 1  | cg11755405                                                                                                    | 0.38196622  | 0.495121994 | 0.6589143   | 0.27694808   | 1.88E-10    | 7.44E-09    |
| EXON1 | KCNH7    | 2  | 163695190/163695111                                                                                 | 2  | cg10132588/cg14781189                                                                                         | 0.41570884  | 0.508834197 | 0.626071409 | 0.210362569  | 1.41E-10    | 6.16E-09    |
| EXON1 | KCNK12   | 2  | 47797415/47797133                                                                                   | 2  | cg02318629/cg13223402                                                                                         | 0.116632551 | 0.206696124 | 0.337202411 | 0.22056986   | 3.42E-08    | 4.84E-07    |
| EXON1 | KCNQ2    | 20 | 62103627/62103541                                                                                   | 2  | cg08003150/cg26495865                                                                                         | 0.049402304 | 0.116375314 | 0.215174603 | 0.165772299  | 0.000104027 | 0.00054697  |
| EXON1 | KCNQ5    | 6  | 73331680/73331652/73332073                                                                          | 3  | cg03786924/cg15717808/cg24687051                                                                              | 0.241818556 | 0.390541533 | 0.588875241 | 0.347056685  | 1.78E-11    | 1.66E-09    |
| EXON1 | KCTD8    | 4  | 44450234/44450358/44449738                                                                          | 3  | cg10059660/cg12300353/cg20646280                                                                              | 0.354856387 | 0.402319196 | 0.602880356 | 0.248023969  | 4.67E-11    | 3.01E-09    |
| EXON1 | KDR      | 4  | 55991418/55991683/55991701                                                                          | 3  | cg07098391/cg10740902/cg25722465                                                                              | 0.523004225 | 0.591848633 | 0.682941223 | 0.159936998  | 3.79E-10    | 1.22E-08    |
| EXON1 | KERA     | 12 | 91451819                                                                                            | 1  | cg20332354                                                                                                    | 0.574654435 | 0.43442825  | 0.333692345 | -0.24096209  | 4.87E-11    | 3.11E-09    |
| EXON1 | KHDRBS2  | 6  | 62995876/62996022/62995963                                                                          | 3  | cg00472801/cg16587616/cg18239753                                                                              | 0.395316767 | 0.479496617 | 0.604159612 | 0.208842845  | 8.58E-08    | 1.05E-06    |
| EXON1 | KIAA1383 | 1  | 232941775/232940990/232941055/232944625/232941530/232941706/232941253/232941468/232941176           | 9  | cg00951395/cg02191044/cg02903907/cg03756929/cg05460318/cg06935979/cg15542798/cg16430166/cg18196782            | 0.368493227 | 0.417297662 | 0.527028638 | 0.158535411  | 7.16E-06    | 5.04E-05    |
| EXON1 | KIAA1683 | 19 | 18385244                                                                                            | 1  | cg15084902                                                                                                    | 0.505192385 | 0.391143    | 0.343202486 | -0.161989899 | 2.18E-07    | 2.35E-06    |
| EXON1 | KIF5A    | 12 | 57944059/57943921/57944044                                                                          | 3  | cg04270799/cg19323374/cg24405617                                                                              | 0.140581884 | 0.171334904 | 0.294062288 | 0.153480405  | 1.11E-05    | 7.47E-05    |
| EXON1 | KIF5C    | 2  | 149632960/149633226/149633112                                                                       | 3  | cg11650013/cg12035092/cg24461964                                                                              | 0.071515292 | 0.156074336 | 0.259239909 | 0.187724617  | 0.000207364 | 0.001018271 |

|       |            |    |                                                                            |   |                                                                                              |             |             |             |              |             |             |
|-------|------------|----|----------------------------------------------------------------------------|---|----------------------------------------------------------------------------------------------|-------------|-------------|-------------|--------------|-------------|-------------|
| EXON1 | KIRREL2    | 19 | 36347907/3634803<br>4/36347919                                             | 3 | cg00519185/cg06945<br>936/cg09479015                                                         | 0.162045664 | 0.267688109 | 0.350421579 | 0.188375915  | 0.000146957 | 0.000745722 |
| EXON1 | KLB        | 4  | 39408665                                                                   | 1 | cg21880903                                                                                   | 0.538633785 | 0.439864594 | 0.34328745  | -0.195346335 | 5.16E-10    | 1.56E-08    |
| EXON1 | KLHL1      | 13 | 70682098/7068201<br>9/70682324/706826<br>04/70682127/70682<br>525/70681804 | 7 | cg01661350/cg12917<br>718/cg20523861/cg2<br>3267558/cg24014143<br>/cg24401870/cg2551<br>4273 | 0.389431144 | 0.460954766 | 0.551210339 | 0.161779195  | 9.40E-08    | 1.14E-06    |
| EXON1 | KLK11      | 19 | 51530751/5152984<br>6                                                      | 2 | cg24762501/cg26310<br>000                                                                    | 0.7145356   | 0.625658072 | 0.544115091 | -0.170420509 | 1.43E-08    | 2.32E-07    |
| EXON1 | KLK12      | 19 | 51538134                                                                   | 1 | cg24368865                                                                                   | 0.46914602  | 0.380552894 | 0.280538386 | -0.188607634 | 2.98E-10    | 1.05E-08    |
| EXON1 | KLK8       | 19 | 51504823                                                                   | 1 | cg15153394                                                                                   | 0.5790325   | 0.513655728 | 0.415149877 | -0.163882623 | 2.05E-06    | 1.67E-05    |
| EXON1 | KLKB1      | 4  | 187148688                                                                  | 1 | cg12536028                                                                                   | 0.557554245 | 0.435691661 | 0.345760305 | -0.21179394  | 1.79E-10    | 7.16E-09    |
| EXON1 | KPNA7      | 7  | 98805084                                                                   | 1 | cg22498453                                                                                   | 0.764286435 | 0.594902611 | 0.590208441 | -0.174077994 | 3.57E-10    | 1.17E-08    |
| EXON1 | KRBA1      | 7  | 149412290                                                                  | 1 | cg03788131                                                                                   | 0.138089557 | 0.242209075 | 0.483524739 | 0.345435182  | 1.87E-09    | 4.24E-08    |
| EXON1 | KRT20      | 17 | 39041266/3904119<br>9/39041119/390411<br>10                                | 4 | cg19114576/cg19449<br>377/cg23901700/cg2<br>5124433                                          | 0.783862687 | 0.553260496 | 0.399192683 | -0.384670003 | 1.24E-12    | 3.03E-10    |
| EXON1 | KRT31      | 17 | 39553736                                                                   | 1 | cg20125516                                                                                   | 0.537462945 | 0.431333867 | 0.3549294   | -0.182533545 | 2.82E-11    | 2.17E-09    |
| EXON1 | KRT33A     | 17 | 39506964/3950693<br>8                                                      | 2 | cg00629088/cg15983<br>005                                                                    | 0.637122283 | 0.539671822 | 0.449566309 | -0.187555973 | 1.22E-11    | 1.28E-09    |
| EXON1 | KRT38      | 17 | 39597402                                                                   | 1 | cg25306838                                                                                   | 0.4231071   | 0.347799894 | 0.264167418 | -0.158939682 | 4.41E-10    | 1.36E-08    |
| EXON1 | KRT7       | 12 | 52627342/5262704<br>7/52627272                                             | 3 | cg09522147/cg09670<br>128/cg25313172                                                         | 0.421868168 | 0.536565783 | 0.689640498 | 0.26777233   | 2.68E-11    | 2.08E-09    |
| EXON1 | KRT72      | 12 | 52995070/5299525<br>0/52995295/529949<br>33                                | 4 | cg10292376/cg18161<br>890/cg20050826/cg2<br>3337631                                          | 0.555931681 | 0.639695472 | 0.712559533 | 0.156627852  | 1.45E-09    | 3.47E-08    |
| EXON1 | KRT80      | 12 | 52585695                                                                   | 1 | cg16432350                                                                                   | 0.55077068  | 0.459402311 | 0.381649923 | -0.169120757 | 1.30E-09    | 3.17E-08    |
| EXON1 | KRTAP10-1  | 21 | 45959142                                                                   | 1 | cg17903229                                                                                   | 0.46414623  | 0.348451517 | 0.299173286 | -0.164972944 | 2.59E-07    | 2.72E-06    |
| EXON1 | KRTAP10-11 | 21 | 46067411/4606694<br>2                                                      | 2 | cg00947859/cg04218<br>030                                                                    | 0.46744202  | 0.381149633 | 0.308647309 | -0.158794711 | 1.42E-08    | 2.32E-07    |
| EXON1 | KRTAP10-8  | 21 | 46032026/4603208<br>6                                                      | 2 | cg17778867/cg26386<br>968                                                                    | 0.658003125 | 0.556273314 | 0.492793645 | -0.16520948  | 7.89E-07    | 7.20E-06    |
| EXON1 | KRTAP11-1  | 21 | 32253206/3225376<br>0/32253584                                             | 3 | cg02930687/cg07014<br>174/cg12111295                                                         | 0.633474755 | 0.555026842 | 0.457464657 | -0.176010098 | 7.48E-10    | 2.10E-08    |
| EXON1 | KRTAP12-2  | 21 | 46086578                                                                   | 1 | cg17970078                                                                                   | 0.73003605  | 0.690192767 | 0.556822914 | -0.173213136 | 6.36E-06    | 4.54E-05    |
| EXON1 | KRTAP15-1  | 21 | 31813075                                                                   | 1 | cg16812893                                                                                   | 0.59362799  | 0.440570944 | 0.334187759 | -0.259440231 | 3.58E-13    | 1.35E-10    |
| EXON1 | KRTAP19-1  | 21 | 31852504                                                                   | 1 | cg06692927                                                                                   | 0.7788402   | 0.700502217 | 0.623202464 | -0.155637736 | 1.98E-05    | 0.000125078 |
| EXON1 | KRTAP21-2  | 21 | 32119309                                                                   | 1 | cg23581186                                                                                   | 0.679008385 | 0.542251406 | 0.39001255  | -0.288995835 | 2.13E-10    | 8.20E-09    |
| EXON1 | KRTAP23-1  | 21 | 31720835                                                                   | 1 | cg18594551                                                                                   | 0.65171676  | 0.562210428 | 0.464774514 | -0.186942246 | 4.01E-10    | 1.28E-08    |

|       |              |    |                               |   |                                  |             |             |             |              |             |             |
|-------|--------------|----|-------------------------------|---|----------------------------------|-------------|-------------|-------------|--------------|-------------|-------------|
| EXON1 | KRTAP24-1    | 21 | 31654844/31654005/31655261    | 3 | cg02131862/cg03721387/cg07172334 | 0.66400019  | 0.542804124 | 0.469869259 | -0.194130931 | 2.29E-12    | 4.33E-10    |
| EXON1 | KRTAP4-12    | 17 | 39279735                      | 1 | cg10686758                       | 0.445949885 | 0.330617539 | 0.281250095 | -0.16469979  | 1.68E-09    | 3.88E-08    |
| EXON1 | KRTAP7-1     | 21 | 32202010                      | 1 | cg05533037                       | 0.61733834  | 0.439819778 | 0.331629845 | -0.285708495 | 4.13E-11    | 2.84E-09    |
| EXON1 | KRTAP8-1     | 21 | 32185331/32185365             | 2 | cg12346967/cg24423088            | 0.722758035 | 0.599290661 | 0.512131177 | -0.210626858 | 8.78E-08    | 1.07E-06    |
| EXON1 | KY           | 3  | 134369828                     | 1 | cg23201032                       | 0.232375405 | 0.286864915 | 0.3872008   | 0.154825395  | 0.000320049 | 0.001494503 |
| EXON1 | L1TD1        | 1  | 62660556                      | 1 | cg19594218                       | 0.36242214  | 0.2872157   | 0.210043786 | -0.152378354 | 2.29E-10    | 8.57E-09    |
| EXON1 | LAMA1        | 18 | 7117680/7117790               | 2 | cg07846220/cg18764577            | 0.361940153 | 0.458143292 | 0.61602922  | 0.254089068  | 7.13E-12    | 8.81E-10    |
| EXON1 | LAMB3        | 1  | 209825747/209825672/209825731 | 3 | cg03977657/cg26107033/cg26533764 | 0.561902485 | 0.458811914 | 0.382028341 | -0.179874144 | 1.09E-10    | 5.10E-09    |
| EXON1 | LAYN         | 11 | 111411289/111411381           | 2 | cg02532096/cg03864000            | 0.291250943 | 0.420109953 | 0.501159723 | 0.20990878   | 7.65E-06    | 5.35E-05    |
| EXON1 | LBXCOR1      | 15 | 68118006                      | 1 | cg17082347                       | 0.135106277 | 0.183650134 | 0.36080405  | 0.225697774  | 0.000144605 | 0.000735193 |
| EXON1 | LCE1B        | 1  | 152784914/152785473           | 2 | cg07090653/cg12449852            | 0.729669125 | 0.6528083   | 0.479028127 | -0.250640998 | 1.89E-06    | 1.56E-05    |
| EXON1 | LCE1D        | 1  | 152769246                     | 1 | cg11583211                       | 0.5111435   | 0.4167869   | 0.316977677 | -0.194165823 | 1.19E-09    | 2.96E-08    |
| EXON1 | LCN2         | 9  | 130911792                     | 1 | cg22438810                       | 0.47500126  | 0.371037206 | 0.284364823 | -0.190636437 | 4.28E-12    | 6.29E-10    |
| EXON1 | LGALS4       | 19 | 39303506/39303698             | 2 | cg16731016/cg19419519            | 0.565538958 | 0.443910339 | 0.351229698 | -0.21430926  | 2.49E-10    | 9.09E-09    |
| EXON1 | LHCGR        | 2  | 48982683/48982754/48982832    | 3 | cg00209038/cg13423075/cg20156659 | 0.419088745 | 0.4553261   | 0.617299805 | 0.19821106   | 2.31E-09    | 5.02E-08    |
| EXON1 | LHFPL4       | 3  | 9595395                       | 1 | cg19822251                       | 0.3022505   | 0.373086122 | 0.478690786 | 0.176440286  | 4.01E-08    | 5.48E-07    |
| EXON1 | LIFR         | 5  | 38595383/38556435             | 2 | cg05912079/cg12587766            | 0.446497587 | 0.507735082 | 0.604393019 | 0.157895432  | 9.21E-06    | 6.32E-05    |
| EXON1 | LILRA6       | 19 | 54746613                      | 1 | cg19835973                       | 0.72572726  | 0.584950672 | 0.542445532 | -0.183281728 | 6.83E-05    | 0.000376701 |
| EXON1 | LILRB3       | 19 | 54726870                      | 1 | cg15816012                       | 0.64083175  | 0.532339556 | 0.488177741 | -0.152654009 | 1.77E-06    | 1.47E-05    |
| EXON1 | LIN28        | 1  | 26737318/26737272             | 2 | cg02388865/cg19706817            | 0.316462558 | 0.4353874   | 0.497957273 | 0.181494715  | 7.56E-07    | 6.94E-06    |
| EXON1 | LIN28B       | 6  | 105405068                     | 1 | cg04560456                       | 0.330428215 | 0.378783794 | 0.543564627 | 0.213136412  | 2.34E-06    | 1.88E-05    |
| EXON1 | LMO1         | 11 | 8285086/8284997/8285031       | 3 | cg05245226/cg07283152/cg21460402 | 0.147183635 | 0.161614728 | 0.299076456 | 0.151892821  | 0.001208018 | 0.004915678 |
| EXON1 | LMX1A        | 1  | 165324810/165324990           | 2 | cg14662355/cg24650501            | 0.200555817 | 0.223314299 | 0.353967346 | 0.153411529  | 0.007483472 | 0.025075698 |
| EXON1 | LOC100302652 | 2  | 54087008/54087028/54087066    | 3 | cg01876338/cg14832904/cg19961545 | 0.543281248 | 0.671198724 | 0.80921843  | 0.265937182  | 6.06E-14    | 4.72E-11    |
| EXON1 | LOC401387    | 7  | 91792839                      | 1 | cg04644523                       | 0.80108622  | 0.736191411 | 0.616002973 | -0.185083247 | 7.44E-06    | 5.22E-05    |

|       |           |    |                                                                 |   |                                                                                         |             |             |             |              |             |             |
|-------|-----------|----|-----------------------------------------------------------------|---|-----------------------------------------------------------------------------------------|-------------|-------------|-------------|--------------|-------------|-------------|
| EXON1 | LOC728392 | 17 | 5403516/5403879/5404508/5403907/5404090/5403805/5404330/5404337 | 8 | cg00343839/cg01433610/cg06462347/cg08554115/cg12848098/cg16558432/cg22298430/cg27230784 | 0.11312254  | 0.152819626 | 0.296134267 | 0.183011727  | 0.000246752 | 0.001182711 |
| EXON1 | LONRF2    | 2  | 100937944/100939045/100938444/100938903/100938813/100938799     | 6 | cg03559235/cg07304692/cg14348439/cg14675211/cg14997226/cg23977631                       | 0.084088822 | 0.258085331 | 0.391470726 | 0.307381903  | 4.06E-08    | 5.54E-07    |
| EXON1 | LOXHD1    | 18 | 44236918/44099028/44139159                                      | 3 | cg06520279/cg12934788/cg20454888                                                        | 0.666217658 | 0.598453056 | 0.515179192 | -0.151038466 | 3.15E-10    | 1.08E-08    |
| EXON1 | LPPR5     | 1  | 99470129/99470207                                               | 2 | cg14991984/cg18623672                                                                   | 0.270830868 | 0.405834217 | 0.581562782 | 0.310731914  | 1.66E-10    | 6.94E-09    |
| EXON1 | LRFN5     | 14 | 42077674/42077327/42077061                                      | 3 | cg04784672/cg21547690/cg26967167                                                        | 0.262014391 | 0.338581776 | 0.508601712 | 0.246587321  | 1.87E-08    | 2.89E-07    |
| EXON1 | LRG1      | 19 | 4540003                                                         | 1 | cg22375763                                                                              | 0.454345995 | 0.358875856 | 0.297928741 | -0.156417254 | 4.31E-07    | 4.22E-06    |
| EXON1 | LRRC30    | 18 | 7231534                                                         | 1 | cg16326062                                                                              | 0.731889485 | 0.653939206 | 0.565861873 | -0.166027612 | 4.71E-08    | 6.24E-07    |
| EXON1 | LRRC31    | 3  | 169587454                                                       | 1 | cg12183875                                                                              | 0.565481385 | 0.430653789 | 0.324949809 | -0.240531576 | 4.74E-12    | 6.53E-10    |
| EXON1 | LRRC3B    | 3  | 26664404/26664308/26664621                                      | 3 | cg03496122/cg18679410/cg26035366                                                        | 0.342295433 | 0.425779706 | 0.567975393 | 0.225679961  | 3.23E-12    | 5.34E-10    |
| EXON1 | LRRC4B    | 19 | 51071294                                                        | 1 | cg00908733                                                                              | 0.222528575 | 0.263188078 | 0.381361082 | 0.158832507  | 0.003323802 | 0.01219711  |
| EXON1 | LRRC4C    | 11 | 40314618/40315404/40315392/40314978/40314771/40315337           | 6 | cg09147985/cg17579667/cg17949440/cg19849428/cg22645719/cg23850899                       | 0.428304199 | 0.444728341 | 0.643843741 | 0.215539542  | 1.47E-08    | 2.36E-07    |
| EXON1 | LRRC66    | 4  | 52883367                                                        | 1 | cg23789604                                                                              | 0.52948459  | 0.395611372 | 0.314139909 | -0.215344681 | 6.74E-11    | 3.86E-09    |
| EXON1 | LRRIQ4    | 3  | 169539775/169540297/169540504/169540079                         | 4 | cg04748593/cg13793580/cg18155853/cg23081534                                             | 0.810342383 | 0.576680539 | 0.389583758 | -0.420758625 | 1.79E-14    | 3.38E-11    |
| EXON1 | LTBP2     | 14 | 75078611/75078834/75078283/75078842                             | 4 | cg03802461/cg12921961/cg15926671/cg20718816                                             | 0.263384902 | 0.312184188 | 0.440212553 | 0.176827651  | 1.50E-06    | 1.27E-05    |
| EXON1 | LTF       | 3  | 46506374                                                        | 1 | cg15261665                                                                              | 0.51536741  | 0.585800356 | 0.667935541 | 0.152568131  | 6.48E-09    | 1.21E-07    |
| EXON1 | LUM       | 12 | 91505197                                                        | 1 | cg10401088                                                                              | 0.41827388  | 0.367109339 | 0.254836577 | -0.163437303 | 2.41E-05    | 0.000148649 |
| EXON1 | LUZP2     | 11 | 24518737/24518776                                               | 2 | cg06931933/cg09717526                                                                   | 0.277360133 | 0.309575603 | 0.460539434 | 0.183179302  | 2.11E-05    | 0.000132291 |
| EXON1 | LVRN      | 5  | 115298920/115298511/115298704/115298231/115298720               | 5 | cg06410191/cg07224726/cg22010052/cg22489785/cg25044651                                  | 0.381499909 | 0.4665959   | 0.60040156  | 0.218901651  | 2.16E-10    | 8.27E-09    |

|       |          |    |                                     |   |                                             |             |             |             |              |             |             |
|-------|----------|----|-------------------------------------|---|---------------------------------------------|-------------|-------------|-------------|--------------|-------------|-------------|
| EXON1 | LY6H     | 8  | 144241434/144242029/144241407       | 3 | cg02539855/cg03699469/cg23484951            | 0.160616104 | 0.247647482 | 0.369943235 | 0.209327132  | 5.93E-05    | 0.000332183 |
| EXON1 | LY86     | 6  | 6589075                             | 1 | cg02212836                                  | 0.51580359  | 0.6107202   | 0.673016159 | 0.157212569  | 1.30E-10    | 5.79E-09    |
| EXON1 | LY96     | 8  | 74903761                            | 1 | cg13213009                                  | 0.51478751  | 0.629726933 | 0.686249568 | 0.171462058  | 2.96E-08    | 4.29E-07    |
| EXON1 | LYPD5    | 19 | 44324747/44306565                   | 2 | cg11898486/cg12072164                       | 0.386054995 | 0.4309358   | 0.601844391 | 0.215789396  | 4.64E-06    | 3.44E-05    |
| EXON1 | LYZ      | 12 | 69742232                            | 1 | cg16097772                                  | 0.50166135  | 0.387022656 | 0.296439909 | -0.205221441 | 1.47E-12    | 3.13E-10    |
| EXON1 | LYZL4    | 3  | 42451986                            | 1 | cg25867632                                  | 0.484291835 | 0.381461239 | 0.304597891 | -0.179693944 | 1.94E-08    | 2.98E-07    |
| EXON1 | MADCAM1  | 19 | 496528                              | 1 | cg02783799                                  | 0.27667364  | 0.31780925  | 0.436273664 | 0.159600024  | 0.000112976 | 0.000589105 |
| EXON1 | MAL      | 2  | 95691500                            | 1 | cg22403344                                  | 0.132396917 | 0.293686192 | 0.438046159 | 0.305649243  | 1.19E-08    | 1.99E-07    |
| EXON1 | MAMSTR   | 19 | 49220102/49220142                   | 2 | cg15475323/cg18046677                       | 0.479300838 | 0.396879964 | 0.310396886 | -0.168903951 | 7.75E-09    | 1.39E-07    |
| EXON1 | MAP3K13  | 3  | 185080997                           | 1 | cg25264265                                  | 0.378890525 | 0.470843783 | 0.607942355 | 0.22905183   | 1.77E-09    | 4.05E-08    |
| EXON1 | MAP4K1   | 19 | 39108529/39108609                   | 2 | cg15679651/cg19457477                       | 0.508028538 | 0.601004919 | 0.668260009 | 0.160231472  | 8.43E-08    | 1.04E-06    |
| EXON1 | MAP9     | 4  | 156297942/156298050/156298002       | 3 | cg03616357/cg08015755/cg20334243            | 0.207608486 | 0.306153983 | 0.365018895 | 0.15741041   | 0.000411197 | 0.001869322 |
| EXON1 | MAS1     | 6  | 160328002                           | 1 | cg08784110                                  | 0.802870265 | 0.757641183 | 0.636234505 | -0.16663576  | 7.30E-06    | 5.13E-05    |
| EXON1 | MATK     | 19 | 3801548/3801727/3786246             | 3 | cg01388796/cg09416313/cg17429382            | 0.19456021  | 0.267437483 | 0.454817496 | 0.260257286  | 3.00E-07    | 3.10E-06    |
| EXON1 | MATN4    | 20 | 43936853                            | 1 | cg16667508                                  | 0.452680055 | 0.37490005  | 0.297240064 | -0.155439991 | 2.59E-09    | 5.50E-08    |
| EXON1 | MCHR2    | 6  | 100442105/100442002                 | 2 | cg06610484/cg26981309                       | 0.34170225  | 0.40551125  | 0.537922023 | 0.196219773  | 3.88E-09    | 7.79E-08    |
| EXON1 | MCM3AP   | 21 | 47704251/47705150                   | 2 | cg14211055/cg25737836                       | 0.56452808  | 0.483792667 | 0.408676113 | -0.155851967 | 3.24E-11    | 2.37E-09    |
| EXON1 | MDFI     | 6  | 41606317                            | 1 | cg01350077                                  | 0.134761777 | 0.262817074 | 0.459091135 | 0.324329358  | 1.36E-06    | 1.17E-05    |
| EXON1 | MEI1     | 22 | 42095536                            | 1 | cg11260046                                  | 0.40945288  | 0.503480361 | 0.618011595 | 0.208558715  | 5.50E-06    | 3.99E-05    |
| EXON1 | MEP1B    | 18 | 29770081                            | 1 | cg01941619                                  | 0.42988382  | 0.343256161 | 0.278936173 | -0.150947647 | 1.27E-09    | 3.11E-08    |
| EXON1 | MFRP     | 11 | 119217331                           | 1 | cg09186818                                  | 0.48301678  | 0.414818267 | 0.315081205 | -0.167935575 | 1.64E-09    | 3.80E-08    |
| EXON1 | MGC26647 | 7  | 88424985                            | 1 | cg19682786                                  | 0.787220455 | 0.720656683 | 0.610087027 | -0.177133428 | 4.98E-06    | 3.66E-05    |
| EXON1 | MGST1    | 12 | 16500077                            | 1 | cg27117982                                  | 0.44279536  | 0.335651328 | 0.265778864 | -0.177016496 | 2.16E-11    | 1.85E-09    |
| EXON1 | MIA2     | 14 | 39703302                            | 1 | cg24603941                                  | 0.64484315  | 0.5140377   | 0.41682725  | -0.2280159   | 8.05E-09    | 1.44E-07    |
| EXON1 | MLNR     | 13 | 49794681/49794635                   | 2 | cg02620013/cg10795666                       | 0.345723668 | 0.416838925 | 0.499742018 | 0.154018351  | 0.000137809 | 0.000705074 |
| EXON1 | MMD2     | 7  | 4998714/4998649                     | 2 | cg26468007/cg27603283                       | 0.263741423 | 0.340103578 | 0.49909633  | 0.235354907  | 3.27E-07    | 3.34E-06    |
| EXON1 | MMP12    | 11 | 102745682                           | 1 | cg20487452                                  | 0.61555095  | 0.455733928 | 0.3300052   | -0.28554575  | 3.77E-14    | 3.78E-11    |
| EXON1 | MMP16    | 8  | 89339609/89339404/89339473/89339622 | 4 | cg02889488/cg11536457/cg16852892/cg26756083 | 0.08758281  | 0.157189095 | 0.309519002 | 0.221936192  | 0.000488053 | 0.002181973 |
| EXON1 | MMP7     | 11 | 102401438                           | 1 | cg25511807                                  | 0.37490179  | 0.281074117 | 0.208489595 | -0.166412195 | 9.84E-11    | 4.75E-09    |

|       |         |    |                                                                       |   |                                                                              |             |             |             |              |             |             |
|-------|---------|----|-----------------------------------------------------------------------|---|------------------------------------------------------------------------------|-------------|-------------|-------------|--------------|-------------|-------------|
| EXON1 | MORN4   | 10 | 99393217/99393886                                                     | 2 | cg13196796/cg15711987                                                        | 0.50371698  | 0.393463672 | 0.305211082 | -0.198505898 | 1.67E-10    | 6.94E-09    |
| EXON1 | MOS     | 8  | 57025881/57025662/57026502/57026301                                   | 4 | cg10102762/cg15836635/cg22130262/cg22411207                                  | 0.268521659 | 0.375837887 | 0.489576789 | 0.221055129  | 6.58E-08    | 8.32E-07    |
| EXON1 | MOXD1   | 6  | 132722421/132722315                                                   | 2 | cg07570142/cg16478774                                                        | 0.101546219 | 0.17423656  | 0.388545952 | 0.286999733  | 1.10E-05    | 7.37E-05    |
| EXON1 | MRPS21  | 1  | 150266604/150266477/150266643/150266645/150266311/150266488/150266313 | 7 | cg02460371/cg08293086/cg09808343/cg15934674/cg18031008/cg23819679/cg26535484 | 0.197437178 | 0.26105832  | 0.399404685 | 0.201967507  | 7.03E-05    | 0.000386672 |
| EXON1 | MS4A10  | 11 | 60552841                                                              | 1 | cg07221454                                                                   | 0.608028155 | 0.520192817 | 0.453788941 | -0.154239214 | 3.14E-09    | 6.51E-08    |
| EXON1 | MS4A2   | 11 | 59856225                                                              | 1 | cg27533472                                                                   | 0.77252679  | 0.670307089 | 0.591417223 | -0.181109567 | 2.14E-09    | 4.73E-08    |
| EXON1 | MSC     | 8  | 72756155/72756341/72756656/72756058                                   | 4 | cg09734791/cg14409559/cg23710218/cg25832771                                  | 0.208250749 | 0.380812405 | 0.516248264 | 0.307997515  | 2.36E-07    | 2.52E-06    |
| EXON1 | MST1    | 3  | 49726151                                                              | 1 | cg17781925                                                                   | 0.560604335 | 0.465950656 | 0.407951073 | -0.152653262 | 3.60E-10    | 1.18E-08    |
| EXON1 | MST1R   | 3  | 49941151/49940853/49940126/49940919/49940245/49940353                 | 6 | cg03332271/cg08687163/cg11001085/cg11839681/cg18706476/cg23437479            | 0.735407847 | 0.547416054 | 0.432983918 | -0.302423929 | 4.29E-14    | 3.78E-11    |
| EXON1 | MUC7    | 4  | 71337873/71337726                                                     | 2 | cg06792975/cg10189763                                                        | 0.414972255 | 0.302408433 | 0.235466747 | -0.179505508 | 2.21E-09    | 4.86E-08    |
| EXON1 | MYH10   | 17 | 8534013                                                               | 1 | cg06011292                                                                   | 0.035441597 | 0.044081865 | 0.240930607 | 0.20548901   | 0.0007458   | 0.00318264  |
| EXON1 | MYL5    | 4  | 671791                                                                | 1 | cg17073306                                                                   | 0.415675175 | 0.343768378 | 0.262411736 | -0.153263439 | 7.29E-10    | 2.06E-08    |
| EXON1 | MYLK    | 3  | 123339334/123339417                                                   | 2 | cg20050484/cg20669834                                                        | 0.602496535 | 0.555005994 | 0.436432773 | -0.166063762 | 8.63E-10    | 2.34E-08    |
| EXON1 | MYOD1   | 11 | 17741925/17741243/17741687                                            | 3 | cg06425919/cg16519321/cg18555440                                             | 0.333780485 | 0.387984559 | 0.492567606 | 0.158787121  | 2.66E-08    | 3.93E-07    |
| EXON1 | MYOT    | 5  | 137203640                                                             | 1 | cg04956382                                                                   | 0.507573345 | 0.394165694 | 0.307983523 | -0.199589822 | 4.60E-11    | 2.99E-09    |
| EXON1 | NAALAD2 | 11 | 89867819/89867911/89867976                                            | 3 | cg05500015/cg14304817/cg21500966                                             | 0.22276217  | 0.293999184 | 0.387023888 | 0.164261718  | 0.00029068  | 0.001371888 |
| EXON1 | NCAM2   | 21 | 22370733/22370864/22370758                                            | 3 | cg15681537/cg17475987/cg25818292                                             | 0.158762917 | 0.227909182 | 0.326792251 | 0.168029334  | 1.17E-05    | 7.79E-05    |
| EXON1 | NCAN    | 19 | 19322818                                                              | 1 | cg08249988                                                                   | 0.38897671  | 0.513108794 | 0.684720918 | 0.295744208  | 2.42E-10    | 8.95E-09    |
| EXON1 | NDRG4   | 16 | 58498151/58498190/58498818                                            | 3 | cg00984694/cg04797985/cg26824423                                             | 0.114577602 | 0.178434689 | 0.265996681 | 0.15141908   | 0.000111015 | 0.000580024 |
| EXON1 | NELL1   | 11 | 20691161/20691180/20691126                                            | 3 | cg14689623/cg20113732/cg23861668                                             | 0.302093187 | 0.3874827   | 0.537339132 | 0.235245945  | 3.54E-07    | 3.56E-06    |

|       |         |    |                                              |   |                                                        |             |             |             |              |             |             |
|-------|---------|----|----------------------------------------------|---|--------------------------------------------------------|-------------|-------------|-------------|--------------|-------------|-------------|
| EXON1 | NETO1   | 18 | 70534767/70534534                            | 2 | cg184448581/cg26186727                                 | 0.328851298 | 0.397823596 | 0.482569505 | 0.153718207  | 3.56E-10    | 1.17E-08    |
| EXON1 | NEUROD1 | 2  | 182545209                                    | 1 | cg01897496                                             | 0.306702385 | 0.362163333 | 0.486254718 | 0.179552333  | 7.63E-05    | 0.000415852 |
| EXON1 | NEUROD2 | 17 | 37764153/37764158/37764118                   | 3 | cg03679521/cg11634198/cg18482164                       | 0.26187175  | 0.307161628 | 0.419439552 | 0.157567802  | 0.00017892  | 0.00089352  |
| EXON1 | NEUROD4 | 12 | 55413878/55413872                            | 2 | cg09014354/cg22047387                                  | 0.389255158 | 0.468533778 | 0.59492828  | 0.205673122  | 3.69E-08    | 5.13E-07    |
| EXON1 | NEUROD6 | 7  | 31380390                                     | 1 | cg26312920                                             | 0.380424165 | 0.292083483 | 0.224579068 | -0.155845097 | 5.07E-10    | 1.53E-08    |
| EXON1 | NEUROG3 | 10 | 71333037                                     | 1 | cg03425110                                             | 0.200846189 | 0.313128656 | 0.547800477 | 0.346954289  | 9.95E-10    | 2.58E-08    |
| EXON1 | NFAM1   | 22 | 42828386                                     | 1 | cg03365751                                             | 0.54159879  | 0.634140517 | 0.700656695 | 0.159057905  | 2.06E-09    | 4.56E-08    |
| EXON1 | NGB     | 14 | 77737621/77737495                            | 2 | cg02181639/cg02881570                                  | 0.375804095 | 0.441153767 | 0.623488245 | 0.24768415   | 3.50E-07    | 3.53E-06    |
| EXON1 | NIN     | 14 | 51290136/51290169                            | 2 | cg08189198/cg16449219                                  | 0.586387413 | 0.706010744 | 0.768622389 | 0.182234976  | 5.24E-12    | 6.87E-10    |
| EXON1 | NKAPL   | 6  | 28227482/28227392/28227220/28227127/28228206 | 5 | cg00448814/cg02578944/cg10055566/cg18675097/cg18900535 | 0.584734375 | 0.669008272 | 0.738908041 | 0.154173666  | 7.71E-10    | 2.15E-08    |
| EXON1 | NKX1-2  | 10 | 126138415                                    | 1 | cg13959280                                             | 0.240577635 | 0.255832856 | 0.40051425  | 0.159936615  | 0.000330041 | 0.001534124 |
| EXON1 | NKX2-2  | 20 | 21494084/21494547                            | 2 | cg16390060/cg17029168                                  | 0.29859384  | 0.403195008 | 0.56332042  | 0.26472658   | 5.55E-07    | 5.26E-06    |
| EXON1 | NLRP10  | 11 | 7984973                                      | 1 | cg18484189                                             | 0.561835355 | 0.489049094 | 0.394013105 | -0.16782225  | 5.84E-10    | 1.70E-08    |
| EXON1 | NOS1    | 12 | 117799370/117799447                          | 2 | cg03538436/cg21273407                                  | 0.17058017  | 0.235782614 | 0.323966108 | 0.153385938  | 2.59E-05    | 0.000158103 |
| EXON1 | NOS2    | 17 | 26127480/26127522/26127542/26127537/26127438 | 5 | cg02196147/cg06301529/cg07150830/cg07704981/cg26853415 | 0.531012951 | 0.422848119 | 0.331358986 | -0.199653965 | 1.43E-10    | 6.26E-09    |
| EXON1 | NPAS4   | 11 | 66188522/66188745                            | 2 | cg14699728/cg22134325                                  | 0.61101075  | 0.731231661 | 0.824678177 | 0.213667427  | 1.72E-11    | 1.62E-09    |
| EXON1 | NPBWR1  | 8  | 53853444/53852661/53853112                   | 3 | cg02640612/cg06528306/cg21001487                       | 0.391862003 | 0.454914864 | 0.620630359 | 0.228768357  | 9.58E-10    | 2.52E-08    |
| EXON1 | NPFFR2  | 4  | 72897565/72897782/72897868/72897698/72897613 | 5 | cg02192673/cg04008252/cg20289913/cg21266330/cg26656113 | 0.431398243 | 0.491396208 | 0.591193389 | 0.159795146  | 3.83E-06    | 2.91E-05    |
| EXON1 | NPHS1   | 19 | 36342859/36342725                            | 2 | cg04941018/cg19498228                                  | 0.620830105 | 0.515835708 | 0.425516268 | -0.195313837 | 2.46E-11    | 1.98E-09    |
| EXON1 | NPR3    | 5  | 32711881/32712237/32712623                   | 3 | cg01252672/cg05839235/cg17630392                       | 0.316180277 | 0.398280525 | 0.576090841 | 0.259910563  | 1.04E-08    | 1.78E-07    |
| EXON1 | NPY2R   | 4  | 156130206/156129862/156130016                | 3 | cg14586939/cg20271517/cg21512644                       | 0.28446994  | 0.395941781 | 0.500783826 | 0.216313885  | 3.69E-06    | 2.82E-05    |
| EXON1 | NR1I3   | 1  | 161207966                                    | 1 | cg25214346                                             | 0.591692035 | 0.452438228 | 0.339290932 | -0.252401103 | 3.65E-14    | 3.78E-11    |

|       |         |    |                                                                                           |   |                                                                                                    |             |             |             |              |             |             |
|-------|---------|----|-------------------------------------------------------------------------------------------|---|----------------------------------------------------------------------------------------------------|-------------|-------------|-------------|--------------|-------------|-------------|
| EXON1 | NR2E1   | 6  | 108487388/108487506/108487903/108487820                                                   | 4 | cg02062480/cg03383382/cg06559274/cg19697981                                                        | 0.240879177 | 0.25947047  | 0.396833913 | 0.155954736  | 2.00E-05    | 0.000126448 |
| EXON1 | NR2E3   | 15 | 72103133                                                                                  | 1 | cg05175964                                                                                         | 0.617447225 | 0.492032528 | 0.386912323 | -0.230534902 | 4.00E-12    | 6.05E-10    |
| EXON1 | NRG3    | 10 | 83635375/83635300                                                                         | 2 | cg02690638/cg04529370                                                                              | 0.346941915 | 0.431284142 | 0.572608784 | 0.225666869  | 1.21E-10    | 5.44E-09    |
| EXON1 | NRXN1   | 2  | 50574624/51259493/50574196/50574708/50574516/51259552                                     | 6 | cg05015185/cg08008931/cg14875171/cg17526573/cg22001533/cg27112565                                  | 0.290331083 | 0.367558091 | 0.473173299 | 0.182842216  | 2.53E-09    | 5.39E-08    |
| EXON1 | NT5C1A  | 1  | 40137636                                                                                  | 1 | cg23045719                                                                                         | 0.073181116 | 0.129791245 | 0.234315919 | 0.161134803  | 0.001024251 | 0.004232996 |
| EXON1 | NTRK3   | 15 | 88799523/88799526                                                                         | 2 | cg11525479/cg27034819                                                                              | 0.074820707 | 0.151314393 | 0.25776619  | 0.182945484  | 2.58E-07    | 2.72E-06    |
| EXON1 | NWD1    | 19 | 16830859                                                                                  | 1 | cg21035374                                                                                         | 0.46745219  | 0.38020425  | 0.290009155 | -0.177443035 | 6.02E-10    | 1.74E-08    |
| EXON1 | NXPB1   | 7  | 8473990                                                                                   | 1 | cg06444755                                                                                         | 0.347468845 | 0.403766956 | 0.508039186 | 0.160570341  | 7.06E-05    | 0.000388326 |
| EXON1 | ODF3    | 11 | 196824                                                                                    | 1 | cg04874875                                                                                         | 0.80516377  | 0.767069428 | 0.603839582 | -0.201324188 | 1.35E-05    | 8.87E-05    |
| EXON1 | ODZ4    | 11 | 79151611                                                                                  | 1 | cg06892009                                                                                         | 0.079381814 | 0.154169337 | 0.306221042 | 0.226839228  | 0.000206265 | 0.001013624 |
| EXON1 | OLFM4   | 13 | 53603157                                                                                  | 1 | cg24932628                                                                                         | 0.615176795 | 0.434478633 | 0.355098023 | -0.260078772 | 6.20E-10    | 1.78E-08    |
| EXON1 | OLIG2   | 21 | 34398263/34398265                                                                         | 2 | cg09793121/cg22869726                                                                              | 0.46519302  | 0.585147628 | 0.71594535  | 0.25075233   | 1.01E-10    | 4.78E-09    |
| EXON1 | OLIG3   | 6  | 137814728/137814078/137815333/137813878/137814356/137814960/137813584/137813648/137814971 | 9 | cg01972751/cg03602029/cg03889226/cg04508701/cg10071643/cg12744820/cg13560452/cg15980797/cg17295225 | 0.369407105 | 0.427597218 | 0.556984729 | 0.187577624  | 1.02E-06    | 9.08E-06    |
| EXON1 | ONECUT1 | 15 | 53081526/53081248                                                                         | 2 | cg14217069/cg17500265                                                                              | 0.36876441  | 0.425367464 | 0.599747198 | 0.230982788  | 5.58E-08    | 7.23E-07    |
| EXON1 | OPCML   | 11 | 133402230/132812991/133402184/133402246                                                   | 4 | cg03923934/cg09314708/cg19151121/cg19349861                                                        | 0.329729523 | 0.404297156 | 0.49141755  | 0.161688028  | 6.17E-06    | 4.43E-05    |
| EXON1 | OPRK1   | 8  | 54164161/54164051/54164081                                                                | 3 | cg07303244/cg11701471/cg25990647                                                                   | 0.33181452  | 0.425166318 | 0.593733085 | 0.261918565  | 2.12E-08    | 3.22E-07    |
| EXON1 | OR10A3  | 11 | 7960899                                                                                   | 1 | cg09140665                                                                                         | 0.49569433  | 0.408675017 | 0.333927714 | -0.161766616 | 1.28E-06    | 1.12E-05    |
| EXON1 | OR10A4  | 11 | 6898245                                                                                   | 1 | cg04456892                                                                                         | 0.686775465 | 0.612365856 | 0.51522325  | -0.171552215 | 2.23E-05    | 0.000139127 |
| EXON1 | OR10J3  | 1  | 159284298/159283536/159284082                                                             | 3 | cg13507224/cg19378892/cg23774016                                                                   | 0.671290432 | 0.554635069 | 0.448159027 | -0.223131404 | 1.35E-11    | 1.39E-09    |
| EXON1 | OR10P1  | 12 | 56031142                                                                                  | 1 | cg18770739                                                                                         | 0.601520555 | 0.4993668   | 0.407141841 | -0.194378714 | 6.81E-10    | 1.94E-08    |
| EXON1 | OR10T2  | 1  | 158369112/158368889                                                                       | 2 | cg15593510/cg15852352                                                                              | 0.678088725 | 0.501589039 | 0.350021123 | -0.328067602 | 4.23E-14    | 3.78E-11    |
| EXON1 | OR10Z1  | 1  | 158576809                                                                                 | 1 | cg20985269                                                                                         | 0.64585868  | 0.498914672 | 0.3964669   | -0.24939178  | 1.14E-12    | 2.88E-10    |



|       |        |    |                                     |   |                                             |             |             |             |              |             |             |
|-------|--------|----|-------------------------------------|---|---------------------------------------------|-------------|-------------|-------------|--------------|-------------|-------------|
| EXON1 | OR11H6 | 14 | 20692622                            | 1 | cg03008515                                  | 0.520105455 | 0.42227725  | 0.31043085  | -0.209674605 | 3.63E-07    | 3.63E-06    |
| EXON1 | OR13A1 | 10 | 45811038                            | 1 | cg05877590                                  | 0.74817376  | 0.714776239 | 0.584376964 | -0.163796796 | 5.40E-06    | 3.93E-05    |
| EXON1 | OR1A2  | 17 | 3100972                             | 1 | cg16678925                                  | 0.622805125 | 0.538005189 | 0.426941236 | -0.195863889 | 8.88E-09    | 1.56E-07    |
| EXON1 | OR1G1  | 17 | 3030185                             | 1 | cg27622610                                  | 0.53168163  | 0.454564772 | 0.36863775  | -0.16304388  | 5.89E-11    | 3.49E-09    |
| EXON1 | OR1J2  | 9  | 125273193                           | 1 | cg02644195                                  | 0.58050807  | 0.504360617 | 0.412877982 | -0.167630088 | 5.04E-11    | 3.15E-09    |
| EXON1 | OR1L3  | 9  | 125437568/125438219                 | 2 | cg01693284/cg13652536                       | 0.702679435 | 0.604558789 | 0.546706259 | -0.155973176 | 0.000182877 | 0.00091156  |
| EXON1 | OR2AK2 | 1  | 248129192                           | 1 | cg11977100                                  | 0.593765145 | 0.440189311 | 0.286650286 | -0.307114859 | 2.78E-13    | 1.14E-10    |
| EXON1 | OR2B6  | 6  | 27925166                            | 1 | cg03340878                                  | 0.684246695 | 0.597933917 | 0.519217023 | -0.165029672 | 0.000300251 | 0.001411021 |
| EXON1 | OR2D2  | 11 | 6913644                             | 1 | cg00243661                                  | 0.75473994  | 0.635957867 | 0.559619082 | -0.195120858 | 5.02E-06    | 3.68E-05    |
| EXON1 | OR2G3  | 1  | 247769804/247769251                 | 2 | cg03618016/cg15231462                       | 0.74263449  | 0.700470306 | 0.58910078  | -0.15353371  | 1.95E-05    | 0.000123903 |
| EXON1 | OR2H1  | 6  | 29426320                            | 1 | cg13680362                                  | 0.66452185  | 0.557526567 | 0.472516695 | -0.192005155 | 1.67E-05    | 0.000107941 |
| EXON1 | OR2M2  | 1  | 248343651/248343317                 | 2 | cg00073384/cg20812354                       | 0.72903652  | 0.647914311 | 0.5447131   | -0.18432342  | 1.51E-09    | 3.58E-08    |
| EXON1 | OR2M3  | 1  | 248366399/248366883                 | 2 | cg05353872/cg07598464                       | 0.687784385 | 0.588039617 | 0.455329084 | -0.232455301 | 1.56E-07    | 1.76E-06    |
| EXON1 | OR2M5  | 1  | 248308934/248308813                 | 2 | cg02332123/cg04283307                       | 0.652761025 | 0.561371367 | 0.460385391 | -0.192375634 | 3.19E-09    | 6.57E-08    |
| EXON1 | OR2T33 | 1  | 248436202                           | 1 | cg16126058                                  | 0.366782645 | 0.285497222 | 0.210676073 | -0.156106572 | 1.27E-11    | 1.32E-09    |
| EXON1 | OR2T4  | 1  | 248525007                           | 1 | cg07483650                                  | 0.366023425 | 0.278007917 | 0.196313532 | -0.169709893 | 9.88E-14    | 5.47E-11    |
| EXON1 | OR2T6  | 1  | 248551173/248551409                 | 2 | cg00883837/cg20465661                       | 0.63138572  | 0.5134356   | 0.385281855 | -0.246103865 | 1.87E-09    | 4.24E-08    |
| EXON1 | OR2W1  | 6  | 29012859/29012352/29012588/29012269 | 4 | cg01947943/cg02023215/cg07053841/cg12081389 | 0.747435905 | 0.669465578 | 0.556029711 | -0.191406194 | 5.17E-07    | 4.93E-06    |
| EXON1 | OR4C12 | 11 | 50003963                            | 1 | cg15905666                                  | 0.698601595 | 0.596263256 | 0.465559855 | -0.23304174  | 1.48E-05    | 9.71E-05    |
| EXON1 | OR4K17 | 14 | 20585753/20586367                   | 2 | cg04588710/cg10836431                       | 0.539907743 | 0.457262717 | 0.375232505 | -0.164675238 | 1.03E-07    | 1.23E-06    |
| EXON1 | OR51B4 | 11 | 5322976                             | 1 | cg06353345                                  | 0.64987143  | 0.514448006 | 0.319087886 | -0.330783544 | 8.21E-14    | 5.43E-11    |
| EXON1 | OR51B6 | 11 | 5372944                             | 1 | cg00423453                                  | 0.5330523   | 0.391589678 | 0.268986232 | -0.264066068 | 1.52E-14    | 3.38E-11    |
| EXON1 | OR51I1 | 11 | 5462540                             | 1 | cg04874562                                  | 0.553066405 | 0.445523361 | 0.34538165  | -0.207684755 | 1.36E-13    | 7.19E-11    |
| EXON1 | OR51L1 | 11 | 5020582                             | 1 | cg06866232                                  | 0.44972989  | 0.390325183 | 0.295179773 | -0.154550117 | 3.54E-08    | 4.97E-07    |
| EXON1 | OR52A4 | 11 | 5142602                             | 1 | cg02211735                                  | 0.45781345  | 0.343789278 | 0.226432155 | -0.231381295 | 3.32E-12    | 5.38E-10    |
| EXON1 | OR52B2 | 11 | 6191109/6191393                     | 2 | cg05005432/cg16309319                       | 0.726049495 | 0.662184994 | 0.564208095 | -0.1618414   | 9.90E-05    | 0.000523442 |
| EXON1 | OR52B6 | 11 | 5602123                             | 1 | cg00294684                                  | 0.77197956  | 0.691746872 | 0.553328591 | -0.218650969 | 6.37E-06    | 4.54E-05    |
| EXON1 | OR52D1 | 11 | 5510396/5510732                     | 2 | cg04956485/cg12860254                       | 0.84537203  | 0.797214739 | 0.663536245 | -0.181835785 | 5.97E-05    | 0.000334292 |
| EXON1 | OR52J3 | 11 | 5067927                             | 1 | cg17379345                                  | 0.74748444  | 0.630067617 | 0.547998545 | -0.199485895 | 2.91E-07    | 3.03E-06    |
| EXON1 | OR52N1 | 11 | 5809911                             | 1 | cg10440696                                  | 0.63821711  | 0.563754844 | 0.425155482 | -0.213061628 | 4.10E-06    | 3.08E-05    |
| EXON1 | OR52N2 | 11 | 5841688                             | 1 | cg05703009                                  | 0.611918655 | 0.5406584   | 0.422179595 | -0.18973906  | 1.20E-08    | 2.00E-07    |

|       |        |    |                            |   |                                  |             |             |             |              |             |             |
|-------|--------|----|----------------------------|---|----------------------------------|-------------|-------------|-------------|--------------|-------------|-------------|
| EXON1 | OR56A1 | 11 | 6048685/6047917            | 2 | cg01242426/cg12415917            | 0.706553545 | 0.62847565  | 0.521433182 | -0.185120363 | 7.66E-11    | 4.12E-09    |
| EXON1 | OR56B4 | 11 | 6129548/6129408            | 2 | cg10092198/cg25678587            | 0.547243855 | 0.436509525 | 0.312700455 | -0.2345434   | 2.12E-10    | 8.18E-09    |
| EXON1 | OR5AR1 | 11 | 56431525                   | 1 | cg14029856                       | 0.635247195 | 0.581912356 | 0.466349745 | -0.16889745  | 1.64E-05    | 0.000106077 |
| EXON1 | OR5AS1 | 11 | 55798206                   | 1 | cg14569837                       | 0.724193485 | 0.661185767 | 0.553617986 | -0.170575499 | 1.61E-05    | 0.000104769 |
| EXON1 | OR5H14 | 3  | 97868656                   | 1 | cg15154635                       | 0.638656275 | 0.574328578 | 0.477130614 | -0.161525661 | 2.18E-07    | 2.35E-06    |
| EXON1 | OR5H6  | 3  | 97983540/97983253          | 2 | cg05232914/cg20367065            | 0.777116725 | 0.671791272 | 0.590553909 | -0.186562816 | 5.01E-06    | 3.68E-05    |
| EXON1 | OR5L2  | 11 | 55594854                   | 1 | cg02459415                       | 0.67929876  | 0.598909694 | 0.455660786 | -0.223637974 | 3.58E-07    | 3.59E-06    |
| EXON1 | OR5T1  | 11 | 56043514                   | 1 | cg27149471                       | 0.704785315 | 0.61706415  | 0.498464873 | -0.206320442 | 3.91E-06    | 2.96E-05    |
| EXON1 | OR6C65 | 12 | 55794783                   | 1 | cg25236050                       | 0.674340085 | 0.570522283 | 0.42028155  | -0.254058535 | 1.44E-07    | 1.65E-06    |
| EXON1 | OR6K3  | 1  | 158687431                  | 1 | cg20268857                       | 0.71700447  | 0.638179611 | 0.530855236 | -0.186149234 | 1.84E-05    | 0.000117861 |
| EXON1 | OR6N1  | 1  | 158736112/158736312        | 2 | cg04972930/cg24381587            | 0.712903723 | 0.629850064 | 0.553657575 | -0.159246148 | 5.00E-13    | 1.74E-10    |
| EXON1 | OR7A17 | 19 | 14991752/14992047          | 2 | cg12506013/cg20792256            | 0.30965707  | 0.2240131   | 0.151004445 | -0.158652625 | 1.43E-13    | 7.27E-11    |
| EXON1 | OR8K3  | 11 | 56086656                   | 1 | cg27314580                       | 0.701372765 | 0.610796761 | 0.501831082 | -0.199541683 | 8.01E-07    | 7.29E-06    |
| EXON1 | OR8K5  | 11 | 55927697                   | 1 | cg11371231                       | 0.636005695 | 0.531065117 | 0.396211641 | -0.239794054 | 4.95E-09    | 9.58E-08    |
| EXON1 | OR8S1  | 12 | 48919444/48919471          | 2 | cg01881778/cg27104671            | 0.70300426  | 0.651432325 | 0.54836763  | -0.15463663  | 2.53E-05    | 0.00015525  |
| EXON1 | OR9K2  | 12 | 55524042                   | 1 | cg13860283                       | 0.445972335 | 0.366307611 | 0.292927618 | -0.153044717 | 2.97E-08    | 4.30E-07    |
| EXON1 | OR9Q1  | 11 | 57791564                   | 1 | cg03034198                       | 0.750499935 | 0.57641685  | 0.519473877 | -0.231026058 | 5.81E-10    | 1.70E-08    |
| EXON1 | OSMR   | 5  | 38846034/38846475/38846100 | 3 | cg02390103/cg05485663/cg17528648 | 0.291284015 | 0.350370437 | 0.449132152 | 0.157848137  | 4.27E-07    | 4.19E-06    |
| EXON1 | OTOL1  | 3  | 161214690/161214813        | 2 | cg01015123/cg13212525            | 0.556621783 | 0.409018661 | 0.325907804 | -0.230713979 | 7.41E-10    | 2.09E-08    |
| EXON1 | OTOS   | 2  | 241080057                  | 1 | cg19697911                       | 0.463261025 | 0.392938306 | 0.308255473 | -0.155005552 | 1.75E-10    | 7.11E-09    |
| EXON1 | OTP    | 5  | 76934461/76934501          | 2 | cg21097283/cg24231716            | 0.199478577 | 0.271493168 | 0.380937562 | 0.181458985  | 6.10E-07    | 5.71E-06    |
| EXON1 | P2RY12 | 3  | 151058527                  | 1 | cg03379681                       | 0.5499868   | 0.474373656 | 0.373792782 | -0.176194018 | 8.55E-06    | 5.93E-05    |
| EXON1 | PAK7   | 20 | 9819467                    | 1 | cg18034428                       | 0.34452928  | 0.323443256 | 0.515732564 | 0.171203284  | 3.84E-05    | 0.000224733 |
| EXON1 | PANX3  | 11 | 124481614                  | 1 | cg08191915                       | 0.683063245 | 0.60932475  | 0.476780723 | -0.206282522 | 3.72E-09    | 7.53E-08    |
| EXON1 | PAPPA2 | 1  | 176432498                  | 1 | cg10994126                       | 0.47482309  | 0.359825356 | 0.271975341 | -0.202847749 | 9.33E-12    | 1.07E-09    |
| EXON1 | PAQR5  | 15 | 69591355/69591357/69606770 | 3 | cg00225576/cg13117105/cg25963511 | 0.541098615 | 0.4359517   | 0.36547975  | -0.175618865 | 3.66E-09    | 7.41E-08    |
| EXON1 | PARVB  | 22 | 44420316                   | 1 | cg20991347                       | 0.128513228 | 0.199922744 | 0.374301399 | 0.245788171  | 8.35E-05    | 0.000450291 |
| EXON1 | PATE3  | 11 | 125658038                  | 1 | cg09752271                       | 0.421375365 | 0.327739161 | 0.242760424 | -0.178614941 | 6.08E-07    | 5.69E-06    |
| EXON1 | PAX7   | 1  | 18957632/18958084          | 2 | cg11428724/cg13969001            | 0.182770352 | 0.194844565 | 0.339914824 | 0.157144472  | 0.003890899 | 0.014009989 |

|       |          |    |                                                                                                                                                                 |    |                                                                                                                                                                                 |             |             |             |             |          |          |
|-------|----------|----|-----------------------------------------------------------------------------------------------------------------------------------------------------------------|----|---------------------------------------------------------------------------------------------------------------------------------------------------------------------------------|-------------|-------------|-------------|-------------|----------|----------|
| EXON1 | PCDH10   | 4  | 134073627/134071663/134072931/134072237/134070598/134070819/134072723/134074369                                                                                 | 8  | cg06667761/cg09221867/cg09693004/cg09960109/cg14410319/cg14795750/cg17504999/cg23713176                                                                                         | 0.325112394 | 0.421639558 | 0.558368096 | 0.233255702 | 4.12E-10 | 1.30E-08 |
| EXON1 | PCDH17   | 13 | 58206058/58208929/58208350/58207013/58209133/58207058/58206036/58207650/58207859                                                                                | 9  | cg00208153/cg04413320/cg07921625/cg11312408/cg12432236/cg14427009/cg14893163/cg22840780/cg26444528                                                                              | 0.443761173 | 0.551015106 | 0.674702436 | 0.230941263 | 1.82E-10 | 7.25E-09 |
| EXON1 | PCDHGA11 | 5  | 140802831/14080130/140802804/140800586/140800929/140802135/140800983/140800629/140801801286/140801354/140802669/140801482/140800761/140802432                   | 14 | cg01729977/cg02715006/cg04845915/cg05870739/cg06572465/cg07179872/cg08395122/cg10679597/cg13598256/cg13718539/cg21928406/cg22175873/cg24954895/cg26485937                       | 0.50997514  | 0.610009547 | 0.70583027  | 0.195855129 | 4.39E-10 | 1.36E-08 |
| EXON1 | PCDHGA12 | 5  | 140811520/140810404/140811253/140811642/140811312/140810260/140810920/140812464/140810161/140810726/140812558/140810433/140810805/140811102/140810562/140812236 | 16 | cg01224715/cg02267483/cg04080041/cg07489502/cg07539798/cg07802710/cg09639151/cg10805220/cg11647681/cg14253517/cg19294953/cg21185686/cg22151446/cg23244790/cg24576050/cg26375473 | 0.52913674  | 0.625404835 | 0.713070255 | 0.183933515 | 1.02E-09 | 2.62E-08 |
| EXON1 | PCDHGB7  | 5  | 140798095/140798758/140799811/140798188/140798161/140797509/140799290/140799572/140797521/140798971/140797286/140799305                                         | 12 | cg02331883/cg02707176/cg03456338/cg04503600/cg08935238/cg08938584/cg13951490/cg15874877/cg17011276/cg18297751/cg23563234/cg27630202                                             | 0.590398071 | 0.660112676 | 0.744720048 | 0.154321977 | 1.58E-09 | 3.70E-08 |

|       |         |    |                                                                                                                                            |    |                                                                                                                                                           |             |             |             |              |             |             |
|-------|---------|----|--------------------------------------------------------------------------------------------------------------------------------------------|----|-----------------------------------------------------------------------------------------------------------------------------------------------------------|-------------|-------------|-------------|--------------|-------------|-------------|
| EXON1 | PCDHGC3 | 5  | 140857995/140856330/140856469/140855857/140857813/140857474/14085582/140857192/140857941/140857889/140858046/140856971/140857647/140858107 | 14 | cg00589850/cg04453180/cg07445963/cg07448606/cg08155325/cg09581226/cg10858746/cg12877039/cg14672084/cg18858331/cg24024424/cg24942747/cg25600472/cg27639030 | 0.39986379  | 0.488760097 | 0.62326545  | 0.223401661  | 1.10E-10    | 5.12E-09    |
| EXON1 | PCDHGC4 | 5  | 140865433/140864834                                                                                                                        | 2  | cg11830096/cg12145907                                                                                                                                     | 0.590769333 | 0.696767328 | 0.800635389 | 0.209866056  | 2.79E-13    | 1.14E-10    |
| EXON1 | PCK1    | 20 | 56136167                                                                                                                                   | 1  | cg20605413                                                                                                                                                | 0.399125295 | 0.314853322 | 0.242899114 | -0.156226181 | 2.25E-10    | 8.47E-09    |
| EXON1 | PCOLCE  | 7  | 100200009/10019982/100199952/100200003                                                                                                     | 4  | cg02797569/cg06402330/cg26777475/cg27069566                                                                                                               | 0.633549886 | 0.575186529 | 0.459504847 | -0.17404504  | 1.90E-08    | 2.92E-07    |
| EXON1 | PCP4L1  | 1  | 161228674                                                                                                                                  | 1  | cg11912330                                                                                                                                                | 0.16781842  | 0.160256398 | 0.392305085 | 0.224486665  | 0.000207649 | 0.001019291 |
| EXON1 | PDE1B   | 12 | 54955143/54943545/54943484                                                                                                                 | 3  | cg01961252/cg15927682/cg24020814                                                                                                                          | 0.248393013 | 0.331568553 | 0.422807558 | 0.174414545  | 8.91E-06    | 6.15E-05    |
| EXON1 | PDE8B   | 5  | 76506759/76507050                                                                                                                          | 2  | cg08311610/cg18089852                                                                                                                                     | 0.204729229 | 0.324509538 | 0.441491449 | 0.23676222   | 5.09E-07    | 4.88E-06    |
| EXON1 | PDGFD   | 11 | 104034754/104034619/104034982                                                                                                              | 3  | cg02120582/cg07748540/cg18403606                                                                                                                          | 0.067299898 | 0.215763276 | 0.412432378 | 0.34513248   | 2.09E-07    | 2.26E-06    |
| EXON1 | PDPN    | 1  | 13912116/13910555/13910569                                                                                                                 | 3  | cg17826518/cg18877506/cg21819468                                                                                                                          | 0.398049335 | 0.512292985 | 0.623260467 | 0.225211132  | 9.24E-08    | 1.12E-06    |
| EXON1 | PDZRN4  | 12 | 41831558/41582362/41582349                                                                                                                 | 3  | cg15417244/cg16896079/cg21926708                                                                                                                          | 0.448558728 | 0.532102548 | 0.641976517 | 0.193417788  | 3.43E-14    | 3.78E-11    |
| EXON1 | PENK    | 8  | 57358505/57359200/57359258/57358590                                                                                                        | 4  | cg04598121/cg06066137/cg10397440/cg21694941                                                                                                               | 0.409083774 | 0.481465306 | 0.587195616 | 0.178111842  | 1.54E-11    | 1.50E-09    |
| EXON1 | PEX5L   | 3  | 179754483                                                                                                                                  | 1  | cg03175305                                                                                                                                                | 0.176515565 | 0.282426469 | 0.423390118 | 0.246874553  | 1.27E-07    | 1.47E-06    |
| EXON1 | PHOX2A  | 11 | 71955113/71954982/71955164                                                                                                                 | 3  | cg13103303/cg18722841/cg19651694                                                                                                                          | 0.354161368 | 0.423400856 | 0.581726418 | 0.227565051  | 8.43E-10    | 2.32E-08    |
| EXON1 | PIK3R6  | 17 | 8770954/8770908                                                                                                                            | 2  | cg09209669/cg24092340                                                                                                                                     | 0.394042978 | 0.273141422 | 0.181220932 | -0.212822046 | 8.93E-11    | 4.49E-09    |
| EXON1 | PIWIL3  | 22 | 25170371                                                                                                                                   | 1  | cg07971797                                                                                                                                                | 0.833815295 | 0.796256428 | 0.667576014 | -0.166239281 | 0.000207121 | 0.001017456 |
| EXON1 | PKD2L2  | 5  | 137225191                                                                                                                                  | 1  | cg21051519                                                                                                                                                | 0.33712707  | 0.471419183 | 0.552794859 | 0.215667789  | 8.53E-07    | 7.70E-06    |
| EXON1 | PKIA    | 8  | 79428444/79428569/79428434                                                                                                                 | 3  | cg09043127/cg12330330/cg27140220                                                                                                                          | 0.062668109 | 0.138695383 | 0.293404026 | 0.230735917  | 4.75E-05    | 0.00027216  |
| EXON1 | PLA2G4F | 15 | 42448786/42448760                                                                                                                          | 2  | cg10917153/cg16920001                                                                                                                                     | 0.482703    | 0.393574192 | 0.321426993 | -0.161276007 | 7.69E-11    | 4.12E-09    |

|       |          |    |                                                                                                                         |    |                                                                                                                                     |             |             |             |              |             |             |
|-------|----------|----|-------------------------------------------------------------------------------------------------------------------------|----|-------------------------------------------------------------------------------------------------------------------------------------|-------------|-------------|-------------|--------------|-------------|-------------|
| EXON1 | PLCZ1    | 12 | 18890872                                                                                                                | 1  | cg06233731                                                                                                                          | 0.659154945 | 0.580735178 | 0.465161123 | -0.193993822 | 2.34E-07    | 2.50E-06    |
| EXON1 | PLSCR5   | 3  | 146323078                                                                                                               | 1  | cg22594071                                                                                                                          | 0.469473455 | 0.390588256 | 0.302888591 | -0.166584864 | 9.13E-10    | 2.45E-08    |
| EXON1 | POSTN    | 13 | 38172803/38172876                                                                                                       | 2  | cg04922971/cg24719107                                                                                                               | 0.499432845 | 0.395833544 | 0.289274882 | -0.210157963 | 1.49E-08    | 2.39E-07    |
| EXON1 | POU3F1   | 1  | 38512238/38509934/38510933/38512250/38510074/38511455/38511677/38512230/38511105/38510522/38510383/38510182             | 12 | cg05336094/cg05785481/cg08599259/cg12714180/cg13149116/cg13193455/cg18451114/cg18755829/cg19769760/cg22821908/cg25488697/cg25609528 | 0.173647221 | 0.263071241 | 0.398562127 | 0.224914906  | 3.56E-09    | 7.24E-08    |
| EXON1 | POU4F2   | 4  | 147560282/147560286/147560126                                                                                           | 3  | cg02610222/cg14631165/cg24199834                                                                                                    | 0.322328865 | 0.391729356 | 0.513645348 | 0.191316483  | 1.32E-10    | 5.85E-09    |
| EXON1 | POU4F3   | 5  | 145718669/145718597                                                                                                     | 2  | cg17871749/cg23303408                                                                                                               | 0.331677935 | 0.393681303 | 0.499733048 | 0.168055113  | 1.26E-06    | 1.10E-05    |
| EXON1 | PPAPDC1A | 10 | 122216848                                                                                                               | 1  | cg17087331                                                                                                                          | 0.225069555 | 0.180014741 | 0.390885319 | 0.165815764  | 0.002345204 | 0.0088896   |
| EXON1 | PPFIA4   | 1  | 203020566/203020617/203020660                                                                                           | 3  | cg00594917/cg10952234/cg24000087                                                                                                    | 0.729849245 | 0.657511617 | 0.57815983  | -0.151689415 | 1.56E-06    | 1.31E-05    |
| EXON1 | PPP1R14D | 15 | 41120711                                                                                                                | 1  | cg04968426                                                                                                                          | 0.49174356  | 0.384359917 | 0.314411773 | -0.177331787 | 7.07E-11    | 3.93E-09    |
| EXON1 | PPP1R16B | 20 | 37434409                                                                                                                | 1  | cg22128431                                                                                                                          | 0.071897924 | 0.171597465 | 0.302441241 | 0.230543317  | 0.000224216 | 0.0010913   |
| EXON1 | PPP1R3A  | 7  | 113558794                                                                                                               | 1  | cg00967316                                                                                                                          | 0.771687275 | 0.687066378 | 0.567661268 | -0.204026007 | 8.43E-07    | 7.63E-06    |
| EXON1 | PPP2R2B  | 5  | 146460987/146257653/146258034/146258354/146258189/146258181/146258195/146258237/146258159/146435656/146257862/146258427 | 12 | cg01112778/cg03225002/cg03693911/cg03851984/cg04583285/cg08774231/cg09528265/cg11826826/cg14693112/cg16617774/cg21938261/cg25149751 | 0.220000274 | 0.269256711 | 0.382457051 | 0.162456777  | 4.17E-05    | 0.000242344 |
| EXON1 | PPP2R2C  | 4  | 6473964                                                                                                                 | 1  | cg18013519                                                                                                                          | 0.07588347  | 0.151003771 | 0.353179632 | 0.277296162  | 4.14E-06    | 3.10E-05    |
| EXON1 | PPYR1    | 10 | 47083632                                                                                                                | 1  | cg06939941                                                                                                                          | 0.568657925 | 0.670370039 | 0.744070564 | 0.175412639  | 2.16E-12    | 4.14E-10    |
| EXON1 | PRAMEF12 | 1  | 12835245                                                                                                                | 1  | cg13394110                                                                                                                          | 0.711959785 | 0.618704606 | 0.525610973 | -0.186348812 | 1.98E-05    | 0.000125078 |
| EXON1 | PRAMEF21 | 1  | 13522252                                                                                                                | 1  | cg11999044                                                                                                                          | 0.514005275 | 0.420667506 | 0.3360326   | -0.177972675 | 1.85E-11    | 1.71E-09    |
| EXON1 | PRDM11   | 11 | 45115584                                                                                                                | 1  | cg03470671                                                                                                                          | 0.812032445 | 0.748265267 | 0.606485836 | -0.205546609 | 3.24E-06    | 2.51E-05    |
| EXON1 | PRDM12   | 9  | 133540108                                                                                                               | 1  | cg09191327                                                                                                                          | 0.17442775  | 0.232800424 | 0.383041491 | 0.208613741  | 0.000100592 | 0.000531018 |
| EXON1 | PRELP    | 1  | 203444945                                                                                                               | 1  | cg07947930                                                                                                                          | 0.451737085 | 0.389516283 | 0.297888855 | -0.15384823  | 3.47E-08    | 4.90E-07    |
| EXON1 | PREX1    | 20 | 47444241                                                                                                                | 1  | cg03361585                                                                                                                          | 0.100361965 | 0.269619792 | 0.393830719 | 0.293468755  | 6.94E-08    | 8.72E-07    |

|       |           |    |                                                             |   |                                                                   |             |             |             |              |             |             |
|-------|-----------|----|-------------------------------------------------------------|---|-------------------------------------------------------------------|-------------|-------------|-------------|--------------|-------------|-------------|
| EXON1 | PREX2     | 8  | 68864769                                                    | 1 | cg06617456                                                        | 0.31326061  | 0.437296561 | 0.573209405 | 0.259948795  | 1.38E-10    | 6.07E-09    |
| EXON1 | PRG4      | 1  | 186265423                                                   | 1 | cg24669741                                                        | 0.49889375  | 0.420284861 | 0.317732418 | -0.181161332 | 2.71E-10    | 9.76E-09    |
| EXON1 | PRLHR     | 10 | 120355139                                                   | 1 | cg16196812                                                        | 0.49566566  | 0.589193594 | 0.70521705  | 0.20955139   | 2.07E-11    | 1.82E-09    |
| EXON1 | PRMT8     | 12 | 3600764/3600666                                             | 2 | cg11596580/cg23739862                                             | 0.27294165  | 0.299425    | 0.423234441 | 0.150292791  | 4.65E-05    | 0.000267107 |
| EXON1 | PRND      | 20 | 4702581                                                     | 1 | cg09906458                                                        | 0.66278959  | 0.504456711 | 0.349004655 | -0.313784935 | 1.68E-14    | 3.38E-11    |
| EXON1 | PROCA1    | 17 | 27038861/27038664/27038686                                  | 3 | cg02685896/cg19462352/cg24841318                                  | 0.13259097  | 0.230131542 | 0.326429853 | 0.193838883  | 1.43E-06    | 1.22E-05    |
| EXON1 | PRODH2    | 19 | 36304079                                                    | 1 | cg18640606                                                        | 0.73577225  | 0.673229444 | 0.501053945 | -0.234718305 | 1.72E-07    | 1.91E-06    |
| EXON1 | PROM2     | 2  | 95940475                                                    | 1 | cg25241038                                                        | 0.64004414  | 0.558917589 | 0.486534114 | -0.153510026 | 1.76E-08    | 2.73E-07    |
| EXON1 | PRR4      | 12 | 11324142/11002071/11324180                                  | 3 | cg21216543/cg23272369/cg26983578                                  | 0.813557555 | 0.652031544 | 0.578963895 | -0.23459366  | 2.60E-08    | 3.84E-07    |
| EXON1 | PRSS27    | 16 | 2770211/2770429/2770336/2770298                             | 4 | cg01195196/cg05144884/cg12391048/cg16444062                       | 0.74622224  | 0.619735257 | 0.552289117 | -0.193933123 | 2.05E-07    | 2.23E-06    |
| EXON1 | PTGFR     | 1  | 78956905/78956845/78956847                                  | 3 | cg03495868/cg03949391/cg27046936                                  | 0.393904195 | 0.462070296 | 0.596562179 | 0.202657984  | 2.50E-11    | 1.98E-09    |
| EXON1 | PTH2R     | 2  | 209271661/209271785                                         | 2 | cg06391199/cg24769821                                             | 0.27094058  | 0.304544699 | 0.461541468 | 0.190600888  | 0.000465446 | 0.002092078 |
| EXON1 | PTPN5     | 11 | 18813191                                                    | 1 | cg11334818                                                        | 0.316661295 | 0.431670789 | 0.507937245 | 0.19127595   | 0.000132911 | 0.000682691 |
| EXON1 | PTPRT     | 20 | 41818358/41818356                                           | 2 | cg03403065/cg13168820                                             | 0.191056606 | 0.262741759 | 0.392869729 | 0.201813123  | 3.16E-09    | 6.53E-08    |
| EXON1 | PVRL4     | 1  | 161059267/161059327                                         | 2 | cg10841756/cg22585988                                             | 0.561919435 | 0.461592733 | 0.371334232 | -0.190585203 | 8.87E-11    | 4.48E-09    |
| EXON1 | PXDN      | 2  | 1748112/1748132                                             | 2 | cg12164282/cg25181651                                             | 0.332990048 | 0.383183358 | 0.483251011 | 0.150260964  | 0.000612782 | 0.002671881 |
| EXON1 | PYDC1     | 16 | 31228299/31228202/31228263                                  | 3 | cg08346922/cg10038009/cg13352836                                  | 0.350772645 | 0.447509511 | 0.65483555  | 0.304062905  | 2.23E-10    | 8.45E-09    |
| EXON1 | PYDC2     | 3  | 191179074                                                   | 1 | cg16739580                                                        | 0.702488185 | 0.609279044 | 0.5201291   | -0.182359085 | 3.11E-05    | 0.000186192 |
| EXON1 | PYGO1     | 15 | 55881044                                                    | 1 | cg25902187                                                        | 0.173664853 | 0.357517393 | 0.522236799 | 0.348571946  | 5.07E-06    | 3.72E-05    |
| EXON1 | PZP       | 12 | 9360854/9360933                                             | 2 | cg01714932/cg10479063                                             | 0.698024228 | 0.623041672 | 0.517973932 | -0.180050296 | 2.63E-09    | 5.58E-08    |
| EXON1 | QKI       | 6  | 163836348/163836245                                         | 2 | cg06844545/cg09339301                                             | 0.174056859 | 0.207228581 | 0.360244865 | 0.186188007  | 0.000154318 | 0.000781275 |
| EXON1 | QRFPR     | 4  | 122302007/122301724/122301573/122301996/122301816/122301740 | 6 | cg00015770/cg06991300/cg10114327/cg14012124/cg16326674/cg19971716 | 0.307967968 | 0.396433607 | 0.5574158   | 0.249447832  | 2.25E-08    | 3.40E-07    |
| EXON1 | RAB11FIP4 | 17 | 29719023                                                    | 1 | cg12419135                                                        | 0.41374687  | 0.474749556 | 0.604057318 | 0.190310448  | 0.00017538  | 0.000877164 |
| EXON1 | RAB17     | 2  | 238499464                                                   | 1 | cg01157280                                                        | 0.594524595 | 0.492280311 | 0.398829073 | -0.195695522 | 3.57E-10    | 1.17E-08    |
| EXON1 | RAB25     | 1  | 156031182                                                   | 1 | cg19580810                                                        | 0.566289525 | 0.4548067   | 0.357817941 | -0.208471584 | 2.48E-10    | 9.08E-09    |

|       |         |    |                                                                                         |   |                                                                                                         |             |             |             |              |             |             |
|-------|---------|----|-----------------------------------------------------------------------------------------|---|---------------------------------------------------------------------------------------------------------|-------------|-------------|-------------|--------------|-------------|-------------|
| EXON1 | RAB34   | 17 | 27044745/2704517<br>6/27044322/270446<br>85/27044629/27045<br>164                       | 6 | cg02530437/cg08032<br>476/cg12873610/cg1<br>8686527/cg21816330<br>/cg22803868                           | 0.489640619 | 0.592465949 | 0.690550013 | 0.200909394  | 2.26E-11    | 1.91E-09    |
| EXON1 | RALYL   | 8  | 85096037/8509549<br>8/85097246/850971<br>57/85096015/85095<br>654/85097195/8509<br>5697 | 8 | cg00034076/cg05716<br>166/cg17215863/cg1<br>8016194/cg22403811<br>/cg23777958/cg2575<br>7598/cg26669044 | 0.368062837 | 0.414865296 | 0.604808588 | 0.236745751  | 1.61E-08    | 2.54E-07    |
| EXON1 | RAMP3   | 7  | 45197441                                                                                | 1 | cg14999001                                                                                              | 0.24034283  | 0.418481828 | 0.540330959 | 0.299988129  | 4.36E-08    | 5.86E-07    |
| EXON1 | RAPSN   | 11 | 47470633/4747067<br>4                                                                   | 2 | cg01947936/cg15679<br>098                                                                               | 0.77149761  | 0.72687405  | 0.617255845 | -0.154241765 | 1.52E-05    | 9.93E-05    |
| EXON1 | RASGRF1 | 15 | 79382995/7938270<br>8/79382767/793829<br>98/79382807/79383<br>167/79297210/7929<br>7159 | 8 | cg14510404/cg14984<br>684/cg16154416/cg1<br>7507573/cg20574415<br>/cg20973720/cg2184<br>0434/cg24739098 | 0.287670839 | 0.384281087 | 0.493672307 | 0.206001468  | 5.23E-08    | 6.82E-07    |
| EXON1 | RAX     | 18 | 56940418/5694046<br>3/56940333                                                          | 3 | cg00397673/cg05945<br>059/cg06676637                                                                    | 0.473504282 | 0.529920683 | 0.633184589 | 0.159680308  | 3.04E-10    | 1.06E-08    |
| EXON1 | RCN3    | 19 | 50031246/5003127<br>3/50031017                                                          | 3 | cg19403104/cg19808<br>978/cg21941030                                                                    | 0.566667185 | 0.676641842 | 0.742609445 | 0.17594226   | 4.17E-10    | 1.32E-08    |
| EXON1 | RCSD1   | 1  | 167599527/167599<br>631                                                                 | 2 | cg00450304/cg02079<br>933                                                                               | 0.026154343 | 0.066027011 | 0.212225592 | 0.186071249  | 0.00069075  | 0.00297129  |
| EXON1 | RDH5    | 12 | 56114155/5611426<br>9                                                                   | 2 | cg02192520/cg17243<br>643                                                                               | 0.52343967  | 0.430334986 | 0.336311564 | -0.187128106 | 9.38E-10    | 2.49E-08    |
| EXON1 | REG4    | 1  | 120354159                                                                               | 1 | cg00808492                                                                                              | 0.575735325 | 0.437262439 | 0.328892459 | -0.246842866 | 3.19E-11    | 2.36E-09    |
| EXON1 | RELN    | 7  | 103629618                                                                               | 1 | cg17923358                                                                                              | 0.267672155 | 0.337602217 | 0.448984718 | 0.181312563  | 0.000404414 | 0.001843556 |
| EXON1 | REM1    | 20 | 30063129                                                                                | 1 | cg12153542                                                                                              | 0.22427104  | 0.335859228 | 0.380584059 | 0.156313019  | 0.000516776 | 0.002294872 |
| EXON1 | REP15   | 12 | 27849452                                                                                | 1 | cg07809176                                                                                              | 0.483809695 | 0.390924644 | 0.323047568 | -0.160762127 | 3.58E-08    | 5.02E-07    |
| EXON1 | RERG    | 12 | 15374175/1537430<br>3                                                                   | 2 | cg08830758/cg24979<br>348                                                                               | 0.067929305 | 0.09755375  | 0.263818665 | 0.19588936   | 0.000792502 | 0.003363494 |
| EXON1 | RGS12   | 4  | 3371928/3371876/3<br>315925                                                             | 3 | cg09921821/cg19974<br>227/cg24466927                                                                    | 0.477248238 | 0.549716931 | 0.656136598 | 0.17888836   | 2.03E-09    | 4.54E-08    |
| EXON1 | RGS7BP  | 5  | 63802593/6380249<br>1                                                                   | 2 | cg00750523/cg18388<br>380                                                                               | 0.187152259 | 0.331437807 | 0.507750723 | 0.320598464  | 4.37E-06    | 3.26E-05    |
| EXON1 | RHAG    | 6  | 49604442                                                                                | 1 | cg23172892                                                                                              | 0.525934335 | 0.397075233 | 0.287293968 | -0.238640367 | 3.58E-11    | 2.52E-09    |
| EXON1 | RIC3    | 11 | 8190448/8190565/8<br>190572                                                             | 3 | cg03707776/cg08383<br>315/cg25778535                                                                    | 0.292124702 | 0.424474943 | 0.539278052 | 0.24715335   | 8.79E-11    | 4.46E-09    |
| EXON1 | RICS    | 11 | 128893940/128893<br>851                                                                 | 2 | cg03231860/cg20892<br>287                                                                               | 0.463703378 | 0.359730039 | 0.284669923 | -0.179033455 | 3.32E-11    | 2.38E-09    |
| EXON1 | RLBP1   | 15 | 89764836/8976489<br>5                                                                   | 2 | cg10173075/cg15808<br>008                                                                               | 0.640042538 | 0.455113978 | 0.3678254   | -0.272217138 | 2.52E-13    | 1.11E-10    |

|       |         |    |                                                                         |   |                                                                                         |             |             |             |              |             |             |
|-------|---------|----|-------------------------------------------------------------------------|---|-----------------------------------------------------------------------------------------|-------------|-------------|-------------|--------------|-------------|-------------|
| EXON1 | RNF150  | 4  | 142053720/142054417/142053623/142054329/142054254/142054446/142053970   | 7 | cg03112087/cg03563667/cg05212802/cg06340552/cg18120376/cg20599022/cg24053721            | 0.180049123 | 0.266463777 | 0.399462806 | 0.219413683  | 1.66E-05    | 0.000107451 |
| EXON1 | RNF175  | 4  | 154681066/154681197/154681323/154681128                                 | 4 | cg01440841/cg02647878/cg08660876/cg18355902                                             | 0.295499914 | 0.337412067 | 0.46049854  | 0.164998626  | 0.000599655 | 0.002618099 |
| EXON1 | RNF186  | 1  | 20141662/20140828                                                       | 2 | cg04994456/cg25096740                                                                   | 0.54771735  | 0.454155589 | 0.395728416 | -0.151988934 | 1.23E-09    | 3.05E-08    |
| EXON1 | RNF222  | 17 | 8301118                                                                 | 1 | cg12920094                                                                              | 0.67082034  | 0.573779922 | 0.461031095 | -0.209789245 | 1.45E-12    | 3.13E-10    |
| EXON1 | RNF43   | 17 | 56494554                                                                | 1 | cg24835159                                                                              | 0.492136535 | 0.405239378 | 0.324541164 | -0.167595371 | 2.54E-09    | 5.41E-08    |
| EXON1 | RORB    | 9  | 77112326/77112896                                                       | 2 | cg07536920/cg14170313                                                                   | 0.128788008 | 0.182273709 | 0.344570812 | 0.215782804  | 2.67E-05    | 0.00016268  |
| EXON1 | RSPO2   | 8  | 109095568/109095572/109095782                                           | 3 | cg00910695/cg04050867/cg14733048                                                        | 0.274932993 | 0.351034819 | 0.527101124 | 0.252168131  | 1.80E-09    | 4.10E-08    |
| EXON1 | RSPO3   | 6  | 127440413/127440104                                                     | 2 | cg07279933/cg09979256                                                                   | 0.117421047 | 0.22518447  | 0.402175854 | 0.284754807  | 6.38E-06    | 4.55E-05    |
| EXON1 | RSPO4   | 20 | 982831/982768                                                           | 2 | cg01188592/cg22709307                                                                   | 0.303446555 | 0.340147172 | 0.454667214 | 0.151220659  | 0.000408172 | 0.001857484 |
| EXON1 | RXFP3   | 5  | 33937182/33936752/33936520/33936597/33938213/33938225/33937673/33937876 | 8 | cg02305687/cg02341815/cg02640041/cg03909500/cg05574272/cg07917609/cg10350492/cg18294646 | 0.471641434 | 0.542159039 | 0.633953488 | 0.162312054  | 1.07E-08    | 1.83E-07    |
| EXON1 | RXFP4   | 1  | 155912569                                                               | 1 | cg27187375                                                                              | 0.610697645 | 0.504840306 | 0.414932432 | -0.195765213 | 2.16E-10    | 8.26E-09    |
| EXON1 | RXRG    | 1  | 165414189/165414332/165414379                                           | 3 | cg00349776/cg08905496/cg10364513                                                        | 0.201971838 | 0.243573256 | 0.353013446 | 0.151041608  | 0.001049961 | 0.004324387 |
| EXON1 | RYR1    | 19 | 38924347/38924349/38924436                                              | 3 | cg04571321/cg05471297/cg06740600                                                        | 0.19628607  | 0.287594851 | 0.464376086 | 0.268090016  | 1.11E-05    | 7.46E-05    |
| EXON1 | S100A14 | 1  | 153588782                                                               | 1 | cg25433648                                                                              | 0.517648555 | 0.412206472 | 0.3245839   | -0.193064655 | 9.46E-11    | 4.69E-09    |
| EXON1 | S100P   | 4  | 6695698/6695614                                                         | 2 | cg22266967/cg26233331                                                                   | 0.51050012  | 0.402098875 | 0.304532536 | -0.205967584 | 1.48E-12    | 3.13E-10    |
| EXON1 | S1PR1   | 1  | 101702519/101702602                                                     | 2 | cg04156369/cg18323466                                                                   | 0.103536975 | 0.214787156 | 0.40288088  | 0.299343905  | 7.74E-05    | 0.000420982 |
| EXON1 | SAA4    | 11 | 18258323                                                                | 1 | cg22587758                                                                              | 0.639549715 | 0.497548717 | 0.374011736 | -0.265537979 | 8.87E-10    | 2.39E-08    |
| EXON1 | SALL1   | 16 | 51184392/51185147/51184355/51184379/51185132/51185082/51185110          | 7 | cg00582524/cg01146232/cg04550052/cg04698114/cg06232807/cg06653699/cg09016242            | 0.465916713 | 0.597657404 | 0.716352588 | 0.250435875  | 1.43E-09    | 3.43E-08    |



|       |          |    |                                                                |   |                                                                              |             |             |             |              |             |             |
|-------|----------|----|----------------------------------------------------------------|---|------------------------------------------------------------------------------|-------------|-------------|-------------|--------------|-------------|-------------|
| EXON1 | SARM1    | 17 | 26699187/26699169/26699485                                     | 3 | cg05854644/cg15760257/cg20686234                                             | 0.13072045  | 0.295548424 | 0.409477434 | 0.278756984  | 2.12E-06    | 1.72E-05    |
| EXON1 | SCGB1D1  | 11 | 61957732/61957788                                              | 2 | cg07532354/cg13916742                                                        | 0.503236883 | 0.418792739 | 0.343602141 | -0.159634742 | 1.12E-09    | 2.82E-08    |
| EXON1 | SCGB2A1  | 11 | 61976195/61976174                                              | 2 | cg06334737/cg16986846                                                        | 0.56752183  | 0.431454211 | 0.326036145 | -0.241485685 | 5.46E-11    | 3.35E-09    |
| EXON1 | SCGB2A2  | 11 | 62037659                                                       | 1 | cg22862656                                                                   | 0.81272038  | 0.609554289 | 0.447701014 | -0.365019366 | 1.48E-11    | 1.45E-09    |
| EXON1 | SCN2B    | 11 | 118047203/118047121                                            | 2 | cg10513118/cg13348944                                                        | 0.491962675 | 0.402305178 | 0.320984305 | -0.17097837  | 4.66E-08    | 6.20E-07    |
| EXON1 | SCNN1A   | 12 | 6483772/6484729/6483708/6483739/6484219/6484713                | 6 | cg00773370/cg11785537/cg16048383/cg18738906/cg23245485/cg25098281            | 0.540871468 | 0.444526764 | 0.371125275 | -0.169746193 | 1.01E-10    | 4.78E-09    |
| EXON1 | SCTR     | 2  | 120281999/120281813                                            | 2 | cg07176264/cg20505223                                                        | 0.287517405 | 0.314268917 | 0.480911932 | 0.193394527  | 4.00E-05    | 0.000233461 |
| EXON1 | SDC2     | 8  | 97506180/97506251                                              | 2 | cg14538332/cg16935295                                                        | 0.12978423  | 0.237232389 | 0.44108355  | 0.31129932   | 3.81E-06    | 2.90E-05    |
| EXON1 | SDR16C6  | 8  | 57307649                                                       | 1 | cg05553829                                                                   | 0.481092895 | 0.391468678 | 0.318698386 | -0.162394509 | 1.47E-09    | 3.51E-08    |
| EXON1 | SELENBP1 | 1  | 151345123                                                      | 1 | cg24480379                                                                   | 0.490887215 | 0.421913322 | 0.335055195 | -0.15583202  | 1.12E-08    | 1.89E-07    |
| EXON1 | SELV     | 19 | 40006451/40005836/40005812/40006292/40006192/40006625/40005758 | 7 | cg00452257/cg04736260/cg11396791/cg12225910/cg12562967/cg21342437/cg22961275 | 0.175127779 | 0.239213195 | 0.379485826 | 0.204358047  | 3.39E-06    | 2.62E-05    |
| EXON1 | SERINC4  | 15 | 44092166                                                       | 1 | cg02556940                                                                   | 0.86925858  | 0.809470183 | 0.6736888   | -0.19556978  | 1.03E-05    | 6.98E-05    |
| EXON1 | SERPINA1 | 14 | 94855034/94856984/94855088/94855099                            | 4 | cg02126235/cg02181506/cg05346611/cg22828990                                  | 0.728270755 | 0.525884633 | 0.3817073   | -0.346563455 | 5.33E-15    | 2.35E-11    |
| EXON1 | SERPINB5 | 18 | 61144250/61144177/61144150                                     | 3 | cg08411049/cg20837735/cg21807034                                             | 0.514257392 | 0.4132338   | 0.328815711 | -0.185441681 | 1.06E-09    | 2.70E-08    |
| EXON1 | SERPINB7 | 18 | 61420334                                                       | 1 | cg26646554                                                                   | 0.621149885 | 0.534320311 | 0.470877209 | -0.150272676 | 1.83E-08    | 2.83E-07    |
| EXON1 | SFMBT2   | 10 | 7453329                                                        | 1 | cg20506184                                                                   | 0.156079529 | 0.405638556 | 0.595730313 | 0.439650784  | 2.86E-08    | 4.18E-07    |
| EXON1 | SFRP1    | 8  | 41166169/41166530/41166738                                     | 3 | cg13398291/cg15839448/cg22418909                                             | 0.372899918 | 0.444137375 | 0.558119745 | 0.185219828  | 1.71E-07    | 1.91E-06    |
| EXON1 | SFRP2    | 4  | 154709756/154709828/154710224/154709878                        | 4 | cg05774801/cg05874561/cg06549216/cg14063488                                  | 0.170399716 | 0.233315581 | 0.360160385 | 0.18976067   | 0.000943009 | 0.003937835 |
| EXON1 | SFTA3    | 14 | 36982649/36982447                                              | 2 | cg01611862/cg04926361                                                        | 0.306812683 | 0.387726467 | 0.485149523 | 0.17833684   | 1.33E-07    | 1.54E-06    |
| EXON1 | SGCZ     | 8  | 15095163                                                       | 1 | cg16266667                                                                   | 0.35641897  | 0.505215806 | 0.654992595 | 0.298573625  | 4.45E-09    | 8.81E-08    |

|       |          |    |                                                                            |   |                                                                                              |             |             |             |              |             |             |
|-------|----------|----|----------------------------------------------------------------------------|---|----------------------------------------------------------------------------------------------|-------------|-------------|-------------|--------------|-------------|-------------|
| EXON1 | SH2D4B   | 10 | 82297793/8230060<br>0/82297920/823005<br>88                                | 4 | cg08772206/cg10374<br>402/cg10859151/cg2<br>2633936                                          | 0.667622097 | 0.592609963 | 0.515918545 | -0.151703551 | 1.91E-11    | 1.75E-09    |
| EXON1 | SH3GL3   | 15 | 84116151/8411611<br>5/84116107                                             | 3 | cg09201151/cg21145<br>136/cg22946150                                                         | 0.231795257 | 0.242610657 | 0.400988149 | 0.169192892  | 0.002187862 | 0.008369932 |
| EXON1 | SHC3     | 9  | 91793648/9179336<br>5/91793192                                             | 3 | cg13351583/cg14048<br>780/cg17806889                                                         | 0.193664948 | 0.247666081 | 0.35787482  | 0.164209872  | 0.000556702 | 0.002453235 |
| EXON1 | SHISA9   | 16 | 12996338/1299623<br>4/12995568/129956<br>03/12996046/12996<br>419/12996057 | 7 | cg01341170/cg01705<br>052/cg02482218/cg0<br>4106647/cg04557544<br>/cg04613834/cg1857<br>8405 | 0.180185421 | 0.229827183 | 0.364016007 | 0.183830586  | 9.78E-06    | 6.65E-05    |
| EXON1 | SIAH3    | 13 | 46425712/4642583<br>7                                                      | 2 | cg00613224/cg02674<br>384                                                                    | 0.255779335 | 0.338534439 | 0.470898677 | 0.215119342  | 6.54E-07    | 6.10E-06    |
| EXON1 | SIGLEC6  | 19 | 52034861/5203497<br>0                                                      | 2 | cg12008991/cg16293<br>105                                                                    | 0.318704997 | 0.3756759   | 0.471545377 | 0.15284038   | 3.05E-05    | 0.000183526 |
| EXON1 | SIRPG    | 20 | 1638393                                                                    | 1 | cg15722679                                                                                   | 0.39737777  | 0.292677606 | 0.216841866 | -0.180535904 | 4.52E-07    | 4.39E-06    |
| EXON1 | SIX6     | 14 | 60975964/6097611<br>5/60976285                                             | 3 | cg06785999/cg14186<br>066/cg19456540                                                         | 0.39678214  | 0.533290539 | 0.68257002  | 0.28578788   | 1.63E-10    | 6.85E-09    |
| EXON1 | SLC11A1  | 2  | 219246985/219247<br>055                                                    | 2 | cg05007997/cg18854<br>666                                                                    | 0.626903165 | 0.502097061 | 0.37951783  | -0.247385335 | 9.88E-11    | 4.75E-09    |
| EXON1 | SLC12A5  | 20 | 44657838/4465044<br>9/44657948/446503<br>80                                | 4 | cg10439765/cg14921<br>743/cg22752533/cg2<br>3720732                                          | 0.271350453 | 0.347029448 | 0.435984983 | 0.16463453   | 1.47E-06    | 1.25E-05    |
| EXON1 | SLC13A5  | 17 | 6616653/6616644                                                            | 2 | cg16652063/cg24970<br>327                                                                    | 0.397946898 | 0.528784761 | 0.626882582 | 0.228935684  | 6.45E-08    | 8.18E-07    |
| EXON1 | SLC14A2  | 18 | 43195041                                                                   | 1 | cg22207479                                                                                   | 0.59877399  | 0.498156444 | 0.4311451   | -0.16762889  | 9.03E-12    | 1.05E-09    |
| EXON1 | SLC18A3  | 10 | 50820278/5082060<br>4/50818911/508186<br>52/50819500/50818<br>707          | 6 | cg01295399/cg07637<br>213/cg14008883/cg1<br>6494192/cg20457796<br>/cg24109980                | 0.459676352 | 0.523295926 | 0.622336302 | 0.162659951  | 3.93E-08    | 5.41E-07    |
| EXON1 | SLC22A10 | 11 | 63057478/6305759<br>2                                                      | 2 | cg01306183/cg16351<br>441                                                                    | 0.60468788  | 0.479163578 | 0.355024259 | -0.249663621 | 3.71E-10    | 1.20E-08    |
| EXON1 | SLC22A16 | 6  | 110797797                                                                  | 1 | cg05415020                                                                                   | 0.42231626  | 0.479833089 | 0.615592823 | 0.193276563  | 9.92E-09    | 1.72E-07    |
| EXON1 | SLC22A24 | 11 | 62911616                                                                   | 1 | cg16950247                                                                                   | 0.52666063  | 0.380126061 | 0.307141736 | -0.219518894 | 1.83E-13    | 8.62E-11    |
| EXON1 | SLC23A1  | 5  | 138718914                                                                  | 1 | cg21631086                                                                                   | 0.51746788  | 0.419325183 | 0.351424255 | -0.166043625 | 2.49E-11    | 1.98E-09    |
| EXON1 | SLC23A3  | 2  | 220034739                                                                  | 1 | cg15797218                                                                                   | 0.56123755  | 0.462417461 | 0.394757336 | -0.166480214 | 3.45E-11    | 2.47E-09    |
| EXON1 | SLC24A4  | 14 | 92788960/9279028<br>5                                                      | 2 | cg01064918/cg18229<br>521                                                                    | 0.370237775 | 0.463126767 | 0.521846393 | 0.151608618  | 1.66E-05    | 0.000107126 |
| EXON1 | SLC26A1  | 4  | 987108                                                                     | 1 | cg08393516                                                                                   | 0.704847275 | 0.581294967 | 0.527146518 | -0.177700757 | 3.88E-09    | 7.79E-08    |
| EXON1 | SLC26A9  | 1  | 205897159/205897<br>165                                                    | 2 | cg06437052/cg22863<br>880                                                                    | 0.686240295 | 0.603381958 | 0.502892759 | -0.183347536 | 1.65E-07    | 1.85E-06    |

|       |          |    |                                                                                 |   |                                                                                         |             |             |             |              |             |             |
|-------|----------|----|---------------------------------------------------------------------------------|---|-----------------------------------------------------------------------------------------|-------------|-------------|-------------|--------------|-------------|-------------|
| EXON1 | SLC30A10 | 1  | 220101785/220101371/220101698/220101945/220101725/220101728/220101962/220101368 | 8 | cg10325600/cg14848594/cg17721710/cg23815582/cg24396691/cg24933645/cg25317664/cg26685195 | 0.1694661   | 0.217278925 | 0.331099629 | 0.16163353   | 1.02E-05    | 6.92E-05    |
| EXON1 | SLC32A1  | 20 | 37353117/37353158/37353700/37353126                                             | 4 | cg08313939/cg10216615/cg15230781/cg24454144                                             | 0.262829423 | 0.364909067 | 0.511360519 | 0.248531097  | 3.31E-11    | 2.38E-09    |
| EXON1 | SLC35F1  | 6  | 118228869/118228871                                                             | 2 | cg11430157/cg26532358                                                                   | 0.100903596 | 0.172972118 | 0.269015835 | 0.168112239  | 1.81E-05    | 0.000116593 |
| EXON1 | SLC35F3  | 1  | 234040765/234040781/234040833                                                   | 3 | cg05051043/cg09424759/cg25437385                                                        | 0.28101686  | 0.333445822 | 0.492317723 | 0.211300863  | 2.28E-06    | 1.83E-05    |
| EXON1 | SLC36A2  | 5  | 150727045                                                                       | 1 | cg19562321                                                                              | 0.47641976  | 0.321748678 | 0.196324459 | -0.280095301 | 1.44E-14    | 3.38E-11    |
| EXON1 | SLC36A3  | 5  | 150683039/150683178                                                             | 2 | cg00109131/cg22445920                                                                   | 0.750848095 | 0.711970936 | 0.588135614 | -0.162712481 | 1.18E-07    | 1.39E-06    |
| EXON1 | SLC38A4  | 12 | 47219705/47219737                                                               | 2 | cg04053798/cg11146691                                                                   | 0.385961155 | 0.2896573   | 0.218037345 | -0.16792381  | 5.47E-06    | 3.97E-05    |
| EXON1 | SLC39A5  | 12 | 56624552/56623826                                                               | 2 | cg00668685/cg08214142                                                                   | 0.51483157  | 0.417882722 | 0.343827905 | -0.171003665 | 6.59E-11    | 3.84E-09    |
| EXON1 | SLC3A1   | 2  | 44502740/44502977                                                               | 2 | cg02192965/cg03217954                                                                   | 0.59685885  | 0.421190456 | 0.334986914 | -0.261871936 | 3.07E-10    | 1.06E-08    |
| EXON1 | SLC46A2  | 9  | 115653026/115652824                                                             | 2 | cg04881348/cg07758904                                                                   | 0.329247395 | 0.467430022 | 0.5527728   | 0.223525405  | 1.13E-05    | 7.59E-05    |
| EXON1 | SLC4A1   | 17 | 42345488/42345478                                                               | 2 | cg03580247/cg16063416                                                                   | 0.81532451  | 0.733635875 | 0.601379539 | -0.213944971 | 2.91E-08    | 4.23E-07    |
| EXON1 | SLC5A11  | 16 | 24857601/24857579                                                               | 2 | cg04756594/cg23280807                                                                   | 0.53221779  | 0.430310758 | 0.353194905 | -0.179022885 | 1.21E-09    | 2.99E-08    |
| EXON1 | SLC5A7   | 2  | 108603005/108603193                                                             | 2 | cg16232126/cg26333822                                                                   | 0.336260815 | 0.343567149 | 0.498572323 | 0.162311508  | 2.17E-05    | 0.000135661 |
| EXON1 | SLC6A11  | 3  | 10858003                                                                        | 1 | cg16435571                                                                              | 0.25899077  | 0.344020061 | 0.457519318 | 0.198528548  | 1.82E-10    | 7.25E-09    |
| EXON1 | SLC6A15  | 12 | 85306548/85306474/85306323/85306574                                             | 4 | cg02492791/cg14449051/cg19952303/cg24418420                                             | 0.229127629 | 0.269826865 | 0.424654816 | 0.195527187  | 0.000143945 | 0.000732813 |
| EXON1 | SLC6A2   | 16 | 55690564/55690873                                                               | 2 | cg04490714/cg04874129                                                                   | 0.354770675 | 0.431056711 | 0.546153043 | 0.191382368  | 8.78E-08    | 1.07E-06    |
| EXON1 | SLC7A14  | 3  | 170303830/170303721                                                             | 2 | cg18774195/cg21884231                                                                   | 0.328577135 | 0.405935067 | 0.585724873 | 0.257147738  | 5.20E-08    | 6.80E-07    |
| EXON1 | SLC8A3   | 14 | 70655686/70546695/70655382                                                      | 3 | cg05203877/cg16799926/cg20409590                                                        | 0.306404613 | 0.379666643 | 0.512636003 | 0.20623139   | 9.78E-06    | 6.65E-05    |
| EXON1 | SLC9A11  | 1  | 173572181                                                                       | 1 | cg25096142                                                                              | 0.833196155 | 0.726588017 | 0.636620873 | -0.196575282 | 7.94E-06    | 5.53E-05    |
| EXON1 | SLC9A9   | 3  | 143567031                                                                       | 1 | cg23538718                                                                              | 0.161553006 | 0.338766835 | 0.377645814 | 0.216092808  | 2.42E-05    | 0.000148957 |
| EXON1 | SLFN11   | 17 | 33700513                                                                        | 1 | cg05504685                                                                              | 0.362066225 | 0.451851989 | 0.559316886 | 0.197250661  | 2.97E-08    | 4.30E-07    |
| EXON1 | SLFN14   | 17 | 33885049                                                                        | 1 | cg00397422                                                                              | 0.745824695 | 0.608531922 | 0.483036455 | -0.26278824  | 3.63E-07    | 3.63E-06    |

|       |         |    |                                                                                                                                                                                                       |    |                                                                                                                                                                                                                                               |             |             |             |              |             |             |
|-------|---------|----|-------------------------------------------------------------------------------------------------------------------------------------------------------------------------------------------------------|----|-----------------------------------------------------------------------------------------------------------------------------------------------------------------------------------------------------------------------------------------------|-------------|-------------|-------------|--------------|-------------|-------------|
| EXON1 | SLIT1   | 10 | 98945465/9894530<br>0/98945664                                                                                                                                                                        | 3  | cg02741216/cg07143<br>898/cg13196826                                                                                                                                                                                                          | 0.080148571 | 0.131306492 | 0.281122222 | 0.200973651  | 0.000132371 | 0.000680847 |
| EXON1 | SLIT2   | 4  | 20255264/2025534<br>3                                                                                                                                                                                 | 2  | cg03742003/cg08428<br>452                                                                                                                                                                                                                     | 0.257782725 | 0.366029311 | 0.529762009 | 0.271979284  | 1.72E-07    | 1.91E-06    |
| EXON1 | SLIT3   | 5  | 168727752/168728<br>081/168727762/168<br>728076/168727686                                                                                                                                             | 5  | cg01663016/cg07136<br>998/cg09073398/cg1<br>1732619/cg17386093                                                                                                                                                                                | 0.301162019 | 0.384144305 | 0.518711883 | 0.217549864  | 2.86E-08    | 4.18E-07    |
| EXON1 | SLITRK1 | 13 | 84456486/8445552<br>5/84454495/844532<br>80/84456127/84455<br>742/84453665/8445<br>6410/84452994/844<br>54283/84456171/84<br>456308/84455126/8<br>4453836/84455651/<br>84455028/8445557<br>6/84456258 | 18 | cg01729717/cg02365<br>360/cg02772430/cg0<br>4095724/cg07104706<br>/cg10236414/cg1672<br>7923/cg18215217/cg<br>18789918/cg1893739<br>5/cg19696317/cg203<br>12205/cg20826348/c<br>g21448057/cg220577<br>20/cg25188032/cg26<br>799881/cg26998274 | 0.343236057 | 0.431788205 | 0.55327161  | 0.210035553  | 1.10E-11    | 1.22E-09    |
| EXON1 | SLITRK5 | 13 | 88324879                                                                                                                                                                                              | 1  | cg06682197                                                                                                                                                                                                                                    | 0.173845211 | 0.201134676 | 0.395404609 | 0.221559398  | 6.03E-07    | 5.67E-06    |
| EXON1 | SLMAP   | 3  | 57743543/5774337<br>7                                                                                                                                                                                 | 2  | cg00002426/cg15172<br>734                                                                                                                                                                                                                     | 0.47129935  | 0.38730215  | 0.30803932  | -0.16326003  | 1.44E-08    | 2.33E-07    |
| EXON1 | SLPI    | 20 | 43883172                                                                                                                                                                                              | 1  | cg14609407                                                                                                                                                                                                                                    | 0.373817255 | 0.2850587   | 0.214713523 | -0.159103732 | 2.35E-12    | 4.38E-10    |
| EXON1 | SMOC1   | 14 | 70346413/7034647<br>7/70346221/703461<br>51/70346417                                                                                                                                                  | 5  | cg15239123/cg15724<br>184/cg15996043/cg1<br>8493027/cg19504005                                                                                                                                                                                | 0.124645166 | 0.219719925 | 0.38550761  | 0.260862444  | 8.81E-06    | 6.09E-05    |
| EXON1 | SNAP25  | 20 | 10199536                                                                                                                                                                                              | 1  | cg16564824                                                                                                                                                                                                                                    | 0.264246075 | 0.33519145  | 0.472985409 | 0.208739334  | 1.30E-06    | 1.13E-05    |
| EXON1 | SNCG    | 10 | 88718317/8871839<br>3                                                                                                                                                                                 | 2  | cg03677069/cg21012<br>874                                                                                                                                                                                                                     | 0.497614665 | 0.392017356 | 0.296029682 | -0.201584983 | 9.97E-11    | 4.78E-09    |
| EXON1 | SNTG2   | 2  | 946648                                                                                                                                                                                                | 1  | cg09426834                                                                                                                                                                                                                                    | 0.305865165 | 0.362097389 | 0.540930227 | 0.235065062  | 1.41E-06    | 1.20E-05    |
| EXON1 | SORCS1  | 10 | 108924132/108923<br>781                                                                                                                                                                               | 2  | cg13563903/cg16415<br>058                                                                                                                                                                                                                     | 0.275082459 | 0.335265179 | 0.458621235 | 0.183538776  | 4.24E-08    | 5.74E-07    |
| EXON1 | SORCS3  | 10 | 106401517/106401<br>319/106400880/106<br>401479                                                                                                                                                       | 4  | cg01874697/cg10778<br>841/cg16787600/cg1<br>8326021                                                                                                                                                                                           | 0.313590103 | 0.407276963 | 0.531378789 | 0.217788686  | 4.07E-12    | 6.05E-10    |

|       |         |    |                                                                                                                                                                         |    |                                                                                                                                                                                                                                        |             |             |             |              |             |             |
|-------|---------|----|-------------------------------------------------------------------------------------------------------------------------------------------------------------------------|----|----------------------------------------------------------------------------------------------------------------------------------------------------------------------------------------------------------------------------------------|-------------|-------------|-------------|--------------|-------------|-------------|
| EXON1 | SOX1    | 13 | 112724583/112723581/112723477/112723421/112725903/112725605/112722233/112723226/112722333/112723034/112721950/112722719/112724270/112724245/112724454/112724221         | 16 | cg00073003/cg01236132/cg04047221/cg04865691/cg06488256/cg10245273/cg11750165/cg14842777/cg15466862/cg15653173/cg16705627/cg19802138/cg21385666/cg23668285/cg25476766/cg26151467                                                        | 0.345366265 | 0.381839098 | 0.496207146 | 0.150840882  | 1.41E-06    | 1.20E-05    |
| EXON1 | SOX11   | 2  | 5837429/5837929/5836366/5835853/5838258/5833017/5837348/5836256/5836111/5837057/5834638/5832882/5833195/5836231/5840827/5833169/5834062/5837002/5836713/5833774/5836181 | 21 | cg00078318/cg03594550/cg04043795/cg06173889/cg06830064/cg08165221/cg11716272/cg14776201/cg15034345/cg15989068/cg16330247/cg18449120/cg18863333/cg18897632/cg19958021/cg20008332/cg20401252/cg20927661/cg23668184/cg24837370/cg26659079 | 0.447223431 | 0.526076141 | 0.649590502 | 0.202367071  | 4.35E-11    | 2.88E-09    |
| EXON1 | SOX14   | 3  | 137483696/137483992/137483617/137484364/137484220                                                                                                                       | 5  | cg03811478/cg04945331/cg06613095/cg11630154/cg22885558                                                                                                                                                                                 | 0.238239099 | 0.29130647  | 0.421321141 | 0.183082042  | 0.000158636 | 0.000801298 |
| EXON1 | SOX17   | 8  | 55370951/55370544/55370579                                                                                                                                              | 3  | cg00123055/cg02919422/cg26059468                                                                                                                                                                                                       | 0.485218765 | 0.550892078 | 0.669415714 | 0.184196949  | 1.00E-08    | 1.73E-07    |
| EXON1 | SOX7    | 8  | 10588013/10587769                                                                                                                                                       | 2  | cg08056146/cg26077100                                                                                                                                                                                                                  | 0.076560048 | 0.141384326 | 0.268622334 | 0.192062286  | 0.002228053 | 0.008499111 |
| EXON1 | SPAG4L  | 20 | 31592147                                                                                                                                                                | 1  | cg02510802                                                                                                                                                                                                                             | 0.74023952  | 0.573631311 | 0.371162491 | -0.369077029 | 4.41E-12    | 6.34E-10    |
| EXON1 | SPAG6   | 10 | 22634432/22634439                                                                                                                                                       | 2  | cg05099508/cg24031355                                                                                                                                                                                                                  | 0.14319122  | 0.251403974 | 0.375843679 | 0.23265246   | 1.01E-05    | 6.83E-05    |
| EXON1 | SPARC   | 5  | 151066460/151066486/151066484                                                                                                                                           | 3  | cg08331313/cg08879559/cg25587069                                                                                                                                                                                                       | 0.40899071  | 0.459904543 | 0.567749924 | 0.158759214  | 4.21E-06    | 3.15E-05    |
| EXON1 | SPATA16 | 3  | 172859022/172858917/172858969                                                                                                                                           | 3  | cg01216369/cg06577725/cg19933965                                                                                                                                                                                                       | 0.841335905 | 0.708925717 | 0.607703923 | -0.233631982 | 1.04E-08    | 1.78E-07    |
| EXON1 | SPATA19 | 11 | 133715264                                                                                                                                                               | 1  | cg16327839                                                                                                                                                                                                                             | 0.738463435 | 0.701864861 | 0.583711655 | -0.15475178  | 9.82E-06    | 6.67E-05    |

|       |            |    |                                              |   |                                                        |             |             |             |              |             |             |
|-------|------------|----|----------------------------------------------|---|--------------------------------------------------------|-------------|-------------|-------------|--------------|-------------|-------------|
| EXON1 | SPATA21    | 1  | 16763671                                     | 1 | cg26845278                                             | 0.769193215 | 0.715965794 | 0.614876923 | -0.154316292 | 2.95E-05    | 0.000177969 |
| EXON1 | SPATS1     | 6  | 44310445                                     | 1 | cg09662584                                             | 0.157505635 | 0.218517676 | 0.333426755 | 0.17592112   | 1.04E-05    | 7.01E-05    |
| EXON1 | SPDEF      | 6  | 34523925                                     | 1 | cg07705908                                             | 0.440337315 | 0.355744344 | 0.276909786 | -0.163427529 | 1.63E-11    | 1.57E-09    |
| EXON1 | SPEG       | 2  | 220299740/220299900                          | 2 | cg07921384/cg20174636                                  | 0.213680036 | 0.331056603 | 0.515142732 | 0.301462696  | 4.32E-07    | 4.23E-06    |
| EXON1 | SPHKAP     | 2  | 229046325                                    | 1 | cg04072323                                             | 0.285360715 | 0.389797139 | 0.577976023 | 0.292615308  | 6.01E-09    | 1.13E-07    |
| EXON1 | SPO11      | 20 | 55904856/55904875                            | 2 | cg19911058/cg26645834                                  | 0.728778565 | 0.583588719 | 0.48247803  | -0.246300535 | 1.48E-12    | 3.13E-10    |
| EXON1 | SPOCK1     | 5  | 136834877                                    | 1 | cg05143123                                             | 0.139690965 | 0.215181332 | 0.399490303 | 0.259799338  | 8.55E-05    | 0.000459608 |
| EXON1 | SPOCK3     | 4  | 168155695/168155687                          | 2 | cg09722742/cg13913012                                  | 0.145011377 | 0.209011643 | 0.353015779 | 0.208004402  | 4.98E-06    | 3.66E-05    |
| EXON1 | SPSB4      | 3  | 140770751                                    | 1 | cg13874817                                             | 0.223711903 | 0.288352178 | 0.423245082 | 0.199533179  | 5.66E-05    | 0.000318568 |
| EXON1 | SPZ1       | 5  | 79616145                                     | 1 | cg07184465                                             | 0.57792236  | 0.473602033 | 0.359226345 | -0.218696015 | 2.01E-07    | 2.19E-06    |
| EXON1 | SRD5A2     | 2  | 31805970/31805915                            | 2 | cg18948125/cg19502744                                  | 0.494859255 | 0.564542572 | 0.671387095 | 0.17652784   | 1.70E-11    | 1.61E-09    |
| EXON1 | SST        | 3  | 187388148/187387999/187388128                | 3 | cg02164046/cg15347189/cg16927040                       | 0.423200967 | 0.51935202  | 0.650999459 | 0.227798492  | 8.20E-11    | 4.31E-09    |
| EXON1 | SSTR2      | 17 | 71161322/71161178/71161160/71161415/71161258 | 5 | cg06685177/cg13344169/cg21547708/cg26729197/cg27066284 | 0.14472133  | 0.222564019 | 0.340479593 | 0.195758263  | 3.36E-05    | 0.00019965  |
| EXON1 | ST6GALNAC1 | 17 | 74639849/74639793/74639731                   | 3 | cg11469587/cg13015534/cg15503752                       | 0.385521762 | 0.281389767 | 0.225724409 | -0.159797353 | 2.00E-11    | 1.78E-09    |
| EXON1 | ST6GALNAC5 | 1  | 77333229/77333198                            | 2 | cg04077662/cg06201642                                  | 0.26808874  | 0.377675175 | 0.53033383  | 0.26224509   | 1.48E-07    | 1.69E-06    |
| EXON1 | ST8SIA1    | 12 | 22487437/22487459/22487219                   | 3 | cg09354309/cg10333808/cg24723331                       | 0.135148496 | 0.178398841 | 0.346324339 | 0.211175843  | 0.00031756  | 0.001484979 |
| EXON1 | ST8SIA3    | 18 | 55020099/55019843                            | 2 | cg04017533/cg13096208                                  | 0.41537209  | 0.499723978 | 0.684239282 | 0.268867192  | 2.50E-10    | 9.09E-09    |
| EXON1 | ST8SIA4    | 5  | 100238977/100238983/100238655/100238819      | 4 | cg03975797/cg04380513/cg13320626/cg18428516            | 0.130378203 | 0.211127316 | 0.324879061 | 0.194500859  | 1.60E-05    | 0.000103895 |
| EXON1 | ST8SIA5    | 18 | 44336399                                     | 1 | cg19751300                                             | 0.246936895 | 0.371629106 | 0.542666518 | 0.295729623  | 1.23E-08    | 2.04E-07    |
| EXON1 | STAB2      | 12 | 103981113                                    | 1 | cg10622586                                             | 0.53435505  | 0.432629811 | 0.376232255 | -0.158122795 | 1.01E-09    | 2.60E-08    |
| EXON1 | STAC       | 3  | 36422198/36422209                            | 2 | cg15321293/cg26615813                                  | 0.288692615 | 0.406833989 | 0.543879364 | 0.255186749  | 1.93E-11    | 1.75E-09    |
| EXON1 | STAG3      | 7  | 99775558                                     | 1 | cg00553149                                             | 0.51321916  | 0.611819217 | 0.685586805 | 0.172367645  | 1.50E-08    | 2.41E-07    |
| EXON1 | STAP1      | 4  | 68424495                                     | 1 | cg12879425                                             | 0.515848295 | 0.456623606 | 0.33362903  | -0.182219265 | 0.000125038 | 0.000647157 |
| EXON1 | STK33      | 11 | 8615456/8615356                              | 2 | cg21045608/cg26668837                                  | 0.141130164 | 0.273080832 | 0.449408659 | 0.308278495  | 1.12E-06    | 9.87E-06    |
| EXON1 | STMN2      | 8  | 80523413                                     | 1 | cg09071889                                             | 0.37668888  | 0.499617317 | 0.643886368 | 0.267197488  | 1.24E-09    | 3.07E-08    |

|       |         |    |                                                   |   |                                                        |             |             |             |              |             |             |
|-------|---------|----|---------------------------------------------------|---|--------------------------------------------------------|-------------|-------------|-------------|--------------|-------------|-------------|
| EXON1 | STOX2   | 4  | 184826953/184827086/184827754/184827491/184826704 | 5 | cg01758805/cg02071076/cg02500300/cg06367693/cg11354594 | 0.222166173 | 0.24050692  | 0.39943448  | 0.177268306  | 0.00033048  | 0.001535625 |
| EXON1 | STRA6   | 15 | 74495354/74501317/74495109/74495384               | 4 | cg00075967/cg11680605/cg11787522/cg26774156            | 0.54655957  | 0.447397081 | 0.348826711 | -0.197732859 | 2.83E-13    | 1.14E-10    |
| EXON1 | STX19   | 3  | 93747410                                          | 1 | cg27200466                                             | 0.58232939  | 0.443080756 | 0.341259436 | -0.241069954 | 2.25E-11    | 1.91E-09    |
| EXON1 | SUNC1   | 7  | 48068665                                          | 1 | cg23509098                                             | 0.70715429  | 0.561490989 | 0.376269341 | -0.330884949 | 9.92E-14    | 5.47E-11    |
| EXON1 | SUSD5   | 3  | 33260366                                          | 1 | cg09463233                                             | 0.175253587 | 0.312971031 | 0.436781936 | 0.261528349  | 9.08E-06    | 6.25E-05    |
| EXON1 | SV2A    | 1  | 149889364/149889361/149889339/149889330           | 4 | cg01705587/cg04927502/cg11085602/cg24629122            | 0.090721684 | 0.157913011 | 0.265194618 | 0.174472933  | 6.84E-05    | 0.00037754  |
| EXON1 | SYCN    | 19 | 39694617/39694831/39694709                        | 3 | cg00880452/cg02863073/cg22290648                       | 0.364387483 | 0.456311865 | 0.593968955 | 0.229581471  | 1.89E-05    | 0.000120902 |
| EXON1 | SYCP2L  | 6  | 10887367/10887185                                 | 2 | cg03320827/cg26237681                                  | 0.251650399 | 0.311186155 | 0.50790396  | 0.256253561  | 8.40E-07    | 7.61E-06    |
| EXON1 | SYT16   | 14 | 62462754                                          | 1 | cg14479704                                             | 0.537808285 | 0.489511656 | 0.366810405 | -0.17099788  | 6.53E-08    | 8.27E-07    |
| EXON1 | SYT6    | 1  | 114696465/114696462/114696350                     | 3 | cg05368341/cg09177131/cg19304150                       | 0.224724152 | 0.298136266 | 0.469972501 | 0.245248349  | 3.20E-07    | 3.29E-06    |
| EXON1 | SYT8    | 11 | 1855746                                           | 1 | cg03861143                                             | 0.55054825  | 0.440729306 | 0.354293586 | -0.196254664 | 1.30E-11    | 1.34E-09    |
| EXON1 | SYT9    | 11 | 7273498/7273378                                   | 2 | cg08185661/cg22723056                                  | 0.271750638 | 0.313409167 | 0.454316533 | 0.182565895  | 0.000126964 | 0.000656096 |
| EXON1 | SYTL3   | 6  | 159071106/159071076                               | 2 | cg00370106/cg17768957                                  | 0.327156584 | 0.194945248 | 0.15898317  | -0.168173414 | 4.06E-08    | 5.54E-07    |
| EXON1 | T       | 6  | 166581929                                         | 1 | cg23688510                                             | 0.214341215 | 0.322834378 | 0.444819487 | 0.230478272  | 0.000973211 | 0.004049891 |
| EXON1 | T-SP1   | 8  | 10383156                                          | 1 | cg23996846                                             | 0.74477846  | 0.684692189 | 0.577011155 | -0.167767305 | 2.71E-06    | 2.14E-05    |
| EXON1 | TAAR5   | 6  | 132910681                                         | 1 | cg17829936                                             | 0.580202615 | 0.508016006 | 0.359380223 | -0.220822392 | 4.15E-08    | 5.63E-07    |
| EXON1 | TAC1    | 7  | 97361408                                          | 1 | cg16288089                                             | 0.38903177  | 0.447987311 | 0.610351032 | 0.221319262  | 1.29E-05    | 8.55E-05    |
| EXON1 | TACR3   | 4  | 104640489/104640772/104640833/104640662/104640560 | 5 | cg04263186/cg14664621/cg16461251/cg18538958/cg20128928 | 0.423942778 | 0.4944614   | 0.608301675 | 0.184358897  | 4.55E-10    | 1.40E-08    |
| EXON1 | TAS2R16 | 7  | 122635026/122635522                               | 2 | cg03640110/cg12150401                                  | 0.6599219   | 0.617255522 | 0.500084118 | -0.159837782 | 0.001662246 | 0.006554354 |
| EXON1 | TAS2R8  | 12 | 10958919                                          | 1 | cg21156620                                             | 0.639956295 | 0.561372061 | 0.399305305 | -0.24065099  | 5.33E-13    | 1.76E-10    |
| EXON1 | TAS2R9  | 12 | 10962437                                          | 1 | cg20090497                                             | 0.68535001  | 0.525841789 | 0.424362132 | -0.260987878 | 6.57E-08    | 8.31E-07    |
| EXON1 | TBX15   | 1  | 119532093/119532116/119532044/119532056           | 4 | cg07892597/cg10703826/cg14565725/cg24884142            | 0.444946935 | 0.553125828 | 0.682131064 | 0.237184129  | 1.12E-08    | 1.88E-07    |
| EXON1 | TBX18   | 6  | 85473773                                          | 1 | cg01461410                                             | 0.269517745 | 0.379933733 | 0.499295677 | 0.229777932  | 3.68E-08    | 5.12E-07    |

|       |          |    |                                                                                  |   |                                                                                                    |             |             |             |              |             |             |
|-------|----------|----|----------------------------------------------------------------------------------|---|----------------------------------------------------------------------------------------------------|-------------|-------------|-------------|--------------|-------------|-------------|
| EXON1 | TBXAS1   | 7  | 139478207/139529130                                                              | 2 | cg01014432/cg12104698                                                                              | 0.50486484  | 0.410135933 | 0.337697018 | -0.167167822 | 6.15E-11    | 3.63E-09    |
| EXON1 | TCERG1L  | 10 | 133109867                                                                        | 1 | cg06304097                                                                                         | 0.25418814  | 0.348217361 | 0.449764073 | 0.195575933  | 3.60E-08    | 5.03E-07    |
| EXON1 | TCF21    | 6  | 134210667/134210946/134210812/134210273/134210279/134210307/134210598            | 7 | cg03087607/cg04467618/cg04692403/cg12468478/cg17470942/cg24157171/cg24215443                       | 0.370400736 | 0.415368787 | 0.53662237  | 0.166221634  | 8.07E-08    | 1.00E-06    |
| EXON1 | TCP10    | 6  | 167797877                                                                        | 1 | cg19930296                                                                                         | 0.7115431   | 0.607950922 | 0.492313495 | -0.219229605 | 3.59E-08    | 5.03E-07    |
| EXON1 | TCP10L2  | 6  | 167584201                                                                        | 1 | cg16214245                                                                                         | 0.718269    | 0.609363256 | 0.498562314 | -0.219706686 | 6.80E-08    | 8.58E-07    |
| EXON1 | TCTEX1D1 | 1  | 67218165                                                                         | 1 | cg25339566                                                                                         | 0.366130975 | 0.456969483 | 0.614285277 | 0.248154302  | 8.62E-06    | 5.97E-05    |
| EXON1 | TDO2     | 4  | 156824883                                                                        | 1 | cg04795662                                                                                         | 0.510825065 | 0.410470811 | 0.313949386 | -0.196875679 | 2.15E-07    | 2.32E-06    |
| EXON1 | TDRD10   | 1  | 154475139/154475068/154475173/154475269/154474800                                | 5 | cg02457680/cg05637536/cg18081940/cg19360104/cg25460143                                             | 0.359023792 | 0.42043062  | 0.549326857 | 0.190303065  | 2.01E-09    | 4.51E-08    |
| EXON1 | TEKT1    | 17 | 6734991                                                                          | 1 | cg13337865                                                                                         | 0.17634453  | 0.218720239 | 0.343863945 | 0.167519415  | 4.18E-05    | 0.000242753 |
| EXON1 | TEKT2    | 1  | 36549719/36549726                                                                | 2 | cg19644018/cg24813212                                                                              | 0.123482982 | 0.178071389 | 0.275627008 | 0.152144026  | 0.000826083 | 0.003491452 |
| EXON1 | TEX15    | 8  | 30705886                                                                         | 1 | cg19418958                                                                                         | 0.4878085   | 0.373841783 | 0.287975295 | -0.199833205 | 4.86E-12    | 6.55E-10    |
| EXON1 | TF       | 3  | 133465180                                                                        | 1 | cg24879335                                                                                         | 0.359086565 | 0.403408922 | 0.534619114 | 0.175532549  | 7.70E-05    | 0.000418721 |
| EXON1 | TFEC     | 7  | 115670795                                                                        | 1 | cg15339605                                                                                         | 0.260855737 | 0.142948516 | 0.083422935 | -0.177432802 | 2.39E-08    | 3.58E-07    |
| EXON1 | TFF1     | 21 | 43786627                                                                         | 1 | cg06099014                                                                                         | 0.495460795 | 0.409595083 | 0.328818418 | -0.166642377 | 2.91E-11    | 2.21E-09    |
| EXON1 | TFPI2    | 7  | 93520036/93520024/93519924/93520012                                              | 4 | cg14775114/cg17338208/cg23686014/cg24531255                                                        | 0.142450764 | 0.321753576 | 0.519702184 | 0.377251421  | 1.00E-11    | 1.15E-09    |
| EXON1 | TGM3     | 20 | 2276663                                                                          | 1 | cg24731241                                                                                         | 0.624083145 | 0.540739672 | 0.429558477 | -0.194524668 | 2.28E-10    | 8.55E-09    |
| EXON1 | TGM4     | 3  | 44916102                                                                         | 1 | cg26264008                                                                                         | 0.49521531  | 0.4171876   | 0.333413573 | -0.161801737 | 1.62E-08    | 2.55E-07    |
| EXON1 | THBD     | 20 | 23028977/23029640/23030250/23028890/23030102/23029298/23029287/23028304/23029806 | 9 | cg07255664/cg08354093/cg09279949/cg10505785/cg11769163/cg16339238/cg17368760/cg20096897/cg24562819 | 0.389573577 | 0.478798267 | 0.575408563 | 0.185834986  | 3.13E-08    | 4.49E-07    |
| EXON1 | THBS4    | 5  | 79331047                                                                         | 1 | cg03336086                                                                                         | 0.23092927  | 0.293593278 | 0.419941482 | 0.189012212  | 0.000416201 | 0.001888826 |
| EXON1 | THEM5    | 1  | 151825974/151826167/151826123                                                    | 3 | cg01062247/cg11344950/cg18081104                                                                   | 0.50145591  | 0.420248339 | 0.32742578  | -0.17403013  | 1.44E-10    | 6.27E-09    |
| EXON1 | THEMIS   | 6  | 128222053/128239611                                                              | 2 | cg11610626/cg17113883                                                                              | 0.623721595 | 0.534845003 | 0.44263518  | -0.181086415 | 9.78E-09    | 1.70E-07    |



|       |          |    |                                         |   |                                             |             |             |             |              |             |             |
|-------|----------|----|-----------------------------------------|---|---------------------------------------------|-------------|-------------|-------------|--------------|-------------|-------------|
| EXON1 | THY1     | 11 | 119293861/119293869/119293863           | 3 | cg10601287/cg16566400/cg17236709            | 0.307441023 | 0.412989475 | 0.529199909 | 0.221758887  | 1.44E-05    | 9.46E-05    |
| EXON1 | TIAM2    | 6  | 155538155                               | 1 | cg16333846                                  | 0.616862365 | 0.544267617 | 0.437494659 | -0.179367706 | 6.37E-09    | 1.19E-07    |
| EXON1 | TLL1     | 4  | 166794471/166794895/166794971/166794786 | 4 | cg08570521/cg09669853/cg19898128/cg24521633 | 0.14149001  | 0.220108282 | 0.378027405 | 0.236537396  | 9.05E-06    | 6.24E-05    |
| EXON1 | TLX1     | 10 | 102891076/102891568/102891280/102891080 | 4 | cg02096397/cg02450004/cg05329692/cg27272677 | 0.206961461 | 0.194047207 | 0.357389394 | 0.150427934  | 0.000995969 | 0.004132895 |
| EXON1 | TLX1NB   | 10 | 102890886                               | 1 | cg11196237                                  | 0.213237165 | 0.223588122 | 0.368317932 | 0.155080767  | 0.000303516 | 0.00142535  |
| EXON1 | TM4SF19  | 3  | 196065189                               | 1 | cg02322879                                  | 0.796740025 | 0.720172167 | 0.631556873 | -0.165183152 | 1.17E-05    | 7.79E-05    |
| EXON1 | TM4SF20  | 2  | 228243972                               | 1 | cg20683151                                  | 0.61808082  | 0.523253783 | 0.456970095 | -0.161110725 | 1.16E-07    | 1.37E-06    |
| EXON1 | TM4SF4   | 3  | 149192609                               | 1 | cg05483388                                  | 0.533137955 | 0.438724928 | 0.357236132 | -0.175901823 | 3.76E-12    | 5.86E-10    |
| EXON1 | TM6SF1   | 15 | 83776422/83776446/83776420              | 3 | cg03063639/cg14696396/cg26460092            | 0.288529638 | 0.477104186 | 0.674643993 | 0.386114356  | 3.82E-14    | 3.78E-11    |
| EXON1 | TMEFF2   | 2  | 193059405/193059230                     | 2 | cg06856528/cg18221862                       | 0.227860498 | 0.331233553 | 0.445708082 | 0.217847584  | 1.40E-06    | 1.20E-05    |
| EXON1 | TMEM105  | 17 | 79304420/79304188                       | 2 | cg15913671/cg23514211                       | 0.403521475 | 0.322171772 | 0.251286836 | -0.152234639 | 4.18E-11    | 2.84E-09    |
| EXON1 | TMEM108  | 3  | 132757267                               | 1 | cg09090724                                  | 0.31674414  | 0.423175194 | 0.552739118 | 0.235994978  | 9.13E-10    | 2.45E-08    |
| EXON1 | TMEM130  | 7  | 98467571                                | 1 | cg01307939                                  | 0.072572016 | 0.210948573 | 0.306677468 | 0.234105452  | 2.16E-11    | 1.85E-09    |
| EXON1 | TMEM132D | 12 | 130387861/130387821/130388198           | 3 | cg03469054/cg11160362/cg23266743            | 0.420658665 | 0.495962311 | 0.607788034 | 0.187129369  | 1.57E-09    | 3.69E-08    |
| EXON1 | TMEM139  | 7  | 142982463/142982262                     | 2 | cg08261841/cg26511386                       | 0.576420968 | 0.44608855  | 0.335559352 | -0.240861615 | 4.41E-12    | 6.34E-10    |
| EXON1 | TMEM155  | 4  | 122686269/122686038/122686319           | 3 | cg05396987/cg10863741/cg21077559            | 0.25409643  | 0.370161301 | 0.524858427 | 0.270761997  | 2.02E-10    | 7.89E-09    |
| EXON1 | TMEM179  | 14 | 105070998/105070864                     | 2 | cg00107187/cg10281977                       | 0.279454658 | 0.306052686 | 0.436962132 | 0.157507474  | 0.000189462 | 0.000939777 |
| EXON1 | TMEM196  | 7  | 19812327                                | 1 | cg08991339                                  | 0.276333955 | 0.324308372 | 0.432952155 | 0.1566182    | 1.58E-05    | 0.000102975 |
| EXON1 | TMEM212  | 3  | 171561201                               | 1 | cg13581779                                  | 0.62128399  | 0.7349586   | 0.78306295  | 0.16177896   | 3.66E-12    | 5.77E-10    |
| EXON1 | TMEM215  | 9  | 32783516                                | 1 | cg11308840                                  | 0.262321    | 0.324663561 | 0.42953105  | 0.16721005   | 4.92E-05    | 0.00028155  |
| EXON1 | TMEM220  | 17 | 10633470                                | 1 | cg01275588                                  | 0.219031841 | 0.251888634 | 0.387590759 | 0.168558918  | 0.010184019 | 0.032843585 |
| EXON1 | TMEM26   | 10 | 63213192/63212862/63213104/63212815     | 4 | cg02853012/cg09135551/cg18192919/cg26785954 | 0.177527685 | 0.231648921 | 0.34482665  | 0.167298965  | 8.97E-07    | 8.08E-06    |
| EXON1 | TMEM40   | 3  | 12800802                                | 1 | cg24290948                                  | 0.75814872  | 0.6240729   | 0.501171659 | -0.256977061 | 8.40E-12    | 9.97E-10    |
| EXON1 | TMEM71   | 8  | 133772889/133772742                     | 2 | cg20955688/cg27159719                       | 0.321192697 | 0.169322804 | 0.169164931 | -0.152027765 | 9.77E-06    | 6.65E-05    |

|       |           |    |                                                                                                               |    |                                                                                                                                       |             |             |             |              |             |             |
|-------|-----------|----|---------------------------------------------------------------------------------------------------------------|----|---------------------------------------------------------------------------------------------------------------------------------------|-------------|-------------|-------------|--------------|-------------|-------------|
| EXON1 | TMEM90B   | 20 | 24450353/2444986<br>5/24449916/244503<br>61                                                                   | 4  | cg09623400/cg16098<br>981/cg16120788/cg1<br>9654195                                                                                   | 0.277829595 | 0.376966383 | 0.457964334 | 0.180134739  | 8.15E-06    | 5.67E-05    |
| EXON1 | TMPRSS11A | 4  | 68829101                                                                                                      | 1  | cg23734503                                                                                                                            | 0.8005691   | 0.724733106 | 0.645190427 | -0.155378673 | 0.001023074 | 0.004230775 |
| EXON1 | TMPRSS11B | 4  | 69111391                                                                                                      | 1  | cg06399881                                                                                                                            | 0.723383995 | 0.599150383 | 0.495239614 | -0.228144381 | 1.62E-09    | 3.76E-08    |
| EXON1 | TMPRSS11E | 4  | 69313197                                                                                                      | 1  | cg24792113                                                                                                                            | 0.396462015 | 0.294216533 | 0.240996355 | -0.15546566  | 1.26E-09    | 3.10E-08    |
| EXON1 | TMPRSS4   | 11 | 117947997/117947<br>877                                                                                       | 2  | cg05416223/cg22957<br>898                                                                                                             | 0.420708625 | 0.338771175 | 0.268289677 | -0.152418948 | 8.31E-11    | 4.31E-09    |
| EXON1 | TNFAIP2   | 14 | 103592734                                                                                                     | 1  | cg04264002                                                                                                                            | 0.54440615  | 0.451647061 | 0.385773686 | -0.158632464 | 1.62E-06    | 1.35E-05    |
| EXON1 | TNFRSF25  | 1  | 6526129/6526182                                                                                               | 2  | cg10059687/cg12814<br>070                                                                                                             | 0.49407118  | 0.586896289 | 0.646923132 | 0.152851952  | 1.05E-05    | 7.07E-05    |
| EXON1 | TNFRSF8   | 1  | 12123554/1218607<br>9/12123437                                                                                | 3  | cg05121790/cg10058<br>766/cg17897879                                                                                                  | 0.374147229 | 0.453641684 | 0.546550893 | 0.172403665  | 4.59E-08    | 6.13E-07    |
| EXON1 | TNR       | 1  | 175712552/175712<br>382                                                                                       | 2  | cg05996213/cg07107<br>171                                                                                                             | 0.22574769  | 0.271962389 | 0.393704888 | 0.167957198  | 0.00163262  | 0.006450993 |
| EXON1 | TOB1      | 17 | 48939676/4894103<br>9                                                                                         | 2  | cg13119853/cg14494<br>812                                                                                                             | 0.57467162  | 0.464720517 | 0.376260136 | -0.198411484 | 1.36E-09    | 3.29E-08    |
| EXON1 | TP53BP1   | 15 | 43802612                                                                                                      | 1  | cg04678936                                                                                                                            | 0.384831545 | 0.476032261 | 0.53960045  | 0.154768905  | 3.62E-07    | 3.62E-06    |
| EXON1 | TP63      | 3  | 189349278/189349<br>323                                                                                       | 2  | cg04483101/cg21723<br>486                                                                                                             | 0.731350968 | 0.580754875 | 0.449463195 | -0.281887772 | 6.78E-09    | 1.25E-07    |
| EXON1 | TPD52     | 8  | 80992750/8108382<br>9                                                                                         | 2  | cg16773115/cg22273<br>042                                                                                                             | 0.61247576  | 0.492659661 | 0.383975359 | -0.228500401 | 2.19E-11    | 1.87E-09    |
| EXON1 | TPD52L3   | 9  | 6328386/6328493                                                                                               | 2  | cg03485840/cg14286<br>682                                                                                                             | 0.624802443 | 0.523139206 | 0.448331048 | -0.176471395 | 7.60E-11    | 4.12E-09    |
| EXON1 | TPM4      | 19 | 16178514/1617842<br>6/16187364                                                                                | 3  | cg09926488/cg22270<br>364/cg25593560                                                                                                  | 0.7752139   | 0.741008956 | 0.6135898   | -0.1616241   | 0.000402334 | 0.001835335 |
| EXON1 | TPTE2     | 13 | 20110871                                                                                                      | 1  | cg19950767                                                                                                                            | 0.73145477  | 0.68496045  | 0.573175373 | -0.158279397 | 2.86E-06    | 2.25E-05    |
| EXON1 | TREM2     | 6  | 41130917                                                                                                      | 1  | cg01980222                                                                                                                            | 0.5824335   | 0.493762728 | 0.41245735  | -0.16997615  | 2.57E-06    | 2.04E-05    |
| EXON1 | TRH       | 3  | 129693613/129693<br>586/129693385/129<br>693370/129693489                                                     | 5  | cg01009664/cg02700<br>891/cg11940285/cg1<br>8862481/cg22512438                                                                        | 0.30922142  | 0.419885811 | 0.616723861 | 0.307502441  | 1.16E-08    | 1.93E-07    |
| EXON1 | TRHDE     | 12 | 72667236/7266732<br>6/72666976/726671<br>50                                                                   | 4  | cg01030121/cg09972<br>192/cg13663218/cg2<br>7579953                                                                                   | 0.312842455 | 0.397417921 | 0.574754972 | 0.261912517  | 7.01E-10    | 1.99E-08    |
| EXON1 | TRIB2     | 2  | 12857398/1285865<br>5/12858604/128570<br>67/12858298/12858<br>555/12857572/1285<br>7811/12857652/128<br>58483 | 10 | cg01322165/cg05353<br>478/cg11385684/cg1<br>3769605/cg13776499<br>/cg13921956/cg1503<br>3181/cg18155032/cg<br>24543400/cg2562393<br>4 | 0.087995671 | 0.146418624 | 0.244196487 | 0.156200817  | 0.000290954 | 0.001372693 |

|       |         |    |                                                                                                                                                                                                                                |   |                                                                                                                                                                                                                                                                             |             |             |             |              |          |             |
|-------|---------|----|--------------------------------------------------------------------------------------------------------------------------------------------------------------------------------------------------------------------------------|---|-----------------------------------------------------------------------------------------------------------------------------------------------------------------------------------------------------------------------------------------------------------------------------|-------------|-------------|-------------|--------------|----------|-------------|
| EXON1 | TRIM15  | 6  | 30131821/3013121<br>9/30131283/301318<br>40/30131570/30131<br>526/30131806/3013<br>1755/30131361/301<br>31001/30131634/30 20<br>131719/30131458/3<br>0131613/30131586/<br>30131214/3013169<br>1/30131189/301317<br>49/30131467 | 2 | cg00628477/cg00720<br>829/cg00879790/cg0<br>1905142/cg02012483<br>/cg03609216/cg0523<br>5884/cg05664039/cg<br>05701418/cg0605131<br>1/cg07421969/cg097<br>69113/cg12232118/c<br>g14815183/cg204887<br>56/cg21856784/cg21<br>988950/cg22425467/<br>cg23778358/cg27583<br>815 | 0.51885103  | 0.43111449  | 0.35348023  | -0.1653708   | 1.42E-11 | 1.44E-09    |
| EXON1 | TRIM42  | 3  | 140396963/140397<br>089                                                                                                                                                                                                        | 2 | cg06090362/cg12242<br>338                                                                                                                                                                                                                                                   | 0.604944873 | 0.495699642 | 0.41210398  | -0.192840893 | 3.19E-08 | 4.56E-07    |
| EXON1 | TRIM61  | 4  | 165898707                                                                                                                                                                                                                      | 1 | cg25147158                                                                                                                                                                                                                                                                  | 0.521835355 | 0.616170856 | 0.697822795 | 0.17598744   | 8.25E-09 | 1.47E-07    |
| EXON1 | TRIM64B | 11 | 89609024                                                                                                                                                                                                                       | 1 | cg24005701                                                                                                                                                                                                                                                                  | 0.519617555 | 0.447735233 | 0.368904495 | -0.15071306  | 3.43E-08 | 4.85E-07    |
| EXON1 | TRIM71  | 3  | 32860178/3286000<br>4/32859587/328595<br>58                                                                                                                                                                                    | 4 | cg12338417/cg18405<br>727/cg19741945/cg2<br>3243038                                                                                                                                                                                                                         | 0.212840747 | 0.273316637 | 0.402333762 | 0.189493016  | 3.43E-06 | 2.64E-05    |
| EXON1 | TRIM72  | 16 | 31225357/3122535<br>0                                                                                                                                                                                                          | 2 | cg07620544/cg27124<br>512                                                                                                                                                                                                                                                   | 0.55506601  | 0.466283875 | 0.388951707 | -0.166114303 | 2.46E-08 | 3.68E-07    |
| EXON1 | TRIM75  | 4  | 165980885                                                                                                                                                                                                                      | 1 | cg03505125                                                                                                                                                                                                                                                                  | 0.62360929  | 0.557372533 | 0.456281373 | -0.167327917 | 1.05E-05 | 7.09E-05    |
| EXON1 | TRPC4   | 13 | 38443783/3844380<br>9                                                                                                                                                                                                          | 2 | cg02057391/cg21432<br>954                                                                                                                                                                                                                                                   | 0.319926323 | 0.397168133 | 0.53258843  | 0.212662107  | 4.47E-05 | 0.000257725 |
| EXON1 | TRPC6   | 11 | 101454317/101454<br>626                                                                                                                                                                                                        | 2 | cg03411507/cg11016<br>563                                                                                                                                                                                                                                                   | 0.33482509  | 0.403225172 | 0.58180788  | 0.24698279   | 2.97E-11 | 2.24E-09    |
| EXON1 | TRPC7   | 5  | 135701094/135701<br>050                                                                                                                                                                                                        | 2 | cg06448705/cg23288<br>973                                                                                                                                                                                                                                                   | 0.416880065 | 0.493009661 | 0.615086455 | 0.19820639   | 1.17E-08 | 1.95E-07    |
| EXON1 | TRPM6   | 9  | 77502747/7750296<br>3                                                                                                                                                                                                          | 2 | cg14095101/cg16509<br>045                                                                                                                                                                                                                                                   | 0.41669142  | 0.324089622 | 0.245631121 | -0.171060299 | 1.68E-10 | 6.97E-09    |
| EXON1 | TSPAN16 | 19 | 11406993/1140687<br>7                                                                                                                                                                                                          | 2 | cg17496921/cg25382<br>751                                                                                                                                                                                                                                                   | 0.606808085 | 0.511094744 | 0.415950014 | -0.190858071 | 1.25E-08 | 2.07E-07    |
| EXON1 | TSPAN18 | 11 | 44927976                                                                                                                                                                                                                       | 1 | cg06401614                                                                                                                                                                                                                                                                  | 0.48198153  | 0.3867593   | 0.316124595 | -0.165856935 | 1.09E-10 | 5.10E-09    |
| EXON1 | TTN     | 2  | 179672121/179672<br>126                                                                                                                                                                                                        | 2 | cg05185019/cg10859<br>358                                                                                                                                                                                                                                                   | 0.776356565 | 0.58309665  | 0.495723477 | -0.280633088 | 8.73E-09 | 1.54E-07    |
| EXON1 | TTYH1   | 19 | 54926805/5492673<br>4                                                                                                                                                                                                          | 2 | cg09474331/cg23695<br>687                                                                                                                                                                                                                                                   | 0.184290943 | 0.320623184 | 0.49677406  | 0.312483117  | 1.70E-07 | 1.90E-06    |
| EXON1 | TUSC3   | 8  | 15397899/1539773<br>1/15397729/153980<br>53                                                                                                                                                                                    | 4 | cg03032098/cg03127<br>174/cg18145877/cg2<br>6374823                                                                                                                                                                                                                         | 0.317675669 | 0.429652578 | 0.539913742 | 0.222238073  | 4.75E-09 | 9.22E-08    |
| EXON1 | TWIST1  | 7  | 19157193/1915690<br>2/19157263/191565<br>50/19156621                                                                                                                                                                           | 5 | cg17839237/cg20052<br>718/cg24446548/cg2<br>6312150/cg26818735                                                                                                                                                                                                              | 0.110370943 | 0.198173023 | 0.364804639 | 0.254433696  | 1.25E-08 | 2.08E-07    |

|       |         |    |                                     |   |                                             |             |             |             |              |             |             |
|-------|---------|----|-------------------------------------|---|---------------------------------------------|-------------|-------------|-------------|--------------|-------------|-------------|
| EXON1 | TXLNB   | 6  | 139613145                           | 1 | cg18953104                                  | 0.409258315 | 0.539306706 | 0.625136177 | 0.215877862  | 1.34E-09    | 3.24E-08    |
| EXON1 | TXNDC3  | 7  | 37888257                            | 1 | cg11932205                                  | 0.60284149  | 0.518042039 | 0.436088327 | -0.166753163 | 3.03E-10    | 1.06E-08    |
| EXON1 | UBE2QL1 | 5  | 6449090/6449153/6449001             | 3 | cg06997381/cg13955436/cg26692294            | 0.090937498 | 0.163753928 | 0.286507531 | 0.195570033  | 3.46E-05    | 0.000204814 |
| EXON1 | UCHL1   | 4  | 41258910/41258935                   | 2 | cg07068756/cg16142306                       | 0.180193261 | 0.216928306 | 0.377133643 | 0.196940382  | 0.001489093 | 0.005942445 |
| EXON1 | UGT2A2  | 4  | 70504750                            | 1 | cg02219607                                  | 0.854529735 | 0.804295483 | 0.638369209 | -0.216160526 | 9.11E-06    | 6.26E-05    |
| EXON1 | UGT2B15 | 4  | 69536319                            | 1 | cg22161115                                  | 0.42884956  | 0.323746544 | 0.245807791 | -0.183041769 | 1.59E-11    | 1.53E-09    |
| EXON1 | UGT3A1  | 5  | 35991382                            | 1 | cg19897071                                  | 0.50859441  | 0.588819472 | 0.686613518 | 0.178019108  | 2.84E-08    | 4.17E-07    |
| EXON1 | UGT3A2  | 5  | 36066972/36066944                   | 2 | cg10140794/cg27638727                       | 0.24182068  | 0.320017039 | 0.399293809 | 0.157473129  | 2.25E-06    | 1.81E-05    |
| EXON1 | UNC5C   | 4  | 96470053/96470094                   | 2 | cg00329039/cg10520887                       | 0.247111658 | 0.332582539 | 0.448170536 | 0.201058879  | 3.76E-06    | 2.87E-05    |
| EXON1 | UNC80   | 2  | 210636844/210636748/210636783       | 3 | cg01082843/cg13347071/cg24915947            | 0.299552768 | 0.363986007 | 0.503958223 | 0.204405454  | 5.58E-08    | 7.23E-07    |
| EXON1 | UNCX    | 7  | 1272710                             | 1 | cg03092191                                  | 0.266196025 | 0.287000883 | 0.467925414 | 0.201729389  | 6.69E-05    | 0.000370432 |
| EXON1 | USH2A   | 1  | 216596639                           | 1 | cg15590780                                  | 0.428820805 | 0.352626139 | 0.254043968 | -0.174776837 | 5.18E-12    | 6.85E-10    |
| EXON1 | USP54   | 10 | 75335352                            | 1 | cg12303623                                  | 0.56002716  | 0.400204194 | 0.346340677 | -0.213686483 | 1.34E-08    | 2.21E-07    |
| EXON1 | UTF1    | 10 | 135044114/135044040                 | 2 | cg09053680/cg09714379                       | 0.20498208  | 0.253523268 | 0.380217198 | 0.175235118  | 7.32E-05    | 0.00040047  |
| EXON1 | UTS2R   | 17 | 80332278/80333257/80333040          | 3 | cg12598178/cg19954017/cg24192805            | 0.480132765 | 0.556091644 | 0.678547882 | 0.198415117  | 5.39E-09    | 1.03E-07    |
| EXON1 | VAT1L   | 16 | 77822500/77822771                   | 2 | cg01256089/cg02761480                       | 0.105097593 | 0.179936416 | 0.274560032 | 0.169462439  | 0.001965622 | 0.007632291 |
| EXON1 | VAV3    | 1  | 108507340/108507468                 | 2 | cg16120828/cg24662718                       | 0.147082161 | 0.261738394 | 0.415378062 | 0.268295901  | 1.37E-06    | 1.18E-05    |
| EXON1 | VAX2    | 2  | 71127779/71127892                   | 2 | cg15579817/cg21637670                       | 0.197576615 | 0.19675699  | 0.417413989 | 0.219837374  | 0.000948719 | 0.00395918  |
| EXON1 | VCAM1   | 1  | 101185311                           | 1 | cg25762679                                  | 0.47501733  | 0.571155178 | 0.627295764 | 0.152278434  | 2.94E-06    | 2.30E-05    |
| EXON1 | VCAN    | 5  | 82767526/82767617                   | 2 | cg04525496/cg05176349                       | 0.132559309 | 0.18446299  | 0.343477828 | 0.210918519  | 2.62E-06    | 2.07E-05    |
| EXON1 | VEGFC   | 4  | 177713813/177713423                 | 2 | cg13378388/cg26301788                       | 0.270426783 | 0.300360647 | 0.449001314 | 0.178574531  | 9.27E-05    | 0.000494152 |
| EXON1 | VIPR2   | 7  | 158937610/158937494                 | 2 | cg03976877/cg13794530                       | 0.344609673 | 0.441673113 | 0.646611789 | 0.302002116  | 8.30E-13    | 2.39E-10    |
| EXON1 | VMO1    | 17 | 4689655/4689713/4689640             | 3 | cg08341874/cg21898424/cg27453857            | 0.352679173 | 0.399235657 | 0.510220052 | 0.157540878  | 8.10E-05    | 0.000438547 |
| EXON1 | VSTM2A  | 7  | 54610022/54610192/54610139/54610320 | 4 | cg02910208/cg03775422/cg04024095/cg14304469 | 0.27133063  | 0.342809737 | 0.472008952 | 0.200678322  | 2.41E-05    | 0.000148742 |
| EXON1 | VSTM2B  | 19 | 30017511                            | 1 | cg04711162                                  | 0.427465445 | 0.502654067 | 0.623896918 | 0.196431473  | 7.04E-10    | 1.99E-08    |
| EXON1 | VSTM2L  | 20 | 36531652                            | 1 | cg26366107                                  | 0.115763061 | 0.169990506 | 0.278770598 | 0.163007538  | 0.000469668 | 0.002107611 |

|       |        |    |                                                                       |   |                                                                              |             |             |             |              |             |             |
|-------|--------|----|-----------------------------------------------------------------------|---|------------------------------------------------------------------------------|-------------|-------------|-------------|--------------|-------------|-------------|
| EXON1 | VSX1   | 20 | 25062754/25062447                                                     | 2 | cg00043788/cg14763548                                                        | 0.309602228 | 0.34355494  | 0.553490257 | 0.24388803   | 3.61E-08    | 5.04E-07    |
| EXON1 | VSX2   | 14 | 74706196/74706336                                                     | 2 | cg07573727/cg11525285                                                        | 0.291580825 | 0.398279478 | 0.534100418 | 0.242519593  | 5.94E-08    | 7.61E-07    |
| EXON1 | VWC2   | 7  | 49813486                                                              | 1 | cg18206027                                                                   | 0.182120415 | 0.220693698 | 0.416763476 | 0.234643062  | 3.27E-06    | 2.54E-05    |
| EXON1 | WDR17  | 4  | 176987020/176987009/176987174                                         | 3 | cg08095852/cg11923920/cg27486637                                             | 0.094271628 | 0.242014108 | 0.383819349 | 0.289547722  | 1.67E-05    | 0.000107968 |
| EXON1 | WDR86  | 7  | 151106990                                                             | 1 | cg12433277                                                                   | 0.31276473  | 0.418221856 | 0.539497191 | 0.226732461  | 7.03E-07    | 6.51E-06    |
| EXON1 | WIPF3  | 7  | 29874354                                                              | 1 | cg14354418                                                                   | 0.71834715  | 0.688226222 | 0.554054345 | -0.164292805 | 6.18E-06    | 4.43E-05    |
| EXON1 | WISP3  | 6  | 112375302/112375333/112375324                                         | 3 | cg07709205/cg10525372/cg21773633                                             | 0.52809172  | 0.437901892 | 0.354784148 | -0.173307572 | 2.37E-11    | 1.95E-09    |
| EXON1 | WNT2   | 7  | 116963259/116963193                                                   | 2 | cg07697895/cg27331524                                                        | 0.269514918 | 0.365072882 | 0.541466436 | 0.271951519  | 9.01E-10    | 2.43E-08    |
| EXON1 | WTIP   | 19 | 34973341/34973191                                                     | 2 | cg15409931/cg24916013                                                        | 0.129627403 | 0.212062824 | 0.32917737  | 0.199549968  | 1.03E-06    | 9.19E-06    |
| EXON1 | XKR4   | 8  | 56015399/56015576/56015785/56015066/56015750                          | 5 | cg02509825/cg03751030/cg06868946/cg12751432/cg16939364                       | 0.35407659  | 0.367238825 | 0.507349858 | 0.153273268  | 6.37E-08    | 8.10E-07    |
| EXON1 | XKR6   | 8  | 11058710/11058145/11058770/11058690/11058395                          | 5 | cg10947146/cg11051055/cg15301489/cg24664689/cg27487839                       | 0.107823541 | 0.165539226 | 0.307550126 | 0.199726585  | 0.000200296 | 0.000989071 |
| EXON1 | ZFHX4  | 8  | 77593623                                                              | 1 | cg07585876                                                                   | 0.209150756 | 0.269712738 | 0.490332389 | 0.281181633  | 7.69E-05    | 0.000418614 |
| EXON1 | ZFP28  | 19 | 57050370/57050367/57050359                                            | 3 | cg21970554/cg22054362/cg24152605                                             | 0.279058381 | 0.324144566 | 0.470186472 | 0.191128091  | 0.000719048 | 0.003080403 |
| EXON1 | ZFP57  | 6  | 29644756                                                              | 1 | cg12463578                                                                   | 0.413040475 | 0.281781067 | 0.22202345  | -0.191017025 | 1.97E-09    | 4.43E-08    |
| EXON1 | ZFP82  | 19 | 36909413/36909418                                                     | 2 | cg24724633/cg25886284                                                        | 0.162126202 | 0.374580514 | 0.543410133 | 0.381283931  | 2.69E-08    | 3.97E-07    |
| EXON1 | ZG16B  | 16 | 2880326                                                               | 1 | cg02558476                                                                   | 0.351762275 | 0.267562544 | 0.199170775 | -0.1525915   | 5.03E-11    | 3.15E-09    |
| EXON1 | ZIC1   | 3  | 147128679/147127579/147127662/147127193/147128157/147128123/147127898 | 7 | cg01458605/cg01610632/cg04738965/cg05073035/cg05371578/cg12595013/cg26375057 | 0.432710412 | 0.491087474 | 0.625479803 | 0.19276939   | 6.87E-10    | 1.95E-08    |
| EXON1 | ZIK1   | 19 | 58095659                                                              | 1 | cg26246807                                                                   | 0.375614655 | 0.597706644 | 0.758164927 | 0.382550272  | 1.78E-10    | 7.14E-09    |
| EXON1 | ZNF132 | 19 | 58951434                                                              | 1 | cg19776201                                                                   | 0.121933814 | 0.220579396 | 0.34146989  | 0.219536076  | 8.65E-05    | 0.00046446  |
| EXON1 | ZNF134 | 19 | 58125867                                                              | 1 | cg18113994                                                                   | 0.069991208 | 0.193658918 | 0.288664563 | 0.218673356  | 0.000268342 | 0.001276942 |
| EXON1 | ZNF154 | 19 | 58220370/58220494/58220516                                            | 3 | cg05661282/cg21790626/cg27049766                                             | 0.477791493 | 0.60086215  | 0.697451393 | 0.219659901  | 1.32E-09    | 3.20E-08    |
| EXON1 | ZNF167 | 3  | 44596770                                                              | 1 | cg25805709                                                                   | 0.093279883 | 0.206520921 | 0.270121228 | 0.176841345  | 0.00706351  | 0.02384982  |

|       |         |    |                                                                                           |    |                                                                                                               |             |             |             |              |             |             |
|-------|---------|----|-------------------------------------------------------------------------------------------|----|---------------------------------------------------------------------------------------------------------------|-------------|-------------|-------------|--------------|-------------|-------------|
| EXON1 | ZNF177  | 19 | 9473696/9473715                                                                           | 2  | cg09643544/cg12089570                                                                                         | 0.44713019  | 0.535981542 | 0.648741052 | 0.201610862  | 1.56E-10    | 6.60E-09    |
| EXON1 | ZNF208  | 19 | 22193724                                                                                  | 1  | cg26938561                                                                                                    | 0.51009076  | 0.573753211 | 0.687665023 | 0.177574263  | 2.48E-11    | 1.98E-09    |
| EXON1 | ZNF229  | 19 | 44952618/44952572/44952604                                                                | 3  | cg13498858/cg17904997/cg19375479                                                                              | 0.209783132 | 0.319397329 | 0.421844632 | 0.2120615    | 8.90E-06    | 6.15E-05    |
| EXON1 | ZNF256  | 19 | 58458917/58458979                                                                         | 2  | cg14556070/cg20176532                                                                                         | 0.177109025 | 0.217259773 | 0.435286696 | 0.258177672  | 3.65E-05    | 0.000215014 |
| EXON1 | ZNF257  | 19 | 22235281/22235272/22235409                                                                | 3  | cg02912127/cg24072202/cg25514554                                                                              | 0.40164807  | 0.510587817 | 0.599723843 | 0.198075773  | 4.12E-10    | 1.30E-08    |
| EXON1 | ZNF264  | 19 | 57702917/57703301/57702927/57703144/57702994                                              | 5  | cg08504049/cg11140785/cg22307908/cg23257840/cg24150232                                                        | 0.058423139 | 0.122947295 | 0.293788536 | 0.235365398  | 0.000252406 | 0.001208062 |
| EXON1 | ZNF280A | 22 | 22874447/22874590                                                                         | 2  | cg08088989/cg20403031                                                                                         | 0.670706765 | 0.544298861 | 0.4968019   | -0.173904865 | 2.72E-05    | 0.000165227 |
| EXON1 | ZNF304  | 19 | 57863057/57862713                                                                         | 2  | cg04685743/cg07494047                                                                                         | 0.084922142 | 0.236218978 | 0.429114705 | 0.344192563  | 2.47E-07    | 2.62E-06    |
| EXON1 | ZNF311  | 6  | 28972891/28972937/28972975/28972876/28972963                                              | 5  | cg12064504/cg12244205/cg14102966/cg15810199/cg18305433                                                        | 0.639864042 | 0.531427548 | 0.457415673 | -0.182448369 | 2.37E-07    | 2.52E-06    |
| EXON1 | ZNF331  | 19 | 54041398/54024806/54024649/54024834/54024744/54024323/54024182/54024435/54058767/54024430 | 10 | cg05338009/cg06551490/cg09918296/cg10359230/cg10851698/cg15205507/cg16969623/cg17352157/cg19006302/cg25538376 | 0.319344545 | 0.402036101 | 0.517971536 | 0.19862699   | 3.73E-10    | 1.21E-08    |
| EXON1 | ZNF334  | 20 | 45142065/45141911                                                                         | 2  | cg01471196/cg10705541                                                                                         | 0.4193698   | 0.539774567 | 0.641194845 | 0.221825045  | 8.54E-09    | 1.52E-07    |
| EXON1 | ZNF347  | 19 | 53662261                                                                                  | 1  | cg15038664                                                                                                    | 0.083548618 | 0.1557514   | 0.332093959 | 0.248545341  | 0.000345753 | 0.001601531 |
| EXON1 | ZNF385D | 3  | 21792684/21792434/21792543                                                                | 3  | cg00485194/cg18267381/cg18503679                                                                              | 0.322803982 | 0.428720288 | 0.56774422  | 0.244940238  | 1.32E-09    | 3.20E-08    |
| EXON1 | ZNF415  | 19 | 53636077/53636108                                                                         | 2  | cg10332700/cg15202738                                                                                         | 0.119376933 | 0.222854366 | 0.322519575 | 0.203142642  | 0.001037438 | 0.004282143 |
| EXON1 | ZNF418  | 19 | 58446600/58446669                                                                         | 2  | cg07474494/cg11998703                                                                                         | 0.36820772  | 0.488271678 | 0.607748914 | 0.239541194  | 1.43E-08    | 2.32E-07    |
| EXON1 | ZNF454  | 5  | 178368253                                                                                 | 1  | cg17840719                                                                                                    | 0.645646885 | 0.7032895   | 0.838915886 | 0.193269001  | 5.82E-11    | 3.47E-09    |
| EXON1 | ZNF460  | 19 | 57792200/57791959/57791887                                                                | 3  | cg17412580/cg23255774/cg25549230                                                                              | 0.102977625 | 0.197412435 | 0.256368278 | 0.153390654  | 1.20E-06    | 1.05E-05    |
| EXON1 | ZNF471  | 19 | 57019279                                                                                  | 1  | cg19358877                                                                                                    | 0.320278515 | 0.361112144 | 0.575129291 | 0.254850776  | 0.000274435 | 0.001303592 |
| EXON1 | ZNF492  | 19 | 22817176                                                                                  | 1  | cg03230154                                                                                                    | 0.249439945 | 0.350137439 | 0.5459557   | 0.296515755  | 4.46E-09    | 8.81E-08    |

|       |         |    |                                                       |   |                                                                   |             |             |             |             |             |             |
|-------|---------|----|-------------------------------------------------------|---|-------------------------------------------------------------------|-------------|-------------|-------------|-------------|-------------|-------------|
| EXON1 | ZNF540  | 19 | 38042472/38042418                                     | 2 | cg03975694/cg15415136                                             | 0.452827885 | 0.531260714 | 0.635684148 | 0.182856263 | 2.57E-08    | 3.81E-07    |
| EXON1 | ZNF543  | 19 | 57832235/57831909                                     | 2 | cg02798548/cg04696193                                             | 0.090497869 | 0.197819797 | 0.282008214 | 0.191510345 | 0.000735246 | 0.003141656 |
| EXON1 | ZNF544  | 19 | 58740253/58740255                                     | 2 | cg21155461/cg21747958                                             | 0.025687876 | 0.087893725 | 0.236233864 | 0.210545988 | 0.002518441 | 0.009478368 |
| EXON1 | ZNF549  | 19 | 58038856/58038742                                     | 2 | cg07054095/cg13644629                                             | 0.160202411 | 0.300530641 | 0.464759873 | 0.304557462 | 5.76E-09    | 1.09E-07    |
| EXON1 | ZNF568  | 19 | 37407284/37407374/37407462/37407486/37407257/37407413 | 6 | cg02459604/cg03060201/cg03443751/cg20154403/cg21761844/cg26612849 | 0.133586251 | 0.276222588 | 0.414501024 | 0.280914773 | 5.42E-05    | 0.000307366 |
| EXON1 | ZNF569  | 19 | 37957997/37957995                                     | 2 | cg03884783/cg14142713                                             | 0.057391128 | 0.079105674 | 0.227363062 | 0.169971934 | 0.001800009 | 0.007055503 |
| EXON1 | ZNF578  | 19 | 52956832                                              | 1 | cg25763393                                                        | 0.48121531  | 0.540438578 | 0.650774995 | 0.169559685 | 3.28E-10    | 1.11E-08    |
| EXON1 | ZNF586  | 19 | 58281117                                              | 1 | cg22956410                                                        | 0.104819689 | 0.117110548 | 0.328906385 | 0.224086697 | 0.001471101 | 0.00587774  |
| EXON1 | ZNF606  | 19 | 58514694/58514497                                     | 2 | cg12259537/cg25480379                                             | 0.4771288   | 0.5724297   | 0.663777841 | 0.186649041 | 3.34E-09    | 6.85E-08    |
| EXON1 | ZNF625  | 19 | 12267464                                              | 1 | cg17892556                                                        | 0.184477883 | 0.425167174 | 0.539363618 | 0.354885736 | 1.95E-06    | 1.60E-05    |
| EXON1 | ZNF660  | 3  | 44626492                                              | 1 | cg22598028                                                        | 0.205992665 | 0.316678834 | 0.524859862 | 0.318867197 | 8.15E-07    | 7.41E-06    |
| EXON1 | ZNF667  | 19 | 56988702                                              | 1 | cg24732137                                                        | 0.349056805 | 0.418095594 | 0.523384273 | 0.174327468 | 7.18E-09    | 1.31E-07    |
| EXON1 | ZNF671  | 19 | 58238987/58238850/58238928                            | 3 | cg11977686/cg12074025/cg19246110                                  | 0.284639445 | 0.427167596 | 0.614744311 | 0.330104865 | 1.96E-08    | 2.99E-07    |
| EXON1 | ZNF75A  | 16 | 3355553                                               | 1 | cg05540369                                                        | 0.223151031 | 0.339592739 | 0.496508255 | 0.273357224 | 1.39E-08    | 2.27E-07    |
| EXON1 | ZNF772  | 19 | 57988860                                              | 1 | cg26929012                                                        | 0.085492994 | 0.170699922 | 0.28206878  | 0.196575786 | 1.47E-05    | 9.66E-05    |
| EXON1 | ZNF773  | 19 | 58011393/58011309/58011345                            | 3 | cg00757182/cg09555914/cg22806837                                  | 0.039144991 | 0.141414265 | 0.224253849 | 0.185108858 | 0.000296824 | 0.001397397 |
| EXON1 | ZNF781  | 19 | 38183130/38183210/38183055                            | 3 | cg04784475/cg22521696/cg25875213                                  | 0.094544436 | 0.145204896 | 0.307763135 | 0.213218699 | 0.000261787 | 0.001249793 |
| EXON1 | ZNF793  | 19 | 37997867                                              | 1 | cg15139588                                                        | 0.098841377 | 0.255724284 | 0.475644413 | 0.376803036 | 7.56E-07    | 6.94E-06    |
| EXON1 | ZNF804A | 2  | 185463132/185463209/185463583/185463588/185463218     | 5 | cg00554682/cg13107760/cg13536757/cg16573328/cg21245277            | 0.093647484 | 0.124077633 | 0.269781843 | 0.176134359 | 0.000321392 | 0.001499716 |
| EXON1 | ZNF813  | 19 | 53971035                                              | 1 | cg12142445                                                        | 0.11934244  | 0.204465153 | 0.378819685 | 0.259477245 | 4.20E-05    | 0.00024349  |
| EXON1 | ZNF814  | 19 | 58400325/58400275                                     | 2 | cg15759937/cg24124798                                             | 0.218604415 | 0.327995989 | 0.5074221   | 0.288817685 | 5.60E-07    | 5.30E-06    |
| EXON1 | ZNF829  | 19 | 37407060/37407041/37407152/37406932/37406949/37407123 | 6 | cg02370417/cg03584288/cg15322783/cg15746891/cg21292152/cg24052101 | 0.134895251 | 0.273031172 | 0.385681899 | 0.250786648 | 5.63E-05    | 0.000317351 |
| EXON1 | ZNF880  | 19 | 52873173                                              | 1 | cg03005603                                                        | 0.264131695 | 0.347941017 | 0.448765031 | 0.184633336 | 0.00027543  | 0.001307847 |

|          |         |    |                                                                                                 |    |                                                                                                                                       |             |             |             |              |          |             |
|----------|---------|----|-------------------------------------------------------------------------------------------------|----|---------------------------------------------------------------------------------------------------------------------------------------|-------------|-------------|-------------|--------------|----------|-------------|
| EXON1    | ZP4     | 1  | 238053828                                                                                       | 1  | cg03872376                                                                                                                            | 0.62503481  | 0.542928461 | 0.428492859 | -0.196541951 | 8.32E-08 | 1.03E-06    |
| EXON1    | ZSCAN18 | 19 | 58609473/5862971<br>9/58609361/586096<br>18/58609602                                            | 5  | cg06243556/cg10659<br>886/cg21653184/cg2<br>2721334/cg25784220                                                                        | 0.387147531 | 0.451577266 | 0.552968708 | 0.165821178  | 2.33E-05 | 0.000144412 |
| EXON1    | ZSCAN23 | 6  | 28411271/2841124<br>0                                                                           | 2  | cg06818710/cg13525<br>197                                                                                                             | 0.218626205 | 0.290955486 | 0.471140323 | 0.252514118  | 4.50E-07 | 4.37E-06    |
| EXON1    | ZSCAN5B | 19 | 56704341                                                                                        | 1  | cg18591235                                                                                                                            | 0.747912715 | 0.6750543   | 0.580162764 | -0.167749951 | 1.37E-05 | 9.05E-05    |
| EXON1    | ZYG11A  | 1  | 53308597                                                                                        | 1  | cg16015712                                                                                                                            | 0.2988786   | 0.42913595  | 0.527121636 | 0.228243036  | 4.16E-05 | 0.000241805 |
| GENEBODY | SEPT14  | 7  | 55902220/5587462<br>4                                                                           | 2  | cg08489623/cg17007<br>389                                                                                                             | 0.701087255 | 0.602111194 | 0.539044618 | -0.162042637 | 1.05E-07 | 6.54E-07    |
| GENEBODY | A2M     | 12 | 9231867/9227195/9<br>265989/9227173/92<br>65053/9225334/926<br>5030/9227320/9227<br>237/9227209 | 10 | cg00141925/cg08012<br>045/cg08300930/cg1<br>1139127/cg12187098<br>/cg12417807/cg1568<br>8197/cg16314263/cg<br>26665904/cg2716670<br>7 | 0.724781899 | 0.635538197 | 0.564690158 | -0.16009174  | 2.34E-09 | 2.73E-08    |
| GENEBODY | A2ML1   | 12 | 8995660/8994648/8<br>994672/9019044/89<br>95557/8995808/898<br>6988/8995965/8995<br>591/8975309 | 10 | cg03314100/cg04884<br>118/cg05589691/cg1<br>1641391/cg13209739<br>/cg15384867/cg2141<br>6544/cg24309769/cg<br>27629124/cg2765313<br>4 | 0.70627356  | 0.605035131 | 0.520051112 | -0.186222448 | 3.99E-11 | 1.32E-09    |
| GENEBODY | ABCA8   | 17 | 66925642/6692651<br>3/66905630                                                                  | 3  | cg17334372/cg17461<br>670/cg20561863                                                                                                  | 0.372540965 | 0.264106356 | 0.175743455 | -0.19679751  | 1.79E-10 | 3.73E-09    |
| GENEBODY | ABCC13  | 21 | 15647368/1564618<br>7/15646635/156463<br>12                                                     | 4  | cg01335663/cg05202<br>042/cg11429658/cg1<br>2162424                                                                                   | 0.59325333  | 0.516750706 | 0.441786923 | -0.151466407 | 3.97E-08 | 2.83E-07    |
| GENEBODY | ABCD2   | 12 | 39981136                                                                                        | 1  | cg13406085                                                                                                                            | 0.717780775 | 0.565277444 | 0.388307936 | -0.329472839 | 2.09E-12 | 2.35E-10    |
| GENEBODY | ABHD1   | 2  | 27346938/2734922<br>0                                                                           | 2  | cg03315230/cg17345<br>276                                                                                                             | 0.531101125 | 0.411027406 | 0.331153189 | -0.199947936 | 8.02E-12 | 4.83E-10    |
| GENEBODY | ACSM5   | 16 | 20429506                                                                                        | 1  | cg27514874                                                                                                                            | 0.76220994  | 0.691020928 | 0.610951877 | -0.151258063 | 3.02E-05 | 9.91E-05    |
| GENEBODY | ACTA1   | 1  | 229568077/229567<br>560/229568252/229<br>567914/229568360/ 7<br>229568467/229567<br>626         | 7  | cg00034468/cg02970<br>384/cg04568492/cg0<br>5353133/cg11668749<br>/cg12341314/cg2410<br>4241                                          | 0.417363278 | 0.493218573 | 0.628459703 | 0.211096426  | 3.66E-10 | 6.27E-09    |
| GENEBODY | ACY3    | 11 | 67414373                                                                                        | 1  | cg23879118                                                                                                                            | 0.339937625 | 0.226226498 | 0.17070377  | -0.169233855 | 2.21E-08 | 1.72E-07    |



|          |          |    |                                                                                                                                                                                                                                          |    |                                                                                                                                                                                                                                                                                          |             |             |             |              |          |          |
|----------|----------|----|------------------------------------------------------------------------------------------------------------------------------------------------------------------------------------------------------------------------------------------|----|------------------------------------------------------------------------------------------------------------------------------------------------------------------------------------------------------------------------------------------------------------------------------------------|-------------|-------------|-------------|--------------|----------|----------|
| GENEBODY | ADAD1    | 4  | 123301310/123304<br>626/123326231/123<br>301256                                                                                                                                                                                          | 4  | cg16264330/cg17139<br>861/cg20603162/cg2<br>2162821                                                                                                                                                                                                                                      | 0.576242355 | 0.491466206 | 0.385902736 | -0.190339619 | 1.33E-11 | 6.59E-10 |
| GENEBODY | ADAMTS12 | 5  | 33890324/3373793<br>6/33842297/336590<br>84/33852528/33835<br>713/33788976/3379<br>4720/33889461/336<br>49717/33772916/33<br>758285/33822930/3<br>3807278/33832949/<br>33855241/3372700<br>7/33764247/335639<br>27/33809376/33698<br>653 | 21 | cg01990593/cg03592<br>903/cg04578894/cg0<br>6448603/cg06893139<br>/cg07043044/cg0770<br>0393/cg07784793/cg<br>08768395/cg1059454<br>3/cg10627511/cg129<br>17072/cg14827469/c<br>g15833353/cg196417<br>47/cg21569398/cg21<br>874902/cg23359363/<br>cg24777564/cg26077<br>446/ch.5.731560F | 0.593019341 | 0.505387449 | 0.436439844 | -0.156579497 | 8.34E-11 | 2.13E-09 |
| GENEBODY | ADCYAP1  | 18 | 908130/908745/907<br>092/905450/906224<br>/909086/908505/90<br>8396/909154/90760<br>5/905611/906020/9<br>08290/906726                                                                                                                    | 14 | cg00067606/cg04105<br>966/cg06372303/cg0<br>7376535/cg07788286<br>/cg10384245/cg1140<br>2363/cg11771234/cg<br>11859607/cg1394069<br>3/cg14489474/cg174<br>39660/cg21331088/c<br>g22374233                                                                                                | 0.319629228 | 0.409173016 | 0.550701367 | 0.23107214   | 1.63E-09 | 2.01E-08 |
| GENEBODY | ADD2     | 2  | 70932722/7093332<br>6/70933416/709038<br>03/70933502/70931<br>257/70915210                                                                                                                                                               | 7  | cg02674324/cg06752<br>779/cg09364770/cg1<br>3284981/cg13998281<br>/cg17075459/cg1806<br>7420                                                                                                                                                                                             | 0.685027895 | 0.609449547 | 0.519611965 | -0.16541593  | 2.32E-10 | 4.53E-09 |
| GENEBODY | ADORA2A  | 22 | 24829716/2482946<br>2                                                                                                                                                                                                                    | 2  | cg19855777/cg21584<br>430                                                                                                                                                                                                                                                                | 0.68218459  | 0.5944658   | 0.523996377 | -0.158188213 | 4.04E-11 | 1.33E-09 |
| GENEBODY | ADRA1A   | 8  | 26717875/2672007<br>6/26688088/266274<br>54/26681894/26614<br>263/26720681/2668<br>7962                                                                                                                                                  | 8  | cg02501086/cg02776<br>627/cg07572251/cg1<br>0241718/cg14825340<br>/cg16895486/cg2328<br>9779/cg23328194                                                                                                                                                                                  | 0.614074213 | 0.544911369 | 0.454862399 | -0.159211814 | 1.79E-10 | 3.73E-09 |
| GENEBODY | AGR2     | 7  | 16841311                                                                                                                                                                                                                                 | 1  | cg25343204                                                                                                                                                                                                                                                                               | 0.59904114  | 0.490179217 | 0.366087627 | -0.232953513 | 3.57E-09 | 3.81E-08 |
| GENEBODY | AKR7L    | 1  | 19596472/1959951<br>6/19600141                                                                                                                                                                                                           | 3  | cg03985478/cg17431<br>922/cg23625458                                                                                                                                                                                                                                                     | 0.701048328 | 0.59951272  | 0.541531723 | -0.159516606 | 5.17E-06 | 2.03E-05 |

|          |          |    |                                                                                                                                                                                          |                                                                                                                                                                                                          |             |             |             |              |          |          |
|----------|----------|----|------------------------------------------------------------------------------------------------------------------------------------------------------------------------------------------|----------------------------------------------------------------------------------------------------------------------------------------------------------------------------------------------------------|-------------|-------------|-------------|--------------|----------|----------|
| GENEBODY | AKT3     | 1  | 243723585/243877<br>024/244006288/244<br>006397/244004889/<br>243670224/243754<br>323/243904118/243 15<br>663227/243877447/<br>243902978/243712<br>954/243736307/243<br>967381/243869070 | cg02288831/cg04221<br>461/cg11314684/cg1<br>1496569/cg11973514<br>/cg13396060/cg1560<br>4398/cg15962538/cg<br>16404569/cg1713304<br>5/cg20686125/cg226<br>29515/cg24455383/c<br>g24739596/cg274386<br>90 | 0.682528058 | 0.600768571 | 0.5141943   | -0.168333758 | 3.71E-13 | 8.58E-11 |
| GENEBODY | ALDOA    | 16 | 30080799/3007912 2<br>1                                                                                                                                                                  | cg01667953/cg26519<br>342                                                                                                                                                                                | 0.737584385 | 0.646764039 | 0.550730859 | -0.186853526 | 1.28E-06 | 5.96E-06 |
| GENEBODY | ANKDD1A  | 15 | 65204391/6521416<br>5/65239308/652140<br>75/65204428/65223 9<br>141/65204370/6521<br>4588/65207109                                                                                       | cg00958451/cg01497<br>527/cg02539274/cg0<br>3775123/cg05527113<br>/cg09291474/cg1009<br>7464/cg12119988/cg<br>21153004                                                                                   | 0.611957014 | 0.527110344 | 0.444063916 | -0.167893098 | 8.25E-11 | 2.11E-09 |
| GENEBODY | ANXA2    | 15 | 60689285/6065469<br>3/60688010/606896<br>70/60644157/60683<br>059/60687284/6069 15<br>0026/60688948/606<br>62488/60664570/60<br>689852/60688622/6<br>0666575/60673898                    | cg02072495/cg03957<br>109/cg06738887/cg0<br>9533293/cg09785377<br>/cg11681321/cg1331<br>3836/cg13634501/cg<br>14397690/cg1789377<br>5/cg21711008/cg222<br>93140/cg22365276/c<br>g22581200/cg255159<br>97 | 0.553756335 | 0.469198306 | 0.39381976  | -0.159936574 | 6.17E-12 | 4.14E-10 |
| GENEBODY | AOC2     | 17 | 41001944/4100184 2<br>9                                                                                                                                                                  | cg16048817/cg22530<br>519                                                                                                                                                                                | 0.5593076   | 0.45642565  | 0.385593986 | -0.173713614 | 1.03E-10 | 2.48E-09 |
| GENEBODY | APOBEC3H | 22 | 39496387 1                                                                                                                                                                               | cg17972162                                                                                                                                                                                               | 0.544766345 | 0.466363289 | 0.372024159 | -0.172742186 | 2.77E-10 | 5.12E-09 |
| GENEBODY | APOC1P1  | 19 | 45430113 1                                                                                                                                                                               | cg24084606                                                                                                                                                                                               | 0.640969445 | 0.579160056 | 0.486872786 | -0.154096659 | 4.93E-07 | 2.57E-06 |
| GENEBODY | APOH     | 17 | 64225346 1                                                                                                                                                                               | cg17095279                                                                                                                                                                                               | 0.621719185 | 0.494591128 | 0.393896214 | -0.227822971 | 3.60E-11 | 1.24E-09 |
| GENEBODY | APOL5    | 22 | 36123779 1                                                                                                                                                                               | cg25036527                                                                                                                                                                                               | 0.61314906  | 0.455815106 | 0.348639441 | -0.264509619 | 5.92E-11 | 1.69E-09 |

|          |          |    |                                                                                                                                                                                                                                                                                              |                                                                                                                                                                                                                                                                                                                  |             |             |             |              |          |          |
|----------|----------|----|----------------------------------------------------------------------------------------------------------------------------------------------------------------------------------------------------------------------------------------------------------------------------------------------|------------------------------------------------------------------------------------------------------------------------------------------------------------------------------------------------------------------------------------------------------------------------------------------------------------------|-------------|-------------|-------------|--------------|----------|----------|
| GENEBODY | APP      | 21 | 27540106/2754274<br>9/27372396/275418<br>94/27542843/27538<br>021/27372461/2754 13<br>0728/27540220/273<br>72446/27372387/27<br>354743/27297434                                                                                                                                              | cg01286133/cg10129<br>201/cg11321156/cg1<br>2144476/cg13169373<br>/cg14414154/cg1827<br>4664/cg18597421/cg<br>19788250/cg2326969<br>2/cg24168308/cg253<br>14245/ch.21.228978R                                                                                                                                    | 0.539598548 | 0.447073257 | 0.385659041 | -0.153939506 | 9.85E-13 | 1.45E-10 |
| GENEBODY | ARHGAP15 | 2  | 144223682/144246<br>478/144462886/144<br>359756/144282743/<br>144500981/144503<br>739/144501227/144<br>303521/144448686/<br>143927903/144271 23<br>431/144477916/144<br>053418/144234430/<br>144515038/144105<br>257/144486573/143<br>987421/143999025/<br>144099197/144498<br>168/144519856 | cg00016324/cg00859<br>755/cg05307752/cg0<br>7211155/cg07409629<br>/cg07539108/cg0762<br>1645/cg08820401/cg<br>11310863/cg1205838<br>5/cg14851140/cg170<br>56048/cg17592268/c<br>g17600630/cg198679<br>14/cg21291880/cg21<br>338523/cg21339799/<br>cg22922100/cg23498<br>755/cg25026949/cg2<br>7455061/cg27492839 | 0.732609214 | 0.645983516 | 0.565320411 | -0.167288803 | 3.99E-10 | 6.72E-09 |
| GENEBODY | ARL5C    | 17 | 37318180/3732149<br>0/37321890/373216 5<br>31/37321201                                                                                                                                                                                                                                       | cg11090211/cg15790<br>037/cg16202734/cg2<br>0555674/cg26465214                                                                                                                                                                                                                                                   | 0.329569929 | 0.415841338 | 0.486067192 | 0.156497263  | 9.70E-08 | 6.13E-07 |
| GENEBODY | ARRDC5   | 19 | 4891238/4891420/4<br>894976/4902576/48 7<br>91192/4891471/489<br>1305                                                                                                                                                                                                                        | cg07755245/cg08364<br>410/cg08873568/cg1<br>0031203/cg16117653<br>/cg18859211/cg2023<br>0308                                                                                                                                                                                                                     | 0.808635148 | 0.716852569 | 0.597540458 | -0.211094691 | 2.68E-10 | 5.00E-09 |
| GENEBODY | ASB17    | 1  | 76396165/7639784 2<br>7                                                                                                                                                                                                                                                                      | cg15990658/cg17041<br>296                                                                                                                                                                                                                                                                                        | 0.736653898 | 0.680856442 | 0.547862298 | -0.1887916   | 2.95E-07 | 1.63E-06 |
| GENEBODY | ASCC2    | 22 | 30195299                                                                                                                                                                                                                                                                                     | cg14742445                                                                                                                                                                                                                                                                                                       | 0.623584125 | 0.427142461 | 0.297950882 | -0.325633243 | 5.71E-14 | 3.80E-11 |
| GENEBODY | ASCL3    | 11 | 8959438                                                                                                                                                                                                                                                                                      | cg14711859                                                                                                                                                                                                                                                                                                       | 0.801660675 | 0.6463918   | 0.528616877 | -0.273043798 | 1.08E-09 | 1.43E-08 |
| GENEBODY | ATP13A5  | 3  | 193078051/193066 3<br>097/193096009                                                                                                                                                                                                                                                          | cg20118157/cg24671<br>330/cg25013044                                                                                                                                                                                                                                                                             | 0.80682305  | 0.735072519 | 0.652345489 | -0.154477561 | 3.95E-09 | 4.14E-08 |

|          |          |    |                                                                                                                                                                                                                |    |                                                                                                                                                                                                                                                              |             |             |             |              |          |          |
|----------|----------|----|----------------------------------------------------------------------------------------------------------------------------------------------------------------------------------------------------------------|----|--------------------------------------------------------------------------------------------------------------------------------------------------------------------------------------------------------------------------------------------------------------|-------------|-------------|-------------|--------------|----------|----------|
| GENEBODY | ATP1B2   | 17 | 7555322/7555132/7559144/7555411/7558889/7559041/7555298                                                                                                                                                        | 7  | cg05070518/cg08581937/cg16991298/cg17379325/cg19178081/cg20682573/cg22237200                                                                                                                                                                                 | 0.353785818 | 0.398109056 | 0.51723176  | 0.163445942  | 1.54E-05 | 5.37E-05 |
| GENEBODY | ATP6AP1L | 5  | 81608485                                                                                                                                                                                                       | 1  | cg07807695                                                                                                                                                                                                                                                   | 0.621896035 | 0.474271061 | 0.403411523 | -0.218484512 | 7.68E-11 | 2.00E-09 |
| GENEBODY | ATP6V1G3 | 1  | 198509669                                                                                                                                                                                                      | 1  | cg12958813                                                                                                                                                                                                                                                   | 0.820138695 | 0.625598444 | 0.495645964 | -0.324492731 | 2.74E-09 | 3.08E-08 |
| GENEBODY | AXIN2    | 17 | 63537711/63532630/63530270/63534625/63553581/63530161/63535223/63554468/63532898/63550766/63534470/63533778/63535567/63554536/63533152/63534340/63549322/63549924/63545705/63527924/63543769/63534688/63533303 | 23 | cg01434611/cg01982533/cg02161011/cg04239967/cg04293307/cg06136432/cg06405341/cg06875131/cg08005093/cg09119854/cg09231741/cg10965669/cg11096905/cg11122009/cg12255061/cg18956355/cg19949591/cg22809682/cg23011419/cg23475474/cg25661571/cg26921093/cg27527595 | 0.660607046 | 0.52527306  | 0.445998522 | -0.214608523 | 6.73E-14 | 4.17E-11 |
| GENEBODY | AZU1     | 19 | 828170/831456                                                                                                                                                                                                  | 2  | cg17823175/cg24165638                                                                                                                                                                                                                                        | 0.596399873 | 0.504322528 | 0.428856182 | -0.167543691 | 4.43E-13 | 9.38E-11 |
| GENEBODY | B3GNT5   | 3  | 182987901                                                                                                                                                                                                      | 1  | cg16262284                                                                                                                                                                                                                                                   | 0.67505214  | 0.527117333 | 0.415287586 | -0.259764554 | 2.23E-13 | 6.76E-11 |
| GENEBODY | BBOX1    | 11 | 27145585/27097023/27105814                                                                                                                                                                                     | 3  | cg03058733/cg06847828/cg24585203                                                                                                                                                                                                                             | 0.628308817 | 0.541562856 | 0.476988902 | -0.151319915 | 2.14E-06 | 9.29E-06 |
| GENEBODY | BCAR4    | 16 | 11922606                                                                                                                                                                                                       | 1  | cg05694761                                                                                                                                                                                                                                                   | 0.871228205 | 0.798105094 | 0.682879855 | -0.18834835  | 1.41E-04 | 3.99E-04 |
| GENEBODY | BCL2L15  | 1  | 114429815                                                                                                                                                                                                      | 1  | cg12486521                                                                                                                                                                                                                                                   | 0.62545038  | 0.505361367 | 0.404165823 | -0.221284557 | 8.98E-11 | 2.24E-09 |
| GENEBODY | BIK      | 22 | 43523016/43523322                                                                                                                                                                                              | 2  | cg02601893/cg03015585                                                                                                                                                                                                                                        | 0.540223563 | 0.434473208 | 0.357581439 | -0.182642124 | 6.28E-12 | 4.17E-10 |
| GENEBODY | BNC1     | 15 | 83951913/83952345/83952774/83952875/83953068/83952019/83951663/83952722/83951732/83952508/83949772/83952808/83952420                                                                                           | 13 | cg00222341/cg02318926/cg04090392/cg07639720/cg08939095/cg10398682/cg12250049/cg14431006/cg15736165/cg17051321/cg17151123/cg19988449/cg23989963                                                                                                               | 0.336788053 | 0.436541103 | 0.568156758 | 0.231368705  | 5.14E-11 | 1.55E-09 |
| GENEBODY | BNIP1    | 1  | 151019134/151009588                                                                                                                                                                                            | 2  | cg04244851/cg11584936                                                                                                                                                                                                                                        | 0.86080939  | 0.759247922 | 0.646079755 | -0.214729635 | 1.82E-06 | 8.04E-06 |

|          |          |    |                                                                                                               |    |                                                                                                                          |             |             |             |              |             |             |
|----------|----------|----|---------------------------------------------------------------------------------------------------------------|----|--------------------------------------------------------------------------------------------------------------------------|-------------|-------------|-------------|--------------|-------------|-------------|
| GENEBODY | BPI      | 20 | 36933189                                                                                                      | 1  | cg08254089                                                                                                               | 0.48949337  | 0.339998589 | 0.210791691 | -0.278701679 | 5.96E-13    | 1.10E-10    |
| GENEBODY | BPIL3    | 20 | 31619647                                                                                                      | 1  | cg18223379                                                                                                               | 0.690191385 | 0.52916155  | 0.452184077 | -0.238007308 | 6.80E-08    | 4.50E-07    |
| GENEBODY | BSX      | 11 | 122851122/122848983/122849037/122850545/122850972/122848518/122850522/122850140/122850741/122850227/122850490 | 11 | cg00408348/cg02851062/cg03812107/cg06191454/cg11718501/cg12114834/cg15503722/cg16808373/cg17121178/cg22289581/cg24719321 | 0.371464051 | 0.477866572 | 0.617852922 | 0.24638887   | 3.54E-10    | 6.15E-09    |
| GENEBODY | BTF3L1   | 13 | 77502805                                                                                                      | 1  | cg01665118                                                                                                               | 0.446121545 | 0.319807511 | 0.243037727 | -0.203083818 | 1.56E-11    | 7.32E-10    |
| GENEBODY | BTG3     | 21 | 18980308                                                                                                      | 1  | cg08875503                                                                                                               | 0.56439063  | 0.466887072 | 0.366370541 | -0.198020089 | 3.26E-10    | 5.77E-09    |
| GENEBODY | BTG4     | 11 | 111364291                                                                                                     | 1  | cg23756005                                                                                                               | 0.600384555 | 0.465027928 | 0.357941832 | -0.242442723 | 9.96E-12    | 5.39E-10    |
| GENEBODY | C10orf50 | 10 | 26883013/26883079/26883165/26881860                                                                           | 4  | cg22822446/cg23318538/cg23378142/cg25037043                                                                              | 0.512032235 | 0.433760739 | 0.344742057 | -0.167290178 | 2.88E-10    | 5.24E-09    |
| GENEBODY | C11orf36 | 11 | 3240365/3241424/3240201/3239953/3243069/3243891/3243281/3240399/3240068/3240122                               | 10 | cg01738984/cg02082210/cg02681040/cg04656692/cg08093323/cg17957235/cg18169940/cg24038255/cg24702253/cg26462595            | 0.578796143 | 0.50031766  | 0.416960611 | -0.161835532 | 2.94E-12    | 2.73E-10    |
| GENEBODY | C11orf52 | 11 | 111796862/111794346                                                                                           | 2  | cg12247500/cg15318568                                                                                                    | 0.579033225 | 0.484909567 | 0.405061727 | -0.173971498 | 1.86E-08    | 1.50E-07    |
| GENEBODY | C11orf53 | 11 | 111154742/111155021/111155888/111155014/111154375/111154934/111154826/111154754                               | 8  | cg03078767/cg03554573/cg06246444/cg06978117/cg14675241/cg18246298/cg21127079/cg23091777                                  | 0.557567098 | 0.472839572 | 0.390458011 | -0.167109087 | 2.37E-10    | 4.59E-09    |
| GENEBODY | C12orf39 | 12 | 21680848/21679634/21680409/21680669/21680426/21681006/21680508/21680981/21680220                              | 9  | cg02125614/cg02393721/cg05161082/cg06241792/cg08347047/cg08828403/cg10437806/cg15308062/cg19499361                       | 0.084036882 | 0.137582897 | 0.260407689 | 0.176370807  | 0.000148248 | 0.000417128 |
| GENEBODY | C12orf53 | 12 | 6807082                                                                                                       | 1  | cg12051956                                                                                                               | 0.476141025 | 0.337174722 | 0.252782268 | -0.223358757 | 5.72E-12    | 3.96E-10    |
| GENEBODY | C13orf29 | 13 | 111521981/111522314/111522651/111522222                                                                       | 4  | cg03757805/cg04513422/cg13698168/cg16032841                                                                              | 0.564229618 | 0.5081458   | 0.358088846 | -0.206140771 | 1.23E-09    | 1.60E-08    |

|          |           |    |                                                                                                                                                                                                                                                             |    |                                                                                                                                                                                                                                                                                                                     |             |             |             |              |             |             |          |
|----------|-----------|----|-------------------------------------------------------------------------------------------------------------------------------------------------------------------------------------------------------------------------------------------------------------|----|---------------------------------------------------------------------------------------------------------------------------------------------------------------------------------------------------------------------------------------------------------------------------------------------------------------------|-------------|-------------|-------------|--------------|-------------|-------------|----------|
| GENEBODY | C13orf39  | 13 | 103345722/103340215                                                                                                                                                                                                                                         | 2  | cg03972040/cg07951201                                                                                                                                                                                                                                                                                               | 0.674567425 | 0.59340735  | 0.480139823 | -0.194427602 | 2.27E-10    | 4.46E-09    |          |
| GENEBODY | C14orf105 | 14 | 57952160                                                                                                                                                                                                                                                    | 1  | cg20469764                                                                                                                                                                                                                                                                                                          | 0.74590461  | 0.661443183 | 0.580634459 | -0.165270151 | 5.24E-05    | 0.000162929 |          |
| GENEBODY | C14orf139 | 14 | 95875792                                                                                                                                                                                                                                                    | 1  | cg10145926                                                                                                                                                                                                                                                                                                          | 0.512898735 | 0.398599789 | 0.321036291 | -0.191862444 | 1.57E-10    | 3.39E-09    |          |
| GENEBODY | C14orf23  | 14 | 29254853/29247148/29242823/29244153/29247336/29243234/29243762/29255119/29250912/29243173/29254530/29254961/29247605/29254680/29254942/29247396/29258014/29256427/29243504/29244185/29247458/29244278/29243622/29243404/29242040/29253725/29243690/29247705 | 28 | cg01302656/cg02008651/cg02273846/cg03505995/cg03796729/cg04184232/cg04991036/cg05119057/cg05374809/cg06779110/cg09241022/cg11226913/cg12967137/cg13046832/cg14006181/cg15482122/cg15506863/cg16733558/cg17007640/cg18875371/cg20043105/cg21195256/cg21542248/cg22337128/cg22400166/cg23059304/cg23302649/cg24154325 |             | 0.339200707 | 0.419109893 | 0.541993803  | 0.202793095 | 3.11E-09    | 3.43E-08 |
| GENEBODY | C14orf37  | 14 | 58567637/58528263/58543900/58599910/58599692/58499562                                                                                                                                                                                                       | 6  | cg01533082/cg02128489/cg05939089/cg15817440/cg16499677/cg23642334                                                                                                                                                                                                                                                   | 0.715069617 | 0.610660754 | 0.552156811 | -0.162912806 | 1.05E-12    | 1.51E-10    |          |
| GENEBODY | C14orf38  | 14 | 60001474/60043289/60040732/60032921/60032188/60032511                                                                                                                                                                                                       | 6  | cg13059113/cg14428252/cg21074911/cg23984976/cg25066134/cg27143664                                                                                                                                                                                                                                                   | 0.506751613 | 0.419323883 | 0.34797005  | -0.158781563 | 6.59E-12    | 4.32E-10    |          |
| GENEBODY | C15orf48  | 15 | 45724277/45724580                                                                                                                                                                                                                                           | 2  | cg20636382/cg23505252                                                                                                                                                                                                                                                                                               | 0.621534738 | 0.484264992 | 0.39664795  | -0.224886788 | 1.06E-11    | 5.65E-10    |          |
| GENEBODY | C15orf59  | 15 | 74037743/74040580/74033803                                                                                                                                                                                                                                  | 3  | cg16900255/cg17284334/cg22843146                                                                                                                                                                                                                                                                                    | 0.477220277 | 0.40070898  | 0.318695352 | -0.158524925 | 3.48E-09    | 3.74E-08    |          |
| GENEBODY | C16orf11  | 16 | 615073/613632/614986/614645/613343/613526/614852                                                                                                                                                                                                            | 7  | cg00131705/cg01435178/cg05389958/cg06951750/cg09476347/cg16452248/cg27409401                                                                                                                                                                                                                                        | 0.834766665 | 0.719300422 | 0.637916636 | -0.196850029 | 1.77E-11    | 7.93E-10    |          |
| GENEBODY | C16orf92  | 16 | 30034801                                                                                                                                                                                                                                                    | 1  | cg05034471                                                                                                                                                                                                                                                                                                          | 0.71218241  | 0.639790444 | 0.519420723 | -0.192761687 | 2.09E-07    | 1.20E-06    |          |

|          |           |    |                                                                                                 |    |                                                                                                                                       |             |             |             |              |             |             |
|----------|-----------|----|-------------------------------------------------------------------------------------------------|----|---------------------------------------------------------------------------------------------------------------------------------------|-------------|-------------|-------------|--------------|-------------|-------------|
| GENEBODY | C17orf106 | 17 | 73996245/7399384<br>3/73996331                                                                  | 3  | cg07471052/cg11061<br>343/cg14040633                                                                                                  | 0.576958515 | 0.441725786 | 0.371846536 | -0.205111979 | 5.75E-11    | 1.65E-09    |
| GENEBODY | C17orf46  | 17 | 43339328/4333563<br>2/43339358/433390<br>40/43339223                                            | 5  | cg04992638/cg05892<br>673/cg08247376/cg1<br>1933779/cg13001868                                                                        | 0.342498056 | 0.440215596 | 0.53911391  | 0.196615854  | 1.12E-05    | 4.03E-05    |
| GENEBODY | C17orf73  | 17 | 48844124/4884156<br>6                                                                           | 2  | cg03016571/cg12881<br>765                                                                                                             | 0.589294773 | 0.468265725 | 0.3843354   | -0.204959373 | 1.40E-11    | 6.85E-10    |
| GENEBODY | C18orf20  | 18 | 61751615                                                                                        | 1  | cg06069685                                                                                                                            | 0.601641725 | 0.505239633 | 0.424268005 | -0.17737372  | 3.47E-10    | 6.04E-09    |
| GENEBODY | C18orf26  | 18 | 52262555                                                                                        | 1  | cg01174441                                                                                                                            | 0.704881995 | 0.533918367 | 0.387608936 | -0.317273059 | 1.88E-12    | 2.17E-10    |
| GENEBODY | C19orf26  | 19 | 1230988/1235093/1<br>231165/1231292/12<br>33232/1235003                                         | 6  | cg01297744/cg03284<br>113/cg12062088/cg1<br>9058262/cg23357435<br>/cg27594157                                                         | 0.664054918 | 0.560682328 | 0.506711187 | -0.157343731 | 1.64E-09    | 2.03E-08    |
| GENEBODY | C19orf35  | 19 | 2278451/2276371/2<br>278708/2278773/22<br>75741/2280748/227<br>8847/2276322/2276<br>471/2278618 | 10 | cg01985343/cg07352<br>691/cg07595134/cg0<br>8399733/cg10627703<br>/cg14744050/cg1743<br>7218/cg21449569/cg<br>26472036/cg2734186<br>6 | 0.600029579 | 0.507751294 | 0.437974555 | -0.162055024 | 1.35E-10    | 3.05E-09    |
| GENEBODY | C19orf38  | 19 | 10978833/1098000<br>0                                                                           | 2  | cg11354682/cg27589<br>572                                                                                                             | 0.81887869  | 0.745483894 | 0.657669527 | -0.161209163 | 8.53E-06    | 3.18E-05    |
| GENEBODY | C1orf129  | 1  | 170964477                                                                                       | 1  | cg03458344                                                                                                                            | 0.441931635 | 0.347910817 | 0.225445495 | -0.21648614  | 2.13E-10    | 4.25E-09    |
| GENEBODY | C1orf158  | 1  | 12806667                                                                                        | 1  | cg24338843                                                                                                                            | 0.782470565 | 0.695402917 | 0.498194609 | -0.284275956 | 8.21E-08    | 5.29E-07    |
| GENEBODY | C1orf168  | 1  | 57263497/5726544<br>9                                                                           | 2  | cg09684245/cg20704<br>530                                                                                                             | 0.53133186  | 0.450454467 | 0.340683705 | -0.190648155 | 1.29E-10    | 2.93E-09    |
| GENEBODY | C1orf180  | 1  | 85100313/8509859<br>8                                                                           | 2  | cg11387751/cg25388<br>882                                                                                                             | 0.62865284  | 0.476172272 | 0.39536335  | -0.23328949  | 1.47E-09    | 1.84E-08    |
| GENEBODY | C1orf186  | 1  | 206240661                                                                                       | 1  | cg23738708                                                                                                                            | 0.74506173  | 0.682724617 | 0.57851695  | -0.16654478  | 4.93E-05    | 0.000154212 |
| GENEBODY | C1orf226  | 1  | 162352023/162351<br>057/162351367/162<br>351976/162351664                                       | 5  | cg11342789/cg15492<br>834/cg19678111/cg2<br>1547763/cg25212701                                                                        | 0.49387937  | 0.378519667 | 0.298744819 | -0.195134551 | 4.87E-12    | 3.69E-10    |
| GENEBODY | C1orf49   | 1  | 178488431                                                                                       | 1  | cg07961456                                                                                                                            | 0.557506865 | 0.463849467 | 0.392401091 | -0.165105774 | 5.05E-11    | 1.54E-09    |
| GENEBODY | C1QL2     | 2  | 119914744/119914<br>553/119915139                                                               | 3  | cg00820718/cg07090<br>701/cg11873147                                                                                                  | 0.277001978 | 0.364477144 | 0.50214335  | 0.225141373  | 6.54E-08    | 4.35E-07    |
| GENEBODY | C1QTNF4   | 11 | 47612070/4761178<br>0                                                                           | 2  | cg05537653/cg18356<br>785                                                                                                             | 0.258025811 | 0.411925617 | 0.491033436 | 0.233007626  | 2.43E-10    | 4.64E-09    |
| GENEBODY | C20orf123 | 20 | 45170254/4517446<br>5/45170494                                                                  | 3  | cg12288076/cg22094<br>045/cg24550212                                                                                                  | 0.70718541  | 0.572817228 | 0.535750782 | -0.171434628 | 0.000123932 | 0.000354308 |
| GENEBODY | C20orf196 | 20 | 5829461                                                                                         | 1  | cg10547761                                                                                                                            | 0.530999825 | 0.393510911 | 0.294486191 | -0.236513634 | 8.06E-14    | 4.51E-11    |

|          |           |    |                                                                                                                                                             |    |                                                                                                                                                                                                                     |             |             |             |              |          |          |
|----------|-----------|----|-------------------------------------------------------------------------------------------------------------------------------------------------------------|----|---------------------------------------------------------------------------------------------------------------------------------------------------------------------------------------------------------------------|-------------|-------------|-------------|--------------|----------|----------|
| GENEBODY | C20orf197 | 20 | 58645949                                                                                                                                                    | 1  | cg06347896                                                                                                                                                                                                          | 0.63527504  | 0.528443756 | 0.434222573 | -0.201052467 | 1.67E-06 | 7.49E-06 |
| GENEBODY | C20orf94  | 20 | 10492319/1050866<br>8/10492394/105005<br>46                                                                                                                 | 4  | cg02861178/cg07941<br>953/cg23558337/ch.2<br>0.230983F                                                                                                                                                              | 0.243657374 | 0.127434121 | 0.091783265 | -0.151874109 | 1.59E-08 | 1.32E-07 |
| GENEBODY | C21orf131 | 21 | 22175001                                                                                                                                                    | 1  | cg09614626                                                                                                                                                                                                          | 0.750141095 | 0.645449372 | 0.468220914 | -0.281920181 | 2.19E-08 | 1.71E-07 |
| GENEBODY | C21orf84  | 21 | 44898090                                                                                                                                                    | 1  | cg23732182                                                                                                                                                                                                          | 0.49169906  | 0.4092034   | 0.3327424   | -0.15895666  | 5.44E-11 | 1.60E-09 |
| GENEBODY | C21orf90  | 21 | 45937406/4593720<br>1                                                                                                                                       | 2  | cg04289880/cg06399<br>419                                                                                                                                                                                           | 0.52138309  | 0.403219428 | 0.312947382 | -0.208435708 | 1.25E-09 | 1.62E-08 |
| GENEBODY | C22orf15  | 22 | 24105692                                                                                                                                                    | 1  | cg10756887                                                                                                                                                                                                          | 0.455853575 | 0.558876878 | 0.609118645 | 0.15326507   | 2.60E-09 | 2.97E-08 |
| GENEBODY | C22orf25  | 22 | 20050298/2004437<br>1                                                                                                                                       | 2  | cg03175417/cg04419<br>754                                                                                                                                                                                           | 0.852329493 | 0.756382203 | 0.7000014   | -0.152328093 | 1.60E-11 | 7.40E-10 |
| GENEBODY | C2CD4D    | 1  | 151810904/151810<br>893/151810899/151<br>811364/151810887/<br>151810586/151810<br>589/151810485                                                             | 8  | cg04296699/cg05021<br>743/cg10781408/cg1<br>2749132/cg15015892<br>/cg19255477/cg2260<br>4218/cg26426745                                                                                                             | 0.285316502 | 0.391937868 | 0.504602615 | 0.219286113  | 8.21E-10 | 1.16E-08 |
| GENEBODY | C4BPB     | 1  | 207271346                                                                                                                                                   | 1  | cg19707677                                                                                                                                                                                                          | 0.49020137  | 0.351117572 | 0.257840991 | -0.232360379 | 1.68E-13 | 6.13E-11 |
| GENEBODY | C4orf17   | 4  | 100434274                                                                                                                                                   | 1  | cg15411303                                                                                                                                                                                                          | 0.54089219  | 0.414874839 | 0.327330295 | -0.213561895 | 1.01E-08 | 8.97E-08 |
| GENEBODY | C4orf37   | 4  | 99064102/9869007<br>2/99061101/990085<br>95/99031533                                                                                                        | 5  | cg03676636/cg08746<br>785/cg09681278/cg1<br>1579222/cg11861579                                                                                                                                                      | 0.660260377 | 0.57946456  | 0.490608621 | -0.169651756 | 3.29E-10 | 5.82E-09 |
| GENEBODY | C4orf47   | 4  | 186356202                                                                                                                                                   | 1  | cg13054212                                                                                                                                                                                                          | 0.854377895 | 0.731720367 | 0.568434236 | -0.285943659 | 2.71E-11 | 1.06E-09 |
| GENEBODY | C4orf49   | 4  | 140200520/140201<br>100/140200723/140<br>201065/140200658                                                                                                   | 5  | cg00208504/cg01733<br>638/cg05924540/cg0<br>7776847/cg13272465                                                                                                                                                      | 0.150081319 | 0.244701395 | 0.399377023 | 0.249295704  | 1.60E-08 | 1.33E-07 |
| GENEBODY | C5orf38   | 5  | 2753746/2753375/2<br>754274/2754016/27<br>53928/2753876/275<br>2601/2753852/2754<br>074/2754148/27547<br>53/2755004/275489<br>4/2752882/2754240<br>/2754322 | 16 | cg02509058/cg03570<br>636/cg04509074/cg1<br>0958362/cg12824782<br>/cg12860686/cg1370<br>2053/cg13944468/cg<br>18652721/cg1869334<br>5/cg21629500/cg219<br>99939/cg23164183/c<br>g26504021/cg269324<br>41/cg27144115 | 0.243845646 | 0.330042624 | 0.442586406 | 0.19874076   | 2.41E-07 | 1.37E-06 |
| GENEBODY | C5orf4    | 5  | 154214618                                                                                                                                                   | 1  | cg02379533                                                                                                                                                                                                          | 0.42599846  | 0.343909439 | 0.275215377 | -0.150783083 | 9.22E-11 | 2.27E-09 |
| GENEBODY | C5orf58   | 5  | 169663955                                                                                                                                                   | 1  | cg17038633                                                                                                                                                                                                          | 0.812719335 | 0.70161615  | 0.531221877 | -0.281497458 | 3.90E-09 | 4.09E-08 |



|          |          |    |                                                                                                               |   |                                                                                                                        |             |             |             |              |          |             |
|----------|----------|----|---------------------------------------------------------------------------------------------------------------|---|------------------------------------------------------------------------------------------------------------------------|-------------|-------------|-------------|--------------|----------|-------------|
| GENEBODY | C6       | 5  | 41160373/4115276<br>7                                                                                         | 2 | cg02598319/cg16582<br>255                                                                                              | 0.664062255 | 0.508529911 | 0.424378073 | -0.239684182 | 1.43E-10 | 3.17E-09    |
| GENEBODY | C6orf138 | 6  | 48030011/4789053<br>7/48033856                                                                                | 3 | cg04421392/cg09219<br>575/cg16000300                                                                                   | 0.62871339  | 0.547888969 | 0.471015939 | -0.157697451 | 1.68E-05 | 5.82E-05    |
| GENEBODY | C6orf58  | 6  | 127911362                                                                                                     | 1 | cg03346692                                                                                                             | 0.328331685 | 0.231389494 | 0.173702295 | -0.15462939  | 1.81E-08 | 1.46E-07    |
| GENEBODY | C7orf16  | 7  | 31745454                                                                                                      | 1 | cg23110407                                                                                                             | 0.7770301   | 0.720457139 | 0.58055675  | -0.19647335  | 1.98E-05 | 6.77E-05    |
| GENEBODY | C7orf33  | 7  | 148303238/148297<br>082                                                                                       | 2 | cg04464504/cg09843<br>869                                                                                              | 0.754527008 | 0.640737833 | 0.53003033  | -0.224496678 | 2.22E-08 | 1.73E-07    |
| GENEBODY | C7orf42  | 7  | 66417818                                                                                                      | 1 | cg18921475                                                                                                             | 0.509465275 | 0.397975594 | 0.294769914 | -0.214695361 | 8.09E-12 | 4.83E-10    |
| GENEBODY | C7orf44  | 7  | 43686889                                                                                                      | 1 | cg20741105                                                                                                             | 0.566863025 | 0.682208033 | 0.753825405 | 0.18696238   | 7.74E-12 | 4.73E-10    |
| GENEBODY | C7orf45  | 7  | 129850238/129849<br>144                                                                                       | 2 | cg05423713/cg23739<br>525                                                                                              | 0.613656165 | 0.527664822 | 0.422489877 | -0.191166288 | 4.41E-11 | 1.40E-09    |
| GENEBODY | C7orf53  | 7  | 112124979                                                                                                     | 1 | cg19543867                                                                                                             | 0.616641305 | 0.495213811 | 0.351521768 | -0.265119537 | 3.48E-10 | 6.05E-09    |
| GENEBODY | C7orf66  | 7  | 108524200                                                                                                     | 1 | cg21462681                                                                                                             | 0.755043265 | 0.636153822 | 0.435511264 | -0.319532001 | 3.11E-09 | 3.43E-08    |
| GENEBODY | C8A      | 1  | 57320685/5736808<br>4/57376284                                                                                | 3 | cg16648841/cg19926<br>245/cg22877129                                                                                   | 0.650853318 | 0.606787242 | 0.490298814 | -0.160554504 | 2.22E-07 | 1.27E-06    |
| GENEBODY | C8B      | 1  | 57420485                                                                                                      | 1 | cg13047196                                                                                                             | 0.58937025  | 0.4685176   | 0.36754115  | -0.2218291   | 3.23E-09 | 3.52E-08    |
| GENEBODY | C8orf45  | 8  | 67813257/6780611<br>2                                                                                         | 2 | cg15903955/cg19407<br>435                                                                                              | 0.522605355 | 0.4381076   | 0.319413614 | -0.203191741 | 4.06E-09 | 4.24E-08    |
| GENEBODY | C8orf56  | 8  | 104152279/104153<br>148/104145585/104<br>152750/104153173/<br>104152588/104152<br>754/104152244/104<br>149619 | 9 | cg02389252/cg06399<br>148/cg06450952/cg1<br>0163483/cg10918202<br>/cg11318251/cg1428<br>4952/cg14884291/cg<br>24633771 | 0.187019399 | 0.260934758 | 0.407430775 | 0.220411376  | 7.62E-06 | 2.88E-05    |
| GENEBODY | C9orf153 | 9  | 88844429                                                                                                      | 1 | cg14325674                                                                                                             | 0.61069315  | 0.509280833 | 0.412591941 | -0.198101209 | 3.71E-09 | 3.93E-08    |
| GENEBODY | C9orf173 | 9  | 140147188                                                                                                     | 1 | cg21174903                                                                                                             | 0.51807392  | 0.402703261 | 0.339554973 | -0.178518947 | 9.95E-09 | 8.86E-08    |
| GENEBODY | C9orf70  | 9  | 3899055                                                                                                       | 1 | cg14269813                                                                                                             | 0.515813755 | 0.299383833 | 0.253730073 | -0.262083682 | 6.28E-11 | 1.76E-09    |
| GENEBODY | C9orf75  | 9  | 140092222                                                                                                     | 1 | cg13851744                                                                                                             | 0.56522085  | 0.458802578 | 0.364773245 | -0.200447605 | 1.50E-10 | 3.28E-09    |
| GENEBODY | C9orf79  | 9  | 90498981/9049822<br>3                                                                                         | 2 | cg14331104/cg27495<br>908                                                                                              | 0.703789208 | 0.652843361 | 0.546248795 | -0.157540412 | 2.82E-06 | 1.18E-05    |
| GENEBODY | CA11     | 19 | 49141420/4914340<br>4                                                                                         | 2 | cg15172844/cg15967<br>501                                                                                              | 0.71194344  | 0.631728272 | 0.538537041 | -0.173406399 | 6.64E-06 | 2.55E-05    |
| GENEBODY | CABYR    | 18 | 21737584/2172573<br>1                                                                                         | 2 | cg05926667/cg19966<br>472                                                                                              | 0.75140954  | 0.683161289 | 0.584597436 | -0.166812104 | 3.98E-05 | 0.000126958 |

|          |          |    |                                                                                                                                                                                                                                                                                      |    |                                                                                                                                                                                                                                                                                                                                                |             |             |             |              |          |          |
|----------|----------|----|--------------------------------------------------------------------------------------------------------------------------------------------------------------------------------------------------------------------------------------------------------------------------------------|----|------------------------------------------------------------------------------------------------------------------------------------------------------------------------------------------------------------------------------------------------------------------------------------------------------------------------------------------------|-------------|-------------|-------------|--------------|----------|----------|
| GENEBODY | CACNA2D1 | 7  | 82019862/8199655<br>9/81809719/820041<br>87/81746161/81977<br>646/81638451/8175<br>2694/82072223/816<br>38368/81792131/82<br>071752/82072141/8<br>1637024/81666278/<br>81935073/8160117<br>3/81964885/820577<br>03/81949245/82072<br>332/81679070/8186<br>0423/81805241/820<br>66996 | 25 | cg00145985/cg00704<br>369/cg00712593/cg0<br>1454305/cg02857074<br>/cg03771436/cg0655<br>9389/cg07535316/cg<br>08992818/cg0927003<br>1/cg10030980/cg103<br>69665/cg11581706/c<br>g12536527/cg134202<br>07/cg13558509/cg14<br>363242/cg14607894/<br>cg16867817/cg17294<br>136/cg20288892/cg2<br>4426822/cg25585043<br>/cg26613778/cg2747<br>0827 | 0.561184771 | 0.472513066 | 0.381804078 | -0.179380693 | 3.54E-13 | 8.43E-11 |
| GENEBODY | CALCOCO2 | 17 | 46919180                                                                                                                                                                                                                                                                             | 1  | cg02753187                                                                                                                                                                                                                                                                                                                                     | 0.407011215 | 0.524217861 | 0.601138023 | 0.194126808  | 5.60E-09 | 5.52E-08 |
| GENEBODY | CAMK1G   | 1  | 209780966                                                                                                                                                                                                                                                                            | 1  | cg20994118                                                                                                                                                                                                                                                                                                                                     | 0.395489065 | 0.312407689 | 0.21479675  | -0.180692315 | 8.17E-13 | 1.29E-10 |
| GENEBODY | CANT1    | 17 | 76993394/7698983<br>2/76989680/769932<br>72/76991208/76993<br>506/76993374/7698<br>9965/76993698/769<br>91378/76991253/76<br>993618                                                                                                                                                  | 12 | cg00902147/cg10976<br>778/cg16337457/cg1<br>7129554/cg17838182<br>/cg18186771/cg2268<br>7077/cg23225637/cg<br>23507761/cg2391109<br>7/cg25052374/cg260<br>55488                                                                                                                                                                                | 0.782328371 | 0.690642685 | 0.600940522 | -0.181387849 | 5.39E-08 | 3.67E-07 |
| GENEBODY | CAP2     | 6  | 17492721/1747016<br>2/17472892/175193<br>87/17505703                                                                                                                                                                                                                                 | 5  | cg06573088/cg16709<br>403/cg22753611/cg2<br>3036213/cg25416270                                                                                                                                                                                                                                                                                 | 0.656450298 | 0.576869611 | 0.485568008 | -0.17088229  | 2.90E-08 | 2.17E-07 |
| GENEBODY | CAPN11   | 6  | 44134066/4414402<br>9                                                                                                                                                                                                                                                                | 2  | cg06432342/cg22798<br>503                                                                                                                                                                                                                                                                                                                      | 0.856237165 | 0.779400136 | 0.689293332 | -0.166943833 | 7.52E-08 | 4.92E-07 |
| GENEBODY | CARTPT   | 5  | 71016343/7101552<br>3/71015432                                                                                                                                                                                                                                                       | 3  | cg14999396/cg18250<br>028/cg23300372                                                                                                                                                                                                                                                                                                           | 0.590938803 | 0.671535867 | 0.742013114 | 0.151074311  | 8.91E-08 | 5.70E-07 |
| GENEBODY | CBLN2    | 18 | 70206471/7020692<br>5/70208357/702080<br>64                                                                                                                                                                                                                                          | 4  | cg03521982/cg19181<br>692/cg24956253/cg2<br>7373591                                                                                                                                                                                                                                                                                            | 0.60105974  | 0.530936726 | 0.413174638 | -0.187885102 | 2.61E-09 | 2.97E-08 |
| GENEBODY | CBWD6    | 9  | 69260795                                                                                                                                                                                                                                                                             | 1  | cg01119453                                                                                                                                                                                                                                                                                                                                     | 0.815019895 | 0.723716361 | 0.651987968 | -0.163031927 | 8.96E-06 | 3.32E-05 |
| GENEBODY | CCDC162  | 6  | 109615579                                                                                                                                                                                                                                                                            | 1  | cg00509249                                                                                                                                                                                                                                                                                                                                     | 0.789235055 | 0.642713406 | 0.527462918 | -0.261772137 | 1.98E-10 | 4.00E-09 |

|          |         |    |                                                                                                                                                                    |    |                                                                                                                                                                                                          |             |             |             |              |             |             |
|----------|---------|----|--------------------------------------------------------------------------------------------------------------------------------------------------------------------|----|----------------------------------------------------------------------------------------------------------------------------------------------------------------------------------------------------------|-------------|-------------|-------------|--------------|-------------|-------------|
| GENEBODY | CCDC28B | 1  | 32669150/3266929<br>3/32670695/326704<br>86                                                                                                                        | 4  | cg01235983/cg12462<br>377/cg19721787/cg2<br>3885562                                                                                                                                                      | 0.623867668 | 0.519440442 | 0.464291014 | -0.159576654 | 5.93E-10    | 9.10E-09    |
| GENEBODY | CCDC52  | 3  | 113213220/113217<br>290                                                                                                                                            | 2  | cg10572188/cg19892<br>944                                                                                                                                                                                | 0.609257035 | 0.495454989 | 0.442251141 | -0.167005894 | 1.06E-07    | 6.62E-07    |
| GENEBODY | CCDC67  | 11 | 93082066/9314381<br>0/93067324                                                                                                                                     | 3  | cg09919809/cg21115<br>391/cg21567022                                                                                                                                                                     | 0.619897248 | 0.538317674 | 0.451682661 | -0.168214588 | 2.08E-08    | 1.64E-07    |
| GENEBODY | CCDC79  | 16 | 66789395                                                                                                                                                           | 1  | cg07722333                                                                                                                                                                                               | 0.67643985  | 0.604216611 | 0.481075127 | -0.195364723 | 9.09E-10    | 1.25E-08    |
| GENEBODY | CCDC83  | 11 | 85601106/8559639<br>0                                                                                                                                              | 2  | cg07092880/cg24166<br>175                                                                                                                                                                                | 0.821923575 | 0.752734567 | 0.669314845 | -0.15260873  | 1.22E-06    | 5.72E-06    |
| GENEBODY | CCK     | 3  | 42304966/4230192<br>1/42304070/423050<br>63                                                                                                                        | 4  | cg06085877/cg13427<br>828/cg15778433/cg2<br>1327694                                                                                                                                                      | 0.186010025 | 0.240556373 | 0.392592868 | 0.206582843  | 0.000113774 | 0.000327454 |
| GENEBODY | CCRL2   | 3  | 46449636/4644931<br>3                                                                                                                                              | 2  | cg14749678/cg16021<br>018                                                                                                                                                                                | 0.437872943 | 0.360796239 | 0.284994182 | -0.152878761 | 4.62E-11    | 1.44E-09    |
| GENEBODY | CD1B    | 1  | 158301038/158300<br>733                                                                                                                                            | 2  | cg04574507/cg15952<br>487                                                                                                                                                                                | 0.51078378  | 0.358514756 | 0.2767323   | -0.23405148  | 2.06E-13    | 6.68E-11    |
| GENEBODY | CD1E    | 1  | 158325254/158324<br>331/158324471                                                                                                                                  | 3  | cg09664215/cg12200<br>412/cg26014409                                                                                                                                                                     | 0.614816155 | 0.483412517 | 0.376173212 | -0.238642943 | 3.32E-12    | 2.99E-10    |
| GENEBODY | CD200R1 | 3  | 112692897/112647<br>810                                                                                                                                            | 2  | cg10708271/cg17069<br>590                                                                                                                                                                                | 0.665344945 | 0.536198383 | 0.430932968 | -0.234411977 | 6.51E-10    | 9.74E-09    |
| GENEBODY | CD300E  | 17 | 72619556                                                                                                                                                           | 1  | cg04995095                                                                                                                                                                                               | 0.639208915 | 0.586559739 | 0.457235768 | -0.181973147 | 7.31E-05    | 0.000219864 |
| GENEBODY | CD34    | 1  | 208084255/208084<br>030/208083913/208<br>063733/208084071/<br>208081541/208084<br>099                                                                              | 7  | cg01566217/cg03990<br>033/cg04197452/cg0<br>9788693/cg16291276<br>/cg21697512/cg2756<br>6858                                                                                                             | 0.434061102 | 0.511811157 | 0.605030287 | 0.170969185  | 2.90E-08    | 2.17E-07    |
| GENEBODY | CD36    | 7  | 80291794/8029183<br>2                                                                                                                                              | 2  | cg02325411/cg05345<br>249                                                                                                                                                                                | 0.57524186  | 0.486998328 | 0.420398886 | -0.154842974 | 1.07E-09    | 1.42E-08    |
| GENEBODY | CD8A    | 2  | 87012810/8701741<br>9/87018382/870181<br>04/87016436/87017<br>591/87014979/8701<br>6720/87016129/870<br>17689/87017953/87<br>015813/87016259/8<br>7018054/87018585 | 15 | cg00219921/cg00916<br>536/cg02170525/cg0<br>5163496/cg07152196<br>/cg09046939/cg1142<br>3206/cg12653796/cg<br>13803976/cg1394652<br>0/cg17108819/cg243<br>45747/cg26057751/c<br>g27247697/cg275024<br>57 | 0.279459625 | 0.344021236 | 0.444266894 | 0.164807269  | 3.51E-06    | 1.44E-05    |

|          |          |    |                                                                                                                                                                                 |    |                                                                                                                                                                                                                     |             |             |             |              |             |             |
|----------|----------|----|---------------------------------------------------------------------------------------------------------------------------------------------------------------------------------|----|---------------------------------------------------------------------------------------------------------------------------------------------------------------------------------------------------------------------|-------------|-------------|-------------|--------------|-------------|-------------|
| GENEBODY | CDK14    | 7  | 90595609/9066481<br>6/90393740/903464<br>45/90454617/90355<br>905/90673305/9058<br>1938/90670577/906<br>82867/90406191/90<br>339132/90630110/9<br>0390136/90533507/<br>90562815 | 16 | cg05467568/cg06745<br>145/cg07521988/cg0<br>8583610/cg09314495<br>/cg09781028/cg1413<br>9051/cg19617217/cg<br>20411384/cg2049982<br>5/cg21700774/cg217<br>43182/cg21769057/c<br>g25150238/cg256194<br>59/cg27193735 | 0.706679665 | 0.62652391  | 0.534418827 | -0.172260838 | 1.79E-12    | 2.11E-10    |
| GENEBODY | CEACAM18 | 19 | 51984816                                                                                                                                                                        | 1  | cg03110722                                                                                                                                                                                                          | 0.537041    | 0.449763111 | 0.386227418 | -0.150813582 | 4.65E-08    | 3.23E-07    |
| GENEBODY | CEACAM21 | 19 | 42083748                                                                                                                                                                        | 1  | cg10389454                                                                                                                                                                                                          | 0.65132238  | 0.542951506 | 0.491541864 | -0.159780516 | 2.27E-05    | 7.66E-05    |
| GENEBODY | CEACAM3  | 19 | 42300812                                                                                                                                                                        | 1  | cg23181133                                                                                                                                                                                                          | 0.51520107  | 0.3874973   | 0.322241255 | -0.192959815 | 2.12E-11    | 8.96E-10    |
| GENEBODY | CEACAM5  | 19 | 42221239/4221376<br>3/42213020/422195<br>75/42221417/42219<br>138                                                                                                               | 6  | cg02768390/cg17794<br>784/cg21505334/cg2<br>2808163/cg23351290<br>/cg26257634                                                                                                                                       | 0.624930584 | 0.539440044 | 0.453361965 | -0.171568619 | 1.23E-09    | 1.59E-08    |
| GENEBODY | CEACAM6  | 19 | 42260485                                                                                                                                                                        | 1  | cg26813458                                                                                                                                                                                                          | 0.66001207  | 0.575946272 | 0.500648891 | -0.159363179 | 2.63E-07    | 1.47E-06    |
| GENEBODY | CEND1    | 11 | 788180/788406                                                                                                                                                                   | 2  | cg02554274/cg24193<br>659                                                                                                                                                                                           | 0.515985763 | 0.396734322 | 0.324084141 | -0.191901622 | 4.67E-14    | 3.73E-11    |
| GENEBODY | CES3     | 16 | 66995461                                                                                                                                                                        | 1  | cg09407859                                                                                                                                                                                                          | 0.644195175 | 0.501121989 | 0.384668623 | -0.259526552 | 5.16E-12    | 3.73E-10    |
| GENEBODY | CFH      | 1  | 196702931/196624<br>484                                                                                                                                                         | 2  | cg05922384/cg06377<br>993                                                                                                                                                                                           | 0.71928739  | 0.629771844 | 0.529944805 | -0.189342585 | 4.67E-05    | 0.000146997 |
| GENEBODY | CFHR1    | 1  | 196795943                                                                                                                                                                       | 1  | cg07209298                                                                                                                                                                                                          | 0.44851971  | 0.333937817 | 0.247106627 | -0.201413083 | 4.60E-11    | 1.44E-09    |
| GENEBODY | CFHR2    | 1  | 196923877                                                                                                                                                                       | 1  | cg09753006                                                                                                                                                                                                          | 0.48501923  | 0.369925206 | 0.264522118 | -0.220497112 | 1.39E-13    | 5.63E-11    |
| GENEBODY | CFHR5    | 1  | 196976319                                                                                                                                                                       | 1  | cg26049187                                                                                                                                                                                                          | 0.55615472  | 0.426080089 | 0.383495009 | -0.172659711 | 0.000192924 | 0.000529777 |
| GENEBODY | CHIT1    | 1  | 203186092/203192<br>720/203192517/203<br>192642                                                                                                                                 | 4  | cg15209419/cg17591<br>915/cg23683497/cg2<br>5732687                                                                                                                                                                 | 0.69525625  | 0.571828991 | 0.502249609 | -0.193006641 | 4.58E-09    | 4.66E-08    |
| GENEBODY | CHODL    | 21 | 19617873/1961808<br>8                                                                                                                                                           | 2  | cg11433319/cg17040<br>471                                                                                                                                                                                           | 0.40303238  | 0.512811294 | 0.693392332 | 0.290359952  | 3.63E-11    | 1.24E-09    |
| GENEBODY | CHRNA6   | 8  | 42611544/4261918<br>5/42608976                                                                                                                                                  | 3  | cg06292444/cg16417<br>043/cg19352832                                                                                                                                                                                | 0.708599585 | 0.655779078 | 0.556684536 | -0.151915049 | 0.000315481 | 0.000827191 |
| GENEBODY | CHST10   | 2  | 101015494/101014<br>098/101009789/101<br>010769/101009928/<br>101010037/101014<br>002                                                                                           | 7  | cg05141465/cg12002<br>119/cg12338127/cg1<br>8406852/cg18845236<br>/cg20147389/cg2133<br>6456                                                                                                                        | 0.842579298 | 0.731185044 | 0.618323625 | -0.224255673 | 5.48E-10    | 8.56E-09    |

|          |         |    |                                                             |   |                                                                   |             |             |             |              |             |             |
|----------|---------|----|-------------------------------------------------------------|---|-------------------------------------------------------------------|-------------|-------------|-------------|--------------|-------------|-------------|
| GENEBODY | CHST2   | 3  | 142840240/142839991/142839903/142840129/142839837/142840837 | 6 | cg14473344/cg17373442/cg18507129/cg22536150/cg23749856/cg26399662 | 0.347364705 | 0.438624984 | 0.604279828 | 0.256915123  | 4.10E-11    | 1.33E-09    |
| GENEBODY | CIB3    | 19 | 16272369                                                    | 1 | cg02870741                                                        | 0.66539429  | 0.5682174   | 0.468801568 | -0.196592722 | 5.97E-09    | 5.77E-08    |
| GENEBODY | CISD3   | 17 | 36889069/36888147                                           | 2 | cg07095330/cg24534731                                             | 0.57280588  | 0.459706594 | 0.379211368 | -0.193594512 | 2.32E-10    | 4.53E-09    |
| GENEBODY | CKM     | 19 | 45822962                                                    | 1 | cg00878747                                                        | 0.680393845 | 0.544300933 | 0.447835418 | -0.232558427 | 5.98E-10    | 9.14E-09    |
| GENEBODY | CLC     | 19 | 40227949                                                    | 1 | cg18254848                                                        | 0.77530625  | 0.701204794 | 0.573958777 | -0.201347473 | 6.17E-07    | 3.13E-06    |
| GENEBODY | CLDN1   | 3  | 190038679/190037695/190039141/190030195/190030381           | 5 | cg00804587/cg03601836/cg25330387/cg27177296/cg27326372            | 0.712564182 | 0.628719213 | 0.557685008 | -0.154879174 | 7.01E-10    | 1.03E-08    |
| GENEBODY | CLDN12  | 7  | 90042240                                                    | 1 | cg25244356                                                        | 0.788119685 | 0.567068389 | 0.470522159 | -0.317597526 | 1.93E-11    | 8.46E-10    |
| GENEBODY | CLDN5   | 22 | 19511707/19511987/19511967                                  | 3 | cg00811132/cg09092054/cg17577122                                  | 0.170191199 | 0.277565413 | 0.4992414   | 0.329050201  | 8.48E-09    | 7.70E-08    |
| GENEBODY | CLEC10A | 17 | 6979505                                                     | 1 | cg13516928                                                        | 0.739062255 | 0.667320994 | 0.584381095 | -0.15468116  | 2.54E-06    | 1.08E-05    |
| GENEBODY | CLEC1B  | 12 | 10150905                                                    | 1 | cg23325997                                                        | 0.84795976  | 0.82003375  | 0.697038123 | -0.150921637 | 0.000330497 | 0.000860194 |
| GENEBODY | CLEC2B  | 12 | 10007156                                                    | 1 | cg08753403                                                        | 0.87810528  | 0.81864865  | 0.677912227 | -0.200193053 | 2.51E-05    | 8.37E-05    |
| GENEBODY | CLEC3A  | 16 | 78056736                                                    | 1 | cg04365980                                                        | 0.50303315  | 0.402729922 | 0.311195664 | -0.191837486 | 1.18E-09    | 1.54E-08    |
| GENEBODY | CLEC4G  | 19 | 7796382/7795192/7794952/7795428/7795619/7795988             | 6 | cg04816348/cg05842480/cg09772661/cg12768640/cg13950603/cg23853484 | 0.383921066 | 0.436241719 | 0.545577043 | 0.161655977  | 7.74E-08    | 5.03E-07    |
| GENEBODY | CLEC4M  | 19 | 7834128/7831896/7828144                                     | 3 | cg11615959/cg18515510/cg21372914                                  | 0.658196345 | 0.597386833 | 0.487052403 | -0.171143942 | 4.76E-09    | 4.81E-08    |
| GENEBODY | CLEC7A  | 12 | 10280440                                                    | 1 | cg11650987                                                        | 0.571332045 | 0.501499889 | 0.417748127 | -0.153583918 | 3.29E-07    | 1.79E-06    |
| GENEBODY | CLPS    | 6  | 35764958                                                    | 1 | cg25107791                                                        | 0.55239714  | 0.443891833 | 0.359574932 | -0.192822208 | 1.61E-10    | 3.47E-09    |
| GENEBODY | CLRN1   | 3  | 150663357/150690183/150662697/150661892                     | 4 | cg10625737/cg21847114/cg24721964/cg26062204                       | 0.594813654 | 0.487601472 | 0.40037854  | -0.194435114 | 1.09E-12    | 1.52E-10    |
| GENEBODY | CLUL1   | 18 | 635375                                                      | 1 | cg25420230                                                        | 0.68358776  | 0.58515865  | 0.481325577 | -0.202262183 | 3.34E-11    | 1.19E-09    |
| GENEBODY | CMKLR1  | 12 | 108686134                                                   | 1 | cg08337166                                                        | 0.47663929  | 0.38012545  | 0.3071157   | -0.16952359  | 1.73E-13    | 6.13E-11    |
| GENEBODY | CNDP2   | 18 | 72168601/72167213                                           | 2 | cg15896356/cg25817165                                             | 0.483174658 | 0.383792042 | 0.317607791 | -0.165566867 | 6.70E-09    | 6.32E-08    |
| GENEBODY | CNFN    | 19 | 42891379/42893103/42891428/42891346                         | 4 | cg00912049/cg05206832/cg11673741/cg11692371                       | 0.727915265 | 0.631831661 | 0.565484364 | -0.162430901 | 3.68E-10    | 6.31E-09    |

|          |         |    |                                                                                                 |   |                                                                                                         |             |             |             |              |          |          |
|----------|---------|----|-------------------------------------------------------------------------------------------------|---|---------------------------------------------------------------------------------------------------------|-------------|-------------|-------------|--------------|----------|----------|
| GENEBODY | CNGB3   | 8  | 87632363/8768400<br>2/87721838/876841<br>32                                                     | 4 | cg06690689/cg09567<br>596/cg14224760/cg1<br>4283802                                                     | 0.712180115 | 0.625792988 | 0.531086606 | -0.181093509 | 3.35E-10 | 5.90E-09 |
| GENEBODY | CNNM1   | 10 | 101118946/101091<br>481/101118273/101<br>094135                                                 | 4 | cg10064248/cg12079<br>603/cg26459859/cg2<br>7604200                                                     | 0.800192034 | 0.720270192 | 0.642046109 | -0.158145925 | 1.28E-09 | 1.65E-08 |
| GENEBODY | CNOT8   | 5  | 154253549/154245<br>989                                                                         | 2 | cg12938814/cg27633<br>096                                                                               | 0.638388063 | 0.527326836 | 0.457329316 | -0.181058747 | 3.35E-11 | 1.19E-09 |
| GENEBODY | CNPY2   | 12 | 56708578                                                                                        | 1 | cg06617217                                                                                              | 0.636306345 | 0.5696452   | 0.430539232 | -0.205767113 | 3.71E-08 | 2.67E-07 |
| GENEBODY | CNTNAP4 | 16 | 76342377/7634909<br>7/76521159/763438<br>68/76342620/76342<br>678/76343663/7634<br>9255         | 8 | cg01151029/cg04556<br>349/cg05630943/cg0<br>6793062/cg09094037<br>/cg09966303/cg2538<br>3242/cg27420415 | 0.698162343 | 0.631361089 | 0.534820515 | -0.163341827 | 1.32E-09 | 1.69E-08 |
| GENEBODY | COL3A1  | 2  | 189859022/189839<br>474/189850571                                                               | 3 | cg12923449/cg20770<br>175/cg23235135                                                                    | 0.77037944  | 0.690482978 | 0.601203136 | -0.169176304 | 4.28E-06 | 1.72E-05 |
| GENEBODY | COL5A2  | 2  | 190028935/190019<br>594/190037419/189<br>957139/189986317/<br>189981405/189914<br>501/190035925 | 8 | cg01247454/cg07466<br>651/cg08247938/cg0<br>8466256/cg12329318<br>/cg18445715/cg2316<br>5166/cg26137350 | 0.730615638 | 0.663417743 | 0.579299399 | -0.151316239 | 1.26E-10 | 2.89E-09 |
| GENEBODY | COX6A2  | 16 | 31439106/3143939<br>3/31439191                                                                  | 3 | cg06507634/cg09117<br>448/cg19927508                                                                    | 0.539587792 | 0.556801622 | 0.704187644 | 0.164599852  | 1.67E-07 | 9.83E-07 |
| GENEBODY | CPA4    | 7  | 129945684/129933<br>646/129945688                                                               | 3 | cg16535352/cg19690<br>404/cg20845858                                                                    | 0.571739215 | 0.465804122 | 0.372698977 | -0.199040238 | 1.82E-06 | 8.06E-06 |
| GENEBODY | CPO     | 2  | 207814687                                                                                       | 1 | cg06539006                                                                                              | 0.35561406  | 0.268571372 | 0.190536509 | -0.165077551 | 1.82E-09 | 2.21E-08 |
| GENEBODY | CPT1C   | 19 | 50202524/5020486<br>2/50205634/502025<br>99/50196837/50204<br>707/50207768                      | 7 | cg14067541/cg14318<br>858/cg16206364/cg1<br>9325093/cg22793832<br>/cg24201033/cg2532<br>6729            | 0.729272    | 0.640909332 | 0.5729241   | -0.1563479   | 2.72E-10 | 5.04E-09 |
| GENEBODY | CRB3    | 19 | 6464885                                                                                         | 1 | cg24798010                                                                                              | 0.540825735 | 0.45650285  | 0.359844027 | -0.180981708 | 3.52E-08 | 2.56E-07 |
| GENEBODY | CRISP2  | 6  | 49670744                                                                                        | 1 | cg25734198                                                                                              | 0.63112058  | 0.498214589 | 0.444177677 | -0.186942903 | 7.24E-07 | 3.60E-06 |
| GENEBODY | CRNN    | 1  | 152383842                                                                                       | 1 | cg22164207                                                                                              | 0.56625306  | 0.470552183 | 0.340070045 | -0.226183015 | 1.90E-10 | 3.89E-09 |
| GENEBODY | CRYM    | 16 | 21272887/2128926<br>8/21287038                                                                  | 3 | cg00687714/cg01930<br>441/cg06816254                                                                    | 0.419521723 | 0.323017981 | 0.2499097   | -0.169612023 | 3.52E-12 | 3.02E-10 |
| GENEBODY | CSF2RB  | 22 | 37320126/3731904<br>2                                                                           | 2 | cg20017381/cg21209<br>356                                                                               | 0.50866471  | 0.399040333 | 0.320229382 | -0.188435328 | 3.06E-11 | 1.13E-09 |
| GENEBODY | CST1    | 20 | 23728814                                                                                        | 1 | cg26854096                                                                                              | 0.62301204  | 0.502245517 | 0.38728465  | -0.23572739  | 2.06E-11 | 8.77E-10 |

|          |         |    |                                                                                                                                     |    |                                                                                                                                                                 |             |             |             |              |          |          |
|----------|---------|----|-------------------------------------------------------------------------------------------------------------------------------------|----|-----------------------------------------------------------------------------------------------------------------------------------------------------------------|-------------|-------------|-------------|--------------|----------|----------|
| GENEBODY | CST5    | 20 | 23860078                                                                                                                            | 1  | cg02882813                                                                                                                                                      | 0.691158085 | 0.588927756 | 0.47503695  | -0.216121135 | 1.35E-07 | 8.15E-07 |
| GENEBODY | CSTA    | 3  | 122058117                                                                                                                           | 1  | cg16896618                                                                                                                                                      | 0.659543285 | 0.51898935  | 0.453166441 | -0.206376844 | 9.54E-08 | 6.05E-07 |
| GENEBODY | CTRB1   | 16 | 75255590/7525297<br>3                                                                                                               | 2  | cg09686298/cg21686<br>987                                                                                                                                       | 0.67584896  | 0.592074228 | 0.500159884 | -0.175689076 | 3.30E-09 | 3.58E-08 |
| GENEBODY | CTSB    | 8  | 11710911                                                                                                                            | 1  | cg03654169                                                                                                                                                      | 0.647987555 | 0.464031372 | 0.3500838   | -0.297903755 | 4.89E-14 | 3.73E-11 |
| GENEBODY | CTSS    | 1  | 150722805                                                                                                                           | 1  | cg10954654                                                                                                                                                      | 0.80894692  | 0.599731433 | 0.489601082 | -0.319345838 | 7.56E-14 | 4.38E-11 |
| GENEBODY | CXADRP2 | 15 | 22014725                                                                                                                            | 1  | cg08883696                                                                                                                                                      | 0.58764544  | 0.508337244 | 0.404744291 | -0.182901149 | 1.10E-08 | 9.57E-08 |
| GENEBODY | CYLC2   | 9  | 105764606                                                                                                                           | 1  | cg14150186                                                                                                                                                      | 0.56748472  | 0.431117722 | 0.313584627 | -0.253900093 | 7.10E-12 | 4.47E-10 |
| GENEBODY | CYP11B2 | 8  | 143995000                                                                                                                           | 1  | cg15847600                                                                                                                                                      | 0.535918465 | 0.456219994 | 0.354607359 | -0.181311106 | 3.63E-08 | 2.62E-07 |
| GENEBODY | CYP26A1 | 10 | 94834557/9483421<br>9/94834582/948352<br>55/94835624/94834<br>763/94834201                                                          | 7  | cg02325540/cg09192<br>377/cg10716835/cg1<br>2157438/cg16445268<br>/cg17538572/cg2253<br>6554                                                                    | 0.268875982 | 0.36807192  | 0.464625937 | 0.195749955  | 2.12E-06 | 9.21E-06 |
| GENEBODY | CYP27A1 | 2  | 219671206/219675<br>921/219649224/219<br>647360/219647167                                                                           | 5  | cg02930667/cg12806<br>497/cg21459645/cg2<br>6104932/cg26175971                                                                                                  | 0.500144093 | 0.416686251 | 0.348757854 | -0.151386239 | 1.48E-11 | 7.16E-10 |
| GENEBODY | CYP7A1  | 8  | 59405619                                                                                                                            | 1  | cg22550275                                                                                                                                                      | 0.693364355 | 0.577079222 | 0.46551185  | -0.227852505 | 5.71E-11 | 1.65E-09 |
| GENEBODY | DBX1    | 11 | 20178496/2017785<br>2/20178979/201814<br>56/20178138/20178<br>040/20180666/2017<br>8627/20180336/201<br>78677/20180700/20<br>180437 | 12 | cg00192136/cg04290<br>346/cg05469285/cg0<br>8525845/cg08835103<br>/cg09767822/cg1369<br>6942/cg14515571/cg<br>14777561/cg2114650<br>3/cg21678461/cg240<br>74033 | 0.264579145 | 0.280978452 | 0.417644494 | 0.15306535   | 3.24E-06 | 1.34E-05 |
| GENEBODY | DCD     | 12 | 55041948/5504137<br>9                                                                                                               | 2  | cg00868860/cg13396<br>068                                                                                                                                       | 0.579831453 | 0.417986736 | 0.28471787  | -0.295113582 | 4.54E-13 | 9.40E-11 |
| GENEBODY | DCT     | 13 | 95116571                                                                                                                            | 1  | cg24157814                                                                                                                                                      | 0.61398984  | 0.515280144 | 0.448377505 | -0.165612335 | 4.79E-09 | 4.83E-08 |
| GENEBODY | DDX4    | 5  | 55061610/5506193<br>6/55092708                                                                                                      | 3  | cg02269094/cg20414<br>753/cg24751730                                                                                                                            | 0.742627565 | 0.663423378 | 0.574653539 | -0.167974026 | 6.21E-10 | 9.37E-09 |
| GENEBODY | DEFA10P | 8  | 6826392                                                                                                                             | 1  | cg05787038                                                                                                                                                      | 0.44866998  | 0.35651815  | 0.267873955 | -0.180796025 | 6.11E-10 | 9.28E-09 |
| GENEBODY | DEFB110 | 6  | 49988602/4998664<br>3                                                                                                               | 2  | cg02585622/cg19765<br>351                                                                                                                                       | 0.64758293  | 0.523558475 | 0.419462702 | -0.228120228 | 1.01E-09 | 1.35E-08 |
| GENEBODY | DEFB118 | 20 | 29956585                                                                                                                            | 1  | cg20312687                                                                                                                                                      | 0.716861345 | 0.64576825  | 0.509959636 | -0.206901709 | 8.98E-06 | 3.33E-05 |
| GENEBODY | DEFB119 | 20 | 29978114/2996517<br>7/29978176                                                                                                      | 3  | cg03262887/cg07594<br>472/cg18462653                                                                                                                            | 0.658123905 | 0.560924528 | 0.454900241 | -0.203223664 | 1.47E-05 | 5.17E-05 |
| GENEBODY | DEFB122 | 20 | 30012193                                                                                                                            | 1  | cg01349088                                                                                                                                                      | 0.63772139  | 0.558780289 | 0.38016645  | -0.25755494  | 1.28E-08 | 1.09E-07 |
| GENEBODY | DEFB126 | 20 | 123613                                                                                                                              | 1  | cg20305726                                                                                                                                                      | 0.538635045 | 0.414299239 | 0.354083155 | -0.18455189  | 2.79E-09 | 3.12E-08 |

|          |               |    |                                                                                                                                                                                                                                                                                                                                                                                                                                                                                                                               |    |                                                        |                                                                                                                                                                                                                                                                                                                                                                                                                                                                                                                                                                                  |             |             |              |          |          |  |
|----------|---------------|----|-------------------------------------------------------------------------------------------------------------------------------------------------------------------------------------------------------------------------------------------------------------------------------------------------------------------------------------------------------------------------------------------------------------------------------------------------------------------------------------------------------------------------------|----|--------------------------------------------------------|----------------------------------------------------------------------------------------------------------------------------------------------------------------------------------------------------------------------------------------------------------------------------------------------------------------------------------------------------------------------------------------------------------------------------------------------------------------------------------------------------------------------------------------------------------------------------------|-------------|-------------|--------------|----------|----------|--|
| GENEBODY | DEFB133       | 6  | 49916931                                                                                                                                                                                                                                                                                                                                                                                                                                                                                                                      | 1  | cg00938547                                             | 0.768466425                                                                                                                                                                                                                                                                                                                                                                                                                                                                                                                                                                      | 0.662500878 | 0.572155855 | -0.19631057  | 1.50E-05 | 5.26E-05 |  |
| GENEBODY | DGCR10        | 22 | 19010419/19010468                                                                                                                                                                                                                                                                                                                                                                                                                                                                                                             | 2  | cg00458681/cg07167594                                  | 0.38674499                                                                                                                                                                                                                                                                                                                                                                                                                                                                                                                                                                       | 0.271615647 | 0.224242523 | -0.162502467 | 3.74E-12 | 3.16E-10 |  |
|          |               |    | 218251446/218466469/218619744/218299024/218612384/218277531/218151983/218375971/218558933/218182275/218154430/218332980/218418852/218465569/218464166/218438884/218169223/218520767/218487226/218301065/218231805/218550825/218578423/218258333/218465695/218621258/218597777/218531045/218269472/218196152/218295405/218340518/218268053/218481168/218247632/218285297/218149237/218179272/218620242/218493108/218618094/218231392/218416812/218316451/218577902/218354150/218343265/218219798/218515567/218466307/218157055 |    |                                                        | cg00085256/cg00792015/cg00829041/cg01396774/cg01603549/cg01821113/cg02916472/cg03013118/cg03512250/cg03991534/cg04942260/cg05502445/cg05511924/cg06504205/cg06523618/cg07152837/cg07502050/cg07934818/cg08401872/cg09151613/cg09386620/cg09519273/cg09684856/cg10763594/cg11770920/cg12309703/cg12596243/cg12820310/cg13502823/cg13765685/cg14506194/cg14538944/cg15335768/cg15353469/cg15912082/cg16003672/cg17316747/cg18309255/cg20103054/cg20270231/cg21776524/cg21898226/cg22039960/cg22245446/cg22675745/cg23340935/cg24079981/cg24980995/cg25928629/cg26501046/cg26830902 |             |             |              |          |          |  |
| GENEBODY | DIRC3         | 2  | 218621258/218597777/218531045/218269472/218196152/218295405/218340518/218268053/218481168/218247632/218285297/218149237/218179272/218620242/218493108/218618094/218231392/218416812/218316451/218577902/218354150/218343265/218219798/218515567/218466307/218157055                                                                                                                                                                                                                                                           | 51 |                                                        | 0.624894609                                                                                                                                                                                                                                                                                                                                                                                                                                                                                                                                                                      | 0.548450348 | 0.469901852 | -0.154992757 | 1.70E-11 | 7.74E-10 |  |
| GENEBODY | DKFZP434H168  | 16 | 56228114/56228385/56228188/56227065/56227690                                                                                                                                                                                                                                                                                                                                                                                                                                                                                  | 5  | cg00348762/cg03399271/cg07636145/cg09659734/cg27271486 | 0.308138805                                                                                                                                                                                                                                                                                                                                                                                                                                                                                                                                                                      | 0.371024859 | 0.498040949 | 0.189902144  | 6.30E-08 | 4.21E-07 |  |
| GENEBODY | DKFZp434J0226 | 19 | 46713976/46714834                                                                                                                                                                                                                                                                                                                                                                                                                                                                                                             | 2  | cg00145150/cg24473594                                  | 0.587093088                                                                                                                                                                                                                                                                                                                                                                                                                                                                                                                                                                      | 0.489403286 | 0.421254805 | -0.165838283 | 7.65E-10 | 1.11E-08 |  |
| GENEBODY | DKFZp434L192  | 7  | 56564743                                                                                                                                                                                                                                                                                                                                                                                                                                                                                                                      | 1  | cg03660331                                             | 0.448396405                                                                                                                                                                                                                                                                                                                                                                                                                                                                                                                                                                      | 0.328675994 | 0.290292227 | -0.158104178 | 9.82E-10 | 1.33E-08 |  |



|          |         |    |                                                                                                                                                                                                                                                                |    |                                                                                                                                                                                                                                                                                                                  |             |             |             |              |          |             |
|----------|---------|----|----------------------------------------------------------------------------------------------------------------------------------------------------------------------------------------------------------------------------------------------------------------|----|------------------------------------------------------------------------------------------------------------------------------------------------------------------------------------------------------------------------------------------------------------------------------------------------------------------|-------------|-------------|-------------|--------------|----------|-------------|
| GENEBODY | DKK2    | 4  | 107955266/107955<br>541/107952897/107<br>956287/107955762/<br>107956405                                                                                                                                                                                        | 6  | cg02034675/cg03903<br>991/cg04777988/cg1<br>7307558/cg17362052<br>/cg24874180                                                                                                                                                                                                                                    | 0.239676985 | 0.309899092 | 0.411615536 | 0.171938551  | 2.06E-05 | 7.00E-05    |
| GENEBODY | DKK4    | 8  | 42234243                                                                                                                                                                                                                                                       | 1  | cg09184899                                                                                                                                                                                                                                                                                                       | 0.77903867  | 0.742232667 | 0.5192362   | -0.25980247  | 1.23E-05 | 4.42E-05    |
| GENEBODY | DLX5    | 7  | 96650323/9665050<br>9/96652245/966531<br>83/96652894/96652<br>222/96652481/9665<br>0192/96652464/966<br>50096/96651983/96<br>652123/96652153/9<br>6650171/96651281/<br>96650407/9665153<br>7/96651915/966511<br>11/96650668/96652<br>375/96651586/9665<br>2115 | 23 | cg00400832/cg00503<br>840/cg02101486/cg0<br>6537230/cg06911084<br>/cg08101303/cg0883<br>2603/cg08835113/cg<br>08878323/cg0935911<br>4/cg11367354/cg115<br>00797/cg11891395/c<br>g12041387/cg134621<br>29/cg15339231/cg15<br>732768/cg18873386/<br>cg20080624/cg20377<br>305/cg24115040/cg2<br>7016494/cg27032146 | 0.312312286 | 0.381586771 | 0.522114544 | 0.209802258  | 2.81E-08 | 2.11E-07    |
| GENEBODY | DMRTA2  | 1  | 50886411/5088535<br>2/50886920/508851<br>32/50886393/50884<br>544/50884480/5088<br>6969/50886071/508<br>86782/50885369/50<br>886949                                                                                                                            | 12 | cg00945234/cg03989<br>480/cg04455430/cg0<br>4931216/cg07362328<br>/cg09792881/cg1051<br>2745/cg12756396/cg<br>13909582/cg1673261<br>6/cg16809460/cg251<br>91628                                                                                                                                                  | 0.242798509 | 0.261597178 | 0.40754812  | 0.164749611  | 1.08E-05 | 3.90E-05    |
| GENEBODY | DNAJB13 | 11 | 73668757/7366925<br>6/73669449/736686<br>26/73669290/73676<br>012                                                                                                                                                                                              | 6  | cg04044120/cg15670<br>924/cg15851278/cg2<br>0737388/cg23327896<br>/cg25592907                                                                                                                                                                                                                                    | 0.58036392  | 0.528503581 | 0.412315884 | -0.168048036 | 1.03E-08 | 9.11E-08    |
| GENEBODY | DSC1    | 18 | 28737288                                                                                                                                                                                                                                                       | 1  | cg27444744                                                                                                                                                                                                                                                                                                       | 0.685038485 | 0.640228611 | 0.523130864 | -0.161907621 | 3.96E-05 | 0.000126628 |
| GENEBODY | DSEL    | 18 | 65180255/6518175<br>5                                                                                                                                                                                                                                          | 2  | cg25533423/cg25677<br>027                                                                                                                                                                                                                                                                                        | 0.738221205 | 0.631348842 | 0.540128409 | -0.198092796 | 4.60E-11 | 1.44E-09    |
| GENEBODY | DSTN    | 20 | 17554599/1755288<br>1/17552529/175511<br>66/17582752                                                                                                                                                                                                           | 5  | cg00401234/cg02245<br>875/cg03340964/cg1<br>3462232/cg25694790                                                                                                                                                                                                                                                   | 0.453332995 | 0.342078361 | 0.270128798 | -0.183204197 | 1.01E-11 | 5.42E-10    |

|          |         |    |                                                                                                                                        |                                                                                                                                                                 |             |             |             |              |           |             |
|----------|---------|----|----------------------------------------------------------------------------------------------------------------------------------------|-----------------------------------------------------------------------------------------------------------------------------------------------------------------|-------------|-------------|-------------|--------------|-----------|-------------|
| GENEBODY | DUSP6   | 12 | 89744471/8974487<br>7/89744524/897447<br>01/89744488/89743<br>788/89744621/8974 12<br>3281/89744609/897<br>45192/89744662/89<br>744150 | cg00772407/cg01242<br>903/cg01814191/cg0<br>5769889/cg07239716<br>/cg10077746/cg1023<br>3654/cg13691961/cg<br>17740822/cg2052171<br>5/cg25124406/cg273<br>65701 | 0.41191367  | 0.301923749 | 0.234842943 | -0.177070727 | 4.12E-11  | 1.33E-09    |
| GENEBODY | DYDC1   | 10 | 82103151/8210305<br>2                                                                                                                  | cg01248810/cg24687<br>020                                                                                                                                       | 0.673570085 | 0.581009433 | 0.440630723 | -0.232939362 | 4.47E-08  | 3.12E-07    |
| GENEBODY | DYNC1I2 | 2  | 172581104/172546<br>870                                                                                                                | cg13460297/cg13504<br>410                                                                                                                                       | 0.71809179  | 0.637776056 | 0.560508684 | -0.157583106 | 2.76E-09  | 3.10E-08    |
| GENEBODY | DYTN    | 2  | 207537139/207516<br>641                                                                                                                | cg04589523/cg18921<br>607                                                                                                                                       | 0.42604688  | 0.338904667 | 0.249361591 | -0.176685289 | 3.35E-10  | 5.90E-09    |
| GENEBODY | DZIP1L  | 3  | 137787902/137816<br>617/137787060/137 4<br>808241                                                                                      | cg05265703/cg07665<br>466/cg17394126/cg2<br>4631735                                                                                                             | 0.67428192  | 0.587823339 | 0.518054452 | -0.156227468 | 5.94E-10  | 9.11E-09    |
| GENEBODY | ECM1    | 1  | 150484766/150480<br>856                                                                                                                | cg11404129/cg16386<br>293                                                                                                                                       | 0.67509026  | 0.616675828 | 0.522128741 | -0.152961519 | 9.90E-06  | 3.64E-05    |
| GENEBODY | EFCAB8  | 20 | 31482267                                                                                                                               | cg24384212                                                                                                                                                      | 0.75876768  | 0.701050311 | 0.602331964 | -0.156435716 | 0.0001542 | 0.000432402 |
| GENEBODY | EFCAB9  | 5  | 171621698                                                                                                                              | cg22203867                                                                                                                                                      | 0.526595235 | 0.422979683 | 0.31276675  | -0.213828485 | 4.71E-12  | 3.62E-10    |
| GENEBODY | EFNB3   | 17 | 7609416/7611315 2                                                                                                                      | cg22761431/cg27401<br>891                                                                                                                                       | 0.76269603  | 0.662044322 | 0.582484023 | -0.180212007 | 2.18E-07  | 1.25E-06    |
| GENEBODY | EFS     | 14 | 23830974                                                                                                                               | cg18289581                                                                                                                                                      | 0.498173575 | 0.391135828 | 0.284435145 | -0.21373843  | 2.94E-11  | 1.10E-09    |
| GENEBODY | EGR4    | 2  | 73519364/7352004<br>3/73519034/735187 5<br>02/73519343                                                                                 | cg06079106/cg13481<br>359/cg15769184/cg2<br>6049726/cg26647617                                                                                                  | 0.271071411 | 0.324044954 | 0.46778692  | 0.196715509  | 9.78E-07  | 4.71E-06    |
| GENEBODY | EIF3IP1 | 7  | 109599644                                                                                                                              | cg14146669                                                                                                                                                      | 0.715886195 | 0.555398583 | 0.426187    | -0.289699195 | 8.88E-08  | 5.68E-07    |
| GENEBODY | ELF5    | 11 | 34517751/3451754<br>1/34523679/345176 4<br>99                                                                                          | cg02882375/cg10631<br>356/cg21038795/cg2<br>4935217                                                                                                             | 0.59136958  | 0.482424185 | 0.405169194 | -0.186200386 | 5.12E-09  | 5.13E-08    |
| GENEBODY | ELTD1   | 1  | 79472282/7947198<br>4                                                                                                                  | cg14319235/cg17095<br>278                                                                                                                                       | 0.5566883   | 0.614574883 | 0.718865995 | 0.162177695  | 1.78E-10  | 3.72E-09    |
| GENEBODY | EME1    | 17 | 48454200                                                                                                                               | cg16622353                                                                                                                                                      | 0.60114464  | 0.469594944 | 0.366771655 | -0.234372985 | 6.30E-13  | 1.14E-10    |
| GENEBODY | EPHA5   | 4  | 66321852/6653347<br>2/66535203/665340<br>40/66535145/66534 8<br>326/66534218/6653<br>4538                                              | cg01694632/cg04322<br>202/cg10334354/cg1<br>4647451/cg18420965<br>/cg19410532/cg2319<br>3365/cg23842170                                                         | 0.421110616 | 0.491374165 | 0.580203542 | 0.159092927  | 4.05E-07  | 2.15E-06    |

|          |         |    |                                                             |   |                                                                   |             |             |             |              |          |          |
|----------|---------|----|-------------------------------------------------------------|---|-------------------------------------------------------------------|-------------|-------------|-------------|--------------|----------|----------|
| GENEBODY | EPHB6   | 7  | 142561918/142564916/142564463/142562041/142562153/142564897 | 6 | cg03217572/cg04990850/cg08415172/cg14349531/cg16914425/cg21577626 | 0.685865485 | 0.600568664 | 0.522832005 | -0.16303348  | 1.05E-11 | 5.65E-10 |
| GENEBODY | EPS8    | 12 | 15822734/15790461/15815827/15830414                         | 4 | cg03954343/cg05343665/cg10231182/cg23200995                       | 0.80322547  | 0.666487953 | 0.606446752 | -0.196778718 | 2.95E-13 | 7.92E-11 |
| GENEBODY | ERGIC2  | 12 | 29506350                                                    | 1 | cg07216656                                                        | 0.75708351  | 0.686323039 | 0.605618645 | -0.151464865 | 2.53E-07 | 1.42E-06 |
| GENEBODY | ESD     | 13 | 47352461                                                    | 1 | cg22733207                                                        | 0.63846893  | 0.489193439 | 0.432157541 | -0.206311389 | 1.27E-11 | 6.43E-10 |
| GENEBODY | ESM1    | 5  | 54275198                                                    | 1 | cg09452568                                                        | 0.848279415 | 0.742931278 | 0.652884932 | -0.195394483 | 3.24E-06 | 1.34E-05 |
| GENEBODY | F13B    | 1  | 197030122                                                   | 1 | cg03138560                                                        | 0.64337009  | 0.521757806 | 0.38473505  | -0.25863504  | 2.68E-12 | 2.64E-10 |
| GENEBODY | FAM12B  | 14 | 21238436                                                    | 1 | cg01724456                                                        | 0.64670852  | 0.53674455  | 0.445334055 | -0.201374465 | 2.60E-09 | 2.97E-08 |
| GENEBODY | FAM153A | 5  | 177165350                                                   | 1 | cg24668618                                                        | 0.816211845 | 0.743645428 | 0.598093455 | -0.21811839  | 7.99E-06 | 3.00E-05 |
| GENEBODY | FAM153B | 5  | 175526747/175531103/175526951                               | 3 | cg06853587/cg19956449/cg21983520                                  | 0.750455245 | 0.682799419 | 0.575548673 | -0.174906572 | 1.14E-06 | 5.37E-06 |
| GENEBODY | FAM166A | 9  | 140138821                                                   | 1 | cg14010394                                                        | 0.651466025 | 0.530640194 | 0.422880868 | -0.228585157 | 5.92E-11 | 1.69E-09 |
| GENEBODY | FAM180A | 7  | 135429446                                                   | 1 | cg09935440                                                        | 0.67682329  | 0.564978794 | 0.521712268 | -0.155111022 | 2.89E-08 | 2.17E-07 |
| GENEBODY | FAM26D  | 6  | 116879209                                                   | 1 | cg15314855                                                        | 0.533883    | 0.456439    | 0.349367114 | -0.184515886 | 8.40E-10 | 1.18E-08 |
| GENEBODY | FAM49A  | 2  | 16767476                                                    | 1 | cg10090418                                                        | 0.770699375 | 0.590443906 | 0.396925518 | -0.373773857 | 2.52E-11 | 1.01E-09 |
| GENEBODY | FAM71F1 | 7  | 128368940                                                   | 1 | cg13169491                                                        | 0.73040038  | 0.65350435  | 0.521702445 | -0.208697935 | 5.98E-09 | 5.77E-08 |
| GENEBODY | FAM71F2 | 7  | 128312789                                                   | 1 | cg05780294                                                        | 0.51044051  | 0.4027293   | 0.332807686 | -0.177632824 | 5.67E-11 | 1.65E-09 |
| GENEBODY | FAM72D  | 1  | 143907550                                                   | 1 | cg12386752                                                        | 0.54440671  | 0.438273639 | 0.3464906   | -0.19791611  | 2.82E-11 | 1.07E-09 |
| GENEBODY | FAM92A3 | 4  | 183960120                                                   | 1 | cg08090384                                                        | 0.535621085 | 0.410147389 | 0.285887109 | -0.249733976 | 4.12E-11 | 1.33E-09 |
| GENEBODY | FASTKD3 | 5  | 7866767/7866371                                             | 2 | cg05495391/cg24575485                                             | 0.574449305 | 0.459530172 | 0.376068436 | -0.198380869 | 1.53E-11 | 7.24E-10 |
| GENEBODY | FBXL21  | 5  | 135273913                                                   | 1 | cg17796593                                                        | 0.637710975 | 0.496861872 | 0.393550982 | -0.244159993 | 2.63E-10 | 4.93E-09 |
| GENEBODY | FBXO34  | 14 | 55818341                                                    | 1 | cg23234828                                                        | 0.682846015 | 0.563222067 | 0.491955659 | -0.190890356 | 7.52E-09 | 6.98E-08 |
| GENEBODY | FCGR1B  | 1  | 120929152                                                   | 1 | cg20821544                                                        | 0.611994795 | 0.501138567 | 0.391535082 | -0.220459713 | 1.32E-09 | 1.69E-08 |
| GENEBODY | FCGR3A  | 1  | 161519396/161516128                                         | 2 | cg04384208/cg07111566                                             | 0.718840693 | 0.615740392 | 0.49458947  | -0.224251222 | 2.94E-11 | 1.10E-09 |
| GENEBODY | FCGR3B  | 1  | 161600769                                                   | 1 | cg04567009                                                        | 0.673309755 | 0.510614594 | 0.379355841 | -0.293953914 | 2.17E-11 | 9.11E-10 |
| GENEBODY | FCN2    | 9  | 137772886/137775039                                         | 2 | cg11884243/cg14033273                                             | 0.652238323 | 0.556451617 | 0.491710084 | -0.160528238 | 4.54E-10 | 7.39E-09 |
| GENEBODY | FCN3    | 1  | 27701171                                                    | 1 | cg02365086                                                        | 0.640959805 | 0.507824483 | 0.390144855 | -0.25081495  | 1.85E-09 | 2.24E-08 |
| GENEBODY | FCRL1   | 1  | 157772525/157776690/157789662/157771971                     | 4 | cg00394221/cg08933467/cg09340639/cg11810135                       | 0.532901654 | 0.420874889 | 0.331312738 | -0.201588916 | 1.47E-13 | 5.80E-11 |

|          |          |    |                                                                                                                                                                    |    |                                                                                                                                                                                                          |             |             |             |              |          |          |
|----------|----------|----|--------------------------------------------------------------------------------------------------------------------------------------------------------------------|----|----------------------------------------------------------------------------------------------------------------------------------------------------------------------------------------------------------|-------------|-------------|-------------|--------------|----------|----------|
| GENEBODY | FCRL3    | 1  | 157668115/157669<br>111/157660319/157<br>670220                                                                                                                    | 4  | cg05956521/cg07184<br>316/cg11150520/cg2<br>5259754                                                                                                                                                      | 0.728045736 | 0.631628311 | 0.562651805 | -0.165393932 | 3.63E-08 | 2.62E-07 |
| GENEBODY | FEM1C    | 5  | 114878738/114867<br>569                                                                                                                                            | 2  | cg02364826/cg25619<br>717                                                                                                                                                                                | 0.42904047  | 0.351327544 | 0.274309552 | -0.154730918 | 2.31E-11 | 9.43E-10 |
| GENEBODY | FEZF2    | 3  | 62357769/6235604<br>2/62358234/623562<br>23/62355884/62356<br>774/62356323/6235<br>8241/62357176/623<br>56962/62358379                                             | 11 | cg02083234/cg03915<br>638/cg03986829/cg1<br>0542584/cg12988424<br>/cg15422685/cg1681<br>7826/cg18104012/cg<br>18525486/cg2007217<br>1/cg26136365                                                         | 0.310608993 | 0.383128865 | 0.529031671 | 0.218422678  | 6.79E-08 | 4.49E-07 |
| GENEBODY | FGF10    | 5  | 44316088/4433275<br>7/44333003                                                                                                                                     | 3  | cg04239786/cg16204<br>420/cg25021530                                                                                                                                                                     | 0.566717853 | 0.461156296 | 0.393539517 | -0.173178337 | 9.29E-14 | 4.89E-11 |
| GENEBODY | FGF3     | 11 | 69632655/6962528<br>4/69631981/696252<br>18/69626349/69625<br>409/69628171/6963<br>2455/69632335/696<br>33001/69632883/69<br>632220/69632117/6<br>9633070/69633313 | 15 | cg04602060/cg04691<br>634/cg06727490/cg0<br>6889951/cg10361167<br>/cg11410726/cg1214<br>1747/cg12319507/cg<br>13703576/cg1538065<br>7/cg17038667/cg175<br>40356/cg18222122/c<br>g21283867/cg247736<br>76 | 0.339347864 | 0.396072119 | 0.490115832 | 0.150767968  | 2.95E-05 | 9.69E-05 |
| GENEBODY | FGF5     | 4  | 81189927/8118840<br>5/81188471/811897<br>06/81189774                                                                                                               | 5  | cg04401986/cg11580<br>948/cg12341047/cg1<br>4349667/cg17080423                                                                                                                                           | 0.291678863 | 0.382729572 | 0.480519877 | 0.188841014  | 1.18E-07 | 7.23E-07 |
| GENEBODY | FGFBP1   | 4  | 15938093                                                                                                                                                           | 1  | cg21039166                                                                                                                                                                                               | 0.55243293  | 0.432582933 | 0.368246241 | -0.184186689 | 5.66E-11 | 1.65E-09 |
| GENEBODY | FHL5     | 6  | 97058943                                                                                                                                                           | 1  | cg22236418                                                                                                                                                                                               | 0.48467161  | 0.443163689 | 0.329316986 | -0.155354624 | 1.80E-05 | 6.21E-05 |
| GENEBODY | FLJ16779 | 20 | 61886082/6188585<br>0/61885448/618862<br>62/61886142/61886<br>079/61886587/6188<br>6313/61890060/618<br>85926                                                      | 10 | cg01911708/cg02165<br>799/cg05326358/cg0<br>7675169/cg07986239<br>/cg08111446/cg1365<br>7510/cg14877226/cg<br>18822613/cg2394289<br>7                                                                    | 0.329838654 | 0.441325765 | 0.566237688 | 0.236399034  | 2.09E-08 | 1.65E-07 |
| GENEBODY | FLJ20184 | 4  | 106477599/106515<br>450                                                                                                                                            | 2  | cg00796302/cg05626<br>226                                                                                                                                                                                | 0.440447705 | 0.349669383 | 0.274798314 | -0.165649391 | 4.85E-11 | 1.50E-09 |
| GENEBODY | FLJ40330 | 2  | 89065442/8906560<br>5/89065509                                                                                                                                     | 3  | cg01506298/cg09410<br>752/cg12294208                                                                                                                                                                     | 0.377687627 | 0.45508888  | 0.555499145 | 0.177811519  | 8.19E-07 | 4.02E-06 |

|          |          |    |                                                                                                                                                                 |    |                                                                                                                                                                                 |             |             |             |              |             |             |
|----------|----------|----|-----------------------------------------------------------------------------------------------------------------------------------------------------------------|----|---------------------------------------------------------------------------------------------------------------------------------------------------------------------------------|-------------|-------------|-------------|--------------|-------------|-------------|
| GENEBODY | FLJ41856 | 19 | 45059935                                                                                                                                                        | 1  | cg04588257                                                                                                                                                                      | 0.59610764  | 0.508134228 | 0.394901732 | -0.201205908 | 5.18E-08    | 3.56E-07    |
| GENEBODY | FMO6P    | 1  | 171111193/171116322                                                                                                                                             | 2  | cg05376227/cg07726215                                                                                                                                                           | 0.5562736   | 0.6588193   | 0.706812109 | 0.150538509  | 5.63E-08    | 3.81E-07    |
| GENEBODY | FOX11    | 5  | 169534834                                                                                                                                                       | 1  | cg01288375                                                                                                                                                                      | 0.63690301  | 0.552765289 | 0.435594777 | -0.201308233 | 9.95E-06    | 3.65E-05    |
| GENEBODY | FRMD6    | 14 | 52164293/52171626/52182702/52191937/52174876/52160138                                                                                                           | 6  | cg05858008/cg07507518/cg09987240/cg11777870/cg18899667/cg25584474                                                                                                               | 0.600488497 | 0.528044793 | 0.426526462 | -0.173962035 | 7.22E-10    | 1.06E-08    |
| GENEBODY | FUT7     | 9  | 139925395/139925856/139925750                                                                                                                                   | 3  | cg02971262/cg03630596/cg14205519                                                                                                                                                | 0.771536373 | 0.66372385  | 0.578319041 | -0.193217332 | 8.68E-11    | 2.19E-09    |
| GENEBODY | GALNTL5  | 7  | 151716974/151664041/151653523/151664190/151664071/151692197/151653890                                                                                           | 7  | cg01662876/cg01760103/cg11727304/cg13835670/cg21565299/cg25213550/cg25310567                                                                                                    | 0.629539729 | 0.518002206 | 0.404858738 | -0.224680991 | 8.28E-15    | 1.44E-11    |
| GENEBODY | GALR1    | 18 | 74963364/749640307/74963807                                                                                                                                     | 3  | cg00662556/cg05896682/cg26038190                                                                                                                                                | 0.36631598  | 0.452316078 | 0.616849118 | 0.250533138  | 1.26E-09    | 1.63E-08    |
| GENEBODY | GAMT     | 19 | 1401118/1399338/1400851/1399166                                                                                                                                 | 4  | cg00308133/cg09507386/cg23960750/cg24229707                                                                                                                                     | 0.522959114 | 0.411549359 | 0.335328745 | -0.187630368 | 2.14E-13    | 6.75E-11    |
| GENEBODY | GAPT     | 5  | 57790494                                                                                                                                                        | 1  | cg05904808                                                                                                                                                                      | 0.84336172  | 0.797591972 | 0.691763377 | -0.151598343 | 0.000120833 | 0.000346162 |
| GENEBODY | GATA2    | 3  | 128204813/128202493/128202731/128205496/128200769/128205143/128204927/128202797/128203414/128205274/128205418/128205200/128202176/128200723/128204047/128204413 | 16 | cg01102073/cg01518889/cg02815312/cg04347582/cg04535236/cg06115614/cg06796779/cg07132710/cg07195926/cg07263393/cg08755743/cg09852607/cg10935762/cg15038286/cg22915582/cg25229470 | 0.416216061 | 0.468868378 | 0.578658028 | 0.162441968  | 3.36E-09    | 3.63E-08    |
| GENEBODY | GDF1     | 19 | 18980443/18980744/18980103/18980110                                                                                                                             | 4  | cg01215442/cg19256094/cg19761304/cg21526172                                                                                                                                     | 0.47916622  | 0.560289072 | 0.643120468 | 0.163954248  | 2.32E-12    | 2.52E-10    |

|          |         |    |                                                                                                                                                                                                                                                                                                                                                                              |    |                                                                                                                                                                                                                                                                                                                                                                                                                                                            |             |             |             |              |          |          |
|----------|---------|----|------------------------------------------------------------------------------------------------------------------------------------------------------------------------------------------------------------------------------------------------------------------------------------------------------------------------------------------------------------------------------|----|------------------------------------------------------------------------------------------------------------------------------------------------------------------------------------------------------------------------------------------------------------------------------------------------------------------------------------------------------------------------------------------------------------------------------------------------------------|-------------|-------------|-------------|--------------|----------|----------|
| GENEBODY | GDF6    | 8  | 97167170/9715685<br>9/97166036/971624<br>31/97172012/97158<br>015/97166291/9717<br>1332/97171668/971<br>69621/97157878/97<br>170097/97166862/9<br>7169767/97171901/<br>97167470/9716250<br>6/97171827/971580<br>52/97170666/97170<br>364/97167768/9717<br>2219/97165770/971<br>57856/97169920/97<br>172480/97157453/9<br>7160999/97157756/<br>97169764/9717112<br>6/97167878 | 33 | cg00394180/cg00585<br>714/cg01673674/cg0<br>2246426/cg03224572<br>/cg05690644/cg0704<br>6818/cg07159961/cg<br>07589612/cg0838127<br>4/cg09164580/cg101<br>31194/cg10133465/c<br>g10689528/cg110735<br>58/cg11738701/cg12<br>156944/cg13211683/<br>cg15006881/cg15270<br>654/cg15277906/cg1<br>6290866/cg16530959<br>/cg16574871/cg1782<br>0365/cg17999376/cg<br>18214379/cg1853320<br>1/cg18902541/cg196<br>91778/cg20800022/c<br>g26035118/cg265507<br>10 | 0.328101586 | 0.389149618 | 0.512902275 | 0.184800689  | 9.12E-10 | 1.26E-08 |
| GENEBODY | GFI1B   | 9  | 135865263/135866<br>029/135863570/135<br>863521                                                                                                                                                                                                                                                                                                                              | 4  | cg12658925/cg14020<br>186/cg14475859/cg2<br>0143773                                                                                                                                                                                                                                                                                                                                                                                                        | 0.7395212   | 0.629373991 | 0.563725532 | -0.175795668 | 3.17E-11 | 1.16E-09 |
| GENEBODY | GJA1    | 6  | 121768597                                                                                                                                                                                                                                                                                                                                                                    | 1  | cg23176309                                                                                                                                                                                                                                                                                                                                                                                                                                                 | 0.75416899  | 0.695033606 | 0.581977623 | -0.172191367 | 7.24E-06 | 2.75E-05 |
| GENEBODY | GKN1    | 2  | 69206176                                                                                                                                                                                                                                                                                                                                                                     | 1  | cg20874031                                                                                                                                                                                                                                                                                                                                                                                                                                                 | 0.39956413  | 0.2527214   | 0.186330905 | -0.213233225 | 1.03E-14 | 1.49E-11 |
| GENEBODY | GNAT2   | 1  | 110153100                                                                                                                                                                                                                                                                                                                                                                    | 1  | cg23985820                                                                                                                                                                                                                                                                                                                                                                                                                                                 | 0.740908395 | 0.696802383 | 0.54897315  | -0.191935245 | 2.44E-07 | 1.38E-06 |
| GENEBODY | GNAT3   | 7  | 80096608                                                                                                                                                                                                                                                                                                                                                                     | 1  | cg05869611                                                                                                                                                                                                                                                                                                                                                                                                                                                 | 0.387229335 | 0.323123978 | 0.222492886 | -0.164736449 | 2.68E-08 | 2.03E-07 |
| GENEBODY | GNG13   | 16 | 848997                                                                                                                                                                                                                                                                                                                                                                       | 1  | cg08515427                                                                                                                                                                                                                                                                                                                                                                                                                                                 | 0.672862695 | 0.591957417 | 0.515389482 | -0.157473213 | 1.02E-07 | 6.39E-07 |
| GENEBODY | GOLGA6C | 15 | 75551123                                                                                                                                                                                                                                                                                                                                                                     | 1  | cg23516121                                                                                                                                                                                                                                                                                                                                                                                                                                                 | 0.78995868  | 0.690753089 | 0.57137425  | -0.21858443  | 1.26E-11 | 6.43E-10 |
| GENEBODY | GOT1L1  | 8  | 37793789                                                                                                                                                                                                                                                                                                                                                                     | 1  | cg20154938                                                                                                                                                                                                                                                                                                                                                                                                                                                 | 0.693218705 | 0.626493511 | 0.520363668 | -0.172855037 | 7.48E-07 | 3.71E-06 |
| GENEBODY | GPAM    | 10 | 113941466/113939<br>632                                                                                                                                                                                                                                                                                                                                                      | 2  | cg11888270/cg16794<br>749                                                                                                                                                                                                                                                                                                                                                                                                                                  | 0.767883593 | 0.691112603 | 0.614746482 | -0.153137111 | 1.98E-07 | 1.15E-06 |
| GENEBODY | GPHB5   | 14 | 63781994                                                                                                                                                                                                                                                                                                                                                                     | 1  | cg23301979                                                                                                                                                                                                                                                                                                                                                                                                                                                 | 0.81597335  | 0.734470383 | 0.630290332 | -0.185683018 | 6.97E-07 | 3.49E-06 |
| GENEBODY | GPR120  | 10 | 95327305/9532765<br>4/95327884/953272<br>92/95329303/95327<br>325/95327683/9532<br>7107                                                                                                                                                                                                                                                                                      | 8  | cg05613447/cg08961<br>547/cg09488203/cg1<br>0905401/cg13633964<br>/cg15133448/cg1987<br>0668/cg22749310                                                                                                                                                                                                                                                                                                                                                    | 0.329563668 | 0.227030612 | 0.166920966 | -0.162642702 | 9.23E-11 | 2.27E-09 |

|          |        |    |                                                                         |   |                                                                                         |             |             |             |              |             |             |
|----------|--------|----|-------------------------------------------------------------------------|---|-----------------------------------------------------------------------------------------|-------------|-------------|-------------|--------------|-------------|-------------|
| GENEBODY | GPR149 | 3  | 154146183/154146398/154145868/154145810                                 | 4 | cg00046499/cg04151278/cg16619395/cg20498859                                             | 0.291585609 | 0.374960358 | 0.539452854 | 0.247867246  | 4.15E-09    | 4.31E-08    |
| GENEBODY | GPR161 | 1  | 168058592/168060823                                                     | 2 | cg00699919/cg25097189                                                                   | 0.54511893  | 0.409240878 | 0.315100332 | -0.230018598 | 2.16E-11    | 9.11E-10    |
| GENEBODY | GPR171 | 3  | 150916446                                                               | 1 | cg15715853                                                                              | 0.763456085 | 0.561045239 | 0.4579293   | -0.305526785 | 2.05E-14    | 2.37E-11    |
| GENEBODY | GPR65  | 14 | 88477518                                                                | 1 | cg18185987                                                                              | 0.568922755 | 0.4569447   | 0.390321795 | -0.17860096  | 1.53E-10    | 3.34E-09    |
| GENEBODY | GPR84  | 12 | 54756590                                                                | 1 | cg10668189                                                                              | 0.731711015 | 0.648057883 | 0.510367568 | -0.221343447 | 1.15E-08    | 9.96E-08    |
| GENEBODY | GPR85  | 7  | 112724674                                                               | 1 | cg14511782                                                                              | 0.63689156  | 0.522556367 | 0.39373755  | -0.24315401  | 1.49E-07    | 8.88E-07    |
| GENEBODY | GPX7   | 1  | 53068587/53072410/53068834/53068579                                     | 4 | cg02453146/cg0333022/cg09161043/cg23272399                                              | 0.362997962 | 0.433848498 | 0.524766123 | 0.161768161  | 4.63E-06    | 1.85E-05    |
| GENEBODY | GRAP2  | 22 | 40355732                                                                | 1 | cg17988310                                                                              | 0.493742515 | 0.357406589 | 0.263253495 | -0.23048902  | 5.62E-09    | 5.53E-08    |
| GENEBODY | GREB1L | 18 | 19024872                                                                | 1 | cg07490808                                                                              | 0.598833015 | 0.462903861 | 0.331397841 | -0.267435174 | 1.52E-11    | 7.24E-10    |
| GENEBODY | GRIA1  | 5  | 153160425/153038077/153039227/152896564/152949095/153008721             | 6 | cg07601741/cg13583454/cg19752602/cg22798121/cg23165500/cg26343183                       | 0.592354828 | 0.489614514 | 0.377359989 | -0.214994839 | 1.06E-12    | 1.51E-10    |
| GENEBODY | GSC    | 14 | 95235125/95235489/95235026/95235127/95235968/95234965/95235869/95235402 | 8 | cg01163842/cg01533258/cg02948476/cg07785447/cg13252307/cg18687675/cg20804555/cg21063282 | 0.262750923 | 0.281539885 | 0.443667865 | 0.180916943  | 0.000815909 | 0.001959876 |
| GENEBODY | GSC2   | 22 | 19137306/19137222/19136844/19136922/19137371                            | 5 | cg20209308/cg21384203/cg21854621/cg24926361/cg26599006                                  | 0.211347241 | 0.266278984 | 0.388174846 | 0.176827605  | 3.54E-06    | 1.45E-05    |
| GENEBODY | GSS    | 20 | 33539306                                                                | 1 | cg13607138                                                                              | 0.721902275 | 0.595800028 | 0.451020814 | -0.270881461 | 1.57E-07    | 9.29E-07    |
| GENEBODY | GSTM1  | 1  | 110230545/110230633/110233940                                           | 3 | cg06632762/cg10950028/cg23241950                                                        | 0.405541355 | 0.529260925 | 0.595818757 | 0.190277402  | 1.52E-06    | 6.87E-06    |
| GENEBODY | GSTM2  | 1  | 110210925/110211023/110210913/110214317                                 | 4 | cg03942855/cg06615940/cg16670497/cg20944548                                             | 0.448848321 | 0.565330139 | 0.639534299 | 0.190685978  | 1.31E-09    | 1.67E-08    |
| GENEBODY | GSTTP1 | 22 | 24345907                                                                | 1 | cg10678937                                                                              | 0.703289985 | 0.615674606 | 0.544561173 | -0.158728812 | 1.86E-10    | 3.83E-09    |
| GENEBODY | GSX1   | 13 | 28367245/28367741                                                       | 2 | cg05967403/cg14367229                                                                   | 0.487558255 | 0.572149678 | 0.69866592  | 0.211107665  | 8.55E-10    | 1.20E-08    |
| GENEBODY | GTSF1L | 20 | 42354942                                                                | 1 | cg23727943                                                                              | 0.70171297  | 0.580374411 | 0.485231582 | -0.216481388 | 2.58E-12    | 2.60E-10    |

|          |        |    |                                                                                                                                                                                                                                                                                                                                                                                                                                                   |   |                                                                                                                                                                                                                                                                                                                                                                                                                                                                                                                                          |             |             |             |              |             |            |
|----------|--------|----|---------------------------------------------------------------------------------------------------------------------------------------------------------------------------------------------------------------------------------------------------------------------------------------------------------------------------------------------------------------------------------------------------------------------------------------------------|---|------------------------------------------------------------------------------------------------------------------------------------------------------------------------------------------------------------------------------------------------------------------------------------------------------------------------------------------------------------------------------------------------------------------------------------------------------------------------------------------------------------------------------------------|-------------|-------------|-------------|--------------|-------------|------------|
| GENEBODY | HAND2  | 4  | 174449488/174448<br>841/174448705/174 5<br>449827/174448549                                                                                                                                                                                                                                                                                                                                                                                       |   | cg04771946/cg05155<br>840/cg08297751/cg1<br>6162058/cg24974365                                                                                                                                                                                                                                                                                                                                                                                                                                                                           | 0.279087092 | 0.322111562 | 0.458464645 | 0.179377553  | 1.38E-05    | 4.89E-05   |
| GENEBODY | HAPLN1 | 5  | 82949588                                                                                                                                                                                                                                                                                                                                                                                                                                          | 1 | cg11215486                                                                                                                                                                                                                                                                                                                                                                                                                                                                                                                               | 0.39758257  | 0.364209967 | 0.233645232 | -0.163937338 | 3.50E-07    | 1.90E-06   |
| GENEBODY | HAS2   | 8  | 122639115                                                                                                                                                                                                                                                                                                                                                                                                                                         | 1 | cg20146177                                                                                                                                                                                                                                                                                                                                                                                                                                                                                                                               | 0.547846495 | 0.640625172 | 0.697897782 | 0.150051287  | 1.56E-08    | 1.30E-07   |
| GENEBODY | HAVCR2 | 5  | 156516798                                                                                                                                                                                                                                                                                                                                                                                                                                         | 1 | cg19063654                                                                                                                                                                                                                                                                                                                                                                                                                                                                                                                               | 0.65704751  | 0.554231283 | 0.450546559 | -0.206500951 | 3.83E-11    | 1.30E-09   |
| GENEBODY | HBBP1  | 11 | 5263432                                                                                                                                                                                                                                                                                                                                                                                                                                           | 1 | cg04161236                                                                                                                                                                                                                                                                                                                                                                                                                                                                                                                               | 0.6683465   | 0.518537633 | 0.364920186 | -0.303426314 | 2.78E-11    | 1.07E-09   |
| GENEBODY | HBG1   | 11 | 5270556                                                                                                                                                                                                                                                                                                                                                                                                                                           | 1 | cg18768582                                                                                                                                                                                                                                                                                                                                                                                                                                                                                                                               | 0.463221075 | 0.343144089 | 0.241405668 | -0.221815407 | 9.11E-11    | 2.26E-09   |
| GENEBODY | HBM    | 16 | 216626/216450/216<br>244/216100                                                                                                                                                                                                                                                                                                                                                                                                                   | 4 | cg03309232/cg04141<br>813/cg21664030/cg2<br>6976732                                                                                                                                                                                                                                                                                                                                                                                                                                                                                      | 0.233676223 | 0.274872456 | 0.389071992 | 0.155395769  | 0.000164249 | 0.00045836 |
| GENEBODY | HCG4   | 6  | 29760784/2976076<br>9/29760505/297607<br>73/29760634/29760<br>028/29760096/2975<br>9947/29759949/297<br>60681/29760675/29<br>759078/29760782/2<br>9760757/29760148/<br>29760447/2976083<br>2/29760754/297608<br>05/29760023/29760 39<br>435/29760158/2976<br>0410/29760688/297<br>60695/29759955/29<br>759197/29760164/2<br>9760090/29759972/<br>29760609/2976065<br>9/29760823/297597<br>29/29759718/29760<br>765/29760495/2975<br>9804/29760713 |   | cg00030176/cg00142<br>106/cg00501272/cg0<br>4214566/cg05216332<br>/cg05907976/cg0745<br>7785/cg08560874/cg<br>08696107/cg0886746<br>4/cg09112760/cg110<br>36359/cg11232276/c<br>g11278602/cg117531<br>55/cg11901272/cg11<br>973623/cg12154624/<br>cg13300282/cg13321<br>114/cg13497563/cg1<br>3688808/cg14443519<br>/cg14652056/cg1664<br>0496/cg16787652/cg<br>17068675/cg1739464<br>9/cg17512365/cg176<br>70496/cg18299938/c<br>g18457685/cg210394<br>95/cg22053721/cg22<br>499139/cg22903300/<br>cg23849169/cg24621<br>922/cg27012994 | 0.254701587 | 0.3421145   | 0.423188742 | 0.168487155  | 7.27E-09    | 6.79E-08   |
| GENEBODY | HCLS1  | 3  | 121363104                                                                                                                                                                                                                                                                                                                                                                                                                                         | 1 | cg18546037                                                                                                                                                                                                                                                                                                                                                                                                                                                                                                                               | 0.797833285 | 0.715467333 | 0.58815315  | -0.209680135 | 1.92E-07    | 1.12E-06   |
| GENEBODY | HELB   | 12 | 66697621/6669728<br>1                                                                                                                                                                                                                                                                                                                                                                                                                             | 2 | cg06239064/cg22546<br>775                                                                                                                                                                                                                                                                                                                                                                                                                                                                                                                | 0.528376855 | 0.431749483 | 0.375059736 | -0.153317119 | 1.09E-08    | 9.50E-08   |



|          |           |    |                                                                                                                                                                                                                                  |    |                                                                                                                                                                                                                                                                                    |             |             |             |              |          |          |
|----------|-----------|----|----------------------------------------------------------------------------------------------------------------------------------------------------------------------------------------------------------------------------------|----|------------------------------------------------------------------------------------------------------------------------------------------------------------------------------------------------------------------------------------------------------------------------------------|-------------|-------------|-------------|--------------|----------|----------|
| GENEBODY | HELT      | 4  | 185940595/185941265/185941304/185941625/185941601/185940969/185940549/185941088/185940638/185940923                                                                                                                              | 10 | cg00075634/cg00939735/cg04905049/cg06274396/cg10463150/cg11497952/cg13966883/cg17081772/cg18065811/cg22848896                                                                                                                                                                      | 0.229381335 | 0.271655583 | 0.434679543 | 0.205298208  | 2.47E-06 | 1.06E-05 |
| GENEBODY | HGF       | 7  | 81391327/81381353/81372100                                                                                                                                                                                                       | 3  | cg16033274/cg18944653/cg23269320                                                                                                                                                                                                                                                   | 0.67146914  | 0.587581372 | 0.471089761 | -0.200379379 | 5.48E-08 | 3.73E-07 |
| GENEBODY | HLA-DQA2  | 6  | 32712093/32710583/32709470/32711008/32710209/32713018/32712979/32713188/32711632/32710516/32711617/32713607/32711102/32711889/32714066/32712103/32712045/32710506/32711028/32709511/32713827/32712930/32710933/32713044/32709909 | 25 | cg00334532/cg01050736/cg01244342/cg02293354/cg03127506/cg04493778/cg05428452/cg06293782/cg06598146/cg10023855/cg10645648/cg14740554/cg15496763/cg17471365/cg17776207/cg18572898/cg18785140/cg19350679/cg22097941/cg22282941/cg22812614/cg23117647/cg23221363/cg23870181/cg26489369 | 0.725793465 | 0.626579453 | 0.537769412 | -0.188024053 | 5.88E-11 | 1.68E-09 |
| GENEBODY | HMGCS2    | 1  | 120310021                                                                                                                                                                                                                        | 1  | cg24482350                                                                                                                                                                                                                                                                         | 0.502739765 | 0.3791392   | 0.314991545 | -0.18774822  | 8.02E-08 | 5.19E-07 |
| GENEBODY | HMHB1     | 5  | 143192067/143192588                                                                                                                                                                                                              | 2  | cg02228160/cg06471487                                                                                                                                                                                                                                                              | 0.775363425 | 0.65827975  | 0.529884091 | -0.245479334 | 1.80E-09 | 2.19E-08 |
| GENEBODY | HNRNPA3P1 | 10 | 44285864                                                                                                                                                                                                                         | 1  | cg04625975                                                                                                                                                                                                                                                                         | 0.584867215 | 0.477091261 | 0.387502164 | -0.197365051 | 4.71E-08 | 3.27E-07 |
| GENEBODY | HNRNPH3   | 10 | 70098420                                                                                                                                                                                                                         | 1  | cg14517144                                                                                                                                                                                                                                                                         | 0.72739177  | 0.594846811 | 0.561025355 | -0.166366415 | 7.31E-11 | 1.94E-09 |
| GENEBODY | HORMAD2   | 22 | 30552801                                                                                                                                                                                                                         | 1  | cg10230314                                                                                                                                                                                                                                                                         | 0.448995555 | 0.33445175  | 0.286113841 | -0.162881714 | 2.70E-09 | 3.05E-08 |
| GENEBODY | HOXA2     | 7  | 27140797/27141067/27140942/27141388/27141088/27141139                                                                                                                                                                            | 6  | cg00188704/cg02803819/cg03763508/cg06786372/cg13661519/cg21464565                                                                                                                                                                                                                  | 0.564760608 | 0.65107556  | 0.823423477 | 0.258662868  | 5.60E-11 | 1.64E-09 |
| GENEBODY | HOXA3     | 7  | 27150042/27147590/27150031/27149139/27148204/27148002                                                                                                                                                                            | 6  | cg02439266/cg07153966/cg09591524/cg09865454/cg17800708/cg19048532                                                                                                                                                                                                                  | 0.699223326 | 0.749983822 | 0.860057127 | 0.160833801  | 5.45E-10 | 8.53E-09 |

|          |         |    |                                                                                                  |   |                                                                                                                        |             |             |             |              |          |             |
|----------|---------|----|--------------------------------------------------------------------------------------------------|---|------------------------------------------------------------------------------------------------------------------------|-------------|-------------|-------------|--------------|----------|-------------|
| GENEBODY | HOXC11  | 12 | 54368639/5436782<br>2/54368332/543691<br>02/54368272/54368<br>203                                | 6 | cg02510471/cg04203<br>883/cg07035173/cg1<br>2599390/cg13855243<br>/cg17273416                                          | 0.313997705 | 0.385290205 | 0.46476603  | 0.150768326  | 4.40E-05 | 0.000139143 |
| GENEBODY | HOXC13  | 12 | 54337929/5433882<br>4/54333587/543389<br>37/54336246/54338<br>743/54333565/5433<br>3823          | 8 | cg00059246/cg08803<br>500/cg15611413/cg2<br>0104341/cg20959780<br>/cg23922739/cg2409<br>4550/cg25936147                | 0.276702051 | 0.334645964 | 0.444672973 | 0.167970922  | 8.45E-07 | 4.13E-06    |
| GENEBODY | HOXC4   | 12 | 54447807/5444872<br>9/54448090/544487<br>69/54448913/54448<br>265/54447873                       | 7 | cg01524853/cg03146<br>625/cg11746813/cg1<br>5648389/cg16370398<br>/cg18473521/cg2274<br>7076                           | 0.32349022  | 0.436043073 | 0.54035221  | 0.21686199   | 5.69E-09 | 5.57E-08    |
| GENEBODY | HOXD1   | 2  | 177054573/177054<br>306                                                                          | 2 | cg02466815/cg02746<br>725                                                                                              | 0.444847885 | 0.519767193 | 0.65491423  | 0.210066345  | 5.06E-08 | 3.48E-07    |
| GENEBODY | HOXD12  | 2  | 176965435                                                                                        | 1 | cg03371669                                                                                                             | 0.513124795 | 0.563995711 | 0.673270295 | 0.1601455    | 4.26E-07 | 2.25E-06    |
| GENEBODY | HSD11B2 | 16 | 67466260/6746775<br>1/67465455/674654<br>61                                                      | 4 | cg01443318/cg02734<br>600/cg07724674/cg2<br>0981893                                                                    | 0.649359768 | 0.564178772 | 0.485042457 | -0.164317311 | 3.13E-10 | 5.61E-09    |
| GENEBODY | HTR2B   | 2  | 231977049                                                                                        | 1 | cg12793238                                                                                                             | 0.87486977  | 0.764924728 | 0.670620395 | -0.204249375 | 2.59E-06 | 1.10E-05    |
| GENEBODY | HTR3B   | 11 | 113778771/113775<br>900/113779788/113<br>778957/113804386/<br>113779936                          | 6 | cg01614101/cg06961<br>323/cg17637877/cg1<br>7647537/cg21960184<br>/cg23851685                                          | 0.753256203 | 0.673635144 | 0.573436249 | -0.179819954 | 1.74E-11 | 7.86E-10    |
| GENEBODY | HYALP1  | 7  | 123459295                                                                                        | 1 | cg09630417                                                                                                             | 0.52883965  | 0.392865139 | 0.291143045 | -0.237696605 | 2.63E-10 | 4.93E-09    |
| GENEBODY | IBTK    | 6  | 82946781/8289896<br>3                                                                            | 2 | cg14154456/ch.6.167<br>8538R                                                                                           | 0.621618835 | 0.515131694 | 0.459971168 | -0.161647667 | 6.06E-06 | 2.35E-05    |
| GENEBODY | ICAM2   | 17 | 62083407                                                                                         | 1 | cg07918509                                                                                                             | 0.53180796  | 0.450048789 | 0.342392455 | -0.189415505 | 1.78E-08 | 1.45E-07    |
| GENEBODY | ICOS    | 2  | 204822542                                                                                        | 1 | cg15247069                                                                                                             | 0.781445035 | 0.6497174   | 0.470782023 | -0.310663012 | 1.31E-10 | 2.96E-09    |
| GENEBODY | IFLTD1  | 12 | 25649090/2570586<br>1/25656194/257075<br>64/25705953/25707<br>667/25644389/2570<br>5290/25707569 | 9 | cg06680863/cg10412<br>312/cg11130955/cg1<br>3134916/cg15461781<br>/cg15758700/cg2125<br>4753/cg23435916/cg<br>24850296 | 0.584742941 | 0.495047946 | 0.42587064  | -0.158872301 | 7.48E-11 | 1.96E-09    |
| GENEBODY | IGFBP6  | 12 | 53491850/5349594<br>5/53492662                                                                   | 3 | cg06408864/cg16748<br>326/cg23841186                                                                                   | 0.45006956  | 0.379769222 | 0.295921295 | -0.154148265 | 1.39E-07 | 8.37E-07    |
| GENEBODY | IGFL3   | 19 | 46624887                                                                                         | 1 | cg18249535                                                                                                             | 0.71493229  | 0.631810233 | 0.554645082 | -0.160287208 | 4.83E-06 | 1.91E-05    |

|          |         |    |                                                                                                                                                     |    |                                                                                                                                                                 |             |             |             |              |          |          |
|----------|---------|----|-----------------------------------------------------------------------------------------------------------------------------------------------------|----|-----------------------------------------------------------------------------------------------------------------------------------------------------------------|-------------|-------------|-------------|--------------|----------|----------|
| GENEBODY | IGLON5  | 19 | 51827007/5181528<br>1/51830634/518304<br>77/51831274/51815<br>373/51818377/5183<br>0311/51815359/518<br>29984/51815658/51<br>830960                 | 12 | cg01592198/cg05630<br>016/cg06667574/cg0<br>7382943/cg08874512<br>/cg09928766/cg1138<br>1655/cg15985184/cg<br>16980637/cg1836391<br>8/cg18568930/cg197<br>25343 | 0.404835151 | 0.452983636 | 0.577810053 | 0.172974903  | 3.90E-07 | 2.08E-06 |
| GENEBODY | IL1F10  | 2  | 113831203                                                                                                                                           | 1  | cg24553058                                                                                                                                                      | 0.714798375 | 0.657362644 | 0.532581105 | -0.18221727  | 6.20E-06 | 2.39E-05 |
| GENEBODY | IL22RA2 | 6  | 137477184                                                                                                                                           | 1  | cg23507945                                                                                                                                                      | 0.50142394  | 0.388849    | 0.346411709 | -0.155012231 | 1.72E-05 | 5.97E-05 |
| GENEBODY | IL2RB   | 22 | 37536156                                                                                                                                            | 1  | cg22327543                                                                                                                                                      | 0.6707666   | 0.570526994 | 0.402161141 | -0.268605459 | 2.73E-09 | 3.07E-08 |
| GENEBODY | IL5RA   | 3  | 3134102/3135232/3<br>133700/3135242/31<br>23308/3134187                                                                                             | 6  | cg08119928/cg09558<br>975/cg15621546/cg1<br>9376823/cg23828301<br>/cg25791578                                                                                   | 0.789146337 | 0.710186732 | 0.628513976 | -0.160632361 | 1.01E-08 | 8.97E-08 |
| GENEBODY | IL7R    | 5  | 35860337                                                                                                                                            | 1  | cg01027405                                                                                                                                                      | 0.47155128  | 0.320009517 | 0.238115591 | -0.233435689 | 1.02E-13 | 4.92E-11 |
| GENEBODY | IMPG2   | 3  | 101010124/100990<br>781/100970896                                                                                                                   | 3  | cg08660810/cg12249<br>537/cg27318481                                                                                                                            | 0.69985965  | 0.634552039 | 0.546051232 | -0.153808418 | 1.86E-06 | 8.19E-06 |
| GENEBODY | INTU    | 4  | 128630266                                                                                                                                           | 1  | cg07752095                                                                                                                                                      | 0.72256302  | 0.666802833 | 0.550397614 | -0.172165406 | 5.15E-06 | 2.02E-05 |
| GENEBODY | IPW     | 15 | 25362188                                                                                                                                            | 1  | cg06121514                                                                                                                                                      | 0.706685335 | 0.637791933 | 0.513800109 | -0.192885226 | 2.35E-05 | 7.87E-05 |
| GENEBODY | IQUB    | 7  | 123141765                                                                                                                                           | 1  | cg14472291                                                                                                                                                      | 0.4881498   | 0.377944178 | 0.24839861  | -0.23975119  | 3.53E-09 | 3.78E-08 |
| GENEBODY | IRF7    | 11 | 612680/612837/614<br>761/613632/613792<br>/613478/614787/61<br>2762                                                                                 | 8  | cg03755158/cg05309<br>505/cg08926253/cg1<br>6486109/cg17114584<br>/cg20989454/cg2201<br>6995/cg27271532                                                         | 0.506447648 | 0.414499535 | 0.356433314 | -0.150014334 | 3.84E-10 | 6.52E-09 |
| GENEBODY | IRS2    | 13 | 110424686/110434<br>016/110425835/110<br>431612/110431691/<br>110424497/110424<br>782/110432220/110<br>433636/110412178/<br>110433784/110432<br>935 | 12 | cg01156012/cg01569<br>664/cg08348990/cg1<br>1153485/cg12085119<br>/cg12195446/cg1353<br>9803/cg20445402/cg<br>21266798/cg2160149<br>3/cg24526103/cg259<br>24746 | 0.748918938 | 0.632823224 | 0.57466497  | -0.174253969 | 9.51E-08 | 6.03E-07 |

|          |          |    |                                                                                                                                         |    |                                                                                                                                                                                           |              |             |             |              |          |          |
|----------|----------|----|-----------------------------------------------------------------------------------------------------------------------------------------|----|-------------------------------------------------------------------------------------------------------------------------------------------------------------------------------------------|--------------|-------------|-------------|--------------|----------|----------|
| GENEBODY | IRX1     | 5  | 3599686/3599012/3<br>600391/3596704/35<br>97487/3597311/359<br>8967/3599090/3597<br>695/3598319/35969<br>96/3600572/359971<br>9/3597760 | 14 | cg01294808/cg04302<br>194/cg04365721/cg0<br>6060135/cg07881405<br>/cg08492173/cg0874<br>6900/cg09731996/cg<br>11605835/cg1246823<br>8/cg15505412/cg181<br>00702/cg18635552/c<br>g25410785 | 0.330609232  | 0.417503458 | 0.558162184 | 0.227552952  | 5.23E-10 | 8.28E-09 |
| GENEBODY | IRX5     | 16 | 54966837/5496592<br>9/54965492/549658<br>95/54967389/54967<br>714/54967024/5496<br>6471                                                 | 8  | cg01901262/cg03665<br>761/cg05266781/cg0<br>7254066/cg09492451<br>/cg10824810/cg1637<br>6108/cg16642791                                                                                   | 0.397374316  | 0.46151088  | 0.631797325 | 0.234423008  | 7.88E-10 | 1.13E-08 |
| GENEBODY | ISLR2    | 15 | 74425552/7442692<br>5/74426334/744272<br>34/74426086/74426<br>273/74427239/7442<br>6957/74425757                                        | 9  | cg01178680/cg03689<br>324/cg03895392/cg1<br>3113525/cg13242000<br>/cg20314548/cg2578<br>9916/cg25833989/cg<br>27552679                                                                    | 0.313424293  | 0.342196129 | 0.468127702 | 0.154703409  | 5.16E-07 | 2.67E-06 |
| GENEBODY | ITLN1    | 1  | 160850377                                                                                                                               | 1  | cg07177437                                                                                                                                                                                | 0.67076678   | 0.505370678 | 0.445825432 | -0.224941348 | 4.89E-10 | 7.87E-09 |
| GENEBODY | IVL      | 1  | 152882420                                                                                                                               | 1  | cg02855850                                                                                                                                                                                | 0.509808775  | 0.381492039 | 0.274810236 | -0.234998539 | 5.78E-13 | 1.09E-10 |
| GENEBODY | JAM2     | 21 | 27015734/2701287<br>8/27012313/270126<br>15                                                                                             | 4  | cg01975706/cg04964<br>944/cg06479755/cg2<br>6412722                                                                                                                                       | 0.322996433  | 0.396177302 | 0.519552811 | 0.196556377  | 1.77E-07 | 1.04E-06 |
| GENEBODY | KCNA2    | 1  | 111147106                                                                                                                               | 1  | cg02076848                                                                                                                                                                                | 0.8211111415 | 0.764080556 | 0.627981077 | -0.193130338 | 2.02E-06 | 8.84E-06 |
| GENEBODY | KCND2    | 7  | 120380099/120059<br>583/120142732/119<br>915979/120362441/<br>119945494                                                                 | 6  | cg01367751/cg12307<br>557/cg18645002/cg2<br>2572258/cg22887467<br>/cg25822376                                                                                                             | 0.765192823  | 0.69088387  | 0.607416806 | -0.157776017 | 1.70E-10 | 3.60E-09 |
| GENEBODY | KCNJ1    | 11 | 128711233/128710<br>122                                                                                                                 | 2  | cg25751961/cg25893<br>560                                                                                                                                                                 | 0.81504113   | 0.693855561 | 0.592575011 | -0.222466119 | 5.99E-11 | 1.70E-09 |
| GENEBODY | KCNK18   | 10 | 118957259                                                                                                                               | 1  | cg07637239                                                                                                                                                                                | 0.520687035  | 0.429026122 | 0.327734136 | -0.192952899 | 2.50E-08 | 1.91E-07 |
| GENEBODY | KDELR3   | 22 | 38864868/3886674<br>3                                                                                                                   | 2  | cg01640635/cg22024<br>572                                                                                                                                                                 | 0.89051643   | 0.823748914 | 0.724423216 | -0.166093214 | 1.02E-08 | 9.05E-08 |
| GENEBODY | KHDC1    | 6  | 73951939                                                                                                                                | 1  | cg04303920                                                                                                                                                                                | 0.703446895  | 0.580690206 | 0.493696141 | -0.209750754 | 7.43E-09 | 6.92E-08 |
| GENEBODY | KIAA0125 | 14 | 106390641/106394<br>764                                                                                                                 | 2  | cg02507952/cg15349<br>304                                                                                                                                                                 | 0.657353515  | 0.578342497 | 0.505681634 | -0.151671881 | 2.80E-10 | 5.16E-09 |
| GENEBODY | KIAA0406 | 20 | 36621697                                                                                                                                | 1  | cg10626556                                                                                                                                                                                | 0.50913721   | 0.396869033 | 0.294662441 | -0.214474769 | 3.46E-12 | 3.01E-10 |
| GENEBODY | KIAA0495 | 1  | 3661862                                                                                                                                 | 1  | cg14912788                                                                                                                                                                                | 0.81316239   | 0.718901144 | 0.526893782 | -0.286268608 | 6.92E-11 | 1.86E-09 |

|          |          |    |                                                                         |   |                                                                               |             |             |             |              |          |          |
|----------|----------|----|-------------------------------------------------------------------------|---|-------------------------------------------------------------------------------|-------------|-------------|-------------|--------------|----------|----------|
| GENEBODY | KIAA0748 | 12 | 55362424/5536824<br>4                                                   | 2 | cg02710015/cg06352<br>538                                                     | 0.702532575 | 0.519941144 | 0.423248273 | -0.279284302 | 8.45E-09 | 7.68E-08 |
| GENEBODY | KIAA1045 | 9  | 34977523                                                                | 1 | cg14380939                                                                    | 0.33507383  | 0.240988478 | 0.175054416 | -0.160019414 | 7.83E-12 | 4.75E-10 |
| GENEBODY | KIF3B    | 20 | 30914444                                                                | 1 | cg11261691                                                                    | 0.54080805  | 0.425990672 | 0.323157082 | -0.217650968 | 6.34E-11 | 1.77E-09 |
| GENEBODY | KLHL24   | 3  | 183382726                                                               | 1 | cg02628016                                                                    | 0.60900404  | 0.477955339 | 0.382027473 | -0.226976567 | 5.36E-10 | 8.41E-09 |
| GENEBODY | KLK5     | 19 | 51446953                                                                | 1 | cg11855156                                                                    | 0.82022472  | 0.703309244 | 0.57214575  | -0.24807897  | 6.44E-07 | 3.25E-06 |
| GENEBODY | KLK9     | 19 | 51508927/5150688<br>8                                                   | 2 | cg07798605/cg20103<br>311                                                     | 0.48368356  | 0.377226342 | 0.281888639 | -0.201794921 | 8.22E-11 | 2.10E-09 |
| GENEBODY | KNG1     | 3  | 186458131/186460<br>384                                                 | 2 | cg10773224/cg27376<br>355                                                     | 0.847853335 | 0.757162011 | 0.654905105 | -0.19294823  | 5.08E-10 | 8.09E-09 |
| GENEBODY | KRT14    | 17 | 39739598/3973954<br>1/39739912/397398<br>60/39739524                    | 5 | cg03508348/cg05376<br>477/cg06339505/cg1<br>2362508/cg15748407                | 0.828138185 | 0.673960283 | 0.631046352 | -0.197091833 | 4.00E-10 | 6.72E-09 |
| GENEBODY | KRT18    | 12 | 53343849/5334351<br>4/53344746/533437<br>03/53343105/53344<br>573       | 6 | cg04799958/cg07652<br>628/cg11698119/cg1<br>4212748/cg22221657<br>/cg24969443 | 0.4911653   | 0.396120811 | 0.316656439 | -0.174508861 | 6.68E-11 | 1.84E-09 |
| GENEBODY | KRT4     | 12 | 53200975                                                                | 1 | cg21182263                                                                    | 0.71473191  | 0.686663217 | 0.534418023 | -0.180313887 | 9.49E-06 | 3.50E-05 |
| GENEBODY | KRT71    | 12 | 52938420                                                                | 1 | cg08186915                                                                    | 0.57539468  | 0.496847144 | 0.415035227 | -0.160359453 | 2.14E-08 | 1.68E-07 |
| GENEBODY | KRT78    | 12 | 53241452                                                                | 1 | cg19484680                                                                    | 0.83751809  | 0.747393283 | 0.672402768 | -0.165115322 | 1.20E-07 | 7.36E-07 |
| GENEBODY | KRTDAP   | 19 | 35981224                                                                | 1 | cg05241571                                                                    | 0.702843185 | 0.613275333 | 0.50759995  | -0.195243235 | 4.85E-08 | 3.36E-07 |
| GENEBODY | LACRT    | 12 | 55028545                                                                | 1 | cg10125195                                                                    | 0.679076895 | 0.582964378 | 0.495928995 | -0.1831479   | 1.57E-08 | 1.30E-07 |
| GENEBODY | LAIR2    | 19 | 55014357/5501961<br>9                                                   | 2 | cg01807649/cg24457<br>158                                                     | 0.59280262  | 0.511190433 | 0.405668055 | -0.187134565 | 2.02E-06 | 8.84E-06 |
| GENEBODY | LALBA    | 12 | 48963631/4896295<br>6                                                   | 2 | cg14338548/cg25953<br>788                                                     | 0.49071579  | 0.345169944 | 0.214784636 | -0.275931154 | 1.03E-12 | 1.50E-10 |
| GENEBODY | LASS4    | 19 | 8317932                                                                 | 1 | cg13393785                                                                    | 0.41950647  | 0.326546922 | 0.246700127 | -0.172806343 | 9.54E-11 | 2.34E-09 |
| GENEBODY | LBX1     | 10 | 102987483/102987<br>257/102988094/102<br>987407/102987993               | 5 | cg03053579/cg12646<br>649/cg14374861/cg1<br>5268691/cg19547319                | 0.316967662 | 0.364041074 | 0.489750283 | 0.172782622  | 6.08E-06 | 2.35E-05 |
| GENEBODY | LCN10    | 9  | 139634272/139635<br>449/139634196/139<br>636616/139636493/<br>139634063 | 6 | cg13731311/cg13754<br>355/cg14052065/cg1<br>4494421/cg14640244<br>/cg22588936 | 0.53322766  | 0.458821255 | 0.379749383 | -0.153478277 | 4.22E-11 | 1.35E-09 |
| GENEBODY | LCN6     | 9  | 139640325/139641<br>402/139640661/139<br>640053/139640884               | 5 | cg02522367/cg13752<br>460/cg13790576/cg1<br>4633329/cg23469878                | 0.695805427 | 0.603663529 | 0.529409373 | -0.166396054 | 6.46E-12 | 4.27E-10 |

|          |              |    |                                                                                                                                                                                                                                                                                                                                           |    |                                                                                                                                                                                                                                                                                                                                                                                                                   |             |             |             |              |             |             |
|----------|--------------|----|-------------------------------------------------------------------------------------------------------------------------------------------------------------------------------------------------------------------------------------------------------------------------------------------------------------------------------------------|----|-------------------------------------------------------------------------------------------------------------------------------------------------------------------------------------------------------------------------------------------------------------------------------------------------------------------------------------------------------------------------------------------------------------------|-------------|-------------|-------------|--------------|-------------|-------------|
| GENEBODY | LCP2         | 5  | 169695565/169695<br>483/169706238/169<br>713179/169693176/<br>169720975                                                                                                                                                                                                                                                                   | 6  | cg05265596/cg08748<br>308/cg17752270/cg2<br>1748244/cg26104475<br>/cg26518932                                                                                                                                                                                                                                                                                                                                     | 0.559571199 | 0.470114428 | 0.383199486 | -0.176371712 | 3.77E-10    | 6.44E-09    |
| GENEBODY | LETM2        | 8  | 38260675                                                                                                                                                                                                                                                                                                                                  | 1  | cg26232451                                                                                                                                                                                                                                                                                                                                                                                                        | 0.582946025 | 0.496236939 | 0.424657932 | -0.158288093 | 1.13E-09    | 1.49E-08    |
| GENEBODY | LHX8         | 1  | 75602857/7559953<br>2/75596758/755973<br>04/75596930/75600<br>124/75599645/7560<br>0250/75602412/756<br>02167/75600421/75<br>598280/75598070/7<br>5599667/75598039/<br>75602846/7559672<br>4/75596827/756003<br>99/75602925/75597<br>485/75602451/7560<br>6694/75600224/756<br>01276/75600391/75<br>597887/75601120/7<br>5600685/75600941 | 30 | cg00145253/cg00681<br>106/cg02861380/cg0<br>3326762/cg03445694<br>/cg05352087/cg0661<br>5678/cg07404921/cg<br>08146483/cg0827273<br>1/cg10095577/cg102<br>37044/cg11750396/c<br>g11842415/cg124356<br>29/cg12764034/cg13<br>478928/cg13492103/<br>cg13691003/cg14035<br>231/cg14613402/cg1<br>4832406/cg18876007<br>/cg19411474/cg1976<br>4599/cg23166389/cg<br>23845450/cg2395266<br>3/cg25368122/cg263<br>09264 | 0.291892009 | 0.376153695 | 0.50515138  | 0.213259371  | 1.09E-08    | 9.52E-08    |
| GENEBODY | LOC100128288 | 17 | 8263420                                                                                                                                                                                                                                                                                                                                   | 1  | cg08906309                                                                                                                                                                                                                                                                                                                                                                                                        | 0.63322548  | 0.475523    | 0.337774082 | -0.295451398 | 3.37E-11    | 1.19E-09    |
| GENEBODY | LOC100169752 | 10 | 127263501                                                                                                                                                                                                                                                                                                                                 | 1  | cg02173583                                                                                                                                                                                                                                                                                                                                                                                                        | 0.63245405  | 0.598162822 | 0.472293395 | -0.160160655 | 0.000206737 | 0.000563872 |
| GENEBODY | LOC100190940 | 12 | 130526797/130524<br>707                                                                                                                                                                                                                                                                                                                   | 2  | cg07630723/cg08968<br>978                                                                                                                                                                                                                                                                                                                                                                                         | 0.4644509   | 0.539078339 | 0.621005714 | 0.156554814  | 1.68E-06    | 7.52E-06    |
| GENEBODY | LOC100192379 | 4  | 122686432/122686<br>453/122686269/122<br>686493/122686456/<br>122687552/122686<br>038/122686602/122<br>686319/122687481/<br>122686564/122686<br>667                                                                                                                                                                                       | 12 | cg03227184/cg04638<br>468/cg05396987/cg0<br>7978472/cg08553437<br>/cg10423757/cg1086<br>3741/cg16733855/cg<br>21077559/cg2154458<br>5/cg24912438/cg275<br>16568                                                                                                                                                                                                                                                   | 0.375727689 | 0.474573992 | 0.604359631 | 0.228631942  | 2.41E-10    | 4.63E-09    |
| GENEBODY | LOC100192426 | 18 | 8364304/8366955                                                                                                                                                                                                                                                                                                                           | 2  | cg14579769/cg23436<br>819                                                                                                                                                                                                                                                                                                                                                                                         | 0.66974253  | 0.576310194 | 0.473511291 | -0.196231239 | 2.59E-08    | 1.97E-07    |

|          |           |    |                                                                                                                        |    |                                                                                                                                                  |             |             |             |              |          |          |
|----------|-----------|----|------------------------------------------------------------------------------------------------------------------------|----|--------------------------------------------------------------------------------------------------------------------------------------------------|-------------|-------------|-------------|--------------|----------|----------|
| GENEBODY | LOC145663 | 15 | 45671279/4567102<br>8/45671347/456710<br>18/45671708/45671<br>246/45671195/4567<br>1155/45671148/456<br>71016/45671001 | 11 | cg00767496/cg04025<br>675/cg04980849/cg0<br>5896902/cg06246941<br>/cg11032707/cg1574<br>4692/cg18435832/cg<br>20381115/cg2432853<br>9/cg26796135 | 0.566041589 | 0.649311005 | 0.716725618 | 0.150684029  | 3.20E-09 | 3.50E-08 |
| GENEBODY | LOC145820 | 15 | 95985725                                                                                                               | 1  | cg17048700                                                                                                                                       | 0.490771355 | 0.375637294 | 0.280933864 | -0.209837491 | 9.81E-14 | 4.89E-11 |
| GENEBODY | LOC200726 | 2  | 207511246                                                                                                              | 1  | cg15579926                                                                                                                                       | 0.760571855 | 0.677117689 | 0.504789355 | -0.2557825   | 4.27E-08 | 3.00E-07 |
| GENEBODY | LOC201651 | 3  | 151499380                                                                                                              | 1  | cg09683623                                                                                                                                       | 0.887488425 | 0.772692844 | 0.727886791 | -0.159601634 | 4.43E-08 | 3.10E-07 |
| GENEBODY | LOC282997 | 10 | 112628888                                                                                                              | 1  | cg24662666                                                                                                                                       | 0.47664464  | 0.55340505  | 0.662365536 | 0.185720896  | 1.12E-07 | 6.94E-07 |
| GENEBODY | LOC283392 | 12 | 72667236/7266551<br>0/72666264/726658<br>80/72666281/72666<br>976/72665376/7266<br>5282/72665771/726<br>67150          | 10 | cg01030121/cg01817<br>029/cg02511156/cg0<br>4775889/cg06622999<br>/cg13663218/cg1777<br>1605/cg18440199/cg<br>23142394/cg2757995<br>3            | 0.2548672   | 0.328457629 | 0.493095163 | 0.238227963  | 2.07E-07 | 1.19E-06 |
| GENEBODY | LOC283856 | 16 | 56224782/5615007<br>1/56224504/562249<br>01/56224627/56224<br>793/56221534                                             | 7  | cg00866976/cg00962<br>984/cg04156464/cg0<br>6728579/cg08613597<br>/cg10273340/cg2683<br>2183                                                     | 0.293019313 | 0.334235684 | 0.453282458 | 0.160263145  | 1.29E-06 | 5.98E-06 |
| GENEBODY | LOC283914 | 16 | 34625446/3459802<br>9                                                                                                  | 2  | cg03898993/cg26929<br>163                                                                                                                        | 0.58920205  | 0.527912472 | 0.395218659 | -0.193983391 | 5.49E-08 | 3.73E-07 |
| GENEBODY | LOC284749 | 20 | 46997755                                                                                                               | 1  | cg22849543                                                                                                                                       | 0.721923115 | 0.583982667 | 0.454996091 | -0.266927024 | 4.14E-09 | 4.30E-08 |
| GENEBODY | LOC284805 | 20 | 31239171                                                                                                               | 1  | cg26331247                                                                                                                                       | 0.46670876  | 0.331261439 | 0.237858136 | -0.228850624 | 2.62E-11 | 1.03E-09 |
| GENEBODY | LOC284837 | 21 | 45232232                                                                                                               | 1  | cg00546897                                                                                                                                       | 0.513421185 | 0.387064144 | 0.314571205 | -0.19884998  | 1.80E-11 | 7.99E-10 |
| GENEBODY | LOC285370 | 3  | 10801997                                                                                                               | 1  | cg07147846                                                                                                                                       | 0.489283015 | 0.353464739 | 0.231720641 | -0.257562374 | 3.82E-12 | 3.21E-10 |
| GENEBODY | LOC339568 | 20 | 37850248                                                                                                               | 1  | cg04742334                                                                                                                                       | 0.57372006  | 0.391180028 | 0.263340682 | -0.310379378 | 2.45E-12 | 2.58E-10 |
| GENEBODY | LOC388499 | 19 | 7944881                                                                                                                | 1  | cg20953510                                                                                                                                       | 0.82090899  | 0.697451539 | 0.554358145 | -0.266550845 | 1.93E-09 | 2.33E-08 |
| GENEBODY | LOC389705 | 9  | 14993466/1499358<br>4                                                                                                  | 2  | cg13974505/cg14052<br>511                                                                                                                        | 0.271212788 | 0.323456475 | 0.43013973  | 0.158926942  | 5.15E-07 | 2.66E-06 |
| GENEBODY | LOC401463 | 8  | 65489065/6548955<br>4/65488915/654886<br>40/65488839/65488<br>167/65488308/6548<br>9040/65489653/654<br>88069          | 10 | cg07283114/cg08188<br>993/cg08334899/cg1<br>4930884/cg15740363<br>/cg16510548/cg2191<br>7084/cg23554956/cg<br>23778149/cg2425537<br>1            | 0.238468107 | 0.309763284 | 0.438828974 | 0.200360867  | 7.71E-06 | 2.91E-05 |

|          |           |    |                                                                                 |   |                                                                                         |             |             |             |              |          |          |
|----------|-----------|----|---------------------------------------------------------------------------------|---|-----------------------------------------------------------------------------------------|-------------|-------------|-------------|--------------|----------|----------|
| GENEBODY | LOC642587 | 1  | 209604583/209605401/209604397/209605223/209602955/209605304/209605104/209604378 | 8 | cg01334432/cg03794445/cg05922993/cg12386297/cg14206882/cg17848546/cg17860090/cg27261597 | 0.694683624 | 0.606654352 | 0.502327369 | -0.192356255 | 3.21E-11 | 1.16E-09 |
| GENEBODY | LOC643406 | 20 | 5451900                                                                         | 1 | cg04281261                                                                              | 0.74304902  | 0.662902644 | 0.521782745 | -0.221266275 | 4.85E-07 | 2.53E-06 |
| GENEBODY | LOC643719 | 19 | 35068555/35068221                                                               | 2 | cg23200020/cg25418852                                                                   | 0.438227565 | 0.589002589 | 0.745249427 | 0.307021862  | 4.15E-10 | 6.92E-09 |
| GENEBODY | LOC643763 | 8  | 63895823                                                                        | 1 | cg26022010                                                                              | 0.52041584  | 0.420473333 | 0.348848123 | -0.171567717 | 1.14E-08 | 9.92E-08 |
| GENEBODY | LOC645851 | 17 | 26937650                                                                        | 1 | cg12560320                                                                              | 0.74944403  | 0.622230394 | 0.536892841 | -0.212551189 | 2.15E-09 | 2.54E-08 |
| GENEBODY | LOC647121 | 1  | 121261146/121261404/121261077/121261369/121261602/121305260                     | 6 | cg04374231/cg05827631/cg06970370/cg07794500/cg19165105/cg20769683                       | 0.323912622 | 0.489471651 | 0.5845832   | 0.260670578  | 7.51E-12 | 4.64E-10 |
| GENEBODY | LOC728989 | 1  | 146503900/146495202/146494928/146498485                                         | 4 | cg13951007/cg19504089/cg24735611/cg27533767                                             | 0.75537632  | 0.645891483 | 0.566257505 | -0.189118815 | 2.21E-09 | 2.60E-08 |
| GENEBODY | LOC84931  | 2  | 121223534/121223909/121223847/121223740                                         | 4 | cg07412254/cg17204557/cg21406402/cg23006519                                             | 0.533301478 | 0.396822489 | 0.314228018 | -0.219073459 | 1.66E-12 | 1.99E-10 |
| GENEBODY | LOR       | 1  | 153234037/153234342/153234268                                                   | 3 | cg08611411/cg11534293/cg21860629                                                        | 0.090814989 | 0.186863206 | 0.375520182 | 0.284705193  | 7.78E-06 | 2.93E-05 |
| GENEBODY | LPAR3     | 1  | 85313079/85288233/85313514/85331084                                             | 4 | cg07110659/cg15937525/cg21422605/cg24574111                                             | 0.69009625  | 0.606518324 | 0.524164918 | -0.165931332 | 1.07E-11 | 5.67E-10 |
| GENEBODY | LRRC18    | 10 | 50120250                                                                        | 1 | cg23211310                                                                              | 0.85665725  | 0.733184089 | 0.614679545 | -0.241977705 | 3.66E-10 | 6.28E-09 |
| GENEBODY | LRRC42    | 1  | 54423202                                                                        | 1 | cg20460166                                                                              | 0.431117675 | 0.345345439 | 0.270230618 | -0.160887057 | 1.02E-09 | 1.37E-08 |
| GENEBODY | LRRC4C    | 11 | 40136810                                                                        | 1 | cg00264754                                                                              | 0.612060085 | 0.479150444 | 0.376509877 | -0.235550208 | 1.31E-13 | 5.53E-11 |
| GENEBODY | LRRIQ3    | 1  | 74620779                                                                        | 1 | cg14795163                                                                              | 0.6588679   | 0.5388706   | 0.372009832 | -0.286858068 | 1.78E-09 | 2.18E-08 |
| GENEBODY | LY6G6D    | 6  | 31683352/31685440/31685494/31685430/31685575/31685392/31685491/31685542         | 8 | cg05218245/cg09409956/cg11165765/cg12951348/cg16271954/cg21952119/cg26015971/cg27248571 | 0.70397665  | 0.57882553  | 0.520170976 | -0.183805674 | 4.75E-08 | 3.29E-07 |
| GENEBODY | LY6H      | 8  | 144240945/144241434/144241120/144241104/144241407                               | 5 | cg00831710/cg02539855/cg09528449/cg10821845/cg23484951                                  | 0.332556566 | 0.417059477 | 0.510412279 | 0.177855714  | 1.24E-05 | 4.44E-05 |
| GENEBODY | LY96      | 8  | 74903801                                                                        | 1 | cg23732024                                                                              | 0.574359845 | 0.687735311 | 0.760874386 | 0.186514541  | 1.38E-09 | 1.75E-08 |



|          |          |    |                                                                                                     |    |                                                                                                               |             |             |             |              |          |             |
|----------|----------|----|-----------------------------------------------------------------------------------------------------|----|---------------------------------------------------------------------------------------------------------------|-------------|-------------|-------------|--------------|----------|-------------|
| GENEBODY | LYG2     | 2  | 99867344                                                                                            | 1  | cg12213414                                                                                                    | 0.73208942  | 0.525633244 | 0.400153191 | -0.331936229 | 2.73E-12 | 2.65E-10    |
| GENEBODY | LYNX1    | 8  | 143856487/143851375/143857045/143852576/143856122/143851287/143852085/143852587/143851427/143851371 | 10 | cg00801134/cg01652021/cg02228226/cg02415014/cg04350571/cg08530859/cg10210076/cg16120147/cg17770910/cg19877103 | 0.674260382 | 0.588288344 | 0.502342182 | -0.1719182   | 1.22E-12 | 1.62E-10    |
| GENEBODY | LYPD4    | 19 | 42342105                                                                                            | 1  | cg07959016                                                                                                    | 0.829059155 | 0.735874372 | 0.554447673 | -0.274611482 | 4.53E-08 | 3.16E-07    |
| GENEBODY | LYPLA2P1 | 6  | 33333563/33333945                                                                                   | 2  | cg06199753/cg25955341                                                                                         | 0.764087635 | 0.677827439 | 0.589828523 | -0.174259112 | 6.59E-13 | 1.15E-10    |
| GENEBODY | MCHR2    | 6  | 100380550                                                                                           | 1  | cg07108581                                                                                                    | 0.649549445 | 0.485307878 | 0.381360482 | -0.268188963 | 2.03E-11 | 8.69E-10    |
| GENEBODY | MCOLN3   | 1  | 85510988                                                                                            | 1  | cg24535650                                                                                                    | 0.822618095 | 0.781970011 | 0.604710259 | -0.217907836 | 4.66E-06 | 1.85E-05    |
| GENEBODY | MEF2A    | 15 | 100249186                                                                                           | 1  | cg07382129                                                                                                    | 0.49037118  | 0.398517056 | 0.331268505 | -0.159102675 | 1.19E-09 | 1.56E-08    |
| GENEBODY | MEIS3P1  | 17 | 15690181/15690713/15692425                                                                          | 3  | cg02539586/cg02628260/cg03956426                                                                              | 0.795992275 | 0.739504044 | 0.625972723 | -0.170019552 | 1.86E-08 | 1.50E-07    |
| GENEBODY | MGST1    | 12 | 16512895/16513009/16512994                                                                          | 3  | cg00874480/cg04885072/cg15284911                                                                              | 0.662120378 | 0.594295    | 0.483937057 | -0.178183321 | 1.74E-06 | 7.76E-06    |
| GENEBODY | MIR124-1 | 8  | 9760957                                                                                             | 1  | cg00571033                                                                                                    | 0.33505103  | 0.403189689 | 0.497906564 | 0.162855534  | 2.17E-05 | 7.35E-05    |
| GENEBODY | MIR124-2 | 8  | 65291730                                                                                            | 1  | cg04559779                                                                                                    | 0.448102125 | 0.571445239 | 0.678373882 | 0.230271757  | 2.01E-09 | 2.40E-08    |
| GENEBODY | MIR124-3 | 20 | 61809911/61809932                                                                                   | 2  | cg06660530/cg18772588                                                                                         | 0.130490972 | 0.244630445 | 0.388906181 | 0.258415209  | 5.08E-05 | 0.000158248 |
| GENEBODY | MIR128-1 | 2  | 136422981                                                                                           | 1  | cg01243312                                                                                                    | 0.5233833   | 0.409603739 | 0.343384568 | -0.179998732 | 3.23E-09 | 3.52E-08    |
| GENEBODY | MIR129-2 | 11 | 43602965                                                                                            | 1  | cg03365311                                                                                                    | 0.2920819   | 0.386223178 | 0.586951064 | 0.294869164  | 4.39E-10 | 7.19E-09    |
| GENEBODY | MIR130A  | 11 | 57408751                                                                                            | 1  | cg10512089                                                                                                    | 0.536843185 | 0.444654989 | 0.328181227 | -0.208661958 | 2.01E-11 | 8.68E-10    |
| GENEBODY | MIR137   | 1  | 98511629                                                                                            | 1  | cg04293733                                                                                                    | 0.353616195 | 0.387999328 | 0.558625427 | 0.205009232  | 1.16E-05 | 4.19E-05    |
| GENEBODY | MIR141   | 12 | 7073264                                                                                             | 1  | cg02624246                                                                                                    | 0.527913925 | 0.427904056 | 0.3544678   | -0.173446125 | 2.62E-10 | 4.91E-09    |
| GENEBODY | MIR146B  | 10 | 104196339                                                                                           | 1  | cg13442016                                                                                                    | 0.727210405 | 0.607243967 | 0.501807336 | -0.225403069 | 1.24E-09 | 1.61E-08    |
| GENEBODY | MIR187   | 18 | 33484837                                                                                            | 1  | cg05827233                                                                                                    | 0.765774795 | 0.670894844 | 0.600741077 | -0.165033718 | 1.81E-08 | 1.47E-07    |
| GENEBODY | MIR192   | 11 | 64658622                                                                                            | 1  | cg02258444                                                                                                    | 0.538769055 | 0.423091144 | 0.338631518 | -0.200137537 | 4.47E-11 | 1.41E-09    |
| GENEBODY | MIR194-2 | 11 | 64658903                                                                                            | 1  | cg24803202                                                                                                    | 0.53691924  | 0.42221775  | 0.333940036 | -0.202979204 | 4.98E-12 | 3.73E-10    |
| GENEBODY | MIR200C  | 12 | 7072891                                                                                             | 1  | cg18959988                                                                                                    | 0.55218625  | 0.471094    | 0.384008641 | -0.168177609 | 3.14E-11 | 1.15E-09    |
| GENEBODY | MIR206   | 6  | 52009154                                                                                            | 1  | cg25284213                                                                                                    | 0.551188985 | 0.4380045   | 0.345680914 | -0.205508071 | 8.20E-10 | 1.16E-08    |
| GENEBODY | MIR216B  | 2  | 56227870                                                                                            | 1  | cg011160855                                                                                                   | 0.657757845 | 0.546920028 | 0.49197955  | -0.165778295 | 6.07E-07 | 3.08E-06    |
| GENEBODY | MIR2276  | 13 | 24736569                                                                                            | 1  | cg22412649                                                                                                    | 0.495311715 | 0.40770505  | 0.327803223 | -0.167508492 | 3.49E-12 | 3.01E-10    |
| GENEBODY | MIR299   | 14 | 101490186/101490145                                                                                 | 2  | cg00175487/cg10082525                                                                                         | 0.59552164  | 0.481105761 | 0.390757355 | -0.204764285 | 2.80E-12 | 2.65E-10    |
| GENEBODY | MIR29A   | 7  | 130561511                                                                                           | 1  | cg11370011                                                                                                    | 0.644881505 | 0.553026489 | 0.487165309 | -0.157716196 | 2.80E-11 | 1.07E-09    |

|          |          |    |                                                                                                             |    |                                                                                                                                     |             |             |             |              |             |             |
|----------|----------|----|-------------------------------------------------------------------------------------------------------------|----|-------------------------------------------------------------------------------------------------------------------------------------|-------------|-------------|-------------|--------------|-------------|-------------|
| GENEBODY | MIR30A   | 6  | 72113322                                                                                                    | 1  | cg19098437                                                                                                                          | 0.62109517  | 0.601727172 | 0.454195595 | -0.166899575 | 6.09E-06    | 2.36E-05    |
| GENEBODY | MIR338   | 17 | 79099711                                                                                                    | 1  | cg26766064                                                                                                                          | 0.511717495 | 0.349082661 | 0.3546869   | -0.157030595 | 9.15E-05    | 0.000268958 |
| GENEBODY | MIR34B   | 11 | 111383668                                                                                                   | 1  | cg01192900                                                                                                                          | 0.19902581  | 0.250600589 | 0.418149077 | 0.219123267  | 1.96E-05    | 6.70E-05    |
| GENEBODY | MIR365-1 | 16 | 14403144                                                                                                    | 1  | cg02886263                                                                                                                          | 0.46594534  | 0.568260911 | 0.653808695 | 0.187863355  | 4.99E-09    | 5.01E-08    |
| GENEBODY | MIR376C  | 14 | 101506087                                                                                                   | 1  | cg13995230                                                                                                                          | 0.464168205 | 0.28744265  | 0.192639905 | -0.2715283   | 6.68E-12    | 4.35E-10    |
| GENEBODY | MIR382   | 14 | 101520662                                                                                                   | 1  | cg26238975                                                                                                                          | 0.87810463  | 0.795733122 | 0.714647409 | -0.163457221 | 0.000883996 | 0.002105938 |
| GENEBODY | MIR425   | 3  | 49057661                                                                                                    | 1  | cg07109801                                                                                                                          | 0.407468335 | 0.330439617 | 0.256427364 | -0.151040971 | 6.07E-10    | 9.24E-09    |
| GENEBODY | MIR449A  | 5  | 54466394                                                                                                    | 1  | cg13650580                                                                                                                          | 0.833229595 | 0.769999867 | 0.681101841 | -0.152127754 | 3.10E-05    | 0.000101231 |
| GENEBODY | MIR495   | 14 | 101500125                                                                                                   | 1  | cg14910227                                                                                                                          | 0.69446684  | 0.536242444 | 0.459293677 | -0.235173163 | 1.75E-08    | 1.43E-07    |
| GENEBODY | MIR519D  | 19 | 54216680                                                                                                    | 1  | cg04573316                                                                                                                          | 0.5399079   | 0.5916258   | 0.694703123 | 0.154795223  | 5.74E-05    | 0.000176731 |
| GENEBODY | MIR548A3 | 3  | 103926553/103930387                                                                                         | 2  | cg17865718/cg21938179                                                                                                               | 0.73800807  | 0.621865211 | 0.509194032 | -0.228814038 | 7.97E-06    | 3.00E-05    |
| GENEBODY | MIR623   | 13 | 100008450                                                                                                   | 1  | cg16193278                                                                                                                          | 0.48301897  | 0.5792346   | 0.635709114 | 0.152690144  | 1.04E-06    | 4.96E-06    |
| GENEBODY | MIR802   | 21 | 37093012                                                                                                    | 1  | cg00871610                                                                                                                          | 0.534480715 | 0.4201374   | 0.378997414 | -0.155483301 | 1.51E-05    | 5.29E-05    |
| GENEBODY | MIR885   | 3  | 10436197                                                                                                    | 1  | cg08044634                                                                                                                          | 0.857566015 | 0.760420911 | 0.678120305 | -0.17944571  | 2.86E-05    | 9.43E-05    |
| GENEBODY | MIR9-3   | 15 | 89911298/89911317                                                                                           | 2  | cg03082580/cg13888600                                                                                                               | 0.172127494 | 0.222306133 | 0.345540528 | 0.173413034  | 7.44E-06    | 2.82E-05    |
| GENEBODY | MLN      | 6  | 33767951/33764239                                                                                           | 2  | cg01584000/cg10378792                                                                                                               | 0.743819225 | 0.683719567 | 0.576965218 | -0.166854007 | 3.02E-07    | 1.67E-06    |
| GENEBODY | MMP10    | 11 | 102651208                                                                                                   | 1  | cg02061229                                                                                                                          | 0.44091554  | 0.351989117 | 0.255131745 | -0.185783795 | 1.84E-08    | 1.48E-07    |
| GENEBODY | MMP7     | 11 | 102396717                                                                                                   | 1  | cg25812146                                                                                                                          | 0.590088195 | 0.490143678 | 0.414655773 | -0.175432422 | 4.96E-06    | 1.96E-05    |
| GENEBODY | MNDA     | 1  | 158817808                                                                                                   | 1  | cg14216734                                                                                                                          | 0.75194808  | 0.661976394 | 0.531712809 | -0.220235271 | 5.22E-07    | 2.70E-06    |
| GENEBODY | MOGAT2   | 11 | 75429059                                                                                                    | 1  | cg12531542                                                                                                                          | 0.60581302  | 0.484689983 | 0.391481118 | -0.214331902 | 1.13E-10    | 2.67E-09    |
| GENEBODY | MPDZ     | 9  | 13249504/13136318                                                                                           | 2  | cg03905144/cg14539466                                                                                                               | 0.60568189  | 0.467571292 | 0.349236009 | -0.256445881 | 6.53E-15    | 1.35E-11    |
| GENEBODY | MPPED2   | 11 | 30502936/30474351/30567189/30597981/30444984/30601783/30510489/30531731/30431965/30488071/30428652/30582012 | 12 | cg01438090/cg02403522/cg05568454/cg05600421/cg05798059/cg06790862/cg17320698/cg19949932/cg20495540/cg20871721/cg23064082/cg25541653 | 0.588468317 | 0.517699758 | 0.42986966  | -0.158598657 | 2.51E-09    | 2.89E-08    |
| GENEBODY | MRAP2    | 6  | 84798113/84771783                                                                                           | 2  | cg08327884/cg23508908                                                                                                               | 0.623052445 | 0.513072711 | 0.461213064 | -0.161839381 | 1.06E-06    | 5.07E-06    |
| GENEBODY | MS4A7    | 11 | 60157161                                                                                                    | 1  | cg08716584                                                                                                                          | 0.49240782  | 0.630249239 | 0.651807773 | 0.159399953  | 2.37E-05    | 7.94E-05    |
| GENEBODY | MSC      | 8  | 72755871/72755052/72755784/72755568/72754953/72755162                                                       | 6  | cg06269753/cg13620034/cg20079899/cg26280666/cg26799209/cg26876974                                                                   | 0.198986605 | 0.310751587 | 0.468738948 | 0.269752343  | 2.48E-08    | 1.90E-07    |

|          |        |    |                                                                                                                                                                                         |    |                                                                                                                                                                                                                                                              |             |             |             |              |          |          |
|----------|--------|----|-----------------------------------------------------------------------------------------------------------------------------------------------------------------------------------------|----|--------------------------------------------------------------------------------------------------------------------------------------------------------------------------------------------------------------------------------------------------------------|-------------|-------------|-------------|--------------|----------|----------|
| GENEBODY | MST1R  | 3  | 49938721/4993800<br>4/49939703                                                                                                                                                          | 3  | cg01917209/cg15211<br>623/cg18292904                                                                                                                                                                                                                         | 0.720263333 | 0.550355703 | 0.421140836 | -0.299122496 | 5.34E-10 | 8.40E-09 |
| GENEBODY | MSX1   | 4  | 4864833/4862770/4<br>862184/4864625/48<br>63356/4863874/486<br>4532/4862240/4862<br>910/4864293/48641<br>10/4863282/486471<br>1/4864488/4863016<br>/4863678/4864430/<br>4864302/4864320 | 19 | cg01785568/cg03199<br>651/cg03717979/cg0<br>3843978/cg06375949<br>/cg09573795/cg0974<br>8975/cg14039306/cg<br>14167596/cg1584803<br>1/cg19596468/cg201<br>61179/cg20891301/c<br>g21538208/cg222560<br>27/cg22609784/cg24<br>840099/cg25144207/<br>cg27038439 | 0.386871456 | 0.458415534 | 0.552110839 | 0.165239383  | 1.24E-09 | 1.60E-08 |
| GENEBODY | MSX2P1 | 17 | 56234826/5623447<br>6/56234897                                                                                                                                                          | 3  | cg09123473/cg21502<br>786/cg21934311                                                                                                                                                                                                                         | 0.238256188 | 0.323847989 | 0.466468558 | 0.22821237   | 3.98E-09 | 4.16E-08 |
| GENEBODY | MURC   | 9  | 103342099                                                                                                                                                                               | 1  | cg14429381                                                                                                                                                                                                                                                   | 0.767664675 | 0.633701094 | 0.53592375  | -0.231740925 | 8.24E-09 | 7.53E-08 |
| GENEBODY | MVK    | 12 | 110025893/110026<br>822/110026737/110<br>026787/110013740/<br>110026028                                                                                                                 | 6  | cg15342134/cg16260<br>888/cg20424400/cg2<br>3364246/cg27263151<br>/cg27604975                                                                                                                                                                                | 0.750296586 | 0.638155857 | 0.5424841   | -0.207812486 | 1.72E-10 | 3.63E-09 |
| GENEBODY | MYBL1  | 8  | 67521144                                                                                                                                                                                | 1  | cg11785625                                                                                                                                                                                                                                                   | 0.56504327  | 0.492096567 | 0.391296595 | -0.173746675 | 7.45E-08 | 4.87E-07 |
| GENEBODY | MYBPHL | 1  | 109842096                                                                                                                                                                               | 1  | cg17797848                                                                                                                                                                                                                                                   | 0.731521935 | 0.590280228 | 0.492371995 | -0.23914994  | 7.03E-12 | 4.45E-10 |
| GENEBODY | MYCT1  | 6  | 153023279                                                                                                                                                                               | 1  | cg15961007                                                                                                                                                                                                                                                   | 0.35434064  | 0.253370928 | 0.170843986 | -0.183496654 | 3.15E-13 | 7.92E-11 |
| GENEBODY | MYF5   | 12 | 81111558                                                                                                                                                                                | 1  | cg10868277                                                                                                                                                                                                                                                   | 0.66851339  | 0.5278959   | 0.411802368 | -0.256711022 | 5.25E-11 | 1.57E-09 |
| GENEBODY | MYF6   | 12 | 81102123/8110248<br>6/81102562/811020<br>35                                                                                                                                             | 4  | cg00756032/cg05860<br>723/cg05981335/cg2<br>2344727                                                                                                                                                                                                          | 0.366367685 | 0.474323297 | 0.569307997 | 0.202940312  | 1.43E-09 | 1.80E-08 |
| GENEBODY | MYH1   | 17 | 10419499                                                                                                                                                                                | 1  | cg00134787                                                                                                                                                                                                                                                   | 0.77961829  | 0.688382022 | 0.587537686 | -0.192080604 | 1.52E-05 | 5.32E-05 |
| GENEBODY | MYH16  | 7  | 98885577/9887216<br>9/98885594/988717<br>69/98889946                                                                                                                                    | 5  | cg10213114/cg12492<br>380/cg13373361/cg1<br>4606858/cg19428602                                                                                                                                                                                               | 0.46999639  | 0.357906294 | 0.280486516 | -0.189509874 | 9.29E-12 | 5.17E-10 |
| GENEBODY | MYL1   | 2  | 211179560/211168<br>547/211169638                                                                                                                                                       | 3  | cg11059341/cg13027<br>933/cg27305342                                                                                                                                                                                                                         | 0.796977923 | 0.707156278 | 0.599318057 | -0.197659866 | 4.45E-06 | 1.78E-05 |
| GENEBODY | MYL7   | 7  | 44180604                                                                                                                                                                                | 1  | cg23370883                                                                                                                                                                                                                                                   | 0.45903084  | 0.3427988   | 0.243010723 | -0.216020117 | 2.27E-12 | 2.50E-10 |
| GENEBODY | MYOD1  | 11 | 17742741/1774250<br>2/17742759/177421<br>35                                                                                                                                             | 4  | cg02728629/cg20289<br>688/cg22040469/cg2<br>2926931                                                                                                                                                                                                          | 0.321351611 | 0.37751459  | 0.503118425 | 0.181766814  | 5.46E-06 | 2.13E-05 |

|          |            |    |                                                                                                                                                 |    |                                                                                                                                                                                 |             |             |             |              |          |             |
|----------|------------|----|-------------------------------------------------------------------------------------------------------------------------------------------------|----|---------------------------------------------------------------------------------------------------------------------------------------------------------------------------------|-------------|-------------|-------------|--------------|----------|-------------|
| GENEBODY | MYOG       | 1  | 203053787                                                                                                                                       | 1  | cg25145680                                                                                                                                                                      | 0.806581825 | 0.734224256 | 0.643965336 | -0.162616489 | 2.32E-06 | 9.97E-06    |
| GENEBODY | NCAM2      | 21 | 22373039/22372231                                                                                                                               | 2  | cg14355482/cg18345924                                                                                                                                                           | 0.538012175 | 0.412442728 | 0.321368955 | -0.21664322  | 4.43E-11 | 1.40E-09    |
| GENEBODY | NCKAP1L    | 12 | 54935674/54920931                                                                                                                               | 2  | cg09039845/cg21072795                                                                                                                                                           | 0.495273475 | 0.383999019 | 0.302932772 | -0.192340703 | 1.33E-11 | 6.59E-10    |
| GENEBODY | NCRNA00032 | 9  | 27282580/27248473/27282776                                                                                                                      | 3  | cg02388718/cg13913108/cg24670241                                                                                                                                                | 0.720612592 | 0.576927907 | 0.487126485 | -0.233486107 | 3.14E-14 | 3.21E-11    |
| GENEBODY | NCRNA00099 | 4  | 21849543                                                                                                                                        | 1  | cg24817257                                                                                                                                                                      | 0.693328685 | 0.628690144 | 0.490776255 | -0.20255243  | 5.40E-07 | 2.77E-06    |
| GENEBODY | NCRNA00157 | 21 | 19231611                                                                                                                                        | 1  | cg20316715                                                                                                                                                                      | 0.63082684  | 0.481931183 | 0.340326555 | -0.290500285 | 6.41E-13 | 1.14E-10    |
| GENEBODY | NCRNA00158 | 21 | 26803075                                                                                                                                        | 1  | cg25864727                                                                                                                                                                      | 0.883825255 | 0.817263661 | 0.710849077 | -0.172976178 | 5.56E-05 | 0.000171714 |
| GENEBODY | NCRNA00207 | 22 | 44965381                                                                                                                                        | 1  | cg06215908                                                                                                                                                                      | 0.497915075 | 0.4083154   | 0.294756077 | -0.203158998 | 9.96E-09 | 8.86E-08    |
| GENEBODY | NDST3      | 4  | 119093021/118975504/119095240                                                                                                                   | 3  | cg06837981/cg1231175/cg26126295                                                                                                                                                 | 0.579595065 | 0.426202117 | 0.344429245 | -0.23516582  | 1.04E-08 | 9.16E-08    |
| GENEBODY | NEFH       | 22 | 29877285                                                                                                                                        | 1  | cg20256245                                                                                                                                                                      | 0.35193242  | 0.450648994 | 0.581901541 | 0.229969121  | 9.50E-08 | 6.02E-07    |
| GENEBODY | NEUROD1    | 2  | 182542864/182542901/182543233                                                                                                                   | 3  | cg01431993/cg11528849/cg16640855                                                                                                                                                | 0.379430115 | 0.458889536 | 0.660677221 | 0.281247107  | 5.18E-10 | 8.21E-09    |
| GENEBODY | NEUROG3    | 10 | 71332776/71332744                                                                                                                               | 2  | cg12938159/cg26333837                                                                                                                                                           | 0.199739422 | 0.271869736 | 0.472729803 | 0.272990381  | 1.19E-09 | 1.55E-08    |
| GENEBODY | NF1P1      | 15 | 21131137                                                                                                                                        | 1  | cg15400766                                                                                                                                                                      | 0.686234795 | 0.599878083 | 0.497365195 | -0.1888696   | 4.12E-10 | 6.89E-09    |
| GENEBODY | NHEDC1     | 4  | 103867628                                                                                                                                       | 1  | cg15623444                                                                                                                                                                      | 0.85882682  | 0.7135649   | 0.550782377 | -0.308044443 | 1.92E-08 | 1.54E-07    |
| GENEBODY | NINL       | 20 | 25450839/25479848/25448861                                                                                                                      | 3  | cg09614389/cg13486641/cg26101502                                                                                                                                                | 0.683284493 | 0.593167531 | 0.433255398 | -0.250029094 | 7.22E-07 | 3.60E-06    |
| GENEBODY | NKAIN4     | 20 | 61884645/61878356/61885448/61885236/61877875/61885285/61876246/61885270/61883856/61877942/61878032/61885249/61885291/61876295/61874249/61885262 | 16 | cg01883482/cg05133591/cg05326358/cg06763829/cg07711085/cg07785314/cg08878177/cg09196068/cg10436333/cg12091786/cg12649455/cg15571277/cg18412834/cg19610126/cg20738665/cg21258057 | 0.28987586  | 0.339207221 | 0.458193063 | 0.168317203  | 2.10E-06 | 9.12E-06    |
| GENEBODY | NKX2-2     | 20 | 21493101/21492823/21492914                                                                                                                      | 3  | cg01397679/cg21977377/cg22474464                                                                                                                                                | 0.30181082  | 0.394914831 | 0.568672383 | 0.266861563  | 1.72E-06 | 7.66E-06    |
| GENEBODY | NKX2-5     | 5  | 172661132/172660884/172660796/172661487/172659730/172660996/17266080                                                                            | 7  | cg02051616/cg11330740/cg15929797/cg18017926/cg19923650/cg22730140/cg25916711                                                                                                    | 0.38725583  | 0.456078736 | 0.57162879  | 0.18437296   | 3.96E-07 | 2.11E-06    |

|          |        |    |                                                                                                                                                                                |   |                                                                                                                                                                                           |             |             |             |              |             |             |
|----------|--------|----|--------------------------------------------------------------------------------------------------------------------------------------------------------------------------------|---|-------------------------------------------------------------------------------------------------------------------------------------------------------------------------------------------|-------------|-------------|-------------|--------------|-------------|-------------|
| GENEBODY | NKX2-6 | 8  | 23563146/2356318<br>2/23563572/235620<br>03/23560590/23560 9<br>319/23562918/2356<br>0348/23559988                                                                             |   | cg00425918/cg01336<br>781/cg03330710/cg0<br>4434896/cg05310249<br>/cg10345920/cg1445<br>1926/cg15446990/cg<br>25499067                                                                    | 0.285703071 | 0.348424144 | 0.481923168 | 0.196220098  | 3.13E-09    | 3.44E-08    |
| GENEBODY | NKX6-2 | 10 | 134598496/134598<br>908/134598927                                                                                                                                              | 3 | cg04436469/cg06082<br>548/cg12816961                                                                                                                                                      | 0.362629477 | 0.403539039 | 0.524397276 | 0.161767799  | 3.25E-08    | 2.39E-07    |
| GENEBODY | NLGN1  | 3  | 173574358/173768<br>723/173681262/173<br>740927/173438075/<br>173920226/173457<br>176/173632551/173 14<br>630182/173992754/<br>173917837/173639<br>566/173583617/173<br>467741 |   | cg00493429/cg01982<br>637/cg02328758/cg0<br>2521771/cg02910194<br>/cg06097077/cg0745<br>2098/cg14890220/cg<br>15558616/cg1748236<br>0/cg19510409/cg215<br>48131/cg21904441/c<br>g22960621 | 0.662820778 | 0.554055089 | 0.472206206 | -0.190614572 | 7.09E-12    | 4.47E-10    |
| GENEBODY | NLRP10 | 11 | 7982706                                                                                                                                                                        | 1 | cg06118609                                                                                                                                                                                | 0.637352005 | 0.553022311 | 0.443522486 | -0.193829519 | 7.74E-07    | 3.82E-06    |
| GENEBODY | NLRP7  | 19 | 55447414/5544943<br>9/55450872/554520 4<br>80                                                                                                                                  |   | cg01560554/cg14928<br>510/cg18778097/cg2<br>6484916                                                                                                                                       | 0.696041305 | 0.566957344 | 0.442922027 | -0.253119278 | 1.05E-08    | 9.19E-08    |
| GENEBODY | NPFFR2 | 4  | 72900088/7295032<br>9/72903914/729253<br>71/72903841/72898 8<br>212/73012174/7299<br>6777                                                                                      |   | cg08414965/cg12986<br>700/cg14010852/cg1<br>4992771/cg15264404<br>/cg15867728/cg1608<br>4416/cg24923953                                                                                   | 0.608458698 | 0.538041629 | 0.422329807 | -0.186128891 | 8.81E-11    | 2.21E-09    |
| GENEBODY | NPS    | 10 | 129349644                                                                                                                                                                      | 1 | cg24631102                                                                                                                                                                                | 0.76417872  | 0.684049994 | 0.614130623 | -0.150048097 | 0.001372952 | 0.003149298 |
| GENEBODY | NPTXR  | 22 | 39238576/3923640<br>8                                                                                                                                                          | 2 | cg01503706/cg15251<br>408                                                                                                                                                                 | 0.755539335 | 0.667006328 | 0.52920018  | -0.226339155 | 8.02E-07    | 3.94E-06    |
| GENEBODY | NR3C1  | 5  | 142729913/142779<br>552/142757011/142<br>780254/142740314/ 8<br>142692961/142757<br>312/142776274                                                                              |   | cg03857453/cg06613<br>263/cg16586394/cg1<br>7342132/cg18484679<br>/cg19457823/cg2553<br>5999/cg27107893                                                                                   | 0.652768263 | 0.55125101  | 0.442838094 | -0.209930169 | 3.63E-10    | 6.25E-09    |
| GENEBODY | NRG4   | 15 | 76297890/7628748<br>3                                                                                                                                                          | 2 | cg21755367/cg22112<br>083                                                                                                                                                                 | 0.666402755 | 0.568845317 | 0.470192141 | -0.196210614 | 1.07E-09    | 1.42E-08    |
| GENEBODY | OBP2A  | 9  | 138439003                                                                                                                                                                      | 1 | cg14582108                                                                                                                                                                                | 0.7758893   | 0.697674594 | 0.5895234   | -0.1863659   | 2.04E-06    | 8.88E-06    |
| GENEBODY | OC90   | 8  | 133056586/133062<br>974/133062851/133 4<br>062214                                                                                                                              |   | cg00867889/cg03344<br>782/cg07665115/cg2<br>0220737                                                                                                                                       | 0.710621694 | 0.58002026  | 0.441747478 | -0.268874215 | 2.08E-13    | 6.68E-11    |

|          |          |    |                                                                                                                              |    |                                                                                                                                                           |             |             |             |              |             |             |
|----------|----------|----|------------------------------------------------------------------------------------------------------------------------------|----|-----------------------------------------------------------------------------------------------------------------------------------------------------------|-------------|-------------|-------------|--------------|-------------|-------------|
| GENEBODY | OLAH     | 10 | 15110983                                                                                                                     | 1  | cg04762351                                                                                                                                                | 0.550208665 | 0.408004789 | 0.284452264 | -0.265756401 | 3.22E-15    | 9.31E-12    |
| GENEBODY | OLFM4    | 13 | 53618826/53603286                                                                                                            | 2  | cg02570298/cg12582008                                                                                                                                     | 0.57908602  | 0.478155692 | 0.42762375  | -0.15146227  | 1.08E-09    | 1.44E-08    |
| GENEBODY | OLIG2    | 21 | 34399260/34400072/34399361                                                                                                   | 3  | cg05238769/cg11950383/cg14293300                                                                                                                          | 0.330209048 | 0.402073697 | 0.524951309 | 0.194742262  | 8.42E-09    | 7.66E-08    |
| GENEBODY | OLR1     | 12 | 10322420                                                                                                                     | 1  | cg12203957                                                                                                                                                | 0.74355201  | 0.701605889 | 0.557129691 | -0.186422319 | 4.02E-05    | 0.000128319 |
| GENEBODY | OPTC     | 1  | 203465361                                                                                                                    | 1  | cg04830316                                                                                                                                                | 0.420095985 | 0.328130639 | 0.229627336 | -0.190468649 | 2.78E-11    | 1.07E-09    |
| GENEBODY | OR1F2P   | 16 | 3266276                                                                                                                      | 1  | cg08748105                                                                                                                                                | 0.64413183  | 0.556193817 | 0.4051304   | -0.23900143  | 1.49E-07    | 8.91E-07    |
| GENEBODY | OR2H1    | 6  | 29430096/29430435/29429909/29430158/29430334                                                                                 | 5  | cg00114160/cg01311802/cg15641340/cg16343924/cg21468949                                                                                                    | 0.559305293 | 0.478241569 | 0.40384861  | -0.155456682 | 7.84E-11    | 2.02E-09    |
| GENEBODY | OR2L13   | 1  | 248262824                                                                                                                    | 1  | cg16717532                                                                                                                                                | 0.534526385 | 0.435464461 | 0.331320441 | -0.203205944 | 8.62E-13    | 1.35E-10    |
| GENEBODY | OR7E91P  | 2  | 71251453/71251634                                                                                                            | 2  | cg00208218/cg12073208                                                                                                                                     | 0.685742783 | 0.569623172 | 0.520958036 | -0.164784746 | 1.13E-06    | 5.34E-06    |
| GENEBODY | ORMDL2   | 12 | 56213916                                                                                                                     | 1  | cg27554856                                                                                                                                                | 0.880130045 | 0.724828161 | 0.691191491 | -0.188938554 | 4.08E-07    | 2.16E-06    |
| GENEBODY | OSR2     | 8  | 99961376/99963021/99961874/99961768/99961545/99963657/99962118/99962347/99962013                                             | 9  | cg00388812/cg01148781/cg01581084/cg05754861/cg08202494/cg09607488/cg16746576/cg18744668/cg20823772                                                        | 0.402276217 | 0.474009469 | 0.585376011 | 0.183099794  | 1.86E-05    | 6.39E-05    |
| GENEBODY | OSTN     | 3  | 190931199/190956840                                                                                                          | 2  | cg03192737/cg26764579                                                                                                                                     | 0.790382615 | 0.732383383 | 0.629806091 | -0.160576524 | 8.03E-05    | 0.000239187 |
| GENEBODY | OTX1     | 2  | 63281844/63282043/63280376/63281383/63282702/6328211/63283013/63282883/63280625/63281317/63283355/63280164/63281139/63281069 | 14 | cg00445405/cg00463767/cg02606423/cg03655683/cg04654530/cg04808506/cg07974511/cg08473330/cg10640333/cg10859133/cg14604681/cg22732253/cg25622366/cg27364741 | 0.309800656 | 0.336931864 | 0.461400737 | 0.15160008   | 0.000252557 | 0.000676305 |
| GENEBODY | PAFAH1B1 | 17 | 2551652                                                                                                                      | 1  | cg04957146                                                                                                                                                | 0.78390076  | 0.679253189 | 0.613538786 | -0.170361974 | 7.14E-08    | 4.69E-07    |
| GENEBODY | PAMR1    | 11 | 35475769/35499741/35546824/35520863/35542580                                                                                 | 5  | cg01664929/cg10832281/cg15406469/cg16273509/cg22785492                                                                                                    | 0.682185765 | 0.634645744 | 0.527421585 | -0.15476418  | 4.32E-07    | 2.28E-06    |
| GENEBODY | PATE3    | 11 | 125660444                                                                                                                    | 1  | cg24746315                                                                                                                                                | 0.747075705 | 0.580691672 | 0.517078341 | -0.229997364 | 8.09E-06    | 3.04E-05    |
| GENEBODY | PATE4    | 11 | 125707106                                                                                                                    | 1  | cg22329515                                                                                                                                                | 0.49080638  | 0.352153789 | 0.270334636 | -0.220471744 | 1.62E-14    | 2.01E-11    |

|          |      |    |    |                    |             |             |             |             |          |          |  |
|----------|------|----|----|--------------------|-------------|-------------|-------------|-------------|----------|----------|--|
|          |      |    |    | cg01587682/cg02770 |             |             |             |             |          |          |  |
|          |      |    |    | 983/cg02771142/cg0 |             |             |             |             |          |          |  |
|          |      |    |    | 3854796/cg03905867 |             |             |             |             |          |          |  |
|          |      |    |    | /cg04521333/cg0459 |             |             |             |             |          |          |  |
|          |      |    |    | 8774/cg04938549/cg |             |             |             |             |          |          |  |
|          |      |    |    | 06666008/cg0670593 |             |             |             |             |          |          |  |
|          |      |    |    | 0/cg07124117/cg074 |             |             |             |             |          |          |  |
|          |      |    |    | 78918/cg08116462/c |             |             |             |             |          |          |  |
|          |      |    |    | g08199056/cg084990 |             |             |             |             |          |          |  |
|          |      |    |    | 46/cg08784129/cg09 |             |             |             |             |          |          |  |
|          |      |    |    | 224689/cg09382096/ |             |             |             |             |          |          |  |
|          |      |    |    | cg09537620/cg11128 |             |             |             |             |          |          |  |
|          |      |    |    | 216/cg11469061/cg1 |             |             |             |             |          |          |  |
|          |      |    |    | 1827910/cg12798259 |             |             |             |             |          |          |  |
|          |      |    |    | /cg13023210/cg1324 |             |             |             |             |          |          |  |
| GENEBODY | PAX6 | 11 | 51 | 5152/cg13596833/cg | 0.315493726 | 0.366353366 | 0.498567282 | 0.183073555 | 1.92E-07 | 1.12E-06 |  |
|          |      |    |    | 13891702/cg1480035 |             |             |             |             |          |          |  |
|          |      |    |    | 1/cg15301794/cg161 |             |             |             |             |          |          |  |
|          |      |    |    | 80353/cg16615954/c |             |             |             |             |          |          |  |
|          |      |    |    | g16616521/cg168654 |             |             |             |             |          |          |  |
|          |      |    |    | 46/cg16970357/cg18 |             |             |             |             |          |          |  |
|          |      |    |    | 082638/cg18372607/ |             |             |             |             |          |          |  |
|          |      |    |    | cg18988498/cg20014 |             |             |             |             |          |          |  |
|          |      |    |    | 398/cg21016855/cg2 |             |             |             |             |          |          |  |
|          |      |    |    | 1582373/cg22392038 |             |             |             |             |          |          |  |
|          |      |    |    | /cg22557091/cg2274 |             |             |             |             |          |          |  |
|          |      |    |    | 0492/cg22982368/cg |             |             |             |             |          |          |  |
|          |      |    |    | 23125492/cg2328771 |             |             |             |             |          |          |  |
|          |      |    |    | 0/cg24332783/cg257 |             |             |             |             |          |          |  |
|          |      |    |    | 64105/cg26019112/c |             |             |             |             |          |          |  |
|          |      |    |    | g26029734/cg270110 |             |             |             |             |          |          |  |
|          |      |    |    | 60                 |             |             |             |             |          |          |  |

|          |        |    |                                                                                                                                                                                                                                          |    |                                                                                                                                                                                                                                                                                        |             |             |             |              |          |          |
|----------|--------|----|------------------------------------------------------------------------------------------------------------------------------------------------------------------------------------------------------------------------------------------|----|----------------------------------------------------------------------------------------------------------------------------------------------------------------------------------------------------------------------------------------------------------------------------------------|-------------|-------------|-------------|--------------|----------|----------|
| GENEBODY | PAX9   | 14 | 37131329/3713249<br>0/37133285/371354<br>35/37133116/37132<br>291/37135898/3713<br>2774/37135384/371<br>32665/37133714/37<br>133168/37131998/3<br>7136192/37136391/<br>37131601/3713567<br>1/37131555/371362<br>83/37132764/37135<br>586 | 21 | cg01002381/cg01794<br>426/cg01803925/cg0<br>4994761/cg05842348<br>/cg06749715/cg0675<br>6919/cg07397956/cg<br>09814975/cg1074102<br>5/cg10913846/cg110<br>91113/cg13678371/c<br>g17696160/cg183610<br>98/cg19032066/cg20<br>710709/cg22968936/<br>cg23683588/cg24066<br>316/cg26094789 | 0.352632712 | 0.418403506 | 0.527369436 | 0.174736724  | 7.91E-09 | 7.29E-08 |
| GENEBODY | PCDH17 | 13 | 58240705/5829901<br>5/58227960/582467<br>05/58256880/58299<br>073                                                                                                                                                                        | 6  | cg02994463/cg07629<br>125/cg19637591/cg2<br>0594465/cg22103831<br>/cg24586528                                                                                                                                                                                                          | 0.615687336 | 0.530037866 | 0.414609537 | -0.201077799 | 2.84E-12 | 2.65E-10 |
| GENEBODY | PCDH8  | 13 | 53420135/5341996<br>3/53419617/534195<br>96/53419729                                                                                                                                                                                     | 5  | cg06460717/cg07847<br>863/cg14950829/cg1<br>8002116/cg25600049                                                                                                                                                                                                                         | 0.297761536 | 0.355381107 | 0.457716873 | 0.159955337  | 6.31E-06 | 2.43E-05 |



|          |          |     |                   |                    |             |             |             |             |          |          |  |
|----------|----------|-----|-------------------|--------------------|-------------|-------------|-------------|-------------|----------|----------|--|
|          |          |     | 140855562/14085/  | cg00281842/cg00589 |             |             |             |             |          |          |  |
|          |          |     | 995/140807787/140 | 850/cg00808170/cg0 |             |             |             |             |          |          |  |
|          |          |     | 806126/140867386/ | 0888801/cg00943245 |             |             |             |             |          |          |  |
|          |          |     | 140821244/140811  | /cg01000954/cg0122 |             |             |             |             |          |          |  |
|          |          |     | 520/140802831/140 | 4715/cg01729977/cg |             |             |             |             |          |          |  |
|          |          |     | 864578/140888468/ | 02022733/cg0205665 |             |             |             |             |          |          |  |
|          |          |     | 140821687/140873  | 3/cg02161292/cg022 |             |             |             |             |          |          |  |
|          |          |     | 765/140810404/140 | 49657/cg02267483/c |             |             |             |             |          |          |  |
|          |          |     | 798095/140855547/ | g02331883/cg024303 |             |             |             |             |          |          |  |
|          |          |     | 140810109/140798  | 47/cg02452944/cg02 |             |             |             |             |          |          |  |
|          |          |     | 758/140803130/140 | 707176/cg02715006/ |             |             |             |             |          |          |  |
|          |          |     | 855463/140799811/ | cg02780295/cg03456 |             |             |             |             |          |          |  |
|          |          |     | 140796240/140864  | 338/cg03486475/cg0 |             |             |             |             |          |          |  |
|          |          |     | 593/140800495/140 | 3640756/cg03892308 |             |             |             |             |          |          |  |
|          |          |     | 868130/140811253/ | /cg03898832/cg0408 |             |             |             |             |          |          |  |
|          |          |     | 140819300/140856  | 0041/cg04117404/cg |             |             |             |             |          |          |  |
|          |          |     | 330/140798188/140 | 04453180/cg0450360 |             |             |             |             |          |          |  |
|          |          |     | 802804/140871156/ | 0/cg04845915/cg049 |             |             |             |             |          |          |  |
|          |          |     | 140870164/140824  | 64031/cg05149776/c |             |             |             |             |          |          |  |
| GENEBODY | PCDHGA10 | 5   | 037/140805732/140 | g05197036/cg056704 | 0.530000746 | 0.607268385 | 0.689949933 | 0.159949187 | 2.50E-10 | 4.74E-09 |  |
|          |          | 125 | 800586/140864276/ | 72/cg05870739/cg06 |             |             |             |             |          |          |  |
|          |          |     | 140800929/140802  | 428620/cg06572465/ |             |             |             |             |          |          |  |
|          |          |     | 135/140856469/140 | cg07179872/cg07445 |             |             |             |             |          |          |  |
|          |          |     | 855857/140811642/ | 963/cg07448606/cg0 |             |             |             |             |          |          |  |
|          |          |     | 140796892/140811  | 7489502/cg07524997 |             |             |             |             |          |          |  |
|          |          |     | 312/140822776/140 | /cg07539798/cg0760 |             |             |             |             |          |          |  |
|          |          |     | 810137/140810260/ | 8474/cg07730329/cg |             |             |             |             |          |          |  |
|          |          |     | 140857813/140807  | 07802710/cg0815532 |             |             |             |             |          |          |  |
|          |          |     | 666/140800983/140 | 5/cg08200869/cg083 |             |             |             |             |          |          |  |
|          |          |     | 798161/140797509/ | 95122/cg08935238/c |             |             |             |             |          |          |  |
|          |          |     | 140818522/140857  | g08938584/cg094847 |             |             |             |             |          |          |  |
|          |          |     | 474/140810920/140 | 52/cg09581226/cg09 |             |             |             |             |          |          |  |
|          |          |     | 797280/140800629/ | 639151/cg10435816/ |             |             |             |             |          |          |  |
|          |          |     | 140812464/140855  | cg10679597/cg10805 |             |             |             |             |          |          |  |
|          |          |     | 582/140810161/140 | 220/cg10858746/cg1 |             |             |             |             |          |          |  |
|          |          |     | 865433/140864834/ | 1647681/cg11830096 |             |             |             |             |          |          |  |
|          |          |     | 140810123/140872  | /cg12145907/cg1230 |             |             |             |             |          |          |  |
|          |          |     | 334/140864474/140 | 4520/cg12487901/cg |             |             |             |             |          |          |  |
|          |          |     | 857192/140807490/ | 12648074/cg1287703 |             |             |             |             |          |          |  |



|          |         |   |                   |     |                     |             |             |             |             |          |          |  |
|----------|---------|---|-------------------|-----|---------------------|-------------|-------------|-------------|-------------|----------|----------|--|
|          |         |   | 140/82367/140779  |     | cg00048743/cg000118 |             |             |             |             |          |          |  |
|          |         |   | 112/140855562/140 |     | 365/cg00281842/cg0  |             |             |             |             |          |          |  |
|          |         |   | 857995/140807787/ |     | 0589850/cg00808170  |             |             |             |             |          |          |  |
|          |         |   | 140806126/140867  |     | /cg00888801/cg0094  |             |             |             |             |          |          |  |
|          |         |   | 386/140821244/140 |     | 3245/cg01000954/cg  |             |             |             |             |          |          |  |
|          |         |   | 792918/140811520/ |     | 01169021/cg0122471  |             |             |             |             |          |          |  |
|          |         |   | 140792558/140802  |     | 5/cg01311360/cg017  |             |             |             |             |          |          |  |
|          |         |   | 831/140864578/140 |     | 29977/cg02022733/c  |             |             |             |             |          |          |  |
|          |         |   | 888468/140779461/ |     | g02056653/cg020741  |             |             |             |             |          |          |  |
|          |         |   | 140821687/140873  |     | 91/cg02161292/cg02  |             |             |             |             |          |          |  |
|          |         |   | 765/140810404/140 |     | 249657/cg02267483/  |             |             |             |             |          |          |  |
|          |         |   | 798095/140855547/ |     | cg02331883/cg02430  |             |             |             |             |          |          |  |
|          |         |   | 140810109/140778  |     | 347/cg02452944/cg0  |             |             |             |             |          |          |  |
|          |         |   | 546/140798758/140 |     | 2563137/cg02707176  |             |             |             |             |          |          |  |
|          |         |   | 803130/140855463/ |     | /cg02715006/cg0278  |             |             |             |             |          |          |  |
|          |         |   | 140794962/140788  |     | 0295/cg03400785/cg  |             |             |             |             |          |          |  |
|          |         |   | 613/140799811/140 |     | 03415916/cg0345633  |             |             |             |             |          |          |  |
|          |         |   | 796240/14077607/  |     | 8/cg03486475/cg036  |             |             |             |             |          |          |  |
|          |         |   | 140864593/140800  |     | 08712/cg03640756/c  |             |             |             |             |          |          |  |
| GENEBODY | PCDHGA8 | 5 | 495/140787013/140 | 176 | g03892308/cg038985  | 0.520675076 | 0.598193152 | 0.671267785 | 0.150592708 | 1.71E-10 | 3.60E-09 |  |
|          |         |   | 868130/140811253/ |     | 77/cg03898832/cg04  |             |             |             |             |          |          |  |
|          |         |   | 140819300/140856  |     | 080041/cg04117404/  |             |             |             |             |          |          |  |
|          |         |   | 330/140798188/140 |     | cg04453180/cg04503  |             |             |             |             |          |          |  |
|          |         |   | 777501/140793307/ |     | 600/cg04553690/cg0  |             |             |             |             |          |          |  |
|          |         |   | 140802804/140871  |     | 4726784/cg04845915  |             |             |             |             |          |          |  |
|          |         |   | 156/140870164/140 |     | /cg04964031/cg0514  |             |             |             |             |          |          |  |
|          |         |   | 824037/140805732/ |     | 9776/cg05197036/cg  |             |             |             |             |          |          |  |
|          |         |   | 140800586/140775  |     | 05670472/cg0587073  |             |             |             |             |          |          |  |
|          |         |   | 631/140864276/140 |     | 9/cg06065872/cg064  |             |             |             |             |          |          |  |
|          |         |   | 800929/140789450/ |     | 28620/cg06572465/c  |             |             |             |             |          |          |  |
|          |         |   | 140783647/140789  |     | g06757405/cg067761  |             |             |             |             |          |          |  |
|          |         |   | 247/140802135/140 |     | 59/cg07017875/cg07  |             |             |             |             |          |          |  |
|          |         |   | 794359/140856469/ |     | 179872/cg07231479/  |             |             |             |             |          |          |  |
|          |         |   | 140855857/140811  |     | cg07445963/cg07448  |             |             |             |             |          |          |  |
|          |         |   | 642/140796892/140 |     | 606/cg07489502/cg0  |             |             |             |             |          |          |  |
|          |         |   | 811312/140822776/ |     | 7524997/cg07539798  |             |             |             |             |          |          |  |
|          |         |   | 140787430/140793  |     | /cg07608474/cg0761  |             |             |             |             |          |          |  |
|          |         |   | 470/140810137/140 |     | 3945/cg07620533/cg  |             |             |             |             |          |          |  |
|          |         |   | 810260/140782755/ |     | 07730329/cg0780271  |             |             |             |             |          |          |  |

|          |         |   |                   |     |                    |             |             |             |             |          |          |  |
|----------|---------|---|-------------------|-----|--------------------|-------------|-------------|-------------|-------------|----------|----------|--|
|          |         |   | 140855562/14085/  |     | cg00281842/cg00589 |             |             |             |             |          |          |  |
|          |         |   | 995/140807787/140 |     | 850/cg00808170/cg0 |             |             |             |             |          |          |  |
|          |         |   | 806126/140867386/ |     | 0888801/cg00943245 |             |             |             |             |          |          |  |
|          |         |   | 140821244/140792  |     | /cg01000954/cg0116 |             |             |             |             |          |          |  |
|          |         |   | 918/140811520/140 |     | 9021/cg01224715/cg |             |             |             |             |          |          |  |
|          |         |   | 792558/140802831/ |     | 01311360/cg0172997 |             |             |             |             |          |          |  |
|          |         |   | 140864578/140888  |     | 7/cg02022733/cg020 |             |             |             |             |          |          |  |
|          |         |   | 468/140821687/140 |     | 56653/cg02161292/c |             |             |             |             |          |          |  |
|          |         |   | 873765/140810404/ |     | g02249657/cg022674 |             |             |             |             |          |          |  |
|          |         |   | 140798095/140855  |     | 83/cg02331883/cg02 |             |             |             |             |          |          |  |
|          |         |   | 547/140810109/140 |     | 430347/cg02452944/ |             |             |             |             |          |          |  |
|          |         |   | 798758/140803130/ |     | cg02707176/cg02715 |             |             |             |             |          |          |  |
|          |         |   | 140855463/140794  |     | 006/cg02780295/cg0 |             |             |             |             |          |          |  |
|          |         |   | 962/140788613/140 |     | 3400785/cg03415916 |             |             |             |             |          |          |  |
|          |         |   | 799811/140796240/ |     | /cg03456338/cg0348 |             |             |             |             |          |          |  |
|          |         |   | 140864593/140800  |     | 6475/cg03640756/cg |             |             |             |             |          |          |  |
|          |         |   | 495/140787013/140 |     | 03892308/cg0389857 |             |             |             |             |          |          |  |
|          |         |   | 868130/140811253/ |     | 7/cg03898832/cg040 |             |             |             |             |          |          |  |
|          |         |   | 140819300/140856  |     | 80041/cg04117404/c |             |             |             |             |          |          |  |
| GENEBODY | PCDHGA9 | 5 | 330/140798188/140 | 152 | g04453180/cg045036 | 0.513139906 | 0.592403142 | 0.667432175 | 0.154292269 | 1.45E-10 | 3.21E-09 |  |
|          |         |   | 793307/140802804/ |     | 00/cg04726784/cg04 |             |             |             |             |          |          |  |
|          |         |   | 140871156/140870  |     | 845915/cg04964031/ |             |             |             |             |          |          |  |
|          |         |   | 164/140824037/140 |     | cg05149776/cg05197 |             |             |             |             |          |          |  |
|          |         |   | 805732/140800586/ |     | 036/cg05670472/cg0 |             |             |             |             |          |          |  |
|          |         |   | 140864276/140800  |     | 5870739/cg06428620 |             |             |             |             |          |          |  |
|          |         |   | 929/140789450/140 |     | /cg06572465/cg0675 |             |             |             |             |          |          |  |
|          |         |   | 789247/140802135/ |     | 7405/cg07017875/cg |             |             |             |             |          |          |  |
|          |         |   | 140794359/140856  |     | 07179872/cg0723147 |             |             |             |             |          |          |  |
|          |         |   | 469/140855857/140 |     | 9/cg07445963/cg074 |             |             |             |             |          |          |  |
|          |         |   | 811642/140796892/ |     | 48606/cg07489502/c |             |             |             |             |          |          |  |
|          |         |   | 140811312/140822  |     | g07524997/cg075397 |             |             |             |             |          |          |  |
|          |         |   | 776/140787430/140 |     | 98/cg07608474/cg07 |             |             |             |             |          |          |  |
|          |         |   | 793470/140810137/ |     | 613945/cg07620533/ |             |             |             |             |          |          |  |
|          |         |   | 140810260/140857  |     | cg07730329/cg07802 |             |             |             |             |          |          |  |
|          |         |   | 813/140807666/140 |     | 710/cg08155325/cg0 |             |             |             |             |          |          |  |
|          |         |   | 800983/140789708/ |     | 8200869/cg08395122 |             |             |             |             |          |          |  |
|          |         |   | 140798161/140797  |     | /cg08854987/cg0893 |             |             |             |             |          |          |  |
|          |         |   | 509/140787623/140 |     | 5238/cg08938584/cg |             |             |             |             |          |          |  |
|          |         |   | 818522/140857474/ |     | 09465698/cg0948475 |             |             |             |             |          |          |  |

|          |         |   |                   |     |                     |            |             |             |             |          |          |  |
|----------|---------|---|-------------------|-----|---------------------|------------|-------------|-------------|-------------|----------|----------|--|
|          |         |   | 140/82367/140855  |     | cg00048743/cg000281 |            |             |             |             |          |          |  |
|          |         |   | 562/140857995/140 |     | 842/cg00589850/cg0  |            |             |             |             |          |          |  |
|          |         |   | 807787/140806126/ |     | 0808170/cg00888801  |            |             |             |             |          |          |  |
|          |         |   | 140867386/140821  |     | /cg00943245/cg0100  |            |             |             |             |          |          |  |
|          |         |   | 244/140792918/140 |     | 0954/cg01169021/cg  |            |             |             |             |          |          |  |
|          |         |   | 811520/140792558/ |     | 01224715/cg0131136  |            |             |             |             |          |          |  |
|          |         |   | 140802831/140864  |     | 0/cg01729977/cg020  |            |             |             |             |          |          |  |
|          |         |   | 578/140888468/140 |     | 22733/cg02056653/c  |            |             |             |             |          |          |  |
|          |         |   | 821687/140873765/ |     | g02161292/cg022496  |            |             |             |             |          |          |  |
|          |         |   | 140810404/140798  |     | 57/cg02267483/cg02  |            |             |             |             |          |          |  |
|          |         |   | 095/140855547/140 |     | 331883/cg02430347/  |            |             |             |             |          |          |  |
|          |         |   | 810109/140798758/ |     | cg02452944/cg02707  |            |             |             |             |          |          |  |
|          |         |   | 140803130/140855  |     | 176/cg02715006/cg0  |            |             |             |             |          |          |  |
|          |         |   | 463/140794962/140 |     | 2780295/cg03400785  |            |             |             |             |          |          |  |
|          |         |   | 788613/140799811/ |     | /cg03415916/cg0345  |            |             |             |             |          |          |  |
|          |         |   | 140796240/140864  |     | 6338/cg03486475/cg  |            |             |             |             |          |          |  |
|          |         |   | 593/140800495/140 |     | 03640756/cg0389230  |            |             |             |             |          |          |  |
|          |         |   | 787013/140868130/ |     | 8/cg03898577/cg038  |            |             |             |             |          |          |  |
|          |         |   | 140811253/140819  |     | 98832/cg04080041/c  |            |             |             |             |          |          |  |
| GENEBODY | PCDHGB5 | 5 | 300/140856330/140 | 161 | g04117404/cg044531  | 0.51864862 | 0.598171215 | 0.668942882 | 0.150294262 | 1.45E-10 | 3.21E-09 |  |
|          |         |   | 798188/140793307/ |     | 80/cg04503600/cg04  |            |             |             |             |          |          |  |
|          |         |   | 140802804/140871  |     | 726784/cg04845915/  |            |             |             |             |          |          |  |
|          |         |   | 156/140870164/140 |     | cg04964031/cg05149  |            |             |             |             |          |          |  |
|          |         |   | 824037/140805732/ |     | 776/cg05197036/cg0  |            |             |             |             |          |          |  |
|          |         |   | 140800586/140864  |     | 5670472/cg05870739  |            |             |             |             |          |          |  |
|          |         |   | 276/140800929/140 |     | /cg06428620/cg0657  |            |             |             |             |          |          |  |
|          |         |   | 789450/140783647/ |     | 2465/cg06757405/cg  |            |             |             |             |          |          |  |
|          |         |   | 140789247/140802  |     | 06776159/cg0701787  |            |             |             |             |          |          |  |
|          |         |   | 135/140794359/140 |     | 5/cg07179872/cg072  |            |             |             |             |          |          |  |
|          |         |   | 856469/140855857/ |     | 31479/cg07445963/c  |            |             |             |             |          |          |  |
|          |         |   | 140811642/140796  |     | g07448606/cg074895  |            |             |             |             |          |          |  |
|          |         |   | 892/140811312/140 |     | 02/cg07524997/cg07  |            |             |             |             |          |          |  |
|          |         |   | 822776/140787430/ |     | 539798/cg07608474/  |            |             |             |             |          |          |  |
|          |         |   | 140793470/140810  |     | cg07613945/cg07620  |            |             |             |             |          |          |  |
|          |         |   | 137/140810260/140 |     | 533/cg07730329/cg0  |            |             |             |             |          |          |  |
|          |         |   | 782755/140857813/ |     | 7802710/cg07816637  |            |             |             |             |          |          |  |
|          |         |   | 140807666/140782  |     | /cg08155325/cg0820  |            |             |             |             |          |          |  |
|          |         |   | 510/140800983/140 |     | 0869/cg08292467/cg  |            |             |             |             |          |          |  |
|          |         |   | 789708/140798161/ |     | 08395122/cg0885498  |            |             |             |             |          |          |  |

|          |         |   |                   |     |                    |             |             |             |             |          |          |  |
|----------|---------|---|-------------------|-----|--------------------|-------------|-------------|-------------|-------------|----------|----------|--|
|          |         |   | 140855562/14085/  |     | cg00281842/cg00589 |             |             |             |             |          |          |  |
|          |         |   | 995/140807787/140 |     | 850/cg00808170/cg0 |             |             |             |             |          |          |  |
|          |         |   | 806126/140867386/ |     | 0888801/cg00943245 |             |             |             |             |          |          |  |
|          |         |   | 140821244/140792  |     | /cg01000954/cg0116 |             |             |             |             |          |          |  |
|          |         |   | 918/140811520/140 |     | 9021/cg01224715/cg |             |             |             |             |          |          |  |
|          |         |   | 792558/140802831/ |     | 01311360/cg0172997 |             |             |             |             |          |          |  |
|          |         |   | 140864578/140888  |     | 7/cg02022733/cg020 |             |             |             |             |          |          |  |
|          |         |   | 468/140821687/140 |     | 56653/cg02161292/c |             |             |             |             |          |          |  |
|          |         |   | 873765/140810404/ |     | g02249657/cg022674 |             |             |             |             |          |          |  |
|          |         |   | 140798095/140855  |     | 83/cg02331883/cg02 |             |             |             |             |          |          |  |
|          |         |   | 547/140810109/140 |     | 430347/cg02452944/ |             |             |             |             |          |          |  |
|          |         |   | 798758/140803130/ |     | cg02707176/cg02715 |             |             |             |             |          |          |  |
|          |         |   | 140855463/140794  |     | 006/cg02780295/cg0 |             |             |             |             |          |          |  |
|          |         |   | 962/140799811/140 |     | 3400785/cg03456338 |             |             |             |             |          |          |  |
|          |         |   | 796240/140864593/ |     | /cg03486475/cg0364 |             |             |             |             |          |          |  |
|          |         |   | 140800495/140868  |     | 0756/cg03892308/cg |             |             |             |             |          |          |  |
|          |         |   | 130/140811253/140 |     | 03898832/cg0408004 |             |             |             |             |          |          |  |
|          |         |   | 819300/140856330/ |     | 1/cg04117404/cg044 |             |             |             |             |          |          |  |
|          |         |   | 140798188/140793  |     | 53180/cg04503600/c |             |             |             |             |          |          |  |
| GENEBODY | PCDHGB6 | 5 | 307/140802804/140 | 140 | g04726784/cg048459 | 0.513457667 | 0.591000494 | 0.669084696 | 0.155627029 | 1.72E-10 | 3.63E-09 |  |
|          |         |   | 871156/140870164/ |     | 15/cg04964031/cg05 |             |             |             |             |          |          |  |
|          |         |   | 140824037/140805  |     | 149776/cg05197036/ |             |             |             |             |          |          |  |
|          |         |   | 732/140800586/140 |     | cg05670472/cg05870 |             |             |             |             |          |          |  |
|          |         |   | 864276/140800929/ |     | 739/cg06428620/cg0 |             |             |             |             |          |          |  |
|          |         |   | 140802135/140794  |     | 6572465/cg07179872 |             |             |             |             |          |          |  |
|          |         |   | 359/140856469/140 |     | /cg07231479/cg0744 |             |             |             |             |          |          |  |
|          |         |   | 855857/140811642/ |     | 5963/cg07448606/cg |             |             |             |             |          |          |  |
|          |         |   | 140796892/140811  |     | 07489502/cg0752499 |             |             |             |             |          |          |  |
|          |         |   | 312/140822776/140 |     | 7/cg07539798/cg076 |             |             |             |             |          |          |  |
|          |         |   | 793470/140810137/ |     | 08474/cg07620533/c |             |             |             |             |          |          |  |
|          |         |   | 140810260/140857  |     | g07730329/cg078027 |             |             |             |             |          |          |  |
|          |         |   | 813/140807666/140 |     | 10/cg08155325/cg08 |             |             |             |             |          |          |  |
|          |         |   | 800983/140798161/ |     | 200869/cg08395122/ |             |             |             |             |          |          |  |
|          |         |   | 140797509/140818  |     | cg08935238/cg08938 |             |             |             |             |          |          |  |
|          |         |   | 522/140857474/140 |     | 584/cg09484752/cg0 |             |             |             |             |          |          |  |
|          |         |   | 810920/140797280/ |     | 9581226/cg09639151 |             |             |             |             |          |          |  |
|          |         |   | 140800629/140812  |     | /cg10435816/cg1067 |             |             |             |             |          |          |  |
|          |         |   | 464/140855582/140 |     | 9597/cg10805220/cg |             |             |             |             |          |          |  |
|          |         |   | 792684/140810161/ |     | 10858746/cg1091754 |             |             |             |             |          |          |  |

|          |         |   |                   |                    |                    |             |             |             |          |          |  |
|----------|---------|---|-------------------|--------------------|--------------------|-------------|-------------|-------------|----------|----------|--|
|          |         |   | 140855562/14085/  | cg00281842/cg00589 |                    |             |             |             |          |          |  |
|          |         |   | 995/140807787/140 | 850/cg00808170/cg0 |                    |             |             |             |          |          |  |
|          |         |   | 806126/140867386/ | 0888801/cg00943245 |                    |             |             |             |          |          |  |
|          |         |   | 140821244/140811  | /cg01000954/cg0122 |                    |             |             |             |          |          |  |
|          |         |   | 520/140802831/140 | 4715/cg01729977/cg |                    |             |             |             |          |          |  |
|          |         |   | 864578/140888468/ | 02022733/cg0205665 |                    |             |             |             |          |          |  |
|          |         |   | 140821687/140873  | 3/cg02161292/cg022 |                    |             |             |             |          |          |  |
|          |         |   | 765/140810404/140 | 49657/cg02267483/c |                    |             |             |             |          |          |  |
|          |         |   | 855547/140810109/ | g02430347/cg024529 |                    |             |             |             |          |          |  |
|          |         |   | 140803130/140855  | 44/cg02715006/cg02 |                    |             |             |             |          |          |  |
|          |         |   | 463/140864593/140 | 780295/cg03640756/ |                    |             |             |             |          |          |  |
|          |         |   | 800495/140868130/ | cg03892308/cg03898 |                    |             |             |             |          |          |  |
|          |         |   | 140811253/140819  | 832/cg04080041/cg0 |                    |             |             |             |          |          |  |
|          |         |   | 300/140856330/140 | 4117404/cg04453180 |                    |             |             |             |          |          |  |
|          |         |   | 802804/140871156/ | /cg04845915/cg0496 |                    |             |             |             |          |          |  |
|          |         |   | 140870164/140824  | 4031/cg05149776/cg |                    |             |             |             |          |          |  |
|          |         |   | 037/140805732/140 | 05197036/cg0567047 |                    |             |             |             |          |          |  |
|          |         |   | 800586/140864276/ | 2/cg05870739/cg064 |                    |             |             |             |          |          |  |
|          |         |   | 140800929/140802  | 28620/cg06572465/c |                    |             |             |             |          |          |  |
| GENEBODY | PCDHGB7 | 5 | 135/140856469/140 | g07179872/cg074459 | 0.523604059        | 0.600720122 | 0.685587092 | 0.161983033 | 1.46E-10 | 3.22E-09 |  |
|          |         |   | 107               | 855857/140811642/  | 63/cg07448606/cg07 |             |             |             |          |          |  |
|          |         |   | 140811312/140822  | 489502/cg07539798/ |                    |             |             |             |          |          |  |
|          |         |   | 776/140810137/140 | cg07608474/cg07730 |                    |             |             |             |          |          |  |
|          |         |   | 810260/140857813/ | 329/cg07802710/cg0 |                    |             |             |             |          |          |  |
|          |         |   | 140807666/140800  | 8155325/cg08200869 |                    |             |             |             |          |          |  |
|          |         |   | 983/140818522/140 | /cg08395122/cg0948 |                    |             |             |             |          |          |  |
|          |         |   | 857474/140810920/ | 4752/cg09581226/cg |                    |             |             |             |          |          |  |
|          |         |   | 140800629/140812  | 09639151/cg1067959 |                    |             |             |             |          |          |  |
|          |         |   | 464/140855582/140 | 7/cg10805220/cg108 |                    |             |             |             |          |          |  |
|          |         |   | 810161/140865433/ | 58746/cg11647681/c |                    |             |             |             |          |          |  |
|          |         |   | 140864834/140810  | g11830096/cg121459 |                    |             |             |             |          |          |  |
|          |         |   | 123/140872334/140 | 07/cg12304520/cg12 |                    |             |             |             |          |          |  |
|          |         |   | 864474/140857192/ | 487901/cg12648074/ |                    |             |             |             |          |          |  |
|          |         |   | 140807490/140821  | cg12877039/cg12972 |                    |             |             |             |          |          |  |
|          |         |   | 425/140801286/140 | 081/cg13023584/cg1 |                    |             |             |             |          |          |  |
|          |         |   | 801354/140855482/ | 3598256/cg13718539 |                    |             |             |             |          |          |  |
|          |         |   | 140810726/140857  | /cg13993336/cg1425 |                    |             |             |             |          |          |  |
|          |         |   | 941/140805681/140 | 3517/cg14672084/cg |                    |             |             |             |          |          |  |
|          |         |   | 890718/140855469/ | 14681511/cg1500440 |                    |             |             |             |          |          |  |

|          |         |    |                                                                                                                                                                                                                                                                                                                                                                                                                                                                                                             |    |                                                                                                                                                                                                                                                                                                                                                                                                                                                                                                                                                         |             |             |             |              |          |          |
|----------|---------|----|-------------------------------------------------------------------------------------------------------------------------------------------------------------------------------------------------------------------------------------------------------------------------------------------------------------------------------------------------------------------------------------------------------------------------------------------------------------------------------------------------------------|----|---------------------------------------------------------------------------------------------------------------------------------------------------------------------------------------------------------------------------------------------------------------------------------------------------------------------------------------------------------------------------------------------------------------------------------------------------------------------------------------------------------------------------------------------------------|-------------|-------------|-------------|--------------|----------|----------|
| GENEBODY | PCDHGC3 | 5  | 140857995/140867<br>386/140864578/140<br>888468/140873765/<br>140864593/140868<br>130/140856330/140<br>871156/140870164/<br>140864276/140856<br>469/140855857/140<br>857813/140857474/<br>140865433/140864<br>834/140872334/140<br>864474/140857192/<br>140857941/140890<br>718/140864701/140<br>864549/140868422/<br>140871464/140861<br>242/140867724/140<br>871590/140857889/<br>140874572/140868<br>686/140864733/140<br>858046/140887302/<br>140871385/140856<br>971/140857647/140<br>864020/140858107 | 40 | cg00589850/cg00943<br>245/cg02022733/cg0<br>2056653/cg02249657<br>/cg03640756/cg0389<br>8832/cg04453180/cg<br>04964031/cg0514977<br>6/cg06428620/cg074<br>45963/cg07448606/c<br>g08155325/cg095812<br>26/cg11830096/cg12<br>145907/cg12487901/<br>cg12648074/cg12877<br>039/cg14672084/cg1<br>5004405/cg15361590<br>/cg15949044/cg1598<br>8320/cg16032518/cg<br>16548916/cg1710838<br>3/cg17297238/cg188<br>58331/cg21101631/c<br>g22082176/cg234454<br>61/cg24024424/cg24<br>155123/cg24619378/<br>cg24942747/cg25600<br>472/cg26890354/cg2<br>7639030 | 0.502213763 | 0.585331792 | 0.687209331 | 0.184995567  | 4.46E-12 | 3.47E-10 |
| GENEBODY | PCGEM1  | 2  | 193640765                                                                                                                                                                                                                                                                                                                                                                                                                                                                                                   | 1  | cg21560241                                                                                                                                                                                                                                                                                                                                                                                                                                                                                                                                              | 0.60606139  | 0.506509228 | 0.433380836 | -0.172680554 | 1.51E-07 | 9.01E-07 |
| GENEBODY | PCGF1   | 2  | 74734085/7473460<br>9/74732471                                                                                                                                                                                                                                                                                                                                                                                                                                                                              | 3  | cg03964696/cg22475<br>904/cg24060542                                                                                                                                                                                                                                                                                                                                                                                                                                                                                                                    | 0.39947488  | 0.316880961 | 0.240294223 | -0.159180657 | 4.87E-10 | 7.84E-09 |
| GENEBODY | PDCD1   | 2  | 242799312/242799<br>562/242798512/242<br>794981/242794854/<br>242799489/242794<br>941/242794928/242<br>799553/242798478/<br>242795082/242798<br>443/242799460/242<br>797846/242795282                                                                                                                                                                                                                                                                                                                       | 15 | cg01632474/cg03903<br>296/cg04789125/cg0<br>6291111/cg07281781<br>/cg09031938/cg0931<br>9815/cg10526431/cg<br>10994870/cg1515311<br>8/cg16720890/cg206<br>01192/cg21670983/c<br>g24984297/cg257987<br>82                                                                                                                                                                                                                                                                                                                                                | 0.753095851 | 0.644023415 | 0.53902606  | -0.21406979  | 1.49E-14 | 1.99E-11 |
| GENEBODY | PDS5B   | 13 | 33224942/3330596<br>6                                                                                                                                                                                                                                                                                                                                                                                                                                                                                       | 2  | cg18694313/cg23199<br>907                                                                                                                                                                                                                                                                                                                                                                                                                                                                                                                               | 0.63483244  | 0.56108645  | 0.464925668 | -0.169906772 | 8.19E-09 | 7.50E-08 |



|          |         |    |                                                                                                                                                                                                                       |                                                                                                                                                                                                                                                              |                                                                                                                                                                                                          |             |             |             |              |             |             |
|----------|---------|----|-----------------------------------------------------------------------------------------------------------------------------------------------------------------------------------------------------------------------|--------------------------------------------------------------------------------------------------------------------------------------------------------------------------------------------------------------------------------------------------------------|----------------------------------------------------------------------------------------------------------------------------------------------------------------------------------------------------------|-------------|-------------|-------------|--------------|-------------|-------------|
| GENEBODY | PDX1    | 13 | 28497401/2849735<br>9/28495173/284959<br>08/28495600/28496<br>641/28494996/2849<br>8384/28496082/284<br>96812/28498544/28 19<br>498334/28496413/2<br>8498161/28497117/<br>28495598/2849845<br>1/28495638/284980<br>91 | cg01622304/cg03860<br>037/cg03881663/cg0<br>3907847/cg04109923<br>/cg05395403/cg0786<br>0673/cg09975620/cg<br>10782668/cg1223801<br>5/cg12815918/cg163<br>02790/cg18064631/c<br>g21900495/cg222681<br>37/cg22578843/cg24<br>601716/cg24983523/<br>cg25299895 | 0.261283901                                                                                                                                                                                              | 0.319019298 | 0.44655515  | 0.185271249 | 4.23E-09     | 4.38E-08    |             |
| GENEBODY | PER4    | 7  | 9674902                                                                                                                                                                                                               | 1                                                                                                                                                                                                                                                            | cg00033909                                                                                                                                                                                               | 0.313526365 | 0.208034044 | 0.153759197 | -0.159767168 | 5.55E-12    | 3.89E-10    |
| GENEBODY | PGAM2   | 7  | 44103276/4410458<br>4                                                                                                                                                                                                 | 2                                                                                                                                                                                                                                                            | cg02237368/cg21448<br>875                                                                                                                                                                                | 0.51583931  | 0.463647508 | 0.358427059 | -0.157412251 | 1.50E-11    | 7.17E-10    |
| GENEBODY | PGLYRP3 | 1  | 153280070                                                                                                                                                                                                             | 1                                                                                                                                                                                                                                                            | cg12428378                                                                                                                                                                                               | 0.789180925 | 0.6893515   | 0.5492556   | -0.239925325 | 1.16E-06    | 5.47E-06    |
| GENEBODY | PHOX2B  | 4  | 41748676/4175036<br>2/41749361/417494<br>43/41747895/41749 8<br>810/41748193/4174<br>8857                                                                                                                             | 8                                                                                                                                                                                                                                                            | cg03742238/cg05323<br>533/cg05722504/cg0<br>7907386/cg10192893<br>/cg14755019/cg1631<br>8271/cg22300957                                                                                                  | 0.3750638   | 0.454136313 | 0.568124445 | 0.193060645  | 1.17E-08    | 1.01E-07    |
| GENEBODY | PHYHD1  | 9  | 131684923                                                                                                                                                                                                             | 1                                                                                                                                                                                                                                                            | cg14299940                                                                                                                                                                                               | 0.279666115 | 0.426487094 | 0.515844215 | 0.2361781    | 8.91E-06    | 3.31E-05    |
| GENEBODY | PIF1    | 15 | 65116255/6511521<br>8/65113714/651161 4<br>94                                                                                                                                                                         | 4                                                                                                                                                                                                                                                            | cg02018277/cg05869<br>754/cg20714715/cg2<br>3845646                                                                                                                                                      | 0.469714646 | 0.583327327 | 0.661337078 | 0.191622433  | 3.08E-09    | 3.40E-08    |
| GENEBODY | PITX1   | 5  | 134369116/134367<br>090/134366534/134<br>366831/134369017/<br>134366162/134364<br>968/134365520/134 15<br>367099/134368682/<br>134364717/134366<br>914/134365728/134<br>366377/134367394                              | 15                                                                                                                                                                                                                                                           | cg00089224/cg02100<br>373/cg02213684/cg0<br>2495310/cg02948884<br>/cg03347590/cg0410<br>1060/cg05171952/cg<br>08373003/cg1151228<br>0/cg12673103/cg137<br>15631/cg18606375/c<br>g21614303/cg230646<br>01 | 0.242394234 | 0.334946234 | 0.466915806 | 0.224521572  | 4.64E-09    | 4.71E-08    |
| GENEBODY | PKD2L1  | 10 | 102050107                                                                                                                                                                                                             | 1                                                                                                                                                                                                                                                            | cg06298666                                                                                                                                                                                               | 0.74549662  | 0.621716717 | 0.524351414 | -0.221145206 | 1.37E-07    | 8.25E-07    |
| GENEBODY | PKHD1L1 | 8  | 110497696/110470<br>148/110520471/110 4<br>456058                                                                                                                                                                     | 4                                                                                                                                                                                                                                                            | cg01995086/cg19153<br>329/cg26971030/cg2<br>7519599                                                                                                                                                      | 0.78696521  | 0.715398094 | 0.606944807 | -0.180020403 | 3.18E-08    | 2.34E-07    |
| GENEBODY | PLA2G2D | 1  | 20441579/2044566<br>2                                                                                                                                                                                                 | 2                                                                                                                                                                                                                                                            | cg05048624/cg14321<br>743                                                                                                                                                                                | 0.72265616  | 0.631564772 | 0.562409241 | -0.160246919 | 0.000421383 | 0.001074034 |

|          |          |    |                                                                                                    |   |                                                                                                                                       |             |             |             |              |          |          |
|----------|----------|----|----------------------------------------------------------------------------------------------------|---|---------------------------------------------------------------------------------------------------------------------------------------|-------------|-------------|-------------|--------------|----------|----------|
| GENEBODY | PLA2G4F  | 15 | 42448079/4244825<br>9/42447840/424479<br>89/42448786/42448 8<br>234/42448760/4243<br>4040          |   | cg00150025/cg05397<br>010/cg07720646/cg0<br>9927287/cg10917153<br>/cg13065504/cg1692<br>0001/cg22490420                               | 0.590224595 | 0.49206877  | 0.405089621 | -0.185134974 | 8.79E-11 | 2.21E-09 |
| GENEBODY | PLK5P    | 19 | 1526651/1526463/1<br>524449/1525453/15<br>25316/1528418/152 10<br>4256/1525705/1526<br>562/1529763 |   | cg00851261/cg02351<br>555/cg02789965/cg0<br>2872767/cg05308639<br>/cg09760057/cg1830<br>0589/cg21964231/cg<br>21991195/cg2727762<br>0 | 0.69735837  | 0.589673203 | 0.529644929 | -0.167713441 | 3.69E-12 | 3.14E-10 |
| GENEBODY | PLS1     | 3  | 142383107                                                                                          | 1 | cg05652551                                                                                                                            | 0.60574264  | 0.470045383 | 0.354475555 | -0.251267085 | 9.83E-11 | 2.38E-09 |
| GENEBODY | PLUNC    | 20 | 31828749                                                                                           | 1 | cg06576557                                                                                                                            | 0.45452721  | 0.317574856 | 0.199336355 | -0.255190855 | 1.62E-17 | 1.41E-13 |
| GENEBODY | PMCHL2   | 5  | 70671764                                                                                           | 1 | cg14277764                                                                                                                            | 0.59191122  | 0.49622845  | 0.436196677 | -0.155714543 | 7.32E-07 | 3.64E-06 |
| GENEBODY | PNLIPRP3 | 10 | 118204535                                                                                          | 1 | cg12200270                                                                                                                            | 0.51827738  | 0.371370589 | 0.233733395 | -0.284543985 | 1.33E-13 | 5.53E-11 |
| GENEBODY | POLR2L   | 11 | 840487/841335/841<br>376/840407                                                                    | 4 | cg01858337/cg03116<br>740/cg11173246/cg1<br>3806461                                                                                   | 0.727548019 | 0.644383175 | 0.559471714 | -0.168076305 | 2.26E-08 | 1.76E-07 |
| GENEBODY | POU4F2   | 4  | 147561669/147561<br>203/147561775/147<br>561339/147561900/<br>147560770                            | 6 | cg00505045/cg06083<br>330/cg16887264/cg1<br>9134568/cg19555331<br>/cg25406138                                                         | 0.443891576 | 0.549185858 | 0.675454296 | 0.23156272   | 8.70E-12 | 5.04E-10 |
| GENEBODY | POU4F3   | 5  | 145719938/145719<br>413/145718965                                                                  | 3 | cg01819137/cg04701<br>505/cg18482268                                                                                                  | 0.359385572 | 0.427875628 | 0.538171253 | 0.178785681  | 2.08E-07 | 1.20E-06 |
| GENEBODY | PPFIA2   | 12 | 82123681/8176349<br>2/82121138/816944<br>51                                                        | 4 | cg19888369/cg20484<br>417/cg21665905/cg2<br>3926820                                                                                   | 0.606702677 | 0.457746524 | 0.321623797 | -0.28507888  | 1.48E-12 | 1.85E-10 |
| GENEBODY | PPP1R14D | 15 | 41118060                                                                                           | 1 | cg24886788                                                                                                                            | 0.404137775 | 0.311828256 | 0.232683264 | -0.171454511 | 2.73E-11 | 1.06E-09 |
| GENEBODY | PPP1R1B  | 17 | 37789575/3778471<br>1/37784024/377838<br>79/37784699/37785 9<br>426/37787862/3778<br>4895/37784694 |   | cg01894322/cg06068<br>801/cg08411435/cg0<br>9762778/cg14697334<br>/cg18575532/cg1952<br>6455/cg21320242/cg<br>24520381                | 0.450607712 | 0.361362085 | 0.290201517 | -0.160406195 | 1.54E-11 | 7.24E-10 |
| GENEBODY | PRAME    | 22 | 22899164                                                                                           | 1 | cg17648213                                                                                                                            | 0.639138815 | 0.528063828 | 0.4336709   | -0.205467915 | 3.59E-11 | 1.24E-09 |
| GENEBODY | PRAMEF20 | 1  | 13522252                                                                                           | 1 | cg11999044                                                                                                                            | 0.514005275 | 0.420667506 | 0.3360326   | -0.177972675 | 1.85E-11 | 8.18E-10 |
| GENEBODY | PRKAG3   | 2  | 219695072                                                                                          | 1 | cg16792548                                                                                                                            | 0.52770494  | 0.445790511 | 0.345442423 | -0.182262517 | 5.75E-12 | 3.96E-10 |

|          |        |    |                                                                                                             |    |                                                                                                                                     |             |             |             |              |             |             |
|----------|--------|----|-------------------------------------------------------------------------------------------------------------|----|-------------------------------------------------------------------------------------------------------------------------------------|-------------|-------------|-------------|--------------|-------------|-------------|
| GENEBODY | PRLHR  | 10 | 120354248/120354081/120354627                                                                               | 3  | cg11705975/cg13654588/cg15748507                                                                                                    | 0.57032264  | 0.636302896 | 0.722855755 | 0.152533115  | 4.13E-11    | 1.33E-09    |
| GENEBODY | PROL1  | 4  | 71270447                                                                                                    | 1  | cg08712190                                                                                                                          | 0.67536763  | 0.574553539 | 0.489292977 | -0.186074653 | 8.03E-05    | 0.000239187 |
| GENEBODY | PRR15L | 17 | 46030312                                                                                                    | 1  | cg18052778                                                                                                                          | 0.501444175 | 0.407836833 | 0.336730273 | -0.164713902 | 1.38E-10    | 3.09E-09    |
| GENEBODY | PRSS45 | 3  | 46785957                                                                                                    | 1  | cg01565013                                                                                                                          | 0.621352525 | 0.520072494 | 0.394563973 | -0.226788552 | 1.07E-07    | 6.67E-07    |
| GENEBODY | PRSS8  | 16 | 31146682                                                                                                    | 1  | cg04275947                                                                                                                          | 0.51205637  | 0.441351806 | 0.360337309 | -0.151719061 | 5.23E-09    | 5.21E-08    |
| GENEBODY | PSG1   | 19 | 43383405                                                                                                    | 1  | cg25477904                                                                                                                          | 0.61481569  | 0.545823711 | 0.461511968 | -0.153303722 | 1.23E-09    | 1.60E-08    |
| GENEBODY | PSG3   | 19 | 43240516                                                                                                    | 1  | cg24313473                                                                                                                          | 0.44921919  | 0.344332911 | 0.270879386 | -0.178339804 | 2.60E-11    | 1.03E-09    |
| GENEBODY | PSG4   | 19 | 43709360                                                                                                    | 1  | cg27257987                                                                                                                          | 0.53977219  | 0.477842459 | 0.3736521   | -0.16612009  | 0.003771619 | 0.007893927 |
| GENEBODY | PSG8   | 19 | 43265778                                                                                                    | 1  | cg10390696                                                                                                                          | 0.6562031   | 0.5236886   | 0.437681218 | -0.218521882 | 2.43E-10    | 4.64E-09    |
| GENEBODY | PSG9   | 19 | 43769725                                                                                                    | 1  | cg15401477                                                                                                                          | 0.445327775 | 0.313800694 | 0.242209927 | -0.203117848 | 1.35E-09    | 1.71E-08    |
| GENEBODY | PSMG3  | 7  | 1607787/1607868/1607601/1607408/1607663                                                                     | 5  | cg00375608/cg13042250/cg18958693/cg20151476/cg23903588                                                                              | 0.663483947 | 0.493261415 | 0.37804747  | -0.285436477 | 1.68E-11    | 7.66E-10    |
| GENEBODY | PTCH2  | 1  | 45288012/45308248/45308298/45297445/45304915/45292204                                                       | 6  | cg04145643/cg09941208/cg15329642/cg15684702/cg18646347/cg26297462                                                                   | 0.501116826 | 0.416925865 | 0.347265825 | -0.153851001 | 4.88E-10    | 7.86E-09    |
| GENEBODY | PTCHD3 | 10 | 27698606                                                                                                    | 1  | cg07978901                                                                                                                          | 0.696140455 | 0.605657967 | 0.504611064 | -0.191529391 | 3.42E-07    | 1.86E-06    |
| GENEBODY | PURG   | 8  | 30888801/30859349/30888925                                                                                  | 3  | cg02638909/cg03325522/cg18907656                                                                                                    | 0.764198185 | 0.657423417 | 0.591874309 | -0.172323876 | 3.18E-09    | 3.48E-08    |
| GENEBODY | PWRN1  | 15 | 24823713                                                                                                    | 1  | cg15029747                                                                                                                          | 0.51649206  | 0.401391294 | 0.297340064 | -0.219151996 | 4.62E-10    | 7.49E-09    |
| GENEBODY | PYY    | 17 | 42030842/42030479                                                                                           | 2  | cg01474257/cg25830696                                                                                                               | 0.304793746 | 0.368595931 | 0.465619647 | 0.160825901  | 0.000456745 | 0.001156691 |
| GENEBODY | R3HDM1 | 2  | 136422981/136423459                                                                                         | 2  | cg01243312/cg05675362                                                                                                               | 0.5233833   | 0.409603739 | 0.343384568 | -0.179998732 | 3.23E-09    | 3.52E-08    |
| GENEBODY | R3HDML | 20 | 42967118                                                                                                    | 1  | cg08021653                                                                                                                          | 0.60225943  | 0.513828372 | 0.43714995  | -0.16510948  | 8.07E-10    | 1.15E-08    |
| GENEBODY | RAB30  | 11 | 82708076                                                                                                    | 1  | cg01250845                                                                                                                          | 0.55726795  | 0.451751689 | 0.373305755 | -0.183962195 | 6.29E-10    | 9.45E-09    |
| GENEBODY | RARB   | 3  | 25614606/25493807/25616120/25483002/25635650/25634257/25482937/25616035/25623905/25513799/25472652/25583274 | 12 | cg01697477/cg01794805/cg02746691/cg06705767/cg07405178/cg11151405/cg15011775/cg20981919/cg21646032/cg22231424/cg23518541/cg27574595 | 0.555555378 | 0.478943686 | 0.401504423 | -0.154050955 | 6.69E-12    | 4.35E-10    |

|          |         |    |                                                                                                                                                                             |    |                                                                                                                                                                                           |             |             |             |              |          |          |
|----------|---------|----|-----------------------------------------------------------------------------------------------------------------------------------------------------------------------------|----|-------------------------------------------------------------------------------------------------------------------------------------------------------------------------------------------|-------------|-------------|-------------|--------------|----------|----------|
| GENEBODY | RASGRP3 | 2  | 33747506/3378036<br>6/33744326/337556<br>53                                                                                                                                 | 4  | cg16165651/cg18200<br>741/cg26369614/cg2<br>7236007                                                                                                                                       | 0.64153703  | 0.5370365   | 0.430480862 | -0.211056168 | 7.73E-10 | 1.11E-08 |
| GENEBODY | RBM46   | 4  | 155720155                                                                                                                                                                   | 1  | cg03174933                                                                                                                                                                                | 0.7254943   | 0.602266711 | 0.429098486 | -0.296395814 | 1.77E-09 | 2.17E-08 |
| GENEBODY | RDX     | 11 | 110108538/110108<br>737/110120271/110<br>122959                                                                                                                             | 4  | cg02243606/cg03141<br>158/cg08451637/cg1<br>9336191                                                                                                                                       | 0.831112714 | 0.741504307 | 0.638808809 | -0.192303905 | 2.89E-08 | 2.17E-07 |
| GENEBODY | RFPL3S  | 22 | 32756957/3276700<br>5                                                                                                                                                       | 2  | cg04252889/cg22217<br>678                                                                                                                                                                 | 0.648991785 | 0.538701578 | 0.412455345 | -0.23653644  | 7.85E-10 | 1.13E-08 |
| GENEBODY | RGS1    | 1  | 192548288                                                                                                                                                                   | 1  | cg22360028                                                                                                                                                                                | 0.50273743  | 0.400195206 | 0.327457282 | -0.175280148 | 4.32E-09 | 4.45E-08 |
| GENEBODY | RIMS3   | 1  | 41094365                                                                                                                                                                    | 1  | cg07920414                                                                                                                                                                                | 0.393852515 | 0.2902933   | 0.229636573 | -0.164215942 | 1.02E-07 | 6.42E-07 |
| GENEBODY | RNASE11 | 14 | 21052361                                                                                                                                                                    | 1  | cg01620379                                                                                                                                                                                | 0.49821091  | 0.403106261 | 0.318064314 | -0.180146596 | 5.63E-09 | 5.54E-08 |
| GENEBODY | RNASE9  | 14 | 21024898                                                                                                                                                                    | 1  | cg16701266                                                                                                                                                                                | 0.47897108  | 0.347028728 | 0.241015545 | -0.237955535 | 1.80E-10 | 3.73E-09 |
| GENEBODY | RNF43   | 17 | 56435455/5645452<br>8/56432612/564774<br>76/56466866                                                                                                                        | 5  | cg04544475/cg04780<br>984/cg11610460/cg1<br>8366480/cg21644778                                                                                                                            | 0.669385706 | 0.55995674  | 0.483692099 | -0.185693607 | 1.03E-14 | 1.49E-11 |
| GENEBODY | RPL26   | 17 | 8282746                                                                                                                                                                     | 1  | cg03734677                                                                                                                                                                                | 0.66792116  | 0.571355056 | 0.517033936 | -0.150887224 | 1.73E-06 | 7.69E-06 |
| GENEBODY | RSAD2   | 2  | 7029602                                                                                                                                                                     | 1  | cg00186143                                                                                                                                                                                | 0.739571515 | 0.611205006 | 0.449552891 | -0.290018624 | 3.40E-08 | 2.48E-07 |
| GENEBODY | RSPH3   | 6  | 159420005/159416<br>530                                                                                                                                                     | 2  | cg02895126/cg24249<br>648                                                                                                                                                                 | 0.70916378  | 0.545194467 | 0.439121773 | -0.270042007 | 3.04E-07 | 1.67E-06 |
| GENEBODY | RSPO3   | 6  | 127475733/127441<br>151/127440510/127<br>484100/127441060/<br>127440843/127441<br>605/127440729/127<br>441704/127442648/<br>127441199/127441<br>117/127441993/127<br>513912 | 14 | cg00042081/cg00752<br>628/cg01043019/cg0<br>1694400/cg02690609<br>/cg03778155/cg0398<br>3331/cg04974584/cg<br>06437464/cg0952670<br>8/cg20172795/cg232<br>32563/cg24470447/c<br>g25671837 | 0.231508318 | 0.306698319 | 0.399169354 | 0.167661036  | 3.62E-06 | 1.48E-05 |
| GENEBODY | RUFY4   | 2  | 218938006/218938<br>889/218946721/218<br>937982/218937635                                                                                                                   | 5  | cg01173650/cg01712<br>671/cg06271623/cg2<br>0316538/cg22940954                                                                                                                            | 0.543692453 | 0.445634296 | 0.334394413 | -0.20929804  | 4.87E-11 | 1.50E-09 |
| GENEBODY | S100A6  | 1  | 153507779/153507<br>498                                                                                                                                                     | 2  | cg01910639/cg16291<br>048                                                                                                                                                                 | 0.470612165 | 0.360896036 | 0.264822557 | -0.205789608 | 9.48E-13 | 1.43E-10 |
| GENEBODY | S100A7  | 1  | 153430296                                                                                                                                                                   | 1  | cg00325910                                                                                                                                                                                | 0.427837735 | 0.324137928 | 0.236060509 | -0.191777226 | 1.34E-13 | 5.53E-11 |
| GENEBODY | SAA4    | 11 | 18254355                                                                                                                                                                    | 1  | cg20357397                                                                                                                                                                                | 0.74639391  | 0.693612033 | 0.595278677 | -0.151115233 | 3.16E-07 | 1.73E-06 |
| GENEBODY | SAMD9   | 7  | 92731118                                                                                                                                                                    | 1  | cg24669786                                                                                                                                                                                | 0.859169225 | 0.762183572 | 0.692919177 | -0.166250048 | 1.16E-05 | 4.18E-05 |

|          |           |    |                                                                                                  |   |                                                                                                                        |             |             |             |              |          |          |
|----------|-----------|----|--------------------------------------------------------------------------------------------------|---|------------------------------------------------------------------------------------------------------------------------|-------------|-------------|-------------|--------------|----------|----------|
| GENEBODY | SAP30BP   | 17 | 73676600/7366460<br>6/73667384/736896<br>41/73696509/73679<br>983                                | 6 | cg02124060/cg03660<br>451/cg04546917/cg0<br>6708315/cg18563987<br>/cg20938708                                          | 0.704322185 | 0.605202156 | 0.540682807 | -0.163639378 | 7.76E-13 | 1.26E-10 |
| GENEBODY | SBSN      | 19 | 36017061                                                                                         | 1 | cg06924602                                                                                                             | 0.56526531  | 0.384811378 | 0.283984809 | -0.281280501 | 1.22E-12 | 1.62E-10 |
| GENEBODY | SCAMP5    | 15 | 75307476                                                                                         | 1 | cg16226627                                                                                                             | 0.62310084  | 0.504759028 | 0.391233559 | -0.231867281 | 3.09E-10 | 5.55E-09 |
| GENEBODY | SCG2      | 2  | 224462651                                                                                        | 1 | cg05986623                                                                                                             | 0.647967565 | 0.507988094 | 0.365699209 | -0.282268356 | 3.37E-10 | 5.92E-09 |
| GENEBODY | SCGB3A1   | 5  | 180017846/180017<br>349/180017623/180<br>017689/180018201/<br>180018102                          | 6 | cg07317366/cg13004<br>587/cg16585682/cg1<br>8652367/cg19897330<br>/cg21919857                                          | 0.20540903  | 0.254657704 | 0.411046131 | 0.205637101  | 1.08E-05 | 3.90E-05 |
| GENEBODY | SCN10A    | 3  | 38772426/3883517<br>9/38765009/387624<br>83                                                      | 4 | cg00877619/cg01792<br>749/cg11595270/cg1<br>9255722                                                                    | 0.600568547 | 0.492276489 | 0.360297566 | -0.24027098  | 2.10E-11 | 8.89E-10 |
| GENEBODY | SCN2A     | 2  | 166152734/166236<br>760/166215248/166<br>226560                                                  | 4 | cg00508771/cg15239<br>914/cg18477797/cg2<br>0784295                                                                    | 0.708573813 | 0.632781296 | 0.537647944 | -0.170925868 | 1.71E-09 | 2.10E-08 |
| GENEBODY | SCN7A     | 2  | 167268207                                                                                        | 1 | cg19752565                                                                                                             | 0.643478245 | 0.573727228 | 0.472310959 | -0.171167286 | 7.16E-07 | 3.57E-06 |
| GENEBODY | SDR16C5   | 8  | 57228615                                                                                         | 1 | cg02141358                                                                                                             | 0.77667526  | 0.619863311 | 0.553771795 | -0.222903465 | 7.03E-07 | 3.52E-06 |
| GENEBODY | SECTM1    | 17 | 80280330/8028253<br>8                                                                            | 2 | cg14728380/cg22156<br>899                                                                                              | 0.531056395 | 0.448040711 | 0.37119458  | -0.159861815 | 9.15E-08 | 5.84E-07 |
| GENEBODY | SELE      | 1  | 169696560                                                                                        | 1 | cg11132223                                                                                                             | 0.698568435 | 0.566948606 | 0.515794745 | -0.18277369  | 7.40E-07 | 3.67E-06 |
| GENEBODY | SELV      | 19 | 40007922                                                                                         | 1 | cg23201817                                                                                                             | 0.60075549  | 0.441228961 | 0.375011618 | -0.225743872 | 3.20E-11 | 1.16E-09 |
| GENEBODY | SEMA3D    | 7  | 84671333/8462971<br>7/84671582/846713<br>08/84672041                                             | 5 | cg00224028/cg00334<br>933/cg02607810/cg1<br>0318039/cg26801812                                                         | 0.621740985 | 0.502256144 | 0.43661905  | -0.185121935 | 3.71E-10 | 6.35E-09 |
| GENEBODY | SEMA3E    | 7  | 83087065/8308117<br>5/83146545/830571<br>20/83270795/83097<br>669/83240310/8305<br>5060/83043384 | 9 | cg01932197/cg01983<br>393/cg03542197/cg0<br>7449753/cg14411518<br>/cg14519356/cg1761<br>6677/cg19907520/cg<br>20587945 | 0.587243269 | 0.493482925 | 0.369837241 | -0.217406028 | 1.50E-10 | 3.28E-09 |
| GENEBODY | SERPINA11 | 14 | 94909938                                                                                         | 1 | cg23390762                                                                                                             | 0.64374094  | 0.58084855  | 0.456566041 | -0.187174899 | 1.05E-06 | 5.00E-06 |
| GENEBODY | SERPINB1  | 6  | 2840792                                                                                          | 1 | cg12586150                                                                                                             | 0.43386938  | 0.334061978 | 0.261824041 | -0.172045339 | 2.66E-10 | 4.97E-09 |
| GENEBODY | SERPINB10 | 18 | 61599595/6160196<br>2/61583699                                                                   | 3 | cg06156844/cg22371<br>956/cg23696618                                                                                   | 0.759464128 | 0.630211744 | 0.52250787  | -0.236956257 | 3.14E-10 | 5.63E-09 |
| GENEBODY | SERPINB7  | 18 | 61455379                                                                                         | 1 | cg26877588                                                                                                             | 0.82685499  | 0.764884033 | 0.651473605 | -0.175381385 | 9.57E-07 | 4.62E-06 |
| GENEBODY | SERPINC1  | 1  | 173883567                                                                                        | 1 | cg02586268                                                                                                             | 0.497175275 | 0.391417694 | 0.328000791 | -0.169174484 | 1.89E-11 | 8.32E-10 |
| GENEBODY | SERPINE3  | 13 | 51917676                                                                                         | 1 | cg10474597                                                                                                             | 0.3605226   | 0.262788778 | 0.19934715  | -0.16117545  | 3.62E-10 | 6.25E-09 |

|          |          |    |                                                                                                                        |    |                                                                                                                                                  |             |             |             |              |             |             |
|----------|----------|----|------------------------------------------------------------------------------------------------------------------------|----|--------------------------------------------------------------------------------------------------------------------------------------------------|-------------|-------------|-------------|--------------|-------------|-------------|
| GENEBODY | SERPING1 | 11 | 57365948                                                                                                               | 1  | cg12783776                                                                                                                                       | 0.26612314  | 0.292039233 | 0.416576991 | 0.150453851  | 0.000559872 | 0.001390666 |
| GENEBODY | SFRS3    | 6  | 36566732/3656848<br>8/36564708/365667<br>14                                                                            | 4  | cg00742040/cg11409<br>081/cg16422343/cg2<br>6942169                                                                                              | 0.698613524 | 0.606494385 | 0.542568906 | -0.156044618 | 1.68E-08    | 1.38E-07    |
| GENEBODY | SH2D5    | 1  | 21050526/2105046<br>7/21051448                                                                                         | 3  | cg11816566/cg13305<br>458/cg24673385                                                                                                             | 0.741931422 | 0.62319477  | 0.528363774 | -0.213567647 | 3.13E-11    | 1.15E-09    |
| GENEBODY | SIGLEC11 | 19 | 50458233                                                                                                               | 1  | cg11320438                                                                                                                                       | 0.550388875 | 0.486732694 | 0.379611105 | -0.17077777  | 1.29E-08    | 1.10E-07    |
| GENEBODY | SIGLEC12 | 19 | 52003566/5200082<br>5                                                                                                  | 2  | cg02957799/cg04698<br>472                                                                                                                        | 0.440317075 | 0.337004078 | 0.268105745 | -0.17221133  | 3.18E-13    | 7.92E-11    |
| GENEBODY | SIGLEC7  | 19 | 51647083                                                                                                               | 1  | cg14133643                                                                                                                                       | 0.729812865 | 0.662666811 | 0.562010818 | -0.167802047 | 1.80E-05    | 6.19E-05    |
| GENEBODY | SIGLEC8  | 19 | 51958448                                                                                                               | 1  | cg22767164                                                                                                                                       | 0.55893205  | 0.487302389 | 0.381472795 | -0.177459255 | 1.11E-07    | 6.87E-07    |
| GENEBODY | SIGLEC9  | 19 | 51629205                                                                                                               | 1  | cg17772789                                                                                                                                       | 0.69679793  | 0.624952517 | 0.531610955 | -0.165186975 | 9.81E-08    | 6.18E-07    |
| GENEBODY | SIRPB1   | 20 | 1578550                                                                                                                | 1  | cg27365103                                                                                                                                       | 0.57808395  | 0.488472844 | 0.364299777 | -0.213784173 | 4.42E-10    | 7.24E-09    |
| GENEBODY | SIRPB2   | 20 | 1471884                                                                                                                | 1  | cg00228984                                                                                                                                       | 0.552403565 | 0.466718389 | 0.3144807   | -0.237922865 | 5.16E-09    | 5.16E-08    |
| GENEBODY | SIRPD    | 20 | 1532543                                                                                                                | 1  | cg03726785                                                                                                                                       | 0.7268426   | 0.642669639 | 0.434093927 | -0.292748673 | 1.63E-10    | 3.50E-09    |
| GENEBODY | SIX6     | 14 | 60977961/6097735<br>3/60977054/609778<br>56/60976898/60977<br>300                                                      | 6  | cg00157572/cg04666<br>975/cg07862488/cg1<br>3019491/cg14511698<br>/cg19981568                                                                    | 0.32836159  | 0.43885034  | 0.592218193 | 0.263856603  | 6.21E-10    | 9.37E-09    |
| GENEBODY | SLA2     | 20 | 35258570                                                                                                               | 1  | cg12504877                                                                                                                                       | 0.53039884  | 0.612679844 | 0.693819777 | 0.163420937  | 2.37E-09    | 2.76E-08    |
| GENEBODY | SLC10A2  | 13 | 103702677                                                                                                              | 1  | cg08450807                                                                                                                                       | 0.682875125 | 0.540926783 | 0.3800928   | -0.302782325 | 2.81E-15    | 9.31E-12    |
| GENEBODY | SLC12A1  | 15 | 48590100/4857446<br>2/48513336/485677<br>56/48558703/48500<br>240/48515109                                             | 7  | cg10616694/cg13944<br>105/cg14167964/cg1<br>4229516/cg14857792<br>/cg14930674/cg2353<br>0596                                                     | 0.634908433 | 0.593407993 | 0.479649495 | -0.155258938 | 5.09E-08    | 3.50E-07    |
| GENEBODY | SLC12A2  | 5  | 127423333/127420<br>616/127420842/127<br>420684                                                                        | 4  | cg00308508/cg01159<br>515/cg13676672/cg1<br>9767477                                                                                              | 0.54067828  | 0.448886578 | 0.363778723 | -0.176899557 | 2.20E-10    | 4.34E-09    |
| GENEBODY | SLC16A9  | 10 | 61418311/6143421<br>1                                                                                                  | 2  | cg08535112/cg24603<br>972                                                                                                                        | 0.62364834  | 0.514581322 | 0.413492886 | -0.210155454 | 4.83E-09    | 4.87E-08    |
| GENEBODY | SLC17A6  | 11 | 22362874/2236542<br>8/22364185/223644<br>98/22363370/22364<br>837/22370099/2236<br>2708/22364961/223<br>64293/22363053 | 11 | cg04583232/cg04954<br>559/cg09150064/cg1<br>6079774/cg17298751<br>/cg20809470/cg2099<br>8200/cg21518089/cg<br>22371972/cg2415199<br>5/cg24454829 | 0.256200247 | 0.319089336 | 0.42193679  | 0.165736543  | 3.86E-08    | 2.76E-07    |
| GENEBODY | SLC22A14 | 3  | 38358115                                                                                                               | 1  | cg02646297                                                                                                                                       | 0.935948545 | 0.878315594 | 0.777767359 | -0.158181186 | 3.05E-05    | 9.99E-05    |
| GENEBODY | SLC22A25 | 11 | 62947565                                                                                                               | 1  | cg21961694                                                                                                                                       | 0.58823213  | 0.397193411 | 0.254938509 | -0.333293621 | 1.96E-13    | 6.68E-11    |

|          |             |    |                                                                                           |    |                                                                                                               |             |             |             |              |          |             |
|----------|-------------|----|-------------------------------------------------------------------------------------------|----|---------------------------------------------------------------------------------------------------------------|-------------|-------------|-------------|--------------|----------|-------------|
| GENEBODY | SLC25A27    | 6  | 46621499/46623767                                                                         | 2  | cg09906752/cg19101566                                                                                         | 0.540622888 | 0.435873275 | 0.350258071 | -0.190364817 | 2.45E-09 | 2.82E-08    |
| GENEBODY | SLC25A34    | 1  | 16063471                                                                                  | 1  | cg21821674                                                                                                    | 0.510818975 | 0.408981939 | 0.334374264 | -0.176444711 | 6.45E-11 | 1.79E-09    |
| GENEBODY | SLC25A41    | 19 | 6429807/6427642                                                                           | 2  | cg03722901/cg12096528                                                                                         | 0.714492875 | 0.65418885  | 0.555333198 | -0.159159677 | 9.09E-08 | 5.81E-07    |
| GENEBODY | SLC30A10    | 1  | 220097971/220099770/220092812/220092843                                                   | 4  | cg07005353/cg07948194/cg16814688/cg27629095                                                                   | 0.592067168 | 0.456409069 | 0.359776375 | -0.232290793 | 1.79E-12 | 2.11E-10    |
| GENEBODY | SLC30A8     | 8  | 118158694                                                                                 | 1  | cg22342922                                                                                                    | 0.766687865 | 0.686521844 | 0.609364455 | -0.15732341  | 1.16E-08 | 1.00E-07    |
| GENEBODY | SLC32A1     | 20 | 37354889/37355188/37356844/37354117/37354790/37356466/37355965/37354254/37353907/37355280 | 10 | cg01650904/cg02979819/cg05936441/cg06577241/cg10737118/cg12451099/cg13915754/cg16782807/cg26877715/cg27580318 | 0.261883662 | 0.352000615 | 0.470286055 | 0.208402393  | 1.15E-07 | 7.10E-07    |
| GENEBODY | SLC35A3     | 1  | 100462710                                                                                 | 1  | cg22872634                                                                                                    | 0.670819465 | 0.573185989 | 0.498241723 | -0.172577742 | 3.05E-09 | 3.37E-08    |
| GENEBODY | SLC36A2     | 5  | 150701709/150706354/150715737                                                             | 3  | cg05672174/cg24131671/ch.5.2843133R                                                                           | 0.67218711  | 0.561881144 | 0.424160064 | -0.248027046 | 3.60E-08 | 2.61E-07    |
| GENEBODY | SLC38A11    | 2  | 165769913/165760725                                                                       | 2  | cg01770810/cg16710042                                                                                         | 0.50200045  | 0.393432094 | 0.339617795 | -0.162382655 | 6.18E-08 | 4.14E-07    |
| GENEBODY | SLC4A1      | 17 | 42336559                                                                                  | 1  | cg14381448                                                                                                    | 0.64852355  | 0.592750511 | 0.486012477 | -0.162511073 | 7.82E-05 | 0.000233697 |
| GENEBODY | SLC4A7      | 3  | 27472828/27450401                                                                         | 2  | cg02344497/cg21518279                                                                                         | 0.534249245 | 0.447411633 | 0.375017536 | -0.159231709 | 7.61E-08 | 4.96E-07    |
| GENEBODY | SLC5A12     | 11 | 26710632                                                                                  | 1  | cg13363904                                                                                                    | 0.5921416   | 0.44639285  | 0.378547118 | -0.213594482 | 1.01E-08 | 8.95E-08    |
| GENEBODY | SLC6A1      | 3  | 11059480/11059050/11059010/11058924/11058951/11062724                                     | 6  | cg03047508/cg13418710/cg13889508/cg14673267/cg20241270/cg27082881                                             | 0.780468255 | 0.714899524 | 0.626942518 | -0.153525737 | 3.22E-08 | 2.37E-07    |
| GENEBODY | SLFN11      | 17 | 33679797                                                                                  | 1  | cg18124488                                                                                                    | 0.483705205 | 0.402775006 | 0.314314377 | -0.169390828 | 7.79E-12 | 4.74E-10    |
| GENEBODY | SMR3A       | 4  | 71230539                                                                                  | 1  | cg03300099                                                                                                    | 0.617099635 | 0.5218836   | 0.442332455 | -0.17476718  | 6.70E-07 | 3.37E-06    |
| GENEBODY | SNAP91      | 6  | 84417933/84415074/84418659/84418789/84417445/84418724/84289493/84418433                   | 8  | cg07335294/cg13886789/cg15950068/cg16334314/cg16457842/cg21688264/cg22048348/cg24190603                       | 0.452216863 | 0.524178642 | 0.64912056  | 0.196903697  | 1.37E-10 | 3.07E-09    |
| GENEBODY | SNN         | 16 | 11770053                                                                                  | 1  | cg04299808                                                                                                    | 0.69516685  | 0.557961833 | 0.506564973 | -0.188601877 | 4.93E-12 | 3.70E-10    |
| GENEBODY | SNORA8      | 11 | 93465580                                                                                  | 1  | cg23300851                                                                                                    | 0.43588728  | 0.345541061 | 0.283497809 | -0.152389471 | 2.11E-10 | 4.21E-09    |
| GENEBODY | SNORA80B    | 2  | 10586873                                                                                  | 1  | cg11668917                                                                                                    | 0.52827138  | 0.409054328 | 0.331031959 | -0.197239421 | 1.57E-12 | 1.90E-10    |
| GENEBODY | SNORD114-20 | 14 | 101447389                                                                                 | 1  | cg02351406                                                                                                    | 0.672360125 | 0.552280894 | 0.454482327 | -0.217877798 | 6.87E-10 | 1.02E-08    |
| GENEBODY | SNORD114-29 | 14 | 101456433                                                                                 | 1  | cg05899471                                                                                                    | 0.74318026  | 0.636617894 | 0.510825436 | -0.232354824 | 1.13E-08 | 9.79E-08    |

|          |             |    |                                                                                                                         |    |                                                                                                                                       |             |             |             |              |          |             |
|----------|-------------|----|-------------------------------------------------------------------------------------------------------------------------|----|---------------------------------------------------------------------------------------------------------------------------------------|-------------|-------------|-------------|--------------|----------|-------------|
| GENEBODY | SNORD116-16 | 15 | 25327919                                                                                                                | 1  | cg07897695                                                                                                                            | 0.773205945 | 0.714791161 | 0.558580695 | -0.21462525  | 7.82E-08 | 5.08E-07    |
| GENEBODY | SNORD116-18 | 15 | 25330536                                                                                                                | 1  | cg01871408                                                                                                                            | 0.739671495 | 0.652255172 | 0.539758991 | -0.199912504 | 6.93E-06 | 2.65E-05    |
| GENEBODY | SNORD16     | 15 | 66795208                                                                                                                | 1  | cg17352276                                                                                                                            | 0.641547075 | 0.546695517 | 0.453846477 | -0.187700598 | 1.95E-05 | 6.67E-05    |
| GENEBODY | SNORD64     | 15 | 25230295                                                                                                                | 1  | cg18488946                                                                                                                            | 0.6237695   | 0.556032011 | 0.405183841 | -0.218585659 | 4.65E-07 | 2.43E-06    |
| GENEBODY | SOX17       | 8  | 55371829/5537101<br>3/55372392/553713<br>69/55371392/55372<br>111                                                       | 6  | cg02222728/cg08044<br>097/cg12883523/cg1<br>5377283/cg16830930<br>/cg24150172                                                         | 0.485561365 | 0.577428062 | 0.690983374 | 0.205422009  | 3.59E-11 | 1.24E-09    |
| GENEBODY | SPATA4      | 4  | 177116464/177107<br>381                                                                                                 | 2  | cg18237999/cg25209<br>672                                                                                                             | 0.66166747  | 0.552719572 | 0.404006968 | -0.257660502 | 8.62E-08 | 5.53E-07    |
| GENEBODY | SPESP1      | 15 | 69223368/6922491<br>9/69223774/692238<br>95                                                                             | 4  | cg07775813/cg11147<br>497/cg13757194/cg2<br>6820811                                                                                   | 0.824374665 | 0.74509945  | 0.671473634 | -0.152901031 | 8.88E-12 | 5.07E-10    |
| GENEBODY | SPINK4      | 9  | 33240960/3324520<br>3                                                                                                   | 2  | cg04103317/cg13823<br>840                                                                                                             | 0.77713461  | 0.665101511 | 0.60163425  | -0.17550036  | 9.76E-10 | 1.33E-08    |
| GENEBODY | SPINK5L2    | 5  | 147552209                                                                                                               | 1  | cg17496990                                                                                                                            | 0.545994045 | 0.420752328 | 0.309993141 | -0.236000904 | 1.77E-10 | 3.70E-09    |
| GENEBODY | SPINK7      | 5  | 147693779/147692<br>173                                                                                                 | 2  | cg09574363/cg19404<br>190                                                                                                             | 0.697437005 | 0.556692133 | 0.4302947   | -0.267142305 | 2.78E-10 | 5.12E-09    |
| GENEBODY | SPINT2      | 19 | 38756382/3875796<br>1/38755753                                                                                          | 3  | cg17344048/cg19562<br>707/cg23090870                                                                                                  | 0.393932478 | 0.295429683 | 0.228395514 | -0.165536964 | 4.20E-11 | 1.35E-09    |
| GENEBODY | SPOCK3      | 4  | 167771886/168004<br>573/168154775/168<br>155219/167764264/<br>167771769/168155<br>222/168155124/167<br>764172/168096506 | 10 | cg05554543/cg05773<br>958/cg09571713/cg0<br>9608712/cg16251342<br>/cg18625258/cg2017<br>6349/cg21155380/cg<br>21824455/cg2200932<br>9 | 0.453577405 | 0.512232437 | 0.632375524 | 0.178798119  | 3.51E-08 | 2.55E-07    |
| GENEBODY | SPRR2A      | 1  | 153029005                                                                                                               | 1  | cg14966325                                                                                                                            | 0.761060365 | 0.6631467   | 0.55981105  | -0.201249315 | 7.97E-05 | 0.000237636 |
| GENEBODY | SPRY2       | 13 | 80911692/8091180<br>8/80911626                                                                                          | 3  | cg15374435/cg18607<br>411/cg22369786                                                                                                  | 0.367941898 | 0.278514331 | 0.21106884  | -0.156873057 | 1.28E-08 | 1.09E-07    |
| GENEBODY | SQLE        | 8  | 126011954/126012<br>434/126020660                                                                                       | 3  | cg00285394/cg14660<br>676/cg23587955                                                                                                  | 0.515154165 | 0.438658322 | 0.347991936 | -0.167162229 | 2.21E-06 | 9.55E-06    |
| GENEBODY | SRGN        | 10 | 70849854/7086370<br>5/70863740/708636<br>93/70863699                                                                    | 5  | cg02851793/cg06041<br>695/cg13645409/cg1<br>4898243/cg27141489                                                                        | 0.823076903 | 0.705401142 | 0.624587055 | -0.198489848 | 6.91E-08 | 4.57E-07    |
| GENEBODY | SSR2        | 1  | 155989796/155988<br>060                                                                                                 | 2  | cg21408061/cg26411<br>367                                                                                                             | 0.522984405 | 0.406757811 | 0.327529268 | -0.195455137 | 2.71E-10 | 5.03E-09    |
| GENEBODY | ST3GAL1     | 8  | 134474257/134475<br>410                                                                                                 | 2  | cg12292213/cg14640<br>789                                                                                                             | 0.76999565  | 0.535578333 | 0.411137514 | -0.358858136 | 4.06E-10 | 6.81E-09    |



|          |         |    |                                                                                                                                            |    |                                                                                                                                                                                           |             |             |             |              |          |          |
|----------|---------|----|--------------------------------------------------------------------------------------------------------------------------------------------|----|-------------------------------------------------------------------------------------------------------------------------------------------------------------------------------------------|-------------|-------------|-------------|--------------|----------|----------|
| GENEBODY | ST8SIA3 | 18 | 55021277/5502032<br>4/55021542/550216 5<br>69/55024674                                                                                     |    | cg00266920/cg03324<br>087/cg03614193/cg0<br>6641153/cg21518865                                                                                                                            | 0.36213622  | 0.460558244 | 0.551334091 | 0.189197871  | 1.89E-08 | 1.52E-07 |
| GENEBODY | STAP2   | 19 | 4326524/4328759/4<br>327106/4328745/43<br>32056/4326975/432 9<br>7350/4329581/4328<br>818                                                  |    | cg00852565/cg06776<br>703/cg10012059/cg1<br>4263858/cg15747839<br>/cg16200879/cg1905<br>8865/cg24294041/cg<br>25528916                                                                    | 0.478195827 | 0.578078872 | 0.644410325 | 0.166214498  | 3.10E-08 | 2.29E-07 |
| GENEBODY | STAR    | 8  | 38006196                                                                                                                                   | 1  | cg05580671                                                                                                                                                                                | 0.562135385 | 0.447851811 | 0.374502527 | -0.187632858 | 1.37E-08 | 1.15E-07 |
| GENEBODY | SUSD5   | 3  | 33259920/3324509<br>4/33259889                                                                                                             | 3  | cg10906602/cg15469<br>655/cg26298814                                                                                                                                                      | 0.250510585 | 0.410026472 | 0.54748555  | 0.296974965  | 5.72E-06 | 2.23E-05 |
| GENEBODY | SYNGR3  | 16 | 2041225/2043015/2<br>040627/2041512/20<br>40415/2041916/204<br>2466/2041826/2042<br>693/2040863/20421<br>03/2040981                        | 12 | cg04514123/cg04519<br>296/cg05239382/cg0<br>5915293/cg07519515<br>/cg09229918/cg0928<br>6183/cg10022722/cg<br>11220950/cg2648666<br>3/cg27028760/cg276<br>16661                           | 0.25555508  | 0.327057553 | 0.413159598 | 0.157604518  | 5.68E-09 | 5.57E-08 |
| GENEBODY | SYT4    | 18 | 40853833                                                                                                                                   | 1  | cg14462017                                                                                                                                                                                | 0.60654378  | 0.499964678 | 0.40323875  | -0.20330503  | 6.54E-07 | 3.29E-06 |
| GENEBODY | TAC3    | 12 | 57406900                                                                                                                                   | 1  | cg10901383                                                                                                                                                                                | 0.44128207  | 0.342484589 | 0.251898105 | -0.189383965 | 2.78E-11 | 1.07E-09 |
| GENEBODY | TAF1A   | 1  | 222759637                                                                                                                                  | 1  | cg05595429                                                                                                                                                                                | 0.72593794  | 0.652652933 | 0.555563195 | -0.170374745 | 5.18E-07 | 2.68E-06 |
| GENEBODY | TAF1D   | 11 | 93471889                                                                                                                                   | 1  | cg03607573                                                                                                                                                                                | 0.3560487   | 0.256713278 | 0.205521087 | -0.150527613 | 7.81E-10 | 1.12E-08 |
| GENEBODY | TAS1R3  | 1  | 1268793/1267436/1<br>267117/1268243/12<br>67252/1267745/126<br>7559/1268942/1267 14<br>193/1269219/12684<br>69/1268144/126720<br>1/1269399 |    | cg00002593/cg03402<br>404/cg04910752/cg0<br>6395167/cg06802641<br>/cg08621441/cg1006<br>5209/cg11808871/cg<br>13246026/cg1491189<br>2/cg16174225/cg183<br>86618/cg21396988/c<br>g26814650 | 0.680429774 | 0.565768714 | 0.503014251 | -0.177415523 | 1.17E-13 | 5.35E-11 |
| GENEBODY | TBX18   | 6  | 85473195/8547323<br>8/85473344/854719<br>73/85472307/85472<br>949/85473171                                                                 | 7  | cg03724990/cg06635<br>392/cg06733419/cg0<br>7590529/cg09988118<br>/cg22496809/cg2693<br>6429                                                                                              | 0.312994691 | 0.401298208 | 0.513361989 | 0.200367299  | 4.03E-09 | 4.21E-08 |
| GENEBODY | TCAP    | 17 | 37822045                                                                                                                                   | 1  | cg01680823                                                                                                                                                                                | 0.55338361  | 0.468120661 | 0.395565745 | -0.157817865 | 3.72E-16 | 2.15E-12 |

|          |          |    |                                                                                                                                                                                                                                           |    |                                                                                                                                                                                                                                                                                               |             |             |             |              |          |          |
|----------|----------|----|-------------------------------------------------------------------------------------------------------------------------------------------------------------------------------------------------------------------------------------------|----|-----------------------------------------------------------------------------------------------------------------------------------------------------------------------------------------------------------------------------------------------------------------------------------------------|-------------|-------------|-------------|--------------|----------|----------|
| GENEBODY | TCTEX1D1 | 1  | 67220432                                                                                                                                                                                                                                  | 1  | cg15026099                                                                                                                                                                                                                                                                                    | 0.906453055 | 0.846221372 | 0.717773918 | -0.188679137 | 2.77E-06 | 1.17E-05 |
| GENEBODY | TCTN3    | 10 | 97450247/97453245                                                                                                                                                                                                                         | 2  | cg16489809/cg16514724                                                                                                                                                                                                                                                                         | 0.613010395 | 0.496197678 | 0.404123823 | -0.208886572 | 5.04E-11 | 1.53E-09 |
| GENEBODY | TDGF1    | 3  | 46621556/46621936/46622647/46621686                                                                                                                                                                                                       | 4  | cg03679504/cg08058988/cg08962305/cg10031651                                                                                                                                                                                                                                                   | 0.621145469 | 0.479744318 | 0.404091389 | -0.21705408  | 2.26E-11 | 9.31E-10 |
| GENEBODY | TEX15    | 8  | 30691170                                                                                                                                                                                                                                  | 1  | cg26631437                                                                                                                                                                                                                                                                                    | 0.622866005 | 0.453492078 | 0.33232755  | -0.290538455 | 6.16E-12 | 4.14E-10 |
| GENEBODY | TFAP2B   | 6  | 50810432/50787361/50808813/50788414/50791385/50810993/50787964/50808627/50808667/50787803/50808699/50810715/50803820/50803945/50794722/50792868/50810852/50804174/50803903/50803850/50794057/50791419/50810682/50787650/50804147/50791202 | 26 | cg00908833/cg01610857/cg03159396/cg05928362/cg06117072/cg06564232/cg07103129/cg08178940/cg08857063/cg09247060/cg09363735/cg13223107/cg17083323/cg17343563/cg18442187/cg18886245/cg19620724/cg20432960/cg20894686/cg21317965/cg21650962/cg22248052/cg22282405/cg24366557/cg24641186/cg27260772 | 0.28033771  | 0.351626096 | 0.437550228 | 0.157212519  | 1.21E-07 | 7.39E-07 |
| GENEBODY | TFAP2D   | 6  | 50691286/50690647/50682710/50692762/50683682/50682485/50683782/50692495/50682340/50683213/50690975/50692252/50692371/50691003/50685098/50690590/50697940/50692150/50683593/50695479/50692605/50685247                                     | 22 | cg04573397/cg05139788/cg05255522/cg05650260/cg05798717/cg06804433/cg07625194/cg09086201/cg11038322/cg15412759/cg17191462/cg19384531/cg19509330/cg20180370/cg20229493/cg21760402/cg21871038/cg22235018/cg22286936/cg24094538/cg25049698/cg26680132                                             | 0.313749464 | 0.386309053 | 0.491498236 | 0.177748773  | 4.21E-09 | 4.36E-08 |
| GENEBODY | TFB2M    | 1  | 246728677/246728727/246728663/246717609                                                                                                                                                                                                   | 4  | cg12910806/cg14460735/cg17815049/cg24854957                                                                                                                                                                                                                                                   | 0.59837027  | 0.452601656 | 0.39025005  | -0.20812022  | 2.14E-10 | 4.25E-09 |

|          |        |    |                                                                                                                                                                                                                                                                      |    |                                                                                                                                                                                                                                                                                        |             |             |             |              |          |          |
|----------|--------|----|----------------------------------------------------------------------------------------------------------------------------------------------------------------------------------------------------------------------------------------------------------------------|----|----------------------------------------------------------------------------------------------------------------------------------------------------------------------------------------------------------------------------------------------------------------------------------------|-------------|-------------|-------------|--------------|----------|----------|
| GENEBODY | TFEC   | 7  | 115608801/115608<br>503/115586923/115 5<br>609683/115583891                                                                                                                                                                                                          | 5  | cg00927226/cg06493<br>963/cg09281714/cg1<br>1479380/ch.7.243542<br>7F                                                                                                                                                                                                                  | 0.50113184  | 0.409877429 | 0.339399885 | -0.161731955 | 5.17E-13 | 9.96E-11 |
| GENEBODY | TFF3   | 21 | 43734404                                                                                                                                                                                                                                                             | 1  | cg18217706                                                                                                                                                                                                                                                                             | 0.47127797  | 0.385965178 | 0.308512286 | -0.162765684 | 1.92E-10 | 3.91E-09 |
| GENEBODY | TFPI2  | 7  | 93519473/9351922<br>0/93519401/935198<br>55/93519621/93519<br>892                                                                                                                                                                                                    | 6  | cg12973591/cg18024<br>479/cg19784477/cg2<br>0230721/cg22799321<br>/cg23141855                                                                                                                                                                                                          | 0.200434836 | 0.348556788 | 0.571395334 | 0.370960498  | 1.50E-11 | 7.17E-10 |
| GENEBODY | THPO   | 3  | 184090630                                                                                                                                                                                                                                                            | 1  | cg06522515                                                                                                                                                                                                                                                                             | 0.73609909  | 0.615043039 | 0.471935314 | -0.264163776 | 1.17E-09 | 1.53E-08 |
| GENEBODY | TIMP4  | 3  | 12199836/1219763<br>0                                                                                                                                                                                                                                                | 2  | cg00314622/cg10110<br>335                                                                                                                                                                                                                                                              | 0.645457085 | 0.560144586 | 0.491313705 | -0.15414338  | 9.16E-08 | 5.84E-07 |
| GENEBODY | TLX1   | 10 | 102892528/102893<br>925/102896475/102<br>894227/102896546/<br>102896640/102894<br>441/102894342/102<br>894639/102892131/<br>102893980/102895 21<br>708/102895043/102<br>892787/102896102/<br>102892391/102895<br>133/102894120/102<br>894148/102891879/<br>102896376 | 21 | cg00299972/cg00741<br>609/cg01175020/cg0<br>4273871/cg04552206<br>/cg06382559/cg0741<br>6656/cg07915434/cg<br>08487063/cg1099941<br>3/cg12118269/cg144<br>61582/cg14861089/c<br>g15325875/cg205728<br>16/cg20615879/cg23<br>340017/cg24812837/<br>cg25266629/cg25856<br>018/cg27521476 | 0.281064455 | 0.315443011 | 0.463556207 | 0.182491751  | 4.27E-07 | 2.25E-06 |
| GENEBODY | TLX2   | 2  | 74742362/7474300<br>9/74742593/747432 5<br>43/74742786                                                                                                                                                                                                               | 5  | cg05856387/cg07203<br>423/cg07524679/cg1<br>6852704/cg19656282                                                                                                                                                                                                                         | 0.325807415 | 0.400196506 | 0.525307159 | 0.199499744  | 5.56E-08 | 3.78E-07 |
| GENEBODY | TM4SF4 | 3  | 149219783/149218<br>938/149212391                                                                                                                                                                                                                                    | 3  | cg08667024/cg12874<br>219/cg19422253                                                                                                                                                                                                                                                   | 0.647517357 | 0.594861565 | 0.478643503 | -0.168873854 | 7.53E-10 | 1.09E-08 |
| GENEBODY | TM7SF3 | 12 | 27156738/2716424<br>9/27166943                                                                                                                                                                                                                                       | 3  | cg12659065/cg14606<br>740/cg20673611                                                                                                                                                                                                                                                   | 0.847389915 | 0.74886085  | 0.692225227 | -0.155164688 | 1.04E-05 | 3.78E-05 |
| GENEBODY | TM7SF4 | 8  | 105365603                                                                                                                                                                                                                                                            | 1  | cg08179564                                                                                                                                                                                                                                                                             | 0.51516027  | 0.449533489 | 0.351291141 | -0.163869129 | 2.06E-08 | 1.63E-07 |
| GENEBODY | TMCO5A | 15 | 38233268                                                                                                                                                                                                                                                             | 1  | cg15286206                                                                                                                                                                                                                                                                             | 0.51195795  | 0.418156678 | 0.328500127 | -0.183457823 | 1.62E-08 | 1.34E-07 |

|          |           |    |                                                                                                                                       |    |                                                                                                                                                  |             |             |             |              |          |             |
|----------|-----------|----|---------------------------------------------------------------------------------------------------------------------------------------|----|--------------------------------------------------------------------------------------------------------------------------------------------------|-------------|-------------|-------------|--------------|----------|-------------|
| GENEBODY | TMEM108   | 3  | 133048306/133002<br>820/132977031/133<br>103339/133098492/<br>132990608/133094<br>221/133112774/133<br>097784/133020205/<br>133097868 | 11 | cg01058342/cg03187<br>125/cg03593595/cg0<br>4411342/cg06030846<br>/cg07594954/cg1266<br>8122/cg14668981/cg<br>15425937/cg2226498<br>0/cg25488160 | 0.629623759 | 0.530265585 | 0.437245313 | -0.192378446 | 2.18E-12 | 2.43E-10    |
| GENEBODY | TMEM155   | 4  | 122682720                                                                                                                             | 1  | cg04476764                                                                                                                                       | 0.56074794  | 0.422988156 | 0.310239673 | -0.250508267 | 6.44E-15 | 1.35E-11    |
| GENEBODY | TMEM184B  | 22 | 38635773/3863562<br>0                                                                                                                 | 2  | cg02100011/cg09984<br>479                                                                                                                        | 0.585733335 | 0.496625039 | 0.415886823 | -0.169846512 | 1.32E-05 | 4.68E-05    |
| GENEBODY | TMEM19    | 12 | 72083379/7208101<br>3                                                                                                                 | 2  | cg12552402/cg13016<br>773                                                                                                                        | 0.604241375 | 0.511371964 | 0.43964327  | -0.164598105 | 6.37E-05 | 0.000194153 |
| GENEBODY | TMEM39A   | 3  | 119180915                                                                                                                             | 1  | cg08844169                                                                                                                                       | 0.85753726  | 0.742626456 | 0.589412418 | -0.268124842 | 1.07E-08 | 9.34E-08    |
| GENEBODY | TMIGD1    | 17 | 28648320                                                                                                                              | 1  | cg10781870                                                                                                                                       | 0.586152865 | 0.509687589 | 0.415103605 | -0.17104926  | 3.66E-08 | 2.64E-07    |
| GENEBODY | TMPRSS11B | 4  | 69102304/6909367<br>5                                                                                                                 | 2  | cg03505857/cg09415<br>518                                                                                                                        | 0.52737457  | 0.435931333 | 0.355423232 | -0.171951338 | 2.69E-08 | 2.03E-07    |
| GENEBODY | TRAF5     | 1  | 211526705                                                                                                                             | 1  | cg13066703                                                                                                                                       | 0.33377811  | 0.192677654 | 0.147155244 | -0.186622866 | 7.37E-10 | 1.08E-08    |
| GENEBODY | TRAF6     | 11 | 36522143                                                                                                                              | 1  | cg01476222                                                                                                                                       | 0.45878218  | 0.365326367 | 0.279768232 | -0.179013948 | 5.15E-07 | 2.66E-06    |
| GENEBODY | TRAPPC2P1 | 19 | 57875238/5787498<br>8/57875014/578752<br>95                                                                                           | 4  | cg03007201/cg10066<br>151/cg12230795/cg2<br>1068576                                                                                              | 0.108855118 | 0.166959063 | 0.285722302 | 0.176867184  | 4.08E-05 | 0.000129949 |
| GENEBODY | TRAPPC5   | 19 | 7747220                                                                                                                               | 1  | cg24699296                                                                                                                                       | 0.639014495 | 0.751556344 | 0.833917505 | 0.19490301   | 8.67E-11 | 2.19E-09    |
| GENEBODY | TRAT1     | 3  | 108564871                                                                                                                             | 1  | cg22211507                                                                                                                                       | 0.485813815 | 0.354774622 | 0.321024891 | -0.164788924 | 6.21E-10 | 9.37E-09    |
| GENEBODY | TRDN      | 6  | 123738929/123839<br>720                                                                                                               | 2  | cg10768734/cg19143<br>211                                                                                                                        | 0.607604075 | 0.551520067 | 0.448415727 | -0.159188348 | 1.14E-05 | 4.10E-05    |
| GENEBODY | TRIM16    | 17 | 15554603                                                                                                                              | 1  | cg02109507                                                                                                                                       | 0.43498378  | 0.357418006 | 0.283251186 | -0.151732594 | 2.67E-10 | 4.99E-09    |
| GENEBODY | TRIM49    | 11 | 89535662                                                                                                                              | 1  | cg23102197                                                                                                                                       | 0.60187731  | 0.490549672 | 0.376923514 | -0.224953796 | 7.06E-11 | 1.89E-09    |
| GENEBODY | TRIM55    | 8  | 67085823/6704624<br>8/67050040/670478<br>51/67070006                                                                                  | 5  | cg04041976/cg21165<br>595/cg25483191/cg2<br>6104239/cg26700215                                                                                   | 0.570658019 | 0.470254794 | 0.407261335 | -0.163396684 | 2.41E-10 | 4.63E-09    |
| GENEBODY | TRIM77    | 11 | 89448414                                                                                                                              | 1  | cg15042801                                                                                                                                       | 0.58826783  | 0.453950444 | 0.300998227 | -0.287269603 | 7.77E-13 | 1.26E-10    |
| GENEBODY | TSGA10IP  | 11 | 65713893                                                                                                                              | 1  | cg21800989                                                                                                                                       | 0.693673805 | 0.633508528 | 0.47251895  | -0.221154855 | 1.77E-07 | 1.04E-06    |
| GENEBODY | TSPAN1    | 1  | 46649970/4664913<br>2                                                                                                                 | 2  | cg05371506/cg25369<br>262                                                                                                                        | 0.405575495 | 0.303571733 | 0.23783555  | -0.167739945 | 3.91E-12 | 3.21E-10    |

|          |        |    |                                                                                                                                                                                           |    |                                                                                                                                                                                                                                                                                                       |             |             |             |              |          |          |
|----------|--------|----|-------------------------------------------------------------------------------------------------------------------------------------------------------------------------------------------|----|-------------------------------------------------------------------------------------------------------------------------------------------------------------------------------------------------------------------------------------------------------------------------------------------------------|-------------|-------------|-------------|--------------|----------|----------|
| GENEBODY | TSPAN4 | 11 | 850952/855971/859<br>915/865673/856942<br>/860134/864739/85<br>1048/862750/85953<br>2/858840/862820/8<br>65988/864819/8598<br>73/865575/857071/<br>853761/857033/860<br>157/865749/859670 | 22 | cg00423364/cg03918<br>313/cg05608543/cg0<br>8057037/cg09631059<br>/cg13071185/cg1361<br>4606/cg13992402/cg<br>14139652/cg1427792<br>5/cg15164881/cg154<br>37031/cg16521773/c<br>g17998346/cg180287<br>67/cg20171011/cg20<br>676047/cg22101701/<br>cg22749642/cg23534<br>766/cg23938637/cg2<br>4134897 | 0.557909795 | 0.459182072 | 0.383165935 | -0.17474386  | 1.05E-12 | 1.51E-10 |
| GENEBODY | TSPO   | 22 | 43559044/4355609<br>5                                                                                                                                                                     | 2  | cg08391894/cg25672<br>027                                                                                                                                                                                                                                                                             | 0.54712027  | 0.437453144 | 0.358051059 | -0.189069211 | 2.41E-10 | 4.63E-09 |
| GENEBODY | TST    | 22 | 37414044/3741217<br>3/37414747/374144<br>42                                                                                                                                               | 4  | cg01419582/cg01553<br>653/cg08727202/cg1<br>7575915                                                                                                                                                                                                                                                   | 0.740009713 | 0.568721289 | 0.472251452 | -0.26775826  | 1.50E-10 | 3.28E-09 |
| GENEBODY | TXNDC3 | 7  | 37923971/3789904<br>5/37924598                                                                                                                                                            | 3  | cg05088704/cg10576<br>132/cg27518977                                                                                                                                                                                                                                                                  | 0.645847325 | 0.581371104 | 0.473627329 | -0.172219996 | 8.84E-10 | 1.23E-08 |
| GENEBODY | TYR    | 11 | 88953771                                                                                                                                                                                  | 1  | cg02618229                                                                                                                                                                                                                                                                                            | 0.752075505 | 0.647699306 | 0.519959636 | -0.232115869 | 2.95E-08 | 2.21E-07 |
| GENEBODY | UGT2A1 | 4  | 70504750                                                                                                                                                                                  | 1  | cg02219607                                                                                                                                                                                                                                                                                            | 0.854529735 | 0.804295483 | 0.638369209 | -0.216160526 | 9.11E-06 | 3.37E-05 |
| GENEBODY | ULBP1  | 6  | 150286838/150286<br>157/150286646/150<br>285333/150286508/<br>150289488/150286<br>212/150285634/150<br>285815/150285475                                                                   | 10 | cg00126498/cg01763<br>051/cg01981252/cg0<br>4697775/cg11660826<br>/cg12489846/cg1293<br>6335/cg14022137/cg<br>16635480/cg2511599<br>3                                                                                                                                                                 | 0.244821174 | 0.314165703 | 0.414899613 | 0.170078439  | 7.84E-08 | 5.09E-07 |
| GENEBODY | UNC13C | 15 | 54638342/5458244<br>5/54897418                                                                                                                                                            | 3  | cg00517270/cg22825<br>220/cg27553971                                                                                                                                                                                                                                                                  | 0.662577968 | 0.60218997  | 0.500774273 | -0.161803696 | 2.17E-07 | 1.24E-06 |
| GENEBODY | UNCX   | 7  | 1275483/1273835/1<br>274752/1273200/12<br>75630/1274166/127<br>3394/1274142/1275<br>258/1275252                                                                                           | 10 | cg01072217/cg02434<br>035/cg03970319/cg0<br>6636427/cg09917979<br>/cg11461298/cg1465<br>8067/cg16000637/cg<br>23358612/cg2352870<br>5                                                                                                                                                                 | 0.379121901 | 0.430315663 | 0.555353414 | 0.176231513  | 7.70E-08 | 5.01E-07 |

|          |          |    |                                                                                                                                                                                                                    |    |                                                                                                                                                                                                                                                              |             |             |             |              |          |          |
|----------|----------|----|--------------------------------------------------------------------------------------------------------------------------------------------------------------------------------------------------------------------|----|--------------------------------------------------------------------------------------------------------------------------------------------------------------------------------------------------------------------------------------------------------------|-------------|-------------|-------------|--------------|----------|----------|
| GENEBODY | USP29    | 19 | 57641963/5764214<br>3/57641846                                                                                                                                                                                     | 3  | cg16594007/cg22338<br>152/cg26587228                                                                                                                                                                                                                         | 0.741866498 | 0.689605689 | 0.578578098 | -0.1632884   | 1.82E-05 | 6.27E-05 |
| GENEBODY | UTF1     | 10 | 135044856/135044<br>789                                                                                                                                                                                            | 2  | cg00646347/cg11464<br>895                                                                                                                                                                                                                                    | 0.462928785 | 0.512684333 | 0.630203091 | 0.167274306  | 2.73E-08 | 2.06E-07 |
| GENEBODY | VCAM1    | 1  | 101188910/101186<br>048                                                                                                                                                                                            | 2  | cg24593324/cg27544<br>046                                                                                                                                                                                                                                    | 0.663223658 | 0.58657275  | 0.50240025  | -0.160823408 | 1.00E-07 | 6.30E-07 |
| GENEBODY | VMO1     | 17 | 4688683/4689284/4<br>689165                                                                                                                                                                                        | 3  | cg06419850/cg09380<br>695/cg26605335                                                                                                                                                                                                                         | 0.471277785 | 0.5127324   | 0.656981086 | 0.185703301  | 4.27E-09 | 4.41E-08 |
| GENEBODY | VNN2     | 6  | 133077819/133078<br>831                                                                                                                                                                                            | 2  | cg19594626/cg25490<br>477                                                                                                                                                                                                                                    | 0.618853865 | 0.5213141   | 0.443340423 | -0.175513442 | 6.62E-08 | 4.39E-07 |
| GENEBODY | VSTM2B   | 19 | 30020162/3001936<br>9/30018436/300187<br>33/30020728/30020<br>886/30021276/3002<br>4706/30019647/300<br>17829/30019102/30<br>019898/30022536/3<br>0019529                                                          | 14 | cg04756279/cg05984<br>554/cg07955752/cg0<br>9064682/cg10743390<br>/cg10836101/cg1277<br>6966/cg18375236/cg<br>18716164/cg1877711<br>9/cg20695433/cg221<br>43289/cg25690537/c<br>g27058257                                                                    | 0.276356522 | 0.331611169 | 0.458490047 | 0.182133525  | 2.45E-08 | 1.88E-07 |
| GENEBODY | VTRNA1-2 | 5  | 140098576                                                                                                                                                                                                          | 1  | cg15697852                                                                                                                                                                                                                                                   | 0.479840455 | 0.3511258   | 0.253039441 | -0.226801014 | 1.45E-11 | 7.03E-10 |
| GENEBODY | WDR49    | 3  | 167320581/167238<br>645/167293056/167<br>293354/167293814                                                                                                                                                          | 5  | cg03545548/cg04903<br>759/cg14643415/cg1<br>7178922/cg18142906                                                                                                                                                                                               | 0.622484424 | 0.535076164 | 0.455586806 | -0.166897618 | 8.13E-13 | 1.29E-10 |
| GENEBODY | WFDC10A  | 20 | 44259589                                                                                                                                                                                                           | 1  | cg24337225                                                                                                                                                                                                                                                   | 0.78751006  | 0.707709244 | 0.631765427 | -0.155744633 | 5.82E-06 | 2.26E-05 |
| GENEBODY | WIT1     | 11 | 32459954/3245942<br>8/32460980/324612<br>40/32459626/32460<br>375/32457878/3246<br>0656/32458769/324<br>58656/32459057/32<br>458714/32457727/3<br>2458966/32461212/<br>32459760/3245738<br>6/32460799/324605<br>87 | 19 | cg03052301/cg04131<br>898/cg05022105/cg0<br>6845853/cg07281879<br>/cg09711746/cg1260<br>0018/cg12766736/cg<br>14891410/cg1629456<br>6/cg16325378/cg197<br>18882/cg22975913/c<br>g24286165/cg252472<br>90/cg25577842/cg26<br>232818/cg27234067/<br>cg27259320 | 0.283698073 | 0.356986224 | 0.47859278  | 0.194894707  | 5.24E-07 | 2.70E-06 |
| GENEBODY | YPEL4    | 11 | 57414457/5741455<br>7/57414401                                                                                                                                                                                     | 3  | cg10366093/cg15363<br>887/cg27368025                                                                                                                                                                                                                         | 0.287362392 | 0.362775524 | 0.471969573 | 0.184607181  | 8.94E-06 | 3.32E-05 |
| GENEBODY | ZFP28    | 19 | 57050834/5705062<br>0/57052834                                                                                                                                                                                     | 3  | cg04783231/cg05292<br>954/cg21727463                                                                                                                                                                                                                         | 0.310785263 | 0.434447739 | 0.55731685  | 0.246531588  | 1.67E-08 | 1.37E-07 |

|          |       |    |                                                                                                                                                               |    |                                                                                                                                                                            |             |             |             |              |          |             |
|----------|-------|----|---------------------------------------------------------------------------------------------------------------------------------------------------------------|----|----------------------------------------------------------------------------------------------------------------------------------------------------------------------------|-------------|-------------|-------------|--------------|----------|-------------|
| GENEBODY | ZFP30 | 19 | 38129121                                                                                                                                                      | 1  | cg23355546                                                                                                                                                                 | 0.57848398  | 0.493870322 | 0.3960417   | -0.18244228  | 3.25E-09 | 3.54E-08    |
| GENEBODY | ZFP82 | 19 | 36891345                                                                                                                                                      | 1  | cg07673241                                                                                                                                                                 | 0.883843225 | 0.790912917 | 0.678376136 | -0.205467089 | 3.67E-05 | 0.000118149 |
| GENEBODY | ZG16  | 16 | 29790933                                                                                                                                                      | 1  | cg04125273                                                                                                                                                                 | 0.681148105 | 0.558352922 | 0.455213409 | -0.225934696 | 1.92E-12 | 2.18E-10    |
| GENEBODY | ZIC1  | 3  | 147129278/147129<br>826/147129184/147<br>131069/147128998/<br>147131178/147130<br>477/147131146/147<br>129778/147131332/<br>147130536/147129<br>213/147129952 | 13 | cg00842299/cg01376<br>826/cg05095591/cg0<br>5716671/cg06306198<br>/cg12204258/cg1475<br>0948/cg16209664/cg<br>17482033/cg1829743<br>7/cg19029181/cg234<br>48486/cg25590492 | 0.336063238 | 0.401763437 | 0.563720743 | 0.227657505  | 3.00E-08 | 2.23E-07    |

|          |         |    |                   |    |                    |             |             |             |              |          |          |
|----------|---------|----|-------------------|----|--------------------|-------------|-------------|-------------|--------------|----------|----------|
|          |         |    | 147114406/147111  |    | cg00028935/cg00154 |             |             |             |              |          |          |
|          |         |    | 280/147110322/147 |    | 357/cg00235367/cg0 |             |             |             |              |          |          |
|          |         |    | 106010/147116807/ |    | 0334063/cg00896370 |             |             |             |              |          |          |
|          |         |    | 147107349/147110  |    | /cg01137401/cg0158 |             |             |             |              |          |          |
|          |         |    | 595/147112438/147 |    | 1018/cg02126051/cg |             |             |             |              |          |          |
|          |         |    | 113092/147112081/ |    | 02390329/cg0265355 |             |             |             |              |          |          |
|          |         |    | 147116135/147115  |    | 9/cg03388789/cg036 |             |             |             |              |          |          |
|          |         |    | 506/147111135/147 |    | 31131/cg03881775/c |             |             |             |              |          |          |
|          |         |    | 111660/147106635/ |    | g03900143/cg040793 |             |             |             |              |          |          |
|          |         |    | 147106561/147112  |    | 01/cg04556126/cg04 |             |             |             |              |          |          |
|          |         |    | 605/147113700/147 |    | 557018/cg05855917/ |             |             |             |              |          |          |
|          |         |    | 115930/147122664/ |    | cg06070263/cg06166 |             |             |             |              |          |          |
|          |         |    | 147105190/147110  |    | 523/cg07406191/cg0 |             |             |             |              |          |          |
|          |         |    | 378/147115043/147 |    | 7850418/cg08013557 |             |             |             |              |          |          |
|          |         |    | 114986/147109426/ |    | /cg08091192/cg0839 |             |             |             |              |          |          |
|          |         |    | 147110367/147106  |    | 3041/cg08812189/cg |             |             |             |              |          |          |
|          |         |    | 489/147107109/147 |    | 08889797/cg1113904 |             |             |             |              |          |          |
| GENEBODY | ZIC4    | 3  | 110499/147113918/ | 57 | 4/cg12388007/cg128 | 0.358865792 | 0.411439705 | 0.510092814 | 0.151227022  | 7.56E-09 | 6.99E-08 |
|          |         |    | 147105899/147110  |    | 92506/cg12976081/c |             |             |             |              |          |          |
|          |         |    | 667/147120248/147 |    | g13340636/cg138971 |             |             |             |              |          |          |
|          |         |    | 108916/147121229/ |    | 34/cg15105326/cg15 |             |             |             |              |          |          |
|          |         |    | 147106890/147108  |    | 287443/cg16240162/ |             |             |             |              |          |          |
|          |         |    | 843/147111308/147 |    | cg16768018/cg17003 |             |             |             |              |          |          |
|          |         |    | 109490/147113726/ |    | 736/cg17569743/cg1 |             |             |             |              |          |          |
|          |         |    | 147112541/147114  |    | 8082337/cg18292434 |             |             |             |              |          |          |
|          |         |    | 352/147109629/147 |    | /cg18731327/cg1893 |             |             |             |              |          |          |
|          |         |    | 109784/147123123/ |    | 0354/cg20939084/cg |             |             |             |              |          |          |
|          |         |    | 147112316/147106  |    | 21639713/cg2220377 |             |             |             |              |          |          |
|          |         |    | 208/147110295/147 |    | 6/cg22614239/cg227 |             |             |             |              |          |          |
|          |         |    | 121892/147107900/ |    | 96509/cg23957311/c |             |             |             |              |          |          |
|          |         |    | 147112143/147116  |    | g23980740/cg250072 |             |             |             |              |          |          |
|          |         |    | 420/147112096/147 |    | 83/cg25449440/cg26 |             |             |             |              |          |          |
|          |         |    | 122315/147108512/ |    | 014036/cg26224785/ |             |             |             |              |          |          |
|          |         |    | 147110229/147111  |    | cg26790247/cg27416 |             |             |             |              |          |          |
|          |         |    | 120               |    | 372/cg27606499     |             |             |             |              |          |          |
| GENEBODY | ZIK1    | 19 | 58096559/5809651  | 3  | cg06412288/cg13617 | 0.752243033 | 0.637577424 | 0.520320808 | -0.231922226 | 2.47E-12 | 2.58E-10 |
|          |         |    | 2/58099109        |    | 753/cg22836912     |             |             |             |              |          |          |
| GENEBODY | ZKSCAN2 | 16 | 25266553          | 1  | cg09588492         | 0.61983746  | 0.523827922 | 0.465177723 | -0.154659737 | 5.51E-09 | 5.45E-08 |



|          |         |    |                                                                                                                                     |    |                                                                                                                                                                 |             |             |             |              |             |             |
|----------|---------|----|-------------------------------------------------------------------------------------------------------------------------------------|----|-----------------------------------------------------------------------------------------------------------------------------------------------------------------|-------------|-------------|-------------|--------------|-------------|-------------|
| GENEBODY | ZMAT4   | 8  | 40432238/4060236<br>3/40618425/405520<br>37/40543522/40627<br>109/40478698/4061<br>3848/40616749/403<br>92927/40625224/40<br>443548 | 12 | cg00935717/cg02458<br>516/cg04364695/cg0<br>6454283/cg10260711<br>/cg11491870/cg1482<br>2721/cg20071227/cg<br>20630363/cg2109304<br>3/cg24882673/cg248<br>87387 | 0.657354035 | 0.59878775  | 0.501365575 | -0.155988461 | 6.73E-11    | 1.84E-09    |
| GENEBODY | ZNF114  | 19 | 48785784                                                                                                                            | 1  | cg00843019                                                                                                                                                      | 0.790551345 | 0.705236406 | 0.620201568 | -0.170349777 | 5.28E-05    | 0.000163798 |
| GENEBODY | ZNF154  | 19 | 58220080/5822029<br>5                                                                                                               | 2  | cg03142586/cg11294<br>513                                                                                                                                       | 0.483641065 | 0.614256869 | 0.703068255 | 0.21942719   | 9.86E-10    | 1.34E-08    |
| GENEBODY | ZNF254  | 19 | 24270468                                                                                                                            | 1  | cg01000657                                                                                                                                                      | 0.070355748 | 0.104261602 | 0.280390649 | 0.210034901  | 0.000911951 | 0.002165104 |
| GENEBODY | ZNF257  | 19 | 22235850/2223545<br>4/22235551                                                                                                      | 3  | cg06394874/cg06852<br>575/cg11619707                                                                                                                            | 0.382096038 | 0.498389683 | 0.63197652  | 0.249880483  | 6.72E-12    | 4.35E-10    |
| GENEBODY | ZNF304  | 19 | 57863210/5786703<br>2                                                                                                               | 2  | cg04546041/cg24788<br>771                                                                                                                                       | 0.8722886   | 0.796608822 | 0.650300227 | -0.221988373 | 6.61E-06    | 2.54E-05    |
| GENEBODY | ZNF334  | 20 | 45138738                                                                                                                            | 1  | cg23845310                                                                                                                                                      | 0.733046855 | 0.652532778 | 0.5730647   | -0.159982155 | 1.01E-05    | 3.68E-05    |
| GENEBODY | ZNF43   | 19 | 22014817/2201860<br>5/22018746/220187<br>91/22018538                                                                                | 5  | cg00749323/cg02612<br>618/cg14252602/cg2<br>4324871/cg24886770                                                                                                  | 0.362986525 | 0.399688613 | 0.51600423  | 0.153017705  | 4.77E-05    | 0.00014966  |
| GENEBODY | ZNF454  | 5  | 178371587/178381<br>935                                                                                                             | 2  | cg05461386/cg18358<br>845                                                                                                                                       | 0.720645005 | 0.645089992 | 0.495048748 | -0.225596257 | 2.10E-08    | 1.66E-07    |
| GENEBODY | ZNF483  | 9  | 114290738                                                                                                                           | 1  | cg13813533                                                                                                                                                      | 0.76082225  | 0.634520494 | 0.525915109 | -0.234907141 | 9.79E-10    | 1.33E-08    |
| GENEBODY | ZNF507  | 19 | 32865061                                                                                                                            | 1  | cg04771109                                                                                                                                                      | 0.5156129   | 0.4185368   | 0.331010732 | -0.184602168 | 4.06E-08    | 2.88E-07    |
| GENEBODY | ZNF518B | 4  | 10447440                                                                                                                            | 1  | cg11578055                                                                                                                                                      | 0.86757463  | 0.808147272 | 0.613450536 | -0.254124094 | 6.18E-05    | 0.000188834 |
| GENEBODY | ZNF529  | 19 | 37095681/3706138<br>3/37096010/370465<br>82/37095466/37096<br>148/37095757                                                          | 7  | cg09430118/cg10172<br>250/cg19406736/cg2<br>1486913/cg24871714<br>/cg25397945/cg2765<br>8967                                                                    | 0.443580931 | 0.534415318 | 0.63017785  | 0.186596919  | 4.42E-09    | 4.52E-08    |
| GENEBODY | ZNF530  | 19 | 58111705/5811573<br>2/58111647/581117<br>67/58111769                                                                                | 5  | cg03734784/cg09767<br>616/cg12476763/cg1<br>3203804/cg24192482                                                                                                  | 0.230644361 | 0.317485943 | 0.415001635 | 0.184357274  | 4.25E-05    | 0.000134967 |
| GENEBODY | ZNF542  | 19 | 56879662/5688235<br>5/56879933/568795<br>54/56880388/56879<br>559/56879994/5687<br>9571/56879613/568<br>79645                       | 10 | cg03146949/cg07928<br>808/cg08697092/cg1<br>5708153/cg18471660<br>/cg18787401/cg2000<br>4406/cg26309134/cg<br>27062795/cg2747737<br>3                           | 0.351600762 | 0.463379549 | 0.613233508 | 0.261632746  | 5.73E-10    | 8.84E-09    |

|          |         |    |                                                                                                                                     |    |                                                                                                                                                                 |             |             |             |              |             |             |
|----------|---------|----|-------------------------------------------------------------------------------------------------------------------------------------|----|-----------------------------------------------------------------------------------------------------------------------------------------------------------------|-------------|-------------|-------------|--------------|-------------|-------------|
| GENEBODY | ZNF549  | 19 | 58039253/5804313<br>1/58039073                                                                                                      | 3  | cg06616879/cg14592<br>770/cg17684296                                                                                                                            | 0.380423141 | 0.434851281 | 0.541282609 | 0.160859469  | 1.18E-07    | 7.28E-07    |
| GENEBODY | ZNF563  | 19 | 12440923/1244427<br>3                                                                                                               | 2  | cg13402083/cg25682<br>920                                                                                                                                       | 0.752709545 | 0.572152017 | 0.47094505  | -0.281764495 | 4.55E-13    | 9.40E-11    |
| GENEBODY | ZNF586  | 19 | 58281450/5828179<br>7                                                                                                               | 2  | cg14038484/cg16666<br>206                                                                                                                                       | 0.474815677 | 0.513182135 | 0.629203648 | 0.154387971  | 0.001137177 | 0.002654076 |
| GENEBODY | ZNF626  | 19 | 20844070                                                                                                                            | 1  | cg16510409                                                                                                                                                      | 0.334466715 | 0.437191611 | 0.527248464 | 0.192781749  | 7.07E-10    | 1.04E-08    |
| GENEBODY | ZNF671  | 19 | 58238600/5823516<br>7/58238435                                                                                                      | 3  | cg03215105/cg07990<br>873/cg26705688                                                                                                                            | 0.490944233 | 0.549336074 | 0.642837827 | 0.151893595  | 5.36E-07    | 2.76E-06    |
| GENEBODY | ZNF705A | 12 | 8329330                                                                                                                             | 1  | cg17479811                                                                                                                                                      | 0.692960605 | 0.636332856 | 0.535742814 | -0.157217791 | 3.93E-08    | 2.81E-07    |
| GENEBODY | ZNF732  | 4  | 265139                                                                                                                              | 1  | cg14446430                                                                                                                                                      | 0.655922295 | 0.562328983 | 0.470016641 | -0.185905654 | 4.66E-09    | 4.72E-08    |
| GENEBODY | ZNF772  | 19 | 57988497                                                                                                                            | 1  | cg01017773                                                                                                                                                      | 0.222995235 | 0.316335106 | 0.408892923 | 0.185897688  | 4.37E-05    | 0.000138392 |
| GENEBODY | ZNF788  | 19 | 12203315/1220364<br>4/12203198/122033<br>49/12207214                                                                                | 5  | cg01172903/cg01404<br>753/cg06384763/cg1<br>1767984/cg21289365                                                                                                  | 0.136134971 | 0.255735171 | 0.50351314  | 0.367378168  | 1.34E-07    | 8.10E-07    |
| GENEBODY | ZNF793  | 19 | 38022450                                                                                                                            | 1  | cg16254093                                                                                                                                                      | 0.85850379  | 0.79038605  | 0.676168068 | -0.182335722 | 7.16E-06    | 2.72E-05    |
| GENEBODY | ZNF804B | 7  | 88425077/8858388<br>4/88423665/884250<br>85/88594866/88858<br>347/88425139/8842<br>5122/88425758/884<br>24985/88425148/88<br>426025 | 12 | cg00729133/cg03108<br>373/cg03183800/cg0<br>5079191/cg06820822<br>/cg09795550/cg1335<br>4414/cg15325154/cg<br>16781484/cg1968278<br>6/cg22946147/cg249<br>75898 | 0.765890464 | 0.685058978 | 0.584061893 | -0.181828571 | 3.66E-11    | 1.25E-09    |
| GENEBODY | ZNF814  | 19 | 58400095/5839986<br>5/58397811/583999<br>67                                                                                         | 4  | cg02280912/cg22299<br>467/cg22481158/cg2<br>2510337                                                                                                             | 0.485496321 | 0.560678227 | 0.663601421 | 0.1781051    | 3.88E-07    | 2.07E-06    |
| GENEBODY | ZNF85   | 19 | 21106370                                                                                                                            | 1  | cg11416076                                                                                                                                                      | 0.152357116 | 0.290752656 | 0.445527541 | 0.293170425  | 1.32E-06    | 6.09E-06    |
| GENEBODY | ZNF876P | 4  | 207357/209682/206<br>874/206877/206562<br>/206442                                                                                   | 6  | cg07043305/cg10113<br>414/cg11836119/cg1<br>2547166/cg17201760<br>/cg20296343                                                                                   | 0.476610028 | 0.566519825 | 0.665695598 | 0.18908557   | 1.81E-11    | 8.03E-10    |
| GENEBODY | ZP4     | 1  | 238051451/238049<br>504                                                                                                             | 2  | cg17514199/cg27168<br>737                                                                                                                                       | 0.66278006  | 0.595976408 | 0.512301293 | -0.150478767 | 6.14E-08    | 4.12E-07    |
| GENEBODY | ZPBP2   | 17 | 38028394                                                                                                                            | 1  | cg11212589                                                                                                                                                      | 0.700927985 | 0.582755744 | 0.504632686 | -0.196295299 | 1.10E-07    | 6.85E-07    |
| GENEBODY | ZPLD1   | 3  | 102154087/102156<br>072/102187934                                                                                                   | 3  | cg00423655/cg04357<br>717/cg08483570                                                                                                                            | 0.694401172 | 0.580483544 | 0.473339185 | -0.221061987 | 4.39E-08    | 3.07E-07    |
| GENEBODY | ZSCAN23 | 6  | 28403086                                                                                                                            | 1  | cg20803211                                                                                                                                                      | 0.499996225 | 0.430526039 | 0.297437109 | -0.202559116 | 9.79E-09    | 8.74E-08    |
| UTR3     | A2ML1   | 12 | 9028945                                                                                                                             | 1  | cg11756734                                                                                                                                                      | 0.638961415 | 0.601603228 | 0.486107759 | -0.152853656 | 3.03E-07    | 2.28E-06    |

|      |          |    |                                           |   |                                                                   |             |             |             |              |             |             |
|------|----------|----|-------------------------------------------|---|-------------------------------------------------------------------|-------------|-------------|-------------|--------------|-------------|-------------|
| UTR3 | ABCA12   | 2  | 215796436                                 | 1 | cg04530015                                                        | 0.57522704  | 0.427715561 | 0.311875464 | -0.263351576 | 2.24E-13    | 5.46E-11    |
| UTR3 | ABCA4    | 1  | 94458645                                  | 1 | cg18377941                                                        | 0.687904555 | 0.576694828 | 0.489844095 | -0.19806046  | 4.15E-05    | 0.000178105 |
| UTR3 | ABCG4    | 11 | 119032584                                 | 1 | cg06622994                                                        | 0.586185735 | 0.50533435  | 0.390541432 | -0.195644303 | 3.15E-09    | 4.46E-08    |
| UTR3 | ABI3     | 17 | 47300216                                  | 1 | cg14009013                                                        | 0.761204525 | 0.676664889 | 0.581799882 | -0.179404643 | 9.32E-07    | 6.05E-06    |
| UTR3 | ABLIM3   | 5  | 148638033                                 | 1 | cg02306139                                                        | 0.614524665 | 0.5010142   | 0.329975855 | -0.28454881  | 8.83E-12    | 5.41E-10    |
| UTR3 | ACAN     | 15 | 89418456                                  | 1 | cg08631783                                                        | 0.67395309  | 0.566345628 | 0.483523068 | -0.190430022 | 3.50E-07    | 2.58E-06    |
| UTR3 | ACER3    | 11 | 76733236/76731589                         | 2 | cg05476094/cg27121309                                             | 0.724103983 | 0.618855539 | 0.518345402 | -0.20575858  | 3.58E-10    | 7.42E-09    |
| UTR3 | ADAM29   | 4  | 175899203                                 | 1 | cg09975995                                                        | 0.63443501  | 0.512790856 | 0.390626277 | -0.243808733 | 4.09E-09    | 5.57E-08    |
| UTR3 | ADAMTS18 | 16 | 77317555                                  | 1 | cg02084561                                                        | 0.76230827  | 0.686389017 | 0.596039695 | -0.166268575 | 1.10E-06    | 7.03E-06    |
| UTR3 | ADAMTS9  | 3  | 64504415                                  | 1 | cg02810826                                                        | 0.781008645 | 0.633513989 | 0.503249659 | -0.277758986 | 6.61E-09    | 8.40E-08    |
| UTR3 | ADAMTSL3 | 15 | 84706833                                  | 1 | cg08115297                                                        | 0.672769115 | 0.53539575  | 0.326736905 | -0.34603221  | 8.91E-13    | 1.17E-10    |
| UTR3 | ADD2     | 2  | 70903803/70889324                         | 2 | cg13284981/cg15016734                                             | 0.7276324   | 0.6447923   | 0.568877045 | -0.158755355 | 6.99E-07    | 4.70E-06    |
| UTR3 | ADM2     | 22 | 50923890/50924745/50923963                | 3 | cg13332571/cg19621271/cg23513727                                  | 0.744776612 | 0.648096317 | 0.562427082 | -0.18234953  | 2.48E-10    | 5.48E-09    |
| UTR3 | ADORA2A  | 22 | 24838292                                  | 1 | cg12727256                                                        | 0.72455102  | 0.651873172 | 0.567412368 | -0.157138652 | 2.52E-06    | 1.48E-05    |
| UTR3 | ADRA1B   | 5  | 159399506/159399681                       | 2 | cg03825010/cg14614811                                             | 0.166410423 | 0.231322961 | 0.346068013 | 0.179657589  | 0.000194931 | 0.000706806 |
| UTR3 | ADRB2    | 5  | 148208041                                 | 1 | cg08370787                                                        | 0.528259235 | 0.410485839 | 0.342388755 | -0.18587048  | 1.06E-10    | 2.86E-09    |
| UTR3 | AFF4     | 5  | 132213462                                 | 1 | cg06703856                                                        | 0.51727074  | 0.439348106 | 0.348019764 | -0.169250976 | 6.49E-10    | 1.18E-08    |
| UTR3 | AGBL3    | 7  | 134820312                                 | 1 | cg18461626                                                        | 0.82932953  | 0.727430106 | 0.644508309 | -0.184821221 | 4.20E-05    | 0.000179852 |
| UTR3 | AGBL4    | 1  | 48998823                                  | 1 | cg02057755                                                        | 0.380710425 | 0.277773267 | 0.190820573 | -0.189889852 | 3.76E-14    | 1.42E-11    |
| UTR3 | AGXT2    | 5  | 34998412                                  | 1 | cg15664442                                                        | 0.80849205  | 0.753906983 | 0.654287523 | -0.154204527 | 3.02E-06    | 1.73E-05    |
| UTR3 | AGXT2L1  | 4  | 109663613                                 | 1 | cg19486412                                                        | 0.82405332  | 0.743231594 | 0.612550055 | -0.211503265 | 1.03E-06    | 6.59E-06    |
| UTR3 | AHRR     | 5  | 435040/435388/435267/435613/434998/436816 | 6 | cg14448919/cg14807090/cg16336872/cg21972741/cg22951524/cg26954197 | 0.623819285 | 0.550968883 | 0.471547414 | -0.152271871 | 3.62E-06    | 2.02E-05    |
| UTR3 | AHSA1    | 14 | 77935699                                  | 1 | cg14520941                                                        | 0.613637915 | 0.511734744 | 0.428135505 | -0.18550241  | 2.40E-11    | 1.05E-09    |
| UTR3 | AIFM3    | 22 | 21335632                                  | 1 | cg25976804                                                        | 0.62246171  | 0.506076589 | 0.445157382 | -0.177304328 | 8.30E-08    | 7.39E-07    |
| UTR3 | AIPL1    | 17 | 6327601                                   | 1 | cg17609294                                                        | 0.763865555 | 0.646603222 | 0.514447655 | -0.2494179   | 6.71E-08    | 6.13E-07    |
| UTR3 | AKAP11   | 13 | 42894507                                  | 1 | cg03439687                                                        | 0.612276475 | 0.5021941   | 0.414127118 | -0.198149357 | 8.42E-13    | 1.13E-10    |
| UTR3 | AKAP5    | 14 | 64936525                                  | 1 | cg05919314                                                        | 0.750572145 | 0.637316439 | 0.555641536 | -0.194930609 | 9.99E-08    | 8.66E-07    |
| UTR3 | AKAP6    | 14 | 33296030                                  | 1 | cg15924738                                                        | 0.59473448  | 0.531065528 | 0.413856027 | -0.180878453 | 1.95E-09    | 2.98E-08    |
| UTR3 | AKAP7    | 6  | 131602870                                 | 1 | cg00665374                                                        | 0.51366372  | 0.609084361 | 0.693270741 | 0.179607021  | 1.18E-09    | 1.94E-08    |
| UTR3 | ALAD     | 9  | 116150138                                 | 1 | cg14193097                                                        | 0.5411247   | 0.424798272 | 0.340056877 | -0.201067823 | 8.43E-11    | 2.47E-09    |
| UTR3 | ALB      | 4  | 74286665                                  | 1 | cg08368094                                                        | 0.778720585 | 0.666397389 | 0.518812423 | -0.259908162 | 1.47E-08    | 1.66E-07    |

|      |          |    |                                                                |   |                                                                              |             |             |             |              |          |            |
|------|----------|----|----------------------------------------------------------------|---|------------------------------------------------------------------------------|-------------|-------------|-------------|--------------|----------|------------|
| UTR3 | ALDH1L2  | 12 | 105414154                                                      | 1 | cg14255981                                                                   | 0.672790595 | 0.528602033 | 0.444274377 | -0.228516218 | 3.59E-09 | 4.97E-08   |
| UTR3 | ALG9     | 11 | 111653746                                                      | 1 | cg11259591                                                                   | 0.72719932  | 0.634226522 | 0.505274709 | -0.221924611 | 1.07E-10 | 2.88E-09   |
| UTR3 | ALOXE3   | 17 | 7999745                                                        | 1 | cg05365385                                                                   | 0.55536219  | 0.453467494 | 0.403523736 | -0.151838454 | 2.22E-09 | 3.31E-08   |
| UTR3 | ALPPL2   | 2  | 233274653/233274723                                            | 2 | cg16700265/cg24331934                                                        | 0.5487432   | 0.464692861 | 0.386979732 | -0.161763468 | 4.05E-11 | 1.55E-09   |
| UTR3 | AMH      | 19 | 2252069/2252029                                                | 2 | cg00299047/cg12534008                                                        | 0.44810855  | 0.499917708 | 0.611727516 | 0.163618966  | 3.58E-05 | 0.00015613 |
| UTR3 | AMPH     | 7  | 38423649                                                       | 1 | cg15777769                                                                   | 0.6787354   | 0.559163772 | 0.423217873 | -0.255517527 | 4.80E-11 | 1.76E-09   |
| UTR3 | ANK3     | 10 | 61802440                                                       | 1 | cg15627145                                                                   | 0.621806035 | 0.482421689 | 0.3703146   | -0.251491435 | 4.16E-12 | 3.37E-10   |
| UTR3 | ANKMY2   | 7  | 16639517                                                       | 1 | cg10276016                                                                   | 0.50242528  | 0.410169906 | 0.298834709 | -0.203590571 | 1.18E-11 | 6.50E-10   |
| UTR3 | ANKRD13A | 12 | 110476821                                                      | 1 | cg13509421                                                                   | 0.448228205 | 0.359702839 | 0.274879641 | -0.173348564 | 5.08E-10 | 9.59E-09   |
| UTR3 | ANKRD33B | 5  | 10655518/10655569/10652296/10650351/10653304/10655725/10651897 | 7 | cg01089425/cg04645676/cg05162281/cg06926314/cg10581071/cg11707556/cg23325245 | 0.750370347 | 0.64393118  | 0.543394964 | -0.206912383 | 9.92E-10 | 1.68E-08   |
| UTR3 | ANKRD35  | 1  | 145568368                                                      | 1 | cg26537883                                                                   | 0.760453825 | 0.619142517 | 0.493559041 | -0.266894784 | 4.32E-09 | 5.83E-08   |
| UTR3 | ANKRD46  | 8  | 101534515                                                      | 1 | cg11163330                                                                   | 0.831350875 | 0.712009756 | 0.643841623 | -0.187509252 | 9.37E-11 | 2.65E-09   |
| UTR3 | ANKRD55  | 5  | 55395877                                                       | 1 | cg17577695                                                                   | 0.681304495 | 0.644753494 | 0.517329018 | -0.163975477 | 8.39E-05 | 0.00033309 |
| UTR3 | ANO5     | 11 | 22301379                                                       | 1 | cg06703469                                                                   | 0.764614435 | 0.692608706 | 0.530419827 | -0.234194608 | 4.98E-07 | 3.56E-06   |
| UTR3 | ANO7     | 2  | 242164067/242135579                                            | 2 | cg01410615/cg17353895                                                        | 0.531709145 | 0.407503228 | 0.340160364 | -0.191548781 | 2.08E-11 | 9.77E-10   |
| UTR3 | APBB1    | 11 | 6416634                                                        | 1 | cg05668613                                                                   | 0.584274745 | 0.504451472 | 0.431933973 | -0.152340772 | 2.75E-10 | 5.98E-09   |
| UTR3 | APBB1IP  | 10 | 26856664/26856454                                              | 2 | cg18014277/cg19797516                                                        | 0.634251078 | 0.567977744 | 0.447287009 | -0.186964068 | 2.42E-07 | 1.88E-06   |
| UTR3 | APCDD1   | 18 | 10488229                                                       | 1 | cg18208602                                                                   | 0.757764415 | 0.591042433 | 0.443936245 | -0.31382817  | 1.69E-11 | 8.39E-10   |
| UTR3 | APCS     | 1  | 159558512                                                      | 1 | cg21291134                                                                   | 0.689444045 | 0.605787644 | 0.427001636 | -0.262442409 | 2.26E-07 | 1.77E-06   |
| UTR3 | APOA5    | 11 | 116660514                                                      | 1 | cg08598780                                                                   | 0.691337915 | 0.609925772 | 0.531392209 | -0.159945706 | 7.65E-08 | 6.88E-07   |
| UTR3 | APOBEC3F | 22 | 39440294/39449298                                              | 2 | cg09582545/cg19333614                                                        | 0.921456525 | 0.820357289 | 0.669946377 | -0.251510148 | 2.40E-07 | 1.87E-06   |
| UTR3 | ARC      | 8  | 143692935/143694305/143694295/143694010                        | 4 | cg00487506/cg05415840/cg13172906/cg24450303                                  | 0.713940839 | 0.621943943 | 0.521987426 | -0.191953413 | 3.29E-09 | 4.62E-08   |
| UTR3 | ARHGAP26 | 5  | 142602110                                                      | 1 | cg05185926                                                                   | 0.51960638  | 0.61873905  | 0.689532395 | 0.169926015  | 1.85E-09 | 2.85E-08   |
| UTR3 | ARHGDI   | 17 | 79825681/79826316                                              | 2 | cg10236857/cg25141766                                                        | 0.614159513 | 0.506641975 | 0.424316248 | -0.189843265 | 8.74E-12 | 5.41E-10   |
| UTR3 | ARHGEF15 | 17 | 8225715                                                        | 1 | cg03933062                                                                   | 0.645706645 | 0.546252844 | 0.415816968 | -0.229889677 | 7.01E-10 | 1.25E-08   |
| UTR3 | ARL14    | 3  | 160395719                                                      | 1 | cg20725880                                                                   | 0.485930335 | 0.369562406 | 0.273610573 | -0.212319762 | 6.70E-12 | 4.58E-10   |
| UTR3 | ARL4A    | 7  | 12729527/12728890/12729367                                     | 3 | cg07302938/cg12785342/cg24092907                                             | 0.697944073 | 0.556255906 | 0.411261102 | -0.28668297  | 4.39E-10 | 8.63E-09   |

|      |           |    |                                                                         |   |                                                                               |             |             |             |              |             |             |
|------|-----------|----|-------------------------------------------------------------------------|---|-------------------------------------------------------------------------------|-------------|-------------|-------------|--------------|-------------|-------------|
| UTR3 | ARPP-21   | 3  | 35835606/3572649<br>3                                                   | 2 | cg16468417/cg21852<br>346                                                     | 0.6968133   | 0.644858322 | 0.534254105 | -0.162559195 | 0.000533395 | 0.001752289 |
| UTR3 | ARRDC5    | 19 | 4890970                                                                 | 1 | cg10130497                                                                    | 0.649060535 | 0.492724406 | 0.345601477 | -0.303459058 | 9.55E-13    | 1.20E-10    |
| UTR3 | ARSJ      | 4  | 114823338                                                               | 1 | cg26728709                                                                    | 0.41836045  | 0.277633728 | 0.216224082 | -0.202136368 | 2.35E-13    | 5.50E-11    |
| UTR3 | ASAM      | 11 | 122943141                                                               | 1 | cg18247124                                                                    | 0.593784845 | 0.472878706 | 0.431184855 | -0.16259999  | 2.34E-07    | 1.83E-06    |
| UTR3 | ASB15     | 7  | 123277601                                                               | 1 | cg02621087                                                                    | 0.693562545 | 0.533291556 | 0.408837964 | -0.284724581 | 2.32E-12    | 2.28E-10    |
| UTR3 | ASCL4     | 12 | 108169569/108169<br>928/108170183                                       | 3 | cg01295392/cg01985<br>833/cg23699926                                          | 0.60857134  | 0.695006017 | 0.760260757 | 0.151689417  | 8.47E-12    | 5.34E-10    |
| UTR3 | ASPA      | 17 | 3402504                                                                 | 1 | cg21185242                                                                    | 0.72593518  | 0.645842633 | 0.554620532 | -0.171314648 | 2.54E-05    | 0.000115753 |
| UTR3 | ASTN1     | 1  | 176831160                                                               | 1 | cg08104310                                                                    | 0.499367355 | 0.375349833 | 0.28075905  | -0.218608305 | 1.92E-10    | 4.58E-09    |
| UTR3 | ATG9B     | 7  | 150709877/150711<br>138/150710730/150<br>710447/150711449/<br>150709463 | 6 | cg00448659/cg02027<br>878/cg09519327/cg1<br>5183092/cg25025646<br>/cg25136644 | 0.47813196  | 0.595272763 | 0.673006548 | 0.194874588  | 9.42E-10    | 1.60E-08    |
| UTR3 | ATOH7     | 10 | 69990588                                                                | 1 | cg00001874                                                                    | 0.45284816  | 0.346283617 | 0.293820759 | -0.159027401 | 2.70E-08    | 2.80E-07    |
| UTR3 | AVPR1A    | 12 | 63540400                                                                | 1 | cg10931900                                                                    | 0.73479733  | 0.681570672 | 0.535394582 | -0.199402748 | 1.72E-05    | 8.06E-05    |
| UTR3 | BACH2     | 6  | 90639197                                                                | 1 | cg22758471                                                                    | 0.75454658  | 0.6842184   | 0.529889818 | -0.224656762 | 8.48E-08    | 7.53E-07    |
| UTR3 | BAX       | 19 | 49465047                                                                | 1 | cg22237988                                                                    | 0.95223169  | 0.859445439 | 0.795971445 | -0.156260245 | 5.60E-08    | 5.26E-07    |
| UTR3 | BBS12     | 4  | 123665848                                                               | 1 | cg12927785                                                                    | 0.70605296  | 0.587795556 | 0.477194623 | -0.228858337 | 1.15E-10    | 3.04E-09    |
| UTR3 | BCL2L1    | 20 | 30252580                                                                | 1 | cg25291404                                                                    | 0.455911625 | 0.3690684   | 0.290757568 | -0.165154057 | 4.65E-10    | 9.01E-09    |
| UTR3 | BFAR      | 16 | 14762377                                                                | 1 | cg06081917                                                                    | 0.7584357   | 0.619699583 | 0.574493441 | -0.183942259 | 3.59E-09    | 4.97E-08    |
| UTR3 | BHLHE23   | 20 | 61637360                                                                | 1 | cg06228507                                                                    | 0.44108202  | 0.5173817   | 0.628947414 | 0.187865394  | 5.42E-08    | 5.12E-07    |
| UTR3 | BLOC1S1   | 12 | 56113434                                                                | 1 | cg08222053                                                                    | 0.67639435  | 0.585559583 | 0.502288741 | -0.174105609 | 2.13E-09    | 3.22E-08    |
| UTR3 | BNC1      | 15 | 83926030                                                                | 1 | cg08633249                                                                    | 0.424365525 | 0.323622278 | 0.229137673 | -0.195227852 | 2.52E-12    | 2.36E-10    |
| UTR3 | BNC2      | 9  | 16413736                                                                | 1 | cg14061067                                                                    | 0.549558195 | 0.451440711 | 0.359985318 | -0.189572877 | 8.83E-11    | 2.52E-09    |
| UTR3 | BNIP1     | 1  | 151019560/151019<br>727/151019274                                       | 3 | cg11852073/cg13072<br>446/cg23822289                                          | 0.853799177 | 0.731346567 | 0.640995742 | -0.212803434 | 2.62E-07    | 2.02E-06    |
| UTR3 | BPIL2     | 22 | 32810284                                                                | 1 | cg09696535                                                                    | 0.591864745 | 0.450350756 | 0.388786845 | -0.2030779   | 2.78E-07    | 2.13E-06    |
| UTR3 | BRD2      | 6  | 32948526                                                                | 1 | cg02590376                                                                    | 0.81883865  | 0.721197156 | 0.6679512   | -0.15088745  | 1.28E-07    | 1.07E-06    |
| UTR3 | BTBD9     | 6  | 38141572/3814187<br>9/38141763                                          | 3 | cg00382470/cg01504<br>030/cg14151158                                          | 0.713871383 | 0.591239753 | 0.548570014 | -0.165301369 | 9.39E-11    | 2.65E-09    |
| UTR3 | BTN3A2    | 6  | 26375990                                                                | 1 | cg21432745                                                                    | 0.826145275 | 0.694975528 | 0.6735399   | -0.152605375 | 7.11E-10    | 1.27E-08    |
| UTR3 | C10orf128 | 10 | 50363896                                                                | 1 | cg25921502                                                                    | 0.56676901  | 0.409657111 | 0.286231195 | -0.280537815 | 7.01E-15    | 7.46E-12    |
| UTR3 | C10orf53  | 10 | 50902733/5091666<br>7                                                   | 2 | cg13998871/cg16657<br>724                                                     | 0.652929945 | 0.559369928 | 0.432735875 | -0.22019407  | 2.33E-10    | 5.25E-09    |
| UTR3 | C10orf71  | 10 | 50535073                                                                | 1 | cg06322518                                                                    | 0.60387193  | 0.481421506 | 0.4180215   | -0.18585043  | 5.18E-10    | 9.72E-09    |
| UTR3 | C10orf72  | 10 | 50311040/5022462<br>8                                                   | 2 | cg00215019/cg11115<br>673                                                     | 0.653541793 | 0.546624864 | 0.420936489 | -0.232605304 | 3.08E-10    | 6.55E-09    |

|      |           |    |                   |   |                       |             |             |             |              |             |             |
|------|-----------|----|-------------------|---|-----------------------|-------------|-------------|-------------|--------------|-------------|-------------|
| UTR3 | C10orf96  | 10 | 118138962         | 1 | cg26713755            | 0.736713595 | 0.656486389 | 0.561362468 | -0.175351127 | 0.000331485 | 0.001147716 |
| UTR3 | C11orf53  | 11 | 111156908         | 1 | cg25129781            | 0.535471085 | 0.388971633 | 0.317235595 | -0.21823549  | 6.14E-11    | 2.01E-09    |
| UTR3 | C11orf9   | 11 | 61555930          | 1 | cg14981432            | 0.52200928  | 0.424617683 | 0.367354064 | -0.154655216 | 1.26E-05    | 6.15E-05    |
| UTR3 | C11orf93  | 11 | 111179338         | 1 | cg05817996            | 0.670810695 | 0.576874311 | 0.520198595 | -0.1506121   | 1.52E-09    | 2.41E-08    |
| UTR3 | C12orf53  | 12 | 6803244           | 1 | cg23727813            | 0.553147925 | 0.432452039 | 0.358179905 | -0.19496802  | 1.06E-12    | 1.30E-10    |
| UTR3 | C12orf77  | 12 | 25147218          | 1 | cg21156602            | 0.85398101  | 0.789365994 | 0.701775209 | -0.152205801 | 3.37E-05    | 0.000148011 |
| UTR3 | C13orf33  | 13 | 31499033          | 1 | cg22591875            | 0.54903895  | 0.472093506 | 0.369233745 | -0.179805205 | 3.62E-09    | 5.01E-08    |
| UTR3 | C13orf36  | 13 | 37271030          | 1 | cg03603888            | 0.356577185 | 0.29698475  | 0.204972264 | -0.151604921 | 2.77E-12    | 2.48E-10    |
| UTR3 | C14orf49  | 14 | 95884023          | 1 | cg10506461            | 0.81608218  | 0.744470444 | 0.66099855  | -0.15508363  | 6.77E-06    | 3.53E-05    |
| UTR3 | C15orf2   | 15 | 24924925          | 1 | cg20809224            | 0.5228759   | 0.427715961 | 0.314691786 | -0.208184114 | 3.80E-10    | 7.81E-09    |
| UTR3 | C15orf24  | 15 | 34376369          | 1 | cg21292201            | 0.45959211  | 0.361517728 | 0.290818582 | -0.168773528 | 2.30E-09    | 3.42E-08    |
| UTR3 | C15orf41  | 15 | 37100941          | 1 | cg26451373            | 0.673976035 | 0.626238167 | 0.467211527 | -0.206764508 | 1.15E-06    | 7.30E-06    |
| UTR3 | C15orf57  | 15 | 40846077          | 1 | cg20602300            | 0.54771958  | 0.68910715  | 0.729808577 | 0.182088997  | 1.58E-08    | 1.76E-07    |
| UTR3 | C16orf62  | 16 | 19712046          | 1 | cg03301165            | 0.572527425 | 0.463875044 | 0.371225995 | -0.20130143  | 2.13E-10    | 4.92E-09    |
| UTR3 | C17orf102 | 17 | 32904255/32903717 | 2 | cg12309348/cg26090020 | 0.678335128 | 0.564225969 | 0.39224943  | -0.286085698 | 3.12E-14    | 1.22E-11    |
| UTR3 | C17orf106 | 17 | 73996423/73996656 | 2 | cg14666354/cg25711239 | 0.66384261  | 0.526577311 | 0.457893418 | -0.205949192 | 1.68E-08    | 1.86E-07    |
| UTR3 | C17orf81  | 17 | 7163136           | 1 | cg21762727            | 0.596807885 | 0.450805822 | 0.363989409 | -0.232818476 | 1.05E-11    | 5.93E-10    |
| UTR3 | C19orf57  | 19 | 13993318          | 1 | cg07606495            | 0.448059815 | 0.302052767 | 0.255725632 | -0.192334183 | 6.12E-13    | 9.33E-11    |
| UTR3 | C1orf64   | 1  | 16332953          | 1 | cg06947191            | 0.828336895 | 0.730978    | 0.609793355 | -0.21854354  | 7.04E-08    | 6.40E-07    |
| UTR3 | C1orf91   | 1  | 32681995          | 1 | cg15726025            | 0.56673271  | 0.42936055  | 0.34954315  | -0.21718956  | 1.76E-10    | 4.27E-09    |
| UTR3 | C1R       | 12 | 7187715           | 1 | cg15837470            | 0.616887595 | 0.517457528 | 0.340778336 | -0.276109259 | 2.61E-11    | 1.12E-09    |
| UTR3 | C1RL      | 12 | 7248724           | 1 | cg11024687            | 0.508294735 | 0.375349833 | 0.283108391 | -0.225186344 | 8.26E-15    | 7.46E-12    |
| UTR3 | C1S       | 12 | 7178171           | 1 | cg24212392            | 0.72310005  | 0.566163411 | 0.452192391 | -0.270907659 | 2.54E-10    | 5.59E-09    |
| UTR3 | C20orf103 | 20 | 9511102           | 1 | cg09732036            | 0.46527833  | 0.358929122 | 0.304503323 | -0.160775007 | 4.26E-09    | 5.78E-08    |
| UTR3 | C20orf186 | 20 | 31699304          | 1 | cg26615188            | 0.63801296  | 0.534514744 | 0.40539595  | -0.23261701  | 2.28E-11    | 1.02E-09    |
| UTR3 | C20orf197 | 20 | 58647209          | 1 | cg17734137            | 0.783764305 | 0.707352856 | 0.612362223 | -0.171402082 | 0.00015472  | 0.000574683 |
| UTR3 | C21orf7   | 21 | 30547239          | 1 | cg26289665            | 0.56935713  | 0.471611994 | 0.416196705 | -0.153160425 | 2.33E-06    | 1.37E-05    |
| UTR3 | C22orf32  | 22 | 42479360          | 1 | cg05038367            | 0.799956925 | 0.744163067 | 0.618899545 | -0.18105738  | 1.05E-07    | 9.08E-07    |
| UTR3 | C2orf71   | 2  | 29287725          | 1 | cg23429306            | 0.67494109  | 0.570756717 | 0.484960073 | -0.189981017 | 9.49E-09    | 1.14E-07    |
| UTR3 | C2orf88   | 2  | 191065479         | 1 | cg05277425            | 0.51259744  | 0.453317144 | 0.360020968 | -0.152576472 | 2.29E-08    | 2.44E-07    |
| UTR3 | C2orf90   | 2  | 903676            | 1 | cg09613130            | 0.83853972  | 0.775605406 | 0.631398655 | -0.207141065 | 1.39E-05    | 6.68E-05    |
| UTR3 | C3orf18   | 3  | 50596116          | 1 | cg09562331            | 0.51806712  | 0.42759935  | 0.347452086 | -0.170615034 | 2.27E-10    | 5.19E-09    |
| UTR3 | C3orf32   | 3  | 8661519           | 1 | cg09248934            | 0.568627975 | 0.367923972 | 0.268243714 | -0.300384261 | 1.28E-14    | 7.46E-12    |
| UTR3 | C4orf46   | 4  | 159589048         | 1 | cg13698937            | 0.861857685 | 0.785895739 | 0.705059382 | -0.156798303 | 1.60E-06    | 9.82E-06    |

|      |          |    |                                     |   |                                             |             |             |             |              |          |             |
|------|----------|----|-------------------------------------|---|---------------------------------------------|-------------|-------------|-------------|--------------|----------|-------------|
| UTR3 | C5orf38  | 5  | 2755158/2755376                     | 2 | cg11337945/cg23248357                       | 0.259368058 | 0.314174429 | 0.422762336 | 0.163394278  | 4.13E-05 | 0.000177621 |
| UTR3 | C5orf39  | 5  | 43039410                            | 1 | cg26942801                                  | 0.381407455 | 0.254058522 | 0.14865252  | -0.232754935 | 6.67E-10 | 1.20E-08    |
| UTR3 | C5orf47  | 5  | 173430662                           | 1 | cg19486949                                  | 0.67620277  | 0.605296244 | 0.517407514 | -0.158795256 | 3.58E-05 | 0.00015613  |
| UTR3 | C5orf49  | 5  | 7831537                             | 1 | cg04238199                                  | 0.527769625 | 0.395474722 | 0.336363391 | -0.191406234 | 1.30E-08 | 1.51E-07    |
| UTR3 | C6       | 5  | 41142881                            | 1 | cg11590974                                  | 0.555414815 | 0.41633355  | 0.328930577 | -0.226484238 | 1.08E-11 | 6.05E-10    |
| UTR3 | C6orf132 | 6  | 42071219                            | 1 | cg00173538                                  | 0.55992526  | 0.452869894 | 0.396360477 | -0.163564783 | 2.23E-07 | 1.75E-06    |
| UTR3 | C6orf222 | 6  | 36283929                            | 1 | cg02959688                                  | 0.68958497  | 0.553119011 | 0.432943623 | -0.256641347 | 4.95E-12 | 3.80E-10    |
| UTR3 | C7orf16  | 7  | 31747928                            | 1 | cg01227294                                  | 0.735600575 | 0.711654978 | 0.509239177 | -0.226361398 | 9.26E-08 | 8.11E-07    |
| UTR3 | C7orf31  | 7  | 25174492                            | 1 | cg23302989                                  | 0.456370235 | 0.387594661 | 0.295347014 | -0.161023221 | 2.21E-09 | 3.30E-08    |
| UTR3 | C7orf59  | 7  | 99751594                            | 1 | cg06739004                                  | 0.61314792  | 0.506904611 | 0.4465261   | -0.16662182  | 6.24E-10 | 1.14E-08    |
| UTR3 | C8A      | 1  | 57383752                            | 1 | cg23844013                                  | 0.69419162  | 0.557325711 | 0.462433014 | -0.231758606 | 8.10E-08 | 7.25E-07    |
| UTR3 | C9orf86  | 9  | 139735010/139735338                 | 2 | cg12986501/cg21175873                       | 0.633834275 | 0.547546    | 0.483641805 | -0.15019247  | 1.13E-09 | 1.86E-08    |
| UTR3 | CABIN1   | 22 | 24574487                            | 1 | cg22804358                                  | 0.801910295 | 0.729260528 | 0.631959032 | -0.169951263 | 5.45E-08 | 5.14E-07    |
| UTR3 | CABYR    | 18 | 21741492/21737584                   | 2 | cg05060976/cg05926667                       | 0.58443752  | 0.4744687   | 0.3797834   | -0.20465412  | 2.46E-09 | 3.62E-08    |
| UTR3 | CACNA1H  | 16 | 1271741/1271153/1271505             | 3 | cg03553819/cg16577083/cg27338302            | 0.702851358 | 0.585479443 | 0.464144995 | -0.238706363 | 6.52E-13 | 9.65E-11    |
| UTR3 | CACNA1I  | 22 | 40084724/40082521                   | 2 | cg19287501/cg22807707                       | 0.72517109  | 0.650355456 | 0.546275832 | -0.178895258 | 5.65E-06 | 3.00E-05    |
| UTR3 | CACNA2D1 | 7  | 81579463                            | 1 | cg25161868                                  | 0.494502705 | 0.368516528 | 0.2991846   | -0.195318105 | 1.31E-09 | 2.12E-08    |
| UTR3 | CACNB3   | 12 | 49222623                            | 1 | cg18046311                                  | 0.71615957  | 0.61241805  | 0.516350918 | -0.199808652 | 2.70E-09 | 3.91E-08    |
| UTR3 | CACNG1   | 17 | 65052432                            | 1 | cg25551622                                  | 0.58069439  | 0.486268639 | 0.400511164 | -0.180183226 | 3.18E-10 | 6.68E-09    |
| UTR3 | CACNG7   | 19 | 54445888                            | 1 | cg21477176                                  | 0.54189333  | 0.599618967 | 0.750982605 | 0.209089275  | 4.65E-09 | 6.20E-08    |
| UTR3 | CADM3    | 1  | 159171213/159172620                 | 2 | cg15722977/cg20944283                       | 0.58348568  | 0.4691273   | 0.391362782 | -0.192122898 | 8.61E-13 | 1.14E-10    |
| UTR3 | CALB2    | 16 | 71420541/71424252                   | 2 | cg04628802/cg06389098                       | 0.501763715 | 0.410015206 | 0.323653652 | -0.178110063 | 5.33E-11 | 1.88E-09    |
| UTR3 | CALCB    | 11 | 15099930                            | 1 | cg14023329                                  | 0.514916165 | 0.386493417 | 0.292157673 | -0.222758492 | 3.90E-10 | 7.91E-09    |
| UTR3 | CALCRL   | 2  | 188210673                           | 1 | cg22374415                                  | 0.770731225 | 0.673276206 | 0.466355305 | -0.30437592  | 6.33E-08 | 5.83E-07    |
| UTR3 | CALM2    | 2  | 47387494                            | 1 | cg21361646                                  | 0.72519012  | 0.612419233 | 0.545967055 | -0.179223065 | 8.68E-11 | 2.49E-09    |
| UTR3 | CAMKV    | 3  | 49896651                            | 1 | cg08827110                                  | 0.61923488  | 0.493730678 | 0.386235873 | -0.232999007 | 6.94E-10 | 1.24E-08    |
| UTR3 | CANX     | 5  | 179158569/179156985                 | 2 | cg04073204/cg12865675                       | 0.79258621  | 0.711712756 | 0.631114159 | -0.161472051 | 3.03E-06 | 1.74E-05    |
| UTR3 | CAV3     | 3  | 8787638                             | 1 | cg08872064                                  | 0.62623978  | 0.530147033 | 0.462441209 | -0.163798571 | 5.92E-08 | 5.52E-07    |
| UTR3 | CBLN1    | 16 | 49312238/49312543/49313307/49312560 | 4 | cg01687680/cg02696327/cg04438525/cg06919440 | 0.260911125 | 0.325161937 | 0.453050449 | 0.192139324  | 4.12E-08 | 4.02E-07    |
| UTR3 | CBLN2    | 18 | 70205221                            | 1 | cg21298444                                  | 0.548542305 | 0.445515383 | 0.3542196   | -0.194322705 | 3.35E-08 | 3.36E-07    |

|      |          |    |                                         |   |                                             |             |             |             |              |          |             |
|------|----------|----|-----------------------------------------|---|---------------------------------------------|-------------|-------------|-------------|--------------|----------|-------------|
| UTR3 | CCDC102A | 16 | 57546535                                | 1 | cg07241532                                  | 0.586131225 | 0.467632    | 0.405298682 | -0.180832543 | 2.55E-11 | 1.10E-09    |
| UTR3 | CCDC105  | 19 | 15133948                                | 1 | cg25690897                                  | 0.37753688  | 0.451462378 | 0.548489895 | 0.170953015  | 9.24E-08 | 8.11E-07    |
| UTR3 | CCDC129  | 7  | 31692686                                | 1 | cg00397871                                  | 0.742470715 | 0.654237539 | 0.554428345 | -0.18804237  | 1.01E-06 | 6.50E-06    |
| UTR3 | CCDC13   | 3  | 42750454                                | 1 | cg18816595                                  | 0.69771071  | 0.592404394 | 0.454997527 | -0.242713183 | 5.50E-09 | 7.19E-08    |
| UTR3 | CCDC140  | 2  | 223169352/223169501/223169609/223169586 | 4 | cg00699392/cg02224980/cg09486778/cg15825116 | 0.316794793 | 0.416841439 | 0.540333326 | 0.223538534  | 1.61E-08 | 1.79E-07    |
| UTR3 | CCDC21   | 1  | 26605141/26603970                       | 2 | cg12445424/cg21646082                       | 0.524107395 | 0.417982561 | 0.349103759 | -0.175003636 | 1.45E-09 | 2.30E-08    |
| UTR3 | CCDC33   | 15 | 74627589                                | 1 | cg08932277                                  | 0.723042435 | 0.662957506 | 0.562780114 | -0.160262321 | 1.87E-05 | 8.78E-05    |
| UTR3 | CCDC40   | 17 | 78073854/78073693                       | 2 | cg04028464/cg06485101                       | 0.62632461  | 0.529677075 | 0.436104464 | -0.190220146 | 1.24E-11 | 6.78E-10    |
| UTR3 | CCDC46   | 17 | 63632069                                | 1 | cg11989257                                  | 0.866972145 | 0.705373456 | 0.653869918 | -0.213102227 | 3.24E-08 | 3.27E-07    |
| UTR3 | CCDC56   | 17 | 40949954/40949811                       | 2 | cg22239334/cg24994625                       | 0.599132055 | 0.471085933 | 0.364984909 | -0.234147146 | 2.75E-11 | 1.15E-09    |
| UTR3 | CCDC74B  | 2  | 130897120                               | 1 | cg15638768                                  | 0.67402883  | 0.511845961 | 0.451492682 | -0.222536148 | 4.94E-09 | 6.52E-08    |
| UTR3 | CCDC8    | 19 | 46913677                                | 1 | cg26232899                                  | 0.756164505 | 0.661324128 | 0.514846864 | -0.241317641 | 6.88E-08 | 6.27E-07    |
| UTR3 | CCDC80   | 3  | 112323619                               | 1 | cg23451678                                  | 0.3660656   | 0.281015489 | 0.191044916 | -0.175020684 | 2.52E-06 | 1.48E-05    |
| UTR3 | CCDC83   | 11 | 85630744                                | 1 | cg20891655                                  | 0.750618375 | 0.639808128 | 0.5349994   | -0.215618975 | 9.50E-09 | 1.14E-07    |
| UTR3 | CCKBR    | 11 | 6293288/6292896                         | 2 | cg04488853/cg25740457                       | 0.702458888 | 0.630611583 | 0.53709797  | -0.165360917 | 4.14E-07 | 3.00E-06    |
| UTR3 | CCL19    | 9  | 34689585                                | 1 | cg13665853                                  | 0.52616351  | 0.422219206 | 0.341981305 | -0.184182205 | 1.52E-10 | 3.74E-09    |
| UTR3 | CCNA1    | 13 | 37016876/37016859                       | 2 | cg01774835/cg07345354                       | 0.708717358 | 0.635044906 | 0.502361166 | -0.206356192 | 2.25E-05 | 0.000103823 |
| UTR3 | CCR3     | 3  | 46307918                                | 1 | cg03050629                                  | 0.80339943  | 0.67791555  | 0.569119505 | -0.234279925 | 8.37E-07 | 5.50E-06    |
| UTR3 | CD1D     | 1  | 158155757                               | 1 | cg18234111                                  | 0.57826903  | 0.392698378 | 0.269737286 | -0.308531744 | 1.04E-10 | 2.84E-09    |
| UTR3 | CD200R1  | 3  | 112642487/112647810                     | 2 | cg00246486/cg17069590                       | 0.69815276  | 0.554718053 | 0.430179209 | -0.267973551 | 9.94E-10 | 1.69E-08    |
| UTR3 | CD207    | 2  | 71057572                                | 1 | cg03976366                                  | 0.62993436  | 0.537241128 | 0.416844268 | -0.213090092 | 3.57E-08 | 3.54E-07    |
| UTR3 | CD300A   | 17 | 72480644                                | 1 | cg14018141                                  | 0.35063887  | 0.265813022 | 0.19434425  | -0.15629462  | 8.20E-10 | 1.42E-08    |
| UTR3 | CD300LF  | 17 | 72690539                                | 1 | cg08808817                                  | 0.71191849  | 0.547566756 | 0.448119541 | -0.263798949 | 4.05E-09 | 5.52E-08    |
| UTR3 | CD4      | 12 | 6929671/6929591                         | 2 | cg03795245/cg08349804                       | 0.63156232  | 0.535919747 | 0.445486777 | -0.186075543 | 6.62E-09 | 8.40E-08    |
| UTR3 | CD69     | 12 | 9905753                                 | 1 | cg05179921                                  | 0.649408575 | 0.522604261 | 0.408584964 | -0.240823611 | 1.20E-10 | 3.13E-09    |
| UTR3 | CD96     | 3  | 111370016                               | 1 | cg25785241                                  | 0.65074642  | 0.555912633 | 0.449104745 | -0.201641675 | 1.87E-09 | 2.88E-08    |
| UTR3 | CD97     | 19 | 14519121                                | 1 | cg16738984                                  | 0.49682087  | 0.380979556 | 0.304083459 | -0.192737411 | 7.64E-11 | 2.32E-09    |
| UTR3 | CDC42EP1 | 22 | 37965042                                | 1 | cg26347632                                  | 0.44897573  | 0.364659733 | 0.282027723 | -0.166948007 | 6.01E-10 | 1.11E-08    |
| UTR3 | CDCA5    | 11 | 64845676                                | 1 | cg09955152                                  | 0.63171157  | 0.557927928 | 0.449717609 | -0.181993961 | 7.25E-08 | 6.57E-07    |
| UTR3 | CDH13    | 16 | 83829911                                | 1 | cg05847519                                  | 0.672865515 | 0.479692039 | 0.321072532 | -0.351792983 | 1.61E-14 | 8.62E-12    |
| UTR3 | CDH18    | 5  | 19473185/19478817                       | 2 | cg06700166/cg08814749                       | 0.682518545 | 0.563838433 | 0.441274355 | -0.24124419  | 8.78E-07 | 5.73E-06    |



|      |          |    |                                                                                                               |    |                                                                                                                                       |             |             |             |              |             |             |
|------|----------|----|---------------------------------------------------------------------------------------------------------------|----|---------------------------------------------------------------------------------------------------------------------------------------|-------------|-------------|-------------|--------------|-------------|-------------|
| UTR3 | CDH22    | 20 | 44802548                                                                                                      | 1  | cg10329468                                                                                                                            | 0.556791245 | 0.4375503   | 0.346644341 | -0.210146904 | 1.36E-10    | 3.42E-09    |
| UTR3 | CDK6     | 7  | 92242243/9224319<br>1/92242370/922382<br>07/92238086/92237<br>896/92238248/9223<br>7376/92238364/922<br>38156 | 10 | cg03330377/cg05517<br>400/cg05977021/cg0<br>6688763/cg07413467<br>/cg14100946/cg1526<br>1712/cg15732164/cg<br>23628117/cg2528439<br>7 | 0.79496262  | 0.679943925 | 0.594902049 | -0.200060571 | 7.73E-05    | 0.000310424 |
| UTR3 | CEACAM21 | 19 | 42093086                                                                                                      | 1  | cg08478046                                                                                                                            | 0.53352205  | 0.417277772 | 0.306848605 | -0.226673445 | 3.62E-13    | 6.37E-11    |
| UTR3 | CEACAM5  | 19 | 42234062                                                                                                      | 1  | cg24790544                                                                                                                            | 0.575697765 | 0.448352528 | 0.349409836 | -0.226287929 | 4.18E-10    | 8.27E-09    |
| UTR3 | CEBPE    | 14 | 23586582                                                                                                      | 1  | cg02246876                                                                                                                            | 0.784518155 | 0.6987541   | 0.601300527 | -0.183217628 | 7.25E-06    | 3.74E-05    |
| UTR3 | CENPQ    | 6  | 49460031                                                                                                      | 1  | cg14479014                                                                                                                            | 0.809034365 | 0.619657528 | 0.547317405 | -0.26171696  | 7.29E-11    | 2.25E-09    |
| UTR3 | CERK     | 22 | 47081634/4708226<br>0/47082044/470819<br>03/47081751                                                          | 5  | cg05602642/cg06766<br>034/cg12509665/cg1<br>8614510/cg24157349                                                                        | 0.460573208 | 0.360941497 | 0.286367183 | -0.174206025 | 1.77E-10    | 4.27E-09    |
| UTR3 | CES8     | 16 | 67043406                                                                                                      | 1  | cg06815910                                                                                                                            | 0.63243878  | 0.561410456 | 0.448128127 | -0.184310653 | 1.40E-07    | 1.16E-06    |
| UTR3 | CHCHD1   | 10 | 75543235                                                                                                      | 1  | cg27048208                                                                                                                            | 0.45720657  | 0.363842811 | 0.271766059 | -0.185440511 | 8.53E-12    | 5.34E-10    |
| UTR3 | CHGB     | 20 | 5905708                                                                                                       | 1  | cg07140797                                                                                                                            | 0.769578445 | 0.692347428 | 0.548339173 | -0.221239272 | 1.09E-05    | 5.39E-05    |
| UTR3 | CHL1     | 3  | 447414                                                                                                        | 1  | cg06088575                                                                                                                            | 0.80915255  | 0.755713944 | 0.646481805 | -0.162670745 | 5.27E-05    | 0.000220398 |
| UTR3 | CHRD     | 3  | 184107534                                                                                                     | 1  | cg05308645                                                                                                                            | 0.609541755 | 0.533995211 | 0.447928145 | -0.16161361  | 2.69E-08    | 2.79E-07    |
| UTR3 | CHRNA2   | 8  | 27318934/2731739<br>4                                                                                         | 2  | cg00254556/cg16291<br>069                                                                                                             | 0.561193683 | 0.452708514 | 0.370846175 | -0.190347508 | 7.41E-12    | 4.98E-10    |
| UTR3 | CHST10   | 2  | 101008576                                                                                                     | 1  | cg01660407                                                                                                                            | 0.87220465  | 0.676626267 | 0.578576291 | -0.293628359 | 2.20E-08    | 2.35E-07    |
| UTR3 | CHST4    | 16 | 71572050                                                                                                      | 1  | cg02517497                                                                                                                            | 0.457763735 | 0.359047444 | 0.300687573 | -0.157076162 | 2.26E-11    | 1.02E-09    |
| UTR3 | CIB1     | 15 | 90773570                                                                                                      | 1  | cg01438056                                                                                                                            | 0.4691391   | 0.366088739 | 0.302516014 | -0.166623086 | 1.33E-08    | 1.54E-07    |
| UTR3 | CIB3     | 19 | 16272242                                                                                                      | 1  | cg01541846                                                                                                                            | 0.66506362  | 0.510210433 | 0.394911218 | -0.270152402 | 2.85E-11    | 1.18E-09    |
| UTR3 | CISD1    | 10 | 60047571                                                                                                      | 1  | cg09500807                                                                                                                            | 0.51932251  | 0.450967761 | 0.353116159 | -0.166206351 | 1.64E-11    | 8.16E-10    |
| UTR3 | CLDN18   | 3  | 137750103                                                                                                     | 1  | cg09236311                                                                                                                            | 0.64847136  | 0.482089061 | 0.334410223 | -0.314061137 | 8.37E-11    | 2.46E-09    |
| UTR3 | CLDN22   | 4  | 184240083                                                                                                     | 1  | cg26806835                                                                                                                            | 0.53614318  | 0.4404506   | 0.324162777 | -0.211980403 | 6.63E-10    | 1.20E-08    |
| UTR3 | CLDN4    | 7  | 73246406                                                                                                      | 1  | cg02874145                                                                                                                            | 0.39144086  | 0.310749389 | 0.221575818 | -0.169865042 | 2.12E-09    | 3.20E-08    |
| UTR3 | CLDN7    | 17 | 7163599                                                                                                       | 1  | cg13724311                                                                                                                            | 0.623190215 | 0.48396235  | 0.391549991 | -0.231640224 | 7.74E-12    | 5.03E-10    |
| UTR3 | CLEC10A  | 17 | 6977901                                                                                                       | 1  | cg21215820                                                                                                                            | 0.747247565 | 0.634488444 | 0.596580677 | -0.150666888 | 0.000108224 | 0.000419061 |
| UTR3 | CLEC2A   | 12 | 10065986                                                                                                      | 1  | cg24640735                                                                                                                            | 0.677238055 | 0.589198289 | 0.385397318 | -0.291840737 | 2.61E-10    | 5.73E-09    |
| UTR3 | CLEC4D   | 12 | 8674684                                                                                                       | 1  | cg05582397                                                                                                                            | 0.660027525 | 0.503199733 | 0.378058127 | -0.281969398 | 7.08E-11    | 2.20E-09    |
| UTR3 | CLEC4E   | 12 | 8686707                                                                                                       | 1  | cg16009120                                                                                                                            | 0.755298605 | 0.652566894 | 0.543987982 | -0.211310623 | 7.43E-06    | 3.82E-05    |
| UTR3 | CLSTN2   | 3  | 140286910                                                                                                     | 1  | cg05092583                                                                                                                            | 0.774808055 | 0.647497739 | 0.514253723 | -0.260554332 | 3.97E-07    | 2.89E-06    |
| UTR3 | CLTB     | 5  | 175819705                                                                                                     | 1  | cg22584580                                                                                                                            | 0.588831405 | 0.503498322 | 0.399519323 | -0.189312082 | 5.67E-11    | 1.93E-09    |

|      |          |    |                                                         |   |                                                                                         |             |             |             |              |          |          |
|------|----------|----|---------------------------------------------------------|---|-----------------------------------------------------------------------------------------|-------------|-------------|-------------|--------------|----------|----------|
| UTR3 | CLVS2    | 6  | 123385000                                               | 1 | cg03469655                                                                              | 0.57915359  | 0.454929944 | 0.339208118 | -0.239945472 | 9.53E-07 | 6.16E-06 |
| UTR3 | CMTM1    | 16 | 66612955                                                | 1 | cg09849405                                                                              | 0.204523596 | 0.377786624 | 0.654003182 | 0.449479587  | 1.19E-09 | 1.96E-08 |
| UTR3 | CNDP1    | 18 | 72252164                                                | 1 | cg21700214                                                                              | 0.68480289  | 0.509472078 | 0.431826264 | -0.252976626 | 1.36E-09 | 2.17E-08 |
| UTR3 | CNPY4    | 7  | 99723100                                                | 1 | cg26650651                                                                              | 0.73284279  | 0.631564522 | 0.522634659 | -0.210208131 | 5.78E-08 | 5.41E-07 |
| UTR3 | CNTLN    | 9  | 17503269                                                | 1 | cg14418582                                                                              | 0.765941525 | 0.699792756 | 0.5799673   | -0.185974225 | 8.41E-06 | 4.28E-05 |
| UTR3 | CNTN5    | 11 | 100227279                                               | 1 | cg03587117                                                                              | 0.686754415 | 0.589920333 | 0.417679709 | -0.269074706 | 3.44E-08 | 3.43E-07 |
| UTR3 | COG5     | 7  | 106842512/106842632                                     | 2 | cg10840361/cg24556660                                                                   | 0.504900923 | 0.399028481 | 0.33026438  | -0.174636543 | 4.83E-11 | 1.76E-09 |
| UTR3 | COL29A1  | 3  | 130203349                                               | 1 | cg24315710                                                                              | 0.472933315 | 0.351654789 | 0.235141541 | -0.237791774 | 3.11E-13 | 5.79E-11 |
| UTR3 | COL9A1   | 6  | 70926272                                                | 1 | cg20682720                                                                              | 0.72759427  | 0.624673161 | 0.5228355   | -0.20475877  | 1.64E-07 | 1.34E-06 |
| UTR3 | COPS6    | 7  | 99689591                                                | 1 | cg10192641                                                                              | 0.70685842  | 0.610558761 | 0.546908077 | -0.159950343 | 6.12E-07 | 4.25E-06 |
| UTR3 | COQ7     | 16 | 19089709                                                | 1 | cg16660394                                                                              | 0.63601539  | 0.753120594 | 0.787432045 | 0.151416655  | 4.06E-08 | 3.97E-07 |
| UTR3 | CORO2A   | 9  | 100883593                                               | 1 | cg13836518                                                                              | 0.347780695 | 0.219338494 | 0.175570846 | -0.172209849 | 5.46E-11 | 1.89E-09 |
| UTR3 | CPA3     | 3  | 148614668                                               | 1 | cg18516150                                                                              | 0.371184205 | 0.282227461 | 0.217191218 | -0.153992987 | 2.29E-11 | 1.02E-09 |
| UTR3 | CPLX1    | 4  | 779173/778827/778924/779230/779691/779480/779880/779568 | 8 | cg05448404/cg06672737/cg06673130/cg06821199/cg07434284/cg17128947/cg17397631/cg18638914 | 0.373247237 | 0.5248243   | 0.645681274 | 0.272434036  | 2.70E-09 | 3.91E-08 |
| UTR3 | CPLX2    | 5  | 175309346                                               | 1 | cg10663557                                                                              | 0.62226162  | 0.532455511 | 0.406938686 | -0.215322934 | 1.24E-06 | 7.78E-06 |
| UTR3 | CRABP1   | 15 | 78640536/78640434                                       | 2 | cg07199257/cg26270695                                                                   | 0.605740995 | 0.471064258 | 0.450081973 | -0.155659022 | 5.65E-09 | 7.36E-08 |
| UTR3 | CRADD    | 12 | 94244496                                                | 1 | cg05059922                                                                              | 0.693583035 | 0.546979089 | 0.489816114 | -0.203766921 | 3.36E-09 | 4.70E-08 |
| UTR3 | CRISPLD1 | 8  | 75946479                                                | 1 | cg12133103                                                                              | 0.792506815 | 0.670728394 | 0.492556241 | -0.299950574 | 4.19E-09 | 5.69E-08 |
| UTR3 | CRP      | 1  | 159682497                                               | 1 | cg04861230                                                                              | 0.58299582  | 0.429962206 | 0.335184786 | -0.247811034 | 1.77E-13 | 4.62E-11 |
| UTR3 | CSMD2    | 1  | 33982683/33985111                                       | 2 | cg04159098/cg08861449                                                                   | 0.730240505 | 0.637207475 | 0.557029289 | -0.173211216 | 1.39E-08 | 1.60E-07 |
| UTR3 | CSPG5    | 3  | 47603786                                                | 1 | cg23009042                                                                              | 0.40799713  | 0.294935517 | 0.2450812   | -0.16291593  | 1.05E-09 | 1.75E-08 |
| UTR3 | CST4     | 20 | 23666505                                                | 1 | cg13974790                                                                              | 0.48614463  | 0.385764172 | 0.27210395  | -0.21404068  | 1.72E-13 | 4.61E-11 |
| UTR3 | CTSF     | 11 | 66330936                                                | 1 | cg19255818                                                                              | 0.7097867   | 0.629014694 | 0.495598236 | -0.214188464 | 1.70E-07 | 1.38E-06 |
| UTR3 | CX3CR1   | 3  | 39306129                                                | 1 | cg04498110                                                                              | 0.63816995  | 0.511105922 | 0.357256145 | -0.280913805 | 1.98E-10 | 4.66E-09 |
| UTR3 | CXCL2    | 4  | 74963112                                                | 1 | cg01470535                                                                              | 0.588330015 | 0.436522583 | 0.34538545  | -0.242944565 | 3.13E-13 | 5.79E-11 |
| UTR3 | CXCL3    | 4  | 74902951                                                | 1 | cg13468041                                                                              | 0.41702008  | 0.307877383 | 0.230839191 | -0.186180889 | 7.41E-13 | 1.04E-10 |
| UTR3 | CXCR1    | 2  | 219028181                                               | 1 | cg09905973                                                                              | 0.57586265  | 0.516595767 | 0.418598023 | -0.157264627 | 4.06E-07 | 2.95E-06 |
| UTR3 | CYB5D2   | 17 | 4060650                                                 | 1 | cg15741124                                                                              | 0.56388696  | 0.441718928 | 0.371963914 | -0.191923046 | 4.63E-11 | 1.72E-09 |
| UTR3 | DAB1     | 1  | 57470853                                                | 1 | cg01421140                                                                              | 0.501780055 | 0.351612833 | 0.254225914 | -0.247554141 | 9.25E-13 | 1.18E-10 |
| UTR3 | DAPP1    | 4  | 100790361                                               | 1 | cg12001078                                                                              | 0.792394045 | 0.717374578 | 0.6416928   | -0.150701245 | 9.65E-06 | 4.83E-05 |

|      |         |    |                                                       |   |                                                                   |             |             |             |              |          |             |
|------|---------|----|-------------------------------------------------------|---|-------------------------------------------------------------------|-------------|-------------|-------------|--------------|----------|-------------|
| UTR3 | DCAF4L2 | 8  | 88884156/88884985                                     | 2 | cg13008331/cg15707869                                             | 0.539520485 | 0.451251525 | 0.377598298 | -0.161922187 | 4.88E-09 | 6.47E-08    |
| UTR3 | DCDC2B  | 1  | 32681593                                              | 1 | cg06909646                                                        | 0.527690135 | 0.429460994 | 0.362153609 | -0.165536526 | 1.33E-09 | 2.14E-08    |
| UTR3 | DCHS2   | 4  | 155244316                                             | 1 | cg03842933                                                        | 0.58072848  | 0.458519239 | 0.343800218 | -0.236928262 | 1.07E-08 | 1.27E-07    |
| UTR3 | DCP2    | 5  | 112356289                                             | 1 | cg10837404                                                        | 0.83586094  | 0.694385061 | 0.548579195 | -0.287281745 | 1.37E-08 | 1.58E-07    |
| UTR3 | DDI1    | 11 | 103908787                                             | 1 | cg25859489                                                        | 0.856011715 | 0.774900711 | 0.635912295 | -0.22009942  | 6.22E-08 | 5.76E-07    |
| UTR3 | DDX51   | 12 | 132622514                                             | 1 | cg21131424                                                        | 0.801661825 | 0.687279917 | 0.612083855 | -0.18957797  | 5.19E-08 | 4.93E-07    |
| UTR3 | DEFB110 | 6  | 49986643                                              | 1 | cg19765351                                                        | 0.765906165 | 0.668897244 | 0.574276618 | -0.191629547 | 3.91E-05 | 0.0001691   |
| UTR3 | DEFB119 | 20 | 29965177                                              | 1 | cg07594472                                                        | 0.658123905 | 0.560924528 | 0.454900241 | -0.203223664 | 1.47E-05 | 7.04E-05    |
| UTR3 | DENND5A | 11 | 9160869                                               | 1 | cg19450302                                                        | 0.57565416  | 0.458060761 | 0.363100355 | -0.212553805 | 3.98E-12 | 3.25E-10    |
| UTR3 | DENND5B | 12 | 31538503                                              | 1 | cg00182053                                                        | 0.852821865 | 0.746444794 | 0.583098873 | -0.269722992 | 6.16E-10 | 1.13E-08    |
| UTR3 | DFNA5   | 7  | 24738572                                              | 1 | cg17790129                                                        | 0.8416488   | 0.744626211 | 0.658500932 | -0.183147868 | 1.43E-06 | 8.85E-06    |
| UTR3 | DGKH    | 13 | 42803600                                              | 1 | cg19307180                                                        | 0.64371907  | 0.542490233 | 0.467362936 | -0.176356134 | 1.15E-12 | 1.36E-10    |
| UTR3 | DGKI    | 7  | 137075954                                             | 1 | cg21146652                                                        | 0.70149302  | 0.601263183 | 0.53968905  | -0.16180397  | 1.43E-07 | 1.19E-06    |
| UTR3 | DIO2    | 14 | 80668655                                              | 1 | cg14293892                                                        | 0.601002125 | 0.509155211 | 0.411929086 | -0.189073039 | 1.56E-06 | 9.56E-06    |
| UTR3 | DIRC1   | 2  | 189599296                                             | 1 | cg26387064                                                        | 0.51815818  | 0.382614578 | 0.262043336 | -0.256114844 | 9.33E-12 | 5.60E-10    |
| UTR3 | DKK3    | 11 | 11984899                                              | 1 | cg26235273                                                        | 0.494295965 | 0.39256235  | 0.331494509 | -0.162801456 | 9.82E-11 | 2.76E-09    |
| UTR3 | DKKL1   | 19 | 49878296                                              | 1 | cg04309404                                                        | 0.794934795 | 0.699702622 | 0.585434591 | -0.209500204 | 1.53E-08 | 1.71E-07    |
| UTR3 | DLG2    | 11 | 83167314/83169193                                     | 2 | cg23791672/cg26449294                                             | 0.68391667  | 0.591936442 | 0.513037457 | -0.170879213 | 5.13E-12 | 3.88E-10    |
| UTR3 | DMRTA2  | 1  | 50884242/50883329/50883394                            | 3 | cg21774338/cg22711792/cg23097402                                  | 0.28725513  | 0.36524962  | 0.578860173 | 0.291605043  | 7.57E-07 | 5.06E-06    |
| UTR3 | DMRTB1  | 1  | 53932577                                              | 1 | cg15962336                                                        | 0.731929295 | 0.671436244 | 0.567648523 | -0.164280772 | 9.56E-05 | 0.000374856 |
| UTR3 | DNAJC15 | 13 | 43682146                                              | 1 | cg22318792                                                        | 0.85943771  | 0.762210511 | 0.692338782 | -0.167098928 | 1.48E-08 | 1.67E-07    |
| UTR3 | DNAJC5B | 8  | 67012327                                              | 1 | cg14928319                                                        | 0.44775702  | 0.335352706 | 0.267571659 | -0.180185361 | 5.83E-12 | 4.19E-10    |
| UTR3 | DNAJC7  | 17 | 40128637                                              | 1 | cg03593057                                                        | 0.324213295 | 0.438598261 | 0.496021845 | 0.17180855   | 2.11E-06 | 1.25E-05    |
| UTR3 | DNTT    | 10 | 98098271                                              | 1 | cg13444670                                                        | 0.713757315 | 0.649293511 | 0.483406882 | -0.230350433 | 3.35E-07 | 2.49E-06    |
| UTR3 | DOC2A   | 16 | 30017470/30016874                                     | 2 | cg08078586/cg09245872                                             | 0.611879845 | 0.525898778 | 0.445276293 | -0.166603552 | 4.37E-09 | 5.89E-08    |
| UTR3 | DOCK2   | 5  | 169510081                                             | 1 | cg09175734                                                        | 0.637470355 | 0.46170475  | 0.335555305 | -0.30191505  | 2.42E-13 | 5.50E-11    |
| UTR3 | DOLPP1  | 9  | 131851856                                             | 1 | cg14126328                                                        | 0.83625589  | 0.7636646   | 0.686154932 | -0.150100958 | 2.07E-07 | 1.64E-06    |
| UTR3 | DPCR1   | 6  | 30920956/30921592/30921757/30921007/30920907/30921630 | 6 | cg02818451/cg11485823/cg11554728/cg13871708/cg18796319/cg18964706 | 0.506285125 | 0.425013753 | 0.347263682 | -0.159021443 | 1.83E-08 | 2.00E-07    |
| UTR3 | DPPA5   | 6  | 74063014                                              | 1 | cg07464621                                                        | 0.758456805 | 0.669273656 | 0.551647977 | -0.206808828 | 8.73E-07 | 5.70E-06    |

|      |          |    |                                                                                                                                     |    |                                                                                                                                                                 |             |             |             |              |             |             |
|------|----------|----|-------------------------------------------------------------------------------------------------------------------------------------|----|-----------------------------------------------------------------------------------------------------------------------------------------------------------------|-------------|-------------|-------------|--------------|-------------|-------------|
| UTR3 | DUSP13   | 10 | 76859383/7685753<br>0/76859441/768592<br>06/76854201/76859<br>295/76859248/7686<br>0346/76860251/768<br>59323/76860035/76<br>859350 | 12 | cg04369919/cg10353<br>925/cg10522115/cg1<br>0963664/cg11612555<br>/cg11709896/cg1225<br>6803/cg16221975/cg<br>17292610/cg1953274<br>2/cg19591573/cg246<br>34577 | 0.605509274 | 0.53316533  | 0.453687999 | -0.151821276 | 3.76E-12    | 3.12E-10    |
| UTR3 | DYNLL1   | 12 | 120936243                                                                                                                           | 1  | cg23974249                                                                                                                                                      | 0.515574245 | 0.4245887   | 0.339232186 | -0.176342059 | 1.25E-10    | 3.23E-09    |
| UTR3 | EBF1     | 5  | 158125970                                                                                                                           | 1  | cg16394305                                                                                                                                                      | 0.65559294  | 0.535946711 | 0.382240991 | -0.273351949 | 5.10E-11    | 1.83E-09    |
| UTR3 | ECH1     | 19 | 39306244                                                                                                                            | 1  | cg12028674                                                                                                                                                      | 0.537122755 | 0.407828261 | 0.296433405 | -0.24068935  | 7.83E-10    | 1.36E-08    |
| UTR3 | ECM1     | 1  | 150486261                                                                                                                           | 1  | cg00175150                                                                                                                                                      | 0.651042425 | 0.545232422 | 0.451020564 | -0.200021861 | 1.29E-08    | 1.50E-07    |
| UTR3 | EDNRA    | 4  | 148465429                                                                                                                           | 1  | cg03573792                                                                                                                                                      | 0.664956465 | 0.514164483 | 0.458468332 | -0.206488133 | 4.22E-08    | 4.10E-07    |
| UTR3 | EEF1A2   | 20 | 62119492                                                                                                                            | 1  | cg26186239                                                                                                                                                      | 0.38874984  | 0.487190211 | 0.579219764 | 0.190469924  | 1.13E-06    | 7.18E-06    |
| UTR3 | EFHD1    | 2  | 233547150                                                                                                                           | 1  | cg11593908                                                                                                                                                      | 0.775196615 | 0.72410185  | 0.594341027 | -0.180855588 | 8.34E-05    | 0.000331464 |
| UTR3 | EHD2     | 19 | 48246266                                                                                                                            | 1  | cg01559302                                                                                                                                                      | 0.517371465 | 0.433027206 | 0.352763427 | -0.164608038 | 1.85E-11    | 8.94E-10    |
| UTR3 | EIF4EBP2 | 10 | 72185663                                                                                                                            | 1  | cg05523877                                                                                                                                                      | 0.693589435 | 0.560137044 | 0.481461823 | -0.212127612 | 2.70E-11    | 1.14E-09    |
| UTR3 | ELF3     | 1  | 201985958/201984<br>631                                                                                                             | 2  | cg09262245/cg11802<br>442                                                                                                                                       | 0.47771739  | 0.367612086 | 0.289984595 | -0.187732795 | 3.61E-11    | 1.43E-09    |
| UTR3 | ELFN1    | 7  | 1787194/1786735/1<br>787310/1787371                                                                                                 | 4  | cg01310330/cg02691<br>362/cg15703970/cg2<br>2104371                                                                                                             | 0.769912815 | 0.730319413 | 0.617637764 | -0.152275051 | 6.29E-10    | 1.15E-08    |
| UTR3 | ELFN2    | 22 | 37765272/3776891<br>5                                                                                                               | 2  | cg14378259/cg27107<br>094                                                                                                                                       | 0.74699482  | 0.642178028 | 0.570214123 | -0.176780697 | 4.39E-09    | 5.91E-08    |
| UTR3 | ELK4     | 1  | 205585639                                                                                                                           | 1  | cg04105597                                                                                                                                                      | 0.68138763  | 0.518637028 | 0.415228641 | -0.266158989 | 6.63E-11    | 2.11E-09    |
| UTR3 | ELOVL2   | 6  | 10981184                                                                                                                            | 1  | cg20462795                                                                                                                                                      | 0.66241619  | 0.529885233 | 0.423678795 | -0.238737395 | 6.62E-07    | 4.49E-06    |
| UTR3 | EMX1     | 2  | 73161954                                                                                                                            | 1  | cg13656408                                                                                                                                                      | 0.578524215 | 0.484855806 | 0.375815318 | -0.202708897 | 7.82E-10    | 1.36E-08    |
| UTR3 | EMX2     | 10 | 119307769/119307<br>931/119307692                                                                                                   | 3  | cg13630043/cg17320<br>707/cg19925204                                                                                                                            | 0.20821151  | 0.251114512 | 0.409820419 | 0.201608908  | 1.41E-06    | 8.75E-06    |
| UTR3 | EN1      | 2  | 119600348/119600<br>002/119599819/119<br>599748/119600408                                                                           | 5  | cg15888290/cg16794<br>506/cg21215767/cg2<br>1811143/cg22970357                                                                                                  | 0.23262711  | 0.297321828 | 0.42795329  | 0.19532618   | 1.34E-05    | 6.50E-05    |
| UTR3 | ENPP1    | 6  | 132216033                                                                                                                           | 1  | cg18796704                                                                                                                                                      | 0.563352985 | 0.434267872 | 0.341923232 | -0.221429753 | 1.55E-11    | 7.97E-10    |
| UTR3 | ENPP6    | 4  | 185012068                                                                                                                           | 1  | cg08334726                                                                                                                                                      | 0.678058885 | 0.603845467 | 0.46766505  | -0.210393835 | 4.01E-06    | 2.22E-05    |
| UTR3 | ENTHD1   | 22 | 40139626                                                                                                                            | 1  | cg11757326                                                                                                                                                      | 0.792336605 | 0.769785883 | 0.641580127 | -0.150756478 | 0.001365912 | 0.004065869 |
| UTR3 | EPHA8    | 1  | 22929080                                                                                                                            | 1  | cg10948827                                                                                                                                                      | 0.500337725 | 0.412532017 | 0.321810932 | -0.178526793 | 5.68E-11    | 1.93E-09    |
| UTR3 | EPHB4    | 7  | 100400274                                                                                                                           | 1  | cg22493616                                                                                                                                                      | 0.578426675 | 0.486434267 | 0.387014936 | -0.191411739 | 8.22E-11    | 2.43E-09    |

|      |         |    |                                         |   |                                             |             |             |             |              |             |             |
|------|---------|----|-----------------------------------------|---|---------------------------------------------|-------------|-------------|-------------|--------------|-------------|-------------|
| UTR3 | EPS8L1  | 19 | 55599029                                | 1 | cg10016788                                  | 0.384508685 | 0.510922939 | 0.666173845 | 0.28166516   | 7.66E-08    | 6.89E-07    |
| UTR3 | EPYC    | 12 | 91357909                                | 1 | cg19537969                                  | 0.643523905 | 0.575862267 | 0.483298805 | -0.1602251   | 3.04E-06    | 1.74E-05    |
| UTR3 | ESM1    | 5  | 54275155                                | 1 | cg00992687                                  | 0.718398305 | 0.596335983 | 0.464562891 | -0.253835414 | 1.49E-11    | 7.78E-10    |
| UTR3 | ESRRB   | 14 | 76967670                                | 1 | cg11763914                                  | 0.567960305 | 0.457641139 | 0.354765068 | -0.213195237 | 1.30E-07    | 1.09E-06    |
| UTR3 | EWSR1   | 22 | 29686496                                | 1 | cg11942221                                  | 0.79697509  | 0.713640467 | 0.638429677 | -0.158545413 | 5.63E-06    | 2.99E-05    |
| UTR3 | EYA4    | 6  | 133851427/133851460/133851542           | 3 | cg07817705/cg09649901/cg10782703            | 0.76600718  | 0.667307546 | 0.607034074 | -0.158973106 | 8.11E-11    | 2.42E-09    |
| UTR3 | F2R     | 5  | 76029522                                | 1 | cg01005365                                  | 0.642821665 | 0.508404467 | 0.389723736 | -0.253097929 | 2.37E-11    | 1.05E-09    |
| UTR3 | FAIM3   | 1  | 207077339                               | 1 | cg22671342                                  | 0.80168361  | 0.731530422 | 0.557446668 | -0.244236942 | 1.34E-06    | 8.36E-06    |
| UTR3 | FAM104A | 17 | 71204820                                | 1 | cg21700339                                  | 0.817183085 | 0.750012333 | 0.632379182 | -0.184803903 | 7.73E-09    | 9.55E-08    |
| UTR3 | FAM113B | 12 | 47630263                                | 1 | cg06547285                                  | 0.68285749  | 0.604956894 | 0.519730373 | -0.163127117 | 4.87E-06    | 2.63E-05    |
| UTR3 | FAM126A | 7  | 22982162                                | 1 | cg27229764                                  | 0.83985201  | 0.644167483 | 0.495510705 | -0.344341305 | 1.07E-10    | 2.87E-09    |
| UTR3 | FAM12A  | 14 | 21216325                                | 1 | cg19906534                                  | 0.711316055 | 0.583779889 | 0.524257905 | -0.18705815  | 2.18E-08    | 2.33E-07    |
| UTR3 | FAM13C  | 10 | 61007196                                | 1 | cg07625992                                  | 0.770272225 | 0.789121933 | 0.617386782 | -0.152885443 | 0.001374368 | 0.004082704 |
| UTR3 | FAM150A | 8  | 53450729                                | 1 | cg07055311                                  | 0.702819595 | 0.619731756 | 0.529788509 | -0.173031086 | 7.99E-06    | 4.08E-05    |
| UTR3 | FAM153B | 5  | 175541958                               | 1 | cg08252384                                  | 0.66048473  | 0.504976317 | 0.3864653   | -0.27401943  | 1.32E-14    | 7.46E-12    |
| UTR3 | FAM158A | 14 | 24608199                                | 1 | cg20933586                                  | 0.818297005 | 0.725956528 | 0.654738491 | -0.163558514 | 6.06E-08    | 5.62E-07    |
| UTR3 | FAM169B | 15 | 98982463                                | 1 | cg18576057                                  | 0.571798675 | 0.476288578 | 0.33510155  | -0.236697125 | 1.93E-11    | 9.25E-10    |
| UTR3 | FAM177B | 1  | 222923875                               | 1 | cg24666355                                  | 0.693060795 | 0.573116061 | 0.522239505 | -0.17082129  | 2.82E-10    | 6.08E-09    |
| UTR3 | FAM181A | 14 | 94395516                                | 1 | cg18857951                                  | 0.731475115 | 0.559816233 | 0.464809332 | -0.266665783 | 9.54E-12    | 5.69E-10    |
| UTR3 | FAM19A2 | 12 | 62102663                                | 1 | cg10081664                                  | 0.804826995 | 0.744657072 | 0.6483451   | -0.156481895 | 7.91E-06    | 4.04E-05    |
| UTR3 | FAM19A5 | 22 | 49146166/49147023/49146376/49146584     | 4 | cg00373397/cg05532594/cg14432153/cg14596108 | 0.718646195 | 0.618306983 | 0.565055377 | -0.153590818 | 2.96E-13    | 5.74E-11    |
| UTR3 | FAM26D  | 6  | 116879492                               | 1 | cg25351588                                  | 0.729955935 | 0.512860772 | 0.382538236 | -0.347417699 | 6.93E-15    | 7.46E-12    |
| UTR3 | FAM26E  | 6  | 116839146                               | 1 | cg04312119                                  | 0.6660065   | 0.562379411 | 0.406034514 | -0.259971986 | 6.58E-11    | 2.10E-09    |
| UTR3 | FAM43A  | 3  | 194408901/194408845/194408965/194409431 | 4 | cg00352417/cg09652652/cg10623840/cg11740416 | 0.26215094  | 0.408936706 | 0.452273838 | 0.190122898  | 4.83E-05    | 0.000203738 |
| UTR3 | FAM59B  | 2  | 26411705                                | 1 | cg07902785                                  | 0.674212345 | 0.564079767 | 0.472085691 | -0.202126654 | 3.41E-12    | 2.95E-10    |
| UTR3 | FAM5B   | 1  | 177251261                               | 1 | cg18766795                                  | 0.57424316  | 0.476150889 | 0.390396818 | -0.183846342 | 4.64E-09    | 6.20E-08    |
| UTR3 | FAM71C  | 12 | 100043668                               | 1 | cg03657350                                  | 0.56038941  | 0.443812117 | 0.390348264 | -0.170041146 | 5.01E-07    | 3.58E-06    |
| UTR3 | FAM71E1 | 19 | 50970203                                | 1 | cg00748226                                  | 0.39930922  | 0.3096889   | 0.245594759 | -0.153714461 | 3.75E-11    | 1.47E-09    |
| UTR3 | FAM78A  | 9  | 134135008/134135934                     | 2 | cg00524964/cg14424770                       | 0.794867283 | 0.693502653 | 0.602830959 | -0.192036323 | 6.73E-10    | 1.21E-08    |
| UTR3 | FAM78B  | 1  | 166039444                               | 1 | cg21908886                                  | 0.60072842  | 0.4828818   | 0.368567059 | -0.232161361 | 1.29E-10    | 3.32E-09    |
| UTR3 | FAM92B  | 16 | 85132373                                | 1 | cg02853355                                  | 0.748393785 | 0.662338694 | 0.586325368 | -0.162068417 | 5.05E-07    | 3.60E-06    |

|      |          |    |                                                                                         |   |                                                                                                         |             |             |             |              |             |             |
|------|----------|----|-----------------------------------------------------------------------------------------|---|---------------------------------------------------------------------------------------------------------|-------------|-------------|-------------|--------------|-------------|-------------|
| UTR3 | FANCL    | 2  | 58386677                                                                                | 1 | cg00869533                                                                                              | 0.72031767  | 0.625852844 | 0.554663109 | -0.165654561 | 4.67E-10    | 9.02E-09    |
| UTR3 | FBLN1    | 22 | 45996347/4595920<br>2/45961452                                                          | 3 | cg02163215/cg08414<br>809/cg10289926                                                                    | 0.655140405 | 0.550175789 | 0.4379626   | -0.217177805 | 1.63E-07    | 1.33E-06    |
| UTR3 | FBXL8    | 16 | 67198029                                                                                | 1 | cg06277900                                                                                              | 0.03345965  | 0.093408285 | 0.20158444  | 0.16812479   | 0.000124759 | 0.000473921 |
| UTR3 | FBXO17   | 19 | 39432669                                                                                | 1 | cg08643128                                                                                              | 0.593259145 | 0.526448839 | 0.443038727 | -0.150220418 | 1.64E-05    | 7.73E-05    |
| UTR3 | FCN3     | 1  | 27695677                                                                                | 1 | cg11529819                                                                                              | 0.528560735 | 0.412520183 | 0.359926764 | -0.168633971 | 1.74E-09    | 2.70E-08    |
| UTR3 | FCRLA    | 1  | 161684066                                                                               | 1 | cg11238082                                                                                              | 0.822824955 | 0.752089106 | 0.667346991 | -0.155477964 | 1.70E-07    | 1.37E-06    |
| UTR3 | FCRLB    | 1  | 161697574                                                                               | 1 | cg07385423                                                                                              | 0.362544925 | 0.458632356 | 0.549546064 | 0.187001139  | 1.07E-06    | 6.88E-06    |
| UTR3 | FERD3L   | 7  | 19184427                                                                                | 1 | cg02503874                                                                                              | 0.218303745 | 0.3473513   | 0.473612477 | 0.255308732  | 2.15E-08    | 2.31E-07    |
| UTR3 | FEZF2    | 3  | 62355505/6235544<br>3/62355525                                                          | 3 | cg11178293/cg12378<br>187/cg18175809                                                                    | 0.449229198 | 0.524748917 | 0.687487177 | 0.23825798   | 5.01E-11    | 1.81E-09    |
| UTR3 | FGF9     | 13 | 22277315/2227592<br>5                                                                   | 2 | cg22356541/cg26585<br>320                                                                               | 0.779463995 | 0.748968917 | 0.591004314 | -0.188459681 | 0.000531471 | 0.001746531 |
| UTR3 | FIBIN    | 11 | 27017005                                                                                | 1 | cg20119891                                                                                              | 0.69863793  | 0.621167417 | 0.538131459 | -0.160506471 | 0.000185568 | 0.000676946 |
| UTR3 | FLI1     | 11 | 128681282/128682<br>689                                                                 | 2 | cg07486669/cg11609<br>631                                                                               | 0.835998915 | 0.730196511 | 0.63710583  | -0.198893085 | 7.11E-08    | 6.45E-07    |
| UTR3 | FLJ10357 | 14 | 21557638                                                                                | 1 | cg13093389                                                                                              | 0.433563755 | 0.347984867 | 0.252233077 | -0.181330678 | 7.60E-11    | 2.32E-09    |
| UTR3 | FLJ25006 | 17 | 26937650                                                                                | 1 | cg12560320                                                                                              | 0.74944403  | 0.622230394 | 0.536892841 | -0.212551189 | 2.15E-09    | 3.23E-08    |
| UTR3 | FLJ37543 | 5  | 61001539                                                                                | 1 | cg15930643                                                                                              | 0.545289075 | 0.485036861 | 0.345844118 | -0.199444957 | 1.26E-07    | 1.06E-06    |
| UTR3 | FLJ41603 | 5  | 149012102                                                                               | 1 | cg01772439                                                                                              | 0.52271914  | 0.37926915  | 0.299869986 | -0.222849154 | 5.49E-13    | 8.49E-11    |
| UTR3 | FLJ43860 | 8  | 142444018                                                                               | 1 | cg23647640                                                                                              | 0.62587901  | 0.522229072 | 0.408431477 | -0.217447533 | 1.20E-14    | 7.46E-12    |
| UTR3 | FMNL2    | 2  | 153504453                                                                               | 1 | cg12226948                                                                                              | 0.613968445 | 0.509929933 | 0.421226027 | -0.192742418 | 6.83E-08    | 6.22E-07    |
| UTR3 | FMOD     | 1  | 203311314                                                                               | 1 | cg26894354                                                                                              | 0.367178645 | 0.243190667 | 0.198562577 | -0.168616068 | 2.48E-11    | 1.08E-09    |
| UTR3 | FNDC1    | 6  | 159692484                                                                               | 1 | cg13181026                                                                                              | 0.726886705 | 0.618804239 | 0.507516609 | -0.219370096 | 7.68E-09    | 9.50E-08    |
| UTR3 | FOXC2    | 16 | 86602533/8660247<br>1                                                                   | 2 | cg03190266/cg26948<br>907                                                                               | 0.362344055 | 0.445014956 | 0.575122759 | 0.212778704  | 8.95E-06    | 4.52E-05    |
| UTR3 | FOXD3    | 1  | 63790202                                                                                | 1 | cg21836358                                                                                              | 0.439180485 | 0.485118322 | 0.589245014 | 0.150064529  | 9.40E-05    | 0.000369662 |
| UTR3 | FOXF1    | 16 | 86547530/8654738<br>6/86547544/865473<br>22/86547203/86546<br>785/86546979/8654<br>6938 | 8 | cg00551679/cg01243<br>371/cg02783918/cg0<br>4787888/cg06834912<br>/cg07056644/cg0933<br>8251/cg27453745 | 0.357489856 | 0.459747748 | 0.565244533 | 0.207754677  | 9.17E-07    | 5.97E-06    |
| UTR3 | FPR1     | 19 | 52249171                                                                                | 1 | cg17724366                                                                                              | 0.685523455 | 0.550598956 | 0.412818109 | -0.272705346 | 3.64E-10    | 7.50E-09    |
| UTR3 | FSHB     | 11 | 30255943                                                                                | 1 | cg13280803                                                                                              | 0.569894375 | 0.459372722 | 0.363608491 | -0.206285884 | 4.48E-08    | 4.33E-07    |
| UTR3 | FSTL4    | 5  | 132534569                                                                               | 1 | cg27038382                                                                                              | 0.587007545 | 0.512858583 | 0.393957323 | -0.193050222 | 3.42E-08    | 3.42E-07    |
| UTR3 | FTCD     | 21 | 47556798/4755629<br>0                                                                   | 2 | cg14268780/cg21230<br>535                                                                               | 0.57140378  | 0.470037722 | 0.362505255 | -0.208898525 | 2.42E-11    | 1.06E-09    |

|      |         |    |                                                           |   |                                                                |             |             |             |              |          |             |
|------|---------|----|-----------------------------------------------------------|---|----------------------------------------------------------------|-------------|-------------|-------------|--------------|----------|-------------|
| UTR3 | FUT4    | 11 | 94282491/9427891<br>2/94279068                            | 3 | cg02856190/cg10283<br>505/cg13300301                           | 0.522864862 | 0.418103174 | 0.334362005 | -0.188502857 | 5.37E-11 | 1.88E-09    |
| UTR3 | FXC1    | 11 | 6505071/6504366/6<br>504311/6503801                       | 4 | cg02796744/cg19461<br>880/cg21750233/cg2<br>4744697            | 0.736319524 | 0.668920953 | 0.559092325 | -0.177227199 | 2.16E-06 | 1.28E-05    |
| UTR3 | FZD5    | 2  | 208629716/208627<br>796/208631684/208<br>631081/208631259 | 5 | cg01383128/cg01574<br>741/cg15714846/cg1<br>9744498/cg19957162 | 0.499945375 | 0.393288659 | 0.32392232  | -0.176023055 | 1.61E-11 | 8.11E-10    |
| UTR3 | FZD9    | 7  | 72850442                                                  | 1 | cg09804496                                                     | 0.4738502   | 0.4056949   | 0.300895641 | -0.172954559 | 8.89E-10 | 1.52E-08    |
| UTR3 | GAB4    | 22 | 17443619                                                  | 1 | cg04561937                                                     | 0.692590555 | 0.561962828 | 0.457181718 | -0.235408837 | 6.58E-10 | 1.19E-08    |
| UTR3 | GABRG3  | 15 | 27778081/2777836<br>1                                     | 2 | cg09205438/cg09459<br>714                                      | 0.657252493 | 0.567116417 | 0.494667473 | -0.16258502  | 3.03E-09 | 4.34E-08    |
| UTR3 | GABRR1  | 6  | 89888334                                                  | 1 | cg06704469                                                     | 0.6795119   | 0.609759544 | 0.467889105 | -0.211622795 | 4.48E-07 | 3.23E-06    |
| UTR3 | GALNS   | 16 | 88880839/8888032<br>6                                     | 2 | cg07774081/cg07947<br>266                                      | 0.801448725 | 0.662117744 | 0.601679786 | -0.199768939 | 2.54E-09 | 3.72E-08    |
| UTR3 | GALNT14 | 2  | 31133547                                                  | 1 | cg10582371                                                     | 0.567094185 | 0.407295439 | 0.319374855 | -0.24771933  | 1.14E-10 | 3.03E-09    |
| UTR3 | GALNTL5 | 7  | 151716974                                                 | 1 | cg01662876                                                     | 0.66252006  | 0.586377156 | 0.456383764 | -0.206136296 | 3.47E-09 | 4.83E-08    |
| UTR3 | GAMT    | 19 | 1397305                                                   | 1 | cg03076130                                                     | 0.53456142  | 0.455096706 | 0.376107282 | -0.158454138 | 1.26E-10 | 3.24E-09    |
| UTR3 | GAP43   | 3  | 115440301                                                 | 1 | cg12146703                                                     | 0.81006068  | 0.706065717 | 0.64444565  | -0.16561503  | 1.31E-06 | 8.16E-06    |
| UTR3 | GAS2L2  | 17 | 34071861                                                  | 1 | cg17190117                                                     | 0.64903646  | 0.542702033 | 0.45122045  | -0.19781601  | 1.56E-08 | 1.74E-07    |
| UTR3 | GAS7    | 17 | 9819556                                                   | 1 | cg01236299                                                     | 0.677461515 | 0.546391144 | 0.417421977 | -0.260039538 | 8.78E-12 | 5.41E-10    |
| UTR3 | GATA4   | 8  | 11617305/1161679<br>8/11617293                            | 3 | cg01644798/cg15644<br>626/cg24387126                           | 0.535576443 | 0.465358269 | 0.376187398 | -0.159389045 | 4.11E-09 | 5.60E-08    |
| UTR3 | GBP6    | 1  | 89853364                                                  | 1 | cg24581183                                                     | 0.790512085 | 0.738534294 | 0.636737391 | -0.153774694 | 6.77E-05 | 0.000275013 |
| UTR3 | GC      | 4  | 72608149                                                  | 1 | cg04837494                                                     | 0.56248382  | 0.441710256 | 0.325871568 | -0.236612252 | 3.97E-10 | 7.93E-09    |
| UTR3 | GDF3    | 12 | 7842389                                                   | 1 | cg18607010                                                     | 0.81561887  | 0.737630328 | 0.612860659 | -0.202758211 | 4.98E-07 | 3.56E-06    |
| UTR3 | GEMIN7  | 19 | 45594670/4559449<br>3/45594410                            | 3 | cg03270332/cg08436<br>089/cg18383668                           | 0.517435248 | 0.444744219 | 0.35804318  | -0.159392068 | 2.02E-08 | 2.18E-07    |
| UTR3 | GFPT2   | 5  | 179728553                                                 | 1 | cg26918954                                                     | 0.687336895 | 0.585780728 | 0.423299977 | -0.264036918 | 4.94E-09 | 6.52E-08    |
| UTR3 | GFRA4   | 20 | 3640545                                                   | 1 | cg09309950                                                     | 0.805236475 | 0.685461756 | 0.618243764 | -0.186992711 | 9.26E-07 | 6.02E-06    |
| UTR3 | GFRAL   | 6  | 55267138                                                  | 1 | cg15756928                                                     | 0.77928246  | 0.6929783   | 0.565065773 | -0.214216687 | 1.31E-07 | 1.10E-06    |
| UTR3 | GGA1    | 22 | 38029478/3801333<br>3                                     | 2 | cg21268578/cg22511<br>321                                      | 0.41633256  | 0.527307811 | 0.597284609 | 0.180952049  | 1.50E-07 | 1.23E-06    |
| UTR3 | GHR     | 5  | 42720521                                                  | 1 | cg18304305                                                     | 0.629837335 | 0.449580439 | 0.387788564 | -0.242048771 | 6.20E-07 | 4.25E-06    |
| UTR3 | GIMAP1  | 7  | 150418017/150418<br>241                                   | 2 | cg11844315/cg23713<br>249                                      | 0.6269493   | 0.57887865  | 0.465591345 | -0.161357955 | 4.31E-05 | 0.000183858 |
| UTR3 | GIP     | 17 | 47035958                                                  | 1 | cg16167524                                                     | 0.45437836  | 0.365781261 | 0.283451841 | -0.170926519 | 5.88E-11 | 1.98E-09    |
| UTR3 | GJA9    | 1  | 39339986                                                  | 1 | cg01562897                                                     | 0.667237225 | 0.550578011 | 0.490785718 | -0.176451507 | 2.81E-07 | 2.14E-06    |

|      |         |    |                                                                         |   |                                                                                                    |             |             |             |              |          |          |
|------|---------|----|-------------------------------------------------------------------------|---|----------------------------------------------------------------------------------------------------|-------------|-------------|-------------|--------------|----------|----------|
| UTR3 | GJB6    | 13 | 20796216                                                                | 1 | cg03568673                                                                                         | 0.620598725 | 0.480678711 | 0.357646886 | -0.262951839 | 2.75E-12 | 2.48E-10 |
| UTR3 | GK2     | 4  | 80327523                                                                | 1 | cg17197065                                                                                         | 0.520917465 | 0.397235117 | 0.302443518 | -0.218473947 | 5.12E-09 | 6.72E-08 |
| UTR3 | GLI1    | 12 | 57865987                                                                | 1 | cg09071093                                                                                         | 0.388413875 | 0.278451778 | 0.213209182 | -0.175204693 | 2.14E-11 | 9.89E-10 |
| UTR3 | GLYATL2 | 11 | 58601627                                                                | 1 | cg21535655                                                                                         | 0.807504265 | 0.695574106 | 0.609626059 | -0.197878206 | 7.55E-08 | 6.81E-07 |
| UTR3 | GNG7    | 19 | 2514622/2513356/2513687/2512999/2513436/2513302/2511707/2511263/2511475 | 9 | cg04158792/cg05456713/cg08626004/cg12211091/cg13701180/cg19293162/cg24299136/cg25556841/cg27181295 | 0.829295033 | 0.727728338 | 0.621307328 | -0.207987704 | 2.84E-11 | 1.18E-09 |
| UTR3 | GOLGA6B | 15 | 72958737                                                                | 1 | cg04899153                                                                                         | 0.59450021  | 0.529191222 | 0.440586486 | -0.153913724 | 8.62E-11 | 2.48E-09 |
| UTR3 | GOLGA6D | 15 | 75587027                                                                | 1 | cg00218707                                                                                         | 0.693449245 | 0.636085483 | 0.505548268 | -0.187900977 | 2.42E-11 | 1.06E-09 |
| UTR3 | GP6     | 19 | 55526208                                                                | 1 | cg27154418                                                                                         | 0.780080255 | 0.607387206 | 0.41956515  | -0.360515105 | 1.46E-07 | 1.21E-06 |
| UTR3 | GPC5    | 13 | 93518730                                                                | 1 | cg16437048                                                                                         | 0.70098535  | 0.565797717 | 0.482239086 | -0.218746264 | 1.84E-06 | 1.12E-05 |
| UTR3 | GPC6    | 13 | 95055638                                                                | 1 | cg23445525                                                                                         | 0.65325716  | 0.543046217 | 0.411580836 | -0.241676324 | 4.18E-11 | 1.59E-09 |
| UTR3 | GPR108  | 19 | 6730061                                                                 | 1 | cg21986821                                                                                         | 0.68506961  | 0.554659461 | 0.449381755 | -0.235687855 | 2.19E-11 | 9.99E-10 |
| UTR3 | GPR114  | 16 | 57610170                                                                | 1 | cg05686118                                                                                         | 0.6629469   | 0.565690439 | 0.473101764 | -0.189845136 | 1.12E-08 | 1.32E-07 |
| UTR3 | GPR26   | 10 | 125453638/125448352/125454278/125454530                                 | 4 | cg09616721/cg13557752/cg14039479/cg23545828                                                        | 0.630450795 | 0.542710531 | 0.43110465  | -0.199346145 | 5.99E-07 | 4.18E-06 |
| UTR3 | GPR4    | 19 | 46094030                                                                | 1 | cg15173319                                                                                         | 0.588234765 | 0.509642228 | 0.432966645 | -0.15526812  | 4.48E-06 | 2.45E-05 |
| UTR3 | GPR45   | 2  | 105859806                                                               | 1 | cg03997393                                                                                         | 0.768511135 | 0.69813085  | 0.602309723 | -0.166201412 | 6.02E-07 | 4.20E-06 |
| UTR3 | GPR78   | 4  | 8589313                                                                 | 1 | cg02847185                                                                                         | 0.71327113  | 0.584407756 | 0.449716941 | -0.263554189 | 2.19E-08 | 2.34E-07 |
| UTR3 | GPR85   | 7  | 112720816                                                               | 1 | cg03177735                                                                                         | 0.769539105 | 0.683404133 | 0.591156045 | -0.17838306  | 2.99E-06 | 1.72E-05 |
| UTR3 | GPR98   | 5  | 90459841                                                                | 1 | cg07706111                                                                                         | 0.775706465 | 0.662210856 | 0.578939364 | -0.196767101 | 1.12E-08 | 1.31E-07 |
| UTR3 | GPX2    | 14 | 65405931                                                                | 1 | cg14947787                                                                                         | 0.52773459  | 0.396178722 | 0.306150059 | -0.221584531 | 2.68E-11 | 1.13E-09 |
| UTR3 | GRIA1   | 5  | 153192843                                                               | 1 | cg20668321                                                                                         | 0.688436055 | 0.594384461 | 0.4562353   | -0.232200755 | 1.20E-05 | 5.88E-05 |
| UTR3 | GRID1   | 10 | 87360396                                                                | 1 | cg27317356                                                                                         | 0.428314085 | 0.330057683 | 0.243350536 | -0.184963549 | 1.30E-12 | 1.47E-10 |
| UTR3 | GRIN2D  | 19 | 48947560/48947631/48947572/48947578/48948005                            | 5 | cg04988514/cg14594362/cg16875863/cg2242216/cg26362197                                              | 0.337209907 | 0.448778694 | 0.62741754  | 0.290207633  | 3.16E-09 | 4.47E-08 |
| UTR3 | GRM2    | 3  | 51752143                                                                | 1 | cg11727252                                                                                         | 0.77556587  | 0.611487583 | 0.5510914   | -0.22447447  | 3.17E-10 | 6.68E-09 |
| UTR3 | GRM5    | 11 | 88241594/88238963/88240817                                              | 3 | cg02647408/cg04367107/cg25520422                                                                   | 0.774452558 | 0.708243442 | 0.593620864 | -0.180831694 | 4.80E-06 | 2.60E-05 |



|      |         |    |                                                                                                    |    |                                                                                                                          |             |             |             |              |             |             |
|------|---------|----|----------------------------------------------------------------------------------------------------|----|--------------------------------------------------------------------------------------------------------------------------|-------------|-------------|-------------|--------------|-------------|-------------|
| UTR3 | GRM7    | 3  | 7755472/7742036/773492/7782210                                                                     | 4  | cg00586732/cg13054613/cg17219740/cg20936920                                                                              | 0.627616701 | 0.530606288 | 0.444872451 | -0.18274425  | 1.13E-08    | 1.33E-07    |
| UTR3 | GRPEL2  | 5  | 148733517                                                                                          | 1  | cg06560087                                                                                                               | 0.595196705 | 0.461151144 | 0.385033809 | -0.210162896 | 5.62E-12    | 4.11E-10    |
| UTR3 | GSC     | 14 | 95234822/95234658/95234826                                                                         | 3  | cg05142765/cg13073773/cg23695707                                                                                         | 0.226465008 | 0.258448255 | 0.462748754 | 0.236283746  | 3.67E-05    | 0.000159859 |
| UTR3 | GSTK1   | 7  | 142965938                                                                                          | 1  | cg03879613                                                                                                               | 0.520789815 | 0.430808678 | 0.352281395 | -0.16850842  | 5.73E-11    | 1.94E-09    |
| UTR3 | GSX1    | 13 | 28368087                                                                                           | 1  | cg21851351                                                                                                               | 0.380350495 | 0.489700006 | 0.650913655 | 0.27056316   | 1.02E-09    | 1.73E-08    |
| UTR3 | GTSF1   | 12 | 54851386                                                                                           | 1  | cg20676413                                                                                                               | 0.57207408  | 0.44665725  | 0.336129405 | -0.235944675 | 1.01E-10    | 2.80E-09    |
| UTR3 | GUCA2A  | 1  | 42628449                                                                                           | 1  | cg04701869                                                                                                               | 0.68453852  | 0.605533389 | 0.524841345 | -0.159697175 | 2.95E-09    | 4.23E-08    |
| UTR3 | GYPC    | 2  | 127453782                                                                                          | 1  | cg11611448                                                                                                               | 0.79602001  | 0.590340178 | 0.401720773 | -0.394299237 | 1.38E-13    | 3.88E-11    |
| UTR3 | GZMA    | 5  | 54406016                                                                                           | 1  | cg05648002                                                                                                               | 0.67577133  | 0.510632344 | 0.356100214 | -0.319671116 | 4.36E-15    | 7.46E-12    |
| UTR3 | HAO1    | 20 | 7863971                                                                                            | 1  | cg19862235                                                                                                               | 0.385423555 | 0.303144617 | 0.219343218 | -0.166080337 | 2.03E-10    | 4.76E-09    |
| UTR3 | HAPLN4  | 19 | 19367084/19366511                                                                                  | 2  | cg11781421/cg11971944                                                                                                    | 0.659483618 | 0.569136542 | 0.452436057 | -0.207047561 | 5.36E-11    | 1.88E-09    |
| UTR3 | HARS    | 5  | 140053663                                                                                          | 1  | cg15715507                                                                                                               | 0.631400235 | 0.535646289 | 0.458476173 | -0.172924062 | 9.55E-11    | 2.69E-09    |
| UTR3 | HAVCR2  | 5  | 156513860                                                                                          | 1  | cg18374914                                                                                                               | 0.633590665 | 0.542993178 | 0.428177764 | -0.205412901 | 5.02E-08    | 4.78E-07    |
| UTR3 | HBP1    | 7  | 106842512/106842632                                                                                | 2  | cg10840361/cg24556660                                                                                                    | 0.504900923 | 0.399028481 | 0.33026438  | -0.174636543 | 4.83E-11    | 1.76E-09    |
| UTR3 | HBZ     | 16 | 204474                                                                                             | 1  | cg02279719                                                                                                               | 0.205046045 | 0.199966012 | 0.363854455 | 0.15880841   | 0.001984347 | 0.005624612 |
| UTR3 | HCK     | 20 | 30689432                                                                                           | 1  | cg06614284                                                                                                               | 0.453769085 | 0.319431767 | 0.227233327 | -0.226535758 | 9.89E-15    | 7.46E-12    |
| UTR3 | HCN4    | 15 | 73613841                                                                                           | 1  | cg10942561                                                                                                               | 0.7729768   | 0.665639744 | 0.565309127 | -0.207667673 | 5.57E-09    | 7.26E-08    |
| UTR3 | HECW1   | 7  | 43601539                                                                                           | 1  | cg00802510                                                                                                               | 0.61021526  | 0.473671694 | 0.347497114 | -0.262718146 | 3.43E-11    | 1.37E-09    |
| UTR3 | HEMGN   | 9  | 100689349                                                                                          | 1  | cg14566819                                                                                                               | 0.512526425 | 0.415129344 | 0.284867109 | -0.227659316 | 6.44E-11    | 2.08E-09    |
| UTR3 | HEPN1   | 11 | 124790365                                                                                          | 1  | cg22871233                                                                                                               | 0.86396429  | 0.800697256 | 0.701462732 | -0.162501558 | 1.43E-05    | 6.87E-05    |
| UTR3 | HFE2    | 1  | 145417038                                                                                          | 1  | cg18369654                                                                                                               | 0.6426173   | 0.565228011 | 0.474320168 | -0.168297132 | 2.99E-08    | 3.06E-07    |
| UTR3 | HGF     | 7  | 81381353/81372100                                                                                  | 2  | cg18944653/cg23269320                                                                                                    | 0.6702799   | 0.609693986 | 0.497570584 | -0.172709316 | 7.72E-07    | 5.13E-06    |
| UTR3 | HLA-DOA | 6  | 32974517/32974479/32974122/32972902/32972093/32973717/32972970/32972157/32973306/32972492/32972989 | 11 | cg06788504/cg07699648/cg09132634/cg10297701/cg11527772/cg14671277/cg18824596/cg22118369/cg25535873/cg26175846/cg26306056 | 0.708494918 | 0.610925098 | 0.513618819 | -0.194876099 | 2.59E-12    | 2.40E-10    |
| UTR3 | HMCN1   | 1  | 186159350                                                                                          | 1  | cg09411231                                                                                                               | 0.65509952  | 0.531562683 | 0.418838273 | -0.236261247 | 3.94E-07    | 2.87E-06    |
| UTR3 | HMP19   | 5  | 173535352                                                                                          | 1  | cg19431566                                                                                                               | 0.71502649  | 0.6073294   | 0.4851254   | -0.22990109  | 2.02E-09    | 3.06E-08    |

|      |          |    |                                                                                           |   |                                                                                                         |             |             |             |              |             |             |
|------|----------|----|-------------------------------------------------------------------------------------------|---|---------------------------------------------------------------------------------------------------------|-------------|-------------|-------------|--------------|-------------|-------------|
| UTR3 | HOXA3    | 7  | 27147206/2714626<br>2/27146237/271464<br>30/27145972/27147 8<br>513/27146445/2714<br>7084 |   | cg01175550/cg01964<br>852/cg03308399/cg0<br>5109569/cg12538674<br>/cg13240116/cg1421<br>6068/cg27539480 | 0.563694833 | 0.630829877 | 0.763252151 | 0.199557317  | 2.68E-09    | 3.90E-08    |
| UTR3 | HOXB9    | 17 | 46699073/4669915<br>5/46698881/466989 5<br>73/46698598                                    |   | cg04917446/cg12057<br>127/cg15117739/cg2<br>3245942/cg25078137                                          | 0.578931189 | 0.449031508 | 0.341099134 | -0.237832055 | 5.81E-07    | 4.08E-06    |
| UTR3 | HOXC11   | 12 | 54369638/5436933<br>6/54369987/543695 4<br>14                                             |   | cg02384661/cg06708<br>937/cg08857479/cg2<br>3395715                                                     | 0.293750088 | 0.433826801 | 0.453710035 | 0.159959948  | 5.48E-06    | 2.92E-05    |
| UTR3 | HOXC13   | 12 | 54339653/5433916 3<br>7/54339288                                                          |   | cg03239552/cg04819<br>096/cg05771518                                                                    | 0.283762935 | 0.348560644 | 0.437201491 | 0.153438556  | 3.78E-07    | 2.77E-06    |
| UTR3 | HOXC5    | 12 | 54428592                                                                                  | 1 | cg05987823                                                                                              | 0.56356161  | 0.663961572 | 0.755658718 | 0.192097108  | 5.87E-12    | 4.19E-10    |
| UTR3 | HOXC9    | 12 | 54396990                                                                                  | 1 | cg22679316                                                                                              | 0.511116905 | 0.679663483 | 0.681937423 | 0.170820518  | 0.000191655 | 0.000696907 |
| UTR3 | HOXD10   | 2  | 176984634                                                                                 | 1 | cg06005169                                                                                              | 0.511829205 | 0.349056389 | 0.349526773 | -0.162302432 | 0.000122586 | 0.000466878 |
| UTR3 | HPCAL4   | 1  | 40146660                                                                                  | 1 | cg00036110                                                                                              | 0.528117505 | 0.388537689 | 0.295399841 | -0.232717664 | 6.42E-12    | 4.43E-10    |
| UTR3 | HRASLS5  | 11 | 63230511                                                                                  | 1 | cg04999435                                                                                              | 0.57101505  | 0.430893911 | 0.309875468 | -0.261139582 | 9.24E-13    | 1.18E-10    |
| UTR3 | HRH3     | 20 | 60791033                                                                                  | 1 | cg00418735                                                                                              | 0.629686335 | 0.545992772 | 0.464287068 | -0.165399267 | 6.72E-07    | 4.54E-06    |
| UTR3 | HS3ST3A1 | 17 | 13399070                                                                                  | 1 | cg27260984                                                                                              | 0.81198985  | 0.756759083 | 0.600862695 | -0.211127155 | 3.19E-05    | 0.000140943 |
| UTR3 | HSP90AB1 | 6  | 44221403                                                                                  | 1 | cg19091981                                                                                              | 0.5186358   | 0.377760811 | 0.301414827 | -0.217220973 | 5.44E-11    | 1.89E-09    |
| UTR3 | HSPB8    | 12 | 119632544                                                                                 | 1 | cg16425829                                                                                              | 0.53882094  | 0.452123811 | 0.358405686 | -0.180415254 | 3.40E-07    | 2.52E-06    |
| UTR3 | HTN1     | 4  | 70923371                                                                                  | 1 | cg16270018                                                                                              | 0.674315945 | 0.621824361 | 0.460186018 | -0.214129927 | 2.25E-06    | 1.33E-05    |
| UTR3 | HTR3A    | 11 | 113860607                                                                                 | 1 | cg20178075                                                                                              | 0.762484975 | 0.668723378 | 0.54763885  | -0.214846125 | 1.37E-06    | 8.50E-06    |
| UTR3 | IAPP     | 12 | 21531643                                                                                  | 1 | cg12127290                                                                                              | 0.651986365 | 0.57416675  | 0.460210405 | -0.19177596  | 2.33E-07    | 1.82E-06    |
| UTR3 | ICOS     | 2  | 204824513                                                                                 | 1 | cg17751550                                                                                              | 0.75262835  | 0.713681606 | 0.581573223 | -0.171055127 | 0.000266233 | 0.000939639 |
| UTR3 | IFFO1    | 12 | 6649349/6648770/6<br>648862                                                               | 3 | cg02410245/cg11053<br>466/cg17229929                                                                    | 0.508890283 | 0.4246969   | 0.357492974 | -0.151397309 | 1.04E-10    | 2.84E-09    |
| UTR3 | IFLTD1   | 12 | 25649090/2565619<br>4/25644389                                                            | 3 | cg06680863/cg11130<br>955/cg21254753                                                                    | 0.520388233 | 0.352889517 | 0.271136409 | -0.249251823 | 8.34E-12    | 5.32E-10    |
| UTR3 | IGFBP1   | 7  | 45932989                                                                                  | 1 | cg06200449                                                                                              | 0.789571655 | 0.733281061 | 0.634668373 | -0.154903282 | 0.000376833 | 0.00128597  |
| UTR3 | IGLL1    | 22 | 23915440/2391557<br>3                                                                     | 2 | cg00805441/cg25778<br>076                                                                               | 0.70402175  | 0.602328289 | 0.452638964 | -0.251382786 | 8.56E-11    | 2.48E-09    |
| UTR3 | IGSF11   | 3  | 118620082                                                                                 | 1 | cg09856271                                                                                              | 0.73168655  | 0.6545739   | 0.541285882 | -0.190400668 | 4.88E-05    | 0.000205494 |
| UTR3 | IL17A    | 6  | 52054186                                                                                  | 1 | cg05884768                                                                                              | 0.81988249  | 0.733557161 | 0.603682105 | -0.216200385 | 7.48E-06    | 3.84E-05    |
| UTR3 | IL18R1   | 2  | 103014454                                                                                 | 1 | cg20629735                                                                                              | 0.825654225 | 0.68068905  | 0.566933268 | -0.258720957 | 7.29E-10    | 1.29E-08    |

|      |          |    |                               |   |                                  |             |             |             |              |             |             |
|------|----------|----|-------------------------------|---|----------------------------------|-------------|-------------|-------------|--------------|-------------|-------------|
| UTR3 | IL1RAP   | 3  | 190374982/190366926           | 2 | cg19375583/cg20962955            | 0.61749919  | 0.496025183 | 0.3456051   | -0.27189409  | 6.54E-11    | 2.10E-09    |
| UTR3 | IL22     | 12 | 68642433                      | 1 | cg03694077                       | 0.825826325 | 0.751050461 | 0.549177714 | -0.276648611 | 1.06E-07    | 9.15E-07    |
| UTR3 | IL24     | 1  | 207077339                     | 1 | cg22671342                       | 0.80168361  | 0.731530422 | 0.557446668 | -0.244236942 | 1.34E-06    | 8.36E-06    |
| UTR3 | IL2RB    | 22 | 37523151                      | 1 | cg24509815                       | 0.38590457  | 0.282691722 | 0.227374441 | -0.158530129 | 2.94E-13    | 5.74E-11    |
| UTR3 | IL31     | 12 | 122656878                     | 1 | cg23253739                       | 0.70508545  | 0.604561411 | 0.554529514 | -0.150555936 | 0.00051009  | 0.001685494 |
| UTR3 | IL4R     | 16 | 27375732                      | 1 | cg05903710                       | 0.574244555 | 0.426972522 | 0.318751195 | -0.25549336  | 8.20E-13    | 1.12E-10    |
| UTR3 | INCA1    | 17 | 4891687/4891542               | 2 | cg11644815/cg14928057            | 0.20554477  | 0.318148389 | 0.358292545 | 0.152747775  | 0.000200325 | 0.000725078 |
| UTR3 | IQCA1    | 2  | 237233067                     | 1 | cg14035807                       | 0.641619045 | 0.554918011 | 0.435973645 | -0.2056454   | 5.06E-07    | 3.60E-06    |
| UTR3 | IRF4     | 6  | 408730                        | 1 | cg16478536                       | 0.673091255 | 0.510591667 | 0.359100409 | -0.313990846 | 7.00E-11    | 2.19E-09    |
| UTR3 | IRF7     | 11 | 612588                        | 1 | cg18477816                       | 0.656342095 | 0.565704439 | 0.490570923 | -0.165771172 | 2.62E-08    | 2.74E-07    |
| UTR3 | IRX1     | 5  | 3601357                       | 1 | cg09813610                       | 0.24163855  | 0.313139379 | 0.440883736 | 0.199245186  | 6.83E-08    | 6.22E-07    |
| UTR3 | IRX4     | 5  | 1877906                       | 1 | cg17838420                       | 0.489190195 | 0.564378506 | 0.698162859 | 0.208972664  | 1.26E-08    | 1.47E-07    |
| UTR3 | IRX5     | 16 | 54967786                      | 1 | cg07452217                       | 0.430253355 | 0.511959644 | 0.725156582 | 0.294903227  | 3.46E-08    | 3.44E-07    |
| UTR3 | ITGAL    | 16 | 30533458                      | 1 | cg02888243                       | 0.49989375  | 0.41460555  | 0.339206645 | -0.160687105 | 2.38E-11    | 1.05E-09    |
| UTR3 | ITIH3    | 3  | 52842806                      | 1 | cg14556868                       | 0.48263843  | 0.365942844 | 0.281247182 | -0.201391248 | 6.31E-11    | 2.05E-09    |
| UTR3 | KBTBD3   | 11 | 105923175/105922059           | 2 | cg26356242/cg26800786            | 0.810361953 | 0.740652183 | 0.647372557 | -0.162989396 | 3.94E-11    | 1.51E-09    |
| UTR3 | KCMF1    | 2  | 85281128                      | 1 | cg07002540                       | 0.549829665 | 0.414224472 | 0.336815795 | -0.21301387  | 1.95E-11    | 9.31E-10    |
| UTR3 | KCNA1    | 12 | 5024586                       | 1 | cg22669120                       | 0.456833075 | 0.318736772 | 0.231787859 | -0.225045216 | 3.85E-13    | 6.67E-11    |
| UTR3 | KCNH5    | 14 | 63174831/63179119             | 2 | cg16093173/cg20326674            | 0.458429415 | 0.343654139 | 0.26352435  | -0.194905065 | 7.67E-12    | 5.03E-10    |
| UTR3 | KCNJ1    | 11 | 128708512                     | 1 | cg22721851                       | 0.830890615 | 0.759916289 | 0.607408118 | -0.223482497 | 3.78E-06    | 2.10E-05    |
| UTR3 | KCNJ16   | 17 | 68131572                      | 1 | cg17746031                       | 0.634809215 | 0.554466894 | 0.469564955 | -0.16524426  | 1.96E-06    | 1.18E-05    |
| UTR3 | KCNJ3    | 2  | 155711998                     | 1 | cg04227743                       | 0.89152566  | 0.7555509   | 0.710135705 | -0.181389955 | 2.44E-05    | 0.00011172  |
| UTR3 | KCNK15   | 20 | 43379501                      | 1 | cg07046101                       | 0.40507243  | 0.27917015  | 0.210942386 | -0.194130044 | 1.04E-14    | 7.46E-12    |
| UTR3 | KCNK9    | 8  | 140629559/140627494/140630180 | 3 | cg05988964/cg14321373/cg24020826 | 0.743244908 | 0.668425339 | 0.57042465  | -0.172820258 | 2.12E-07    | 1.67E-06    |
| UTR3 | KCNMB1   | 5  | 169805583                     | 1 | cg16425489                       | 0.65433255  | 0.457229906 | 0.333462355 | -0.320870195 | 1.81E-14    | 8.81E-12    |
| UTR3 | KCNT1    | 9  | 138684093                     | 1 | cg06677048                       | 0.719923815 | 0.650782983 | 0.567577627 | -0.152346188 | 7.06E-06    | 3.65E-05    |
| UTR3 | KCNU1    | 8  | 36793457                      | 1 | cg05749559                       | 0.64251751  | 0.504223344 | 0.427103168 | -0.215414342 | 1.88E-08    | 2.05E-07    |
| UTR3 | KCP      | 7  | 128530129/128516960           | 2 | cg00139092/cg17511168            | 0.63436876  | 0.513724378 | 0.431646093 | -0.202722667 | 3.95E-12    | 3.25E-10    |
| UTR3 | KCTD7    | 7  | 66105984                      | 1 | cg07522403                       | 0.587084105 | 0.434704094 | 0.3336382   | -0.253445905 | 6.12E-11    | 2.01E-09    |
| UTR3 | KEL      | 7  | 142638303                     | 1 | cg14498745                       | 0.474326075 | 0.330781556 | 0.252260614 | -0.222065461 | 6.18E-12    | 4.35E-10    |
| UTR3 | KHDC1    | 6  | 73951145                      | 1 | cg07388171                       | 0.730898335 | 0.589748067 | 0.508045177 | -0.222853158 | 1.01E-10    | 2.81E-09    |
| UTR3 | KHDC1L   | 6  | 73933428                      | 1 | cg06485892                       | 0.55026717  | 0.409860056 | 0.295795727 | -0.254471443 | 8.31E-15    | 7.46E-12    |
| UTR3 | KIAA0182 | 16 | 85708039                      | 1 | cg04120520                       | 0.482592025 | 0.373766944 | 0.317987786 | -0.164604239 | 9.17E-09    | 1.11E-07    |

|      |           |    |                                     |   |                                                     |             |             |             |              |          |             |
|------|-----------|----|-------------------------------------|---|-----------------------------------------------------|-------------|-------------|-------------|--------------|----------|-------------|
| UTR3 | KIAA0247  | 14 | 70180751/7017877<br>1               | 2 | cg01570265/cg09869<br>130                           | 0.535664348 | 0.441863025 | 0.364101916 | -0.171562432 | 8.52E-12 | 5.34E-10    |
| UTR3 | KIAA0495  | 1  | 3659656/3659644/3<br>659702/3652931 | 4 | cg12417704/cg19903<br>298/cg23984080/cg2<br>4361048 | 0.784425733 | 0.709943736 | 0.614968466 | -0.169457267 | 3.19E-11 | 1.28E-09    |
| UTR3 | KIAA1486  | 2  | 226518461                           | 1 | cg03731588                                          | 0.786968595 | 0.56651525  | 0.408501177 | -0.378467418 | 1.44E-12 | 1.54E-10    |
| UTR3 | KIDINS220 | 2  | 8870227                             | 1 | cg26426395                                          | 0.81599487  | 0.672126689 | 0.497986095 | -0.318008775 | 8.96E-07 | 5.85E-06    |
| UTR3 | KIF2B     | 17 | 51902426                            | 1 | cg15844441                                          | 0.82809001  | 0.739533328 | 0.614003827 | -0.214086183 | 1.34E-06 | 8.35E-06    |
| UTR3 | KIR3DP1   | 19 | 55309528                            | 1 | cg19380156                                          | 0.5419285   | 0.431051678 | 0.284627395 | -0.257301105 | 6.82E-14 | 2.24E-11    |
| UTR3 | KIRREL2   | 19 | 36357700                            | 1 | cg22467594                                          | 0.7143387   | 0.628661617 | 0.469341177 | -0.244997523 | 5.32E-08 | 5.03E-07    |
| UTR3 | KIRREL3   | 11 | 126294215/126301<br>004             | 2 | cg08527161/cg09737<br>499                           | 0.532321035 | 0.422800211 | 0.327277059 | -0.205043976 | 9.92E-11 | 2.78E-09    |
| UTR3 | KLHL35    | 11 | 75133593                            | 1 | cg05327192                                          | 0.55257321  | 0.427094311 | 0.328218332 | -0.224354878 | 3.02E-10 | 6.44E-09    |
| UTR3 | KLK15     | 19 | 51328577                            | 1 | cg07577731                                          | 0.60091852  | 0.451617806 | 0.351085564 | -0.249832956 | 4.25E-13 | 7.12E-11    |
| UTR3 | KNG1      | 3  | 186462194/186460<br>384             | 2 | cg05769975/cg27376<br>355                           | 0.78525471  | 0.68198585  | 0.584153902 | -0.201100808 | 1.95E-10 | 4.61E-09    |
| UTR3 | KRBA1     | 7  | 149431265                           | 1 | cg21460729                                          | 0.64276954  | 0.513637917 | 0.377351205 | -0.265418335 | 1.01E-11 | 5.82E-10    |
| UTR3 | KRBA2     | 17 | 8272249                             | 1 | cg21463907                                          | 0.856332625 | 0.716364489 | 0.682361341 | -0.173971284 | 3.23E-08 | 3.26E-07    |
| UTR3 | KREMEN2   | 16 | 3018104/3018262                     | 2 | cg09660145/cg26229<br>224                           | 0.52625122  | 0.409738944 | 0.312099295 | -0.214151925 | 3.57E-12 | 3.04E-10    |
| UTR3 | KRT37     | 17 | 39577117                            | 1 | cg23388392                                          | 0.688627715 | 0.5754188   | 0.440495823 | -0.248131892 | 5.34E-07 | 3.78E-06    |
| UTR3 | KRT5      | 12 | 52908478                            | 1 | cg00028929                                          | 0.58837834  | 0.537542189 | 0.428127436 | -0.160250904 | 3.47E-05 | 0.000152125 |
| UTR3 | KRT74     | 12 | 52960529                            | 1 | cg10637292                                          | 0.47247762  | 0.368572783 | 0.286011905 | -0.186465715 | 1.01E-11 | 5.82E-10    |
| UTR3 | KRT76     | 12 | 53162093                            | 1 | cg10284006                                          | 0.57304022  | 0.440255006 | 0.307917577 | -0.265122643 | 4.58E-12 | 3.57E-10    |
| UTR3 | KRTAP10-1 | 21 | 45959142                            | 1 | cg17903229                                          | 0.46414623  | 0.348451517 | 0.299173286 | -0.164972944 | 2.59E-07 | 2.00E-06    |
| UTR3 | KRTAP15-1 | 21 | 31813075                            | 1 | cg16812893                                          | 0.59362799  | 0.440570944 | 0.334187759 | -0.259440231 | 3.58E-13 | 6.37E-11    |
| UTR3 | KRTAP4-12 | 17 | 39279735                            | 1 | cg10686758                                          | 0.445949885 | 0.330617539 | 0.281250095 | -0.16469979  | 1.68E-09 | 2.62E-08    |
| UTR3 | KRTAP5-10 | 11 | 71277473                            | 1 | cg12285580                                          | 0.736933565 | 0.6149521   | 0.570261923 | -0.166671642 | 5.79E-07 | 4.07E-06    |
| UTR3 | LAIR1     | 19 | 54866514                            | 1 | cg22545168                                          | 0.42214049  | 0.317314706 | 0.236689845 | -0.185450645 | 2.69E-12 | 2.46E-10    |
| UTR3 | LAMP3     | 3  | 182840603                           | 1 | cg04119852                                          | 0.37661814  | 0.279030739 | 0.213225627 | -0.163392513 | 2.16E-10 | 4.97E-09    |
| UTR3 | LASS3     | 15 | 100941674                           | 1 | cg27358936                                          | 0.647137555 | 0.489550944 | 0.428181414 | -0.218956141 | 1.34E-08 | 1.55E-07    |
| UTR3 | LASS4     | 19 | 8327065                             | 1 | cg02887374                                          | 0.818685195 | 0.709593661 | 0.588506577 | -0.230178618 | 1.68E-09 | 2.62E-08    |
| UTR3 | LAYN      | 11 | 111431381                           | 1 | cg03222632                                          | 0.65106607  | 0.547388567 | 0.441677491 | -0.209388579 | 1.38E-08 | 1.58E-07    |
| UTR3 | LCE1C     | 1  | 152777382                           | 1 | cg16011217                                          | 0.63745746  | 0.484337322 | 0.364683118 | -0.272774342 | 2.82E-13 | 5.74E-11    |
| UTR3 | LCE2A     | 1  | 152671707                           | 1 | cg16354520                                          | 0.54498256  | 0.379409567 | 0.252350123 | -0.292632437 | 2.88E-14 | 1.22E-11    |
| UTR3 | LCN10     | 9  | 139633680/139632<br>839             | 2 | cg10434996/cg13735<br>759                           | 0.67393744  | 0.549721972 | 0.399317668 | -0.274619772 | 1.39E-12 | 1.54E-10    |
| UTR3 | LDHA      | 11 | 18429080                            | 1 | cg17607330                                          | 0.576029415 | 0.501892622 | 0.423978745 | -0.15205067  | 4.74E-11 | 1.75E-09    |
| UTR3 | LELP1     | 1  | 153177577                           | 1 | cg18140889                                          | 0.373157445 | 0.269905067 | 0.2148949   | -0.158262545 | 5.93E-12 | 4.20E-10    |

|      |           |    |                                                 |   |                                                     |             |             |             |              |          |             |
|------|-----------|----|-------------------------------------------------|---|-----------------------------------------------------|-------------|-------------|-------------|--------------|----------|-------------|
| UTR3 | LGI3      | 8  | 22005501/2200560<br>2/22005545/220048<br>81     | 4 | cg07772400/cg17316<br>784/cg18440818/cg2<br>1609813 | 0.575764743 | 0.477986722 | 0.376635127 | -0.199129616 | 5.26E-10 | 9.86E-09    |
| UTR3 | LHX5      | 12 | 113900719/113900<br>751                         | 2 | cg00721315/cg11586<br>330                           | 0.33528102  | 0.364200703 | 0.51968583  | 0.18440481   | 4.16E-05 | 0.000178475 |
| UTR3 | LIFR      | 5  | 38479736                                        | 1 | cg04479876                                          | 0.527305235 | 0.408852022 | 0.330475505 | -0.19682973  | 1.36E-11 | 7.21E-10    |
| UTR3 | LILRB1    | 19 | 55148602                                        | 1 | cg08386867                                          | 0.86199604  | 0.773936728 | 0.631132927 | -0.230863113 | 4.30E-06 | 2.36E-05    |
| UTR3 | LIM2      | 19 | 51883242                                        | 1 | cg22222644                                          | 0.62113576  | 0.529555994 | 0.449817582 | -0.171318178 | 9.65E-08 | 8.42E-07    |
| UTR3 | LMO1      | 11 | 8245962                                         | 1 | cg21650086                                          | 0.53703783  | 0.440329533 | 0.356649732 | -0.180388098 | 1.56E-11 | 7.97E-10    |
| UTR3 | LMOD2     | 7  | 123304073                                       | 1 | cg25055892                                          | 0.613362185 | 0.545868833 | 0.404198091 | -0.209164094 | 2.50E-07 | 1.93E-06    |
| UTR3 | LOC150786 | 2  | 132119242                                       | 1 | cg16657479                                          | 0.60938099  | 0.577807828 | 0.453020636 | -0.156360354 | 3.95E-07 | 2.88E-06    |
| UTR3 | LOC643677 | 13 | 103381760                                       | 1 | cg09714424                                          | 0.78100912  | 0.702736772 | 0.545224695 | -0.235784425 | 8.73E-06 | 4.42E-05    |
| UTR3 | LPA       | 6  | 160952713                                       | 1 | cg10234069                                          | 0.49841431  | 0.404357139 | 0.329412682 | -0.169001628 | 3.58E-10 | 7.42E-09    |
| UTR3 | LPIN2     | 18 | 2917509                                         | 1 | cg20404260                                          | 0.461370655 | 0.377178289 | 0.296529491 | -0.164841164 | 1.24E-10 | 3.22E-09    |
| UTR3 | LRAT      | 4  | 155672265                                       | 1 | cg03473809                                          | 0.740864195 | 0.639801678 | 0.541596491 | -0.199267704 | 2.66E-06 | 1.55E-05    |
| UTR3 | LRRC29    | 16 | 67241345                                        | 1 | cg05708497                                          | 0.566115475 | 0.465077361 | 0.379649341 | -0.186466134 | 4.14E-14 | 1.46E-11    |
| UTR3 | LRRC33    | 3  | 196388687                                       | 1 | cg07364240                                          | 0.49921071  | 0.430527778 | 0.308356614 | -0.190854096 | 3.28E-10 | 6.86E-09    |
| UTR3 | LRRN2     | 1  | 204586547                                       | 1 | cg11820840                                          | 0.61777169  | 0.484634922 | 0.331329018 | -0.286442672 | 1.18E-11 | 6.50E-10    |
| UTR3 | LRTM2     | 12 | 1943889/1945300                                 | 2 | cg02505216/cg08982<br>864                           | 0.59561029  | 0.503415908 | 0.44432668  | -0.15128361  | 8.93E-09 | 1.08E-07    |
| UTR3 | LSAMP     | 3  | 115524190/115524<br>031                         | 2 | cg17080138/cg23075<br>139                           | 0.613490253 | 0.524736856 | 0.433114432 | -0.180375821 | 1.05E-07 | 9.09E-07    |
| UTR3 | LST1      | 6  | 31556482                                        | 1 | cg25664715                                          | 0.77500226  | 0.702124844 | 0.543219168 | -0.231783092 | 1.10E-07 | 9.41E-07    |
| UTR3 | LTB4R     | 14 | 24785933                                        | 1 | cg10065809                                          | 0.767093265 | 0.664340967 | 0.610628241 | -0.156465024 | 1.63E-06 | 9.97E-06    |
| UTR3 | LVRN      | 5  | 115363186                                       | 1 | cg20546296                                          | 0.54527649  | 0.419731511 | 0.299930923 | -0.245345567 | 9.41E-14 | 2.83E-11    |
| UTR3 | LYNX1     | 8  | 143856487/143856<br>122/143845999               | 3 | cg00801134/cg04350<br>571/cg16737416                | 0.694591328 | 0.621861394 | 0.537503721 | -0.157087607 | 5.22E-12 | 3.92E-10    |
| UTR3 | LYPD2     | 8  | 143831693                                       | 1 | cg05904795                                          | 0.74817241  | 0.695047106 | 0.586163268 | -0.162009142 | 2.95E-06 | 1.70E-05    |
| UTR3 | LYRM7     | 5  | 130540986                                       | 1 | cg13386215                                          | 0.637160565 | 0.5536973   | 0.429474041 | -0.207686524 | 7.11E-09 | 8.91E-08    |
| UTR3 | LZTS1     | 8  | 20106574/2010434<br>3                           | 2 | cg01815167/cg25306<br>432                           | 0.734748063 | 0.674227611 | 0.582203536 | -0.152544526 | 3.87E-07 | 2.83E-06    |
| UTR3 | MAP1D     | 2  | 172945274/172945<br>144/172945328/172<br>945383 | 4 | cg08402365/cg12608<br>433/cg14996143/cg2<br>4724664 | 0.497804547 | 0.594814398 | 0.716287405 | 0.218482858  | 3.96E-10 | 7.93E-09    |
| UTR3 | MAPK12    | 22 | 50691611                                        | 1 | cg26822572                                          | 0.628493555 | 0.520990167 | 0.45627885  | -0.172214705 | 3.21E-12 | 2.80E-10    |
| UTR3 | MAPK3     | 16 | 30126595                                        | 1 | cg05329317                                          | 0.46969132  | 0.386940122 | 0.315332677 | -0.154358643 | 4.79E-11 | 1.76E-09    |
| UTR3 | MASP1     | 3  | 186953108/186965<br>021/186937654               | 3 | cg01187883/cg04846<br>432/cg25818109                | 0.52071538  | 0.375958817 | 0.258824919 | -0.261890461 | 1.93E-13 | 4.80E-11    |
| UTR3 | MATK      | 19 | 3778090                                         | 1 | cg27083614                                          | 0.602399625 | 0.50942625  | 0.408988173 | -0.193411452 | 3.70E-12 | 3.09E-10    |

|      |        |    |                                |   |                                      |             |             |             |              |          |            |
|------|--------|----|--------------------------------|---|--------------------------------------|-------------|-------------|-------------|--------------|----------|------------|
| UTR3 | MEF2C  | 5  | 88017891                       | 1 | cg05654946                           | 0.828766405 | 0.708024689 | 0.678073877 | -0.150692528 | 9.06E-05 | 0.00035773 |
| UTR3 | MEIS3  | 19 | 47908061                       | 1 | cg15558904                           | 0.633779625 | 0.539107806 | 0.467652614 | -0.166127011 | 1.08E-05 | 5.34E-05   |
| UTR3 | MET    | 7  | 116438184                      | 1 | cg25557280                           | 0.54399849  | 0.432251344 | 0.316785177 | -0.227213313 | 7.35E-13 | 1.04E-10   |
| UTR3 | MFAP5  | 12 | 8799841                        | 1 | cg19543296                           | 0.88506451  | 0.718067278 | 0.608226045 | -0.276838465 | 3.66E-08 | 3.62E-07   |
| UTR3 | MFI2   | 3  | 196746085                      | 1 | cg01149239                           | 0.488799475 | 0.391729639 | 0.300261245 | -0.18853823  | 1.88E-10 | 4.50E-09   |
| UTR3 | MFSD6  | 2  | 191365138                      | 1 | cg13411286                           | 0.542286085 | 0.439693072 | 0.377160023 | -0.165126062 | 1.55E-05 | 7.38E-05   |
| UTR3 | MGAT5B | 17 | 74945219/7494497<br>0/74944924 | 3 | cg06127313/cg09150<br>928/cg22347696 | 0.662366517 | 0.530799541 | 0.432844685 | -0.229521832 | 2.90E-13 | 5.74E-11   |
| UTR3 | MIB2   | 1  | 1565931/1565856                | 2 | cg04882394/cg24368<br>383            | 0.258028163 | 0.376816479 | 0.490183548 | 0.232155386  | 2.03E-05 | 9.47E-05   |
| UTR3 | MKRN1  | 7  | 140153199/140156<br>225        | 2 | cg00123057/cg02976<br>323            | 0.422508305 | 0.318246756 | 0.257069768 | -0.165438537 | 7.19E-11 | 2.22E-09   |
| UTR3 | MMAB   | 12 | 109992779                      | 1 | cg16497413                           | 0.696704405 | 0.569127339 | 0.476494177 | -0.220210228 | 3.06E-14 | 1.22E-11   |
| UTR3 | MMP16  | 8  | 89053427                       | 1 | cg02526439                           | 0.60355949  | 0.436553261 | 0.351015227 | -0.252544263 | 8.12E-12 | 5.24E-10   |
| UTR3 | MMP8   | 11 | 102583226                      | 1 | cg08747557                           | 0.56603512  | 0.442314639 | 0.326475773 | -0.239559347 | 2.07E-07 | 1.64E-06   |
| UTR3 | MNX1   | 7  | 156797833/156797<br>988        | 2 | cg08309529/cg25090<br>972            | 0.569414385 | 0.675814633 | 0.750543568 | 0.181129183  | 1.01E-10 | 2.81E-09   |
| UTR3 | MPZL2  | 11 | 118124297/118125<br>492        | 2 | cg19259082/cg25249<br>241            | 0.651841265 | 0.532394122 | 0.445373523 | -0.206467742 | 2.01E-09 | 3.06E-08   |
| UTR3 | MRAP2  | 6  | 84799458/8480049<br>1          | 2 | cg02129814/cg11508<br>013            | 0.5156959   | 0.619757428 | 0.681245495 | 0.165549595  | 2.97E-08 | 3.05E-07   |
| UTR3 | MRAS   | 3  | 138121287                      | 1 | cg22907952                           | 0.631739155 | 0.513400206 | 0.386792786 | -0.244946369 | 4.58E-10 | 8.91E-09   |
| UTR3 | MRM1   | 17 | 34965294                       | 1 | cg06419964                           | 0.53498495  | 0.436132839 | 0.350797773 | -0.184187177 | 5.53E-06 | 2.94E-05   |
| UTR3 | MSC    | 8  | 72754469/7275427<br>2/72753888 | 3 | cg11382963/cg12809<br>365/cg24142603 | 0.461455853 | 0.532262231 | 0.665183986 | 0.203728133  | 2.75E-08 | 2.85E-07   |
| UTR3 | MSL1   | 17 | 38290796                       | 1 | cg06833098                           | 0.60631191  | 0.469128356 | 0.373427018 | -0.232884892 | 8.83E-11 | 2.52E-09   |
| UTR3 | MUC13  | 3  | 124625655                      | 1 | cg00446763                           | 0.34866579  | 0.250599922 | 0.195040055 | -0.153625735 | 2.88E-11 | 1.18E-09   |
| UTR3 | MUC15  | 11 | 26581996                       | 1 | cg22946774                           | 0.63064958  | 0.488837672 | 0.397135886 | -0.233513694 | 4.93E-07 | 3.53E-06   |
| UTR3 | MYBPC3 | 11 | 47353259                       | 1 | cg23614000                           | 0.46599205  | 0.383527061 | 0.298314068 | -0.167677982 | 2.64E-11 | 1.12E-09   |
| UTR3 | MYH13  | 17 | 10204251                       | 1 | cg26086902                           | 0.63082069  | 0.559814528 | 0.413222164 | -0.217598526 | 5.55E-07 | 3.91E-06   |
| UTR3 | MYH6   | 14 | 23851239                       | 1 | cg01593969                           | 0.493490985 | 0.402909956 | 0.330160368 | -0.163330617 | 2.29E-10 | 5.20E-09   |
| UTR3 | MYL1   | 2  | 211155085                      | 1 | cg17362927                           | 0.435472705 | 0.363302111 | 0.266745609 | -0.168727096 | 8.43E-10 | 1.46E-08   |
| UTR3 | MYL4   | 17 | 45301019                       | 1 | cg23956680                           | 0.50885743  | 0.429796411 | 0.355980077 | -0.152877353 | 8.19E-08 | 7.32E-07   |
| UTR3 | MYLK2  | 20 | 30421774                       | 1 | cg19609923                           | 0.537614895 | 0.447220422 | 0.368827009 | -0.168787886 | 1.39E-11 | 7.34E-10   |
| UTR3 | MYO18B | 22 | 26425557                       | 1 | cg09835278                           | 0.66473375  | 0.570003494 | 0.491124841 | -0.173608909 | 3.30E-07 | 2.46E-06   |
| UTR3 | MYO1H  | 12 | 109885015                      | 1 | cg24961970                           | 0.614580855 | 0.493862956 | 0.431715032 | -0.182865823 | 7.41E-06 | 3.82E-05   |
| UTR3 | MYO3A  | 10 | 26501031/2650106<br>5          | 2 | cg02232704/cg03876<br>032            | 0.54473274  | 0.648933586 | 0.74744327  | 0.20271053   | 3.10E-09 | 4.41E-08   |
| UTR3 | MYOC   | 1  | 171604882                      | 1 | cg06363798                           | 0.700266475 | 0.667095028 | 0.542422627 | -0.157843848 | 4.28E-06 | 2.35E-05   |

|      |         |    |                                                 |   |                                                                   |             |             |             |              |             |             |
|------|---------|----|-------------------------------------------------|---|-------------------------------------------------------------------|-------------|-------------|-------------|--------------|-------------|-------------|
| UTR3 | MYOCD   | 17 | 12661608/12669028                               | 2 | cg03891384/cg10974219                                             | 0.573616243 | 0.480293708 | 0.394314221 | -0.179302021 | 1.55E-07    | 1.27E-06    |
| UTR3 | MYOD1   | 11 | 17743080/17743282/17743610/17743667             | 4 | cg05694840/cg17862113/cg22344611/cg23897913                       | 0.388446704 | 0.450126965 | 0.570429447 | 0.181982743  | 1.23E-06    | 7.70E-06    |
| UTR3 | MYOM2   | 8  | 2092909/2093220/2093137                         | 3 | cg11955491/cg14696926/cg20149337                                  | 0.549047315 | 0.455994181 | 0.399022966 | -0.150024349 | 2.27E-10    | 5.19E-09    |
| UTR3 | NAT14   | 19 | 55998490/55998732/55998931                      | 3 | cg03645984/cg17379828/cg19820609                                  | 0.509887665 | 0.4367637   | 0.359526945 | -0.15036072  | 1.45E-09    | 2.30E-08    |
| UTR3 | NBEA    | 13 | 36246384                                        | 1 | cg10564626                                                        | 0.805383465 | 0.728326589 | 0.639357973 | -0.166025492 | 3.50E-05    | 0.000153238 |
| UTR3 | NBEAL2  | 3  | 47050950                                        | 1 | cg02534363                                                        | 0.636312055 | 0.744510589 | 0.811088686 | 0.174776631  | 4.95E-07    | 3.54E-06    |
| UTR3 | NCAM1   | 11 | 113135432/113147175                             | 2 | cg02323699/cg20857767                                             | 0.596555053 | 0.493600614 | 0.412931148 | -0.183623905 | 6.31E-12    | 4.38E-10    |
| UTR3 | NCKAP1L | 12 | 54936840                                        | 1 | cg26787915                                                        | 0.870193355 | 0.717033178 | 0.51087105  | -0.359322305 | 1.35E-08    | 1.56E-07    |
| UTR3 | NDNL2   | 15 | 29560915                                        | 1 | cg25937230                                                        | 0.52342311  | 0.596867411 | 0.696257459 | 0.172834349  | 5.70E-11    | 1.93E-09    |
| UTR3 | NDRG4   | 16 | 58545502/58545770                               | 2 | cg04194840/cg26514728                                             | 0.739003685 | 0.576222456 | 0.491452386 | -0.247551299 | 4.51E-08    | 4.35E-07    |
| UTR3 | NDUFC2  | 11 | 77780019                                        | 1 | cg07101980                                                        | 0.612419155 | 0.538828356 | 0.454918164 | -0.157500991 | 1.71E-10    | 4.16E-09    |
| UTR3 | NECAB2  | 16 | 84036179                                        | 1 | cg07939567                                                        | 0.650346875 | 0.527651583 | 0.416469259 | -0.233877616 | 6.05E-08    | 5.62E-07    |
| UTR3 | NEDD4L  | 18 | 56067462                                        | 1 | cg18687085                                                        | 0.387013135 | 0.284105344 | 0.219590327 | -0.167422808 | 1.35E-10    | 3.42E-09    |
| UTR3 | NEFM    | 8  | 24776195                                        | 1 | cg13387869                                                        | 0.753254105 | 0.691442006 | 0.594257755 | -0.15899635  | 0.000289895 | 0.001015777 |
| UTR3 | NETO1   | 18 | 70502513                                        | 1 | cg17327268                                                        | 0.732852515 | 0.653492567 | 0.571180855 | -0.16167166  | 0.000412012 | 0.001391138 |
| UTR3 | NEU4    | 2  | 242758725                                       | 1 | cg05195017                                                        | 0.44223969  | 0.2641673   | 0.193258385 | -0.248981305 | 3.70E-09    | 5.10E-08    |
| UTR3 | NEURL4  | 17 | 7219261/7219403/7219025/7218959/7219021/7219319 | 6 | cg12282267/cg12391328/cg13248200/cg15358396/cg16340178/cg26963545 | 0.645424193 | 0.543898394 | 0.488587789 | -0.156836404 | 1.34E-09    | 2.16E-08    |
| UTR3 | NEUROD4 | 12 | 55423208                                        | 1 | cg20207414                                                        | 0.65093147  | 0.531818239 | 0.394863114 | -0.256068356 | 6.30E-12    | 4.38E-10    |
| UTR3 | NHP2L1  | 22 | 42070666                                        | 1 | cg08303253                                                        | 0.617097185 | 0.546627661 | 0.465557418 | -0.151539767 | 7.66E-10    | 1.34E-08    |
| UTR3 | NID1    | 1  | 236140577                                       | 1 | cg07549090                                                        | 0.901418005 | 0.816503083 | 0.740975345 | -0.16044266  | 2.91E-07    | 2.20E-06    |
| UTR3 | NINL    | 20 | 25433878                                        | 1 | cg06913219                                                        | 0.53436316  | 0.457514033 | 0.349839682 | -0.184523478 | 5.35E-11    | 1.88E-09    |
| UTR3 | NIPA2   | 15 | 23005487                                        | 1 | cg17122577                                                        | 0.689716695 | 0.639749083 | 0.537368495 | -0.1523482   | 1.51E-08    | 1.69E-07    |
| UTR3 | NKX2-1  | 14 | 36986363/36985711/36985905                      | 3 | cg07345734/cg12103037/cg13980454                                  | 0.400352755 | 0.497149002 | 0.626119574 | 0.225766819  | 1.66E-06    | 1.01E-05    |
| UTR3 | NKX2-2  | 20 | 21492558/21491781                               | 2 | cg03133868/cg18464649                                             | 0.549591918 | 0.627321031 | 0.736630991 | 0.187039073  | 4.38E-08    | 4.24E-07    |
| UTR3 | NKX2-4  | 20 | 21376484/21376337                               | 2 | cg07247419/cg13880779                                             | 0.22287616  | 0.28210296  | 0.433882499 | 0.211006339  | 6.95E-05    | 0.000281579 |

|      |        |    |                                                 |   |                                                     |             |             |             |              |             |             |
|------|--------|----|-------------------------------------------------|---|-----------------------------------------------------|-------------|-------------|-------------|--------------|-------------|-------------|
| UTR3 | NKX2-5 | 5  | 172659512/172659<br>241/172659730/172<br>660080 | 4 | cg03219908/cg07798<br>980/cg19923650/cg2<br>5916711 | 0.349399772 | 0.389401576 | 0.501256997 | 0.151857225  | 0.000172277 | 0.000633668 |
| UTR3 | NKX2-8 | 14 | 37049893/3704956<br>5/37049299                  | 3 | cg18396984/cg23676<br>577/cg23705938                | 0.365940128 | 0.4481516   | 0.543273797 | 0.177333669  | 2.73E-07    | 2.09E-06    |
| UTR3 | NKX6-2 | 10 | 134598352                                       | 1 | cg11174855                                          | 0.57658977  | 0.650269983 | 0.743038327 | 0.166448557  | 3.05E-08    | 3.11E-07    |
| UTR3 | NLRP14 | 11 | 7092719                                         | 1 | cg07103673                                          | 0.606905665 | 0.396998006 | 0.296656455 | -0.31024921  | 1.28E-12    | 1.47E-10    |
| UTR3 | NLRP2  | 19 | 55512301                                        | 1 | cg26489750                                          | 0.71910822  | 0.63593745  | 0.546334686 | -0.172773534 | 1.07E-05    | 5.27E-05    |
| UTR3 | NLRP4  | 19 | 56393163                                        | 1 | cg18740359                                          | 0.632099595 | 0.509583089 | 0.4214362   | -0.210663395 | 2.33E-10    | 5.25E-09    |
| UTR3 | NLRP9  | 19 | 56220025                                        | 1 | cg27637326                                          | 0.70927275  | 0.586231    | 0.504763755 | -0.204508995 | 2.29E-07    | 1.79E-06    |
| UTR3 | NMUR2  | 5  | 151771606                                       | 1 | cg07429087                                          | 0.503317865 | 0.430939256 | 0.345237274 | -0.158080591 | 0.00014169  | 0.000530463 |
| UTR3 | NNAT   | 20 | 36151184/3615168<br>3/36151338                  | 3 | cg06198069/cg13668<br>823/cg22582721                | 0.82321326  | 0.708262914 | 0.5991139   | -0.22409936  | 6.03E-10    | 1.11E-08    |
| UTR3 | NOB1   | 16 | 69776039/6977610<br>0                           | 2 | cg05006942/cg16378<br>003                           | 0.606749335 | 0.5201219   | 0.448899973 | -0.157849362 | 3.24E-10    | 6.79E-09    |
| UTR3 | NOTCH3 | 19 | 15271010                                        | 1 | cg18875435                                          | 0.60321667  | 0.473108178 | 0.385741727 | -0.217474943 | 7.22E-09    | 9.01E-08    |
| UTR3 | NOVA1  | 14 | 26916082                                        | 1 | cg19534149                                          | 0.763085575 | 0.691129233 | 0.599598582 | -0.163486993 | 9.59E-06    | 4.80E-05    |
| UTR3 | NPM1   | 5  | 170833685                                       | 1 | cg13701509                                          | 0.587882345 | 0.480606983 | 0.400088368 | -0.187793977 | 5.14E-10    | 9.66E-09    |
| UTR3 | NPPB   | 1  | 11917550                                        | 1 | cg07585427                                          | 0.3497406   | 0.246548289 | 0.196773175 | -0.152967425 | 2.56E-10    | 5.64E-09    |
| UTR3 | NPR3   | 5  | 32786671                                        | 1 | cg25996586                                          | 0.608480995 | 0.487308006 | 0.314877286 | -0.293603709 | 1.28E-09    | 2.08E-08    |
| UTR3 | NPS    | 10 | 129350922                                       | 1 | cg19321696                                          | 0.57320293  | 0.429348739 | 0.273219223 | -0.299983707 | 3.72E-16    | 1.90E-12    |
| UTR3 | NPY    | 7  | 24331369                                        | 1 | cg11892240                                          | 0.6573079   | 0.535913494 | 0.401827741 | -0.255480159 | 6.61E-09    | 8.40E-08    |
| UTR3 | NR5A1  | 9  | 127244764                                       | 1 | cg13476313                                          | 0.442325205 | 0.337871522 | 0.292016977 | -0.150308228 | 7.19E-07    | 4.82E-06    |
| UTR3 | NT5C   | 17 | 73126499                                        | 1 | cg11409350                                          | 0.70601368  | 0.589535583 | 0.501447109 | -0.204566571 | 2.54E-09    | 3.71E-08    |
| UTR3 | NTNG1  | 1  | 108023482                                       | 1 | cg26015416                                          | 0.41246796  | 0.535561772 | 0.598977932 | 0.186509972  | 2.97E-05    | 0.000132259 |
| UTR3 | NUP153 | 6  | 17615976                                        | 1 | cg20062978                                          | 0.864297075 | 0.739027794 | 0.623285886 | -0.241011189 | 1.42E-08    | 1.62E-07    |
| UTR3 | NUP43  | 6  | 150045504                                       | 1 | cg00424166                                          | 0.76030968  | 0.601710944 | 0.534083577 | -0.226226103 | 1.55E-08    | 1.74E-07    |
| UTR3 | NXPH1  | 7  | 8791686                                         | 1 | cg21001050                                          | 0.685860495 | 0.569091922 | 0.422650391 | -0.263210104 | 1.55E-09    | 2.44E-08    |
| UTR3 | NXPH3  | 17 | 47656736/4766113<br>6                           | 2 | cg15797422/cg20925<br>233                           | 0.572202223 | 0.485269781 | 0.40845543  | -0.163746793 | 1.05E-11    | 5.93E-10    |
| UTR3 | OBP2B  | 9  | 136081048                                       | 1 | cg14372265                                          | 0.7211495   | 0.629608339 | 0.5188209   | -0.2023286   | 1.41E-08    | 1.61E-07    |
| UTR3 | OCA2   | 15 | 28000367                                        | 1 | cg26388707                                          | 0.654425955 | 0.512326694 | 0.419094805 | -0.23533115  | 8.27E-09    | 1.01E-07    |
| UTR3 | ODAM   | 4  | 71069600                                        | 1 | cg19903738                                          | 0.462427625 | 0.386892889 | 0.291205091 | -0.171222534 | 6.86E-11    | 2.16E-09    |
| UTR3 | ODF3   | 11 | 200083                                          | 1 | cg25718632                                          | 0.842562685 | 0.740593006 | 0.674275168 | -0.168287517 | 4.07E-08    | 3.98E-07    |
| UTR3 | ODF4   | 17 | 8249349                                         | 1 | cg09820557                                          | 0.78970371  | 0.703308028 | 0.5911714   | -0.19853231  | 2.36E-06    | 1.39E-05    |
| UTR3 | ODZ2   | 5  | 167690914                                       | 1 | cg18013921                                          | 0.56186244  | 0.472463728 | 0.331416923 | -0.230445517 | 3.55E-09    | 4.93E-08    |



|      |         |    |                                                             |   |                                                                |             |             |             |              |             |             |
|------|---------|----|-------------------------------------------------------------|---|----------------------------------------------------------------|-------------|-------------|-------------|--------------|-------------|-------------|
| UTR3 | OLIG3   | 6  | 137814078/137813<br>878/137814356/137 5<br>813584/137813648 |   | cg03602029/cg04508<br>701/cg10071643/cg1<br>3560452/cg15980797 | 0.327801704 | 0.382949581 | 0.491321403 | 0.163519698  | 3.92E-05    | 0.000169378 |
| UTR3 | OPA3    | 19 | 46052863/4605672 3<br>3/46031516                            |   | cg02288770/cg18489<br>009/cg22706147                           | 0.554000105 | 0.439895244 | 0.344507345 | -0.20949276  | 8.48E-11    | 2.47E-09    |
| UTR3 | OPRL1   | 20 | 62730763                                                    | 1 | cg15824741                                                     | 0.692466295 | 0.574920233 | 0.449933345 | -0.24253295  | 1.64E-10    | 4.02E-09    |
| UTR3 | OR56A1  | 11 | 6047917                                                     | 1 | cg12415917                                                     | 0.654851195 | 0.520480289 | 0.384424768 | -0.270426427 | 2.62E-11    | 1.12E-09    |
| UTR3 | OR7D2   | 19 | 9299162                                                     | 1 | cg04521512                                                     | 0.765251955 | 0.637935622 | 0.57060125  | -0.194650705 | 3.46E-07    | 2.55E-06    |
| UTR3 | OSBPL6  | 2  | 179260782                                                   | 1 | cg21182526                                                     | 0.747212875 | 0.665576506 | 0.515118623 | -0.232094252 | 2.03E-06    | 1.22E-05    |
| UTR3 | OTUD7A  | 15 | 31775406                                                    | 1 | cg01763090                                                     | 0.269188475 | 0.324889211 | 0.454107795 | 0.18491932   | 4.19E-06    | 2.30E-05    |
| UTR3 | OTX1    | 2  | 63283806/6328393<br>9/63284132/632839 5<br>67/63284066      |   | cg03299042/cg07938<br>743/cg10122865/cg2<br>1472506/cg23229261 | 0.191192393 | 0.19920873  | 0.347481962 | 0.15628957   | 0.005596475 | 0.01397339  |
| UTR3 | P2RX5   | 17 | 3576856/3593588/3 3<br>576600                               |   | cg04221683/cg10373<br>741/cg15763823                           | 0.641832925 | 0.527703169 | 0.452319212 | -0.189513713 | 8.13E-11    | 2.42E-09    |
| UTR3 | P2RX6   | 22 | 21381565                                                    | 1 | cg25418528                                                     | 0.67351304  | 0.598043928 | 0.511755986 | -0.161757054 | 2.98E-08    | 3.05E-07    |
| UTR3 | P2RY1   | 3  | 152555206                                                   | 1 | cg06809364                                                     | 0.56570539  | 0.432520194 | 0.384786859 | -0.180918531 | 8.95E-10    | 1.53E-08    |
| UTR3 | PABPC4L | 4  | 135121050                                                   | 1 | cg15867829                                                     | 0.66543919  | 0.512347756 | 0.362865264 | -0.302573926 | 5.79E-12    | 4.19E-10    |
| UTR3 | PAEP    | 9  | 138458521                                                   | 1 | cg14532484                                                     | 0.59506906  | 0.519429894 | 0.435230982 | -0.159838078 | 8.05E-07    | 5.33E-06    |
| UTR3 | PANX3   | 11 | 124490178                                                   | 1 | cg10118227                                                     | 0.796440585 | 0.600716367 | 0.471743309 | -0.324697276 | 2.98E-13    | 5.74E-11    |
| UTR3 | PATL2   | 15 | 44958131                                                    | 1 | cg24799947                                                     | 0.703710905 | 0.607091956 | 0.453196259 | -0.250514646 | 1.12E-09    | 1.86E-08    |
| UTR3 | PAX8    | 2  | 113975820/113976 2<br>143                                   |   | cg09234973/cg25758<br>828                                      | 0.597235155 | 0.465870833 | 0.359228177 | -0.238006978 | 1.01E-11    | 5.82E-10    |
| UTR3 | PBRM1   | 3  | 52580707                                                    | 1 | cg05923681                                                     | 0.608143815 | 0.484950683 | 0.41407915  | -0.194064665 | 1.05E-07    | 9.09E-07    |
| UTR3 | PCDH10  | 4  | 134074369                                                   | 1 | cg23713176                                                     | 0.27967513  | 0.377428472 | 0.523473918 | 0.243798788  | 9.08E-06    | 4.57E-05    |
| UTR3 | PCDH12  | 5  | 141324726                                                   | 1 | cg26837730                                                     | 0.628185675 | 0.490360344 | 0.429882545 | -0.19830313  | 1.19E-16    | 1.21E-12    |
| UTR3 | PCDH9   | 13 | 66878738                                                    | 1 | cg15067350                                                     | 0.79748509  | 0.704192917 | 0.620273123 | -0.177211967 | 9.17E-08    | 8.07E-07    |
| UTR3 | PCDHA1  | 5  | 140389945                                                   | 1 | cg25487047                                                     | 0.494478275 | 0.411816828 | 0.316270364 | -0.178207911 | 3.06E-06    | 1.74E-05    |
| UTR3 | PCDHA10 | 5  | 140389945                                                   | 1 | cg25487047                                                     | 0.494478275 | 0.411816828 | 0.316270364 | -0.178207911 | 3.06E-06    | 1.74E-05    |
| UTR3 | PCDHA11 | 5  | 140389945                                                   | 1 | cg25487047                                                     | 0.494478275 | 0.411816828 | 0.316270364 | -0.178207911 | 3.06E-06    | 1.74E-05    |
| UTR3 | PCDHA12 | 5  | 140389945                                                   | 1 | cg25487047                                                     | 0.494478275 | 0.411816828 | 0.316270364 | -0.178207911 | 3.06E-06    | 1.74E-05    |
| UTR3 | PCDHA13 | 5  | 140389945                                                   | 1 | cg25487047                                                     | 0.494478275 | 0.411816828 | 0.316270364 | -0.178207911 | 3.06E-06    | 1.74E-05    |
| UTR3 | PCDHA3  | 5  | 140389945                                                   | 1 | cg25487047                                                     | 0.494478275 | 0.411816828 | 0.316270364 | -0.178207911 | 3.06E-06    | 1.74E-05    |
| UTR3 | PCDHA4  | 5  | 140389945                                                   | 1 | cg25487047                                                     | 0.494478275 | 0.411816828 | 0.316270364 | -0.178207911 | 3.06E-06    | 1.74E-05    |
| UTR3 | PCDHA5  | 5  | 140389945                                                   | 1 | cg25487047                                                     | 0.494478275 | 0.411816828 | 0.316270364 | -0.178207911 | 3.06E-06    | 1.74E-05    |

|      |          |   |                               |   |                                  |             |             |             |              |          |          |
|------|----------|---|-------------------------------|---|----------------------------------|-------------|-------------|-------------|--------------|----------|----------|
| UTR3 | PCDHA6   | 5 | 140389945                     | 1 | cg25487047                       | 0.494478275 | 0.411816828 | 0.316270364 | -0.178207911 | 3.06E-06 | 1.74E-05 |
| UTR3 | PCDHA7   | 5 | 140389945                     | 1 | cg25487047                       | 0.494478275 | 0.411816828 | 0.316270364 | -0.178207911 | 3.06E-06 | 1.74E-05 |
| UTR3 | PCDHA8   | 5 | 140389945                     | 1 | cg25487047                       | 0.494478275 | 0.411816828 | 0.316270364 | -0.178207911 | 3.06E-06 | 1.74E-05 |
| UTR3 | PCDHA9   | 5 | 140389945                     | 1 | cg25487047                       | 0.494478275 | 0.411816828 | 0.316270364 | -0.178207911 | 3.06E-06 | 1.74E-05 |
| UTR3 | PCDHAC2  | 5 | 140389945                     | 1 | cg25487047                       | 0.494478275 | 0.411816828 | 0.316270364 | -0.178207911 | 3.06E-06 | 1.74E-05 |
| UTR3 | PCDHGA1  | 5 | 140892370/140891767/140892308 | 3 | cg00104845/cg00283283/cg05494467 | 0.409542857 | 0.466664586 | 0.566230655 | 0.156687798  | 6.23E-07 | 4.25E-06 |
| UTR3 | PCDHGA10 | 5 | 140892370/140891767/140892308 | 3 | cg00104845/cg00283283/cg05494467 | 0.409542857 | 0.466664586 | 0.566230655 | 0.156687798  | 6.23E-07 | 4.25E-06 |
| UTR3 | PCDHGA11 | 5 | 140892370/140891767/140892308 | 3 | cg00104845/cg00283283/cg05494467 | 0.409542857 | 0.466664586 | 0.566230655 | 0.156687798  | 6.23E-07 | 4.25E-06 |
| UTR3 | PCDHGA12 | 5 | 140892370/140891767/140892308 | 3 | cg00104845/cg00283283/cg05494467 | 0.409542857 | 0.466664586 | 0.566230655 | 0.156687798  | 6.23E-07 | 4.25E-06 |
| UTR3 | PCDHGA2  | 5 | 140892370/140891767/140892308 | 3 | cg00104845/cg00283283/cg05494467 | 0.409542857 | 0.466664586 | 0.566230655 | 0.156687798  | 6.23E-07 | 4.25E-06 |
| UTR3 | PCDHGA3  | 5 | 140892370/140891767/140892308 | 3 | cg00104845/cg00283283/cg05494467 | 0.409542857 | 0.466664586 | 0.566230655 | 0.156687798  | 6.23E-07 | 4.25E-06 |
| UTR3 | PCDHGA4  | 5 | 140892370/140891767/140892308 | 3 | cg00104845/cg00283283/cg05494467 | 0.409542857 | 0.466664586 | 0.566230655 | 0.156687798  | 6.23E-07 | 4.25E-06 |
| UTR3 | PCDHGA5  | 5 | 140892370/140891767/140892308 | 3 | cg00104845/cg00283283/cg05494467 | 0.409542857 | 0.466664586 | 0.566230655 | 0.156687798  | 6.23E-07 | 4.25E-06 |
| UTR3 | PCDHGA6  | 5 | 140892370/140891767/140892308 | 3 | cg00104845/cg00283283/cg05494467 | 0.409542857 | 0.466664586 | 0.566230655 | 0.156687798  | 6.23E-07 | 4.25E-06 |
| UTR3 | PCDHGA7  | 5 | 140892370/140891767/140892308 | 3 | cg00104845/cg00283283/cg05494467 | 0.409542857 | 0.466664586 | 0.566230655 | 0.156687798  | 6.23E-07 | 4.25E-06 |
| UTR3 | PCDHGA8  | 5 | 140892370/140891767/140892308 | 3 | cg00104845/cg00283283/cg05494467 | 0.409542857 | 0.466664586 | 0.566230655 | 0.156687798  | 6.23E-07 | 4.25E-06 |
| UTR3 | PCDHGA9  | 5 | 140892370/140891767/140892308 | 3 | cg00104845/cg00283283/cg05494467 | 0.409542857 | 0.466664586 | 0.566230655 | 0.156687798  | 6.23E-07 | 4.25E-06 |
| UTR3 | PCDHGB1  | 5 | 140892370/140891767/140892308 | 3 | cg00104845/cg00283283/cg05494467 | 0.409542857 | 0.466664586 | 0.566230655 | 0.156687798  | 6.23E-07 | 4.25E-06 |
| UTR3 | PCDHGB2  | 5 | 140892370/140891767/140892308 | 3 | cg00104845/cg00283283/cg05494467 | 0.409542857 | 0.466664586 | 0.566230655 | 0.156687798  | 6.23E-07 | 4.25E-06 |
| UTR3 | PCDHGB3  | 5 | 140892370/140891767/140892308 | 3 | cg00104845/cg00283283/cg05494467 | 0.409542857 | 0.466664586 | 0.566230655 | 0.156687798  | 6.23E-07 | 4.25E-06 |

|      |         |    |                                                                       |   |                                                                              |             |             |             |              |             |             |
|------|---------|----|-----------------------------------------------------------------------|---|------------------------------------------------------------------------------|-------------|-------------|-------------|--------------|-------------|-------------|
| UTR3 | PCDHGB4 | 5  | 140892370/140891767/140892308                                         | 3 | cg00104845/cg00283283/cg05494467                                             | 0.409542857 | 0.466664586 | 0.566230655 | 0.156687798  | 6.23E-07    | 4.25E-06    |
| UTR3 | PCDHGB5 | 5  | 140892370/140891767/140892308                                         | 3 | cg00104845/cg00283283/cg05494467                                             | 0.409542857 | 0.466664586 | 0.566230655 | 0.156687798  | 6.23E-07    | 4.25E-06    |
| UTR3 | PCDHGB6 | 5  | 140892370/140891767/140892308                                         | 3 | cg00104845/cg00283283/cg05494467                                             | 0.409542857 | 0.466664586 | 0.566230655 | 0.156687798  | 6.23E-07    | 4.25E-06    |
| UTR3 | PCDHGB7 | 5  | 140892370/140891767/140892308                                         | 3 | cg00104845/cg00283283/cg05494467                                             | 0.409542857 | 0.466664586 | 0.566230655 | 0.156687798  | 6.23E-07    | 4.25E-06    |
| UTR3 | PCDHGC3 | 5  | 140892370/140891767/140892308                                         | 3 | cg00104845/cg00283283/cg05494467                                             | 0.409542857 | 0.466664586 | 0.566230655 | 0.156687798  | 6.23E-07    | 4.25E-06    |
| UTR3 | PCDHGC4 | 5  | 140892370/140891767/140892308                                         | 3 | cg00104845/cg00283283/cg05494467                                             | 0.409542857 | 0.466664586 | 0.566230655 | 0.156687798  | 6.23E-07    | 4.25E-06    |
| UTR3 | PCDHGC5 | 5  | 140892370/140891767/140892308                                         | 3 | cg00104845/cg00283283/cg05494467                                             | 0.409542857 | 0.466664586 | 0.566230655 | 0.156687798  | 6.23E-07    | 4.25E-06    |
| UTR3 | PDE1B   | 12 | 54972872                                                              | 1 | cg15937109                                                                   | 0.651512635 | 0.598687561 | 0.475665073 | -0.175847562 | 2.06E-06    | 1.23E-05    |
| UTR3 | PDE2A   | 11 | 72288270                                                              | 1 | cg24987622                                                                   | 0.464078155 | 0.359016933 | 0.272701995 | -0.19137616  | 5.63E-12    | 4.11E-10    |
| UTR3 | PDGFC   | 4  | 157682848                                                             | 1 | cg15957807                                                                   | 0.72117245  | 0.583535839 | 0.400430395 | -0.320742055 | 1.66E-10    | 4.04E-09    |
| UTR3 | PDX1    | 13 | 28499045/28498878/28498956                                            | 3 | cg00184376/cg15961466/cg26299169                                             | 0.32888554  | 0.421182144 | 0.664261111 | 0.335375571  | 2.65E-09    | 3.85E-08    |
| UTR3 | PEA15   | 1  | 160184732                                                             | 1 | cg25312122                                                                   | 0.548236545 | 0.4424557   | 0.346786545 | -0.20145     | 6.15E-11    | 2.01E-09    |
| UTR3 | PGAP3   | 17 | 37827454/37828296                                                     | 2 | cg05869169/cg19758448                                                        | 0.468601195 | 0.345282383 | 0.279021277 | -0.189579918 | 1.89E-10    | 4.53E-09    |
| UTR3 | PGK2    | 6  | 49753577                                                              | 1 | cg02482438                                                                   | 0.543149635 | 0.39180955  | 0.281179145 | -0.26197049  | 4.92E-13    | 7.73E-11    |
| UTR3 | PHLDA3  | 1  | 201437101/201437298/201435275                                         | 3 | cg04055835/cg08639762/cg26120226                                             | 0.62117279  | 0.591942722 | 0.438409741 | -0.182763049 | 9.20E-09    | 1.11E-07    |
| UTR3 | PHOX2B  | 4  | 41746614/41747568/41746697/41747092/41746947                          | 5 | cg01470356/cg08062484/cg13123927/cg20438306/cg24693341                       | 0.402785513 | 0.466400484 | 0.572572745 | 0.169787232  | 9.88E-09    | 1.18E-07    |
| UTR3 | PHYHIPL | 10 | 61007196                                                              | 1 | cg07625992                                                                   | 0.770272225 | 0.789121933 | 0.617386782 | -0.152885443 | 0.001374368 | 0.004082704 |
| UTR3 | PICALM  | 11 | 85668951                                                              | 1 | cg24200175                                                                   | 0.56308173  | 0.451235422 | 0.368202236 | -0.194879494 | 2.28E-10    | 5.19E-09    |
| UTR3 | PIK3CG  | 7  | 106545895                                                             | 1 | cg24232378                                                                   | 0.75614835  | 0.641287256 | 0.486666368 | -0.269481982 | 1.14E-06    | 7.22E-06    |
| UTR3 | PIK3R5  | 17 | 8783908                                                               | 1 | cg04907571                                                                   | 0.649269875 | 0.523826706 | 0.40164175  | -0.247628125 | 3.17E-13    | 5.79E-11    |
| UTR3 | PITX1   | 5  | 134364387/134363562/134363877/134363973/134363637/134363823/134363516 | 7 | cg00396667/cg02037307/cg04223420/cg07274716/cg08206318/cg22827250/cg26509691 | 0.441969368 | 0.559504247 | 0.696047968 | 0.2540786    | 2.70E-12    | 2.46E-10    |

|      |          |    |                                                                   |   |                                                                               |             |             |             |              |             |             |
|------|----------|----|-------------------------------------------------------------------|---|-------------------------------------------------------------------------------|-------------|-------------|-------------|--------------|-------------|-------------|
| UTR3 | PKD2L1   | 10 | 102048137                                                         | 1 | cg25155149                                                                    | 0.68594925  | 0.588848139 | 0.471665482 | -0.214283768 | 2.19E-07    | 1.72E-06    |
| UTR3 | PKHD1    | 6  | 51481908                                                          | 1 | cg01776172                                                                    | 0.54562239  | 0.440443122 | 0.284132482 | -0.261489908 | 1.38E-11    | 7.27E-10    |
| UTR3 | PLA2G10  | 16 | 14766421                                                          | 1 | cg27058221                                                                    | 0.435201765 | 0.332823744 | 0.248110259 | -0.187091506 | 3.83E-10    | 7.84E-09    |
| UTR3 | PLA2G4C  | 19 | 48551504                                                          | 1 | cg12986110                                                                    | 0.585142475 | 0.494844211 | 0.340336014 | -0.244806461 | 5.10E-09    | 6.71E-08    |
| UTR3 | PLA2G6   | 22 | 38507857/3850813<br>2                                             | 2 | cg15944459/cg21007<br>971                                                     | 0.577785435 | 0.4830396   | 0.399261364 | -0.178524071 | 1.52E-11    | 7.90E-10    |
| UTR3 | PLAGL1   | 6  | 144262297/144262<br>258                                           | 2 | cg01659632/cg13607<br>311                                                     | 0.758548888 | 0.658284081 | 0.568083425 | -0.190465463 | 1.30E-08    | 1.51E-07    |
| UTR3 | PLCL1    | 2  | 199013270                                                         | 1 | cg09349723                                                                    | 0.66798426  | 0.4970543   | 0.349158882 | -0.318825378 | 7.68E-12    | 5.03E-10    |
| UTR3 | PLEKHA4  | 19 | 49340489/4934057<br>4/49340765/493405<br>93                       | 4 | cg04777726/cg16594<br>139/cg19024700/cg2<br>6267310                           | 0.376007511 | 0.484255928 | 0.568531901 | 0.19252439   | 1.14E-06    | 7.22E-06    |
| UTR3 | PLG      | 6  | 161174486                                                         | 1 | cg16140548                                                                    | 0.621746305 | 0.578185828 | 0.440008064 | -0.181738241 | 8.52E-06    | 4.33E-05    |
| UTR3 | PLIN5    | 19 | 4523345                                                           | 1 | cg02392228                                                                    | 0.365934375 | 0.291733839 | 0.215653977 | -0.150280398 | 5.01E-10    | 9.48E-09    |
| UTR3 | PLN      | 6  | 118881378                                                         | 1 | cg05270007                                                                    | 0.77820197  | 0.654715783 | 0.61692585  | -0.16127612  | 8.70E-10    | 1.50E-08    |
| UTR3 | PNLIPRP1 | 10 | 118368634                                                         | 1 | cg08580014                                                                    | 0.509272975 | 0.425569067 | 0.349114059 | -0.160158916 | 3.68E-08    | 3.64E-07    |
| UTR3 | PNMAL1   | 19 | 46971373/4696991<br>9                                             | 2 | cg11808658/cg25734<br>089                                                     | 0.634225603 | 0.550149044 | 0.467346595 | -0.166879007 | 2.68E-10    | 5.85E-09    |
| UTR3 | PNPLA2   | 11 | 824970                                                            | 1 | cg27238887                                                                    | 0.63647616  | 0.543338828 | 0.474115291 | -0.162360869 | 4.40E-10    | 8.63E-09    |
| UTR3 | PNPLA5   | 22 | 44276013                                                          | 1 | cg09142166                                                                    | 0.586836275 | 0.446737322 | 0.343632986 | -0.243203289 | 6.56E-10    | 1.19E-08    |
| UTR3 | POLR1B   | 2  | 113333716                                                         | 1 | cg02614999                                                                    | 0.60449706  | 0.453095972 | 0.372716527 | -0.231780533 | 1.30E-11    | 6.97E-10    |
| UTR3 | POMC     | 2  | 25383940/2538385<br>1                                             | 2 | cg10045137/cg23809<br>645                                                     | 0.695748515 | 0.623282033 | 0.538582745 | -0.15716577  | 2.64E-08    | 2.75E-07    |
| UTR3 | POMGNT1  | 1  | 46654770                                                          | 1 | cg04089800                                                                    | 0.57835433  | 0.467037922 | 0.372877323 | -0.205477007 | 2.13E-10    | 4.92E-09    |
| UTR3 | POU3F1   | 1  | 38509934/3851093<br>3/38510074/385105<br>22/38510383/38510<br>182 | 6 | cg05785481/cg08599<br>259/cg13149116/cg2<br>2821908/cg25488697<br>/cg25609528 | 0.200020794 | 0.318494176 | 0.469416162 | 0.269395368  | 1.19E-09    | 1.96E-08    |
| UTR3 | POU4F2   | 4  | 147562073                                                         | 1 | cg21200539                                                                    | 0.37320488  | 0.541917483 | 0.697049414 | 0.323844534  | 7.77E-11    | 2.34E-09    |
| UTR3 | PPEF2    | 4  | 76781503                                                          | 1 | cg12289476                                                                    | 0.59898212  | 0.528208294 | 0.446943636 | -0.152038484 | 5.99E-08    | 5.58E-07    |
| UTR3 | PPFIA4   | 1  | 203046885/203047<br>830                                           | 2 | cg15493970/cg22126<br>171                                                     | 0.589916293 | 0.485700164 | 0.3596239   | -0.230292393 | 1.35E-10    | 3.42E-09    |
| UTR3 | PPP1R14A | 19 | 38741928                                                          | 1 | cg11854183                                                                    | 0.494427475 | 0.420065828 | 0.343928073 | -0.150499402 | 1.03E-08    | 1.24E-07    |
| UTR3 | PPP1R3A  | 7  | 113517552                                                         | 1 | cg17844121                                                                    | 0.81121758  | 0.759289222 | 0.646646318 | -0.164571262 | 0.000190472 | 0.000693596 |
| UTR3 | PRAMEF4  | 1  | 12939180                                                          | 1 | cg22596861                                                                    | 0.64920295  | 0.580771983 | 0.473105245 | -0.176097705 | 2.78E-09    | 4.00E-08    |
| UTR3 | PRDM14   | 8  | 70964123                                                          | 1 | cg14642381                                                                    | 0.4759041   | 0.3550472   | 0.272281173 | -0.203622927 | 7.95E-13    | 1.10E-10    |

|      |        |    |                                                                                                                                                 |    |                                                                                                                                                                                                          |             |             |             |              |          |          |
|------|--------|----|-------------------------------------------------------------------------------------------------------------------------------------------------|----|----------------------------------------------------------------------------------------------------------------------------------------------------------------------------------------------------------|-------------|-------------|-------------|--------------|----------|----------|
| UTR3 | PRDM16 | 1  | 3352986/3352435/3<br>351615/3352830/33<br>54412/3350440/335<br>1504/3352257/3351<br>390/3352884/33544<br>67/3354433/335055<br>8/3351106/3352544 | 15 | cg00063748/cg01062<br>116/cg01773689/cg0<br>2333588/cg02587392<br>/cg04285727/cg0631<br>3241/cg08865559/cg<br>09867208/cg1184874<br>8/cg12694058/cg134<br>79148/cg13692649/c<br>g22608265/cg230220<br>57 | 0.799503338 | 0.722370423 | 0.642214878 | -0.15728846  | 7.69E-11 | 2.33E-09 |
| UTR3 | PRDM6  | 5  | 122523277                                                                                                                                       | 1  | cg01546873                                                                                                                                                                                               | 0.70618941  | 0.616933733 | 0.551063273 | -0.155126137 | 1.02E-05 | 5.08E-05 |
| UTR3 | PRDM7  | 16 | 90124400                                                                                                                                        | 1  | cg00974523                                                                                                                                                                                               | 0.520645375 | 0.439151361 | 0.346898436 | -0.173746939 | 5.50E-08 | 5.18E-07 |
| UTR3 | PRDX5  | 11 | 64089278                                                                                                                                        | 1  | cg01708924                                                                                                                                                                                               | 0.572890435 | 0.479857544 | 0.392391168 | -0.180499267 | 5.36E-10 | 9.96E-09 |
| UTR3 | PRIMA1 | 14 | 94186558                                                                                                                                        | 1  | cg16577789                                                                                                                                                                                               | 0.398663235 | 0.2911601   | 0.217738141 | -0.180925094 | 6.37E-13 | 9.56E-11 |
| UTR3 | PRKAA2 | 1  | 57176315                                                                                                                                        | 1  | cg26052885                                                                                                                                                                                               | 0.707487685 | 0.612257206 | 0.490384005 | -0.21710368  | 9.94E-07 | 6.41E-06 |
| UTR3 | PRLHR  | 10 | 120353499                                                                                                                                       | 1  | cg24611996                                                                                                                                                                                               | 0.747502085 | 0.652230139 | 0.59015565  | -0.157346435 | 2.13E-07 | 1.68E-06 |
| UTR3 | PROCR  | 20 | 33765072                                                                                                                                        | 1  | cg18649632                                                                                                                                                                                               | 0.7443944   | 0.612527667 | 0.538257232 | -0.206137168 | 7.27E-10 | 1.29E-08 |
| UTR3 | PROK2  | 3  | 71820909                                                                                                                                        | 1  | cg22799510                                                                                                                                                                                               | 0.64998684  | 0.542825339 | 0.403688441 | -0.246298399 | 2.92E-08 | 2.99E-07 |
| UTR3 | PRSS27 | 16 | 2762569                                                                                                                                         | 1  | cg04880804                                                                                                                                                                                               | 0.68324347  | 0.613835367 | 0.482393786 | -0.200849684 | 1.40E-08 | 1.61E-07 |
| UTR3 | PRSS35 | 6  | 84234463                                                                                                                                        | 1  | cg06771958                                                                                                                                                                                               | 0.696766565 | 0.580780872 | 0.545259277 | -0.151507288 | 2.22E-06 | 1.32E-05 |
| UTR3 | PRSS8  | 16 | 31142991                                                                                                                                        | 1  | cg05106869                                                                                                                                                                                               | 0.660538735 | 0.566047767 | 0.486953523 | -0.173585212 | 1.55E-09 | 2.43E-08 |
| UTR3 | PRTG   | 15 | 55911779/5590992<br>0                                                                                                                           | 2  | cg05779057/cg10666<br>761                                                                                                                                                                                | 0.71053494  | 0.566879656 | 0.450721023 | -0.259813917 | 1.32E-10 | 3.39E-09 |
| UTR3 | PSD2   | 5  | 139223811                                                                                                                                       | 1  | cg08682153                                                                                                                                                                                               | 0.446859455 | 0.3336159   | 0.245687932 | -0.201171523 | 1.09E-07 | 9.36E-07 |
| UTR3 | PSG4   | 19 | 43697480                                                                                                                                        | 1  | cg21775122                                                                                                                                                                                               | 0.53125808  | 0.443652517 | 0.308219264 | -0.223038816 | 1.31E-09 | 2.12E-08 |
| UTR3 | PSMG3  | 7  | 1607247/1607146                                                                                                                                 | 2  | cg00294534/cg26035<br>201                                                                                                                                                                                | 0.51074825  | 0.402125539 | 0.316182009 | -0.194566241 | 1.66E-09 | 2.59E-08 |
| UTR3 | PTAFR  | 1  | 28474511                                                                                                                                        | 1  | cg24492886                                                                                                                                                                                               | 0.5502658   | 0.45833065  | 0.348911136 | -0.201354664 | 2.46E-12 | 2.35E-10 |
| UTR3 | PTGER3 | 1  | 71418388/7147273<br>8/71354374                                                                                                                  | 3  | cg12603671/cg16823<br>292/cg17888090                                                                                                                                                                     | 0.704299847 | 0.60999955  | 0.502212895 | -0.202086951 | 1.95E-09 | 2.98E-08 |
| UTR3 | PTHLH  | 12 | 28115804                                                                                                                                        | 1  | cg14210985                                                                                                                                                                                               | 0.69959215  | 0.602720411 | 0.392690036 | -0.306902114 | 8.16E-14 | 2.58E-11 |
| UTR3 | PTPLA  | 10 | 17632231                                                                                                                                        | 1  | cg05341848                                                                                                                                                                                               | 0.657783465 | 0.602039561 | 0.45174495  | -0.206038515 | 3.70E-07 | 2.71E-06 |
| UTR3 | PTPN1  | 20 | 49200925                                                                                                                                        | 1  | cg05093113                                                                                                                                                                                               | 0.617901985 | 0.517374794 | 0.43718335  | -0.180718635 | 1.40E-10 | 3.49E-09 |
| UTR3 | PTPN5  | 11 | 18750217                                                                                                                                        | 1  | cg22404856                                                                                                                                                                                               | 0.750027185 | 0.677279456 | 0.578705609 | -0.171321576 | 2.40E-06 | 1.41E-05 |
| UTR3 | PTPRM  | 18 | 8406757                                                                                                                                         | 1  | cg12412030                                                                                                                                                                                               | 0.65769117  | 0.568988494 | 0.477869623 | -0.179821547 | 2.75E-07 | 2.10E-06 |
| UTR3 | PTPRN  | 2  | 220154779                                                                                                                                       | 1  | cg03398156                                                                                                                                                                                               | 0.648929025 | 0.545501933 | 0.461875532 | -0.187053493 | 1.36E-10 | 3.42E-09 |

|      |          |    |                                                        |   |                                                                |             |             |             |              |             |             |
|------|----------|----|--------------------------------------------------------|---|----------------------------------------------------------------|-------------|-------------|-------------|--------------|-------------|-------------|
| UTR3 | PURG     | 8  | 30888801/3085356<br>4/30853662/308889 4<br>25          |   | cg02638909/cg04756<br>577/cg14212788/cg1<br>8907656            | 0.667355732 | 0.556125078 | 0.424619926 | -0.242735806 | 9.67E-12    | 5.71E-10    |
| UTR3 | PXDN     | 2  | 1637068                                                | 1 | cg10888111                                                     | 0.8753676   | 0.59430805  | 0.438202605 | -0.437164995 | 4.79E-15    | 7.46E-12    |
| UTR3 | PYDC1    | 16 | 31228059/3122741<br>1/31227884/312274 5<br>97/31227515 |   | cg00133595/cg03255<br>128/cg07275305/cg0<br>9921810/cg18682103 | 0.161289494 | 0.214000818 | 0.341226319 | 0.179936826  | 4.72E-05    | 0.000199739 |
| UTR3 | RAB24    | 5  | 176728620                                              | 1 | cg18128495                                                     | 0.604185895 | 0.4956448   | 0.414519105 | -0.18966679  | 3.88E-11    | 1.50E-09    |
| UTR3 | RAB6B    | 3  | 133545640                                              | 1 | cg26466524                                                     | 0.728497465 | 0.640354644 | 0.484425677 | -0.244071788 | 1.46E-10    | 3.63E-09    |
| UTR3 | RABL5    | 7  | 100958103                                              | 1 | cg02892258                                                     | 0.83085088  | 0.759864572 | 0.64520455  | -0.18564633  | 9.58E-07    | 6.18E-06    |
| UTR3 | RAG1     | 11 | 36599110                                               | 1 | cg08285589                                                     | 0.45408164  | 0.376545589 | 0.285275132 | -0.168806508 | 5.99E-11    | 2.00E-09    |
| UTR3 | RASGEF1C | 5  | 179528386                                              | 1 | cg25951075                                                     | 0.53506495  | 0.429875817 | 0.298831155 | -0.236233795 | 4.29E-15    | 7.46E-12    |
| UTR3 | RASSF8   | 12 | 26232255/2622217<br>8                                  | 2 | cg05990101/cg24674<br>577                                      | 0.770448655 | 0.651536033 | 0.559494055 | -0.2109546   | 4.12E-07    | 2.99E-06    |
| UTR3 | RAX      | 18 | 56935937/5693544<br>6/56935013/569351 5<br>99/56934834 |   | cg07099161/cg07835<br>051/cg12083217/cg1<br>2605662/cg26775191 | 0.238080271 | 0.320172294 | 0.453806529 | 0.215726258  | 1.12E-06    | 7.11E-06    |
| UTR3 | RBM12B   | 8  | 94744382                                               | 1 | cg16659470                                                     | 0.567832935 | 0.47602625  | 0.408443918 | -0.159389017 | 2.07E-08    | 2.23E-07    |
| UTR3 | RBMXL2   | 11 | 7112356                                                | 1 | cg06176750                                                     | 0.652383075 | 0.45420675  | 0.274610925 | -0.37777215  | 7.01E-13    | 1.02E-10    |
| UTR3 | RBP7     | 1  | 10075991                                               | 1 | cg09162909                                                     | 0.51951704  | 0.43841815  | 0.35221425  | -0.16730279  | 1.70E-09    | 2.64E-08    |
| UTR3 | REEP6    | 19 | 1497483                                                | 1 | cg26921566                                                     | 0.615986405 | 0.488313083 | 0.406022827 | -0.209963578 | 4.04E-10    | 8.03E-09    |
| UTR3 | REPIN1   | 7  | 150070692                                              | 1 | cg10018233                                                     | 0.58904     | 0.474253811 | 0.427973573 | -0.161066427 | 2.15E-06    | 1.28E-05    |
| UTR3 | RFX2     | 19 | 5994823/5993794                                        | 2 | cg08023527/cg08675<br>117                                      | 0.75964104  | 0.654970739 | 0.593638441 | -0.166002599 | 1.99E-09    | 3.04E-08    |
| UTR3 | RGMA     | 15 | 93587701/9358797<br>8/93588137                         | 3 | cg05869601/cg15288<br>779/cg22111818                           | 0.717091573 | 0.620070083 | 0.505279123 | -0.21181245  | 2.03E-11    | 9.58E-10    |
| UTR3 | RGS11    | 16 | 318900/318694/318<br>717                               | 3 | cg08735550/cg09192<br>940/cg09937849                           | 0.597262583 | 0.484749997 | 0.390714911 | -0.206547671 | 8.95E-11    | 2.55E-09    |
| UTR3 | RGS22    | 8  | 100974617                                              | 1 | cg01487694                                                     | 0.659987835 | 0.569470694 | 0.442498118 | -0.217489717 | 1.72E-09    | 2.66E-08    |
| UTR3 | RGS4     | 1  | 163044231/163046<br>549                                | 2 | cg07835293/cg11754<br>482                                      | 0.813911165 | 0.794015733 | 0.648526645 | -0.16538452  | 0.000543752 | 0.001781727 |
| UTR3 | RGS5     | 1  | 163113390                                              | 1 | cg10780638                                                     | 0.675836345 | 0.576672406 | 0.415553482 | -0.260282863 | 2.21E-09    | 3.30E-08    |
| UTR3 | RGS7BP   | 5  | 63907206                                               | 1 | cg26655294                                                     | 0.42050641  | 0.321961467 | 0.251556368 | -0.168950042 | 4.56E-12    | 3.57E-10    |
| UTR3 | RHO      | 3  | 129252584                                              | 1 | cg26283480                                                     | 0.781149465 | 0.684512406 | 0.568303577 | -0.212845888 | 2.52E-08    | 2.65E-07    |
| UTR3 | RHOB     | 2  | 20648194/2064858<br>0/20647987                         | 3 | cg16258854/cg25432<br>336/cg25840926                           | 0.58166411  | 0.462718739 | 0.3753929   | -0.20627121  | 2.76E-10    | 5.98E-09    |
| UTR3 | RHOJ     | 14 | 63757917                                               | 1 | cg24186774                                                     | 0.68639383  | 0.515430683 | 0.367702455 | -0.318691375 | 2.11E-11    | 9.86E-10    |

|      |         |    |                     |   |                       |             |             |             |              |             |             |
|------|---------|----|---------------------|---|-----------------------|-------------|-------------|-------------|--------------|-------------|-------------|
| UTR3 | RIC3    | 11 | 8128361             | 1 | cg03054541            | 0.794465585 | 0.738012383 | 0.564055195 | -0.23041039  | 9.79E-06    | 4.89E-05    |
| UTR3 | RIMKLB  | 12 | 8926941             | 1 | cg05837753            | 0.83553775  | 0.776733867 | 0.6599501   | -0.17558765  | 0.000524541 | 0.001725981 |
| UTR3 | RIMS2   | 8  | 105264286           | 1 | cg07664999            | 0.5521154   | 0.373942011 | 0.249843391 | -0.302272009 | 1.13E-12    | 1.36E-10    |
| UTR3 | RNASE1  | 14 | 21269744            | 1 | cg10197238            | 0.398412265 | 0.2997561   | 0.221241768 | -0.177170497 | 5.05E-12    | 3.85E-10    |
| UTR3 | RNASE9  | 14 | 21024443            | 1 | cg24162270            | 0.63467593  | 0.547864767 | 0.472713227 | -0.161962703 | 1.60E-05    | 7.57E-05    |
| UTR3 | RNF165  | 18 | 44038721            | 1 | cg11877105            | 0.50449169  | 0.416397011 | 0.334985809 | -0.169505881 | 1.34E-10    | 3.42E-09    |
| UTR3 | RNF19B  | 1  | 33402454            | 1 | cg22163472            | 0.667426105 | 0.562308978 | 0.4733737   | -0.194052405 | 1.45E-12    | 1.54E-10    |
| UTR3 | RNF207  | 1  | 6279843             | 1 | cg26611832            | 0.69299201  | 0.582450494 | 0.522792141 | -0.170199869 | 2.41E-13    | 5.50E-11    |
| UTR3 | RPH3A   | 12 | 113335032           | 1 | cg07230786            | 0.629925275 | 0.545767956 | 0.467143755 | -0.16278152  | 1.69E-05    | 7.96E-05    |
| UTR3 | RPRML   | 17 | 45055836/45056008   | 2 | cg20129313/cg22674412 | 0.069754249 | 0.064663847 | 0.228397823 | 0.158643574  | 0.001783286 | 0.005114359 |
| UTR3 | RPS6KA5 | 14 | 91338327            | 1 | cg05018835            | 0.655207325 | 0.541948989 | 0.42542635  | -0.229780975 | 2.79E-12    | 2.48E-10    |
| UTR3 | RRBP1   | 20 | 17594530            | 1 | cg15815375            | 0.611846605 | 0.511149283 | 0.453310959 | -0.158535646 | 2.79E-11    | 1.16E-09    |
| UTR3 | RSPO1   | 1  | 38077461            | 1 | cg12413421            | 0.61851534  | 0.50195305  | 0.36762805  | -0.25088729  | 2.82E-10    | 6.08E-09    |
| UTR3 | RSPO3   | 6  | 127517608           | 1 | cg10997634            | 0.747242355 | 0.633884561 | 0.500761991 | -0.246480364 | 3.34E-08    | 3.36E-07    |
| UTR3 | RUFY4   | 2  | 218955163           | 1 | cg11417360            | 0.62479257  | 0.572725617 | 0.442641555 | -0.182151015 | 3.02E-06    | 1.73E-05    |
| UTR3 | RWDD2A  | 6  | 83906123            | 1 | cg19570102            | 0.69648424  | 0.61691295  | 0.531959577 | -0.164524663 | 5.75E-10    | 1.06E-08    |
| UTR3 | RXFP2   | 13 | 32376637            | 1 | cg09573371            | 0.61305552  | 0.558240289 | 0.386196736 | -0.226858784 | 7.22E-09    | 9.01E-08    |
| UTR3 | RYR2    | 1  | 237996893           | 1 | cg19708201            | 0.68210385  | 0.549119272 | 0.416295409 | -0.265808441 | 1.21E-09    | 1.98E-08    |
| UTR3 | S100A5  | 1  | 153509635           | 1 | cg09152105            | 0.704648195 | 0.575162133 | 0.485428073 | -0.219220122 | 2.61E-13    | 5.56E-11    |
| UTR3 | S1PR3   | 9  | 91618456            | 1 | cg14448588            | 0.680314215 | 0.5393611   | 0.436338945 | -0.24397527  | 1.86E-10    | 4.47E-09    |
| UTR3 | SACS    | 13 | 23904116            | 1 | cg24140343            | 0.86852772  | 0.730204833 | 0.484653191 | -0.383874529 | 1.92E-09    | 2.94E-08    |
| UTR3 | SALL2   | 14 | 21989279            | 1 | cg23140396            | 0.368932605 | 0.284841117 | 0.185871023 | -0.183061582 | 3.99E-14    | 1.46E-11    |
| UTR3 | SAMD13  | 1  | 84815929            | 1 | cg23925111            | 0.443203    | 0.3598256   | 0.272155945 | -0.171047055 | 1.50E-08    | 1.69E-07    |
| UTR3 | SCAI    | 9  | 127710572           | 1 | cg13478668            | 0.591154655 | 0.474107167 | 0.4245602   | -0.166594455 | 4.26E-10    | 8.42E-09    |
| UTR3 | SCFD2   | 4  | 53740030            | 1 | cg23814002            | 0.797317905 | 0.671405217 | 0.579690564 | -0.217627341 | 6.86E-07    | 4.63E-06    |
| UTR3 | SCGB3A1 | 5  | 180017227/180017195 | 2 | cg00480161/cg26270345 | 0.221320517 | 0.279332522 | 0.414866936 | 0.193546419  | 2.90E-05    | 0.000129366 |
| UTR3 | SCN11A  | 3  | 38888170            | 1 | cg03825810            | 0.505481805 | 0.389644972 | 0.316395118 | -0.189086687 | 5.42E-12    | 4.04E-10    |
| UTR3 | SCN2B   | 11 | 118036424           | 1 | cg04563671            | 0.79325773  | 0.732087461 | 0.617685795 | -0.175571935 | 4.88E-05    | 0.000205494 |
| UTR3 | SCNN1G  | 16 | 23227394            | 1 | cg00452252            | 0.67246135  | 0.637818306 | 0.480935632 | -0.191525718 | 9.57E-05    | 0.000375213 |
| UTR3 | SEC14L4 | 22 | 30885012            | 1 | cg23383138            | 0.577382695 | 0.499358072 | 0.386374682 | -0.191008013 | 9.91E-12    | 5.81E-10    |
| UTR3 | SELE    | 1  | 169693534           | 1 | cg18229820            | 0.669687885 | 0.515382478 | 0.47013515  | -0.199552735 | 3.93E-09    | 5.38E-08    |
| UTR3 | SELV    | 19 | 40009835            | 1 | cg07052524            | 0.61414098  | 0.452529678 | 0.299807617 | -0.314333363 | 2.94E-11    | 1.20E-09    |
| UTR3 | SEMA7A  | 15 | 74702956            | 1 | cg19160053            | 0.728831935 | 0.661563978 | 0.568706859 | -0.160125076 | 1.30E-05    | 6.30E-05    |
| UTR3 | SENP2   | 3  | 185348303           | 1 | cg25634041            | 0.453694935 | 0.35693205  | 0.27001695  | -0.183677985 | 4.79E-10    | 9.17E-09    |

|      |          |    |                                     |   |                                             |             |             |             |              |             |             |
|------|----------|----|-------------------------------------|---|---------------------------------------------|-------------|-------------|-------------|--------------|-------------|-------------|
| UTR3 | SENP7    | 3  | 101044447                           | 1 | cg27104413                                  | 0.69892936  | 0.62622235  | 0.547107736 | -0.151821624 | 4.79E-06    | 2.59E-05    |
| UTR3 | SERPINB7 | 18 | 61472145                            | 1 | cg21354912                                  | 0.748700435 | 0.671357806 | 0.569024427 | -0.179676008 | 5.21E-05    | 0.000218574 |
| UTR3 | SEZ6     | 17 | 27282064                            | 1 | cg15189764                                  | 0.65169493  | 0.545556856 | 0.497256227 | -0.154438703 | 3.06E-07    | 2.31E-06    |
| UTR3 | SFRS3    | 6  | 36570759                            | 1 | cg21205713                                  | 0.75566191  | 0.696384189 | 0.600782382 | -0.154879528 | 1.33E-05    | 6.42E-05    |
| UTR3 | SGCG     | 13 | 23898864                            | 1 | cg04591230                                  | 0.43407435  | 0.347811572 | 0.249075491 | -0.184998859 | 1.25E-14    | 7.46E-12    |
| UTR3 | SH2D4B   | 10 | 82404135                            | 1 | cg27421810                                  | 0.861564615 | 0.752647417 | 0.632606123 | -0.228958492 | 8.24E-09    | 1.01E-07    |
| UTR3 | SH2D7    | 15 | 78396318                            | 1 | cg13415795                                  | 0.595601055 | 0.678444606 | 0.756488127 | 0.160887072  | 1.36E-08    | 1.57E-07    |
| UTR3 | SH3GL3   | 15 | 84287328                            | 1 | cg15564896                                  | 0.564724095 | 0.475488361 | 0.405425577 | -0.159298518 | 4.52E-06    | 2.46E-05    |
| UTR3 | SHISA3   | 4  | 42403471                            | 1 | cg11065575                                  | 0.509154205 | 0.393758089 | 0.311977418 | -0.197176787 | 5.56E-11    | 1.91E-09    |
| UTR3 | SIAH3    | 13 | 46355841                            | 1 | cg26020695                                  | 0.47884079  | 0.394052389 | 0.316308291 | -0.162532499 | 1.62E-10    | 3.98E-09    |
| UTR3 | SIDT2    | 11 | 117068115                           | 1 | cg11029270                                  | 0.61011441  | 0.517128906 | 0.445052723 | -0.165061687 | 7.35E-09    | 9.13E-08    |
| UTR3 | SIGLEC5  | 19 | 52114809                            | 1 | cg03541909                                  | 0.628039235 | 0.496249844 | 0.3628437   | -0.265195535 | 1.14E-10    | 3.02E-09    |
| UTR3 | SIGLEC8  | 19 | 51955472                            | 1 | cg26980954                                  | 0.60280769  | 0.465458428 | 0.333433918 | -0.269373772 | 1.89E-11    | 9.08E-10    |
| UTR3 | SIM1     | 6  | 100836916                           | 1 | cg24544512                                  | 0.570116665 | 0.520291622 | 0.357163086 | -0.212953579 | 4.74E-11    | 1.75E-09    |
| UTR3 | SIRPB1   | 20 | 1546019/1578550                     | 2 | cg26616780/cg27365103                       | 0.631637693 | 0.490402319 | 0.349350298 | -0.282287395 | 1.16E-14    | 7.46E-12    |
| UTR3 | SIRPD    | 20 | 1514929                             | 1 | cg00472837                                  | 0.70686384  | 0.541445233 | 0.422869095 | -0.283994745 | 3.46E-12    | 2.97E-10    |
| UTR3 | SIRT6    | 19 | 4174165                             | 1 | cg01983454                                  | 0.60129668  | 0.482842233 | 0.388618195 | -0.212678485 | 2.89E-11    | 1.18E-09    |
| UTR3 | SIX3     | 2  | 45172201/45172169/45172265/45172972 | 4 | cg03717442/cg08696165/cg16509777/cg23245620 | 0.319616795 | 0.473606983 | 0.553462845 | 0.23384605   | 3.36E-05    | 0.00014787  |
| UTR3 | SIX4     | 14 | 61176368                            | 1 | cg13065475                                  | 0.74852735  | 0.639871172 | 0.55052355  | -0.1980038   | 1.98E-06    | 1.19E-05    |
| UTR3 | SIX6     | 14 | 60978094/60978275/60978161          | 3 | cg00859478/cg11126767/cg14507337            | 0.288065885 | 0.357652443 | 0.481920539 | 0.193854654  | 0.000199984 | 0.000724099 |
| UTR3 | SLC10A7  | 4  | 147177156                           | 1 | cg11875744                                  | 0.77400594  | 0.662061472 | 0.606630064 | -0.167375876 | 7.33E-09    | 9.13E-08    |
| UTR3 | SLC11A2  | 12 | 51381135                            | 1 | cg20872692                                  | 0.576334385 | 0.461350233 | 0.378714923 | -0.197619462 | 2.29E-10    | 5.20E-09    |
| UTR3 | SLC12A5  | 20 | 44687454/44686493/44687092/44687730 | 4 | cg01460436/cg04403809/cg07060233/cg20003638 | 0.478972619 | 0.565761801 | 0.678626355 | 0.199653736  | 1.97E-07    | 1.57E-06    |
| UTR3 | SLC14A2  | 18 | 43262611                            | 1 | cg15090262                                  | 0.728026735 | 0.643834861 | 0.466792805 | -0.26123393  | 6.49E-09    | 8.30E-08    |
| UTR3 | SLC15A1  | 13 | 99336246                            | 1 | cg02319149                                  | 0.8117625   | 0.736890311 | 0.639021964 | -0.172740536 | 1.36E-07    | 1.14E-06    |
| UTR3 | SLC16A14 | 2  | 230899944                           | 1 | cg10277956                                  | 0.788265805 | 0.700207411 | 0.575269618 | -0.212996187 | 6.57E-07    | 4.46E-06    |
| UTR3 | SLC16A7  | 12 | 60174815                            | 1 | cg10812247                                  | 0.517918565 | 0.393064122 | 0.317389909 | -0.200528656 | 2.22E-11    | 1.00E-09    |
| UTR3 | SLC18A3  | 10 | 50820604                            | 1 | cg07637213                                  | 0.48770187  | 0.543272439 | 0.639293005 | 0.151591135  | 3.51E-09    | 4.88E-08    |
| UTR3 | SLC1A3   | 5  | 36686601/36608769                   | 2 | cg17839232/cg20646491                       | 0.756741325 | 0.652204122 | 0.534740682 | -0.222000643 | 2.10E-06    | 1.25E-05    |
| UTR3 | SLC22A17 | 14 | 23815798                            | 1 | cg08243827                                  | 0.606713025 | 0.535553039 | 0.456229541 | -0.150483484 | 3.23E-08    | 3.26E-07    |



|      |          |    |                                                                                                                         |    |                                                                                                                                                                      |             |             |             |              |             |             |
|------|----------|----|-------------------------------------------------------------------------------------------------------------------------|----|----------------------------------------------------------------------------------------------------------------------------------------------------------------------|-------------|-------------|-------------|--------------|-------------|-------------|
| UTR3 | SLC26A4  | 7  | 107357932                                                                                                               | 1  | cg06535968                                                                                                                                                           | 0.727286615 | 0.557762561 | 0.438293591 | -0.288993024 | 6.73E-12    | 4.58E-10    |
| UTR3 | SLC29A4  | 7  | 5343176/5342805/5342893/5343586/5343660/5342933                                                                         | 6  | cg01185093/cg16645977/cg17230640/cg21432302/cg24340453/cg27637597                                                                                                    | 0.716108154 | 0.580232582 | 0.468833491 | -0.247274663 | 1.41E-13    | 3.88E-11    |
| UTR3 | SLC30A3  | 2  | 27478146                                                                                                                | 1  | cg24594459                                                                                                                                                           | 0.39501735  | 0.305603539 | 0.238974445 | -0.156042905 | 4.12E-10    | 8.16E-09    |
| UTR3 | SLC30A8  | 8  | 118186764                                                                                                               | 1  | cg05548393                                                                                                                                                           | 0.742550435 | 0.703538072 | 0.572445318 | -0.170105117 | 0.000955994 | 0.00295066  |
| UTR3 | SLC38A10 | 17 | 79218991/79224770                                                                                                       | 2  | cg19030682/cg27529668                                                                                                                                                | 0.61604824  | 0.506077194 | 0.407657068 | -0.208391172 | 1.94E-10    | 4.61E-09    |
| UTR3 | SLC4A10  | 2  | 162838364                                                                                                               | 1  | cg06581825                                                                                                                                                           | 0.539182305 | 0.419763311 | 0.330044405 | -0.2091379   | 4.48E-11    | 1.68E-09    |
| UTR3 | SLC6A13  | 12 | 329792                                                                                                                  | 1  | cg13880565                                                                                                                                                           | 0.79351325  | 0.754650639 | 0.63118115  | -0.1623321   | 9.38E-06    | 4.71E-05    |
| UTR3 | SLC8A3   | 14 | 70512583                                                                                                                | 1  | cg11012557                                                                                                                                                           | 0.542311495 | 0.436973083 | 0.3500929   | -0.192218595 | 2.42E-12    | 2.34E-10    |
| UTR3 | SLCO2B1  | 11 | 74916485                                                                                                                | 1  | cg08597735                                                                                                                                                           | 0.576106395 | 0.450473217 | 0.369914945 | -0.20619145  | 1.16E-11    | 6.45E-10    |
| UTR3 | SLCO4C1  | 5  | 101570551                                                                                                               | 1  | cg00630480                                                                                                                                                           | 0.55854585  | 0.483318517 | 0.393163405 | -0.165382445 | 2.16E-10    | 4.97E-09    |
| UTR3 | SLFN13   | 17 | 33763575                                                                                                                | 1  | cg15577706                                                                                                                                                           | 0.766537865 | 0.695474433 | 0.566322718 | -0.200215147 | 5.82E-07    | 4.08E-06    |
| UTR3 | SLITRK1  | 13 | 84453280/84452994                                                                                                       | 2  | cg04095724/cg18789918                                                                                                                                                | 0.368923134 | 0.482578065 | 0.615613181 | 0.246690047  | 4.51E-09    | 6.05E-08    |
| UTR3 | SNAP25   | 20 | 10286857                                                                                                                | 1  | cg03569068                                                                                                                                                           | 0.791877555 | 0.749251044 | 0.58704295  | -0.204834605 | 9.56E-05    | 0.000374923 |
| UTR3 | SNCB     | 5  | 176047485                                                                                                               | 1  | cg20960405                                                                                                                                                           | 0.22901774  | 0.248642821 | 0.392675547 | 0.163657807  | 0.00282111  | 0.007648093 |
| UTR3 | SOD3     | 4  | 24802340/24802387                                                                                                       | 2  | cg13096007/cg16170614                                                                                                                                                | 0.530277665 | 0.630692189 | 0.7558146   | 0.225536935  | 6.70E-10    | 1.21E-08    |
| UTR3 | SOHLH1   | 9  | 138585730                                                                                                               | 1  | cg13708759                                                                                                                                                           | 0.51684011  | 0.409615883 | 0.329370641 | -0.187469469 | 2.52E-12    | 2.36E-10    |
| UTR3 | SOS1     | 2  | 39209066                                                                                                                | 1  | cg26354721                                                                                                                                                           | 0.837476245 | 0.748319156 | 0.622192973 | -0.215283272 | 4.03E-07    | 2.93E-06    |
| UTR3 | SOX1     | 13 | 112724583/112723581/112723477/112723421/112725903/112725605/112723226/112724270/112724245/112724221                     | 11 | cg00073003/cg01236132/cg04047221/cg04865691/cg06488256/cg10245273/cg14842777/cg21385666/cg23668285/cg25476766/cg26151467                                             | 0.337810676 | 0.382575293 | 0.511167791 | 0.173357115  | 8.95E-06    | 4.52E-05    |
| UTR3 | SOX11    | 2  | 5837429/5837929/5836366/5835853/5838258/5837348/5836256/5836111/5837057/5834638/5836231/5840827/5837002/5836713/5836181 | 15 | cg00078318/cg03594550/cg04043795/cg06173889/cg06830064/cg11716272/cg14776201/cg15034345/cg15989068/cg16330247/cg18897632/cg19958021/cg20927661/cg23668184/cg26659079 | 0.467691548 | 0.550396922 | 0.676593494 | 0.208901946  | 1.31E-10    | 3.36E-09    |

|      |            |    |                               |   |                                  |             |             |             |              |             |             |
|------|------------|----|-------------------------------|---|----------------------------------|-------------|-------------|-------------|--------------|-------------|-------------|
| UTR3 | SOX14      | 3  | 137484364                     | 1 | cg11630154                       | 0.140841972 | 0.192145647 | 0.298468921 | 0.15762695   | 0.001052853 | 0.003224264 |
| UTR3 | SOX17      | 8  | 55372569                      | 1 | cg25923240                       | 0.35625779  | 0.414395072 | 0.558034441 | 0.201776651  | 1.93E-05    | 9.05E-05    |
| UTR3 | SOX18      | 20 | 62679255                      | 1 | cg01355392                       | 0.39983349  | 0.285235394 | 0.230503318 | -0.169330172 | 2.20E-12    | 2.18E-10    |
| UTR3 | SOX5       | 12 | 23686149                      | 1 | cg27480819                       | 0.66852252  | 0.55698255  | 0.41917475  | -0.24934777  | 6.32E-08    | 5.83E-07    |
| UTR3 | SP7        | 12 | 53721673                      | 1 | cg16438602                       | 0.70590904  | 0.598383122 | 0.513132005 | -0.192777035 | 7.56E-07    | 5.06E-06    |
| UTR3 | SPATA22    | 17 | 3343601                       | 1 | cg24156983                       | 0.620195515 | 0.482483867 | 0.379743605 | -0.24045191  | 1.81E-13    | 4.62E-11    |
| UTR3 | SPATC1     | 8  | 145101998/145101671/145101833 | 3 | cg00423068/cg10145449/cg21624980 | 0.760303952 | 0.626422785 | 0.537273252 | -0.2230307   | 7.59E-12    | 5.03E-10    |
| UTR3 | SPERT      | 13 | 46288513                      | 1 | cg02134046                       | 0.67989703  | 0.54656715  | 0.496922505 | -0.182974525 | 6.19E-10    | 1.14E-08    |
| UTR3 | SPHK2      | 19 | 49133598/49133647/49133421    | 3 | cg02821871/cg17865555/cg21519787 | 0.545157895 | 0.449919575 | 0.343863241 | -0.201294654 | 5.04E-11    | 1.81E-09    |
| UTR3 | SPINK8     | 3  | 48348370                      | 1 | cg20734569                       | 0.352014678 | 0.253312878 | 0.162893441 | -0.189121236 | 5.73E-09    | 7.44E-08    |
| UTR3 | SPINLW1    | 20 | 44170643                      | 1 | cg16471362                       | 0.59868732  | 0.49599725  | 0.421673323 | -0.177013997 | 1.40E-07    | 1.16E-06    |
| UTR3 | SPINT1     | 15 | 41149780                      | 1 | cg04519327                       | 0.64893348  | 0.520424639 | 0.415018523 | -0.233914957 | 1.35E-10    | 3.42E-09    |
| UTR3 | SPOCK1     | 5  | 136314223                     | 1 | cg22612642                       | 0.445545335 | 0.296661761 | 0.209797259 | -0.235748076 | 2.56E-13    | 5.56E-11    |
| UTR3 | SPRR1B     | 1  | 153005121                     | 1 | cg02919982                       | 0.62953565  | 0.587374011 | 0.460579927 | -0.168955723 | 2.34E-05    | 0.000107533 |
| UTR3 | SPRR3      | 1  | 152976275                     | 1 | cg20671415                       | 0.649201945 | 0.525186383 | 0.439022373 | -0.210179572 | 1.94E-09    | 2.97E-08    |
| UTR3 | SPRY2      | 13 | 80910763                      | 1 | cg00185066                       | 0.58327754  | 0.492414972 | 0.37908555  | -0.20419199  | 1.10E-09    | 1.82E-08    |
| UTR3 | SPTA1      | 1  | 158581040                     | 1 | cg07048608                       | 0.759245825 | 0.651806039 | 0.53471755  | -0.224528275 | 1.77E-07    | 1.43E-06    |
| UTR3 | SRL        | 16 | 4241254                       | 1 | cg26591162                       | 0.60786137  | 0.45936075  | 0.367236064 | -0.240625306 | 7.08E-12    | 4.78E-10    |
| UTR3 | SRRM3      | 7  | 75916480                      | 1 | cg22519356                       | 0.64539845  | 0.577578344 | 0.492013514 | -0.153384936 | 9.14E-08    | 8.05E-07    |
| UTR3 | SRRM4      | 12 | 119595495                     | 1 | cg00700239                       | 0.57300562  | 0.428104583 | 0.306999132 | -0.266006488 | 3.00E-14    | 1.22E-11    |
| UTR3 | SSH3       | 11 | 67079729                      | 1 | cg05295023                       | 0.650486465 | 0.528351228 | 0.443207214 | -0.207279251 | 3.79E-11    | 1.48E-09    |
| UTR3 | SSPO       | 7  | 149530984                     | 1 | cg22537597                       | 0.504356695 | 0.408212011 | 0.315808609 | -0.188548086 | 9.60E-12    | 5.69E-10    |
| UTR3 | SSTR3      | 22 | 37602542                      | 1 | cg14757173                       | 0.62910349  | 0.518654156 | 0.445990623 | -0.183112867 | 3.69E-10    | 7.59E-09    |
| UTR3 | ST6GALNAC5 | 1  | 77529073                      | 1 | cg19369529                       | 0.639776235 | 0.564809994 | 0.459363145 | -0.18041309  | 1.23E-05    | 6.02E-05    |
| UTR3 | ST8SIA2    | 15 | 93010191                      | 1 | cg09389826                       | 0.784419935 | 0.693391206 | 0.6143188   | -0.170101135 | 4.05E-06    | 2.23E-05    |
| UTR3 | STAG3      | 7  | 99811980                      | 1 | cg09293122                       | 0.52275311  | 0.423486178 | 0.348278182 | -0.174474928 | 1.49E-10    | 3.69E-09    |
| UTR3 | STAT5B     | 17 | 40352975                      | 1 | cg21821388                       | 0.519414055 | 0.431267328 | 0.357459095 | -0.16195496  | 4.71E-10    | 9.07E-09    |
| UTR3 | SUSD2      | 22 | 24584744                      | 1 | cg12473943                       | 0.74540461  | 0.620133011 | 0.5533158   | -0.19208881  | 0.000102329 | 0.00039835  |
| UTR3 | SUSD5      | 3  | 33194171                      | 1 | cg17216807                       | 0.80492961  | 0.739345583 | 0.619362732 | -0.185566878 | 1.03E-05    | 5.11E-05    |
| UTR3 | SV2A       | 1  | 149875698                     | 1 | cg25277573                       | 0.760071305 | 0.699602906 | 0.608282505 | -0.1517888   | 2.52E-07    | 1.95E-06    |
| UTR3 | SYCE1      | 10 | 135367706                     | 1 | cg09480264                       | 0.57934362  | 0.467635794 | 0.333957527 | -0.245386093 | 1.44E-09    | 2.30E-08    |
| UTR3 | SYPL2      | 1  | 110024289                     | 1 | cg23091122                       | 0.549180325 | 0.415777306 | 0.300507227 | -0.248673098 | 1.23E-12    | 1.45E-10    |
| UTR3 | SYT10      | 12 | 33528782                      | 1 | cg03354810                       | 0.765560605 | 0.750931206 | 0.593719    | -0.171841605 | 9.86E-05    | 0.000385728 |

|      |          |    |                                                                |   |                                                                             |             |             |             |              |          |             |
|------|----------|----|----------------------------------------------------------------|---|-----------------------------------------------------------------------------|-------------|-------------|-------------|--------------|----------|-------------|
| UTR3 | TBC1D21  | 15 | 74181456                                                       | 1 | cg24361079                                                                  | 0.64517505  | 0.551851917 | 0.423762436 | -0.221412614 | 5.15E-07 | 3.66E-06    |
| UTR3 | TBPL1    | 6  | 134308414                                                      | 1 | cg18634443                                                                  | 0.40678245  | 0.304089117 | 0.240981486 | -0.165800964 | 1.29E-11 | 6.96E-10    |
| UTR3 | TBX2     | 17 | 59485894                                                       | 1 | cg27027242                                                                  | 0.4185352   | 0.515738144 | 0.615647514 | 0.197112314  | 1.08E-09 | 1.80E-08    |
| UTR3 | TCEA2    | 20 | 62703578                                                       | 1 | cg03044302                                                                  | 0.769019855 | 0.650798256 | 0.501712395 | -0.26730746  | 3.46E-08 | 3.45E-07    |
| UTR3 | TCF15    | 20 | 584773                                                         | 1 | cg02939767                                                                  | 0.5923177   | 0.34688905  | 0.227455723 | -0.364861977 | 1.97E-14 | 9.15E-12    |
| UTR3 | TCFL5    | 20 | 61473305                                                       | 1 | cg19907964                                                                  | 0.50225213  | 0.451843783 | 0.329425664 | -0.172826466 | 6.32E-08 | 5.83E-07    |
| UTR3 | TCHHL1   | 1  | 152056869                                                      | 1 | cg05388137                                                                  | 0.729877155 | 0.627862744 | 0.4650036   | -0.264873555 | 5.02E-09 | 6.61E-08    |
| UTR3 | TCL1B    | 14 | 96158915                                                       | 1 | cg01018864                                                                  | 0.53212782  | 0.4344983   | 0.366392832 | -0.165734988 | 5.51E-09 | 7.19E-08    |
| UTR3 | TCTEX1D1 | 1  | 67244062                                                       | 1 | cg10625686                                                                  | 0.60068317  | 0.54014705  | 0.365761418 | -0.234921752 | 1.30E-08 | 1.51E-07    |
| UTR3 | TEX14    | 17 | 56634222                                                       | 1 | cg09327586                                                                  | 0.512008345 | 0.47315485  | 0.353673445 | -0.1583349   | 8.82E-05 | 0.000348746 |
| UTR3 | TFAP2A   | 6  | 10398601/10398494                                              | 2 | cg04389897/cg04406454                                                       | 0.264736835 | 0.398388925 | 0.597863175 | 0.33312634   | 3.99E-08 | 3.91E-07    |
| UTR3 | TFEB     | 6  | 41652303                                                       | 1 | cg00216570                                                                  | 0.66345188  | 0.539049656 | 0.467721564 | -0.195730316 | 7.05E-11 | 2.20E-09    |
| UTR3 | TFF3     | 21 | 43732208                                                       | 1 | cg24057615                                                                  | 0.58838744  | 0.512388339 | 0.396972695 | -0.191414745 | 2.27E-10 | 5.19E-09    |
| UTR3 | TGFB1    | 19 | 41836950                                                       | 1 | cg04614483                                                                  | 0.5305956   | 0.442997583 | 0.375235268 | -0.155360332 | 2.74E-09 | 3.95E-08    |
| UTR3 | TH       | 11 | 2185376                                                        | 1 | cg26966083                                                                  | 0.630299115 | 0.516691461 | 0.435687214 | -0.194611901 | 1.59E-06 | 9.75E-06    |
| UTR3 | THSD7A   | 7  | 11412105                                                       | 1 | cg22383292                                                                  | 0.696334765 | 0.547514617 | 0.398341836 | -0.297992929 | 4.88E-10 | 9.30E-09    |
| UTR3 | TIMP2    | 17 | 76850266/76850277/76849181/76850256/76850052/76850198/76849093 | 7 | cg01502428/cg01761758/cg02969624/cg15010903/cg16347361/cg20761853/cg2737777 | 0.566670981 | 0.440428696 | 0.336183938 | -0.230487043 | 2.43E-12 | 2.34E-10    |
| UTR3 | TLL1     | 4  | 167022415                                                      | 1 | cg20743881                                                                  | 0.549580585 | 0.443231167 | 0.371497918 | -0.178082667 | 1.01E-06 | 6.52E-06    |
| UTR3 | TLL2     | 10 | 98126436                                                       | 1 | cg12801391                                                                  | 0.5492307   | 0.452564328 | 0.31710405  | -0.23212665  | 7.62E-12 | 5.03E-10    |
| UTR3 | TLX2     | 2  | 74743664/74743839/74743437                                     | 3 | cg03998104/cg14877896/cg21185289                                            | 0.505954352 | 0.599778024 | 0.702160758 | 0.196206406  | 2.91E-10 | 6.24E-09    |
| UTR3 | TM2D3    | 15 | 102182534                                                      | 1 | cg23049226                                                                  | 0.466942855 | 0.354317061 | 0.269929377 | -0.197013478 | 3.04E-12 | 2.67E-10    |
| UTR3 | TM4SF1   | 3  | 149086884                                                      | 1 | cg00244111                                                                  | 0.665859265 | 0.57247115  | 0.494130677 | -0.171728588 | 9.31E-10 | 1.59E-08    |
| UTR3 | TM4SF4   | 3  | 149220486                                                      | 1 | cg16954508                                                                  | 0.77612159  | 0.6388159   | 0.496524495 | -0.279597095 | 3.29E-10 | 6.86E-09    |
| UTR3 | TMBIM1   | 2  | 219139048                                                      | 1 | cg23569941                                                                  | 0.60695414  | 0.4826953   | 0.398226127 | -0.208728013 | 1.78E-11 | 8.63E-10    |
| UTR3 | TMC2     | 20 | 2622020                                                        | 1 | cg24848351                                                                  | 0.55852129  | 0.461947433 | 0.403025523 | -0.155495767 | 1.31E-05 | 6.36E-05    |
| UTR3 | TMC8     | 17 | 76138514                                                       | 1 | cg03596178                                                                  | 0.54725217  | 0.439526756 | 0.372952455 | -0.174299715 | 7.30E-09 | 9.09E-08    |
| UTR3 | TMCO5A   | 15 | 38243575                                                       | 1 | cg21629384                                                                  | 0.720481815 | 0.61869355  | 0.491287436 | -0.229194379 | 3.22E-07 | 2.41E-06    |
| UTR3 | TMEM130  | 7  | 98444410                                                       | 1 | cg00833441                                                                  | 0.60206195  | 0.531283794 | 0.402695609 | -0.199366341 | 1.94E-08 | 2.10E-07    |
| UTR3 | TMEM134  | 11 | 67231878                                                       | 1 | cg07303548                                                                  | 0.610202535 | 0.454796911 | 0.32130235  | -0.288900185 | 7.37E-13 | 1.04E-10    |
| UTR3 | TMEM155  | 4  | 122680946                                                      | 1 | cg16298202                                                                  | 0.79069576  | 0.724691622 | 0.556162114 | -0.234533646 | 1.91E-07 | 1.53E-06    |
| UTR3 | TMEM167B | 1  | 109637162/109639152                                            | 2 | cg05708073/cg07906745                                                       | 0.592705195 | 0.506202158 | 0.418934834 | -0.173770361 | 1.63E-11 | 8.16E-10    |

|      |           |    |                            |   |                                  |             |             |             |              |          |             |
|------|-----------|----|----------------------------|---|----------------------------------|-------------|-------------|-------------|--------------|----------|-------------|
| UTR3 | TMEM169   | 2  | 216966036                  | 1 | cg07660494                       | 0.64651965  | 0.498833772 | 0.392625705 | -0.253893945 | 1.01E-12 | 1.25E-10    |
| UTR3 | TMEM188   | 16 | 50069454                   | 1 | cg02254879                       | 0.569548405 | 0.442836317 | 0.343770914 | -0.225777491 | 2.51E-11 | 1.09E-09    |
| UTR3 | TMEM198   | 2  | 220415201/220414726        | 2 | cg03830936/cg06390613            | 0.667061355 | 0.585782472 | 0.485566095 | -0.18149526  | 2.41E-09 | 3.57E-08    |
| UTR3 | TMEM215   | 9  | 32789031                   | 1 | cg14279416                       | 0.73243203  | 0.587047889 | 0.425299618 | -0.307132412 | 2.65E-08 | 2.76E-07    |
| UTR3 | TMEM26    | 10 | 63167726                   | 1 | cg18237739                       | 0.69384678  | 0.580288889 | 0.424146123 | -0.269700657 | 3.08E-10 | 6.56E-09    |
| UTR3 | TMEM30A   | 6  | 75965559                   | 1 | cg11887083                       | 0.743614665 | 0.573787589 | 0.550888273 | -0.192726392 | 1.68E-09 | 2.62E-08    |
| UTR3 | TMEM33    | 4  | 41961749                   | 1 | cg18811916                       | 0.681134775 | 0.563145528 | 0.472287555 | -0.20884722  | 1.61E-11 | 8.11E-10    |
| UTR3 | TMEM40    | 3  | 12776107                   | 1 | cg20504993                       | 0.562520945 | 0.486443283 | 0.348545273 | -0.213975672 | 5.34E-09 | 7.01E-08    |
| UTR3 | TMEM74    | 8  | 109796144                  | 1 | cg20189036                       | 0.784316265 | 0.634820772 | 0.494780027 | -0.289536238 | 8.09E-07 | 5.35E-06    |
| UTR3 | TMEM95    | 17 | 7260326                    | 1 | cg14288903                       | 0.699415005 | 0.625491756 | 0.519510509 | -0.179904496 | 6.03E-09 | 7.77E-08    |
| UTR3 | TMPRSS11A | 4  | 68776652                   | 1 | cg26673722                       | 0.59197598  | 0.424100256 | 0.300292691 | -0.291683289 | 8.31E-12 | 5.32E-10    |
| UTR3 | TMX2      | 11 | 57508416                   | 1 | cg13305186                       | 0.3831515   | 0.28445415  | 0.226755355 | -0.156396145 | 4.93E-11 | 1.78E-09    |
| UTR3 | TNFRSF4   | 1  | 1146777/1146903            | 2 | cg09503311/cg20544186            | 0.8360821   | 0.697237156 | 0.600139464 | -0.235942636 | 3.56E-15 | 7.46E-12    |
| UTR3 | TNFRSF8   | 1  | 12204096/12203571/12203751 | 3 | cg06853894/cg09247175/cg24492058 | 0.31410533  | 0.218858667 | 0.15418385  | -0.15992148  | 6.85E-09 | 8.67E-08    |
| UTR3 | TNFSF12   | 17 | 7460690                    | 1 | cg13829089                       | 0.54887827  | 0.442739328 | 0.355842995 | -0.193035275 | 6.46E-09 | 8.27E-08    |
| UTR3 | TNIP3     | 4  | 122053520                  | 1 | cg20146506                       | 0.72038511  | 0.602405844 | 0.503328627 | -0.217056483 | 2.81E-08 | 2.90E-07    |
| UTR3 | TNNC1     | 3  | 52485216                   | 1 | cg12349422                       | 0.66803184  | 0.543307239 | 0.40992175  | -0.25811009  | 4.33E-12 | 3.48E-10    |
| UTR3 | TOB1      | 17 | 48939676                   | 1 | cg13119853                       | 0.55585124  | 0.453988844 | 0.36159225  | -0.19425899  | 3.86E-10 | 7.89E-09    |
| UTR3 | TPH2      | 12 | 72426134                   | 1 | cg19530293                       | 0.74046647  | 0.6805497   | 0.549066959 | -0.191399511 | 5.77E-06 | 3.06E-05    |
| UTR3 | TPRG1     | 3  | 189040394                  | 1 | cg21772826                       | 0.597525175 | 0.487125761 | 0.396945659 | -0.200579516 | 1.43E-07 | 1.18E-06    |
| UTR3 | TPRX1     | 19 | 48304772                   | 1 | cg15198344                       | 0.735594995 | 0.64541555  | 0.577616291 | -0.157978704 | 6.29E-06 | 3.30E-05    |
| UTR3 | TPSD1     | 16 | 1308385                    | 1 | cg09639264                       | 0.540632595 | 0.449670111 | 0.376932359 | -0.163700236 | 8.65E-11 | 2.49E-09    |
| UTR3 | TPSG1     | 16 | 1271741                    | 1 | cg03553819                       | 0.68871236  | 0.539859583 | 0.398461127 | -0.290251233 | 1.44E-12 | 1.54E-10    |
| UTR3 | TRERF1    | 6  | 42194691                   | 1 | cg05264377                       | 0.526854895 | 0.4192109   | 0.336164036 | -0.190690859 | 4.76E-10 | 9.14E-09    |
| UTR3 | TRH       | 3  | 129696735                  | 1 | cg15109144                       | 0.771078315 | 0.706492244 | 0.6070087   | -0.164069615 | 9.89E-05 | 0.000386649 |
| UTR3 | TRIM71    | 3  | 32933637                   | 1 | cg17980786                       | 0.568945865 | 0.451060394 | 0.374609041 | -0.194336824 | 1.10E-07 | 9.42E-07    |
| UTR3 | TRIM9     | 14 | 51463130/51443494          | 2 | cg14837480/cg23574924            | 0.772739693 | 0.697459689 | 0.565641925 | -0.207097768 | 2.40E-06 | 1.41E-05    |
| UTR3 | TRIML2    | 4  | 189012434                  | 1 | cg21529532                       | 0.72318953  | 0.6361933   | 0.564212345 | -0.158977185 | 2.03E-06 | 1.22E-05    |
| UTR3 | TRPC6     | 11 | 101323578                  | 1 | cg04554505                       | 0.596598235 | 0.52333025  | 0.414612886 | -0.181985349 | 3.86E-05 | 0.000167114 |
| UTR3 | TRPM1     | 15 | 31293713                   | 1 | cg21826258                       | 0.754437845 | 0.6462158   | 0.562919814 | -0.191518031 | 2.30E-08 | 2.45E-07    |
| UTR3 | TRPS1     | 8  | 116422845                  | 1 | cg18430465                       | 0.635776765 | 0.479868744 | 0.343752909 | -0.292023856 | 1.05E-14 | 7.46E-12    |
| UTR3 | TRPV4     | 12 | 110220970                  | 1 | cg01201138                       | 0.569929145 | 0.485829911 | 0.415730073 | -0.154199072 | 1.25E-08 | 1.46E-07    |
| UTR3 | TRPV6     | 7  | 142569053                  | 1 | cg08835464                       | 0.811856095 | 0.661889144 | 0.468637341 | -0.343218754 | 1.05E-10 | 2.85E-09    |

|      |         |    |                                                         |   |                                                                              |             |             |             |              |             |             |
|------|---------|----|---------------------------------------------------------|---|------------------------------------------------------------------------------|-------------|-------------|-------------|--------------|-------------|-------------|
| UTR3 | TSC22D1 | 13 | 45008447/45008526                                       | 2 | cg03097389/cg17600231                                                        | 0.80057919  | 0.620083178 | 0.527408509 | -0.273170681 | 7.36E-09    | 9.14E-08    |
| UTR3 | TSHZ2   | 20 | 52029943/52036204                                       | 2 | cg07333305/cg16499956                                                        | 0.57347573  | 0.496967528 | 0.388373289 | -0.185102441 | 1.81E-07    | 1.46E-06    |
| UTR3 | TSPYL5  | 8  | 98288616/98286872/98288091                              | 3 | cg18458131/cg19653425/cg24512297                                             | 0.773494593 | 0.720154239 | 0.61222225  | -0.161272343 | 1.08E-06    | 6.90E-06    |
| UTR3 | TTC1    | 5  | 159492309                                               | 1 | cg14483162                                                                   | 0.471588795 | 0.370422428 | 0.290598891 | -0.180989904 | 1.09E-09    | 1.82E-08    |
| UTR3 | TTC33   | 5  | 40712757                                                | 1 | cg12455300                                                                   | 0.73764873  | 0.696041678 | 0.575416309 | -0.162232421 | 3.26E-07    | 2.44E-06    |
| UTR3 | TTYH3   | 7  | 2701567/2701419/2701802/2702851/2701641/2701636/2704368 | 7 | cg00035074/cg01370759/cg11411865/cg13676996/cg17337874/cg21452471/cg26282283 | 0.659954321 | 0.527734879 | 0.446803592 | -0.213150729 | 1.02E-11    | 5.83E-10    |
| UTR3 | TULP1   | 6  | 35465845/35466014                                       | 2 | cg04293930/cg26319579                                                        | 0.44197854  | 0.496148411 | 0.594964123 | 0.152967583  | 2.30E-05    | 0.000105872 |
| UTR3 | TWIST1  | 7  | 19155806/19155785/19156086                              | 3 | cg04043591/cg13588800/cg20498685                                             | 0.194545309 | 0.287736599 | 0.410565572 | 0.216020263  | 0.000226444 | 0.000812037 |
| UTR3 | TXNL4A  | 18 | 77733105                                                | 1 | cg26501139                                                                   | 0.598339155 | 0.456598328 | 0.394632645 | -0.20370651  | 1.05E-10    | 2.85E-09    |
| UTR3 | UBASH3B | 11 | 122684258                                               | 1 | cg20249071                                                                   | 0.547086215 | 0.458773394 | 0.342684191 | -0.204402024 | 2.10E-11    | 9.82E-10    |
| UTR3 | UBL4B   | 1  | 110656508                                               | 1 | cg09826973                                                                   | 0.640216855 | 0.561730622 | 0.474523291 | -0.165693564 | 3.40E-05    | 0.000149324 |
| UTR3 | UBQLN3  | 11 | 5528669                                                 | 1 | cg24832498                                                                   | 0.562355705 | 0.470788528 | 0.36332985  | -0.199025855 | 1.10E-10    | 2.92E-09    |
| UTR3 | UCN     | 2  | 27530363                                                | 1 | cg01454215                                                                   | 0.20537035  | 0.239092546 | 0.373542048 | 0.168171698  | 0.004350954 | 0.011206205 |
| UTR3 | UGT3A1  | 5  | 35954233                                                | 1 | cg17210837                                                                   | 0.50550368  | 0.341676628 | 0.250504545 | -0.254999135 | 1.21E-13    | 3.52E-11    |
| UTR3 | UNC119  | 17 | 26873903                                                | 1 | cg12118708                                                                   | 0.706433345 | 0.628256311 | 0.541395768 | -0.165037577 | 3.22E-07    | 2.41E-06    |
| UTR3 | UNC45B  | 17 | 33514885                                                | 1 | cg00100703                                                                   | 0.51650594  | 0.406674367 | 0.308260473 | -0.208245467 | 1.03E-10    | 2.83E-09    |
| UTR3 | UNC5A   | 5  | 176307766/176307743/176307836                           | 3 | cg00513735/cg19742888/cg25389791                                             | 0.78115073  | 0.648408567 | 0.518298045 | -0.262852685 | 3.65E-11    | 1.44E-09    |
| UTR3 | UNC5C   | 4  | 96090330                                                | 1 | cg03024478                                                                   | 0.629980515 | 0.467550089 | 0.362151282 | -0.267829233 | 9.17E-12    | 5.57E-10    |
| UTR3 | UNC80   | 2  | 210863849                                               | 1 | cg06379340                                                                   | 0.68075015  | 0.568068217 | 0.450864395 | -0.229885755 | 2.21E-11    | 1.00E-09    |
| UTR3 | USH2A   | 1  | 216348212/215796556                                     | 2 | cg00972761/cg14964274                                                        | 0.671505375 | 0.496377683 | 0.362080127 | -0.309425248 | 6.22E-10    | 1.14E-08    |
| UTR3 | USP48   | 1  | 22005650                                                | 1 | cg15090198                                                                   | 0.62297305  | 0.498565689 | 0.422413009 | -0.200560041 | 1.01E-09    | 1.72E-08    |
| UTR3 | VAV1    | 19 | 6857265                                                 | 1 | cg27388680                                                                   | 0.70747611  | 0.6149019   | 0.555391132 | -0.152084978 | 0.000110957 | 0.000428063 |
| UTR3 | VCAM1   | 1  | 101204337                                               | 1 | cg22454770                                                                   | 0.65708404  | 0.505680606 | 0.373783205 | -0.283300835 | 2.48E-13    | 5.50E-11    |
| UTR3 | VDR     | 12 | 48237752/48235729                                       | 2 | cg14854850/cg21843272                                                        | 0.562221915 | 0.445455533 | 0.358124227 | -0.204097688 | 2.46E-10    | 5.47E-09    |
| UTR3 | VGLL2   | 6  | 117594700                                               | 1 | cg14664726                                                                   | 0.690373685 | 0.633957139 | 0.471073259 | -0.219300426 | 1.18E-07    | 1.00E-06    |
| UTR3 | VIL1    | 2  | 219314121                                               | 1 | cg18753162                                                                   | 0.754912775 | 0.612269017 | 0.521003364 | -0.233909411 | 8.15E-11    | 2.42E-09    |
| UTR3 | VMO1    | 17 | 4688683/4688629/4689165                                 | 3 | cg06419850/cg25913172/cg26605335                                             | 0.40557508  | 0.463299383 | 0.599079557 | 0.193504477  | 2.71E-09    | 3.91E-08    |

|      |         |    |                                                                                       |   |                                                                                              |             |             |             |              |             |             |
|------|---------|----|---------------------------------------------------------------------------------------|---|----------------------------------------------------------------------------------------------|-------------|-------------|-------------|--------------|-------------|-------------|
| UTR3 | VPS13B  | 8  | 100888033                                                                             | 1 | cg14537031                                                                                   | 0.601118815 | 0.4807892   | 0.432743027 | -0.168375788 | 2.30E-08    | 2.44E-07    |
| UTR3 | VPS37D  | 7  | 73085754                                                                              | 1 | cg15881597                                                                                   | 0.58335113  | 0.448357089 | 0.393737009 | -0.189614121 | 3.69E-12    | 3.09E-10    |
| UTR3 | VRK2    | 2  | 58386677                                                                              | 1 | cg00869533                                                                                   | 0.72031767  | 0.625852844 | 0.554663109 | -0.165654561 | 4.67E-10    | 9.02E-09    |
| UTR3 | VSIG10  | 12 | 118502338                                                                             | 1 | cg04910149                                                                                   | 0.496299095 | 0.413441511 | 0.320461118 | -0.175837977 | 3.94E-10    | 7.93E-09    |
| UTR3 | VSTM2L  | 20 | 36573019/3657274<br>1                                                                 | 2 | cg08580545/cg17071<br>589                                                                    | 0.71026816  | 0.62739535  | 0.549306468 | -0.160961692 | 2.58E-06    | 1.51E-05    |
| UTR3 | VTCN1   | 1  | 117689356                                                                             | 1 | cg27055365                                                                                   | 0.560425635 | 0.498825528 | 0.402554636 | -0.157870999 | 1.80E-07    | 1.45E-06    |
| UTR3 | VWCE    | 11 | 61025815                                                                              | 1 | cg02566157                                                                                   | 0.8282695   | 0.743458428 | 0.651661486 | -0.176608014 | 3.53E-06    | 1.98E-05    |
| UTR3 | WDFY4   | 10 | 50190845                                                                              | 1 | cg13623664                                                                                   | 0.834008095 | 0.705666794 | 0.573100736 | -0.260907359 | 9.33E-09    | 1.13E-07    |
| UTR3 | WDR64   | 1  | 241964727                                                                             | 1 | cg26823144                                                                                   | 0.801700945 | 0.701557506 | 0.651523436 | -0.150177509 | 0.000342985 | 0.001183919 |
| UTR3 | WFDC10B | 20 | 44313418                                                                              | 1 | cg11783356                                                                                   | 0.47643962  | 0.399614017 | 0.313590391 | -0.162849229 | 1.96E-07    | 1.57E-06    |
| UTR3 | WNT7B   | 22 | 46318272                                                                              | 1 | cg04197904                                                                                   | 0.719541385 | 0.618853678 | 0.521607541 | -0.197933844 | 7.51E-08    | 6.77E-07    |
| UTR3 | WNT9A   | 1  | 228109169                                                                             | 1 | cg24312489                                                                                   | 0.48887143  | 0.38302945  | 0.3364342   | -0.15243723  | 8.31E-11    | 2.44E-09    |
| UTR3 | WSCD2   | 12 | 108643267                                                                             | 1 | cg00736201                                                                                   | 0.56974541  | 0.461176661 | 0.382201986 | -0.187543424 | 3.52E-11    | 1.40E-09    |
| UTR3 | WWTR1   | 3  | 149238478                                                                             | 1 | cg02013148                                                                                   | 0.426941755 | 0.329094628 | 0.271385755 | -0.155556    | 1.28E-11    | 6.96E-10    |
| UTR3 | ZAP70   | 2  | 98356101                                                                              | 1 | cg14247635                                                                                   | 0.595653965 | 0.483205139 | 0.388860077 | -0.206793888 | 4.49E-13    | 7.38E-11    |
| UTR3 | ZAR1    | 4  | 48496404                                                                              | 1 | cg22289785                                                                                   | 0.576019555 | 0.424303894 | 0.342240323 | -0.233779232 | 8.36E-14    | 2.58E-11    |
| UTR3 | ZC3H3   | 8  | 144519832                                                                             | 1 | cg13169667                                                                                   | 0.545866815 | 0.445731672 | 0.362743305 | -0.18312351  | 1.55E-11    | 7.97E-10    |
| UTR3 | ZDHHC11 | 5  | 801195                                                                                | 1 | cg12184012                                                                                   | 0.812694455 | 0.725978833 | 0.651990073 | -0.160704382 | 3.21E-06    | 1.82E-05    |
| UTR3 | ZDHHC22 | 14 | 77600014                                                                              | 1 | cg09824615                                                                                   | 0.53622097  | 0.449662428 | 0.373386786 | -0.162834184 | 4.48E-09    | 6.01E-08    |
| UTR3 | ZEB2    | 2  | 145143754/145146<br>928                                                               | 2 | cg11432960/cg15345<br>847                                                                    | 0.685163138 | 0.601809033 | 0.518865961 | -0.166297176 | 4.94E-10    | 9.39E-09    |
| UTR3 | ZFC3H1  | 12 | 72004098                                                                              | 1 | cg14303478                                                                                   | 0.68915096  | 0.575068444 | 0.529261055 | -0.159889905 | 9.91E-06    | 4.94E-05    |
| UTR3 | ZFR2    | 19 | 3852027/3805860/3<br>804563                                                           | 3 | cg00860425/cg10000<br>139/cg24001611                                                         | 0.700147518 | 0.607497522 | 0.488412027 | -0.211735491 | 2.89E-10    | 6.22E-09    |
| UTR3 | ZHX2    | 8  | 123981935/123967<br>055                                                               | 2 | cg23822407/ch.8.244<br>2961R                                                                 | 0.48183225  | 0.388922167 | 0.301774691 | -0.180057559 | 5.31E-10    | 9.92E-09    |
| UTR3 | ZIC4    | 3  | 147106010/147106<br>635/147106561/147<br>105190/147106489/<br>147105899/147106<br>208 | 7 | cg00334063/cg04079<br>301/cg04556126/cg0<br>7406191/cg08889797<br>/cg12976081/cg2261<br>4239 | 0.297585039 | 0.351290028 | 0.463658664 | 0.166073626  | 3.34E-06    | 1.88E-05    |
| UTR3 | ZIC5    | 13 | 100616256/100617<br>055                                                               | 2 | cg02909158/cg20382<br>146                                                                    | 0.506346295 | 0.423631033 | 0.355191593 | -0.151154702 | 2.28E-07    | 1.79E-06    |
| UTR3 | ZIK1    | 19 | 58102673/5810276<br>9                                                                 | 2 | cg22981926/ch.19.18<br>99367R                                                                | 0.409624147 | 0.322419353 | 0.230786553 | -0.178837594 | 1.70E-14    | 8.65E-12    |

|      |         |    |                                                                                           |   |                                                                                                         |             |             |             |              |          |             |
|------|---------|----|-------------------------------------------------------------------------------------------|---|---------------------------------------------------------------------------------------------------------|-------------|-------------|-------------|--------------|----------|-------------|
| UTR3 | ZMIZ1   | 10 | 81075467/8107377<br>7/81075012/810754<br>78/81075067/81075 8<br>241/81075165/8107<br>5492 |   | cg03707696/cg04256<br>907/cg10313149/cg1<br>3676902/cg15733068<br>/cg19666787/cg2475<br>2964/cg26300785 | 0.552831145 | 0.451407439 | 0.395318809 | -0.157512336 | 8.11E-09 | 9.95E-08    |
| UTR3 | ZNF143  | 11 | 9549286                                                                                   | 1 | cg03668763                                                                                              | 0.535881705 | 0.451317167 | 0.349655895 | -0.18622581  | 1.12E-08 | 1.31E-07    |
| UTR3 | ZNF295  | 21 | 43406941                                                                                  | 1 | cg24950067                                                                                              | 0.72708904  | 0.603511872 | 0.495914045 | -0.231174995 | 1.38E-10 | 3.47E-09    |
| UTR3 | ZNF304  | 19 | 57870634                                                                                  | 1 | cg27366815                                                                                              | 0.80288294  | 0.655238128 | 0.481440823 | -0.321442117 | 2.22E-09 | 3.31E-08    |
| UTR3 | ZNF365  | 10 | 64160521/6423966<br>3/64431533                                                            | 3 | cg11685898/cg18632<br>745/cg27076160                                                                    | 0.74041805  | 0.660595711 | 0.569022259 | -0.171395791 | 8.50E-07 | 5.57E-06    |
| UTR3 | ZNF385B | 2  | 180307728                                                                                 | 1 | cg17100158                                                                                              | 0.765192235 | 0.710885594 | 0.552142264 | -0.213049971 | 2.67E-06 | 1.55E-05    |
| UTR3 | ZNF395  | 8  | 28205705                                                                                  | 1 | cg21330896                                                                                              | 0.52058207  | 0.627062844 | 0.688363945 | 0.167781875  | 5.27E-06 | 2.82E-05    |
| UTR3 | ZNF438  | 10 | 31133829                                                                                  | 1 | cg16124562                                                                                              | 0.68614135  | 0.560721561 | 0.483246173 | -0.202895177 | 2.13E-12 | 2.13E-10    |
| UTR3 | ZNF470  | 19 | 57091383                                                                                  | 1 | cg09287295                                                                                              | 0.713085055 | 0.532754622 | 0.3893565   | -0.323728555 | 2.82E-09 | 4.04E-08    |
| UTR3 | ZNF536  | 19 | 31048117                                                                                  | 1 | cg01094891                                                                                              | 0.63516337  | 0.543370939 | 0.46431855  | -0.17084482  | 7.07E-05 | 0.000286093 |
| UTR3 | ZNF546  | 19 | 40522655                                                                                  | 1 | cg15568892                                                                                              | 0.852869015 | 0.8065091   | 0.588532277 | -0.264336738 | 6.14E-08 | 5.70E-07    |
| UTR3 | ZNF549  | 19 | 58051563                                                                                  | 1 | cg21647626                                                                                              | 0.854609165 | 0.706595533 | 0.489310455 | -0.36529871  | 7.99E-11 | 2.40E-09    |
| UTR3 | ZNF589  | 3  | 48310544/4831089<br>7/48310616/483118 4<br>15                                             | 4 | cg01458495/cg05070<br>273/cg11307417/cg2<br>2533419                                                     | 0.708955989 | 0.602984474 | 0.548630463 | -0.160325526 | 2.66E-11 | 1.13E-09    |
| UTR3 | ZNF599  | 19 | 35249217                                                                                  | 1 | cg00019275                                                                                              | 0.628919475 | 0.501900294 | 0.400766259 | -0.228153216 | 2.64E-08 | 2.75E-07    |
| UTR3 | ZNF648  | 1  | 182025232/182024<br>689                                                                   | 2 | cg02494593/cg06361<br>127                                                                               | 0.741990248 | 0.66705845  | 0.572993318 | -0.168996929 | 4.63E-10 | 8.98E-09    |
| UTR3 | ZSCAN5A | 19 | 56732932                                                                                  | 1 | cg17767567                                                                                              | 0.730605915 | 0.561204944 | 0.473755191 | -0.256850724 | 7.03E-09 | 8.84E-08    |
| UTR3 | ZSCAN5B | 19 | 56701088                                                                                  | 1 | cg08835915                                                                                              | 0.60365558  | 0.512207739 | 0.406907455 | -0.196748125 | 4.53E-12 | 3.57E-10    |
| UTR3 | ZSWIM1  | 20 | 44513768                                                                                  | 1 | cg13780718                                                                                              | 0.41916749  | 0.281100889 | 0.237797105 | -0.181370385 | 4.88E-08 | 4.67E-07    |
| UTR3 | ZSWIM7  | 17 | 15880379                                                                                  | 1 | cg19815271                                                                                              | 0.383900145 | 0.259403756 | 0.210193373 | -0.173706772 | 6.36E-11 | 2.06E-09    |

Table S4. Differentially methylated regions (DMRs) between high grade adenoma (HGA) and low grade adenoma (LGA)

| Location | Gene      | CHR | MAPINFO                                                                                                                                                                                                                                                                          | Number of sites | Designed Probes                                                                                                                                                                                                                                                                                                                                    | Normal      | LGA         | HGA         | Different $\beta$ | P value  | Adjusted P value |
|----------|-----------|-----|----------------------------------------------------------------------------------------------------------------------------------------------------------------------------------------------------------------------------------------------------------------------------------|-----------------|----------------------------------------------------------------------------------------------------------------------------------------------------------------------------------------------------------------------------------------------------------------------------------------------------------------------------------------------------|-------------|-------------|-------------|-------------------|----------|------------------|
| TSS1500  | ADCYAP1R1 | 7   | 31091245/3109182                                                                                                                                                                                                                                                                 |                 | cg00256593/cg17617                                                                                                                                                                                                                                                                                                                                 |             |             |             |                   |          |                  |
| TSS1500  | ADCYAP1R1 | 7   | 5/31091813/31091718                                                                                                                                                                                                                                                              | 4               | 930/cg20165074/cg27076139                                                                                                                                                                                                                                                                                                                          | 0.121036297 | 0.162474221 | 0.386411279 | 0.223937058       | 2.62E-05 | 4.70E-03         |
| TSS1500  | AICDA     | 12  | 8766467/8766941                                                                                                                                                                                                                                                                  | 2               | cg10465202/cg27562311                                                                                                                                                                                                                                                                                                                              | 0.756507785 | 0.647370642 | 0.488450232 | -0.15892041       | 4.36E-05 | 4.88E-03         |
| TSS1500  | AQP5      | 12  | 50354962/5035499                                                                                                                                                                                                                                                                 |                 | cg03020208/cg08266                                                                                                                                                                                                                                                                                                                                 |             |             |             |                   |          |                  |
| TSS1500  | AQP5      | 12  | 8/50353951/50354840                                                                                                                                                                                                                                                              | 4               | 366/cg19220825/cg26328335                                                                                                                                                                                                                                                                                                                          | 0.300126293 | 0.318647856 | 0.47726052  | 0.158612664       | 3.17E-05 | 4.78E-03         |
| TSS1500  | BAT2L2    | 1   | 171454351/171453943                                                                                                                                                                                                                                                              | 2               | cg00526163/cg10143731                                                                                                                                                                                                                                                                                                                              | 0.536697805 | 0.424156072 | 0.264537845 | -0.159618227      | 6.35E-06 | 3.48E-03         |
| TSS1500  | BOLL      | 2   | 198651498/198650880/198650985/198651076/198650603/198650752/198650987/198651576/198653883/198654124/111384048/11384223/111383603/111383288/111383576/111383515/111383624/111383880/111383652                                                                                     | 10              | 803/cg05783139/cg07495363/cg07734961/cg10124201/cg13356896/cg16002818/cg17571923/cg2458245603/cg08827001/cg09148270/cg13767940/cg18515591/cg21881253/cg22879515/cg23211240/cg24041079/cg26561795/cg01422476/cg03467725/cg08734647/cg27105890                                                                                                       | 0.410338441 | 0.486456147 | 0.65089284  | 0.164436693       | 3.04E-04 | 7.65E-03         |
| TSS1500  | BTG4      | 11  | 3/111383288/111383576/111383515/111383624/111383880/111383652                                                                                                                                                                                                                    | 11              | cg01422476/cg03467725/cg08734647/cg27105890                                                                                                                                                                                                                                                                                                        | 0.197607313 | 0.243806879 | 0.403806738 | 0.159999859       | 9.05E-04 | 1.12E-02         |
| TSS1500  | C16orf73  | 16  | 1922425/1922370/1922400/1922577                                                                                                                                                                                                                                                  | 4               | cg0019678/cg03442                                                                                                                                                                                                                                                                                                                                  | 0.315759298 | 0.350905211 | 0.511049441 | 0.16014423        | 5.75E-03 | 3.08E-02         |
| TSS1500  | C17orf102 | 17  | 3290/132/3290/639/32906622/32907388/32907002/32907705/32907636/32906991/32907731/31668141/31668448                                                                                                                                                                               | 9               | cg0019678/cg03442425/cg05890956/cg00282249/cg00370179/cg01040523/cg02478448/cg03871460/cg05089090/cg05120331/cg05137358/cg06260815/cg07962128/cg08215918/cg08296176/cg08676975/cg11023392/cg11513637/cg12417071/cg13435392/cg13711394/cg14089714/cg14499563/cg17215831/cg18348647/cg18948722/cg19866195/cg21587066/cg21754388/cg23831735/cg2415405 | 0.239433865 | 0.29955866  | 0.451134977 | 0.151576317       | 3.50E-04 | 8.00E-03         |
| TSS1500  | C20orf186 | 20  | 37005566/37005074/37004617/37006063/37004721/37005570/37005299/37006127/37005115/37004812/37005557/37004857/37005582/37004715/37005501/37005489/37005107/37004737/37004601/37005035/37004853/37006107/37006116/37004536/37004940/37004747/37004787/37004990/37005289/37005273/37 | 2               | cg00282249/cg00370179/cg01040523/cg02478448/cg03871460/cg05089090/cg05120331/cg05137358/cg06260815/cg07962128/cg08215918/cg08296176/cg08676975/cg11023392/cg11513637/cg12417071/cg13435392/cg13711394/cg14089714/cg14499563/cg17215831/cg18348647/cg18948722/cg19866195/cg21587066/cg21754388/cg23831735/cg2415405                                 | 0.749375975 | 0.709791322 | 0.547756936 | -0.162034386      | 1.17E-03 | 1.27E-02         |
| TSS1500  | CCNA1     | 13  | 005501/37005489/37005107/37004737/37004601/37005035/37004853/37006107/37006116/37004536/37004940/37004747/37004787/37004990/37005289/37005273/37                                                                                                                                 | 34              | cg11023392/cg11513637/cg12417071/cg13435392/cg13711394/cg14089714/cg14499563/cg17215831/cg18348647/cg18948722/cg19866195/cg21587066/cg21754388/cg23831735/cg2415405                                                                                                                                                                                | 0.336303202 | 0.466972428 | 0.62634131  | 0.159368882       | 8.40E-05 | 5.37E-03         |



|         |         |    |                                      |   |                                          |             |             |             |              |          |             |
|---------|---------|----|--------------------------------------|---|------------------------------------------|-------------|-------------|-------------|--------------|----------|-------------|
| TSS1500 | CDH10   | 5  | 24645487/2464514<br>7                | 2 | cg01058368/cg14730<br>815                | 0.408848933 | 0.414785036 | 0.56782963  | 0.153044593  | 4.37E-05 | 4.88E-03    |
| TSS1500 | CDH19   | 18 | 64271503/6427146<br>9                | 2 | cg13853450/cg15728<br>909                | 0.747354578 | 0.626766872 | 0.47666073  | -0.150106143 | 6.34E-06 | 3.48E-03    |
| TSS1500 | CDX2    | 13 | 28544814/2854352<br>0/28544592/28544 | 4 | 963/cg07984133/cg1<br>6201038            | 0.443346519 | 0.280014939 | 0.431752602 | 0.151737663  | 1.08E-02 | 4.67E-02    |
| TSS1500 | CFHR4   | 1  | 196855851                            | 1 | cg11793499<br>cg00903242/cg01295         | 0.78677561  | 0.6862508   | 0.510848623 | -0.175402177 | 5.50E-06 | 3.48E-03    |
| TSS1500 | CHL1    | 3  | 238161/238392/23<br>8318/238048      | 4 | 518/cg04001014/cg1<br>1165881            | 0.319082383 | 0.331529224 | 0.563607323 | 0.232078099  | 1.40E-05 | 4.32E-03    |
| TSS1500 | CHST15  | 10 | 125806958/125807<br>504/125807047    | 3 | cg06034255/cg09595<br>290/ca16449489     | 0.719218533 | 0.531967692 | 0.380170368 | -0.151797323 | 2.01E-04 | 6.73E-03    |
| TSS1500 | CHST5   | 16 | 75569527/7556985<br>2/75569459       | 3 | cg03517083/cg03858<br>460/cg27232078     | 0.60959881  | 0.589231594 | 0.396092173 | -0.193139422 | 3.14E-05 | 4.78E-03    |
| TSS1500 | CLIP4   | 2  | 29337946/2933807<br>7/29337984/29337 | 5 | cg01777397/cg06333<br>058/cg07285673/cg0 | 0.288922638 | 0.419389181 | 0.595234157 | 0.175844976  | 3.57E-04 | 8.05E-03    |
| TSS1500 | CMTM2   | 16 | 988/29338100<br>66613053/6661309     | 3 | 9695033/ca25737323<br>cg01683883/cg08032 | 0.270345705 | 0.400159912 | 0.603544868 | 0.203384956  | 6.82E-04 | 9.94E-03    |
| TSS1500 | CMTM3   | 16 | 6/66612955<br>66638320/6663792       | 5 | 924/ca09849405<br>cg00355909/cg01434     | 0.173318059 | 0.470402982 | 0.643669665 | 0.173266684  | 6.63E-03 | 3.36E-02    |
| TSS1500 | CNRIP1  | 2  | 7/66637919/66638<br>293/66638210     | 2 | cg08174244/cg21216<br>118                | 0.70666885  | 0.545216989 | 0.394946445 | -0.150270543 | 4.68E-05 | 5.07E-03    |
| TSS1500 | DBC1    | 9  | 122132103/122132<br>178/122132052/12 | 6 | cg03625109/cg13685<br>314/cg14445814/cg1 | 0.370155049 | 0.44613189  | 0.623822819 | 0.177690929  | 1.79E-04 | 6.42E-03    |
| TSS1500 | DNAH11  | 7  | 2132379/12213205<br>4/122132261      | 3 | cg00016360/cg06270<br>661/ca09447578     | 0.350061853 | 0.346009398 | 0.53481313  | 0.188803732  | 5.16E-05 | 5.15E-03    |
| TSS1500 | DPP10   | 2  | 115919006/115919<br>366/115918745/11 | 5 | cg03753331/cg04617<br>755/cg12666279/cg1 | 0.291421825 | 0.302930935 | 0.468908183 | 0.165977248  | 3.72E-03 | 2.34E-02    |
| TSS1500 | DPY19L2 | 12 | 5199477/11591900<br>64062724/6406256 | 3 | 6146353/ca21678377<br>cg00845942/cg04455 | 0.21846244  | 0.313160749 | 0.504428995 | 0.191268246  | 9.16E-05 | 0.005371466 |
| TSS1500 | EBF1    | 5  | 4/64063071<br>15852781/158527        | 9 | 164/cg16971885<br>cg00251610/cg01135     | 0.140235014 | 0.223235776 | 0.402209818 | 0.178974042  | 8.25E-04 | 1.07E-02    |
| TSS1500 | EFHA2   | 8  | 707/158527702/15<br>8527982/15852746 | 3 | 5774756/cg07607126<br>/cg15963563/cg1612 | 0.179144757 | 0.265004541 | 0.489821532 | 0.224816992  | 3.23E-04 | 7.85E-03    |
| TSS1500 | EID3    | 12 | 27573/158527463/<br>158527459        | 3 | 6280/cg16317459/cg<br>cg03919781/cg21653 | 0.247947366 | 0.421289865 | 0.607087922 | 0.185798057  | 1.93E-03 | 1.61E-02    |
| TSS1500 | EOMES   | 3  | 16884225/1688419<br>7/16884364       | 6 | 826/ca23218760<br>cg01857475/cg09884     | 0.27810847  | 0.367711204 | 0.52080839  | 0.153097186  | 4.66E-04 | 8.63E-03    |
| TSS1500 | EPHA7   | 6  | 104697193/104697<br>220/104697224    | 5 | cg01714811/cg02694<br>810/cg06014401/cg1 | 0.186532958 | 0.25859245  | 0.4403509   | 0.18175845   | 5.41E-03 | 2.97E-02    |
|         |         |    | 27764473/2776466<br>0/27765232/27765 |   | 5540820/cg16971668<br>/ca22383888        |             |             |             |              |          |             |
|         |         |    | 283/27764810/277<br>64816            |   | cg02168857/cg06740<br>629/cg08001895/cg2 |             |             |             |              |          |             |
|         |         |    | 94129611/9412962<br>636/94129697     |   | 1552709/ca22263131                       |             |             |             |              |          |             |

|         |          |    |                                                                              |    |                                                                                                 |             |             |             |              |          |          |
|---------|----------|----|------------------------------------------------------------------------------|----|-------------------------------------------------------------------------------------------------|-------------|-------------|-------------|--------------|----------|----------|
| TSS1500 | EVC      | 4  | 5712581/5712676/<br>5712592                                                  | 3  | cg03881544/cg15305<br>511/cg26875219<br>cg03278643/cg03881                                      | 0.215831775 | 0.277033162 | 0.449048542 | 0.17201538   | 3.14E-03 | 2.12E-02 |
| TSS1500 | EVC2     | 4  | 5710767/5712581/<br>5711301/5712676/<br>5710761/5712592                      | 6  | 544/cg09558315/cg1<br>5305511/cg17242664<br>/cg26875219<br>cg05698098/cg06781                   | 0.215831775 | 0.277033162 | 0.449048542 | 0.17201538   | 3.14E-03 | 2.12E-02 |
| TSS1500 | FADS2    | 11 | 61595494/6159499<br>7/61594965/61595<br>485                                  | 4  | 209/cg21709803/cg2<br>3760165<br>cg05965392/cg17162                                             | 0.159061191 | 0.182416376 | 0.386897281 | 0.204480905  | 2.97E-04 | 7.62E-03 |
| TSS1500 | FAM150A  | 8  | 53478624/5347845<br>4/53478706<br>108520039/108520                           | 3  | 024/cg26021627<br>cg05141482/cg055955                                                           | 0.23671131  | 0.229776212 | 0.400791592 | 0.17101538   | 2.64E-03 | 1.94E-02 |
| TSS1500 | FAM155A  | 13 | 481/108519752/10<br>8520391/10852018<br>9/108520252/1085                     | 10 | 988/cg06446668/cg0<br>6833978/cg07034928<br>/cg13582072/cg1858                                  | 0.25719381  | 0.285549024 | 0.451570455 | 0.166021431  | 1.29E-03 | 1.33E-02 |
| TSS1500 | FBN2     | 5  | 20827/108520945/<br>108520566/108519<br>127874478/127874                     | 7  | 8768/cg22302985/cg<br>24567434/cg2508565<br>cg01939274/cg05666                                  | 0.233092783 | 0.267891083 | 0.458669824 | 0.190778741  | 1.01E-03 | 1.19E-02 |
| TSS1500 | FGF5     | 4  | 587/127873980/12<br>7874463/12787516<br>3/127874466/1278<br>81186795/8118712 | 5  | 497/cg06993118/cg1<br>1965976/cg20708842<br>/cg25532099/cg2722<br>cg05894124/cg10218            | 0.166089672 | 0.211075347 | 0.431028501 | 0.219953154  | 7.39E-06 | 3.51E-03 |
| TSS1500 | FLJ33360 | 5  | 5/81187011/81187<br>198/81186901                                             | 4  | 799/cg12087412/cg1<br>8638496/cg21477508<br>cg02202411/cg02328                                  | 0.7507706   | 0.694758528 | 0.477771682 | -0.216986846 | 1.11E-06 | 3.48E-03 |
| TSS1500 | FLRT2    | 14 | 6338418/6338017/<br>6338529/6338794<br>85996202/8599572                      | 7  | 035/cg17491560/cg2<br>2778952<br>cg02305242/cg10406                                             | 0.218268422 | 0.301255612 | 0.465920785 | 0.164665173  | 3.39E-04 | 7.95E-03 |
| TSS1500 | FUT9     | 6  | 6/85996260/85995<br>859/85996274/859<br>95655/85996101                       | 3  | 690/cg12080751/cg1<br>2155356/cg18845692<br>/cg23934295/cg2665<br>cg01837719/cg22782            | 0.38322732  | 0.452863714 | 0.671393257 | 0.218529543  | 2.09E-05 | 4.47E-03 |
| TSS1500 | FZD10    | 12 | 6/96462814<br>130645645/130646<br>461/130646022/13<br>0646129/13064625       | 8  | 271/cg23997263<br>cg02214745/cg02291<br>403/cg09048530/cg1<br>7537177/cg18209212                | 0.29197381  | 0.332261222 | 0.541514312 | 0.209253089  | 3.31E-05 | 4.78E-03 |
| TSS1500 | GALNT13  | 2  | 6/130646370/1306<br>46497/130645566<br>154728210/154727                      | 7  | /cg20058043/cg2138<br>6611/cg22813950<br>cg07547000/cg08042                                     | 0.398731636 | 0.398701913 | 0.550407905 | 0.151705991  | 5.39E-05 | 5.20E-03 |
| TSS1500 | GALNTL6  | 4  | 485/154727907/15<br>4728133/15472806<br>2/154727925/1547<br>172734276/172734 | 6  | 220/cg12398124/cg1<br>2424785/cg14635767<br>/cg21998983/cg2698<br>cg03304610/cg05295            | 0.318865286 | 0.409996313 | 0.609992463 | 0.19999615   | 5.33E-05 | 5.20E-03 |
| TSS1500 | GFRA2    | 8  | 347/172734031/17<br>2733566/17273376<br>0/172734266<br>21647596/2164666      | 4  | 9892710/cg17896776<br>/cg26814276<br>cg03330485/cg03453                                         | 0.238076203 | 0.245361925 | 0.397112514 | 0.15175059   | 6.59E-04 | 9.84E-03 |
| TSS1500 | GNAO1    | 16 | 2/21647026/21646<br>704<br>56224782/5622450<br>4/56224901/56224              | 5  | 638/cg05021638/cg1<br>4072903<br>cg00866976/cg04156<br>464/cg06728579/cg0<br>8613597/cg10273340 | 0.121886658 | 0.203293909 | 0.404969255 | 0.201675346  | 4.78E-04 | 8.72E-03 |

|         |           |    |                                                                                                                                                                |    |                                                                                                                                                                                                    |             |             |             |              |          |          |
|---------|-----------|----|----------------------------------------------------------------------------------------------------------------------------------------------------------------|----|----------------------------------------------------------------------------------------------------------------------------------------------------------------------------------------------------|-------------|-------------|-------------|--------------|----------|----------|
| TSS1500 | GPR27     | 3  | 71802533/7180260<br>8/71802420/71802                                                                                                                           | 4  | cg03604840/cg04408<br>595/cg22631938/cg2                                                                                                                                                           | 0.20313981  | 0.221876609 | 0.396107026 | 0.174230416  | 5.03E-05 | 5.12E-03 |
| TSS1500 | GRIN2A    | 16 | 594<br>102776984/10277<br>5/10276984/10277<br>317/10276383/102<br>76674/10277254/1                                                                             | 11 | 2823146<br>cg000302299/cg00020<br>829/cg00518386/cg0<br>1722994/cg06758670<br>/cg07642043/cg0862                                                                                                   | 0.187488334 | 0.294552973 | 0.470548664 | 0.17599569   | 1.80E-04 | 6.42E-03 |
| TSS1500 | GRWD1     | 19 | 0276580/10276799<br>/10276600/102770<br>48947560/4894763                                                                                                       | 5  | 1611/cg09239744/cg<br>16368442/cg2476497<br>cg04988514/cg14594                                                                                                                                     | 0.337209907 | 0.448778694 | 0.62741754  | 0.178638846  | 1.99E-04 | 6.68E-03 |
| TSS1500 | HEPN1     | 11 | 1/48947572/48947                                                                                                                                               | 5  | 362/cg16875863/cg2                                                                                                                                                                                 | 0.337209907 | 0.448778694 | 0.62741754  | 0.178638846  | 1.99E-04 | 6.68E-03 |
| TSS1500 | HKDC1     | 10 | 578/48948005<br>124788414                                                                                                                                      | 1  | 2242216/ca26362197<br>cg23530543                                                                                                                                                                   | 0.777910525 | 0.658016239 | 0.490776441 | -0.167239798 | 4.36E-04 | 8.50E-03 |
| TSS1500 | HMHB1     | 5  | 70979827/7097981<br>1/70979777                                                                                                                                 | 3  | cg05532178/cg11639<br>651/ca23341612                                                                                                                                                               | 0.811678557 | 0.715256174 | 0.537345724 | -0.17791045  | 8.04E-04 | 1.06E-02 |
| TSS1500 | HTR1A     | 5  | 143190384/143191<br>194/143191226<br>63257885/6325781                                                                                                          | 3  | cg12672779/cg14461<br>752/cg15823954<br>cg07839533/cg08259                                                                                                                                         | 0.872872    | 0.77037915  | 0.612053091 | -0.158326059 | 1.05E-04 | 5.67E-03 |
| TSS1500 | IGLON5    | 19 | 3/63257847/63257<br>867/63257941/632                                                                                                                           | 7  | 925/cg09698471/cg1<br>1615755/cg13666507                                                                                                                                                           | 0.338136579 | 0.413936406 | 0.581700744 | 0.167764338  | 1.73E-05 | 4.46E-03 |
| TSS1500 | IL17A     | 6  | 57873/63257753<br>51814765/5181478                                                                                                                             | 2  | /ca15092168/ca1628<br>cg22489583/cg25728                                                                                                                                                           | 0.066697245 | 0.071265356 | 0.282444154 | 0.211178798  | 6.94E-04 | 1.01E-02 |
| TSS1500 | INA       | 10 | 2<br>52050133/5205059                                                                                                                                          | 2  | 174<br>cg09582880/cg11924                                                                                                                                                                          | 0.67080109  | 0.520380394 | 0.348856723 | -0.171523672 | 2.31E-04 | 7.11E-03 |
| TSS1500 | IRF4      | 6  | 7<br>105036611/105036                                                                                                                                          | 3  | cg18673954/cg21384<br>402/ca23642747                                                                                                                                                               | 0.276782288 | 0.405315217 | 0.614194856 | 0.208879639  | 1.41E-03 | 1.36E-02 |
| TSS1500 | IRX1      | 5  | 701/105036645<br>391189/391208/39<br>1114/391441                                                                                                               | 4  | cg01108118/cg10379<br>890/cg25140370/cg2                                                                                                                                                           | 0.159531561 | 0.300096832 | 0.450682769 | 0.150585938  | 3.00E-03 | 2.07E-02 |
| TSS1500 | IRX4      | 5  | 3594679/3595728/<br>3595907/3595106                                                                                                                            | 4  | 6433102<br>cg01790920/cg05534<br>710/cg06689918/cg0                                                                                                                                                | 0.257273828 | 0.338832611 | 0.4921754   | 0.153342789  | 8.77E-05 | 5.37E-03 |
| TSS1500 | KCNA1     | 12 | 1883413/1883514/<br>1884212/1884365/<br>1883940/1883954/<br>1883214<br>5018338/5018513/<br>5018715/5018815/<br>5018229/5018805/<br>5018798<br>47797953/4779867 | 7  | cg00243313/cg00264<br>591/cg05941108/cg1<br>4823763/cg18009496<br>/ca23121993/cg2487<br>cg00838874/cg04891<br>086/cg06652199/cg1<br>1388325/cg15930596<br>/ca19651132/cg2039<br>cg01826863/cg04934 | 0.254729214 | 0.364092219 | 0.533084286 | 0.168992067  | 5.26E-03 | 2.92E-02 |
| TSS1500 | KCNK12    | 2  | 9/47798477/47797                                                                                                                                               | 5  | 807/cg04981611/cg1                                                                                                                                                                                 | 0.183212817 | 0.279456873 | 0.503915957 | 0.224459084  | 4.54E-06 | 3.48E-03 |
| TSS1500 | KHDRBS2   | 6  | 963/47798396<br>62996702/6299669<br>7/62996627/62996                                                                                                           | 4  | 3913015/ca27320127<br>cg00578220/cg02217<br>159/cg04398581/cg2                                                                                                                                     | 0.212554239 | 0.312072944 | 0.510115303 | 0.198042359  | 1.92E-03 | 1.61E-02 |
| TSS1500 | KLRG1     | 12 | 664<br>9141740/9141775                                                                                                                                         | 2  | 3926793<br>cg00443307/cg26806<br>779                                                                                                                                                               | 0.721784318 | 0.576945203 | 0.381956675 | -0.194988528 | 1.97E-05 | 4.47E-03 |
| TSS1500 | KRTAP13-4 | 21 | 31802169<br>7118077/7118122/<br>7118092                                                                                                                        | 1  | cg24082983<br>cg03159124/cg14950<br>072/ca19909349                                                                                                                                                 | 0.558472755 | 0.452200783 | 0.301083264 | -0.15111752  | 9.73E-05 | 5.58E-03 |
| TSS1500 | LAMA1     | 18 |                                                                                                                                                                | 3  |                                                                                                                                                                                                    | 0.32049846  | 0.412715654 | 0.601877356 | 0.189161702  | 5.32E-04 | 8.96E-03 |

|         |              |    |                                                                         |    |                                                                                                           |             |             |             |              |          |          |
|---------|--------------|----|-------------------------------------------------------------------------|----|-----------------------------------------------------------------------------------------------------------|-------------|-------------|-------------|--------------|----------|----------|
| TSS1500 | LIPH         | 3  | 185271312/185271385/185271383                                           | 3  | cg01390445/cg0451382/cg16255307                                                                           | 0.861541818 | 0.827888689 | 0.665705432 | -0.162183257 | 6.87E-04 | 9.97E-03 |
| TSS1500 | LOC100133469 | 14 | 106937310/106938234/106937869                                           | 3  | cg13275724/cg16023283/cg20900869                                                                          | 0.723368845 | 0.641521967 | 0.490657027 | -0.150864939 | 5.27E-06 | 3.48E-03 |
| TSS1500 | LOC100190940 | 12 | 130527106/130527104/130527212                                           | 3  | cg02681173/cg10233825/cg15848986                                                                          | 0.33267563  | 0.438905169 | 0.628995864 | 0.190090694  | 4.44E-04 | 8.50E-03 |
| TSS1500 | LOC157627    | 8  | 9761905/9761454/9761141/9761171/9762300/9762100/9762057                 | 7  | cg06292304/cg12616174/cg14278808/cg15248835/cg15537082                                                    | 0.21117185  | 0.309867936 | 0.474917205 | 0.165049269  | 7.98E-04 | 1.06E-02 |
| TSS1500 | LRFN5        | 14 | 42075865/42075554/42075760/42075975/42075810/42075406/42075664/42075492 | 8  | /cg18246262/cg2418cg02150867/cgU2454806/cg04171065/cg05943996/cg10160975/cg10327400/cg21526847/cg23955431 | 0.219774383 | 0.317605529 | 0.485380155 | 0.167774626  | 6.16E-04 | 9.59E-03 |
| TSS1500 | LVRN         | 5  | 115297723/115297690/115297853/115297488                                 | 4  | cg06644553/cg10199250/cg15489294/cg23915769                                                               | 0.390596855 | 0.434036431 | 0.606987731 | 0.1729513    | 9.38E-06 | 3.60E-03 |
| TSS1500 | MIR124-3     | 20 | 61809035/61808888/61809348/6180857                                      | 5  | cg02065637/cg02650317/cg04927004/cg08737296/cg15699267                                                    | 0.187117414 | 0.288151058 | 0.443465535 | 0.155314477  | 1.19E-03 | 1.28E-02 |
| TSS1500 | MIR216B      | 2  | 56229060/111383668/111382915/111383603/11383288/11138357                | 1  | cg02071553cg01192900/cg03242880/cg13767940/cg18515591/cg21881253                                          | 0.738162795 | 0.683389278 | 0.5301385   | -0.153250778 | 8.13E-04 | 1.06E-02 |
| TSS1500 | MIR34C       | 11 | 6/111383083/111383515/111383624/111382880/11138389340750/8934006        | 10 | cg01673994/cg05033271/cg07609388/cg08397978/cg12818557                                                    | 0.304172077 | 0.372950868 | 0.546756216 | 0.173805348  | 6.29E-04 | 9.68E-03 |
| TSS1500 | MMP16        | 8  | 9/89341103/89340205/89340139/89340331/89340480                          | 7  | cg01673994/cg05033271/cg07609388/cg08397978/cg12818557                                                    | 0.327120406 | 0.40430779  | 0.575818649 | 0.171510859  | 4.89E-04 | 8.78E-03 |
| TSS1500 | MUSK         | 9  | 113430005/52536175/5253643                                              | 1  | /cg14644752/cg2445cg01737465                                                                              | 0.782561555 | 0.74197165  | 0.588620055 | -0.153351595 | 6.63E-04 | 9.85E-03 |
| TSS1500 | NID2         | 14 | 6/52536147/52536721/52536893                                            | 5  | cg04701034/cg16695483/cg22881914/cg25685519/cg26923084                                                    | 0.528406575 | 0.523222246 | 0.673418497 | 0.150196251  | 1.47E-04 | 6.10E-03 |
| TSS1500 | NMBR         | 6  | 142410216/142410235/142410221                                           | 3  | cg13202845/cg18425786/cg21460020                                                                          | 0.342598663 | 0.382262107 | 0.546260842 | 0.163998735  | 1.42E-04 | 5.98E-03 |
| TSS1500 | NOVA1        | 14 | 27067707/27067895/27068354/27068093/27067638/27067372/27068135          | 7  | cg02014003/cg07543626/cg11146971/cg16791424/cg18468511                                                    | 0.274856558 | 0.292430327 | 0.457206281 | 0.164775954  | 4.00E-04 | 8.37E-03 |
| TSS1500 | NPAS4        | 11 | 66188019/66188203/66187533                                              | 3  | /cg20478129/cg2350cg02055483/cg09835239/cg24435401                                                        | 0.218762555 | 0.328106943 | 0.536197375 | 0.208090432  | 9.13E-05 | 5.37E-03 |
| TSS1500 | NPBWR1       | 8  | 53852101/53851613/53852184/53852030/53851707/53851156                   | 6  | cg02115041/cg07629017/cg15531403/cg16330450/cg24857620                                                    | 0.253709521 | 0.413337796 | 0.606035915 | 0.192698119  | 3.59E-04 | 8.05E-03 |
| TSS1500 | NPTX2        | 7  | 98245830/98246006/98245716/98246001                                     | 4  | /cg26205771cg00548268/cg08315202/cg09596818/cg13314145                                                    | 0.416650292 | 0.435665248 | 0.592178547 | 0.156513299  | 2.92E-03 | 2.04E-02 |

|         |          |    |                                                                        |   |                                                        |             |             |             |              |             |             |
|---------|----------|----|------------------------------------------------------------------------|---|--------------------------------------------------------|-------------|-------------|-------------|--------------|-------------|-------------|
| TSS1500 | NR2E1    | 6  | 108486517/108486387/108486450/108486773/10848612                       | 7 | cg03950614/cg03958979/cg08640634/cg12463600/cg18710462 | 0.325656174 | 0.404558707 | 0.563828238 | 0.159269531  | 6.07E-05    | 5.29E-03    |
| TSS1500 | NTRK3    | 15 | 3/1084865837/108488799973/88800510/88800567/88799999/88801004/88800624 | 6 | cg04627496/cg04920689/cg05901579/cg07252731/cg11108676 | 0.170978061 | 0.318451373 | 0.507354069 | 0.188902696  | 1.19E-03    | 1.28E-02    |
| TSS1500 | ONECUT1  | 15 | 53083238/53082477/53083587/53083532/53082902/53083518/53083135         | 7 | cg01196531/cg02061705/cg06657050/cg13877670/cg15628498 | 0.294836457 | 0.431906515 | 0.589879428 | 0.157972914  | 7.79E-05    | 5.34E-03    |
| TSS1500 | OR10A7   | 12 | 55613318                                                               | 1 | cg26442740                                             | 0.702508535 | 0.621660633 | 0.458238027 | -0.163422606 | 7.68E-04    | 1.05E-02    |
| TSS1500 | OR10J1   | 1  | 159409207/1594079                                                      | 2 | cg15700197/cg23689219                                  | 0.660124183 | 0.513700247 | 0.359709559 | -0.153990688 | 4.97E-05    | 5.10E-03    |
| TSS1500 | OR10K2   | 1  | 158391119                                                              | 1 | cg01733284                                             | 0.809446245 | 0.676295411 | 0.484221795 | -0.192073616 | 5.24E-04    | 8.91E-03    |
| TSS1500 | OR2L8    | 1  | 248111283/248110661                                                    | 2 | cg10580513/cg18857759                                  | 0.613446275 | 0.493381778 | 0.319458732 | -0.173923046 | 1.95E-06    | 3.48E-03    |
| TSS1500 | OR56A1   | 11 | 6049729                                                                | 1 | cg18512262                                             | 0.57736578  | 0.416929178 | 0.255862718 | -0.16106646  | 4.72E-05    | 5.07E-03    |
| TSS1500 | OR8D2    | 11 | 124191389/124190997                                                    | 2 | cg04629433/cg15952370                                  | 0.544132685 | 0.465419733 | 0.256743609 | -0.208676124 | 4.75E-06    | 3.48E-03    |
| TSS1500 | OTOP1    | 4  | 4229061/4229810/4229883                                                | 3 | cg03160466/cg06658468/cg20849299                       | 0.347108885 | 0.414799181 | 0.581701818 | 0.166902638  | 7.78E-04    | 1.05E-02    |
| TSS1500 | P2RX2    | 12 | 133195094/133193959/133195196/133195061                                | 4 | cg00058329/cg02315111/cg22368664/cg26620450            | 0.209241909 | 0.234090244 | 0.44044457  | 0.206354326  | 1.25E-04    | 5.92E-03    |
| TSS1500 | PAX2     | 10 | 102504226/102504893/102504649/102504236/102505226                      | 8 | cg01275523/cg05044739/cg09222673/cg14096353/cg15416233 | 0.154330824 | 0.217752711 | 0.376641182 | 0.158888471  | 0.000150033 | 0.006149797 |
| TSS1500 | PCDH10   | 4  | 6/102504022/102504297/102504039                                        | 8 | cg00945238/cg02043159/cg02114924/cg04035209/cg05401965 | 0.321056674 | 0.419374559 | 0.61695395  | 0.197579391  | 4.56E-05    | 5.03E-03    |
| TSS1500 | PCDH17   | 13 | 9/134069388/134069593/134069236                                        | 5 | cg07430472/cg12606396/cg13806135/cg15112032/cg25891355 | 0.293968366 | 0.406563267 | 0.570533475 | 0.163970208  | 8.61E-05    | 5.37E-03    |
| TSS1500 | PCDHGB4  | 5  | 58205001/5820437365/58205111                                           | 4 | cg02741229/cg22041640/cg23347399/cg20767200            | 0.366960643 | 0.434457358 | 0.585020359 | 0.150563001  | 4.73E-04    | 8.66E-03    |
| TSS1500 | PCDHGB5  | 5  | 140777473/140777344                                                    | 2 | cg11686427/cg25426815                                  | 0.374205635 | 0.391285904 | 0.576918885 | 0.185632981  | 2.13E-05    | 4.47E-03    |
| TSS1500 | PCDHGC4  | 5  | 140864276/14086474/140864020                                           | 3 | cg06428620/cg12648074/cg26890354                       | 0.26878578  | 0.380269639 | 0.540655073 | 0.160385434  | 4.46E-04    | 8.51E-03    |
| TSS1500 | PHOX2A   | 11 | 71956145/71955547/71955439/7195599                                     | 4 | cg01527777/cg08876932/cg16922279/cg24530250            | 0.301572288 | 0.360743145 | 0.521985263 | 0.161242118  | 2.41E-03    | 1.84E-02    |
| TSS1500 | POU4F2   | 4  | 147559648/147559579/147559423/147558544                                | 4 | cg12935979/cg13262687/cg19597382/cg25970230            | 0.33730075  | 0.459647814 | 0.634065168 | 0.174417354  | 2.75E-04    | 7.48E-03    |
| TSS1500 | PPP1R2P1 | 6  | 32843055/32844032                                                      | 2 | cg13617603/cg22744098                                  | 0.57436797  | 0.467743344 | 0.305982527 | -0.161760817 | 9.48E-06    | 3.60E-03    |

|         |            |    |                                                                                                     |                                                                                                                               |             |             |             |              |          |          |
|---------|------------|----|-----------------------------------------------------------------------------------------------------|-------------------------------------------------------------------------------------------------------------------------------|-------------|-------------|-------------|--------------|----------|----------|
| TSS1500 | PTPRT      | 20 | 41819125/4181878<br>8/41818770/41818 4<br>905<br>163834924/163834<br>452/163834872/16               | cg04541293/cg07167<br>168/cg17859110/cg2<br>1672843<br>cg00852/68/cg0/618                                                     | 0.184511835 | 0.266124741 | 0.432638811 | 0.166514071  | 1.22E-04 | 5.88E-03 |
| TSS1500 | QKI        | 6  | 3834903/16383525 8<br>1/163835395/1638<br>350960/16783593Z,<br>5/85094904/85096<br>835/85094923/850 | 175/cg08169901/cg0<br>/cg20930060/cg2395<br>4057/cg25157874<br>cg003407/67cg00200<br>009/cg01134282/cg0<br>1538821/cg06955749 | 0.087814187 | 0.144904504 | 0.300689284 | 0.15578478   | 4.26E-03 | 2.55E-02 |
| TSS1500 | RALYL      | 8  | 94842/85094742/8 12<br>5094437/85096015<br>/85096868/850956<br>51/85096607                          | /cg08327106/cg0975<br>7712/cg11089595/cg<br>22403811/cg2345855<br>8/cg2277058/cg266                                           | 0.27086144  | 0.310675616 | 0.502710953 | 0.192035337  | 1.03E-04 | 5.66E-03 |
| TSS1500 | RGS21      | 1  | 192285333 1<br>72398920/7239955                                                                     | cg00158654<br>cg14702655/cg15457                                                                                              | 0.79529358  | 0.666336306 | 0.512647895 | -0.15368841  | 2.16E-04 | 6.89E-03 |
| TSS1500 | RGS6       | 14 | 3/72398856/72398 4<br>839                                                                           | 745/cg16396954/cg2<br>3576118                                                                                                 | 0.132310638 | 0.143585694 | 0.298340158 | 0.154754464  | 2.54E-04 | 7.36E-03 |
| TSS1500 | RPL31P11   | 1  | 161655895 1<br>237205295/237205                                                                     | cg22445346<br>cg03422911/cg07790                                                                                              | 0.748590945 | 0.614487478 | 0.448657486 | -0.165829991 | 7.08E-05 | 5.34E-03 |
| TSS1500 | RYR2       | 1  | 174/237205409/23 4<br>7205098                                                                       | 615/cg18375860/cg1<br>9764418                                                                                                 | 0.452385778 | 0.41005682  | 0.648201086 | 0.238144267  | 2.93E-06 | 3.48E-03 |
| TSS1500 | SCARF2     | 22 | 20792476/2079253 2<br>5<br>12994049/1299501                                                         | cg08748948/cg14785<br>479<br>cg02748479/cg09229                                                                               | 0.279022718 | 0.351433703 | 0.511275693 | 0.15984199   | 5.83E-04 | 9.39E-03 |
| TSS1500 | SHISA9     | 16 | 1/12995078/12994 4<br>998                                                                           | 683/cg21432375/cg2<br>6752526                                                                                                 | 0.225686592 | 0.278124102 | 0.430683681 | 0.152559579  | 1.42E-03 | 1.37E-02 |
| TSS1500 | SIRPG      | 20 | 1639325/1639816/ 3<br>1639250                                                                       | cg11061975/cg13408<br>605/cg23295754                                                                                          | 0.702641013 | 0.50884555  | 0.339862545 | -0.168983005 | 5.63E-05 | 5.22E-03 |
| TSS1500 | SLC10A6    | 4  | 87770782/8777074 2<br>4<br>5081/104/5081/21                                                         | cg13119182/cg15881<br>238<br>cg0599/350/cg06108                                                                               | 0.828922718 | 0.733751794 | 0.566891625 | -0.166860169 | 1.46E-04 | 6.09E-03 |
| TSS1500 | SLC18A3    | 10 | 3/50817804/50816 9<br>963/50816917/508<br>17306/50817810/5                                          | 782/cg08996579/cg1<br>2052765/cg17284779<br>/cg18592174/cg2398                                                                | 0.298896711 | 0.373556264 | 0.526404253 | 0.152847989  | 5.10E-04 | 8.85E-03 |
| TSS1500 | SLC27A6    | 5  | 128300967/128300 3<br>696/128300708<br>88324193/8832459                                             | 7444/cg26813646/cg<br>cg00076307/cg20103<br>758/cg20417527<br>cg08492619/cg09083                                              | 0.242221315 | 0.30317555  | 0.492429005 | 0.189253455  | 6.27E-04 | 9.68E-03 |
| TSS1500 | SLITRK5    | 13 | 7/88324432/88324 10<br>570/88323396/883<br>23992/88323940/8<br>8324169/88323607                     | 627/cg15461335/cg1<br>5778745/cg16328172<br>/cg19391029/cg2119<br>4448/cg25081106/cg                                          | 0.199629367 | 0.201339328 | 0.355461468 | 0.15412214   | 1.43E-04 | 6.03E-03 |
| TSS1500 | SNORD113-4 | 14 | 101402192/101402 2<br>494<br>50824244/5082354                                                       | 2611/cg710/cg2745194<br>cg03629141/cg05218<br>696<br>cg062481/9/cg0/139                                                       | 0.690925805 | 0.640672289 | 0.459901064 | -0.180771225 | 1.81E-04 | 6.43E-03 |
| TSS1500 | SNTG1      | 8  | 1/50823173/50823 8<br>468/50823377/508<br>23252/50823124/5<br>8821358                               | 205/cg07854547/cg0<br>8896053/cg08954417<br>/cg22095914/cg2508<br>6136/cg26461605                                             | 0.249223634 | 0.339200155 | 0.493951034 | 0.15475088   | 4.48E-04 | 8.51E-03 |

|         |         |    |                                                                   |    |                                                                                                            |             |             |             |              |             |             |
|---------|---------|----|-------------------------------------------------------------------|----|------------------------------------------------------------------------------------------------------------|-------------|-------------|-------------|--------------|-------------|-------------|
| TSS1500 | SORCS3  | 10 | 106400259/106400<br>114/106399513/10<br>6400565/10639995          | 7  | cg02320740/cg02392<br>179/cg07126167/cg0<br>8768569/cg09551147                                             | 0.259994593 | 0.362678822 | 0.524607345 | 0.161928523  | 2.31E-04    | 7.09E-03    |
| TSS1500 | SPAG11B | 8  | 7/106400454/1063<br>7311130<br>44338099/4433791                   | 1  | /cg14752336/cg2379<br>cg14600420<br>cg01059449/cg15049                                                     | 0.61582796  | 0.442693267 | 0.288175909 | -0.154517358 | 2.65E-04    | 7.43E-03    |
| TSS1500 | ST8SIA5 | 18 | 0/44337664/44337<br>922/44338147/443<br>37853<br>114697032/114696 | 6  | 968/cg15966229/cg2<br>3129478/cg23302884<br>/cg26155939<br>cg00704109/cg03314                              | 0.285734185 | 0.334694973 | 0.535361973 | 0.200667     | 4.19E-04    | 8.49E-03    |
| TSS1500 | SYT6    | 1  | 698/114697523/11<br>4696822/11469735<br>2/114697113/1146          | 11 | 545/cg06620092/cg0<br>8883066/cg12097117<br>/cg12804010/cg1597<br>6388/cg19874857/cg<br>19901801/cg2264671 | 0.241304647 | 0.277428165 | 0.427951805 | 0.15052364   | 0.000663443 | 0.009850114 |
| TSS1500 | SYT9    | 11 | 96946/114697095/<br>114697032/114696<br>708/444607707             | 4  | cg01806928/cg08913<br>010/cg14243481/cg2<br>6945996<br>cg03549162/cg12685                                  | 0.281621628 | 0.351672528 | 0.545256369 | 0.193583841  | 1.56E-03    | 1.44E-02    |
| TSS1500 | TEKT1   | 17 | 6735316/6735539/<br>6735272<br>170735186/170735                   | 3  | 753/cg15615160<br>cg05787556/cg18336                                                                       | 0.201185964 | 0.266171536 | 0.444536309 | 0.178364773  | 4.90E-04    | 8.78E-03    |
| TSS1500 | TLX3    | 5  | 264/170736021/17<br>0734856/17073575                              | 6  | 674/cg18468394/cg2<br>2160448/cg24881420                                                                   | 0.386740033 | 0.468786828 | 0.621915544 | 0.153128717  | 1.68E-04    | 6.40E-03    |
| TSS1500 | TRDN    | 6  | 4/170735347<br>123959184<br>72665510/7266626                      | 1  | /cg26517171<br>cg14462830<br>cg01817029/cg02511                                                            | 0.72351412  | 0.616815044 | 0.432497877 | -0.184317167 | 0.000164978 | 0.006393705 |
| TSS1500 | TRHDE   | 12 | 4/72665880/72666<br>281/72665376/726                              | 7  | 156/cg04775889/cg0<br>6622999/cg17771605                                                                   | 0.235902135 | 0.300701726 | 0.453103565 | 0.152401839  | 2.05E-03    | 1.68E-02    |
| TSS1500 | USP44   | 12 | 65282/72665771<br>95942964/9594311                                | 5  | /cg18440199/cg2314<br>cg07783282/cg09883                                                                   | 0.196333114 | 0.242103689 | 0.431633    | 0.189529311  | 1.86E-03    | 1.59E-02    |
| TSS1500 | VASH1   | 14 | 4/95942907/95945<br>767/95942847<br>77227574/7722786              | 5  | 286/cg13879483/cg1<br>6192751/cg17368254<br>cg02735446/cg07559                                             | 0.176556459 | 0.181655931 | 0.337989367 | 0.156333436  | 2.49E-03    | 1.88E-02    |
| TSS1500 | VEGFC   | 4  | 0/77227570/77227<br>545/77227645<br>177714373/177714              | 4  | 696/cg12825804/cg1<br>4124894/cg23948080<br>cg01590753/cg06679                                             | 0.384570977 | 0.409092681 | 0.559936502 | 0.150843821  | 5.99E-04    | 9.50E-03    |
| TSS1500 | WBSCR17 | 7  | 350/177714456/17<br>7715040<br>70596377/7059709                   | 6  | 347/cg17177660/cg2<br>4194285<br>cg01159623/cg01366<br>419/cg02300154/cg0<br>3044249/cg03893271            | 0.394991448 | 0.47322018  | 0.639233247 | 0.166013067  | 2.19E-04    | 6.95E-03    |
|         |         |    | 1/70597058/70597<br>065/70597458/705<br>96308                     |    | /cg10239388                                                                                                |             |             |             |              |             |             |

|         |          |    |                                                                                                                                                                                                                                                                                    |                                                                                                                                                                                                                                                                                            |             |             |             |              |          |          |
|---------|----------|----|------------------------------------------------------------------------------------------------------------------------------------------------------------------------------------------------------------------------------------------------------------------------------------|--------------------------------------------------------------------------------------------------------------------------------------------------------------------------------------------------------------------------------------------------------------------------------------------|-------------|-------------|-------------|--------------|----------|----------|
| TSS1500 | WDR8     | 1  | 3567870/3567303/<br>3568004/3566992/<br>3567646/3567719/<br>3568154/3566963/<br>3567852/3568124/<br>3567412/3567119/ 22<br>3567214/3567930/<br>3567408/3567109/<br>3567163/3566950/<br>3567986/3567732/<br>3567738/3567550<br>32457878/3245772 3<br>7/32457386<br>56013556/5601380 | cg01434649/cg04021<br>697/cg04391111/cg0<br>4865841/cg07382920<br>/cg10038618/cg1014<br>3426/cg11256802/cg<br>12475507/cg1478192<br>2/cg16823083/cg180<br>21902/cg19135761/c<br>g20611911/cg210000<br>72/cg21012455/cg22<br>614891/cg22822803/<br>cg24073122/cg24678<br>cg12600018/cg22975 | 0.364920319 | 0.467848881 | 0.620655629 | 0.152806748  | 8.67E-05 | 5.37E-03 |
| TSS1500 | WT1      | 11 | 7/32457386<br>56013556/5601380                                                                                                                                                                                                                                                     | cg12600018/cg22975<br>913/cg26232818<br>cg08417620/cg09388                                                                                                                                                                                                                                 | 0.182944365 | 0.213337707 | 0.375527668 | 0.162189961  | 1.05E-02 | 4.61E-02 |
| TSS1500 | XKR4     | 8  | 0/56014406/56014 4<br>433<br>44654206                                                                                                                                                                                                                                              | 605/cg09524907/cg2<br>0948997<br>cg03815116                                                                                                                                                                                                                                                | 0.293191333 | 0.29172405  | 0.443875378 | 0.152151329  | 1.30E-03 | 1.33E-02 |
| TSS1500 | YIPF7    | 4  | 44654206                                                                                                                                                                                                                                                                           | cg02959669/cg12048                                                                                                                                                                                                                                                                         | 0.65073397  | 0.494116667 | 0.3368489   | -0.157267767 | 1.97E-04 | 6.67E-03 |
| TSS1500 | ZNF256   | 19 | 58459358/5845928 2<br>3<br>150284600/150284 2<br>796                                                                                                                                                                                                                               | cg03289872/cg08063<br>125/cg21287936/cg2<br>4411929<br>cg04154138/cg16708<br>981                                                                                                                                                                                                           | 0.091643475 | 0.136415784 | 0.291683919 | 0.155268135  | 2.76E-03 | 1.98E-02 |
| TSS1500 | ZNF300   | 5  | 150284600/150284 2<br>796                                                                                                                                                                                                                                                          | cg18237551/cg21228<br>005                                                                                                                                                                                                                                                                  | 0.367075915 | 0.360543939 | 0.578431705 | 0.217887766  | 1.69E-04 | 6.41E-03 |
| TSS1500 | ZNF667   | 19 | 56989102/5698954 4<br>3/56989812/56989 4<br>740                                                                                                                                                                                                                                    | cg03289872/cg08063<br>125/cg21287936/cg2<br>4411929<br>cg04154138/cg16708<br>981                                                                                                                                                                                                           | 0.414287348 | 0.566804689 | 0.724532957 | 0.157728268  | 7.05E-04 | 1.01E-02 |
| TSS1500 | ZNF677   | 19 | 53758521/5375860 2<br>9                                                                                                                                                                                                                                                            | cg04154138/cg16708<br>981                                                                                                                                                                                                                                                                  | 0.35791966  | 0.495035972 | 0.645107336 | 0.150071364  | 3.44E-04 | 7.97E-03 |
| TSS1500 | ZNF813   | 19 | 53970618/5397058 3<br>5/53970754<br>50133212/5013313 3                                                                                                                                                                                                                             | cg05503527/cg09435<br>109/cg13948710<br>cg00303745/cg09921                                                                                                                                                                                                                                 | 0.146824803 | 0.20720027  | 0.363508075 | 0.156307805  | 3.37E-04 | 7.95E-03 |
| TSS1500 | ZPBP     | 7  | 50133212/5013313 3<br>1/50133100<br>16180048/1618005 5<br>5/16180072/16180 7                                                                                                                                                                                                       | 682/cg10349880<br>cg00339556/cg01791<br>874/cg16150752/cg1<br>7030173/cg17712694<br>/cg21901718/cg2509<br>cg14932016                                                                                                                                                                       | 0.84136324  | 0.669956002 | 0.48186017  | -0.188095832 | 3.64E-05 | 4.78E-03 |
| TSS200  | MARCH11  | 5  | 5/16180072/16180 7<br>062/16180068/161 7<br>80076/16180033 3<br>236849653                                                                                                                                                                                                          | cg00339556/cg01791<br>874/cg16150752/cg1<br>7030173/cg17712694<br>/cg21901718/cg2509<br>cg14932016                                                                                                                                                                                         | 0.288388658 | 0.381014661 | 0.566613481 | 0.18559882   | 3.01E-03 | 3.27E-02 |
| TSS200  | ACTN2    | 1  | 236849653                                                                                                                                                                                                                                                                          | cg14932016                                                                                                                                                                                                                                                                                 | 0.27037604  | 0.281198133 | 0.474309027 | 0.193110894  | 1.88E-04 | 1.06E-02 |
| TSS200  | ADAMTS16 | 5  | 5140406                                                                                                                                                                                                                                                                            | cg01717727                                                                                                                                                                                                                                                                                 | 0.375045035 | 0.4556967   | 0.623165405 | 0.167468705  | 5.19E-04 | 1.39E-02 |
| TSS200  | ADAMTS18 | 16 | 77469167                                                                                                                                                                                                                                                                           | cg02186542                                                                                                                                                                                                                                                                                 | 0.273228825 | 0.282129683 | 0.439599427 | 0.157469744  | 4.71E-04 | 1.35E-02 |
| TSS200  | ADAMTS5  | 21 | 28339442/2833948 3<br>7/28339477<br>1779835/1779904/                                                                                                                                                                                                                               | cg08190291/cg13601<br>496/cg19523085<br>cg02899206/cg03410                                                                                                                                                                                                                                 | 0.220681917 | 0.294013407 | 0.471714923 | 0.177701515  | 8.79E-04 | 1.72E-02 |
| TSS200  | ADARB2   | 10 | 1779819/1779730/ 5<br>1779760<br>123167522/123167 2<br>507                                                                                                                                                                                                                         | 436/cg06730723/cg1<br>4590817/cg24184687<br>cg04138502/cg15993<br>383<br>cg03384579/cg05659                                                                                                                                                                                                | 0.120993329 | 0.238864613 | 0.388903645 | 0.150039032  | 5.51E-03 | 4.76E-02 |
| TSS200  | ADCY5    | 3  | 70995440/7099552 2<br>2/70995351/70995 7<br>459/70995444/709 7                                                                                                                                                                                                                     | cg04138502/cg15993<br>383<br>cg03384579/cg05659<br>187/cg08857144/cg1<br>5170605/cg23427269                                                                                                                                                                                                | 0.263099946 | 0.310493049 | 0.50221849  | 0.191725442  | 2.28E-04 | 1.12E-02 |
| TSS200  | ADD2     | 2  | 2/70995351/70995 7<br>459/70995444/709 7<br>95349/70995527<br>6/344553/6/34464                                                                                                                                                                                                     | cg08190291/cg13601<br>496/cg19523085<br>cg02899206/cg03410<br>/cg24347663/cg2563<br>cg01588438/cg08090                                                                                                                                                                                     | 0.121104374 | 0.227999381 | 0.42689553  | 0.198896149  | 5.24E-03 | 4.61E-02 |
| TSS200  | ADHFE1   | 8  | 0/67344556/67344 6<br>588/67344642/673 6<br>44665                                                                                                                                                                                                                                  | 772/cg09383816/cg1<br>8065361/cg19283840<br>/cg20295442                                                                                                                                                                                                                                    | 0.237875042 | 0.386282476 | 0.615113493 | 0.228831016  | 1.44E-04 | 1.06E-02 |



|        |           |    |                                                  |   |                                                        |             |             |             |              |            |             |
|--------|-----------|----|--------------------------------------------------|---|--------------------------------------------------------|-------------|-------------|-------------|--------------|------------|-------------|
| TSS200 | ADRA1A    | 8  | 26722965/26722933                                | 2 | cg20303399/cg23008606                                  | 0.388836703 | 0.4551341   | 0.605570534 | 0.150436434  | 1.26E-04   | 9.92E-03    |
| TSS200 | AEBP1     | 7  | 44143774                                         | 1 | cg25289803                                             | 0.126515985 | 0.170135441 | 0.327045437 | 0.156909997  | 5.36E-03   | 4.67E-02    |
| TSS200 | ARMC3     | 10 | 23216847/23216843/23216841                       | 3 | cg06560760/cg08839858/cg19523082                       | 0.156176652 | 0.256517689 | 0.475421363 | 0.218903674  | 7.87E-04   | 1.63E-02    |
| TSS200 | BAALC     | 8  | 104152750/104152754                              | 2 | cg10163483/cg14284952                                  | 0.24627411  | 0.358346559 | 0.546722218 | 0.188375659  | 1.59E-03   | 2.32E-02    |
| TSS200 | BARHL2    | 1  | 91182989/91182856                                | 2 | cg00010742/cg17241310                                  | 0.319597535 | 0.354711339 | 0.507436764 | 0.152725425  | 9.03E-04   | 0.01746453  |
| TSS200 | BPIL1     | 20 | 31595346/31595360                                | 2 | cg10968815/cg13696012                                  | 0.74723877  | 0.610260339 | 0.45784017  | -0.152420168 | 4.60E-05   | 7.87E-03    |
| TSS200 | BSX       | 11 | 122852454/122852523/122852429/122852412/12285241 | 6 | cg02078690/cg02159381/cg02179652/cg04092231/cg11141380 | 0.353419475 | 0.420348966 | 0.586804642 | 0.166455676  | 2.32E-05   | 6.89E-03    |
| TSS200 | C11orf87  | 11 | 71122852461/109292803/109292809/109292789        | 3 | /cg27314569/cg11473876/cg16359550/cg27471124           | 0.343952475 | 0.433410228 | 0.584383979 | 0.150973751  | 2.02E-04   | 1.06E-02    |
| TSS200 | C12orf56  | 12 | 64784498/64784483                                | 2 | cg13867865/cg15731056                                  | 0.208991981 | 0.256064203 | 0.47905462  | 0.222990417  | 2.99E-04   | 1.18E-02    |
| TSS200 | C13orf30  | 13 | 43355514                                         | 1 | cg24818699                                             | 0.725343805 | 0.683871289 | 0.530825736 | -0.153045553 | 7.18E-04   | 1.55E-02    |
| TSS200 | C14orf177 | 14 | 99177777                                         | 1 | cg06906435                                             | 0.632554745 | 0.557396089 | 0.363526641 | -0.193869448 | 1.21E-04   | 9.92E-03    |
| TSS200 | C14orf39  | 14 | 60952945/60952933/60952781                       | 3 | cg12189551/cg26132298/cg26248878                       | 0.279060523 | 0.386990292 | 0.543512184 | 0.156521892  | 4.49E-03   | 0.041973444 |
| TSS200 | C16orf73  | 16 | 1922155/1922216/1922207                          | 5 | cg03467725/cg05041351/cg07775371/cg08959396/cg27308021 | 0.155952418 | 0.191239859 | 0.348454698 | 0.157214839  | 3.08E-04   | 1.20E-02    |
| TSS200 | C17orf104 | 17 | 42733698/4273372                                 | 6 | cg02932314/cg12127472/cg12781700/cg12892303/cg15000379 | 0.327629685 | 0.414478568 | 0.574156066 | 0.159677498  | 1.24E-03   | 2.02E-02    |
| TSS200 | C18orf34  | 18 | 33600/31020754/31020806                          | 2 | /cg17269633/cg00625334/cg05994094                      | 0.264556073 | 0.34116821  | 0.511657836 | 0.170489627  | 1.73E-03   | 0.024223818 |
| TSS200 | C1orf70   | 1  | 1475742                                          | 1 | cg15487867                                             | 0.078401843 | 0.225160943 | 0.516900801 | 0.291739858  | 7.76E-05   | 9.06E-03    |
| TSS200 | C1QL2     | 2  | 119916510/119916571/119916662/119916581/11991648 | 5 | 721/cg16849609/cg17319142/ca21858380                   | 0.283311327 | 0.397913469 | 0.549646376 | 0.151732907  | 2.81E-03   | 3.13E-02    |
| TSS200 | C4orf47   | 4  | 186350505                                        | 1 | cg18740810                                             | 0.627730495 | 0.531216306 | 0.377883173 | -0.153333133 | 6.44E-06   | 5.78E-03    |
| TSS200 | CACNG8    | 19 | 54466187                                         | 1 | cg23752563                                             | 0.33931252  | 0.383725244 | 0.608583723 | 0.224858478  | 1.90E-06   | 4.51E-03    |
| TSS200 | CCDC140   | 2  | 223162692/223162797/223162800/22                 | 4 | cg01790894/cg10416206/cg13767755/cg14093610            | 0.266659694 | 0.281424995 | 0.436827723 | 0.155402728  | 1.72E-04   | 1.06E-02    |
| TSS200 | CCDC37    | 3  | 126113663/126113658/126113682/126113707/12611369 | 7 | cg01815671/cg09686443/cg11229862/cg20312228/cg20952286 | 0.296193755 | 0.326978721 | 0.5068705   | 0.179891779  | 3.00E-04   | 1.18E-02    |
| TSS200 | CCDC70    | 13 | 51126113743/126152436047                         | 1 | /cg21109744/cg2381cg11631011                           | 0.71729355  | 0.560230817 | 0.398430955 | -0.161799862 | 3.50E-04   | 1.24E-02    |
| TSS200 | CDH10     | 5  | 24644988/24645093/24645065/24645024              | 4 | cg02617312/cg05683049/cg17030055/cg26161643            | 0.200284973 | 0.257347642 | 0.414638753 | 0.157291112  | 5.91E-05   | 8.40E-03    |
| TSS200 | CDH18     | 5  | 19988368/19988366                                | 2 | cg16503924/cg18710278                                  | 0.371138315 | 0.453583656 | 0.615012223 | 0.161428567  | 0.00097361 | 0.018233792 |
| TSS200 | CDH19     | 18 | 64271341                                         | 1 | cg16489926                                             | 0.75453834  | 0.579833833 | 0.40824685  | -0.171586983 | 8.62E-06   | 0.005906912 |

|        |              |    |                                                                 |   |                                      |             |             |             |              |          |             |
|--------|--------------|----|-----------------------------------------------------------------|---|--------------------------------------|-------------|-------------|-------------|--------------|----------|-------------|
| TSS200 | CHL1         | 3  | 238615/238611/238618/238496                                     | 4 | cg07746943/cg08421                   | 0.32114382  | 0.329874344 | 0.537976477 | 0.208102133  | 4.25E-05 | 7.61E-03    |
| TSS200 | CHST10       | 2  | 101034279/101034257/101034270/96204870/9620485                  | 3 | 5482786<br>cg03853987/cg16882        | 0.110492482 | 0.247492011 | 0.52275403  | 0.275262019  | 1.07E-03 | 1.89E-02    |
| TSS200 | CLDN10       | 13 | 6/96204917/96204873/96204854/96204860/66613334/6661322          | 6 | 163/cg09469554/cg10305311/cg16232183 | 0.169117983 | 0.278977054 | 0.520358225 | 0.241381171  | 1.13E-04 | 9.92E-03    |
| TSS200 | CMTM2        | 16 | 0/66613278/66613206/66613273/66613266                           | 6 | 863/cg06666025/cg07153665/cg09854734 | 0.326302001 | 0.389529445 | 0.592895287 | 0.203365842  | 8.95E-05 | 9.57E-03    |
| TSS200 | CNBD1        | 8  | 87878605                                                        | 1 | 1/cg16626067                         | 0.69649682  | 0.572691322 | 0.398347268 | -0.174344054 | 1.59E-05 | 6.89E-03    |
| TSS200 | CNTNAP5      | 2  | 124782817/124782831/124782713                                   | 3 | cg00374101<br>cg04168670/cg08790     | 0.445512275 | 0.494088333 | 0.675895377 | 0.181807044  | 2.82E-05 | 6.89E-03    |
| TSS200 | COLEC12      | 18 | 500817                                                          | 1 | 440/ca12919006                       | 0.118796845 | 0.134338515 | 0.334893467 | 0.200554952  | 3.42E-04 | 0.01228057  |
| TSS200 | CRHR2        | 7  | 3/30722177/30722320                                             | 4 | cg16943083<br>cg01718447/cg04863     | 0.184872435 | 0.304892999 | 0.468855352 | 0.163962352  | 5.12E-03 | 4.55E-02    |
| TSS200 | CYP1A2       | 15 | 75041150                                                        | 1 | 452/cg07658503/cg21773872            | 0.81962889  | 0.702935961 | 0.541688595 | -0.161247366 | 2.50E-04 | 1.12E-02    |
| TSS200 | DBC1         | 9  | 122131895                                                       | 1 | cg00374101<br>cg12821278             | 0.38583843  | 0.46795035  | 0.665142118 | 0.197191768  | 2.01E-03 | 0.026173398 |
| TSS200 | DBX2         | 12 | 45445057/4544490                                                | 5 | cg12915695/cg13031                   | 0.205081183 | 0.259889082 | 0.434139299 | 0.174250217  | 2.17E-03 | 2.69E-02    |
| TSS200 | DGKG         | 3  | 2/45444895/45445061/45445023/186080180/186080                   | 4 | 210/cg13186327/cg16080781/ca26274596 | 0.100521938 | 0.145630393 | 0.326807706 | 0.181177314  | 9.27E-05 | 9.69E-03    |
| TSS200 | DKFZP434H168 | 16 | 6080023/56228498/5622851                                        | 7 | 5808906<br>cg00246932/cg01157        | 0.113126065 | 0.229547982 | 0.505039465 | 0.275491483  | 1.66E-04 | 1.06E-02    |
| TSS200 | DNAH11       | 7  | 1/56228505/56228577/56228467/56228495/56228442/21582758/2158274 | 3 | 070/cg02667667/cg06780839/cg07700514 | 0.158832395 | 0.15329108  | 0.341847322 | 0.188556242  | 1.13E-03 | 1.94E-02    |
| TSS200 | DRD4         | 11 | 9/21582745                                                      | 4 | 341/ca16474297<br>cg00556112/cg06825 | 0.132138934 | 0.124251499 | 0.296712788 | 0.172461289  | 1.90E-03 | 2.54E-02    |
| TSS200 | EDNRB        | 13 | 637173/637170/637175/637162                                     | 5 | 0931042<br>cg04390523/cg06179        | 0.245177538 | 0.395607701 | 0.575186885 | 0.179579184  | 1.56E-04 | 1.06E-02    |
| TSS200 | EFHA2        | 8  | 78493100/7849301                                                | 3 | 060/cg06971129/cg13818654/ca15836660 | 0.119189488 | 0.235860501 | 0.466411998 | 0.230551496  | 1.23E-04 | 9.92E-03    |
| TSS200 | EID3         | 12 | 5/16884549/104697389/104697545/104697387/104697419/10469752     | 7 | cg00720475/cg05956                   | 0.245901051 | 0.400084094 | 0.594826503 | 0.194742409  | 5.46E-04 | 1.42E-02    |
| TSS200 | EMID2        | 7  | 6/104697532/1046101006063/101006                                | 6 | 407/cg18633684/cg20923245/cg21234561 | 0.313617047 | 0.41950658  | 0.576084525 | 0.156577945  | 1.53E-03 | 2.28E-02    |
| TSS200 | EVC          | 4  | 019/101006089/101006035/10100605                                | 3 | 163/cg18762727/cg23424003/cg27179533 | 0.127460136 | 0.230972145 | 0.452348692 | 0.221376547  | 3.53E-04 | 1.24E-02    |
| TSS200 | FABP4        | 8  | 2/101006058/5712884/5712840/5712842                             | 1 | 887/ca25213928<br>cg19422565         | 0.687758385 | 0.65046045  | 0.498557782 | -0.151902668 | 2.86E-06 | 0.004505573 |

|        |          |    |                                                                                                  |   |                                                                                             |             |             |             |              |             |             |
|--------|----------|----|--------------------------------------------------------------------------------------------------|---|---------------------------------------------------------------------------------------------|-------------|-------------|-------------|--------------|-------------|-------------|
| TSS200 | FAM184B  | 4  | 17783205/1778329<br>4/17783261/17783<br>240/17783331/177<br>83322<br>68981866/6898185            | 6 | cg01886556/cg02108<br>033/cg05624214/cg1<br>5917116/cg18790597                              | 0.215687576 | 0.234713841 | 0.420879943 | 0.186166102  | 1.81E-03    | 2.47E-02    |
| TSS200 | FAM19A4  | 3  | 4/68981877/68981<br>852/68981890/689<br>81895<br>126237464/126237                                | 6 | 082/cg12412079/cg1<br>2417685/cg13921352                                                    | 0.25409692  | 0.303376729 | 0.531583568 | 0.22820684   | 1.47E-04    | 1.06E-02    |
| TSS200 | FAT4     | 4  | 371/126237421/12<br>6237373/12623751<br>16085148                                                 | 5 | 638/cg08644023/cg1<br>0731073/ca15795630<br>cg04897742                                      | 0.191660035 | 0.241493606 | 0.408754979 | 0.167261373  | 2.04E-04    | 1.06E-02    |
| TSS200 | FBLIM1   | 1  | 15500249/1550027<br>0                                                                            | 1 | cg24872782/cg26134<br>895<br>cg02093112/cg06091                                             | 0.070202859 | 0.292923521 | 0.476116717 | 0.183193196  | 0.001446383 | 0.021994223 |
| TSS200 | FBXL7    | 5  | 6679495/6679482/<br>6679499/6679484/<br>6679476/6679541                                          | 2 | 013/cg07540103/cg0<br>8843809/cg11871421                                                    | 0.15106963  | 0.139730535 | 0.296106291 | 0.156375756  | 2.45E-03    | 2.88E-02    |
| TSS200 | FBXO39   | 17 | 157670710/157670<br>825<br>81187601/8118760                                                      | 6 | cg08786003/cg15602<br>298<br>cg10031614/cg12528                                             | 0.414734219 | 0.514230606 | 0.680763773 | 0.166533166  | 1.85E-04    | 1.06E-02    |
| TSS200 | FCRL3    | 1  | 5/81187610<br>61885236/6188528<br>5/61885270/61885                                               | 2 | 713/ca20528583<br>cg06763829/cg07785<br>314/cg09196068/cg1                                  | 0.71051115  | 0.669765689 | 0.479001236 | -0.190764453 | 3.53E-04    | 1.24E-02    |
| TSS200 | FGF5     | 4  | 249/61885291/618<br>85262<br>62584024/6258396<br>8/62584005/62584                                | 3 | 5571277/cg18412834<br>/ca1258057<br>cg01613638/cg01866                                      | 0.140989149 | 0.219427081 | 0.391214603 | 0.171787522  | 2.03E-03    | 2.62E-02    |
| TSS200 | FLJ16779 | 20 | 037/62583919/625<br>83962<br>159590231<br>144621938/144621                                       | 6 | 038/cg05173737/cg1<br>0227327/cg14926717<br>/ca15897970<br>cg00157796<br>cg08334984/cg09556 | 0.069564278 | 0.171933272 | 0.37376137  | 0.201828099  | 5.24E-04    | 1.40E-02    |
| TSS200 | FLJ43390 | 14 | 4621971/14462194<br>130647004<br>26505127/2650506<br>9/26505156<br>154728308<br>31361687/3136159 | 6 | 0227327/cg14926717<br>/ca15897970<br>cg00157796<br>cg08334984/cg09556                       | 0.139913616 | 0.27133286  | 0.422528908 | 0.151196048  | 3.04E-03    | 3.30E-02    |
| TSS200 | FNDC1    | 6  | 952/144621898/14<br>4621971/14462194<br>130647004                                                | 1 | cg00157796<br>cg08334984/cg09556                                                            | 0.201576911 | 0.360219017 | 0.580746665 | 0.220527648  | 1.78E-03    | 2.45E-02    |
| TSS200 | FREM3    | 4  | 26505127/2650506<br>9/26505156<br>154728308<br>31361687/3136159                                  | 5 | 043/cg10056356/cg1<br>5042811/ca17495719<br>cg21885046                                      | 0.276775177 | 0.444996611 | 0.597750659 | 0.152754048  | 2.11E-03    | 2.67E-02    |
| TSS200 | FZD10    | 12 | 74961809/7496196<br>6/74962000/74961<br>968<br>11561593/1156153                                  | 1 | cg21885046<br>cg00733780/cg04838                                                            | 0.255520285 | 0.31653685  | 0.479572268 | 0.163035418  | 8.25E-05    | 9.16E-03    |
| TSS200 | GAD2     | 10 | 3/31361701/31361<br>760/31361692/313<br>61757<br>172734514/172734                                | 3 | cg00733780/cg04838<br>147/cg23050442<br>cg02593932<br>cg04050000/cg10258                    | 0.234790059 | 0.393877345 | 0.584842092 | 0.190964748  | 1.07E-03    | 0.018927454 |
| TSS200 | GALNT13  | 2  | 3/31361701/31361<br>760/31361692/313<br>61757<br>172734514/172734                                | 1 | cg02593932<br>cg04050000/cg10258                                                            | 0.38300914  | 0.394353661 | 0.590584686 | 0.196231025  | 2.28E-05    | 6.89E-03    |
| TSS200 | GALNT14  | 2  | 507/172734431<br>74961809/7496196<br>6/74962000/74961<br>968<br>11561593/1156153                 | 6 | 271/cg14514751/cg2<br>0599798/cg22395019<br>/ca26988215<br>cg09772954/cg14307               | 0.127646205 | 0.155388395 | 0.307139157 | 0.151750763  | 3.33E-04    | 1.22E-02    |
| TSS200 | GALNTL6  | 4  | 507/172734431<br>74961809/7496196<br>6/74962000/74961<br>968<br>11561593/1156153                 | 3 | cg09772954/cg14307<br>443/ca22153181<br>cg03032214/cg03659                                  | 0.275216999 | 0.353055264 | 0.547891504 | 0.19483624   | 7.58E-05    | 9.06E-03    |
| TSS200 | GALR1    | 18 | 1/11561584/11561<br>620<br>10882238/1088224<br>0/10882250<br>172166234/172166<br>258/172166242   | 4 | 519/cg17911318/cg2<br>0872937<br>cg00397986/cg02726                                         | 0.361228119 | 0.356662058 | 0.524020253 | 0.167358195  | 1.26E-03    | 2.04E-02    |
| TSS200 | GATA4    | 8  | 1/11561584/11561<br>620<br>10882238/1088224<br>0/10882250<br>172166234/172166<br>258/172166242   | 4 | 121/cg09951349/cg1<br>4900471<br>cg09829319/cg14250                                         | 0.206063138 | 0.286203333 | 0.487388156 | 0.201184823  | 6.35E-05    | 8.63E-03    |
| TSS200 | GCM2     | 6  | 0/10882250<br>172166234/172166<br>258/172166242                                                  | 3 | 833/ca20229534<br>cg15987088/cg17152<br>757/ca24599434                                      | 0.197304442 | 0.244470093 | 0.457785477 | 0.213315384  | 1.69E-03    | 2.40E-02    |
| TSS200 | GHSR     | 3  | 258/172166242                                                                                    | 3 | 757/ca24599434                                                                              | 0.287919458 | 0.372009895 | 0.533990108 | 0.161980213  | 2.13E-04    | 1.09E-02    |

|        |         |    |                                                                          |    |                                                                                      |             |             |             |             |             |            |
|--------|---------|----|--------------------------------------------------------------------------|----|--------------------------------------------------------------------------------------|-------------|-------------|-------------|-------------|-------------|------------|
| TSS200 | GJD2    | 15 | 35046765/35046760<br>175750583/175750                                    | 2  | cg11525643/cg21053529<br>cg02521102/cg05990                                          | 0.413471005 | 0.549616089 | 0.711265257 | 0.161649168 | 9.86E-05    | 9.77E-03   |
| TSS200 | GLRA3   | 4  | 562/175750527/175750637/175750510/175750507<br>93879022/9387896          | 6  | 549/cg09841488/cg21365094/cg23697278<br>/cg26226802<br>cg00191477/cg07529            | 0.232201128 | 0.307315318 | 0.494499608 | 0.18718429  | 5.15E-04    | 1.39E-02   |
| TSS200 | GPC6    | 13 | 9/93879042/93879008<br>110300233/110300                                  | 4  | 657/cg23246978/cg25772299<br>cg01261007/cg01769                                      | 0.162927445 | 0.19970389  | 0.350968335 | 0.151264445 | 4.76E-03    | 4.36E-02   |
| TSS200 | GPR6    | 6  | 218/110300101/110300146/11030009<br>158141570/158141                     | 5  | 232/cg05756933/cg12800028/ca15381304<br>cg00699993/cg10410                           | 0.391339138 | 0.407526868 | 0.563711615 | 0.156184747 | 1.81E-04    | 1.06E-02   |
| TSS200 | GRIA2   | 4  | 542<br>105481319/105481317/105481319/105481319/105481                    | 2  | 142<br>cg00343033/cg03223<br>817/cg04747226/cg0                                      | 0.399915025 | 0.481114561 | 0.637241957 | 0.156127396 | 9.75E-05    | 9.77E-03   |
| TSS200 | GRIA4   | 11 | 5481322/10548077<br>1/105480788/105480790/105481283/<br>105481406/105481 | 11 | 7972135/cg09147777<br>/cg11308643/cg1275<br>4421/cg15603568/cg<br>21217024/cg2355968 | 0.303668483 | 0.408511226 | 0.583959483 | 0.175448258 | 3.41E-04    | 1.23E-02   |
| TSS200 | GRM7    | 3  | 6902689<br>28366645/2836660                                              | 1  | cg24213507<br>cg03388293/cg05344                                                     | 0.21921605  | 0.296931333 | 0.473498077 | 0.176566744 | 2.62E-03    | 2.99E-02   |
| TSS200 | GSX1    | 13 | 0/28366759/28366598/28366606/28366702<br>106889320/106889                | 6  | 430/cg10071824/cg11354629/cg14168923<br>/cg17369527<br>cg02989669/cg12243            | 0.279743824 | 0.309918543 | 0.464428891 | 0.154510348 | 0.005704538 | 0.04878246 |
| TSS200 | GUCY1A2 | 11 | 329/106889318/106889364/10688933<br>43152125/4315202                     | 5  | 375/cg15847198/cg20905516/ca25918303<br>cg03004999/cg13298                           | 0.078953429 | 0.122064987 | 0.326497579 | 0.204432592 | 2.92E-03    | 3.21E-02   |
| TSS200 | HECW1   | 7  | 1<br>54393687/5439370                                                    | 2  | 841<br>cg03215137/cg13233                                                            | 0.254652345 | 0.296185131 | 0.465199643 | 0.169014513 | 1.66E-04    | 1.06E-02   |
| TSS200 | HOXC9   | 12 | 9/54393725<br>176981336/176981                                           | 3  | 407/cg21272774<br>cg05979020/cg13217                                                 | 0.314765248 | 0.420804026 | 0.596110945 | 0.17530692  | 2.73E-04    | 1.15E-02   |
| TSS200 | HOXD10  | 2  | 469/176981328/176981422<br>25703160/2570315                              | 4  | 260/cg18115040/cg25371634<br>cg24862668/cg26933                                      | 0.440592453 | 0.334801396 | 0.509576    | 0.174774604 | 3.78E-04    | 1.27E-02   |
| TSS200 | HS3ST4  | 16 | 3<br>2161586                                                             | 2  | 063<br>cg25163476                                                                    | 0.116458718 | 0.118546268 | 0.275044375 | 0.156498107 | 4.48E-03    | 4.19E-02   |
| TSS200 | IGF2AS  | 11 | 105036811/105036                                                         | 1  | cg08050235/cg17567                                                                   | 0.230925235 | 0.272385617 | 0.438010264 | 0.165624647 | 1.08E-03    | 1.89E-02   |
| TSS200 | INA     | 10 | 863/105036747/105036727<br>66582780/6658280                              | 4  | 560/cg23003534/cg24680586<br>cg20395892/cg26279                                      | 0.143560112 | 0.243447131 | 0.447113657 | 0.203666526 | 1.91E-03    | 2.54E-02   |
| TSS200 | IRAK3   | 12 | 5<br>391680/391743/391683/391664                                         | 2  | 550<br>cg03410961/cg05766                                                            | 0.330652861 | 0.392081044 | 0.569845831 | 0.177764787 | 1.98E-04    | 1.06E-02   |
| TSS200 | IRF4    | 6  | 1683/391664<br>49250252/4925018                                          | 4  | 140/cg16046028/cg16643840<br>cg15085603/cg16732                                      | 0.082199335 | 0.178686749 | 0.337683454 | 0.158996704 | 2.38E-03    | 2.84E-02   |
| TSS200 | IZUMO1  | 19 | 0<br>133938788/133938                                                    | 2  | 175<br>cg03637878/cg19055                                                            | 0.124496334 | 0.157671631 | 0.313989755 | 0.156318125 | 4.56E-04    | 1.34E-02   |
| TSS200 | JAM3    | 11 | 676/133938757/133938810                                                  | 4  | 936/cg24140030/cg24899571                                                            | 0.146781501 | 0.214326459 | 0.413833505 | 0.199507045 | 2.56E-05    | 6.89E-03   |

|        |           |    |                                           |   |                                          |             |             |             |              |          |             |
|--------|-----------|----|-------------------------------------------|---|------------------------------------------|-------------|-------------|-------------|--------------|----------|-------------|
| TSS200 | KCNA1     | 12 | 5019017/5019004/<br>5019066/5018984/      | 5 | cg03929977/cg10569<br>606/cg10767336/cg1 | 0.181326338 | 0.291514145 | 0.499834589 | 0.208320445  | 1.58E-04 | 1.06E-02    |
| TSS200 | KCNA3     | 1  | 5019024<br>111217691/111217               | 4 | 2080391/cg15543616<br>cg06750832/cg07808 | 0.25023847  | 0.437710297 | 0.609975493 | 0.172265196  | 4.02E-04 | 1.30E-02    |
| TSS200 | KCNA7     | 19 | 1217785<br>49576200/4957624               | 2 | 6071016<br>cg01501819/cg26450            | 0.257687215 | 0.216959519 | 0.37117688  | 0.15421736   | 3.02E-03 | 3.28E-02    |
| TSS200 | KCNK12    | 2  | 47797488/4779756                          | 3 | 866<br>cg03603951/cg04431                | 0.245250457 | 0.372603034 | 0.554110771 | 0.181507737  | 2.92E-04 | 1.17E-02    |
| TSS200 | KCNQ5     | 6  | 9/47797590                                | 1 | 946/cg08074851                           | 0.236188001 | 0.456947117 | 0.638643491 | 0.181696374  | 1.77E-03 | 2.45E-02    |
| TSS200 | LCE1F     | 1  | 73331405                                  | 1 | cg00852573                               | 0.657349355 | 0.581917528 | 0.429483991 | -0.152433537 | 5.07E-06 | 5.00E-03    |
| TSS200 | LHCGR     | 2  | 152748838                                 | 2 | cg01915081                               | 0.385139748 | 0.376765842 | 0.550063805 | 0.173297963  | 6.57E-04 | 1.52E-02    |
| TSS200 | LOC157627 | 8  | 48982957/4898295                          | 5 | cg12351433/cg19403                       | 0.277610124 | 0.377193257 | 0.554742041 | 0.177548784  | 8.14E-04 | 1.65E-02    |
| TSS200 | LOC200726 | 2  | 0<br>9760957/9760869/<br>9760880/9760855/ | 4 | 014<br>cg00571033/cg10866                | 0.328318215 | 0.440644479 | 0.59412389  | 0.153479411  | 1.58E-04 | 1.06E-02    |
| TSS200 | LOC643387 | 2  | 9760877<br>207506975/207506               | 5 | 911/cg17165841/cg2                       | 0.443331268 | 0.496596531 | 0.651977202 | 0.155380671  | 1.99E-05 | 6.89E-03    |
| TSS200 | LPPR4     | 1  | 991/207507001/20                          | 6 | 1541833<br>cg06732439/cg07323            | 0.251086583 | 0.325342127 | 0.476043734 | 0.150701607  | 2.25E-03 | 2.74E-02    |
| TSS200 | LRFN5     | 14 | 169/239140190/23                          | 3 | 141/cg13530938/cg2                       | 0.34677136  | 0.464009417 | 0.635554882 | 0.171545465  | 9.92E-04 | 1.83E-02    |
| TSS200 | LRRC3B    | 3  | 9140296/23914018<br>99729804/9972980      | 3 | 1272465/cg23497383<br>cg03580297/cg03646 | 0.259333422 | 0.366976277 | 0.51808965  | 0.151113373  | 5.34E-04 | 0.014094129 |
| TSS200 | LRRC67    | 8  | 7/99729757/99729                          | 4 | 889/cg05596294/cg0                       | 0.108376956 | 0.129075504 | 0.283722116 | 0.154646612  | 4.97E-03 | 4.46E-02    |
| TSS200 | MAP3K13   | 3  | 790/99729769/997                          | 3 | 6060191/cg18947801                       | 0.369315628 | 0.489911959 | 0.65445397  | 0.16454201   | 2.79E-04 | 1.16E-02    |
| TSS200 | MCHR2     | 6  | 29780<br>42076759/4207671                 | 4 | 1189727<br>cg11743827/cg19418            | 0.492219206 | 0.588150617 | 0.743534964 | 0.155384347  | 1.09E-04 | 9.92E-03    |
| TSS200 | MGC2889   | 3  | 0/42076757                                | 1 | 951/cg21574349                           | 0.25417425  | 0.296998489 | 0.503987091 | 0.206988602  | 2.59E-04 | 0.011320864 |
| TSS200 | MIR124-1  | 8  | 26664181/2666411                          | 2 | cg06610484/cg09393                       | 0.17467567  | 0.290067164 | 0.54393962  | 0.253872457  | 3.72E-04 | 1.27E-02    |
| TSS200 | MIR129-2  | 11 | 5/26664285<br>67940929/6794091            | 6 | 545/cg15744359/cg2                       | 0.279857002 | 0.39352092  | 0.603149488 | 0.209628568  | 6.02E-04 | 1.48E-02    |
| TSS200 | MIR137    | 1  | 3/67940823/67940                          | 3 | 1189727<br>cg11743827/cg19418            | 0.279652767 | 0.369001891 | 0.565508567 | 0.196506676  | 3.18E-04 | 1.21E-02    |
| TSS200 | MIR34B    | 11 | 185080905/185080                          | 5 | 835<br>cg01939477/cg05376                | 0.161390003 | 0.272821181 | 0.522451961 | 0.24963078   | 1.14E-03 | 1.95E-02    |
| TSS200 | MIR889    | 14 | 816/185080951<br>100442105/100442         | 1 | 374/cg14416371/cg1                       | 0.77199904  | 0.711557767 | 0.545312605 | -0.166245162 | 2.04E-04 | 1.06E-02    |
| TSS200 | MMP1      | 11 | 118/100442151/10                          | 1 | 4944647/cg15556502                       | 0.720343735 | 0.589016539 | 0.404577436 | -0.184439103 | 1.04E-04 | 0.00976695  |

|        |         |    |                                                      |   |                                                                |             |             |             |              |             |             |
|--------|---------|----|------------------------------------------------------|---|----------------------------------------------------------------|-------------|-------------|-------------|--------------|-------------|-------------|
| TSS200 | MMP13   | 11 | 102826570/102826<br>565/102826469                    | 3 | cg14995062/cg19620<br>758/cq22658979                           | 0.752634965 | 0.557625358 | 0.396195655 | -0.161429704 | 1.17E-04    | 0.009915092 |
| TSS200 | MMP16   | 8  | 89339819<br>132722810/132722                         | 1 | cg04684553<br>cg01019028/cg08661                               | 0.136884403 | 0.189701904 | 0.422589257 | 0.232887353  | 1.73E-03    | 2.42E-02    |
| TSS200 | MOXD1   | 6  | 664/132722778/13                                     | 5 | 899/cg13640626/cg2<br>1294812/cq26178272<br>cg03347018/cg14546 | 0.127174648 | 0.13160774  | 0.286870367 | 0.155262627  | 2.81E-03    | 3.13E-02    |
| TSS200 | MSC     | 8  | 3/72756812/72756<br>901/72756839<br>17740977/1774107 | 5 | 394/cg20675505/cg2<br>4258699/cq25827490<br>cg07271264/cg22653 | 0.243803204 | 0.377820598 | 0.542911809 | 0.165091211  | 3.42E-03    | 3.55E-02    |
| TSS200 | MYOD1   | 11 | 0/17740967<br>102068989/102068                       | 3 | 976/cq26410450<br>cg10774877/cg15202                           | 0.2867668   | 0.3895931   | 0.629171445 | 0.239578345  | 5.24E-05    | 8.03E-03    |
| TSS200 | NALCN   | 13 | 996/102069010<br>19322676/1932277                    | 3 | 954/cq23056157<br>cg08181476/cg13724                           | 0.393140547 | 0.52235077  | 0.672534109 | 0.150183339  | 2.60E-03    | 2.99E-02    |
| TSS200 | NCAN    | 19 | 8/19322640/19322<br>678                              | 4 | 788/cg14316898/cg2<br>2090773                                  | 0.251505604 | 0.331823175 | 0.498386361 | 0.166563186  | 1.17E-03    | 1.97E-02    |
| TSS200 | NEFL    | 8  | 24814137<br>115880865/115881                         | 1 | cg01614020<br>cg09008705/cg13613                               | 0.31224608  | 0.329022772 | 0.493136339 | 0.164113566  | 5.74E-03    | 4.90E-02    |
| TSS200 | NGF     | 1  | 044/115880935<br>61886082/6188607                    | 3 | 280/cq13804058<br>cg01911708/cg08111                           | 0.223457763 | 0.326913945 | 0.504004302 | 0.177090357  | 0.001549176 | 0.022894986 |
| TSS200 | NKAIN4  | 20 | 9/61885926<br>66188441/6618843                       | 3 | 446/cq23942897<br>cg13215078/cg23484                           | 0.236576717 | 0.36331312  | 0.519381209 | 0.15606809   | 1.86E-03    | 2.51E-02    |
| TSS200 | NPAS4   | 11 | 3<br>32711517                                        | 2 | 234<br>cg18261223                                              | 0.236016241 | 0.321604036 | 0.514617661 | 0.193013625  | 7.14E-05    | 0.00906104  |
| TSS200 | NPR3    | 5  | 108487100/108487<br>072/108487183/10                 | 1 | cg07411432/cg08616<br>702/cg18093751/cg1                       | 0.083820478 | 0.107360912 | 0.28028821  | 0.172927298  | 6.09E-04    | 1.49E-02    |
| TSS200 | NR2E1   | 6  | 8487160/10848707<br>8/108487063<br>34398114/3439819  | 6 | 8918349/cg24104938<br>/cn24225517<br>cg03696345/cg08870        | 0.250054981 | 0.263668597 | 0.45908247  | 0.195413873  | 1.14E-04    | 9.92E-03    |
| TSS200 | OLIG2   | 21 | 9/34398131/34398<br>222/34398085/343<br>98226        | 6 | 743/cg15299832/cg2<br>3253569/cg27254482<br>/cn27357571        | 0.254698848 | 0.380666611 | 0.584316247 | 0.203649636  | 2.42E-04    | 1.12E-02    |
| TSS200 | OR10A6  | 11 | 7950225                                              | 1 | cg00444390                                                     | 0.602448615 | 0.459103683 | 0.296502964 | -0.16260072  | 6.02E-05    | 8.48E-03    |
| TSS200 | OR2G6   | 1  | 248684766                                            | 1 | cg25819275                                                     | 0.735832695 | 0.613297533 | 0.421585591 | -0.191711942 | 4.84E-05    | 7.87E-03    |
| TSS200 | OR51M1  | 11 | 5410452                                              | 1 | cg27093637                                                     | 0.659121375 | 0.532627261 | 0.382448045 | -0.150179216 | 7.22E-04    | 1.55E-02    |
| TSS200 | OR52N2  | 11 | 5841482                                              | 1 | cg03895540                                                     | 0.597053695 | 0.476309817 | 0.315040418 | -0.161269398 | 3.64E-05    | 7.18E-03    |
| TSS200 | OR5D16  | 11 | 55606216                                             | 1 | cg22937354                                                     | 0.53126326  | 0.466551078 | 0.300326945 | -0.166224132 | 5.77E-05    | 8.40E-03    |
| TSS200 | OR5W2   | 11 | 55682099<br>124413574/124413                         | 1 | cg26349048<br>cg03168749/cg25362                               | 0.58245256  | 0.516382378 | 0.341970668 | -0.17441171  | 1.49E-07    | 0.001173757 |
| TSS200 | OR8B12  | 11 | 728                                                  | 2 | 709                                                            | 0.720342223 | 0.607519542 | 0.452668577 | -0.154850964 | 1.50E-04    | 1.06E-02    |
| TSS200 | PABPC4L | 4  | 135122993                                            | 1 | cg11815708                                                     | 0.307129375 | 0.367251017 | 0.543101264 | 0.175850247  | 5.72E-04    | 1.44E-02    |
| TSS200 | PALM2   | 9  | 112402882<br>142682288/142682                        | 1 | cg02442436<br>cg15852572/cg27406                               | 0.23853382  | 0.350415644 | 0.511096645 | 0.160681001  | 1.56E-04    | 1.06E-02    |
| TSS200 | PAQR9   | 3  | 291<br>134070437/134070                              | 2 | 373<br>cg01408654/cg02562                                      | 0.081945404 | 0.091917814 | 0.253962734 | 0.16204492   | 4.99E-04    | 1.38E-02    |
| TSS200 | PCDH10  | 4  | 369/134070433/13<br>4070389/13407044                 | 6 | 431/cg10524033/cg1<br>2746059/cg14400886                       | 0.277331374 | 0.356228214 | 0.532015105 | 0.17578689   | 1.58E-03    | 2.32E-02    |
| TSS200 | PCDHGC4 | 5  | 1/134070416<br>140864578/140864                      | 5 | 756/cg15361590/cg1<br>5949044/cq23445461<br>cg10775792/cg27223 | 0.296129086 | 0.459798741 | 0.667165305 | 0.207366564  | 2.31E-05    | 6.89E-03    |
| TSS200 | PCP4L1  | 1  | 0864549/14086473<br>161228455/161228<br>496          | 2 | 727                                                            | 0.101200112 | 0.089806782 | 0.263402179 | 0.173595397  | 1.15E-04    | 9.92E-03    |

|        |          |    |                                                                     |   |                                                                                  |             |             |             |             |          |          |
|--------|----------|----|---------------------------------------------------------------------|---|----------------------------------------------------------------------------------|-------------|-------------|-------------|-------------|----------|----------|
| TSS200 | PDGFD    | 11 | 104035151/104035<br>204/104035136/10                                | 4 | cg03145963/cg08596<br>000/cg12027636/cg2                                         | 0.108127433 | 0.206495605 | 0.362922495 | 0.15642689  | 3.67E-03 | 3.71E-02 |
| TSS200 | PDPN     | 1  | 4035087<br>13910224/1391020<br>6/13910138/13910<br>164/13910209/139 | 6 | 6756506<br>cg02933679/cg10743<br>104/cg11791751/cg1<br>5563963/cg16277479        | 0.257968218 | 0.342812772 | 0.504722091 | 0.161909319 | 1.60E-03 | 2.34E-02 |
| TSS200 | PLCB1    | 20 | 10156<br>8113191                                                    | 1 | /cg22436123<br>cg27591117                                                        | 0.198205965 | 0.268068172 | 0.419899173 | 0.151831001 | 2.17E-03 | 2.69E-02 |
| TSS200 | PTF1A    | 10 | 23481421/2348138<br>9/23481385                                      | 3 | cg17076890/cg18920<br>423/cg20014049                                             | 0.270220597 | 0.266804783 | 0.422044574 | 0.155239791 | 6.84E-04 | 1.54E-02 |
| TSS200 | PTPRT    | 20 | 41818756/4181857<br>4                                               | 2 | cg08413157/cg27625<br>055                                                        | 0.126841351 | 0.20140185  | 0.363025578 | 0.161623728 | 4.04E-04 | 1.30E-02 |
| TSS200 | RALYL    | 8  | 85095275/8509705<br>6/85095498/85095<br>394/85097031/850            | 6 | cg00266009/cg04842<br>146/cg05716166/cg1<br>6020747/cg21671806                   | 0.300238937 | 0.341182228 | 0.527346692 | 0.186164464 | 1.77E-04 | 1.06E-02 |
| TSS200 | RASGRF1  | 15 | 97049<br>79383413/7938338                                           | 2 | /cg23649708<br>cg15156078/cg19431<br>448                                         | 0.196443749 | 0.311090539 | 0.479263118 | 0.168172579 | 2.51E-04 | 1.12E-02 |
| TSS200 | RNF165   | 18 | 43914047<br>983104/983002/98                                        | 1 | cg09730015                                                                       | 0.19832376  | 0.236244739 | 0.403254159 | 0.16700942  | 6.89E-04 | 1.54E-02 |
| TSS200 | RSPO4    | 20 | 2991<br>12995292/1299530                                            | 3 | cg05336115/cg19937<br>938/cg23697417<br>cg02860732/cg03057                       | 0.219634654 | 0.173822182 | 0.329729948 | 0.155907766 | 5.21E-04 | 1.40E-02 |
| TSS200 | SHISA9   | 16 | 0/12995296<br>100911701/100911                                      | 3 | 083/cg04342955<br>cg04927931/cg08133                                             | 0.259598656 | 0.369636269 | 0.595409569 | 0.2257733   | 2.06E-03 | 2.63E-02 |
| TSS200 | SIM1     | 6  | 746/100911687/10<br>0911727/10091170                                | 6 | 486/cg11471772/cg1<br>1891393/cg21063722                                         | 0.31500923  | 0.3846802   | 0.592480535 | 0.207800335 | 2.49E-05 | 6.89E-03 |
| TSS200 | SLC18A2  | 10 | 9/100911744<br>119000638                                            | 1 | /cg22478310<br>cg15173134                                                        | 0.378897845 | 0.376248644 | 0.554818941 | 0.178570296 | 1.83E-03 | 2.49E-02 |
| TSS200 | SLC22A17 | 14 | 23821596/2382157<br>0/23822265<br>128301136/128301                  | 3 | cg15476528/cg23411<br>440/cg23464698<br>cg07421806/cg09538                       | 0.17715308  | 0.178381296 | 0.343550598 | 0.165169303 | 6.40E-04 | 1.51E-02 |
| TSS200 | SLC27A6  | 5  | 156/128301185/12<br>8301083/12830114<br>108602906/108602            | 5 | 995/cg13985726/cg1<br>4441976/cg15899948<br>cg05311412/cg11355                   | 0.229054425 | 0.288089102 | 0.458344828 | 0.170255726 | 3.57E-03 | 3.66E-02 |
| TSS200 | SLC5A7   | 2  | 860/108602931/10<br>8602937/10860297<br>11034279/1103431            | 5 | 135/cg14613271/cg1<br>8771173/cg26001902<br>cg11021744/cg15445                   | 0.412205918 | 0.439223517 | 0.638806236 | 0.19958272  | 3.99E-04 | 1.29E-02 |
| TSS200 | SLC6A1   | 3  | 1/11034345/11034<br>281                                             | 4 | 554/cg16164276/cg2<br>3405575<br>cg04210284/cg05030                              | 0.262292329 | 0.307416941 | 0.515257988 | 0.207841046 | 1.25E-03 | 2.02E-02 |
| TSS200 | SLC6A3   | 5  | 1445561/1445593/<br>1445549/1445567<br>101632341/101632             | 4 | 481/cg12882697/cg2<br>7037018<br>cg04621020/cg04633                              | 0.250250824 | 0.253240823 | 0.419007345 | 0.165766523 | 2.53E-03 | 2.94E-02 |
| TSS200 | SLCO4C1  | 5  | 286/101632321/10<br>1632372/10163232                                | 7 | 600/cg06480736/cg1<br>1009817/cg11267955                                         | 0.094948704 | 0.147271233 | 0.314547799 | 0.167276567 | 5.32E-03 | 4.66E-02 |
| TSS200 | SLIT2    | 4  | 7/101632310/1016<br>20255082/2025506<br>1/20255187                  | 3 | /cg19788741/cg2214<br>cg13078140/cg13281<br>139/cg15469350<br>cg02403292/cg14658 | 0.337305058 | 0.451698381 | 0.642086455 | 0.190388074 | 1.70E-04 | 1.06E-02 |
| TSS200 | SLIT3    | 5  | 168728193/168728<br>213/168728270/16                                | 5 | 804/cg15637465/cg1<br>5927720/cg26492514<br>cg17967577                           | 0.339987309 | 0.422433059 | 0.582153003 | 0.159719943 | 2.66E-03 | 3.02E-02 |
| TSS200 | SLITRK5  | 13 | 8728149/16872823<br>88324711                                        | 1 | 0.27742316                                                                       | 0.270804299 | 0.542421245 | 0.271616946 | 7.81E-05    | 9.06E-03 |          |

|        |          |    |                                                                              |   |                                                                                       |             |             |             |              |             |             |
|--------|----------|----|------------------------------------------------------------------------------|---|---------------------------------------------------------------------------------------|-------------|-------------|-------------|--------------|-------------|-------------|
| TSS200 | SNAP91   | 6  | 84419244/8441920<br>2/84419189/84419<br>234/84419242/844                     | 6 | cg09227138/cg17767<br>285/cg18213472/cg1<br>9671533/cg20631014                        | 0.291554167 | 0.335079723 | 0.497929821 | 0.162850099  | 0.00132989  | 0.021027561 |
| TSS200 | SORCS3   | 10 | 19237<br>106400686/106400<br>824/106400702/10                                | 4 | /cn24842733<br>cg03958798/cg08495<br>770/cg10601616/cg2                               | 0.309774398 | 0.482957725 | 0.657551995 | 0.17459427   | 1.97E-03    | 2.58E-02    |
| TSS200 | SOX21    | 13 | 6400667<br>95364514/9536456<br>9/95364586/95364                              | 4 | 0482521<br>cg01212887/cg02736<br>420/cg16201674/cg2                                   | 0.413740165 | 0.420654    | 0.611093993 | 0.190439993  | 7.51E-04    | 1.59E-02    |
| TSS200 | SPHKAP   | 2  | 510<br>229046406/229046                                                      | 2 | 3111830<br>cg06092815/cg10959                                                         | 0.426582138 | 0.506556308 | 0.66497103  | 0.158414721  | 2.88E-05    | 6.89E-03    |
| TSS200 | SPOCK3   | 4  | 515<br>168155888/168155                                                      | 2 | 353<br>cg05158197/cg22255                                                             | 0.134234852 | 0.149327418 | 0.311082549 | 0.161755131  | 2.94E-04    | 1.17E-02    |
| TSS200 | SPSB4    | 3  | 853<br>140770588/140770<br>608/140770617/14                                  | 6 | 664<br>cg04353095/cg05258<br>261/cg15562912/cg1                                       | 0.144978153 | 0.212109015 | 0.376636693 | 0.164527678  | 5.68E-03    | 4.86E-02    |
| TSS200 | SSTR2    | 17 | 0770549/14077068<br>3/140770599<br>71161157                                  | 1 | 9443257/cg20979852<br>/cn27515369<br>cg22277994                                       | 0.282628835 | 0.36149265  | 0.522970159 | 0.161477509  | 2.04E-03    | 2.63E-02    |
| TSS200 | SUNC1    | 7  | 48068758/4806872                                                             | 2 | cg03609427/cg07298                                                                    | 0.699570785 | 0.555518042 | 0.383530455 | -0.171987587 | 2.82E-06    | 4.51E-03    |
| TSS200 | SUSD5    | 3  | 8<br>33260743/3326073                                                        | 3 | 482<br>cg02239862/cg04545                                                             | 0.232784649 | 0.387156452 | 0.541407395 | 0.154250944  | 2.00E-03    | 2.60E-02    |
| TSS200 | SYT6     | 1  | 2/33260752<br>114696671/114696                                               | 2 | 136/cq13601427<br>cg01567634/cg21920                                                  | 0.229697972 | 0.279092855 | 0.456830873 | 0.177738017  | 0.000151467 | 0.010619412 |
| TSS200 | TAS1R2   | 1  | 641<br>19186245/1918626                                                      | 2 | 775<br>cg07947459/cg20678                                                             | 0.757506495 | 0.608475239 | 0.437779341 | -0.170695898 | 2.79E-05    | 0.006885757 |
| TSS200 | TBX15    | 1  | 0<br>119532189/119532                                                        | 4 | 988<br>cg05940231/cg12664                                                             | 0.366163911 | 0.455126192 | 0.618629788 | 0.163503595  | 2.26E-05    | 6.89E-03    |
| TSS200 | TCP10L   | 21 | 352/119532195/11<br>9532320<br>33957957/3395784                              | 2 | 119/cg25340966/cg2<br>6272623<br>cg08949101/cg15713                                   | 0.669835563 | 0.550494103 | 0.381136684 | -0.169357419 | 6.03E-07    | 2.66E-03    |
| TSS200 | TFPI2    | 7  | 6<br>93520183/9352007<br>4/93520175/93520                                    | 4 | 719<br>cg14377593/cg16934<br>178/cg22441533/cg2                                       | 0.108107687 | 0.218527103 | 0.371475189 | 0.152948086  | 5.46E-03    | 4.73E-02    |
| TSS200 | TLX1     | 10 | 172<br>102891045/102890<br>984/102890974/10                                  | 6 | 6739865<br>cg02567119/cg03020<br>810/cg08908184/cg1                                   | 0.180028495 | 0.168964721 | 0.331625611 | 0.162660889  | 1.00E-03    | 1.83E-02    |
| TSS200 | TLX1NB   | 10 | 2890886/10289098<br>6/102891019<br>102891076/102891                          | 7 | 119/cg03020810/cg0<br>8908184/cg18964775<br>/cn25741023/cg02567<br>cg02096397/cg02567 | 0.17461684  | 0.155415108 | 0.326264762 | 0.170849655  | 8.65E-04    | 1.71E-02    |
| TSS200 | TM6SF1   | 15 | 045/102890984/10<br>2890974/10289098<br>6/102891019/1028<br>83776271/8377626 | 2 | 100<br>cg02745211/cg05075<br>118/cg06288251/cg1                                       | 0.151241291 | 0.376860035 | 0.565246468 | 0.188386433  | 8.18E-04    | 1.65E-02    |
| TSS200 | TMEM108  | 3  | 991/132757087/13<br>2756986/13275709                                         | 6 | 7385936/cg18115215<br>/cn24198558<br>cg12122146/cg23891                               | 0.335006086 | 0.438743076 | 0.612661876 | 0.173918801  | 3.18E-04    | 1.21E-02    |
| TSS200 | TMEM132D | 12 | 0/132757102<br>130388216/130388<br>234                                       | 2 | 360<br>cg03442425/cg10451                                                             | 0.432046123 | 0.547361186 | 0.713278861 | 0.165917675  | 1.33E-04    | 1.04E-02    |
| TSS200 | TMEM132E | 17 | 32907639/3290770<br>5/32907636/32907<br>731                                  | 4 | 253/cg21745612/cg2<br>7213352                                                         | 0.330240289 | 0.433951689 | 0.587126273 | 0.153174584  | 1.86E-03    | 2.51E-02    |



|        |         |    |                                                                            |   |                                                                               |             |             |             |              |          |             |
|--------|---------|----|----------------------------------------------------------------------------|---|-------------------------------------------------------------------------------|-------------|-------------|-------------|--------------|----------|-------------|
| TSS200 | TMEM155 | 4  | 122686432/122686<br>453/122686493/12                                       | 4 | cg03227184/cg04638<br>468/cg07978472/cg0                                      | 0.299777159 | 0.451787739 | 0.640223931 | 0.188436192  | 2.38E-04 | 0.011236785 |
| TSS200 | TMEM163 | 2  | 2686456<br>135476601/135476                                                | 3 | 8553437<br>cg03556069/cg19589                                                 | 0.068451525 | 0.086850362 | 0.236914525 | 0.150064162  | 1.46E-03 | 2.21E-02    |
| TSS200 | TMEM26  | 10 | 701/135476679<br>63213391/6321338                                          | 4 | 919/cg23057992<br>cg00360414/cg06067                                          | 0.281732012 | 0.289902709 | 0.452608389 | 0.16270568   | 2.37E-04 | 1.12E-02    |
| TSS200 | TMEM90A | 14 | 5/63213396/63213                                                           | 1 | 8286501<br>cg06204735                                                         | 0.359359645 | 0.4851486   | 0.670560677 | 0.185412077  | 1.06E-03 | 1.89E-02    |
| TSS200 | TREML3  | 6  | 339<br>74892986<br>41185715                                                | 1 | cg05143424<br>cg17029062/cg19127                                              | 0.806213305 | 0.763482017 | 0.578187677 | -0.185294339 | 1.23E-04 | 9.92E-03    |
| TSS200 | TRIM71  | 3  | 32859445/3285940                                                           | 5 | 283/cg21124497/cg2                                                            | 0.177171096 | 0.312241233 | 0.489104515 | 0.176863282  | 2.38E-03 | 2.84E-02    |
| TSS200 | TRPC6   | 11 | 7/32859377/32859<br>417/32859438<br>101454733/101454                       | 6 | 1484228/cg23528400<br>cg04553838/cg07013                                      | 0.334916158 | 0.415615892 | 0.60046499  | 0.184849098  | 9.60E-05 | 9.77E-03    |
| TSS200 | TRPC7   | 5  | 683/101454765/10<br>1454823/10145467                                       | 2 | 3644960/cg23650423<br>/cg27296293<br>cg22770135/cg23409                       | 0.408309693 | 0.504725928 | 0.661992732 | 0.157266804  | 1.24E-04 | 0.009915092 |
| TSS200 | TUSC3   | 8  | 6/101454680<br>135701240/135701                                            | 1 | 403<br>cg16243756                                                             | 0.34866517  | 0.475554461 | 0.627883064 | 0.152328603  | 1.87E-03 | 2.52E-02    |
| TSS200 | TWIST1  | 7  | 15397637<br>19157296/1915730                                               | 4 | cg00240432/cg09799                                                            | 0.124634029 | 0.213812571 | 0.414031915 | 0.200219343  | 7.03E-04 | 1.54E-02    |
| TSS200 | UBQLNL  | 11 | 4/19157420/19157                                                           | 1 | 658/cg10420952/cg1                                                            | 0.76521776  | 0.69953415  | 0.536760745 | -0.162773405 | 6.19E-04 | 1.49E-02    |
| TSS200 | UNC80   | 2  | 339<br>5538030<br>210636560/210636                                         | 3 | cg04100532/cg09438<br>147/cg24938830<br>cg05157140/cg08507                    | 0.38753957  | 0.459278506 | 0.628306471 | 0.169027966  | 2.09E-03 | 2.65E-02    |
| TSS200 | UNCX    | 7  | 533/210636539<br>1272545/1272512/<br>1272559/1272515/<br>1272526/1272486   | 6 | 422/cg17294725/cg2<br>0870512/cg21158633<br>/cg21543987<br>cg02551029/cg19540 | 0.340667745 | 0.361306234 | 0.521764314 | 0.160458079  | 4.83E-04 | 1.37E-02    |
| TSS200 | VCAN    | 5  | 82767394/8276729<br>7/82767450<br>25062827/2506277                         | 3 | 689/cg21810188<br>cg01715455/cg01941                                          | 0.130012098 | 0.174571956 | 0.370658713 | 0.196086757  | 7.20E-04 | 1.55E-02    |
| TSS200 | VSX1    | 20 | 1/25062777/25062<br>860/25062823/250                                       | 6 | 895/cg02631468/cg0<br>3111498/cg15272362                                      | 0.327231481 | 0.389951827 | 0.576211427 | 0.1862596    | 4.65E-05 | 0.007874782 |
| TSS200 | VSX2    | 14 | 62819<br>74706113/7470603<br>1/74706016/74706                              | 5 | 555/cg15416329/cg2<br>1057587/cg23118730<br>cg01893212/cg02467                | 0.330851714 | 0.373553735 | 0.534947252 | 0.161393518  | 3.69E-05 | 7.18E-03    |
| TSS200 | VWC2    | 7  | 062/74706074<br>49813088/4981310<br>2/49813111/49813                       | 4 | 990/cg09493505/cg1<br>4045872<br>cg10770742/cg17362                           | 0.186555477 | 0.208329984 | 0.45091293  | 0.242582946  | 2.02E-03 | 2.62E-02    |
| TSS200 | WDR86   | 7  | 065<br>151107285/151107                                                    | 3 | 861/cg24068372<br>cg13786089/cg15823                                          | 0.258717153 | 0.351823141 | 0.541493242 | 0.189670102  | 1.66E-03 | 2.37E-02    |
| TSS200 | ZFR2    | 19 | 257/151107261<br>3869086/3869172/<br>3869174<br>58459218/5845914           | 3 | 845/cg24876786<br>cg05119514/cg12555                                          | 0.229491011 | 0.334829491 | 0.581684005 | 0.246854514  | 1.74E-04 | 1.06E-02    |
| TSS200 | ZNF256  | 19 | 2/58459139/58459<br>136/58459097/584                                       | 6 | 306/cg16246961/cg2<br>2731359/cg23484087                                      | 0.101489456 | 0.147795324 | 0.335643988 | 0.187848664  | 3.92E-04 | 1.29E-02    |
| TSS200 | ZNF264  | 19 | 59248<br>57702809/5770279<br>0/57702772/57702<br>697/57702803/577<br>02793 | 6 | 259/cg18576158/cg2<br>0715764/cg25800082<br>/cg26970847                       | 0.045250513 | 0.0991774   | 0.299380467 | 0.200203067  | 4.25E-03 | 4.05E-02    |

|        |          |    |                                                                              |   |                                                                |             |             |             |             |             |             |
|--------|----------|----|------------------------------------------------------------------------------|---|----------------------------------------------------------------|-------------|-------------|-------------|-------------|-------------|-------------|
| TSS200 | ZNF347   | 19 | 53662467/5366243<br>9/53662353<br>178368071/178368                           | 3 | cg11081729/cg23052<br>615/cg27209110<br>cg02165355/cg03234     | 0.035441866 | 0.061775464 | 0.257478493 | 0.195703029 | 2.26E-03    | 2.74E-02    |
| TSS200 | ZNF454   | 5  | 123/178368160/17<br>8368185/17836820                                         | 6 | 732/cg10575261/cg1<br>6536329/cg20778451                       | 0.412298729 | 0.466807437 | 0.627704703 | 0.160897266 | 1.79E-04    | 1.06E-02    |
| TSS200 | ZNF492   | 19 | 5/178368183<br>22816980/2281709                                              | 5 | /cg23037403<br>cg05241461/cg06748                              | 0.29730671  | 0.401194691 | 0.561396058 | 0.160201367 | 2.50E-04    | 1.12E-02    |
| TSS200 | ZNF542   | 19 | 6/22817017/22817<br>039/22816950<br>568/9662/568/943                         | 9 | 831/cg11785166/cg2<br>3217946/cg24889512<br>cg03146949/cg06942 | 0.311414553 | 0.421541164 | 0.586709571 | 0.165168407 | 1.83E-04    | 1.06E-02    |
| TSS200 | ZNF549   | 19 | 2/56879369/56879<br>554/56879559/568<br>79418/56879571/5                     | 6 | 5708153/cg18787401<br>/cg21493505/cg2630                       | 0.285128359 | 0.456519629 | 0.650572955 | 0.194053326 | 2.47E-03    | 2.89E-02    |
| TSS200 | ZNF586   | 19 | 6879613/56879645<br>58038689/5803857<br>3/58038585/58038<br>633/58038588/580 | 6 | 239/cg10729426/cg1<br>6697731/cg19060970                       | 0.138086232 | 0.14550535  | 0.337383294 | 0.191877944 | 4.92E-03    | 4.44E-02    |
| TSS200 | ZNF671   | 19 | 38621<br>58280832/5828089<br>1/58280927/58281<br>016/58281019/582            | 2 | 728/cg13636880/cg1<br>8575209/cg20751795                       | 0.220574027 | 0.315750092 | 0.473614271 | 0.15786418  | 2.37E-03    | 2.83E-02    |
| TSS200 | ZNF677   | 19 | 80994<br>58239012/5823913<br>5                                               | 4 | /cg20607331<br>cg03584535/cg07685                              | 0.141947758 | 0.240661004 | 0.43732722  | 0.196666216 | 0.003849126 | 0.038304172 |
| TSS200 | ZNF75A   | 16 | 53758289/5375829<br>7/53758233/53758<br>309                                  | 3 | 485/cg24114314/cg2<br>5404339<br>cg03004280/cg07306            | 0.240135958 | 0.370008164 | 0.553979262 | 0.183971098 | 1.13E-03    | 1.94E-02    |
| TSS200 | ZNF788   | 19 | 3355295<br>12203066/1220302<br>9                                             | 2 | 531/cg16480692<br>cg09489445/cg20773                           | 0.156508032 | 0.269657983 | 0.497029508 | 0.227371525 | 1.00E-03    | 1.83E-02    |
| TSS200 | ZNF814   | 19 | 58400494/5840057<br>4/58400559/58400<br>504                                  | 4 | 651<br>cg15746696/cg18860                                      | 0.34868974  | 0.438296465 | 0.601844211 | 0.163547746 | 6.16E-04    | 1.49E-02    |
| TSS200 | ZNF85    | 19 | 21106043/2110601<br>6/21106027/21106<br>036/21106053/211                     | 6 | 954/cg25400396/cg2<br>7112264<br>cg05310990/cg15690            | 0.283905038 | 0.392508137 | 0.572298856 | 0.179790719 | 5.85E-05    | 8.40E-03    |
| TSS200 | ZSCAN23  | 6  | 06002<br>28411279/2841142<br>3/28411287/28411<br>285/28411378/284            | 6 | 721/cg19381810/cg2<br>1448033/cg23216292                       | 0.17786891  | 0.239535867 | 0.410736147 | 0.17120028  | 2.27E-04    | 1.12E-02    |
| TSS200 | ZSWIM2   | 2  | 11309<br>187713986/187713<br>964/187713902/18<br>7714068/18771405            | 6 | 4547644/cg21486944<br>/cg24703168<br>cg05907046/cg0548         | 0.238870902 | 0.309867499 | 0.478734976 | 0.168867478 | 6.28E-04    | 1.50E-02    |
| UTR5   | ADAMTS18 | 16 | 5/187714003<br>77468893/7746885<br>0                                         | 2 | 607/cg10396546/cg1<br>4762973/cg16516691                       | 0.242036425 | 0.243960726 | 0.416279982 | 0.172319255 | 2.98E-03    | 0.029677392 |
| UTR5   | ADAMTS5  | 21 | 28338836/2833933<br>4/28339262                                               | 3 | 194<br>cg03202077/cg15237                                      | 0.33495262  | 0.433389163 | 0.603467985 | 0.170078822 | 3.21E-04    | 0.012161575 |
| UTR5   | ADARB2   | 10 | 1779432/1779667                                                              | 2 | 494/cg23986671<br>cg00467420/cg05307                           | 0.152456797 | 0.280145489 | 0.436033709 | 0.155888219 | 0.003017844 | 0.029761028 |
| UTR5   | ADCY8    | 8  | 132052779/132052<br>702                                                      | 2 | 923<br>cg03120091/cg05229                                      | 0.291294298 | 0.390955817 | 0.553517995 | 0.162562179 | 2.16E-04    | 0.010992872 |



|      |         |    |                                                                                             |    |                                                                   |             |             |             |              |             |             |
|------|---------|----|---------------------------------------------------------------------------------------------|----|-------------------------------------------------------------------|-------------|-------------|-------------|--------------|-------------|-------------|
| UTR5 | CHST2   | 3  | 142838847/142839578/142838938/142839022/14283868                                            | 5  | cg00995327/cg08774368/cg08858437/cg09638407/ca17815252            | 0.091566806 | 0.197840252 | 0.359917922 | 0.162077669  | 0.002652779 | 0.027913807 |
| UTR5 | CPA4    | 7  | 129933014                                                                                   | 1  | cg01796223                                                        | 0.58549644  | 0.538058156 | 0.374964577 | -0.163093578 | 2.33E-04    | 0.010992872 |
| UTR5 | CR1L    | 1  | 207818493                                                                                   | 1  | cg24557058                                                        | 0.25046316  | 0.380392383 | 0.543904982 | 0.163512598  | 4.13E-03    | 3.55E-02    |
| UTR5 | DNAH11  | 7  | 21582834                                                                                    | 1  | cg05285902                                                        | 0.182962681 | 0.209432983 | 0.381891586 | 0.172458603  | 0.00300383  | 0.029749981 |
| UTR5 | DOK5    | 20 | 53092474/53092334                                                                           | 2  | cg00055557/cg20107395                                             | 0.245197855 | 0.316964298 | 0.471235526 | 0.154271228  | 3.91E-03    | 3.43E-02    |
| UTR5 | DTX3    | 12 | 57998762/57998786/57998656                                                                  | 3  | cg11654179/cg17730484/ca19217692                                  | 0.092657477 | 0.100876562 | 0.279461681 | 0.178585119  | 1.96E-03    | 0.023830755 |
| UTR5 | EBF1    | 5  | 158526693/158526614/158526642                                                               | 3  | cg04217450/cg05530568/ca17009297                                  | 0.283888828 | 0.337726565 | 0.504129801 | 0.166403236  | 2.24E-03    | 2.56E-02    |
| UTR5 | EPHA10  | 1  | 38230769/38230779                                                                           | 2  | cg12128017/cg20510207                                             | 0.302970382 | 0.384643194 | 0.540645805 | 0.15600261   | 1.99E-03    | 0.023998112 |
| UTR5 | EVC     | 4  | 5713100/5712937/5713005                                                                     | 3  | cg16418810/cg17460447/ca21210758                                  | 0.246805393 | 0.344737494 | 0.514194583 | 0.169457089  | 0.000376942 | 0.012730027 |
| UTR5 | FADS2   | 11 | 61595807                                                                                    | 1  | cg25303599                                                        | 0.0880115   | 0.159008576 | 0.40492206  | 0.245913483  | 6.65E-04    | 0.014924788 |
| UTR5 | FAM123A | 13 | 25745768/25745784                                                                           | 2  | cg14880499/cg22029275                                             | 0.23601127  | 0.382200712 | 0.570263075 | 0.188062363  | 0.001209544 | 0.018724853 |
| UTR5 | FAM155A | 13 | 108519213/108518955/108519318                                                               | 3  | cg04607400/cg05383490/ca19839798                                  | 0.331693743 | 0.384843347 | 0.596236664 | 0.211393316  | 1.10E-04    | 0.009896234 |
| UTR5 | FAM159B | 5  | 63986392                                                                                    | 1  | cg10981909                                                        | 0.354039175 | 0.485957006 | 0.671355627 | 0.185398622  | 0.001920078 | 0.023577238 |
| UTR5 | FAM162B | 6  | 117086850                                                                                   | 1  | cg07641160                                                        | 0.204753153 | 0.284185165 | 0.499210776 | 0.215025611  | 1.80E-03    | 2.28E-02    |
| UTR5 | FAM43B  | 1  | 20879029/20879286/20879296                                                                  | 3  | cg03754311/cg05771261/ca20404387                                  | 0.292133723 | 0.381013617 | 0.551905216 | 0.170891599  | 6.79E-04    | 1.50E-02    |
| UTR5 | FBN2    | 5  | 127873397/127873552/127873711                                                               | 3  | cg12940822/cg17958315/ca25084878                                  | 0.205810473 | 0.311272031 | 0.51417982  | 0.202907789  | 1.75E-03    | 2.25E-02    |
| UTR5 | FBXL7   | 5  | 15500714                                                                                    | 1  | cg06577205                                                        | 0.344421575 | 0.375808717 | 0.528633736 | 0.15282502   | 3.82E-03    | 0.033764732 |
| UTR5 | FGF4    | 11 | 69590090/69590113                                                                           | 2  | cg19831575/cg23964057                                             | 0.151178155 | 0.239285329 | 0.42840766  | 0.189122331  | 0.001781228 | 0.022776365 |
| UTR5 | FGF5    | 4  | 81187798/81187906                                                                           | 2  | cg02002231/cg14197923                                             | 0.106380913 | 0.196157855 | 0.391203448 | 0.195045593  | 5.27E-03    | 0.041238007 |
| UTR5 | FLG2    | 1  | 152331529                                                                                   | 1  | cg20694572                                                        | 0.7220716   | 0.610989517 | 0.441182641 | -0.169806876 | 0.000166714 | 0.010357405 |
| UTR5 | FOLH1   | 11 | 49230168/49230036                                                                           | 2  | cg14775560/cg25346915                                             | 0.291977923 | 0.319281246 | 0.501149359 | 0.181868113  | 0.000494258 | 0.013447649 |
| UTR5 | FOXG1   | 14 | 29236323/29236476/26505442/26505506                                                         | 2  | cg10300684/cg10828337                                             | 0.355856943 | 0.45415355  | 0.627157636 | 0.173004086  | 1.06E-04    | 9.72E-03    |
| UTR5 | GAD2    | 10 | 3/26505440/26505245                                                                         | 4  | cg04599297/cg09056181/cg11328303/cg15850954                       | 0.277074423 | 0.44180043  | 0.613517622 | 0.171717191  | 6.95E-04    | 1.52E-02    |
| UTR5 | GALNT13 | 2  | 735/154728468/154729059/15472991                                                            | 11 | cg01911140/cg10000761/cg12079322/cg13101087/cg14630357            | 0.32878657  | 0.345853486 | 0.537751066 | 0.19189758   | 2.23E-05    | 0.008208786 |
| UTR5 | GALNTL6 | 4  | 7/154729995/154729622/154730326/154730157/154729190/154730762/172734776/172734843/172734718 | 3  | cg17130964/cg18118685/cg23762263/cg24412079/cg25703346/cg26660007 | 0.276865617 | 0.363287785 | 0.517858048 | 0.154570263  | 0.000294816 | 0.012031188 |

|      |        |    |                                                                                                                      |    |                                                                                                                                  |             |             |             |             |             |             |
|------|--------|----|----------------------------------------------------------------------------------------------------------------------|----|----------------------------------------------------------------------------------------------------------------------------------|-------------|-------------|-------------|-------------|-------------|-------------|
| UTR5 | GATA4  | 8  | 1156236//1156268<br>5/11565530/11565<br>277/11561724/115<br>61728/11562155/1<br>1565725/11563023                     | 10 | cg0009014//cg0300/<br>522/cg06704518/cg1<br>4487356/cg14666113<br>/cg18283386/cg2107<br>3927/cg24646414/cg                       | 0.304089279 | 0.399121798 | 0.562679571 | 0.163557773 | 4.67E-05    | 0.008208786 |
| UTR5 | GDF6   | 8  | 141565254<br>97172961<br>118032626/118032<br>355/118032033/11<br>8031864/11803289<br>2/118032872/1180                | 1  | 24728627//2521660<br>cg00421139<br>cg03503087/cg04983<br>142/cg06039355/cg0<br>6298519/cg08194313<br>/cg13346013/cg1389          | 0.25141105  | 0.384316417 | 0.55991715  | 0.175600733 | 0.003315762 | 0.031326458 |
| UTR5 | GFRA1  | 10 | 33115/118031950/<br>118032081/118032<br>879/118032330/11<br>8031870/11803294<br>8/118031632/1180<br>175750373/175750 | 17 | 0706/cg17256532/cg<br>18044663/cg1867293<br>9/cg19236679/cg194<br>85539/cg23898073/c<br>a24792682/ca250226<br>cg05424071/cg21094 | 0.212450643 | 0.305961437 | 0.49126561  | 0.185304173 | 5.37E-03    | 0.041681605 |
| UTR5 | GLRA3  | 4  | 109/175750280<br>157997526/157997                                                                                    | 3  | 669/cg27517702<br>cg08712866/cg09688                                                                                             | 0.22069827  | 0.294578594 | 0.467080559 | 0.172501965 | 0.000228494 | 0.010992872 |
| UTR5 | GLRB   | 4  | 363/157998201/15<br>7997750/15799755<br>4/157997880/1579                                                             | 8  | 546/cg10146199/cg1<br>0999932/cg11163620<br>/cg13828794/cg1626                                                                   | 0.223893995 | 0.308681188 | 0.499797991 | 0.191116803 | 0.000954663 | 0.016992183 |
| UTR5 | GPC6   | 13 | 93879544/9387936<br>1/93879670/93879                                                                                 | 4  | 800/cg18058689/cg1<br>9824907<br>cg03345037/cg07586                                                                              | 0.36752897  | 0.43732878  | 0.647716442 | 0.210387663 | 7.79E-05    | 0.009151315 |
| UTR5 | GPR83  | 11 | 94134446/9413458<br>0                                                                                                | 2  | cg03345037/cg07586<br>272                                                                                                        | 0.23907202  | 0.323759189 | 0.475437886 | 0.151678697 | 0.002275376 | 0.025897156 |
| UTR5 | GRIA1  | 5  | 152870258<br>105481306/105481                                                                                        | 1  | cg17020834<br>cg00343633/cg03226                                                                                                 | 0.227224285 | 0.232838994 | 0.383978405 | 0.15113941  | 0.000363786 | 0.012730027 |
| UTR5 | GRIA4  | 11 | 317/105480979/10<br>5481319/10548132<br>2/105481283/1054<br>81509/105481406/<br>105481283                            | 9  | 817/cg03243226/cg0<br>4747226/cg07972135<br>/cg15603568/cg1934<br>3464/cg21217024/cg<br>22550680                                 | 0.280322231 | 0.413955547 | 0.601997234 | 0.188041687 | 0.000500896 | 0.01350896  |
| UTR5 | GRM7   | 3  | 6902824/6902845/<br>6903019                                                                                          | 3  | cg17892178/cg18863<br>595/cg27199820<br>cg02401454/cg07703                                                                       | 0.435273323 | 0.5295267   | 0.687263277 | 0.157736577 | 6.38E-05    | 0.008692664 |
| UTR5 | HBQ1   | 16 | 230343/230341<br>55039232/5503925                                                                                    | 2  | 401<br>cg10725720/cg13948                                                                                                        | 0.32724683  | 0.338138094 | 0.520321184 | 0.18218309  | 0.000526728 | 0.013786045 |
| UTR5 | HCRTR2 | 6  | 9/55039382/55039<br>295                                                                                              | 4  | 987/cg17240815/cg2<br>7596495                                                                                                    | 0.282031535 | 0.328409048 | 0.488993624 | 0.160584575 | 0.000122578 | 0.010093278 |
| UTR5 | HMX2   | 10 | 124907708<br>54393966/5439397                                                                                        | 1  | cg19909787<br>cg05069426/cg12071                                                                                                 | 0.159048506 | 0.238984549 | 0.40401015  | 0.165025601 | 0.003503653 | 0.032087739 |
| UTR5 | HOXC9  | 12 | 1<br>19992024/1999216                                                                                                | 2  | 536<br>cg10741760/cg27549                                                                                                        | 0.28800951  | 0.364417672 | 0.572085011 | 0.207667339 | 0.000550065 | 0.013926752 |
| UTR5 | HTR6   | 1  | 7<br>92617429/9261756                                                                                                | 2  | 720<br>cg15364725/cg26135                                                                                                        | 0.546786515 | 0.527339867 | 0.686340005 | 0.159000138 | 0.001085237 | 0.018115128 |
| UTR5 | HTR7   | 10 | 2<br>66583029/6658304                                                                                                | 2  | 506<br>cg01263292/cg26415                                                                                                        | 0.201898507 | 0.225477729 | 0.384857195 | 0.159379466 | 0.001960765 | 0.023830755 |
| UTR5 | IRAK3  | 12 | 8                                                                                                                    | 2  | 547                                                                                                                              | 0.088190073 | 0.150723497 | 0.330097085 | 0.179373588 | 0.002578868 | 0.027628182 |

|      |           |    |                                                                             |   |                                                                                      |             |             |             |              |             |             |
|------|-----------|----|-----------------------------------------------------------------------------|---|--------------------------------------------------------------------------------------|-------------|-------------|-------------|--------------|-------------|-------------|
| UTR5 | IRF4      | 6  | 391936/392555/39<br>3110/392131/3917<br>64                                  | 5 | cg06392169/cg12612<br>118/cg12684209/cg1                                             | 0.237617969 | 0.435077595 | 0.610867689 | 0.175790094  | 0.002040948 | 0.024252879 |
| UTR5 | ITGA4     | 2  | 182322268/182322<br>058/182321855/18                                        | 5 | 2741420/cg17228900<br>cg06952671/cg10526                                             | 0.264610925 | 0.464160694 | 0.63316878  | 0.169008085  | 0.001959557 | 0.023830755 |
| UTR5 | KCNA1     | 12 | 2322279/18232178<br>5019933/5019311/<br>5019482/5019091/<br>5020169/5020202 | 6 | 1995919/cg25652029<br>cg06204922/cg09487<br>611/cg10363246/cg1<br>2908522/cg16907029 | 0.213254822 | 0.335016138 | 0.536760808 | 0.201744671  | 0.000530447 | 0.013802092 |
| UTR5 | KRT7      | 12 | 52627047                                                                    | 1 | /cg26590537<br>cg09670128                                                            | 0.37070131  | 0.531059411 | 0.734100745 | 0.203041334  | 0.000562192 | 0.014030238 |
| UTR5 | LAMA1     | 18 | 7117790                                                                     | 1 | cg18764577                                                                           | 0.33890274  | 0.440777189 | 0.599022482 | 0.158245293  | 4.05E-05    | 0.008208786 |
| UTR5 | LCE1B     | 1  | 152784914                                                                   | 1 | cg07090653                                                                           | 0.729669125 | 0.6528083   | 0.479028127 | -0.173780173 | 0.000359289 | 0.012730027 |
| UTR5 | LCE3D     | 1  | 152552494                                                                   | 1 | cg20676475                                                                           | 0.71794003  | 0.551679256 | 0.380826986 | -0.170852269 | 0.000131054 | 0.010271313 |
| UTR5 | LIN28B    | 6  | 105405068                                                                   | 1 | cg04560456                                                                           | 0.330428215 | 0.378783794 | 0.543564627 | 0.164780833  | 6.63E-04    | 1.49E-02    |
| UTR5 | LOC728392 | 17 | 5404508/5404330/<br>5404337                                                 | 3 | cg06462347/cg22298<br>430/cg27230784                                                 | 0.06618335  | 0.104406035 | 0.269477279 | 0.165071244  | 0.003555949 | 0.032357898 |
| UTR5 | LUZP2     | 11 | 24518737/2451877<br>6                                                       | 2 | cg06931933/cg09717<br>526                                                            | 0.277360133 | 0.309575603 | 0.460539434 | 0.150963831  | 1.11E-03    | 1.82E-02    |
| UTR5 | MDFI      | 6  | 41606317/4160643<br>9                                                       | 2 | cg01350077/cg27200<br>446                                                            | 0.134761777 | 0.262817074 | 0.459091135 | 0.196274061  | 4.17E-03    | 3.57E-02    |
| UTR5 | MMD2      | 7  | 4998714/4998649                                                             | 2 | cg26468007/cg27603<br>283                                                            | 0.263741423 | 0.340103578 | 0.49909633  | 0.158992752  | 9.47E-04    | 1.69E-02    |
| UTR5 | MRGPRX3   | 11 | 18157898/1815740<br>5                                                       | 2 | cg07656579/cg10378<br>819                                                            | 0.802569685 | 0.719069706 | 0.548679564 | -0.170390142 | 1.95E-04    | 1.09E-02    |
| UTR5 | NEFL      | 8  | 24814126/2481403<br>5                                                       | 2 | cg22978087/cg24032<br>666                                                            | 0.368008958 | 0.387229822 | 0.542913533 | 0.15568371   | 3.59E-03    | 3.25E-02    |
| UTR5 | NEUROG3   | 10 | 71333037/7133280<br>4                                                       | 2 | cg03425110/cg17583<br>413                                                            | 0.225495702 | 0.331307686 | 0.573642898 | 0.242335212  | 1.53E-05    | 8.21E-03    |
| UTR5 | NGB       | 14 | 77737621/7773749<br>5                                                       | 2 | cg02181639/cg02881<br>570                                                            | 0.375804095 | 0.441153767 | 0.623488245 | 0.182334479  | 9.01E-04    | 1.66E-02    |
| UTR5 | NKX2-2    | 20 | 21494547                                                                    | 1 | cg17029168                                                                           | 0.2650935   | 0.329316172 | 0.497733132 | 0.16841696   | 2.74E-03    | 2.83E-02    |
| UTR5 | NOVA1     | 14 | 27066771                                                                    | 1 | cg15602241                                                                           | 0.21546241  | 0.203697178 | 0.385430986 | 0.181733809  | 4.06E-04    | 1.29E-02    |
| UTR5 | NPR3      | 5  | 32711881<br>34398532/3439826                                                | 1 | cg01252672<br>cg05724110/cg09793                                                     | 0.087079092 | 0.174021886 | 0.459977908 | 0.285956023  | 1.49E-04    | 1.03E-02    |
| UTR5 | OLIG2     | 21 | 3/34398849/34398<br>265                                                     | 4 | 121/cg14843922/cg2<br>2869726                                                        | 0.317999256 | 0.411034344 | 0.58256032  | 0.171525976  | 1.51E-04    | 1.03E-02    |
| UTR5 | OLIG3     | 6  | 137815333                                                                   | 1 | cg03889226                                                                           | 0.18031487  | 0.24152574  | 0.411535868 | 0.170010128  | 1.03E-03    | 1.77E-02    |
| UTR5 | PCDH17    | 13 | 58206058/5820603<br>6                                                       | 2 | cg00208153/cg14893<br>163                                                            | 0.31001712  | 0.411174189 | 0.570123352 | 0.158949163  | 1.24E-04    | 1.01E-02    |
| UTR5 | PCP4L1    | 1  | 161228674                                                                   | 1 | cg11912330                                                                           | 0.16781842  | 0.160256398 | 0.392305085 | 0.232048687  | 3.05E-04    | 1.22E-02    |
| UTR5 | PDE4A     | 19 | 10531434                                                                    | 1 | cg23103993                                                                           | 0.095087647 | 0.097623676 | 0.362455849 | 0.264832173  | 0.000155999 | 0.010302252 |
| UTR5 | PDGFD     | 11 | 104034754/104034<br>982                                                     | 2 | cg02120582/cg18403<br>606                                                            | 0.049574196 | 0.177355176 | 0.363817949 | 0.186462773  | 3.73E-03    | 3.32E-02    |
| UTR5 | PHOX2A    | 11 | 71955113/7195516<br>4                                                       | 2 | cg13103303/cg19651<br>694                                                            | 0.364023335 | 0.428198539 | 0.596162923 | 0.167964384  | 1.38E-04    | 1.03E-02    |
| UTR5 | POM121L2  | 6  | 27280010                                                                    | 1 | cg07085962                                                                           | 0.085615451 | 0.126727028 | 0.278740917 | 0.152013889  | 7.17E-03    | 4.92E-02    |
| UTR5 | PPP2R2C   | 4  | 6473964<br>94254351/9425472                                                 | 1 | cg18013519<br>cg06133145/cg10002                                                     | 0.07588347  | 0.151003771 | 0.353179632 | 0.202175862  | 1.32E-03    | 1.96E-02    |
| UTR5 | PRIMA1    | 14 | 6/94254586/94254<br>131                                                     | 4 | 178/cg20895877/cg2<br>3889730                                                        | 0.349452212 | 0.421909473 | 0.624263842 | 0.202354369  | 4.08E-06    | 8.21E-03    |

|      |                |    |                                                                       |   |                                                                              |             |             |             |              |             |             |
|------|----------------|----|-----------------------------------------------------------------------|---|------------------------------------------------------------------------------|-------------|-------------|-------------|--------------|-------------|-------------|
| UTR5 | RSPO2          | 8  | 109095568/109095<br>572/109094880/10<br>9095264/10909578              | 6 | cg00910695/cg04050<br>867/cg07390122/cg1<br>4070647/cg14733048               | 0.274606971 | 0.358213946 | 0.512446105 | 0.154232158  | 9.80E-04    | 1.72E-02    |
| UTR5 | RYR1           | 19 | 2/109095388<br>38924347/3892434                                       | 3 | /ca20061155<br>cg04571321/cg05471                                            | 0.19628607  | 0.287594851 | 0.464376086 | 0.176781235  | 5.19E-03    | 4.09E-02    |
| UTR5 | SCGB2A2        | 11 | 9/38924436<br>62037659                                                | 1 | 297/ca06740600<br>cg22862656                                                 | 0.81272038  | 0.609554289 | 0.447701014 | -0.161853275 | 4.52E-04    | 1.33E-02    |
| UTR5 | SCTR           | 2  | 120281999/120281<br>813                                               | 2 | cg07176264/cg20505<br>223                                                    | 0.287517405 | 0.314268917 | 0.480911932 | 0.166643015  | 2.82E-03    | 2.88E-02    |
| UTR5 | SDC2           | 8  | 97506180/9750625<br>1                                                 | 2 | cg14538332/cg16935<br>295                                                    | 0.12978423  | 0.237232389 | 0.44108355  | 0.203851161  | 2.42E-03    | 2.68E-02    |
| UTR5 | SHISA9         | 16 | 12995568/1299560<br>3                                                 | 2 | cg02482218/cg04106<br>647                                                    | 0.223821843 | 0.279243776 | 0.446874112 | 0.167630336  | 1.32E-03    | 1.96E-02    |
| UTR5 | SLC35F3        | 1  | 234040765/234040<br>781                                               | 2 | cg05051043/cg09424<br>759                                                    | 0.30379271  | 0.357964728 | 0.510501209 | 0.152536481  | 0.000626188 | 0.01471305  |
| UTR5 | SLIT1          | 10 | 98945465/9894566<br>4                                                 | 2 | cg02741216/cg13196<br>826                                                    | 0.077506079 | 0.132029509 | 0.305303885 | 0.173274376  | 3.08E-03    | 0.030217212 |
| UTR5 | SLIT2          | 4  | 20255264/2025534<br>3                                                 | 2 | cg03742003/cg08428<br>452                                                    | 0.257782725 | 0.366029311 | 0.529762009 | 0.163732698  | 2.64E-03    | 2.79E-02    |
| UTR5 | SLITRK5        | 13 | 88326918/8832487<br>9/88325384/88326<br>752/88326244/883              | 7 | cg04479219/cg06682<br>197/cg07710481/cg1<br>2271981/cg16821446               | 0.225055161 | 0.301587606 | 0.457285961 | 0.155698355  | 3.01E-04    | 1.21E-02    |
| UTR5 | SMOC1          | 14 | 25263/88326635<br>70346221/7034615<br>1                               | 2 | /ca19109538/ca1957<br>cg15996043/cg18493<br>027                              | 0.080132343 | 0.181771166 | 0.361537276 | 0.17976611   | 0.002662869 | 0.027972523 |
| UTR5 | SNAP91         | 6  | 84417933/8441865<br>9/84418789/84418<br>724/84418433                  | 5 | cg07335294/cg15950<br>068/cg16334314/cg2<br>1688264/ca24190603               | 0.314300099 | 0.403981004 | 0.583119889 | 0.179138885  | 2.02E-04    | 1.10E-02    |
| UTR5 | SNTG2          | 2  | 946648                                                                | 1 | cg09426834                                                                   | 0.305865165 | 0.362097389 | 0.540930227 | 0.178832838  | 1.97E-03    | 2.38E-02    |
| UTR5 | SORCS3         | 10 | 106400880                                                             | 1 | cg16787600                                                                   | 0.341068585 | 0.5001111   | 0.680446518 | 0.180335418  | 7.49E-04    | 1.56E-02    |
| UTR5 | SPAG4L         | 20 | 31592147                                                              | 1 | cg02510802                                                                   | 0.74023952  | 0.573631311 | 0.371162491 | -0.20246882  | 2.43E-05    | 8.21E-03    |
| UTR5 | SPHKAP         | 2  | 229046325<br>136834877/136834<br>294/136834863/13<br>6834492/13683445 | 1 | cg04072323<br>cg05143123/cg09054<br>633/cg12832649/cg1<br>4650610/cg18263365 | 0.285360715 | 0.389797139 | 0.577976023 | 0.188178884  | 9.10E-05    | 9.41E-03    |
| UTR5 | SPOCK1         | 5  | 77333229/7733319<br>8                                                 | 2 | cg04077662/cg06201<br>642                                                    | 0.26808874  | 0.377675175 | 0.53033383  | 0.152658655  | 3.03E-03    | 2.98E-02    |
| UTR5 | ST6GALNAC<br>5 | 1  | 22487437/2248745<br>9/22487219                                        | 3 | cg09354309/cg10333<br>808/ca24723331                                         | 0.135148496 | 0.178398841 | 0.346324339 | 0.167925498  | 3.60E-03    | 3.26E-02    |
| UTR5 | ST8SIA1        | 12 | 55019843                                                              | 1 | cg13096208                                                                   | 0.440201565 | 0.552931606 | 0.745647236 | 0.192715631  | 4.96E-05    | 8.21E-03    |
| UTR5 | ST8SIA3        | 18 | 184826953/184827<br>4827491/18482670<br>48068665                      | 1 | cg01758805/cg02071<br>076/cg02500300/cg0<br>6367693/ca11354594<br>cg23509098 | 0.222166173 | 0.24050692  | 0.39943448  | 0.15892756   | 2.62E-03    | 2.78E-02    |
| UTR5 | SUNC1          | 7  | 10887185                                                              | 1 | cg26237681                                                                   | 0.70715429  | 0.561490989 | 0.376269341 | -0.185221648 | 1.07E-05    | 8.21E-03    |
| UTR5 | SYCP2L         | 6  | 97361759/9736140<br>8                                                 | 1 | cg14221171/cg16288<br>089                                                    | 0.159986403 | 0.224231299 | 0.459437943 | 0.235206644  | 1.60E-04    | 1.04E-02    |
| UTR5 | TAC1           | 7  | 6734991/6734940<br>93520036/9352002<br>4/93520012                     | 2 | cg13337865/cg20663<br>042<br>cg14775114/cg17338<br>208/ca24531255            | 0.38903177  | 0.447987311 | 0.610351032 | 0.162363721  | 3.64E-03    | 3.27E-02    |
| UTR5 | TEKT1          | 17 |                                                                       | 2 |                                                                              | 0.189928838 | 0.21198984  | 0.389665511 | 0.177675671  | 4.80E-05    | 8.21E-03    |
| UTR5 | TFPI2          | 7  |                                                                       | 3 |                                                                              | 0.139304337 | 0.329598872 | 0.545375324 | 0.215776452  | 4.49E-04    | 1.33E-02    |





|       |           |    |                                                            |                                                                |             |             |             |              |             |             |
|-------|-----------|----|------------------------------------------------------------|----------------------------------------------------------------|-------------|-------------|-------------|--------------|-------------|-------------|
| EXON1 | ADAMTS5   | 21 | 28338836/2833785<br>7/28337869/28339 5<br>334/28339262     | cg03202077/cg08979<br>041/cg12078031/cg1                       | 0.375383208 | 0.462682385 | 0.618631833 | 0.155949448  | 4.21E-04    | 1.32E-02    |
| EXON1 | ADARB2    | 10 | 1779432/1779667 2                                          | 5237494/cg23986671<br>cg00467420/cg05307                       | 0.152456797 | 0.280145489 | 0.436033709 | 0.155888219  | 3.02E-03    | 3.36E-02    |
| EXON1 | ADHFE1    | 8  | 67344720<br>44143998/4414443 1                             | cg20912169<br>cg02126753/cg06128                               | 0.256459935 | 0.411193623 | 0.660422359 | 0.249228736  | 7.99E-05    | 8.98E-03    |
| EXON1 | AEBP1     | 7  | 4/44144360/44143 5<br>993/44144279                         | 448/cg08739576/cg1<br>4249876/cg27493928                       | 0.14101586  | 0.261169783 | 0.450443613 | 0.189273831  | 8.43E-04    | 0.017407084 |
| EXON1 | ALPL      | 1  | 21835945 1                                                 | cg05364759                                                     | 0.215893632 | 0.240307554 | 0.424732568 | 0.184425014  | 1.35E-04    | 9.68E-03    |
| EXON1 | ALX3      | 1  | 110613072 1<br>38670957/3867098                            | cg05622465<br>cg02383130/cg07926                               | 0.163861709 | 0.208511138 | 0.372320473 | 0.163809335  | 3.44E-03    | 3.64E-02    |
| EXON1 | AMPH      | 7  | 7/38670985/38671 4<br>001                                  | 691/cg10293925/cg2<br>6122980                                  | 0.220771274 | 0.30209     | 0.49313757  | 0.19104757   | 2.28E-03    | 2.87E-02    |
| EXON1 | ARMC3     | 10 | 23217017 1                                                 | cg15193782                                                     | 0.125462671 | 0.184802217 | 0.35818351  | 0.173381292  | 3.58E-03    | 3.74E-02    |
| EXON1 | ASB15     | 7  | 123249130 1<br>91182534/91182/U                            | cg02300083<br>cg01921432/cg06384                               | 0.61231217  | 0.532766017 | 0.371533668 | -0.161232348 | 4.67E-04    | 1.38E-02    |
| EXON1 | BARHL2    | 1  | 8/91182731/91182<br>288/91182215/911 8<br>82128/91182777/9 | 463/cg06959142/cg1<br>3486820/cg13975503<br>/cg15979173/cg1832 | 0.349082339 | 0.386844012 | 0.539468922 | 0.152624911  | 8.62E-04    | 1.75E-02    |
| EXON1 | BCAT1     | 12 | 1182205<br>25102274/2510207 2                              | 2560/cg26322310<br>cg04011247/cg10764                          | 0.202790783 | 0.308302367 | 0.516316832 | 0.208014465  | 3.81E-05    | 7.81E-03    |
| EXON1 | C16orf73  | 16 | 1922149/1922155 2                                          | cg05041351/cg07775<br>371                                      | 0.155952418 | 0.191239859 | 0.348454698 | 0.157214839  | 0.00030839  | 0.012062031 |
| EXON1 | C17orf104 | 17 | 42733994/4273397 2<br>6                                    | cg21095561/cg22190<br>438                                      | 0.268131321 | 0.326896583 | 0.53463631  | 0.207739728  | 0.000100187 | 0.009131312 |
| EXON1 | C1orf173  | 1  | 75139347/7513936 2<br>4                                    | cg24155871/cg27393<br>126                                      | 0.295957565 | 0.367192178 | 0.573761716 | 0.206569538  | 8.54E-04    | 1.75E-02    |
| EXON1 | C1orf70   | 1  | 1475675/1475737 2<br>16563821/1656291                      | cg16306898/cg16601<br>494<br>cg10982433/cg11880                | 0.134715278 | 0.32452273  | 0.606946738 | 0.282424008  | 1.36E-04    | 9.68E-03    |
| EXON1 | C1QL3     | 10 | 7/16563586/16562 5<br>626/16562998                         | 855/cg15345154/cg2<br>4037897/cg25104555                       | 0.106647108 | 0.180994227 | 0.363638429 | 0.182644202  | 1.09E-03    | 1.98E-02    |
| EXON1 | C2orf74   | 2  | 61372316/6137225 2<br>6                                    | cg10580144/cg18158<br>151<br>cg02692912/cg04441                | 0.310297213 | 0.508793317 | 0.667898914 | 0.159105597  | 9.44E-04    | 1.84E-02    |
| EXON1 | CACNG3    | 16 | 9/24267559/24267 5<br>526/24266905                         | 477/cg04543289/cg0<br>7514158/cg17234150                       | 0.338346394 | 0.442153518 | 0.596171655 | 0.154018137  | 5.15E-04    | 1.43E-02    |
| EXON1 | CACNG8    | 19 | 54466297/5446653 3<br>8/54466441                           | cg08653692/cg22049<br>569/cg24415208                           | 0.344097342 | 0.443230114 | 0.651466188 | 0.208236074  | 1.05E-04    | 9.15E-03    |
| EXON1 | CBLN2     | 18 | 70211515 1                                                 | cg21902544                                                     | 0.273541708 | 0.40733855  | 0.624527209 | 0.217188659  | 8.10E-04    | 1.73E-02    |
| EXON1 | CBLN4     | 20 | 54579084/5457935 3<br>5/54579814                           | cg01729827/cg02501<br>779/cg14184078                           | 0.484643977 | 0.508003546 | 0.681354433 | 0.173350887  | 5.46E-06    | 7.59E-03    |
| EXON1 | CCDC140   | 2  | 223162881/223163 3<br>033/223162875                        | cg06916239/cg23546<br>474/cg25596297                           | 0.422570955 | 0.382108772 | 0.580172291 | 0.198063519  | 1.41E-03    | 2.22E-02    |
| EXON1 | CCDC37    | 3  | 126113784 1<br>208084456/208084                            | cg00891278<br>cg04292718/cg16115                               | 0.319879045 | 0.361500828 | 0.544311159 | 0.182810331  | 3.12E-04    | 1.21E-02    |
| EXON1 | CD34      | 1  | 415/208084640/20 4<br>8084436                              | 720/cg19591881/cg2<br>1455438                                  | 0.238943501 | 0.37336436  | 0.543432812 | 0.170068452  | 2.54E-03    | 3.05E-02    |
| EXON1 | CDH18     | 5  | 19988200/1998828 2<br>8                                    | cg06076122/cg06781<br>712                                      | 0.272073128 | 0.394306767 | 0.572143656 | 0.177836889  | 1.17E-03    | 2.02E-02    |
| EXON1 | CDH2      | 18 | 25757211/2575743 3<br>8/25757202                           | cg09313439/cg12208<br>258/cg13464915                           | 0.291554003 | 0.338988742 | 0.495758347 | 0.156769605  | 2.49E-03    | 3.03E-02    |

|       |         |    |                                                         |   |                                                             |             |             |             |              |             |             |
|-------|---------|----|---------------------------------------------------------|---|-------------------------------------------------------------|-------------|-------------|-------------|--------------|-------------|-------------|
| EXON1 | CDH8    | 16 | 62070005<br>136553595/136553                            | 1 | cg09515947<br>cg00973677/cg07664                            | 0.33996726  | 0.47995985  | 0.651866577 | 0.171906727  | 0.000804513 | 0.017249427 |
| EXON1 | CHRM2   | 7  | 882/136553855/13<br>6554160/13655368                    | 8 | 198/cg08323651/cg2<br>0847733/cg22471517                    | 0.330892161 | 0.431609421 | 0.583658591 | 0.15204917   | 3.90E-05    | 7.81E-03    |
| EXON1 | CHST2   | 3  | 2/136553868/1365<br>53884/136553728<br>142838847/142838 | 4 | /cg24228819/cg2457<br>5234/cg25632105<br>cg00995327/cg08858 | 0.088903637 | 0.191432253 | 0.350789196 | 0.159356942  | 3.23E-03    | 3.52E-02    |
| EXON1 | CLIP4   | 2  | 2838682<br>29338432                                     | 1 | 437/cg09638407/cg1<br>7815252<br>cg08808128                 | 0.152998709 | 0.321004766 | 0.562527791 | 0.241523025  | 1.04E-04    | 9.13E-03    |
| EXON1 | CNGA3   | 2  | 98962900/9896297                                        | 2 | cg18404308/cg19671                                          | 0.331170344 | 0.394459683 | 0.577932857 | 0.183473174  | 6.27E-05    | 8.29E-03    |
| EXON1 | COL25A1 | 4  | 4<br>110223646/110223<br>713/110223700/11               | 6 | 120<br>cg02441747/cg06468<br>908/cg10074544/cg1             | 0.256102573 | 0.356471273 | 0.53354126  | 0.177069987  | 4.49E-04    | 1.35E-02    |
| EXON1 | CPA4    | 7  | 0223795/11022342<br>9/110223598                         | 1 | 1935021/cg19039028<br>/cg25088758                           | 0.58549644  | 0.538058156 | 0.374964577 | -0.163093578 | 2.33E-04    | 1.11E-02    |
| EXON1 | CPB2    | 13 | 129933014                                               | 1 | cg01796223                                                  | 0.886822105 | 0.825670706 | 0.627236732 | -0.198433974 | 1.18E-04    | 9.37E-03    |
| EXON1 | CR1L    | 1  | 46679081                                                | 1 | cg14662172                                                  | 0.25046316  | 0.380392383 | 0.543904982 | 0.163512598  | 4.13E-03    | 4.10E-02    |
| EXON1 | CTNNA3  | 10 | 207818493                                               | 1 | cg24557058                                                  | 0.509914225 | 0.4564797   | 0.297704323 | -0.158775377 | 1.57E-04    | 1.01E-02    |
| EXON1 | DBX1    | 11 | 69455804                                                | 1 | cg19996026                                                  | 0.474141205 | 0.593457472 | 0.754344464 | 0.160886991  | 1.92E-03    | 2.63E-02    |
| EXON1 | DCLK1   | 13 | 20181725                                                | 1 | cg13445796                                                  | 0.321214625 | 0.385892277 | 0.57984025  | 0.193947973  | 3.33E-03    | 3.58E-02    |
| EXON1 | DEFB135 | 8  | 36705446                                                | 1 | cg20219457                                                  | 0.656798795 | 0.489811556 | 0.313000655 | -0.176810901 | 5.50E-05    | 0.008134271 |
| EXON1 | DNAH11  | 7  | 11839844                                                | 1 | cg22743884                                                  | 0.05285902  | 0.182962681 | 0.209432983 | 0.381891586  | 3.00E-03    | 3.35E-02    |
| EXON1 | DOK5    | 20 | 21582834<br>53092474/5309233                            | 2 | cg00055557/cg20107                                          | 0.245197855 | 0.316964298 | 0.471235526 | 0.154271228  | 0.003911039 | 0.039465394 |
| EXON1 | EBF1    | 5  | 4<br>158526693/158526                                   | 3 | 395<br>cg04217450/cg05530                                   | 0.283888828 | 0.337726565 | 0.504129801 | 0.166403236  | 2.24E-03    | 2.85E-02    |
| EXON1 | EFCAB3  | 17 | 614/158526642<br>60447682                               | 1 | 568/cq17009297<br>cg17876595                                | 0.77645862  | 0.605235417 | 0.423534982 | -0.181700435 | 0.000102023 | 0.009131312 |
| EXON1 | EPHA10  | 1  | 38230769/3823077                                        | 2 | cg12128017/cg20510                                          | 0.302970382 | 0.384643194 | 0.540645805 | 0.15600261   | 1.99E-03    | 2.67E-02    |
| EXON1 | EPHA6   | 3  | 9<br>96533699/9653352                                   | 5 | 207<br>cg05827732/cg09301                                   | 0.30481357  | 0.351154689 | 0.518230145 | 0.167075456  | 2.19E-03    | 2.81E-02    |
| EXON1 | ERBB4   | 2  | 0/96533511/96533                                        | 2 | 294/cg11410023/cg1                                          | 0.22029798  | 0.223880067 | 0.386143727 | 0.162263661  | 3.79E-04    | 1.28E-02    |
| EXON1 | EVC     | 4  | 530/96533824<br>213403212/213403                        | 3 | 5405439/ca26364205<br>cg07015629/cg19079                    | 0.246805393 | 0.344737494 | 0.514194583 | 0.169457089  | 3.77E-04    | 0.01283133  |
| EXON1 | FAM132A | 1  | 321<br>5713100/5712937/<br>5713005                      | 1 | 194<br>cg16418810/cg17460                                   | 0.244664875 | 0.288058028 | 0.459094609 | 0.171036581  | 1.46E-03    | 2.26E-02    |
| EXON1 | FAM155A | 13 | 1181956<br>10851823/108519<br>213/108518955/10          | 9 | 400/cg05383490/cg0<br>7223990/cg13398192                    | 0.354260508 | 0.408212486 | 0.565954616 | 0.15774213   | 1.21E-04    | 9.52E-03    |
| EXON1 | FAM159B | 5  | 8518179/10851815<br>2/108518445/1085                    | 1 | /cg14119999/cg1566<br>9183/cg17673237/cg                    | 0.354039175 | 0.485957006 | 0.671355627 | 0.185398622  | 1.92E-03    | 2.63E-02    |
| EXON1 | FAM162B | 6  | 18621/108518419/<br>108518210<br>63986392               | 2 | 10820708<br>cg10981909                                      | 0.232302324 | 0.278231633 | 0.45443854  | 0.176206908  | 7.37E-04    | 0.016702275 |
| EXON1 | FAM19A4 | 3  | 117086850/117086<br>601                                 | 1 | 608<br>cg23967169                                           | 0.309262405 | 0.36991745  | 0.578523827 | 0.208606377  | 4.36E-05    | 8.01E-03    |
| EXON1 | FBN2    | 5  | 68981503<br>127873283/127873                            | 5 | cg05209584/cg12940                                          | 0.26655335  | 0.371927499 | 0.558581465 | 0.186653967  | 1.35E-03    | 2.17E-02    |
| EXON1 | FBXL7   | 5  | 397/127873106/12<br>7873552/12787371                    | 1 | 822/cg17564775/cg1<br>7958315/ca25084878                    | 0.344421575 | 0.375808717 | 0.528633736 | 0.15282502   | 3.82E-03    | 3.89E-02    |
| EXON1 |         |    | 15500714                                                |   | cg06577205                                                  |             |             |             |              |             |             |

|       |         |    |                                                                                                                       |                                                                                                                               |             |             |             |             |             |             |
|-------|---------|----|-----------------------------------------------------------------------------------------------------------------------|-------------------------------------------------------------------------------------------------------------------------------|-------------|-------------|-------------|-------------|-------------|-------------|
| EXON1 | FGF12   | 3  | 192126244/192445<br>380/192126165/19<br>2126584/19212682 8<br>5/192126023/1924<br>45307/192126742<br>69590090/6959011 | cg00386551/cgU299Z<br>632/cg04003850/cg0<br>4350913/cg16209795<br>/cg18780257/cg1950<br>7527/cg21197774<br>cg19831575/cg23964 | 0.1959348   | 0.283200399 | 0.43707825  | 0.153877852 | 7.22E-04    | 1.65E-02    |
| EXON1 | FGF4    | 11 | 3<br>81187798/8118790 2                                                                                               | 057<br>cg02002231/cg14197                                                                                                     | 0.151178155 | 0.239285329 | 0.42840766  | 0.189122331 | 1.78E-03    | 2.50E-02    |
| EXON1 | FGF5    | 4  | 6<br>71017557/7101763 3                                                                                               | 923<br>cg00469856/cg16907                                                                                                     | 0.106380913 | 0.196157855 | 0.391203448 | 0.195045593 | 5.27E-03    | 4.76E-02    |
| EXON1 | FIGLA   | 2  | 7/71017541<br>85996499/8599675                                                                                        | 558/cg22650617<br>cg01711160/cg05855                                                                                          | 0.34936377  | 0.449135156 | 0.614173406 | 0.165038251 | 2.62E-04    | 1.14E-02    |
| EXON1 | FLRT2   | 14 | 1/85996495/85996 4<br>873<br>49230168/4923003 2                                                                       | 039/cg17410236/cg2<br>5120290<br>cg14775560/cg25346                                                                           | 0.387769243 | 0.505374665 | 0.658286638 | 0.152911972 | 1.61E-04    | 1.02E-02    |
| EXON1 | FOLH1   | 11 | 6<br>86544346/8654430                                                                                                 | 915<br>cg00314966/cg08157                                                                                                     | 0.291977923 | 0.319281246 | 0.501149359 | 0.181868113 | 4.94E-04    | 1.40E-02    |
| EXON1 | FOXF1   | 16 | 8/86544787/86544 5<br>339/86544658<br>26505442/2650550                                                                | 228/cg10514097/cg2<br>5971347/ca27122536<br>cg04599297/cg09056                                                                | 0.21386133  | 0.244452614 | 0.425902228 | 0.181449613 | 2.61E-05    | 7.81E-03    |
| EXON1 | GAD2    | 10 | 3/26505440/26505 4<br>245<br>154728735/154728 2                                                                       | 181/cg11328303/cg1<br>5850954<br>cg10033761/cg12079                                                                           | 0.277074423 | 0.44180043  | 0.613517622 | 0.171717191 | 6.95E-04    | 1.63E-02    |
| EXON1 | GALNT13 | 2  | 468<br>172734776/172734 3                                                                                             | 322<br>cg03413465/cg15533                                                                                                     | 0.429723645 | 0.429760575 | 0.596179464 | 0.166418889 | 5.41E-05    | 8.13E-03    |
| EXON1 | GALNTL6 | 4  | 843/172734718<br>11561724/1156172 2                                                                                   | 075/ca26588943<br>cg14666113/cg18283                                                                                          | 0.276865617 | 0.363287785 | 0.517858048 | 0.154570263 | 2.95E-04    | 1.19E-02    |
| EXON1 | GATA4   | 8  | 8<br>175750373/175750 3                                                                                               | 386<br>cg05424071/cg21094                                                                                                     | 0.206845058 | 0.371160593 | 0.619421941 | 0.248261348 | 5.14E-05    | 0.008134271 |
| EXON1 | GLRA3   | 4  | 109/175750280<br>157997363/157997 3                                                                                   | 669/ca27517702<br>cg09688546/cg11163                                                                                          | 0.22069827  | 0.294578594 | 0.467080559 | 0.172501965 | 2.28E-04    | 1.11E-02    |
| EXON1 | GLRB    | 4  | 554/157997367/15 4<br>7997360<br>93879769/9387954                                                                     | 620/cg16269431/cg2<br>2065614<br>cg07576142/cg12989                                                                           | 0.223893995 | 0.308681188 | 0.499797991 | 0.191116803 | 9.55E-04    | 1.85E-02    |
| EXON1 | GPC6    | 13 | 4/93879361/93879 5<br>670/93879303<br>52400907                                                                        | 574/cg16792800/cg1<br>8058689/ca19824907<br>cg04034767                                                                        | 0.360206601 | 0.431576618 | 0.653171036 | 0.221594418 | 1.08E-04    | 9.18E-03    |
| EXON1 | GRASP   | 12 | 105480979/105481 3                                                                                                    | cg03243226/cg09980                                                                                                            | 0.093413792 | 0.201368981 | 0.460650285 | 0.259281303 | 6.43E-04    | 1.57E-02    |
| EXON1 | GRIA4   | 11 | 802/105481509<br>6903153/6902824/                                                                                     | 522/ca19343464<br>cg02332525/cg17892                                                                                          | 0.278805595 | 0.397171828 | 0.567878198 | 0.17070637  | 0.000486595 | 0.01389208  |
| EXON1 | GRM7    | 3  | 6902845/6903327/ 5<br>6903019                                                                                         | 178/cg18863595/cg2<br>1187352/ca27199820<br>cg10042799                                                                        | 0.444673461 | 0.536179492 | 0.688703268 | 0.152523777 | 2.30E-05    | 7.81E-03    |
| EXON1 | GSC     | 14 | 95236123 1                                                                                                            | cg02401454/cg07703                                                                                                            | 0.11632951  | 0.085090548 | 0.282819955 | 0.197729407 | 1.60E-03    | 2.36E-02    |
| EXON1 | HBQ1    | 16 | 230343/230341 2<br>55039232/5503925                                                                                   | 401<br>cg10725720/cg13948                                                                                                     | 0.32724683  | 0.338138094 | 0.520321184 | 0.18218309  | 5.27E-04    | 1.44E-02    |
| EXON1 | HCRTR2  | 6  | 9/55039382/55039 4<br>295                                                                                             | 987/cg17240815/cg2<br>7596495                                                                                                 | 0.282031535 | 0.328409048 | 0.488993624 | 0.160584575 | 1.23E-04    | 9.52E-03    |
| EXON1 | HELT    | 4  | 185940173<br>54393966/5439397 1                                                                                       | cg17186107<br>cg05069426/cg12071                                                                                              | 0.251086025 | 0.284845711 | 0.490349859 | 0.205504148 | 2.90E-05    | 0.007809598 |
| EXON1 | HOXC9   | 12 | 1/54394194/54394 5<br>212/54394116                                                                                    | 536/cg12699286/cg2<br>4500832/ca25456468                                                                                      | 0.295738199 | 0.348657289 | 0.573071898 | 0.22441461  | 9.56E-05    | 9.13E-03    |

|       |           |    |                                                        |   |                                                                |             |             |             |              |             |             |
|-------|-----------|----|--------------------------------------------------------|---|----------------------------------------------------------------|-------------|-------------|-------------|--------------|-------------|-------------|
| EXON1 | HOXD10    | 2  | 176982108/176981<br>654/176982230/17                   | 4 | cg02249732/cg03918<br>304/cg10125317/cg1                       | 0.578035672 | 0.530000896 | 0.683258768 | 0.153257872  | 7.38E-05    | 8.87E-03    |
| EXON1 | HTR1E     | 6  | 6981919<br>87647154/8764739<br>9/87647147/87647        | 7 | 7489939<br>cg02928916/cg04278<br>702/cg07833420/cg0            | 0.273100513 | 0.369062302 | 0.56478146  | 0.195719158  | 3.51E-04    | 1.26E-02    |
| EXON1 | INHBB     | 2  | 376/87647129/876<br>47527/87647370<br>121104029/121104 | 2 | cg02173749/cg03699<br>182<br>cg01263292/cg10389                | 0.185696665 | 0.210141327 | 0.36664773  | 0.156506403  | 2.13E-03    | 2.76E-02    |
| EXON1 | IRAK3     | 12 | 66583029/6658320<br>3/66583048                         | 3 | 229/cg26415547<br>cg17228900                                   | 0.092280667 | 0.152925613 | 0.311538727 | 0.158613114  | 2.71E-03    | 3.16E-02    |
| EXON1 | IRF4      | 6  | 391764<br>182322268/182322                             | 1 | cg06952671/cg10526<br>659/cg20415809/cg2                       | 0.100866439 | 0.314322966 | 0.585962585 | 0.271639619  | 1.23E-03    | 2.07E-02    |
| EXON1 | ITGA4     | 2  | 058/182321855/18<br>2322279/18232250                   | 6 | 1995919/cg25024074<br>/cg25652029                              | 0.260763156 | 0.458986749 | 0.611804352 | 0.152817603  | 2.48E-03    | 3.03E-02    |
| EXON1 | JAM3      | 11 | 1/182321786<br>133938941                               | 1 | cg02174225                                                     | 0.125843112 | 0.265508881 | 0.442115258 | 0.176606377  | 4.02E-03    | 4.02E-02    |
| EXON1 | KCNA1     | 12 | 5019311/5019482/<br>5019091                            | 3 | cg09487611/cg10363<br>246/cg12908522                           | 0.126730906 | 0.241964179 | 0.476888771 | 0.234924592  | 6.61E-04    | 1.59E-02    |
| EXON1 | KCNH5     | 14 | 63511872<br>73331680/7333165                           | 1 | cg11755405<br>cg03786924/cg15717                               | 0.38196622  | 0.495121994 | 0.6589143   | 0.163792306  | 2.20E-04    | 0.011032849 |
| EXON1 | KCNQ5     | 6  | 2/73332073<br>44450234/4445035                         | 3 | 808/cg24687051<br>cg10059660/cg12300                           | 0.241818556 | 0.390541533 | 0.588875241 | 0.198333708  | 1.14E-04    | 9.26E-03    |
| EXON1 | KCTD8     | 4  | 8/44449738<br>149412290                                | 3 | 353/cg20646280<br>cg03788131                                   | 0.354856387 | 0.402319196 | 0.602880356 | 0.20056116   | 2.14E-06    | 7.59E-03    |
| EXON1 | KRBA1     | 7  | 39041266/3904119                                       | 1 | cg19114576/cg19449<br>377/cg23901700/cg2                       | 0.138089557 | 0.242209075 | 0.483524739 | 0.241315664  | 1.14E-05    | 7.59E-03    |
| EXON1 | KRT20     | 17 | 9/39041119/39041<br>110<br>52627342/5262704            | 4 | 5124433<br>cg09522147/cg09670<br>128/cg25313172                | 0.783862687 | 0.553260496 | 0.399192683 | -0.154067813 | 7.87E-04    | 1.70E-02    |
| EXON1 | KRT7      | 12 | 7/52627272<br>32119309                                 | 3 | cg23581186<br>cg07846220/cg18764                               | 0.421868168 | 0.536565783 | 0.689640498 | 0.153074714  | 2.27E-04    | 0.011056134 |
| EXON1 | KRTAP21-2 | 21 | 7117680/7117790                                        | 1 | 577<br>cg17082347<br>cg07090653/cg12449                        | 0.679008385 | 0.542251406 | 0.39001255  | -0.152238856 | 0.000459846 | 0.013609116 |
| EXON1 | LAMA1     | 18 | 68118006<br>152784914/152785                           | 2 | 852<br>cg00209038/cg13423<br>075/cg20156659                    | 0.361940153 | 0.458143292 | 0.61602922  | 0.157885929  | 8.27E-05    | 8.98E-03    |
| EXON1 | LBXCOR1   | 15 | 48982683/4898275<br>4/48982832                         | 2 | cg04560456<br>cg14991984/cg18623                               | 0.135106277 | 0.183650134 | 0.36080405  | 0.177153917  | 4.77E-03    | 0.044984516 |
| EXON1 | LCE1B     | 1  | 7<br>42077674/4207732                                  | 2 | 672<br>cg04784672/cg21547<br>690/cg26967167                    | 0.729669125 | 0.6528083   | 0.479028127 | -0.173780173 | 3.59E-04    | 0.012742728 |
| EXON1 | LHCGR     | 2  | 105405068<br>99470129/9947020                          | 3 | cg09147985/cg17579<br>667/cg17949440/cg1<br>9849428/cg22645719 | 0.419088745 | 0.4553261   | 0.617299805 | 0.161973705  | 5.52E-05    | 8.13E-03    |
| EXON1 | LIN28B    | 6  | 7<br>42077674/4207732                                  | 3 | cg04784672/cg21547<br>690/cg26967167<br>cg09147985/cg17579     | 0.330428215 | 0.378783794 | 0.543564627 | 0.164780833  | 6.63E-04    | 1.59E-02    |
| EXON1 | LPPR5     | 1  | 4/40315392/40314<br>978/40314771/403                   | 2 | 15337<br>169539775/169540<br>cg04748593/cg13793                | 0.270830868 | 0.405834217 | 0.581562782 | 0.175728565  | 3.28E-04    | 1.23E-02    |
| EXON1 | LRFN5     | 14 | 7/42077061<br>40314618/4031540                         | 3 | 580/cg18155853/cg2<br>3081534<br>cg06931933/cg09717            | 0.262014391 | 0.338581776 | 0.508601712 | 0.170019935  | 0.000395735 | 0.01283133  |
| EXON1 | LRRC4C    | 11 | 4/40315392/40314<br>978/40314771/403                   | 6 | 169539775/169540<br>cg04748593/cg13793                         | 0.428304199 | 0.444728341 | 0.643843741 | 0.1991154    | 1.25E-05    | 7.59E-03    |
| EXON1 | LRRIQ4    | 3  | 297/169540504/16<br>9540079<br>24518737/2451877        | 4 | 526<br>cg11898486/cg12072<br>164                               | 0.810342383 | 0.576680539 | 0.389583758 | -0.187096781 | 5.74E-05    | 0.008134271 |
| EXON1 | LUZP2     | 11 | 6<br>44324747/4430656                                  | 2 |                                                                | 0.277360133 | 0.309575603 | 0.460539434 | 0.150963831  | 1.11E-03    | 1.98E-02    |
| EXON1 | LYPD5     | 19 | 5                                                      | 2 |                                                                | 0.386054995 | 0.4309358   | 0.601844391 | 0.170908591  | 6.96E-04    | 1.63E-02    |

|       |          |    |                                                                         |   |                                                                               |             |             |             |              |             |             |
|-------|----------|----|-------------------------------------------------------------------------|---|-------------------------------------------------------------------------------|-------------|-------------|-------------|--------------|-------------|-------------|
| EXON1 | MATK     | 19 | 3801548/3801727/<br>3786246                                             | 3 | cg01388796/cg09416<br>313/ca17429382                                          | 0.19456021  | 0.267437483 | 0.454817496 | 0.187380014  | 5.28E-04    | 1.44E-02    |
| EXON1 | MDFI     | 6  | 41606317                                                                | 1 | cg01350077                                                                    | 0.134761777 | 0.262817074 | 0.459091135 | 0.196274061  | 4.17E-03    | 4.12E-02    |
| EXON1 | MMD2     | 7  | 4998714/4998649                                                         | 2 | cg26468007/cg27603<br>283                                                     | 0.263741423 | 0.340103578 | 0.49909633  | 0.158992752  | 9.47E-04    | 1.84E-02    |
| EXON1 | MOXD1    | 6  | 132722421/132722<br>315                                                 | 2 | cg07570142/cg16478<br>774                                                     | 0.101546219 | 0.17423656  | 0.388545952 | 0.214309392  | 7.94E-04    | 1.71E-02    |
| EXON1 | MYH10    | 17 | 8534013                                                                 | 1 | cg06011292                                                                    | 0.035441597 | 0.044081865 | 0.240930607 | 0.196848742  | 1.19E-03    | 2.04E-02    |
| EXON1 | NCAN     | 19 | 19322818                                                                | 1 | cg08249988                                                                    | 0.38897671  | 0.513108794 | 0.684720918 | 0.171612124  | 3.10E-04    | 1.21E-02    |
| EXON1 | NEUROG3  | 10 | 71333037                                                                | 1 | cg03425110                                                                    | 0.200846189 | 0.313128656 | 0.547800477 | 0.234671822  | 5.80E-05    | 8.13E-03    |
| EXON1 | NGB      | 14 | 77737621/7773749<br>5                                                   | 2 | cg02181639/cg02881<br>570                                                     | 0.375804095 | 0.441153767 | 0.623488245 | 0.182334479  | 9.01E-04    | 0.017925869 |
| EXON1 | NKX2-2   | 20 | 21494084/2149454<br>7                                                   | 2 | cg16390060/cg17029<br>168                                                     | 0.29859384  | 0.403195008 | 0.56332042  | 0.160125412  | 1.48E-03    | 2.28E-02    |
| EXON1 | NPBWR1   | 8  | 53853444/5385266<br>1/53853112                                          | 3 | cg02640612/cg06528<br>306/cq21001487                                          | 0.391862003 | 0.454914864 | 0.620630359 | 0.165715495  | 1.33E-04    | 9.68E-03    |
| EXON1 | NPR3     | 5  | 32711881/3271223<br>7/32712623                                          | 3 | cg01252672/cg05839<br>235/ca17630392                                          | 0.316180277 | 0.398280525 | 0.576090841 | 0.177810316  | 3.30E-05    | 7.81E-03    |
| EXON1 | ODF3     | 11 | 196824                                                                  | 1 | cg04874875                                                                    | 0.80516377  | 0.767069428 | 0.603839582 | -0.163229846 | 0.000275719 | 0.011606349 |
| EXON1 | ONECUT1  | 15 | 53081526/5308124<br>8                                                   | 2 | cg14217069/cg17500<br>265                                                     | 0.36876441  | 0.425367464 | 0.599747198 | 0.174379734  | 1.75E-04    | 1.03E-02    |
| EXON1 | OPRK1    | 8  | 54164161/5416405<br>1/54164081                                          | 3 | cg07303244/cg11701<br>471/cq25990647                                          | 0.33181452  | 0.425166318 | 0.593733085 | 0.168566767  | 1.63E-03    | 2.36E-02    |
| EXON1 | OR10T2   | 1  | 158369112/158368<br>889                                                 | 2 | cg15593510/cg15852<br>352                                                     | 0.678088725 | 0.501589039 | 0.350021123 | -0.151567916 | 3.64E-05    | 7.81E-03    |
| EXON1 | OR2AK2   | 1  | 248129192                                                               | 1 | cg11977100                                                                    | 0.593765145 | 0.440189311 | 0.286650286 | -0.153539025 | 3.45E-05    | 7.81E-03    |
| EXON1 | OR51B4   | 11 | 5322976                                                                 | 1 | cg06353345                                                                    | 0.64987143  | 0.514448006 | 0.319087886 | -0.195360119 | 9.37E-07    | 0.007587652 |
| EXON1 | OR6C65   | 12 | 55794783                                                                | 1 | cg25236050                                                                    | 0.674340085 | 0.570522283 | 0.42028155  | -0.150240733 | 1.02E-03    | 1.92E-02    |
| EXON1 | PAK7     | 20 | 9819467                                                                 | 1 | cg18034428                                                                    | 0.34452928  | 0.323443256 | 0.515732564 | 0.192289308  | 0.000124667 | 0.009522661 |
| EXON1 | PARVB    | 22 | 44420316                                                                | 1 | cg20991347                                                                    | 0.128513228 | 0.199922744 | 0.374301399 | 0.174378655  | 4.54E-03    | 4.36E-02    |
| EXON1 | PCP4L1   | 1  | 161228674                                                               | 1 | cg11912330                                                                    | 0.16781842  | 0.160256398 | 0.392305085 | 0.232048687  | 3.05E-04    | 1.21E-02    |
| EXON1 | PDGFD    | 11 | 104034754/104034<br>619/104034982                                       | 3 | cg02120582/cg07748<br>540/ca18403606                                          | 0.067299898 | 0.215763276 | 0.412432378 | 0.196669102  | 4.09E-03    | 4.07E-02    |
| EXON1 | PHOX2A   | 11 | 71955113/7195498<br>2/71955164                                          | 3 | cg13103303/cg18722<br>841/ca19651694                                          | 0.354161368 | 0.423400856 | 0.581726418 | 0.158325563  | 1.48E-04    | 0.010000173 |
| EXON1 | PKIA     | 8  | 79428444/7942856<br>9/79428434                                          | 3 | cg09043127/cg12330<br>330/cq27140220                                          | 0.062668109 | 0.138695383 | 0.293404026 | 0.154708643  | 4.13E-03    | 4.10E-02    |
| EXON1 | PPAPDC1A | 10 | 122216848                                                               | 1 | cg17087331                                                                    | 0.225069555 | 0.180014741 | 0.390885319 | 0.210870578  | 2.18E-04    | 1.10E-02    |
| EXON1 | PPP2R2C  | 4  | 6473964                                                                 | 1 | cg18013519                                                                    | 0.07588347  | 0.151003771 | 0.353179632 | 0.202175862  | 1.32E-03    | 2.15E-02    |
| EXON1 | PRND     | 20 | 4702581                                                                 | 1 | cg09906458                                                                    | 0.66278959  | 0.504456711 | 0.349004655 | -0.155452057 | 3.20E-05    | 0.007809598 |
| EXON1 | PRODH2   | 19 | 36304079                                                                | 1 | cg18640606                                                                    | 0.73577225  | 0.673229444 | 0.501053945 | -0.172175499 | 2.46E-05    | 7.81E-03    |
| EXON1 | PTH2R    | 2  | 209271661/209271<br>785                                                 | 2 | cg06391199/cg24769<br>821                                                     | 0.27094058  | 0.304544699 | 0.461541468 | 0.156996769  | 5.18E-03    | 4.72E-02    |
| EXON1 | PYDC1    | 16 | 31228299/3122820<br>2/31228263                                          | 3 | cg08346922/cg10038<br>009/ca13352836                                          | 0.350772645 | 0.447509511 | 0.65483555  | 0.207326039  | 7.67E-05    | 0.008983718 |
| EXON1 | QKI      | 6  | 163836348/163836<br>245                                                 | 2 | cg06844545/cg09339<br>301                                                     | 0.174056859 | 0.207228581 | 0.360244865 | 0.153016285  | 3.89E-03    | 3.94E-02    |
| EXON1 | QRFPR    | 4  | 122302007/122301<br>724/122301573/12<br>2301996/12230181<br>6/122301740 | 6 | cg00015770/cg06991<br>300/cg10114327/cg1<br>4012124/cg16326674<br>/ca19971716 | 0.307967968 | 0.396433607 | 0.5574158   | 0.160982193  | 7.86E-04    | 1.70E-02    |

|       |                |    |                                                          |   |                                                                |             |             |             |              |             |             |
|-------|----------------|----|----------------------------------------------------------|---|----------------------------------------------------------------|-------------|-------------|-------------|--------------|-------------|-------------|
| EXON1 | RALYL          | 8  | 8509603//8509549<br>8/85097246/85097<br>157/85096015/850 | 8 | cg000340/6/cg05/16<br>166/cg17215863/cg1<br>8016194/cg22403811 | 0.368062837 | 0.414865296 | 0.604808588 | 0.189943292  | 4.99E-05    | 8.13E-03    |
| EXON1 | RORB           | 9  | 95654/85097195/8<br>5095697<br>77112326/7711289          | 2 | /cg23777958/cg2575<br>7592/cg26669044<br>cg07536920/cg14170    | 0.128788008 | 0.182273709 | 0.344570812 | 0.162297103  | 2.08E-03    | 2.74E-02    |
| EXON1 | RSPO2          | 8  | 109095568/109095<br>572/109095782<br>38924347/3892434    | 3 | 6<br>cg00910695/cg04050<br>867/cg14733048                      | 0.274932993 | 0.351034819 | 0.527101124 | 0.176066306  | 2.42E-04    | 1.12E-02    |
| EXON1 | RYR1           | 19 | 9/38924436<br>62037659                                   | 3 | cg04571321/cg05471<br>297/cg06740600                           | 0.19628607  | 0.287594851 | 0.464376086 | 0.176781235  | 0.005193298 | 0.047217962 |
| EXON1 | SCGB2A2        | 11 | 120281999/120281                                         | 1 | cg22862656<br>cg07176264/cg20505                               | 0.81272038  | 0.609554289 | 0.447701014 | -0.161853275 | 4.52E-04    | 0.013467227 |
| EXON1 | SCTR           | 2  | 813<br>97506180/9750625                                  | 2 | 223<br>cg14538332/cg16935                                      | 0.287517405 | 0.314268917 | 0.480911932 | 0.166643015  | 2.82E-03    | 3.24E-02    |
| EXON1 | SDC2           | 8  | 1<br>234040765/234040                                    | 2 | 295<br>cg05051043/cg09424                                      | 0.12978423  | 0.237232389 | 0.44108355  | 0.203851161  | 0.002418525 | 0.029707217 |
| EXON1 | SLC35F3        | 1  | 781/234040833<br>108603005/108603                        | 3 | 759/cg25437385<br>cg16232126/cg26333                           | 0.28101686  | 0.333445822 | 0.492317723 | 0.158871901  | 6.27E-04    | 1.55E-02    |
| EXON1 | SLC5A7         | 2  | 193<br>85306548/8530647                                  | 2 | 822<br>cg02492791/cg14449                                      | 0.336260815 | 0.343567149 | 0.498572323 | 0.155005173  | 1.73E-04    | 1.03E-02    |
| EXON1 | SLC6A15        | 12 | 4/85306323/85306                                         | 4 | 051/cg19952303/cg2<br>4418420                                  | 0.229127629 | 0.269826865 | 0.424654816 | 0.154827951  | 3.64E-03    | 3.77E-02    |
| EXON1 | SLC7A14        | 3  | 170303830/170303<br>721                                  | 2 | cg18774195/cg21884<br>231                                      | 0.328577135 | 0.405935067 | 0.585724873 | 0.179789806  | 2.29E-04    | 1.11E-02    |
| EXON1 | SLIT2          | 4  | 20255264/2025534                                         | 2 | cg03742003/cg08428<br>452                                      | 0.257782725 | 0.366029311 | 0.529762009 | 0.163732698  | 2.64E-03    | 3.11E-02    |
| EXON1 | SLITRK5        | 13 | 88324879<br>70346413/7034647                             | 1 | cg06682197<br>cg15239123/cg15724                               | 0.173845211 | 0.201134676 | 0.395404609 | 0.194269933  | 6.89E-05    | 8.60E-03    |
| EXON1 | SMOC1          | 14 | 7/70346221/70346                                         | 5 | 184/cg15996043/cg1<br>8493027/cg19504005                       | 0.124645166 | 0.219719925 | 0.38550761  | 0.165787685  | 3.42E-03    | 3.64E-02    |
| EXON1 | SNTG2          | 2  | 151/70346417<br>946648                                   | 1 | cg09426834<br>cg02510802                                       | 0.305865165 | 0.362097389 | 0.540930227 | 0.178832838  | 1.97E-03    | 2.66E-02    |
| EXON1 | SPAG4L         | 20 | 31592147                                                 | 1 | cg04072323<br>cg05143123                                       | 0.74023952  | 0.573631311 | 0.371162491 | -0.20246882  | 2.43E-05    | 7.81E-03    |
| EXON1 | SPHKAP         | 2  | 229046325                                                | 1 | cg04077662/cg06201<br>642                                      | 0.285360715 | 0.389797139 | 0.577976023 | 0.188178884  | 9.10E-05    | 9.13E-03    |
| EXON1 | SPOCK1         | 5  | 136834877                                                | 1 | cg09354309/cg10333<br>808/cg24723331                           | 0.139690965 | 0.215181332 | 0.399490303 | 0.184308972  | 4.40E-03    | 4.27E-02    |
| EXON1 | ST6GALNAC<br>5 | 1  | 77333229/7733319                                         | 2 | cg04017533/cg13096<br>208                                      | 0.26808874  | 0.377675175 | 0.53033383  | 0.152658655  | 3.03E-03    | 3.37E-02    |
| EXON1 | ST8SIA1        | 12 | 22487437/2248745                                         | 3 | cg19751300<br>cg01758805/cg02071                               | 0.135148496 | 0.178398841 | 0.346324339 | 0.167925498  | 3.60E-03    | 3.75E-02    |
| EXON1 | ST8SIA3        | 18 | 9/22487219<br>55020099/5501984                           | 2 | 076/cg02500300/cg0<br>6367693/cg11354594                       | 0.41537209  | 0.499723978 | 0.684239282 | 0.184515304  | 1.21E-05    | 7.59E-03    |
| EXON1 | ST8SIA5        | 18 | 44336399<br>184826953/184827                             | 1 | cg23509098<br>cg03320827/cg26237                               | 0.246936895 | 0.371629106 | 0.542666518 | 0.171037413  | 5.69E-04    | 1.47E-02    |
| EXON1 | STOX2          | 4  | 086/184827754/18                                         | 5 | 681<br>cg05368341/cg09177                                      | 0.222166173 | 0.24050692  | 0.39943448  | 0.15892756   | 0.002615538 | 0.030976679 |
| EXON1 | SUNC1          | 7  | 4827491/18482670<br>48068665                             | 1 | 131/cg19304150<br>cg16288089                                   | 0.70715429  | 0.561490989 | 0.376269341 | -0.185221648 | 1.07E-05    | 7.59E-03    |
| EXON1 | SYCP2L         | 6  | 10887367/1088718                                         | 2 | cg21156620<br>0.639956295                                      | 0.251650399 | 0.311186155 | 0.50790396  | 0.196717805  | 6.35E-05    | 8.32E-03    |
| EXON1 | SYT6           | 1  | 114696465/114696                                         | 3 |                                                                | 0.224724152 | 0.298136266 | 0.469972501 | 0.171836235  | 7.59E-04    | 0.016926036 |
| EXON1 | TAC1           | 7  | 462/114696350<br>97361408                                | 1 |                                                                | 0.38903177  | 0.447987311 | 0.610351032 | 0.162363721  | 3.64E-03    | 3.77E-02    |
| EXON1 | TAS2R8         | 12 | 10958919                                                 | 1 |                                                                | 0.639956295 | 0.561372061 | 0.399305305 | -0.162066757 | 7.09E-06    | 7.59E-03    |

|       |         |    |                                                          |   |                                                                |             |             |             |              |             |             |
|-------|---------|----|----------------------------------------------------------|---|----------------------------------------------------------------|-------------|-------------|-------------|--------------|-------------|-------------|
| EXON1 | TFPI2   | 7  | 93520036/9352002<br>4/93519924/93520                     | 4 | cg14775114/cg17338<br>208/cg23686014/cg2                       | 0.142450764 | 0.321753576 | 0.519702184 | 0.197948608  | 4.38E-04    | 1.34E-02    |
| EXON1 | TLL1    | 4  | 012<br>166794471/166794<br>895/166794971/16              | 4 | 4531255<br>cg08570521/cg09669<br>853/cg19898128/cg2            | 0.14149001  | 0.220108282 | 0.378027405 | 0.157919123  | 2.96E-03    | 3.32E-02    |
| EXON1 | TLX1    | 10 | 6794786<br>102891076/102891<br>568/102891280/10          | 4 | 4521633<br>cg02096397/cg02450<br>004/cg05329692/cg2            | 0.206961461 | 0.194047207 | 0.357389394 | 0.163342187  | 5.40E-04    | 1.45E-02    |
| EXON1 | TM6SF1  | 15 | 2891080<br>83776422/8377644<br>6/83776420                | 3 | 7272677<br>cg03063639/cg14696<br>396/cg26460092                | 0.288529638 | 0.477104186 | 0.674643993 | 0.197539807  | 1.96E-04    | 1.07E-02    |
| EXON1 | TMEM155 | 4  | 122686269/122686<br>038/122686319<br>129693613/129693    | 3 | cg05396987/cg10863<br>741/cg21077559<br>cg01009664/cg02700     | 0.25409643  | 0.370161301 | 0.524858427 | 0.154697126  | 3.75E-04    | 1.28E-02    |
| EXON1 | TRH     | 3  | 586/129693385/12<br>9693370/12969348<br>72667236/7266732 | 5 | 891/cg11940285/cg1<br>8862481/cg22512438<br>cg01030121/cg09972 | 0.30922142  | 0.419885811 | 0.616723861 | 0.196838051  | 0.00020499  | 0.011023645 |
| EXON1 | TRHDE   | 12 | 6/72666976/72667<br>150<br>101454317/101454              | 4 | 192/cg13663218/cg2<br>7579953<br>cg03411507/cg11016            | 0.312842455 | 0.397417921 | 0.574754972 | 0.177337051  | 1.82E-04    | 1.03E-02    |
| EXON1 | TRPC6   | 11 | 626<br>54926805/5492673<br>4                             | 2 | cg09474331/cg23695<br>687<br>cg17839237/cg20052                | 0.33482509  | 0.403225172 | 0.58180788  | 0.178582707  | 4.76E-06    | 7.59E-03    |
| EXON1 | TTYH1   | 19 | 19157193/1915690<br>2/19157263/19156                     | 2 | 718/cg24446548/cg2<br>6312150/ca26818735<br>cg02219607         | 0.184290943 | 0.320623184 | 0.49677406  | 0.176150876  | 2.98E-03    | 3.34E-02    |
| EXON1 | TWIST1  | 7  | 550/19156621<br>70504750                                 | 5 | cg15579817/cg21637<br>670<br>cg04525496/cg05176                | 0.110370943 | 0.198173023 | 0.364804639 | 0.166631616  | 1.72E-04    | 1.03E-02    |
| EXON1 | UGT2A2  | 4  | 1272710                                                  | 1 | 0.854529735                                                    | 0.854529735 | 0.804295483 | 0.638369209 | -0.165926274 | 0.000313542 | 0.012062031 |
| EXON1 | UNCX    | 7  | 71127779/7112789<br>2                                    | 1 | 0.266196025                                                    | 0.266196025 | 0.287000883 | 0.467925414 | 0.18092453   | 1.21E-03    | 2.05E-02    |
| EXON1 | VAX2    | 2  | 82767526/8276761<br>7                                    | 2 | cg15579817/cg21637<br>670<br>cg04525496/cg05176                | 0.197576615 | 0.19675699  | 0.417413989 | 0.220656999  | 1.94E-03    | 2.64E-02    |
| EXON1 | VCAN    | 5  | 158937610/158937<br>494                                  | 2 | cg0043788/cg14763<br>548<br>cg18206027                         | 0.132559309 | 0.18446299  | 0.343477828 | 0.159014838  | 7.84E-04    | 1.70E-02    |
| EXON1 | VIPR2   | 7  | 25062754/2506244<br>7                                    | 2 | cg03976877/cg13794<br>530<br>cg00043788/cg14763                | 0.344609673 | 0.441673113 | 0.646611789 | 0.204938676  | 3.56E-05    | 7.81E-03    |
| EXON1 | VSX1    | 20 | 49813486<br>116963259/116963                             | 2 | 0.309602228                                                    | 0.309602228 | 0.34355494  | 0.553490257 | 0.209935317  | 7.18E-05    | 8.80E-03    |
| EXON1 | VWC2    | 7  | 193                                                      | 1 | 0.182120415                                                    | 0.182120415 | 0.220693698 | 0.416763476 | 0.196069778  | 3.49E-04    | 1.26E-02    |
| EXON1 | WNT2    | 7  | 77593623<br>58095659                                     | 2 | cg07697895/cg27331<br>524<br>cg07585876                        | 0.269514918 | 0.365072882 | 0.541466436 | 0.176393554  | 4.88E-04    | 1.39E-02    |
| EXON1 | ZFHX4   | 8  | 58458917/5845897<br>9                                    | 1 | 0.209150756                                                    | 0.209150756 | 0.269712738 | 0.490332389 | 0.220619651  | 4.33E-03    | 4.20E-02    |
| EXON1 | ZIK1    | 19 | 57863057/5786271<br>3                                    | 1 | 0.375614655                                                    | 0.375614655 | 0.597706644 | 0.758164927 | 0.160458283  | 0.001386439 | 0.022127039 |
| EXON1 | ZNF256  | 19 | 22817176<br>58038856/5803874                             | 2 | cg14556070/cg20176<br>532<br>cg04685743/cg07494                | 0.177109025 | 0.217259773 | 0.435286696 | 0.218026924  | 0.001075868 | 0.019604206 |
| EXON1 | ZNF304  | 19 | 22817176<br>58038856/5803874                             | 2 | 0.084922142                                                    | 0.084922142 | 0.236218978 | 0.429114705 | 0.192895727  | 0.001614243 | 0.023593366 |
| EXON1 | ZNF492  | 19 | 58238987/5823885<br>0/58238928                           | 1 | 0.249439945                                                    | 0.249439945 | 0.350137439 | 0.5459557   | 0.195818261  | 7.81E-05    | 8.98E-03    |
| EXON1 | ZNF549  | 19 | 3355553<br>37997867                                      | 2 | cg07054095/cg13644<br>629<br>cg22956410                        | 0.160202411 | 0.300530641 | 0.464759873 | 0.164229233  | 3.46E-03    | 3.66E-02    |
| EXON1 | ZNF586  | 19 | 58281117                                                 | 1 | 0.104819689                                                    | 0.104819689 | 0.117110548 | 0.328906385 | 0.211795837  | 2.67E-03    | 3.14E-02    |
| EXON1 | ZNF660  | 3  | 44626492                                                 | 1 | 0.205992665                                                    | 0.205992665 | 0.316678834 | 0.524859862 | 0.208181028  | 1.62E-03    | 2.36E-02    |
| EXON1 | ZNF671  | 19 | 58238987/5823885<br>0/58238928                           | 3 | cg11977686/cg12074<br>025/ca19246110<br>cg05540369             | 0.284639445 | 0.427167596 | 0.614744311 | 0.187576714  | 4.39E-04    | 1.34E-02    |
| EXON1 | ZNF75A  | 16 | 3355553                                                  | 1 | 0.223151031                                                    | 0.223151031 | 0.339592739 | 0.496508255 | 0.156915516  | 1.52E-03    | 2.31E-02    |
| EXON1 | ZNF793  | 19 | 37997867                                                 | 1 | 0.098841377                                                    | 0.098841377 | 0.255724284 | 0.475644413 | 0.219920128  | 3.17E-03    | 3.47E-02    |

|          |           |    |                                                    |    |                                                         |             |             |             |              |          |          |
|----------|-----------|----|----------------------------------------------------|----|---------------------------------------------------------|-------------|-------------|-------------|--------------|----------|----------|
| EXON1    | ZNF814    | 19 | 58400325/58400275                                  | 2  | cg15759937/cg24124798                                   | 0.218604415 | 0.327995989 | 0.50742221  | 0.179426111  | 1.10E-03 | 1.98E-02 |
| EXON1    | ZSCAN23   | 6  | 28411271/28411240                                  | 2  | cg06818710/cg13525197                                   | 0.218626205 | 0.290955486 | 0.471140323 | 0.180184837  | 3.89E-04 | 1.28E-02 |
| GENEBODY | ABCD2     | 12 | 39981136/111521981/111522                          | 1  | cg13406085/cg03757805/cg04513                           | 0.717780775 | 0.565277444 | 0.388307936 | -0.176969508 | 2.17E-05 | 4.67E-03 |
| GENEBODY | C13orf29  | 13 | 314/111522651/111522222                            | 4  | 422/cg13698168/cg16032841                               | 0.564229618 | 0.5081458   | 0.358088846 | -0.150056954 | 1.10E-05 | 4.67E-03 |
| GENEBODY | C1orf158  | 1  | 12806667                                           | 1  | cg24338843                                              | 0.782470565 | 0.695402917 | 0.498194609 | -0.197208308 | 1.04E-04 | 5.69E-03 |
| GENEBODY | C21orf131 | 21 | 22175001                                           | 1  | cg09614626                                              | 0.750141095 | 0.645449372 | 0.468220914 | -0.177228459 | 1.12E-04 | 5.85E-03 |
| GENEBODY | C4orf47   | 4  | 186356202/140200520/140201                         | 1  | cg13054212/cg00208504/cg01733                           | 0.854377895 | 0.731720367 | 0.568434236 | -0.16328613  | 2.58E-05 | 4.67E-03 |
| GENEBODY | C4orf49   | 4  | 100/140200723/140201065/14020065                   | 5  | 638/cg05924540/cg07776847/ca13272465                    | 0.150081319 | 0.244701395 | 0.399377023 | 0.154675628  | 7.31E-04 | 1.11E-02 |
| GENEBODY | C5orf58   | 5  | 169663955                                          | 1  | cg17038633                                              | 0.812719335 | 0.70161615  | 0.531221877 | -0.170394273 | 4.03E-05 | 4.80E-03 |
| GENEBODY | C7orf66   | 7  | 108524200/42304966/4230192                         | 1  | cg21462681/cg06085877/cg13427                           | 0.755043265 | 0.636153822 | 0.435511264 | -0.200642559 | 2.60E-05 | 4.67E-03 |
| GENEBODY | CCK       | 3  | 1/42304070/42305063                                | 4  | 828/cg15778433/cg21327694                               | 0.186010025 | 0.240556373 | 0.392592868 | 0.152036495  | 7.84E-03 | 3.95E-02 |
| GENEBODY | CHODL     | 21 | 19617873/19618088/142840240/142839                 | 2  | cg11433319/cg17040471                                   | 0.40303238  | 0.512811294 | 0.693392332 | 0.180581037  | 2.40E-04 | 7.38E-03 |
| GENEBODY | CHST2     | 3  | 991/142839903/142840129/14283983                   | 6  | 442/cg18507129/cg22536150/cg23749856                    | 0.347364705 | 0.438624984 | 0.604279828 | 0.165654843  | 3.14E-05 | 4.67E-03 |
| GENEBODY | CLDN5     | 22 | 7/142840837/19511707/1951198                       | 3  | cg00811132/cg09092054/ca17577122                        | 0.170191199 | 0.277565413 | 0.4992414   | 0.221675987  | 7.68E-05 | 5.27E-03 |
| GENEBODY | DEFB122   | 20 | 30012193                                           | 1  | cg01349088                                              | 0.63772139  | 0.558780289 | 0.38016645  | -0.178613839 | 3.96E-04 | 8.87E-03 |
| GENEBODY | DKK4      | 8  | 42234243                                           | 1  | cg09184899                                              | 0.77903867  | 0.742232667 | 0.5192362   | -0.222996467 | 1.26E-04 | 6.19E-03 |
| GENEBODY | FAM49A    | 2  | 16767476/74963364/7496403                          | 1  | cg10090418/cg00662556/cg05896                           | 0.770699375 | 0.590443906 | 0.396925518 | -0.193518387 | 2.67E-04 | 7.73E-03 |
| GENEBODY | GALR1     | 18 | 0/74963807/154146183/154146                        | 3  | 682/ca26038190/cg00046499/cg04151                       | 0.36631598  | 0.452316078 | 0.616849118 | 0.16453304   | 8.92E-05 | 5.45E-03 |
| GENEBODY | GPR149    | 3  | 154146183/154146398/154145868/154145810            | 4  | 278/cg16619395/cg20498859                               | 0.291585609 | 0.374960358 | 0.539452854 | 0.164492496  | 1.55E-04 | 6.28E-03 |
| GENEBODY | GSC       | 14 | 95235125/95235489/95235026/95235127/95235968/952   | 8  | 7785447/cg13252307/cg18687675/cg2080                    | 0.262750923 | 0.281539885 | 0.443667865 | 0.16212798   | 4.00E-03 | 2.60E-02 |
| GENEBODY | HBBP1     | 11 | 34965/95235869/95235402/5263432/185940595/185941   | 1  | 4555/ca21063282/cg04161236/cg00075634/cg00933           | 0.6683465   | 0.518537633 | 0.364920186 | -0.153617447 | 4.39E-04 | 9.11E-03 |
| GENEBODY | HELT      | 4  | 265/185941304/185941625/185941601/185940969/1859   | 10 | 735/cg04905049/cg06274396/cg10463150/cg11497952/cg1396  | 0.229381335 | 0.271655583 | 0.434679543 | 0.16302396   | 3.47E-04 | 8.46E-03 |
| GENEBODY | HOXA2     | 7  | 40549/185941088/185940638/18594027/1407977/2714106 | 6  | 6883/cg17081772/cg18065811/cg2281889/cg00188704/cg02803 | 0.564760608 | 0.65107556  | 0.823423477 | 0.172347916  | 4.04E-04 | 8.92E-03 |
| GENEBODY | HOXD13    | 2  | 7/27140942/27141388/27141088/2714139               | 3  | 819/cg03763508/cg06786372/cg13661519                    | 0.315482725 | 0.239413681 | 0.412439295 | 0.173025614  | 2.86E-04 | 8.04E-03 |
| GENEBODY | ICOS      | 2  | 176958962/176958552/176959229/204822542            | 1  | cg09760956/cg18229422/ca24914355/cg15247069             | 0.781445035 | 0.6497174   | 0.470782023 | -0.178935377 | 3.46E-05 | 4.67E-03 |



|          |           |    |                                                          |    |                                                                                      |             |             |             |              |          |          |
|----------|-----------|----|----------------------------------------------------------|----|--------------------------------------------------------------------------------------|-------------|-------------|-------------|--------------|----------|----------|
| GENEBODY | IL2RB     | 22 | 37536156<br>5496683/5496592                              | 1  | cg22327543<br>cg01901262/cg03665                                                     | 0.6707666   | 0.570526994 | 0.402161141 | -0.168365854 | 6.59E-05 | 4.98E-03 |
| GENEBODY | IRX5      | 16 | 9/54965492/54965<br>67714/54967024/5                     | 8  | 7254066/cg09492451<br>/cg10824810/cg1637                                             | 0.397374316 | 0.46151088  | 0.631797325 | 0.170286445  | 1.62E-05 | 4.67E-03 |
| GENEBODY | KIAA0495  | 1  | 3661862                                                  | 1  | cg14912788                                                                           | 0.81316239  | 0.718901144 | 0.526893782 | -0.192007363 | 1.79E-06 | 4.48E-03 |
| GENEBODY | KRT4      | 12 | 53200975                                                 | 1  | cg21182263                                                                           | 0.71473191  | 0.686663217 | 0.534418023 | -0.152245194 | 1.06E-04 | 5.72E-03 |
| GENEBODY | LOC200726 | 2  | 207511246<br>72667235/7266531                            | 1  | cg15579926<br>cg01030121/cg01817                                                     | 0.760571855 | 0.677117689 | 0.504789355 | -0.172328334 | 5.48E-05 | 4.80E-03 |
| GENEBODY | LOC283392 | 12 | 880/72666281/726<br>66976/72665376/7<br>2665282/72665771 | 10 | 029/cg02511156/cg0<br>4775889/cg06622999<br>/cg13663218/cg1777<br>1605/cg18440199/cg | 0.2548672   | 0.328457629 | 0.493095163 | 0.164637534  | 5.96E-04 | 1.02E-02 |
| GENEBODY | LOC643719 | 19 | 35068555/3506822<br>1                                    | 2  | cg23200020/cg25418<br>852                                                            | 0.438227565 | 0.589002589 | 0.745249427 | 0.156246838  | 9.20E-04 | 1.21E-02 |
| GENEBODY | LOR       | 1  | 153234037/153234<br>342/153234268                        | 3  | cg08611411/cg11534<br>293/cg21860629                                                 | 0.090814989 | 0.186863206 | 0.375520182 | 0.188656975  | 2.15E-03 | 1.83E-02 |
| GENEBODY | LRRIQ3    | 1  | 74620779                                                 | 1  | cg14795163                                                                           | 0.6588679   | 0.5388706   | 0.372009832 | -0.166860768 | 8.03E-05 | 5.30E-03 |
| GENEBODY | LYPD4     | 19 | 42342105                                                 | 1  | cg07959016                                                                           | 0.829059155 | 0.735874372 | 0.554447673 | -0.181426699 | 1.03E-04 | 5.69E-03 |
| GENEBODY | MCOLN3    | 1  | 85510988                                                 | 1  | cg24535650                                                                           | 0.822618095 | 0.781970011 | 0.604710259 | -0.177259752 | 8.37E-05 | 5.41E-03 |
| GENEBODY | MIR129-2  | 11 | 43602965                                                 | 1  | cg03365311                                                                           | 0.2920819   | 0.386223178 | 0.586951064 | 0.200727886  | 8.93E-05 | 5.45E-03 |
| GENEBODY | MIR137    | 1  | 98511629                                                 | 1  | cg04293733                                                                           | 0.353616195 | 0.387999328 | 0.558625427 | 0.170626099  | 1.98E-03 | 1.76E-02 |
| GENEBODY | MIR34B    | 11 | 111383668<br>72755871/7275505                            | 1  | cg01192900<br>cg06269753/cg13620                                                     | 0.19902581  | 0.250600589 | 0.418149077 | 0.167548488  | 1.79E-03 | 1.66E-02 |
| GENEBODY | MSC       | 8  | 2/72755784/72755<br>568/72754953/727<br>55162            | 6  | 034/cg20079899/cg2<br>6280666/cg26799209<br>/cg26876974                              | 0.198986605 | 0.310751587 | 0.468738948 | 0.157987361  | 1.03E-03 | 1.27E-02 |
| GENEBODY | NEUROD1   | 2  | 182542864/182542<br>901/182543233                        | 3  | cg01431993/cg11528<br>849/cg16640855                                                 | 0.379430115 | 0.458889536 | 0.660677221 | 0.201787685  | 5.53E-05 | 4.80E-03 |
| GENEBODY | NEUROG3   | 10 | 71332776/7133274<br>4                                    | 2  | cg12938159/cg26333<br>837                                                            | 0.199739422 | 0.271869736 | 0.472729803 | 0.200860067  | 1.50E-05 | 4.67E-03 |
| GENEBODY | NHEDC1    | 4  | 103867628                                                | 1  | cg15623444                                                                           | 0.85882682  | 0.7135649   | 0.550782377 | -0.162782523 | 4.08E-04 | 8.92E-03 |
| GENEBODY | NINL      | 20 | 25450839/2547984<br>8/25448861                           | 3  | cg09614389/cg13486<br>641/ca26101502                                                 | 0.683284493 | 0.593167531 | 0.433255398 | -0.159912132 | 1.38E-03 | 1.44E-02 |
| GENEBODY | NKX2-2    | 20 | 21493101/2149282<br>3/21492914                           | 3  | cg01397679/cg21977<br>377/ca22474464                                                 | 0.30181082  | 0.394914831 | 0.568672383 | 0.173757552  | 4.01E-03 | 2.60E-02 |
| GENEBODY | OR1F2P    | 16 | 3266276                                                  | 1  | cg08748105                                                                           | 0.64413183  | 0.556193817 | 0.4051304   | -0.151063417 | 6.83E-04 | 1.07E-02 |
| GENEBODY | RBM46     | 4  | 155720155                                                | 1  | cg03174933                                                                           | 0.7254943   | 0.602266711 | 0.429098486 | -0.173168225 | 1.02E-04 | 5.66E-03 |
| GENEBODY | RSAD2     | 2  | 7029602<br>180017846/180017                              | 1  | cg00186143<br>cg07317366/cg13004                                                     | 0.739571515 | 0.611205006 | 0.449552891 | -0.161652115 | 1.08E-03 | 1.29E-02 |
| GENEBODY | SCGB3A1   | 5  | 349/180017623/18<br>0017689/18001820<br>1/180018102      | 6  | 587/cg16585682/cg1<br>8652367/cg19897330<br>/ca21919857                              | 0.20540903  | 0.254657704 | 0.411046131 | 0.156388428  | 1.03E-03 | 1.27E-02 |
| GENEBODY | SIRPB2    | 20 | 1471884                                                  | 1  | cg00228984                                                                           | 0.552403565 | 0.466718389 | 0.3144807   | -0.152237689 | 9.09E-05 | 5.47E-03 |
| GENEBODY | SIRPD     | 20 | 1532543<br>60977961/6097735                              | 1  | cg03726785<br>cg00157572/cg04666                                                     | 0.7268426   | 0.642669639 | 0.434093927 | -0.208575712 | 8.57E-07 | 4.48E-03 |
| GENEBODY | SIX6      | 14 | 3/60977054/60977<br>856/60976898/609<br>77300            | 6  | 975/cg07862488/cg1<br>3019491/cg14511698<br>/ca19981568                              | 0.32836159  | 0.43885034  | 0.592218193 | 0.153367853  | 3.04E-04 | 8.23E-03 |
| GENEBODY | SLC10A2   | 13 | 103702677                                                | 1  | cg08450807                                                                           | 0.682875125 | 0.540926783 | 0.3800928   | -0.160833983 | 1.16E-05 | 4.67E-03 |
| GENEBODY | SNORD116- | 15 | 25327919                                                 | 1  | cg07897695                                                                           | 0.773205945 | 0.714791161 | 0.558580695 | -0.156210466 | 2.23E-05 | 4.67E-03 |
| GENEBODY | SNORD64   | 15 | 25230295                                                 | 1  | cg18488946                                                                           | 0.6237695   | 0.556032011 | 0.405183841 | -0.15084817  | 1.40E-04 | 6.22E-03 |

|          |           |    |                                                                              |    |                                                                                      |             |             |             |              |             |             |
|----------|-----------|----|------------------------------------------------------------------------------|----|--------------------------------------------------------------------------------------|-------------|-------------|-------------|--------------|-------------|-------------|
| GENEBODY | TFPI2     | 7  | 93519473/9351922<br>0/93519401/93519<br>855/93519621/935                     | 6  | cg12973591/cg18024<br>479/cg19784477/cg2<br>0230721/cg22799321                       | 0.200434836 | 0.348556788 | 0.571395334 | 0.222838546  | 1.21E-05    | 4.67E-03    |
| GENEBODY | TMEM39A   | 3  | 19892<br>119180915                                                           | 1  | /ca23141855<br>cg08844169                                                            | 0.85753726  | 0.742626456 | 0.589412418 | -0.153214037 | 2.11E-04    | 6.90E-03    |
| GENEBODY | TRIM77    | 11 | 89448414                                                                     | 1  | cg15042801                                                                           | 0.58826783  | 0.453950444 | 0.300998227 | -0.152952217 | 7.22E-06    | 4.67E-03    |
| GENEBODY | TSGA10IP  | 11 | 65713893                                                                     | 1  | cg21800989                                                                           | 0.693673805 | 0.633508528 | 0.47251895  | -0.160989578 | 1.38E-04    | 6.22E-03    |
| GENEBODY | UGT2A1    | 4  | 70504750<br>147129278/147129<br>826/147129184/14<br>7131069/14712899         | 1  | cg02219607<br>cg00842299/cg01376<br>826/cg05095591/cg0<br>5716671/cg06306198         | 0.854529735 | 0.804295483 | 0.638369209 | -0.165926274 | 0.000313542 | 0.008229402 |
| GENEBODY | ZIC1      | 3  | 8/147131178/1471<br>30477/147131146/<br>147129778/147131<br>332/147130536/14 | 13 | /cg12204258/cg1475<br>0948/cg16209664/cg<br>17482033/cg1829743<br>7/cg19029181/cg234 | 0.336063238 | 0.401763437 | 0.563720743 | 0.161957306  | 1.58E-04    | 6.38E-03    |
| GENEBODY | ZNF254    | 19 | 24270468                                                                     | 1  | cg01000657                                                                           | 0.070355748 | 0.104261602 | 0.280390649 | 0.176129048  | 4.91E-03    | 2.93E-02    |
| GENEBODY | ZNF454    | 5  | 178371587/178381<br>935                                                      | 2  | cg05461386/cg18358<br>845                                                            | 0.720645005 | 0.645089992 | 0.495048748 | -0.150041244 | 6.94E-05    | 5.06E-03    |
| GENEBODY | ZNF518B   | 4  | 10447440<br>12203315/1220364                                                 | 1  | cg11578055<br>cg01172903/cg01404                                                     | 0.86757463  | 0.808147272 | 0.613450536 | -0.194696736 | 1.29E-03    | 0.013995358 |
| GENEBODY | ZNF788    | 19 | 4/12203198/12203<br>349/12207214                                             | 5  | 753/cg06384763/cg1<br>1767984/ca21289365                                             | 0.136134971 | 0.255735171 | 0.50351314  | 0.247777969  | 3.22E-04    | 8.23E-03    |
| GENEBODY | ZNF85     | 19 | 211066370                                                                    | 1  | cg11416076                                                                           | 0.152357116 | 0.290752656 | 0.445527541 | 0.154774885  | 6.73E-03    | 3.58E-02    |
| UTR3     | ABLIM3    | 5  | 148638033                                                                    | 1  | cg02306139                                                                           | 0.614524665 | 0.5010142   | 0.329975855 | -0.171038345 | 2.21E-06    | 2.84E-03    |
| UTR3     | ADAMTSL3  | 15 | 84706833                                                                     | 1  | cg08115297                                                                           | 0.672769115 | 0.53539575  | 0.326736905 | -0.208658845 | 1.08E-06    | 2.63E-03    |
| UTR3     | ANO5      | 11 | 22301379                                                                     | 1  | cg06703469                                                                           | 0.764614435 | 0.692608706 | 0.530419827 | -0.162188878 | 1.88E-04    | 0.008869809 |
| UTR3     | APCS      | 1  | 159558512                                                                    | 1  | cg21291134                                                                           | 0.689444045 | 0.605787644 | 0.427001636 | -0.178786008 | 1.47E-04    | 8.38E-03    |
| UTR3     | APOBEC3F  | 22 | 39440294/3944929<br>8                                                        | 2  | cg09582545/cg19333<br>614                                                            | 0.921456525 | 0.820357289 | 0.669946377 | -0.150410912 | 5.22E-04    | 1.28E-02    |
| UTR3     | BACH2     | 6  | 90639197                                                                     | 1  | cg22758471                                                                           | 0.75454658  | 0.6842184   | 0.529889818 | -0.154328582 | 1.10E-04    | 7.65E-03    |
| UTR3     | C15orf41  | 15 | 37100941                                                                     | 1  | cg26451373                                                                           | 0.673976035 | 0.626238167 | 0.467211527 | -0.159026639 | 8.43E-04    | 1.52E-02    |
| UTR3     | C17orf102 | 17 | 32904255/3290371<br>7                                                        | 2  | cg12309348/cg26090<br>020                                                            | 0.678335128 | 0.564225969 | 0.39224943  | -0.17197654  | 4.81E-07    | 1.64E-03    |
| UTR3     | C1R       | 12 | 7187715                                                                      | 1  | cg15837470                                                                           | 0.616887595 | 0.517457528 | 0.340778336 | -0.176679191 | 4.11E-06    | 2.84E-03    |
| UTR3     | C7orf16   | 7  | 31747928                                                                     | 1  | cg01227294                                                                           | 0.735600575 | 0.711654978 | 0.509239177 | -0.202415801 | 1.29E-06    | 2.63E-03    |
| UTR3     | CACNG7    | 19 | 54445888                                                                     | 1  | cg21477176                                                                           | 0.54189333  | 0.599618967 | 0.750982605 | 0.151363638  | 9.19E-05    | 7.33E-03    |
| UTR3     | CALCRL    | 2  | 188210673                                                                    | 1  | cg22374415                                                                           | 0.770731225 | 0.673276206 | 0.466355305 | -0.206920901 | 6.80E-05    | 6.42E-03    |
| UTR3     | CDH13     | 16 | 83829911                                                                     | 1  | cg05847519                                                                           | 0.672865515 | 0.479692039 | 0.321072532 | -0.158619507 | 5.37E-04    | 1.29E-02    |
| UTR3     | CLEC2A    | 12 | 10065986                                                                     | 1  | cg24640735                                                                           | 0.677238055 | 0.589198289 | 0.385397318 | -0.203800971 | 4.17E-06    | 2.84E-03    |
| UTR3     | CMTM1     | 16 | 66612955                                                                     | 1  | cg09849405                                                                           | 0.204523596 | 0.377786624 | 0.654003182 | 0.276216558  | 3.78E-04    | 1.13E-02    |
| UTR3     | CNTN5     | 11 | 100227279                                                                    | 1  | cg03587117                                                                           | 0.686754415 | 0.589920333 | 0.417679709 | -0.172240624 | 1.42E-04    | 0.008282373 |
| UTR3     | CRISPLD1  | 8  | 75946479                                                                     | 1  | cg12133103                                                                           | 0.792506815 | 0.670728394 | 0.492556241 | -0.178172154 | 9.02E-05    | 7.25E-03    |
| UTR3     | CX3CR1    | 3  | 39306129                                                                     | 1  | cg04498110                                                                           | 0.63816995  | 0.511105922 | 0.357256145 | -0.153849777 | 5.58E-05    | 6.06E-03    |
| UTR3     | DENND5B   | 12 | 31538503<br>50884242/5088332                                                 | 1  | cg00182053<br>cg21774338/cg22711                                                     | 0.852821865 | 0.746444794 | 0.583098873 | -0.163345922 | 2.91E-05    | 0.005482591 |
| UTR3     | DMRTA2    | 1  | 9/50883394                                                                   | 3  | 792/cg23097402                                                                       | 0.28725513  | 0.36524962  | 0.578860173 | 0.213610552  | 6.22E-04    | 1.35E-02    |
| UTR3     | DNTT      | 10 | 98098271                                                                     | 1  | cg13444670                                                                           | 0.713757315 | 0.649293511 | 0.483406882 | -0.165886629 | 6.19E-05    | 6.30E-03    |
| UTR3     | EBF1      | 5  | 158125970<br>119307769/119307                                                | 1  | cg16394305<br>cg13630043/cg17320                                                     | 0.65559294  | 0.535946711 | 0.382240991 | -0.15370572  | 1.30E-04    | 8.12E-03    |
| UTR3     | EMX2      | 10 | 931/119307692                                                                | 3  | 707/ca19925204                                                                       | 0.20821151  | 0.251114512 | 0.409820419 | 0.158705907  | 4.99E-04    | 1.26E-02    |
| UTR3     | EPS8L1    | 19 | 55599029                                                                     | 1  | cg10016788                                                                           | 0.384508685 | 0.510922939 | 0.666173845 | 0.155250907  | 1.20E-03    | 1.82E-02    |
| UTR3     | FAIM3     | 1  | 207077339                                                                    | 1  | cg22671342                                                                           | 0.80168361  | 0.731530422 | 0.557446668 | -0.174083754 | 1.88E-04    | 8.87E-03    |
| UTR3     | FAM13C    | 10 | 61007196                                                                     | 1  | cg07625992                                                                           | 0.770272225 | 0.789121933 | 0.617386782 | -0.171735152 | 5.43E-04    | 1.29E-02    |

|      |           |    |                                  |   |                                          |             |             |             |              |          |             |
|------|-----------|----|----------------------------------|---|------------------------------------------|-------------|-------------|-------------|--------------|----------|-------------|
| UTR3 | FAM26E    | 6  | 116839146                        | 1 | cg04312119                               | 0.6660065   | 0.562379411 | 0.406034514 | -0.156344897 | 1.32E-04 | 8.19E-03    |
| UTR3 | FEZF2     | 3  | 62355505/6235544                 | 3 | cg11178293/cg12378                       | 0.449229198 | 0.524748917 | 0.687487177 | 0.162738261  | 9.01E-06 | 3.75E-03    |
| UTR3 | FGF9      | 13 | 3/62355525<br>22277315/2227592   | 2 | 187/cg18175809<br>cg22356541/cg26585     | 0.779463995 | 0.748968917 | 0.591004314 | -0.157964603 | 2.90E-03 | 2.87E-02    |
| UTR3 | GFPT2     | 5  | 5                                | 1 | 320                                      | 0.687336895 | 0.585780728 | 0.423299977 | -0.162480751 | 5.04E-05 | 5.83E-03    |
| UTR3 | GP6       | 19 | 179728553                        | 1 | cg26918954                               | 0.780080255 | 0.607387206 | 0.41956515  | -0.187822056 | 3.94E-03 | 3.37E-02    |
| UTR3 | GRIN2D    | 19 | 55526208<br>48947560/4894763     | 5 | cg27154418<br>cg04988514/cg14594         | 0.337209907 | 0.448778694 | 0.62741754  | 0.178638846  | 1.99E-04 | 8.88E-03    |
| UTR3 | GSC       | 14 | 1/48947572/48947                 | 3 | 362/cg16875863/cg2                       | 0.226465008 | 0.258448255 | 0.462748754 | 0.204300499  | 5.22E-04 | 1.28E-02    |
| UTR3 | GSX1      | 13 | 578/48948005<br>95234822/9523465 | 1 | 2242216/ca26362197<br>cg05142765/cg13073 | 0.380350495 | 0.489700006 | 0.650913655 | 0.161213649  | 6.64E-04 | 1.38E-02    |
| UTR3 | GYPC      | 2  | 8/95234826                       | 1 | 773/ca23695707                           | 0.79602001  | 0.590340178 | 0.401720773 | -0.188619405 | 2.67E-04 | 9.71E-03    |
| UTR3 | GZMA      | 5  | 28368087                         | 1 | cg21851351                               | 0.67577133  | 0.510632344 | 0.356100214 | -0.154532131 | 6.00E-06 | 3.06E-03    |
| UTR3 | HBZ       | 16 | 127453782                        | 1 | cg11611448                               | 0.205046045 | 0.199966012 | 0.363854455 | 0.163888443  | 1.93E-03 | 0.022596059 |
| UTR3 | HOXD13    | 2  | 54406016                         | 1 | cg02279719                               | 0.45263155  | 0.387686828 | 0.583684286 | 0.195997459  | 2.64E-03 | 2.72E-02    |
| UTR3 | HS3ST3A1  | 17 | 176960255                        | 1 | cg17495130                               | 0.81198985  | 0.756759083 | 0.600862695 | -0.155896388 | 8.78E-04 | 1.56E-02    |
| UTR3 | HTN1      | 4  | 13399070                         | 1 | cg27260984                               | 0.674315945 | 0.621824361 | 0.460186018 | -0.161638343 | 1.79E-04 | 8.78E-03    |
| UTR3 | IL1RAP    | 3  | 70923371                         | 2 | cg16270018<br>cg19375583/cg20962         | 0.61749919  | 0.496025183 | 0.3456051   | -0.150420083 | 1.22E-04 | 7.82E-03    |
| UTR3 | IL22      | 12 | 190374982/190366                 | 1 | 926                                      | 0.825826325 | 0.751050461 | 0.549177714 | -0.201872747 | 4.55E-05 | 5.66E-03    |
| UTR3 | IL24      | 1  | 68642433                         | 1 | cg03694077                               | 0.80168361  | 0.731530422 | 0.557446668 | -0.174083754 | 1.88E-04 | 8.87E-03    |
| UTR3 | IRF4      | 6  | 207077339                        | 1 | cg22671342                               | 0.673091255 | 0.510591667 | 0.359100409 | -0.151491258 | 9.65E-04 | 1.63E-02    |
| UTR3 | IRX5      | 16 | 408730                           | 1 | cg16478536                               | 0.430253355 | 0.511959644 | 0.725156582 | 0.213196937  | 1.51E-04 | 8.42E-03    |
| UTR3 | KCNJ1     | 11 | 54967786                         | 1 | cg07452217                               | 0.830890615 | 0.759916289 | 0.607408118 | -0.152508171 | 6.82E-04 | 1.40E-02    |
| UTR3 | KIAA1486  | 2  | 128708512                        | 1 | cg22721851                               | 0.786968595 | 0.56651525  | 0.408501177 | -0.158014073 | 3.94E-04 | 1.14E-02    |
| UTR3 | KIDINS220 | 2  | 226518461                        | 1 | cg03731588                               | 0.81599487  | 0.672126689 | 0.497986095 | -0.174140593 | 3.12E-03 | 2.98E-02    |
| UTR3 | KIRREL2   | 19 | 8870227                          | 1 | cg26426395                               | 0.7143387   | 0.628661617 | 0.469341177 | -0.159320439 | 1.68E-04 | 8.71E-03    |
| UTR3 | LCN10     | 9  | 36357700                         | 2 | cg22467594<br>cg10434996/cg13735         | 0.67393744  | 0.549721972 | 0.399317668 | -0.150404304 | 4.88E-06 | 2.93E-03    |
| UTR3 | LHX5      | 12 | 139633680/139632                 | 2 | 839                                      | 0.33528102  | 0.364200703 | 0.51968583  | 0.155485127  | 9.94E-04 | 1.66E-02    |
| UTR3 | LOC643677 | 13 | 113900719/113900                 | 1 | 751                                      | 0.78100912  | 0.702736772 | 0.545224695 | -0.157512077 | 1.61E-03 | 2.06E-02    |
| UTR3 | LRRN2     | 1  | 103381760                        | 1 | cg09714424                               | 0.61777169  | 0.484634922 | 0.331329018 | -0.153305904 | 1.28E-05 | 3.96E-03    |
| UTR3 | LST1      | 6  | 204586547                        | 1 | cg11820840                               | 0.77500226  | 0.702124844 | 0.543219168 | -0.158905676 | 8.00E-05 | 6.98E-03    |
| UTR3 | NCKAP1L   | 12 | 31556482                         | 1 | cg25664715                               | 0.870193355 | 0.717033178 | 0.51087105  | -0.206162128 | 1.62E-04 | 8.63E-03    |
| UTR3 | NKX2-4    | 20 | 54936840                         | 2 | cg26787915<br>cg07247419/cg13880         | 0.22287616  | 0.28210296  | 0.433882499 | 0.151779539  | 5.04E-03 | 3.96E-02    |
| UTR3 | NPR3      | 5  | 21376484/2137633                 | 1 | 7                                        | 0.608480995 | 0.487308006 | 0.314877286 | -0.172430719 | 8.59E-05 | 7.07E-03    |
| UTR3 | NPS       | 10 | 7                                | 1 | cg25996586                               | 0.57320293  | 0.429348739 | 0.273219223 | -0.156129516 | 3.19E-06 | 2.84E-03    |
| UTR3 | OSBPL6    | 2  | 32786671                         | 1 | cg19321696                               | 0.747212875 | 0.665576506 | 0.515118623 | -0.150457883 | 9.17E-04 | 1.59E-02    |
| UTR3 | PATL2     | 15 | 129350922                        | 1 | cg21182526                               | 0.703710905 | 0.607091956 | 0.453196259 | -0.153895696 | 3.85E-05 | 0.005660056 |
| UTR3 | PDGFC     | 4  | 179260782                        | 1 | cg24799947                               | 0.72117245  | 0.583535839 | 0.400430395 | -0.183105443 | 4.24E-05 | 5.66E-03    |
| UTR3 | PDX1      | 13 | 157682848                        | 3 | cg15957807<br>cg00184376/cg15961         | 0.32888554  | 0.421182144 | 0.664261111 | 0.243078967  | 3.27E-05 | 5.54E-03    |
| UTR3 | PHLDA3    | 1  | 28499045/2849887                 | 3 | 8/28498956<br>201437101/201437           | 0.62117279  | 0.591942722 | 0.438409741 | -0.153532981 | 3.77E-06 | 2.84E-03    |
| UTR3 | PHYHIPL   | 10 | 298/201435275                    | 1 | 762/ca26299169<br>cg04055835/cg08639     | 0.770272225 | 0.789121933 | 0.617386782 | -0.171735152 | 5.43E-04 | 1.29E-02    |
| UTR3 | PIK3CG    | 7  | 61007196                         | 1 | cg07625992                               | 0.75614835  | 0.641287256 | 0.486666368 | -0.154620887 | 4.82E-03 | 3.85E-02    |
| UTR3 | PKHD1     | 6  | 106545895                        | 1 | cg24232378                               | 0.54562239  | 0.440443122 | 0.284132482 | -0.15631064  | 1.26E-05 | 3.96E-03    |
| UTR3 | PLA2G4C   | 19 | 51481908                         | 1 | cg01776172                               | 0.585142475 | 0.494844211 | 0.340336014 | -0.154508197 | 5.40E-04 | 1.29E-02    |
| UTR3 |           |    | 48551504                         | 1 | cg12986110                               |             |             |             |              |          |             |

|      |          |    |                                                                   |   |                                                                                |             |             |             |              |            |             |
|------|----------|----|-------------------------------------------------------------------|---|--------------------------------------------------------------------------------|-------------|-------------|-------------|--------------|------------|-------------|
| UTR3 | POU3F1   | 1  | 38509934/3851093<br>3/38510074/38510<br>522/38510383/385<br>10182 | 6 | cg05785481/cg08599<br>259/cg13149116/cg2<br>2821908/cg25488697<br>/cna25609528 | 0.200020794 | 0.318494176 | 0.469416162 | 0.150921985  | 5.73E-04   | 1.31E-02    |
| UTR3 | POU4F2   | 4  | 147562073                                                         | 1 | cg21200539                                                                     | 0.37320488  | 0.541917483 | 0.697049414 | 0.15513193   | 1.59E-03   | 2.05E-02    |
| UTR3 | PTHLH    | 12 | 28115804                                                          | 1 | cg14210985                                                                     | 0.69959215  | 0.602720411 | 0.392690036 | -0.210030375 | 3.37E-08   | 3.44E-04    |
| UTR3 | PTPLA    | 10 | 17632231                                                          | 1 | cg05341848                                                                     | 0.657783465 | 0.602039561 | 0.45174495  | -0.150294611 | 9.85E-05   | 7.45E-03    |
| UTR3 | PXDN     | 2  | 1637068                                                           | 1 | cg10888111                                                                     | 0.8753676   | 0.59430805  | 0.438202605 | -0.156105445 | 1.65E-03   | 2.08E-02    |
| UTR3 | RAB6B    | 3  | 133545640                                                         | 1 | cg26466524                                                                     | 0.728497465 | 0.640354644 | 0.484425677 | -0.155928967 | 4.13E-05   | 5.66E-03    |
| UTR3 | RASL10A  | 22 | 29709320/2970928<br>2                                             | 2 | cg12552771/cg15383<br>276                                                      | 0.341383162 | 0.280065188 | 0.436352001 | 0.156286812  | 1.58E-03   | 2.05E-02    |
| UTR3 | RBMXL2   | 11 | 7112356                                                           | 1 | cg06176750                                                                     | 0.652383075 | 0.45420675  | 0.274610925 | -0.179595825 | 3.29E-04   | 1.07E-02    |
| UTR3 | RGS5     | 1  | 163113390                                                         | 1 | cg10780638                                                                     | 0.675836345 | 0.576672406 | 0.415553482 | -0.161118924 | 7.73E-05   | 6.98E-03    |
| UTR3 | RIC3     | 11 | 8128361                                                           | 1 | cg03054541                                                                     | 0.794465585 | 0.738012383 | 0.564055195 | -0.173957188 | 5.31E-04   | 1.29E-02    |
| UTR3 | RPRML    | 17 | 45055836/4505600<br>8                                             | 2 | cg20129313/cg22674<br>412                                                      | 0.069754249 | 0.064663847 | 0.228397823 | 0.163733976  | 1.38E-03   | 1.92E-02    |
| UTR3 | RXFP2    | 13 | 32376637                                                          | 1 | cg09573371                                                                     | 0.61305552  | 0.558240289 | 0.386196736 | -0.172043553 | 1.73E-06   | 2.84E-03    |
| UTR3 | SACS     | 13 | 23904116                                                          | 1 | cg24140343                                                                     | 0.86852772  | 0.730204833 | 0.484653191 | -0.245551642 | 1.20E-05   | 3.96E-03    |
| UTR3 | SCNN1G   | 16 | 23227394                                                          | 1 | cg00452252                                                                     | 0.67246135  | 0.637818306 | 0.480935632 | -0.156882674 | 1.22E-03   | 1.82E-02    |
| UTR3 | SELV     | 19 | 40009835                                                          | 1 | cg07052524                                                                     | 0.61414098  | 0.452529678 | 0.299807617 | -0.152722061 | 4.26E-04   | 1.19E-02    |
| UTR3 | SIM1     | 6  | 100836916                                                         | 1 | cg24544512                                                                     | 0.570116665 | 0.520291622 | 0.357163086 | -0.163128536 | 9.56E-06   | 3.75E-03    |
| UTR3 | SLC14A2  | 18 | 43262611                                                          | 1 | cg15090262                                                                     | 0.728026735 | 0.643834861 | 0.466792805 | -0.177042057 | 2.29E-05   | 5.47E-03    |
| UTR3 | SNAP25   | 20 | 10286857                                                          | 1 | cg03569068                                                                     | 0.791877555 | 0.749251044 | 0.58704295  | -0.162208094 | 1.33E-03   | 1.89E-02    |
| UTR3 | SYT10    | 12 | 33528782                                                          | 1 | cg03354810                                                                     | 0.765560605 | 0.750931206 | 0.593719    | -0.157212206 | 3.32E-04   | 1.07E-02    |
| UTR3 | TCHHL1   | 1  | 152056869                                                         | 1 | cg05388137                                                                     | 0.729877155 | 0.627862744 | 0.4650036   | -0.162859144 | 1.77E-04   | 8.75E-03    |
| UTR3 | TCTEX1D1 | 1  | 67244062                                                          | 1 | cg10625686                                                                     | 0.60068317  | 0.54014705  | 0.365761418 | -0.174385632 | 4.96E-05   | 5.82E-03    |
| UTR3 | TFAP2A   | 6  | 10398601/1039849<br>4                                             | 2 | cg04389897/cg04406<br>454                                                      | 0.264736835 | 0.398388925 | 0.597863175 | 0.19947425   | 0.00139121 | 0.01921526  |
| UTR3 | TMEM155  | 4  | 122680946                                                         | 1 | cg16298202                                                                     | 0.79069576  | 0.724691622 | 0.556162114 | -0.168529509 | 9.82E-05   | 7.45E-03    |
| UTR3 | TMEM215  | 9  | 32789031                                                          | 1 | cg14279416                                                                     | 0.73243203  | 0.587047889 | 0.425299618 | -0.161748271 | 1.03E-03   | 1.68E-02    |
| UTR3 | TMEM26   | 10 | 63167726                                                          | 1 | cg18237739                                                                     | 0.69384678  | 0.580288889 | 0.424146123 | -0.156142766 | 8.37E-05   | 7.07E-03    |
| UTR3 | TRPV6    | 7  | 142569053                                                         | 1 | cg08835464                                                                     | 0.811856095 | 0.661889144 | 0.468637341 | -0.193251804 | 2.95E-05   | 5.48E-03    |
| UTR3 | VGLL2    | 6  | 117594700                                                         | 1 | cg14664726                                                                     | 0.690373685 | 0.633957139 | 0.471073259 | -0.16288388  | 2.56E-05   | 0.005472627 |
| UTR3 | ZNF304   | 19 | 57870634                                                          | 1 | cg27366815                                                                     | 0.80288294  | 0.655238128 | 0.481440823 | -0.173797305 | 3.64E-04   | 1.11E-02    |
| UTR3 | ZNF385B  | 2  | 180307728                                                         | 1 | cg17100158                                                                     | 0.765192235 | 0.710885594 | 0.552142264 | -0.158743331 | 1.88E-04   | 8.87E-03    |
| UTR3 | ZNF546   | 19 | 40522655                                                          | 1 | cg15568892                                                                     | 0.852869015 | 0.8065091   | 0.588532277 | -0.217976823 | 2.25E-06   | 2.84E-03    |
| UTR3 | ZNF549   | 19 | 58051563                                                          | 1 | cg21647626                                                                     | 0.854609165 | 0.706595533 | 0.489310455 | -0.217285079 | 7.75E-06   | 3.44E-03    |

**Table S5.** Statistics for DNA samples loading in each section of the microarray

| Sentrix_ID | Sentrix_Position | Status | Concentration<br>(ng/ul) | Volume<br>(ul) | 260/280 |
|------------|------------------|--------|--------------------------|----------------|---------|
| 3999442103 | R01C01           | LGA    | >120                     | 4              | 1.74    |
| 3999442103 | R02C01           | Normal | >120                     | 4              | 1.9     |
| 3999442103 | R03C01           | HGA    | >120                     | 4              | 1.93    |
| 3999442103 | R04C01           | LGA    | >120                     | 4              | 1.93    |
| 3999442103 | R05C01           | Normal | 108                      | 4              | 1.9     |
| 3999442103 | R06C01           | HGA    | >120                     | 4              | 2.01    |
| 3999442103 | R01C02           | LGA    | >120                     | 4              | 1.93    |
| 3999442103 | R02C02           | Normal | >120                     | 4              | 1.88    |
| 3999442103 | R03C02           | HGA    | 102                      | 4              | 2.01    |
| 3999442103 | R04C02           | HGA    | >120                     | 4              | 1.9     |
| 3999442103 | R05C02           | Normal | >120                     | 4              | 1.87    |
| 3999442103 | R06C02           | LGA    | 121                      | 4              | 1.92    |
| 3999442051 | R01C01           | Normal | 110                      | 3.7            | 1.85    |
| 3999442051 | R02C01           | LGA    | 100                      | 4              | 1.87    |
| 3999442051 | R03C01           | Normal | 150                      | 2.7            | 1.85    |
| 3999442051 | R04C01           | HGA    | 52.4                     | 7.7            | 1.86    |
| 3999442051 | R05C01           | Normal | 150                      | 2.7            | 1.88    |
| 3999442051 | R06C01           | LGA    | 120                      | 3.4            | 1.88    |
| 3999442051 | R01C02           | Normal | 130                      | 3.1            | 1.88    |
| 3999442051 | R02C02           | HGA    | 83.6                     | 4.8            | 1.88    |
| 3999442051 | R03C02           | Normal | 170                      | 2.4            | 1.88    |
| 3999442051 | R04C02           | HGA    | 76.6                     | 5.3            | 1.9     |
| 3999442051 | R05C02           | LGA    | 82.2                     | 4.9            | 1.9     |
| 3999442051 | R06C02           | Normal | 92.8                     | 4.4            | 1.88    |
| 3999442112 | R01C01           | LGA    | >120                     | 4              | 1.87    |
| 3999442112 | R02C01           | HGA    | >120                     | 4              | 1.93    |
| 3999442112 | R03C01           | Normal | >120                     | 4              | 1.89    |
| 3999442112 | R04C01           | HGA    | >120                     | 4              | 2       |
| 3999442112 | R05C01           | HGA    | 106                      | 4              | 1.9     |
| 3999442112 | R06C01           | Normal | >120                     | 4              | 1.88    |
| 3999442112 | R01C02           | HGA    | >120                     | 4              | 1.97    |
| 3999442112 | R02C02           | HGA    | >120                     | 4              | 1.94    |
| 3999442112 | R03C02           | Normal | 83.4                     | 5              | 1.88    |
| 3999442112 | R04C02           | HGA    | >120                     | 4              | 2.06    |
| 3999442112 | R05C02           | Normal | >120                     | 4              | 1.89    |
| 3999442112 | R06C02           | LGA    | >120                     | 4              | 1.89    |
| 3999442050 | R01C01           | LGA    | >120                     | 4              | 1.9     |
| 3999442050 | R02C01           | HGA    | >120                     | 4              | 2.04    |
| 3999442050 | R03C01           | Normal | 112                      | 4              | 1.87    |
| 3999442050 | R04C01           | LGA    | >120                     | 4              | 1.88    |
| 3999442050 | R05C01           | LGA    | >120                     | 4              | 1.88    |
| 3999442050 | R06C01           | Normal | >120                     | 4              | 1.88    |
| 3999442050 | R01C02           | LGA    | 99.6                     | 4              | 1.91    |
| 3999442050 | R02C02           | Normal | >120                     | 4              | 1.88    |

|            |        |        |      |   |      |
|------------|--------|--------|------|---|------|
| 3999442050 | R03C02 | Normal | >120 | 4 | 1.88 |
| 3999442050 | R04C02 | LGA    | >120 | 4 | 1.89 |
| 3999442050 | R05C02 | HGA    | >120 | 4 | 1.93 |
| 3999442050 | R06C02 | LGA    | >120 | 4 | 1.92 |
| 3999442119 | R01C01 | Normal | >120 | 4 | 1.9  |
| 3999442119 | R02C01 | Normal | >120 | 4 | 1.89 |
| 3999442119 | R03C01 | HGA    | >120 | 4 | 1.89 |
| 3999442119 | R04C01 | LGA    | >120 | 4 | 1.92 |
| 3999442119 | R05C01 | HGA    | >120 | 4 | 1.97 |
| 3999442119 | R06C01 | HGA    | >120 | 4 | 1.98 |
| 3999442119 | R01C02 | HGA    | 86.5 | 5 | 1.88 |
| 3999442119 | R02C02 | LGA    | >120 | 4 | 1.88 |
| 3999442119 | R03C02 | LGA    | >120 | 4 | 1.88 |
| 3999442119 | R04C02 | HGA    | >120 | 4 | 1.91 |
| 3999442119 | R05C02 | HGA    | >120 | 4 | 2.01 |
| 3999442119 | R06C02 | HGA    | >120 | 4 | 1.85 |

---

LGA: Low-grade adenoma HGA: High-grade adenoma. Sentrrix\_ID, the BeadChip ID provided by the manufacturer; Sentrrix\_Position, position of the sample on the BeadChip.

**Table S6.** Clinical and microarray information for each sample.

| Gender | Age | Chemo- and radio-therapies | Status | Sentrix_ID | Sentrix_Position | Diameter(cm) |
|--------|-----|----------------------------|--------|------------|------------------|--------------|
| female | 76  | Treatment naive            | LGA    | 3999442103 | R01C01           | 0.9          |
|        |     |                            | Normal | 3999442103 | R02C01           | 0.2          |
| female | 83  | Treatment naive            | HGA    | 3999442103 | R03C01           | 0.2          |
| female | 64  | Treatment naive            | LGA    | 3999442103 | R04C01           | 0.2          |
| female | 57  | Treatment naive            | Normal | 3999442103 | R05C01           | 1.5          |
| male   | 78  | Treatment naive            | HGA    | 3999442103 | R06C01           | 0.9          |
| female | 70  | Treatment naive            | LGA    | 3999442103 | R01C02           | 0.9          |
|        |     |                            | Normal | 3999442103 | R02C02           | 0.2          |
| male   | 68  | Treatment naive            | HGA    | 3999442103 | R03C02           | 0.9          |
|        |     |                            | HGA    | 3999442119 | R05C02           | 0.2          |
| male   | 77  | Treatment naive            | LGA    | 3999442051 | R05C02           | 0.2          |
|        |     |                            | Normal | 3999442051 | R06C02           | 0.2          |
| male   | 60  | Treatment naive            | LGA    | 3999442051 | R02C01           | 0.9          |
|        |     |                            | Normal | 3999442051 | R01C01           | 0.2          |
| male   | 56  | Treatment naive            | LGA    | 3999442051 | R06C01           | 0.2          |
|        |     |                            | Normal | 3999442051 | R05C01           | 0.9          |
| female | 70  | Treatment naive            | HGA    | 3999442051 | R04C01           | 1.3          |
|        |     |                            | Normal | 3999442051 | R03C01           | 0.2          |
| female | 58  | Treatment naive            | LGA    | 3999442112 | R01C01           | 0.8          |
|        |     |                            | HGA    | 3999442112 | R02C01           | 0.2          |
|        |     |                            | Normal | 3999442112 | R03C01           | 0.9          |
| male   | 59  | Treatment naive            | HGA    | 3999442112 | R04C01           | 0.8          |
| female | 32  | Treatment naive            | HGA    | 3999442112 | R05C01           | 0.8          |
|        |     |                            | Normal | 3999442112 | R06C01           | 0.9          |
| male   | 51  | Treatment naive            | HGA    | 3999442112 | R01C02           | NA           |

|        |    |                 |        |            |        |     |
|--------|----|-----------------|--------|------------|--------|-----|
|        |    |                 | HGA    | 3999442112 | R02C02 | 0.8 |
|        |    |                 | Normal | 3999442112 | R03C02 | 1.5 |
| female | 76 | Treatment naive | HGA    | 3999442112 | R04C02 | 0.2 |
|        |    |                 | Normal | 3999442112 | R05C02 | 0.9 |
| male   | 55 | Treatment naive | LGA    | 3999442050 | R01C01 | 1   |
|        |    |                 | LGA    | 3999442112 | R06C02 | 0.2 |
| female | 53 | Treatment naive | HGA    | 3999442050 | R02C01 | 5   |
|        |    |                 | Normal | 3999442050 | R03C01 | 0.2 |
| female | 68 | Treatment naive | LGA    | 3999442050 | R04C01 | 0.2 |
| male   | 51 | Treatment naive | LGA    | 3999442050 | R05C01 | 0.2 |
|        |    |                 | Normal | 3999442050 | R06C01 | 0.2 |
| male   | 48 | Treatment naive | LGA    | 3999442050 | R04C02 | 0.2 |
|        |    |                 | HGA    | 3999442050 | R05C02 | 2.5 |
|        |    |                 | Normal | 3999442050 | R03C02 | 0.2 |
| male   | 34 | Treatment naive | LGA    | 3999442050 | R06C02 | 0.9 |
|        |    |                 | Normal | 3999442119 | R01C01 | 0.8 |
| male   | 66 | Treatment naive | HGA    | 3999442119 | R01C02 | 1.5 |
|        |    |                 | LGA    | 3999442119 | R02C02 | 0.2 |
|        |    |                 | LGA    | 3999442119 | R03C02 | NA  |
|        |    |                 | HGA    | 3999442119 | R04C02 | 1.5 |
| female | 57 | Treatment naive | LGA    | 3999442103 | R06C02 | 0.2 |
|        |    |                 | LGA    | 3999442050 | R01C02 | 0.7 |
|        |    |                 | Normal | 3999442050 | R02C02 | 0.2 |
| male   | 80 | Treatment naive | HGA    | 3999442103 | R04C02 | NA  |
|        |    |                 | HGA    | 3999442119 | R06C02 | 0.2 |
|        |    |                 | Normal | 3999442103 | R05C02 | 1.5 |

Sentrix\_ID, the BeadChip ID provided by the manufacturer; Sentrix\_Position, position of the sample on the BeadChip.



**Table S7.** Public datasets.

| Dataset     | Normal | Adenoma | Cancer | Metastasis | White blood | Country/Source |
|-------------|--------|---------|--------|------------|-------------|----------------|
| GSE68060    | 36     |         | 82     |            |             | Spain          |
| GSE68838    | 38     |         | 255    |            |             | TCGA           |
| GSE77954    | 11     | 12      | 13     | 9          |             | US             |
| GSE77965    | 6      |         | 6      |            |             | Austria        |
| GSE81211    | 3      |         |        |            |             | South Korea    |
| GSE101764   | 149    |         | 112    |            |             | Germany        |
| GSE107352   | 21     |         | 30     |            |             | Spain          |
| E-MTAB-6450 | 8      | 39      |        |            |             | Germany        |
| GSE75546    | 6      |         | 6      |            |             | China          |
| GSE40279    |        |         |        |            | 656         | US             |
| Total       | 278    | 51      | 504    | 9          | 656         | 1498           |
